# Supplementary material for: Association of Proteomics Changes with Al-Sensitive Root Zones in Switchgrass
Source: Proteomes. 2018 Mar 22;6(2):15. doi: 10.3390/proteomes6020015 (PMC6027131; doi:10.3390/proteomes6020015)
Supplement: Supplementary file 1 [file proteomes-06-00015-s001.zip]

Archive with 5 entries (5 files):
- Supplementary materials/Mascot_F404577_Roottip10plexTMT0820.xlsx
- Supplementary materials/Mascot_F404766_elongation10plexTMT0820.xlsx
- Supplementary materials/supplementary materials Table S1.xlsx
- Supplementary materials/supplementary materials Table S2.xlsx
- Supplementary materials/Supplementary materials.pdf
