# Supplementary material for: Association of Proteomics Changes with Al-Sensitive Root Zones in Switchgrass
Source: Proteomes. 2018 Mar 22;6(2):15. doi: 10.3390/proteomes6020015 (PMC6027131; doi:10.3390/proteomes6020015)
Supplement: Supplementary file 1 [file proteomes-06-00015-s001.zip › Supplementary materials/Mascot_F404577_Roottip10plexTMT0820.xlsx]

## Sheet: F404577
Header	--------------------------------------------------------
Search title	Suping TMT switchgrass
Timestamp	2015-08-12T16:21:46Z
User	Kevin
Email	yy44@cornell.edu
Report URI	http://mascot.biotech.cornell.edu/mascot/cgi/master_results.pl?file=../data/20150812/F404577.dat
Peak list data path	C:\Users\yy44\Desktop\pkl\Suping_Zhujia_Roottip10plexTMT_Fusion_MS2 .mgf
Peak list format	Mascot generic
Search type	MIS
Mascot version	2.5.1
Database	SwgrassProteinsV1
Fasta file	Pvirgatum_v1.1_273_protein.fasta
Total sequences	125439
Total residues	39855606
Sequences after taxonomy filter	125439
Number of queries	709953
Decoy	--------------------------------------------------------
Number of matches above identity threshold in search of real database	29199
Number of matches above identity threshold in search of decoy database	240
Number of matches above homology threshold in search of real database	72580
Number of matches above homology threshold in search of decoy database	1300
Fixed modifications	--------------------------------------------------------
Identifier	Name	Delta	Neutral loss
1	TMT6plex (N-term)	229.163
2	TMT6plex (K)	229.163
Variable modifications	--------------------------------------------------------
Identifier	Name	Delta	Neutral loss(es)
1	Deamidated (NQ)	0.984016
2	Methylthio (C)	45.9877
3	Oxidation (M)	15.9949	0	63.9983
Search Parameters	--------------------------------------------------------
Taxonomy filter	All entries
Enzyme	Trypsin
Maximum Missed Cleavages	2
Fixed modifications	TMT6plex (N-term),TMT6plex (K)
Quantitation method	TMT 10plex_switchgrass_roottip
Variable modifications	Deamidated (NQ),Methylthio (C),Oxidation (M)
Peptide Mass Tolerance	15
Peptide Mass Tolerance Units	ppm
Fragment Mass Tolerance	0.8
Fragment Mass Tolerance Units	Da
Mass values	Monoisotopic
Instrument type	Default
Decoy database also searched	1
Format parameters	--------------------------------------------------------
Significance threshold	0.05
Max. number of hits	0
Use MudPIT protein scoring	1
Ions score cut-off	0.01
Include same-set proteins	0
Include sub-set proteins	1
Include unassigned	0
Require bold red	0
Use homology threshold	1
Group protein families	1
Re-score using Percolator	0
Show duplicate peptides	1
Quantitation header	--------------------------------------------------------
Normalisation base	126/130C	1.33762
Normalisation base	127c/130C	0.968952
Normalisation base	128c/130C	1.01162
Normalisation base	129c/130C	0.731541
Normalisation base	131/130C	1.09606
Normalisation base	127n/130C	1.06536
Normalisation base	128n/130C	0.849027
Normalisation base	129n/130C	1.03983
Normalisation base	130n/130C	1.13346
Protein hits	--------------------------------------------------------
prot_hit_num	prot_family_member	prot_acc	prot_desc	prot_score	prot_mass	prot_matches	prot_matches_sig	prot_sequences	prot_sequences_sig	prot_cover	prot_pi	pep_query	pep_rank	pep_isbold	pep_isunique	pep_exp_mz	pep_exp_mr	pep_exp_z	pep_calc_mr	pep_delta	pep_miss	pep_score	pep_homol	pep_ident	pep_expect	pep_res_before	pep_seq	pep_res_after	pep_var_mod	pep_var_mod_pos	pep_summed_mod_pos	pep_local_mod_pos	pep_scan_title
1	1	Pavir.Cb00504.1.p|PACid:30269945	Pavir.Cb00504.1.p|PACid:30269945	4421	82978	238	238	27	27	45.5	5.13	52159	1	0	1	575.348	1148.68	2	1148.68	0.0008	0	35.83	26	32	0.0057	K	ATSVGEK	N					File4254 Spectrum261785 scans: 6204	126/130C	1.629	127c/130C	1.62	128c/130C	1.439	129c/130C	1.878	131/130C	1.12	127n/130C	1.91	128n/130C	1.042	129n/130C	1.702
1	1	Pavir.Cb00504.1.p|PACid:30269945	Pavir.Cb00504.1.p|PACid:30269945	4421	82978	238	238	27	27	45.5	5.13	52163	1	0	1	575.348	1148.68	2	1148.68	0.0009	0	38.47	29	32	0.007	K	ATSVGEK	N					File4252 Spectrum176533 scans: 6526	126/130C	1.084	127c/130C	1.307	128c/130C	1.062	129c/130C	1.64	131/130C	1.248	127n/130C	1.345	128n/130C	0.889	129n/130C	1.184
1	1	Pavir.Cb00504.1.p|PACid:30269945	Pavir.Cb00504.1.p|PACid:30269945	4421	82978	238	238	27	27	45.5	5.13	52173	1	0	1	575.348	1148.68	2	1148.68	0.0014	0	40.54	30	32	0.005	K	ATSVGEK	N					File4252 Spectrum176262 scans: 6218	126/130C	-1936.19	127c/130C	-1158.18	128c/130C	218.005	129c/130C	-29.582	131/130C	-0.056	127n/130C	-1960.44	128n/130C	257.286	129n/130C	-22.026
1	1	Pavir.Cb00504.1.p|PACid:30269945	Pavir.Cb00504.1.p|PACid:30269945	4421	82978	238	238	27	27	45.5	5.13	52174	1	0	1	575.348	1148.68	2	1148.68	0.0015	0	35.84	27	32	0.0068	K	ATSVGEK	N					File4252 Spectrum176310 scans: 6274	126/130C	1.048	127c/130C	1.277	128c/130C	1.022	129c/130C	1.714	131/130C	1.378	127n/130C	1.431	128n/130C	0.945	129n/130C	1.269
1	1	Pavir.Cb00504.1.p|PACid:30269945	Pavir.Cb00504.1.p|PACid:30269945	4421	82978	238	238	27	27	45.5	5.13	109918	1	0	0	670.346	1338.68	2	1338.68	0.002	0	29.26	21	30	0.0079	K	CMEPVEK	C	Methylthio (C)	0.2000000.0			File4259 Spectrum465471 scans: 18921	126/130C	---	127c/130C	---	128c/130C	---	129c/130C	---	131/130C	---	127n/130C	---	128n/130C	---	129n/130C	---
1	1	Pavir.Cb00504.1.p|PACid:30269945	Pavir.Cb00504.1.p|PACid:30269945	4421	82978	238	238	27	27	45.5	5.13	144631	1	0	1	476.291	1425.85	3	1425.85	-0.0003	0	43.07	29	30	0.0021	K	DAGVIAGLNVLR	I					File4261 Spectrum564199 scans: 31456	126/130C	1.061	127c/130C	1.096	128c/130C	0.945	129c/130C	1.334	131/130C	1.399	127n/130C	1.15	128n/130C	1.052	129n/130C	1.306
1	1	Pavir.Cb00504.1.p|PACid:30269945	Pavir.Cb00504.1.p|PACid:30269945	4421	82978	238	238	27	27	45.5	5.13	144636	1	0	1	713.933	1425.85	2	1425.85	0	0	76.73		29	1.1e-06	K	DAGVIAGLNVLR	I					File4261 Spectrum563522 scans: 30715	126/130C	0.853	127c/130C	1.108	128c/130C	0.733	129c/130C	1.543	131/130C	1.197	127n/130C	1.229	128n/130C	0.852	129n/130C	1.007
1	1	Pavir.Cb00504.1.p|PACid:30269945	Pavir.Cb00504.1.p|PACid:30269945	4421	82978	238	238	27	27	45.5	5.13	144648	1	0	1	476.291	1425.85	3	1425.85	0.0003	0	49		29	0.0006	K	DAGVIAGLNVLR	I					File4261 Spectrum562786 scans: 29909	126/130C	2.224	127c/130C	2.38	128c/130C	1.491	129c/130C	2.492	131/130C	1.425	127n/130C	2.696	128n/130C	1.185	129n/130C	1.868
1	1	Pavir.Cb00504.1.p|PACid:30269945	Pavir.Cb00504.1.p|PACid:30269945	4421	82978	238	238	27	27	45.5	5.13	144649	1	0	1	476.291	1425.85	3	1425.85	0.0003	0	48.72		29	0.00064	K	DAGVIAGLNVLR	I					File4261 Spectrum563036 scans: 30182	126/130C	1.003	127c/130C	1.12	128c/130C	1.01	129c/130C	1.782	131/130C	1.408	127n/130C	1.232	128n/130C	0.73	129n/130C	1.268
1	1	Pavir.Cb00504.1.p|PACid:30269945	Pavir.Cb00504.1.p|PACid:30269945	4421	82978	238	238	27	27	45.5	5.13	144655	1	0	1	476.291	1425.85	3	1425.85	0.0005	0	34.88	24	29	0.0046	K	DAGVIAGLNVLR	I					File4261 Spectrum563930 scans: 31162	126/130C	1.095	127c/130C	1.035	128c/130C	0.905	129c/130C	0.917	131/130C	1.259	127n/130C	1.103	128n/130C	1.173	129n/130C	1.084
1	1	Pavir.Cb00504.1.p|PACid:30269945	Pavir.Cb00504.1.p|PACid:30269945	4421	82978	238	238	27	27	45.5	5.13	144666	1	0	1	476.291	1425.85	3	1425.85	0.0006	0	47.7	29	29	0.00078	K	DAGVIAGLNVLR	I					File4261 Spectrum562312 scans: 29381	126/130C	1.244	127c/130C	1.413	128c/130C	1.319	129c/130C	1.402	131/130C	1.231	127n/130C	1.585	128n/130C	0.881	129n/130C	1.451
1	1	Pavir.Cb00504.1.p|PACid:30269945	Pavir.Cb00504.1.p|PACid:30269945	4421	82978	238	238	27	27	45.5	5.13	144670	1	0	1	713.933	1425.85	2	1425.85	0.0006	0	40.89	28	29	0.0028	K	DAGVIAGLNVLR	I					File4261 Spectrum579004 scans: 48287	126/130C	1.694	127c/130C	1.829	128c/130C	1.319	129c/130C	2.664	131/130C	1.745	127n/130C	2.342	128n/130C	1.695	129n/130C	1.357
1	1	Pavir.Cb00504.1.p|PACid:30269945	Pavir.Cb00504.1.p|PACid:30269945	4421	82978	238	238	27	27	45.5	5.13	144672	1	0	1	713.933	1425.85	2	1425.85	0.0006	0	77.1		29	9.3e-07	K	DAGVIAGLNVLR	I					File4261 Spectrum563033 scans: 30179	126/130C	0.803	127c/130C	0.957	128c/130C	0.894	129c/130C	1.214	131/130C	1.157	127n/130C	1.013	128n/130C	0.591	129n/130C	0.927
1	1	Pavir.Cb00504.1.p|PACid:30269945	Pavir.Cb00504.1.p|PACid:30269945	4421	82978	238	238	27	27	45.5	5.13	144673	1	0	1	713.933	1425.85	2	1425.85	0.0006	0	50.69	27	29	0.00022	K	DAGVIAGLNVLR	I					File4261 Spectrum564325 scans: 31594	126/130C	0.999	127c/130C	1.13	128c/130C	1.21	129c/130C	1.622	131/130C	1.337	127n/130C	1.381	128n/130C	1.293	129n/130C	1.377
1	1	Pavir.Cb00504.1.p|PACid:30269945	Pavir.Cb00504.1.p|PACid:30269945	4421	82978	238	238	27	27	45.5	5.13	144682	1	0	1	713.933	1425.85	2	1425.85	0.0008	0	77.28		29	8.9e-07	K	DAGVIAGLNVLR	I					File4261 Spectrum562785 scans: 29908	126/130C	1.045	127c/130C	1.222	128c/130C	1.046	129c/130C	1.736	131/130C	1.346	127n/130C	1.487	128n/130C	0.948	129n/130C	1.104
1	1	Pavir.Cb00504.1.p|PACid:30269945	Pavir.Cb00504.1.p|PACid:30269945	4421	82978	238	238	27	27	45.5	5.13	144683	1	0	1	713.933	1425.85	2	1425.85	0.0008	0	54.89	24	29	4.3e-05	K	DAGVIAGLNVLR	I					File4264 Spectrum694161 scans: 29089	126/130C	0.943	127c/130C	0.953	128c/130C	1.134	129c/130C	1.468	131/130C	1.3	127n/130C	1.221	128n/130C	0.834	129n/130C	1.142
1	1	Pavir.Cb00504.1.p|PACid:30269945	Pavir.Cb00504.1.p|PACid:30269945	4421	82978	238	238	27	27	45.5	5.13	144685	1	0	1	476.291	1425.85	3	1425.85	0.0008	0	37.79	23	29	0.0017	K	DAGVIAGLNVLR	I					File4262 Spectrum606572 scans: 29101	126/130C	0.868	127c/130C	0.971	128c/130C	1.092	129c/130C	1.029	131/130C	1.02	127n/130C	0.916	128n/130C	0.979	129n/130C	0.933
1	1	Pavir.Cb00504.1.p|PACid:30269945	Pavir.Cb00504.1.p|PACid:30269945	4421	82978	238	238	27	27	45.5	5.13	144688	1	0	1	476.291	1425.85	3	1425.85	0.0009	0	38	27	29	0.0041	K	DAGVIAGLNVLR	I					File4261 Spectrum565407 scans: 32779	126/130C	1.237	127c/130C	0.975	128c/130C	0.837	129c/130C	1.018	131/130C	0.521	127n/130C	1.401	128n/130C	0.991	129n/130C	0.868
1	1	Pavir.Cb00504.1.p|PACid:30269945	Pavir.Cb00504.1.p|PACid:30269945	4421	82978	238	238	27	27	45.5	5.13	144690	1	0	1	476.291	1425.85	3	1425.85	0.0009	0	51.08		29	0.00037	K	DAGVIAGLNVLR	I					File4260 Spectrum517981 scans: 29280	126/130C	0.99	127c/130C	1.02	128c/130C	0.716	129c/130C	1.081	131/130C	1.076	127n/130C	0.914	128n/130C	0.808	129n/130C	1.103
1	1	Pavir.Cb00504.1.p|PACid:30269945	Pavir.Cb00504.1.p|PACid:30269945	4421	82978	238	238	27	27	45.5	5.13	144699	1	0	1	713.933	1425.85	2	1425.85	0.0009	0	51.36		29	0.00035	K	DAGVIAGLNVLR	I					File4261 Spectrum578163 scans: 47310	126/130C	0.644	127c/130C	1.038	128c/130C	0.751	129c/130C	0.936	131/130C	1.054	127n/130C	1.155	128n/130C	0.849	129n/130C	1.078
1	1	Pavir.Cb00504.1.p|PACid:30269945	Pavir.Cb00504.1.p|PACid:30269945	4421	82978	238	238	27	27	45.5	5.13	144702	1	0	1	476.291	1425.85	3	1425.85	0.0009	0	56.65		29	0.0001	K	DAGVIAGLNVLR	I					File4261 Spectrum563673 scans: 30881	126/130C	0.8	127c/130C	0.974	128c/130C	0.838	129c/130C	1.077	131/130C	0.946	127n/130C	0.895	128n/130C	0.918	129n/130C	0.86
1	1	Pavir.Cb00504.1.p|PACid:30269945	Pavir.Cb00504.1.p|PACid:30269945	4421	82978	238	238	27	27	45.5	5.13	144707	1	0	1	713.933	1425.85	2	1425.85	0.001	0	33.16	18	29	0.0019	K	DAGVIAGLNVLR	I					File4261 Spectrum577274 scans: 46199	126/130C	1.028	127c/130C	0.942	128c/130C	0.932	129c/130C	1.343	131/130C	1.104	127n/130C	1.396	128n/130C	1.116	129n/130C	0.647
1	1	Pavir.Cb00504.1.p|PACid:30269945	Pavir.Cb00504.1.p|PACid:30269945	4421	82978	238	238	27	27	45.5	5.13	144709	1	0	1	476.291	1425.85	3	1425.85	0.001	0	37.48	28	29	0.0059	K	DAGVIAGLNVLR	I					File4252 Spectrum196785 scans: 28849	126/130C	0.969	127c/130C	0.848	128c/130C	0.985	129c/130C	1.103	131/130C	0.789	127n/130C	1.065	128n/130C	1.188	129n/130C	1.083
1	1	Pavir.Cb00504.1.p|PACid:30269945	Pavir.Cb00504.1.p|PACid:30269945	4421	82978	238	238	27	27	45.5	5.13	144710	1	0	1	476.291	1425.85	3	1425.85	0.001	0	35.88	25	29	0.0042	K	DAGVIAGLNVLR	I					File4261 Spectrum564456 scans: 31736	126/130C	1.317	127c/130C	1.673	128c/130C	1.006	129c/130C	1.134	131/130C	2.047	127n/130C	1.176	128n/130C	1.117	129n/130C	2.018
1	1	Pavir.Cb00504.1.p|PACid:30269945	Pavir.Cb00504.1.p|PACid:30269945	4421	82978	238	238	27	27	45.5	5.13	144712	1	0	1	476.291	1425.85	3	1425.85	0.0011	0	43.79	28	30	0.0014	K	DAGVIAGLNVLR	I					File4260 Spectrum517739 scans: 29015	126/130C	0.985	127c/130C	1.126	128c/130C	0.606	129c/130C	1.073	131/130C	1.012	127n/130C	0.98	128n/130C	0.891	129n/130C	1.128
1	1	Pavir.Cb00504.1.p|PACid:30269945	Pavir.Cb00504.1.p|PACid:30269945	4421	82978	238	238	27	27	45.5	5.13	144720	1	0	1	713.933	1425.85	2	1425.85	0.0011	0	47.79		30	0.00085	K	DAGVIAGLNVLR	I					File4261 Spectrum577554 scans: 46593	126/130C	1.066	127c/130C	1.259	128c/130C	1.07	129c/130C	1.523	131/130C	1.33	127n/130C	1.283	128n/130C	0.759	129n/130C	1.129
1	1	Pavir.Cb00504.1.p|PACid:30269945	Pavir.Cb00504.1.p|PACid:30269945	4421	82978	238	238	27	27	45.5	5.13	144722	1	0	1	713.933	1425.85	2	1425.85	0.0011	0	54.99		30	0.00016	K	DAGVIAGLNVLR	I					File4261 Spectrum577388 scans: 46374	126/130C	0.911	127c/130C	1.282	128c/130C	0.997	129c/130C	1.774	131/130C	1.34	127n/130C	1.152	128n/130C	0.813	129n/130C	1.041
1	1	Pavir.Cb00504.1.p|PACid:30269945	Pavir.Cb00504.1.p|PACid:30269945	4421	82978	238	238	27	27	45.5	5.13	144723	1	0	1	713.933	1425.85	2	1425.85	0.0011	0	72.85		30	2.6e-06	K	DAGVIAGLNVLR	I					File4262 Spectrum606569 scans: 29098	126/130C	1.121	127c/130C	1.306	128c/130C	1.173	129c/130C	1.735	131/130C	1.402	127n/130C	1.262	128n/130C	0.881	129n/130C	1.175
1	1	Pavir.Cb00504.1.p|PACid:30269945	Pavir.Cb00504.1.p|PACid:30269945	4421	82978	238	238	27	27	45.5	5.13	144724	1	0	1	713.933	1425.85	2	1425.85	0.0011	0	75.61		30	1.4e-06	K	DAGVIAGLNVLR	I					File4261 Spectrum562319 scans: 29389	126/130C	2.848	127c/130C	2.77	128c/130C	2.337	129c/130C	2.832	131/130C	0.773	127n/130C	3.453	128n/130C	1.897	129n/130C	1.528
1	1	Pavir.Cb00504.1.p|PACid:30269945	Pavir.Cb00504.1.p|PACid:30269945	4421	82978	238	238	27	27	45.5	5.13	144729	1	0	1	476.291	1425.85	3	1425.85	0.0012	0	37.03	25	30	0.0035	K	DAGVIAGLNVLR	I					File4261 Spectrum564975 scans: 32305	126/130C	0.68	127c/130C	0.523	128c/130C	0.459	129c/130C	0.786	131/130C	0.681	127n/130C	0.753	128n/130C	0.776	129n/130C	0.608
1	1	Pavir.Cb00504.1.p|PACid:30269945	Pavir.Cb00504.1.p|PACid:30269945	4421	82978	238	238	27	27	45.5	5.13	144737	1	0	1	713.933	1425.85	2	1425.85	0.0013	0	49.44		30	0.00058	K	DAGVIAGLNVLR	I					File4261 Spectrum578373 scans: 47555	126/130C	1.22	127c/130C	1.697	128c/130C	0.905	129c/130C	2.273	131/130C	1.685	127n/130C	1.849	128n/130C	1.01	129n/130C	1.264
1	1	Pavir.Cb00504.1.p|PACid:30269945	Pavir.Cb00504.1.p|PACid:30269945	4421	82978	238	238	27	27	45.5	5.13	144739	1	0	1	713.933	1425.85	2	1425.85	0.0013	0	70.7		30	4.3e-06	K	DAGVIAGLNVLR	I					File4261 Spectrum564060 scans: 31305	126/130C	1.254	127c/130C	1.108	128c/130C	1.246	129c/130C	1.429	131/130C	1.477	127n/130C	1.399	128n/130C	1.073	129n/130C	1.302
1	1	Pavir.Cb00504.1.p|PACid:30269945	Pavir.Cb00504.1.p|PACid:30269945	4421	82978	238	238	27	27	45.5	5.13	144742	1	0	1	713.933	1425.85	2	1425.85	0.0013	0	79.3		30	6e-07	K	DAGVIAGLNVLR	I					File4261 Spectrum563273 scans: 30442	126/130C	0.907	127c/130C	1.042	128c/130C	1.048	129c/130C	1.474	131/130C	1.216	127n/130C	1.222	128n/130C	0.892	129n/130C	0.965
1	1	Pavir.Cb00504.1.p|PACid:30269945	Pavir.Cb00504.1.p|PACid:30269945	4421	82978	238	238	27	27	45.5	5.13	144746	1	0	1	476.291	1425.85	3	1425.85	0.0013	0	43.66	26	30	0.001	K	DAGVIAGLNVLR	I					File4264 Spectrum694144 scans: 29070	126/130C	0.731	127c/130C	1.037	128c/130C	0.771	129c/130C	0.903	131/130C	0.985	127n/130C	0.945	128n/130C	0.896	129n/130C	0.825
1	1	Pavir.Cb00504.1.p|PACid:30269945	Pavir.Cb00504.1.p|PACid:30269945	4421	82978	238	238	27	27	45.5	5.13	144747	1	0	1	476.291	1425.85	3	1425.85	0.0013	0	50.33	29	30	0.00042	K	DAGVIAGLNVLR	I					File4261 Spectrum562540 scans: 29637	126/130C	0.738	127c/130C	1.198	128c/130C	0.994	129c/130C	1.749	131/130C	1.207	127n/130C	1.312	128n/130C	1.193	129n/130C	0.884
1	1	Pavir.Cb00504.1.p|PACid:30269945	Pavir.Cb00504.1.p|PACid:30269945	4421	82978	238	238	27	27	45.5	5.13	144752	1	0	1	713.933	1425.85	2	1425.85	0.0014	0	52.14		30	0.00031	K	DAGVIAGLNVLR	I					File4261 Spectrum577949 scans: 47062	126/130C	1.211	127c/130C	1.307	128c/130C	0.925	129c/130C	1.706	131/130C	1.22	127n/130C	1.269	128n/130C	1.097	129n/130C	1.113
1	1	Pavir.Cb00504.1.p|PACid:30269945	Pavir.Cb00504.1.p|PACid:30269945	4421	82978	238	238	27	27	45.5	5.13	144754	1	0	1	713.933	1425.85	2	1425.85	0.0014	0	70.19		30	4.9e-06	K	DAGVIAGLNVLR	I					File4261 Spectrum562542 scans: 29640	126/130C	0.775	127c/130C	1.066	128c/130C	1.061	129c/130C	1.613	131/130C	1.198	127n/130C	1.376	128n/130C	0.606	129n/130C	1.09
1	1	Pavir.Cb00504.1.p|PACid:30269945	Pavir.Cb00504.1.p|PACid:30269945	4421	82978	238	238	27	27	45.5	5.13	144755	1	0	1	713.933	1425.85	2	1425.85	0.0014	0	67.08		30	1e-05	K	DAGVIAGLNVLR	I					File4260 Spectrum517971 scans: 29269	126/130C	0.984	127c/130C	0.937	128c/130C	0.81	129c/130C	1.101	131/130C	1.024	127n/130C	1.215	128n/130C	0.856	129n/130C	1.213
1	1	Pavir.Cb00504.1.p|PACid:30269945	Pavir.Cb00504.1.p|PACid:30269945	4421	82978	238	238	27	27	45.5	5.13	144756	1	0	1	713.933	1425.85	2	1425.85	0.0014	0	77.7		30	8.6e-07	K	DAGVIAGLNVLR	I					File4262 Spectrum606824 scans: 29375	126/130C	0.933	127c/130C	1.424	128c/130C	1.002	129c/130C	1.389	131/130C	1.262	127n/130C	1.442	128n/130C	0.802	129n/130C	0.977
1	1	Pavir.Cb00504.1.p|PACid:30269945	Pavir.Cb00504.1.p|PACid:30269945	4421	82978	238	238	27	27	45.5	5.13	144758	1	0	1	476.291	1425.85	3	1425.85	0.0014	0	48.88	29	30	0.00053	K	DAGVIAGLNVLR	I					File4262 Spectrum606826 scans: 29377	126/130C	1.04	127c/130C	1.361	128c/130C	1.31	129c/130C	1.32	131/130C	1.418	127n/130C	1.379	128n/130C	1.162	129n/130C	1.243
1	1	Pavir.Cb00504.1.p|PACid:30269945	Pavir.Cb00504.1.p|PACid:30269945	4421	82978	238	238	27	27	45.5	5.13	144770	1	0	1	713.933	1425.85	2	1425.85	0.0015	0	79.47		29	5.5e-07	K	DAGVIAGLNVLR	I					File4261 Spectrum563766 scans: 30982	126/130C	1.056	127c/130C	1.062	128c/130C	1.094	129c/130C	1.526	131/130C	1.297	127n/130C	1.273	128n/130C	1.008	129n/130C	1.125
1	1	Pavir.Cb00504.1.p|PACid:30269945	Pavir.Cb00504.1.p|PACid:30269945	4421	82978	238	238	27	27	45.5	5.13	144771	1	0	1	713.933	1425.85	2	1425.85	0.0015	0	59.72		29	5.2e-05	K	DAGVIAGLNVLR	I					File4260 Spectrum517720 scans: 28994	126/130C	1.001	127c/130C	1.167	128c/130C	0.945	129c/130C	1.444	131/130C	1.261	127n/130C	1.144	128n/130C	0.819	129n/130C	1.084
1	1	Pavir.Cb00504.1.p|PACid:30269945	Pavir.Cb00504.1.p|PACid:30269945	4421	82978	238	238	27	27	45.5	5.13	144773	1	0	1	476.291	1425.85	3	1425.85	0.0016	0	24.9	15	29	0.0057	K	DAGVIAGLNVLR	I					File4261 Spectrum578138 scans: 47281	126/130C	0.999	127c/130C	1.035	128c/130C	0.887	129c/130C	1.198	131/130C	0.973	127n/130C	1.046	128n/130C	0.878	129n/130C	1.458
1	1	Pavir.Cb00504.1.p|PACid:30269945	Pavir.Cb00504.1.p|PACid:30269945	4421	82978	238	238	27	27	45.5	5.13	144774	1	0	1	476.291	1425.85	3	1425.85	0.0016	0	28.32	20	29	0.0082	K	DAGVIAGLNVLR	I					File4261 Spectrum565111 scans: 32454	126/130C	1.415	127c/130C	1.243	128c/130C	1.31	129c/130C	0.973	131/130C	1.548	127n/130C	1.494	128n/130C	1.118	129n/130C	1.055
1	1	Pavir.Cb00504.1.p|PACid:30269945	Pavir.Cb00504.1.p|PACid:30269945	4421	82978	238	238	27	27	45.5	5.13	144775	1	0	1	476.291	1425.85	3	1425.85	0.0016	0	56.79		29	0.0001	K	DAGVIAGLNVLR	I					File4263 Spectrum650821 scans: 29391	126/130C	0.927	127c/130C	0.96	128c/130C	0.689	129c/130C	1.089	131/130C	0.947	127n/130C	1.139	128n/130C	0.617	129n/130C	0.981
1	1	Pavir.Cb00504.1.p|PACid:30269945	Pavir.Cb00504.1.p|PACid:30269945	4421	82978	238	238	27	27	45.5	5.13	144783	1	0	1	713.933	1425.85	2	1425.85	0.0016	0	61.78		29	3.2e-05	K	DAGVIAGLNVLR	I					File4261 Spectrum578582 scans: 47798	126/130C	1.225	127c/130C	1.114	128c/130C	0.937	129c/130C	1.373	131/130C	1.422	127n/130C	1.134	128n/130C	1.465	129n/130C	0.999
1	1	Pavir.Cb00504.1.p|PACid:30269945	Pavir.Cb00504.1.p|PACid:30269945	4421	82978	238	238	27	27	45.5	5.13	144786	1	0	1	713.933	1425.85	2	1425.85	0.0016	0	74.32		29	1.8e-06	K	DAGVIAGLNVLR	I					File4251 Spectrum154337 scans: 29242	126/130C	1.251	127c/130C	1.005	128c/130C	1.376	129c/130C	1.685	131/130C	1.652	127n/130C	1.341	128n/130C	1.082	129n/130C	1.384
1	1	Pavir.Cb00504.1.p|PACid:30269945	Pavir.Cb00504.1.p|PACid:30269945	4421	82978	238	238	27	27	45.5	5.13	144788	1	0	1	476.291	1425.85	3	1425.85	0.0017	0	42.93	27	29	0.0014	K	DAGVIAGLNVLR	I					File4261 Spectrum563437 scans: 30622	126/130C	0.862	127c/130C	1.057	128c/130C	1.092	129c/130C	0.879	131/130C	1.108	127n/130C	1.008	128n/130C	0.972	129n/130C	0.859
1	1	Pavir.Cb00504.1.p|PACid:30269945	Pavir.Cb00504.1.p|PACid:30269945	4421	82978	238	238	27	27	45.5	5.13	144793	1	0	1	713.933	1425.85	2	1425.85	0.0017	0	43.3		29	0.0023	K	DAGVIAGLNVLR	I					File4261 Spectrum578794 scans: 48043	126/130C	1.489	127c/130C	1.2	128c/130C	0.92	129c/130C	1.873	131/130C	1.067	127n/130C	1.241	128n/130C	0.264	129n/130C	1.114
1	1	Pavir.Cb00504.1.p|PACid:30269945	Pavir.Cb00504.1.p|PACid:30269945	4421	82978	238	238	27	27	45.5	5.13	144804	1	0	1	713.933	1425.85	2	1425.85	0.0019	0	59.11	28	29	4.8e-05	K	DAGVIAGLNVLR	I					File4261 Spectrum577751 scans: 46828	126/130C	1.133	127c/130C	1.01	128c/130C	0.83	129c/130C	1.252	131/130C	1.295	127n/130C	1.142	128n/130C	0.905	129n/130C	0.871
1	1	Pavir.Cb00504.1.p|PACid:30269945	Pavir.Cb00504.1.p|PACid:30269945	4421	82978	238	238	27	27	45.5	5.13	144811	1	0	1	713.934	1425.85	2	1425.85	0.0021	0	63.9		29	2e-05	K	DAGVIAGLNVLR	I					File4249 Spectrum65948 scans: 28927	126/130C	1.128	127c/130C	1.206	128c/130C	0.964	129c/130C	1.282	131/130C	1.256	127n/130C	1.126	128n/130C	1.055	129n/130C	1.165
1	1	Pavir.Cb00504.1.p|PACid:30269945	Pavir.Cb00504.1.p|PACid:30269945	4421	82978	238	238	27	27	45.5	5.13	144818	1	0	1	713.934	1425.85	2	1425.85	0.0024	0	58.33	28	29	5e-05	K	DAGVIAGLNVLR	I					File4250 Spectrum110299 scans: 29094	126/130C	1.112	127c/130C	1.256	128c/130C	1.191	129c/130C	1.544	131/130C	1.194	127n/130C	1.402	128n/130C	1.346	129n/130C	1.255
1	1	Pavir.Cb00504.1.p|PACid:30269945	Pavir.Cb00504.1.p|PACid:30269945	4421	82978	238	238	27	27	45.5	5.13	144821	1	0	1	476.292	1425.85	3	1425.85	0.0025	0	48.32	28	29	0.00056	K	DAGVIAGLNVLR	I					File4251 Spectrum154312 scans: 29214	126/130C	0.716	127c/130C	0.961	128c/130C	0.64	129c/130C	1.004	131/130C	0.944	127n/130C	0.714	128n/130C	0.63	129n/130C	0.711
1	1	Pavir.Cb00504.1.p|PACid:30269945	Pavir.Cb00504.1.p|PACid:30269945	4421	82978	238	238	27	27	45.5	5.13	144825	1	0	1	476.292	1425.85	3	1425.85	0.0032	0	40.22	28	29	0.0038	K	DAGVIAGLNVLR	I					File4261 Spectrum564723 scans: 32030	126/130C	1.188	127c/130C	0.692	128c/130C	1.287	129c/130C	1.249	131/130C	1.064	127n/130C	0.97	128n/130C	1.11	129n/130C	0.93
1	1	Pavir.Cb00504.1.p|PACid:30269945	Pavir.Cb00504.1.p|PACid:30269945	4421	82978	238	238	27	27	45.5	5.13	144827	1	0	1	476.292	1425.85	3	1425.85	0.0034	0	21.8	14	29	0.0095	K	DAGVIAGLNVLR	I					File4261 Spectrum577697 scans: 46763	126/130C	1.163	127c/130C	0.899	128c/130C	0.97	129c/130C	0.991	131/130C	0.848	127n/130C	0.951	128n/130C	0.765	129n/130C	1.027
1	1	Pavir.Cb00504.1.p|PACid:30269945	Pavir.Cb00504.1.p|PACid:30269945	4421	82978	238	238	27	27	45.5	5.13	144830	1	0	1	476.292	1425.85	3	1425.85	0.0038	0	31.12	20	30	0.0041	K	DAGVIAGLNVLR	I					File4249 Spectrum65930 scans: 28907	126/130C	1.118	127c/130C	1.284	128c/130C	0.708	129c/130C	1.313	131/130C	0.879	127n/130C	0.586	128n/130C	0.776	129n/130C	0.739
1	1	Pavir.Cb00504.1.p|PACid:30269945	Pavir.Cb00504.1.p|PACid:30269945	4421	82978	238	238	27	27	45.5	5.13	145143	1	0	1	476.619	1426.83	3	1426.83	0.0001	0	39.74	27	30	0.0029	K	DAGVIAGLNVLR	I	Deamidated (NQ)	0.000000001000.0			File4252 Spectrum195347 scans: 27257	126/130C	1.379	127c/130C	1.033	128c/130C	1.497	129c/130C	1.078	131/130C	1.137	127n/130C	1.441	128n/130C	1.261	129n/130C	1.278
1	1	Pavir.Cb00504.1.p|PACid:30269945	Pavir.Cb00504.1.p|PACid:30269945	4421	82978	238	238	27	27	45.5	5.13	145145	1	0	1	714.425	1426.84	2	1426.83	0.0004	0	39.12	26	30	0.0027	K	DAGVIAGLNVLR	I	Deamidated (NQ)	0.000000001000.0			File4254 Spectrum284031 scans: 30682	126/130C	1.054	127c/130C	1.295	128c/130C	1.22	129c/130C	1.066	131/130C	1.309	127n/130C	1.074	128n/130C	1.095	129n/130C	0.922
1	1	Pavir.Cb00504.1.p|PACid:30269945	Pavir.Cb00504.1.p|PACid:30269945	4421	82978	238	238	27	27	45.5	5.13	145156	1	0	1	476.62	1426.84	3	1426.83	0.0022	0	42.48		31	0.0036	K	DAGVIAGLNVLR	I	Deamidated (NQ)	0.000000001000.0			File4255 Spectrum326521 scans: 30091	126/130C	0.71	127c/130C	1.053	128c/130C	0.945	129c/130C	1.237	131/130C	1.053	127n/130C	1.166	128n/130C	0.899	129n/130C	1.159
1	1	Pavir.Cb00504.1.p|PACid:30269945	Pavir.Cb00504.1.p|PACid:30269945	4421	82978	238	238	27	27	45.5	5.13	145158	1	0	1	714.426	1426.84	2	1426.83	0.0035	0	65.07	31	31	2e-05	K	DAGVIAGLNVLR	I	Deamidated (NQ)	0.000000001000.0			File4255 Spectrum326507 scans: 30076	126/130C	0.924	127c/130C	1.077	128c/130C	0.945	129c/130C	1.02	131/130C	1.172	127n/130C	1.07	128n/130C	0.93	129n/130C	0.919
1	1	Pavir.Cb00504.1.p|PACid:30269945	Pavir.Cb00504.1.p|PACid:30269945	4421	82978	238	238	27	27	45.5	5.13	158066	1	0	0	729.4	1456.79	2	1456.78	0.0013	0	55.5	22	31	2.5e-05	R	VEIIANDQGNR	T					File4249 Spectrum52623 scans: 14395	126/130C	---	127c/130C	---	128c/130C	---	129c/130C	---	131/130C	---	127n/130C	---	128n/130C	---	129n/130C	---
1	1	Pavir.Cb00504.1.p|PACid:30269945	Pavir.Cb00504.1.p|PACid:30269945	4421	82978	238	238	27	27	45.5	5.13	158365	1	0	0	729.892	1457.77	2	1457.77	0.0012	0	52.57	24	31	7.4e-05	R	VEIIANDQGNR	T	Deamidated (NQ)	0.00000100000.0			File4259 Spectrum462868 scans: 16055	126/130C	---	127c/130C	---	128c/130C	---	129c/130C	---	131/130C	---	127n/130C	---	128n/130C	---	129n/130C	---
1	1	Pavir.Cb00504.1.p|PACid:30269945	Pavir.Cb00504.1.p|PACid:30269945	4421	82978	238	238	27	27	45.5	5.13	158368	1	0	0	729.892	1457.77	2	1457.77	0.0017	0	35	24	31	0.0045	R	VEIIANDQGNR	T	Deamidated (NQ)	0.00000100000.0			File4261 Spectrum550017 scans: 16001	126/130C	---	127c/130C	---	128c/130C	---	129c/130C	---	131/130C	---	127n/130C	---	128n/130C	---	129n/130C	---
1	1	Pavir.Cb00504.1.p|PACid:30269945	Pavir.Cb00504.1.p|PACid:30269945	4421	82978	238	238	27	27	45.5	5.13	158370	1	0	0	729.892	1457.77	2	1457.77	0.0018	0	50.59	26	31	0.00019	R	VEIIANDQGNR	T	Deamidated (NQ)	0.00000000010.0			File4262 Spectrum593972 scans: 15390	126/130C	---	127c/130C	---	128c/130C	---	129c/130C	---	131/130C	---	127n/130C	---	128n/130C	---	129n/130C	---
1	1	Pavir.Cb00504.1.p|PACid:30269945	Pavir.Cb00504.1.p|PACid:30269945	4421	82978	238	238	27	27	45.5	5.13	201422	1	0	0	779.893	1557.77	2	1557.77	0.0005	0	40.43	23	30	0.0011	R	FEELNMDLFR	K	Oxidation (M)	0.0000030000.0			File4253 Spectrum242175 scans: 31934	126/130C	---	127c/130C	---	128c/130C	---	129c/130C	---	131/130C	---	127n/130C	---	128n/130C	---	129n/130C	---
1	1	Pavir.Cb00504.1.p|PACid:30269945	Pavir.Cb00504.1.p|PACid:30269945	4421	82978	238	238	27	27	45.5	5.13	201428	1	0	0	779.893	1557.77	2	1557.77	0.0019	0	49.94	24	30	0.00015	R	FEELNMDLFR	K	Oxidation (M)	0.0000030000.0			File4259 Spectrum477616 scans: 32444	126/130C	---	127c/130C	---	128c/130C	---	129c/130C	---	131/130C	---	127n/130C	---	128n/130C	---	129n/130C	---
1	1	Pavir.Cb00504.1.p|PACid:30269945	Pavir.Cb00504.1.p|PACid:30269945	4421	82978	238	238	27	27	45.5	5.13	215203	1	0	0	795.514	1589.01	2	1589.01	0.0015	1	21.86	14	28	0.0089	R	NTTIPTKK	E					File4254 Spectrum265144 scans: 9995	126/130C	---	127c/130C	---	128c/130C	---	129c/130C	---	131/130C	---	127n/130C	---	128n/130C	---	129n/130C	---
1	1	Pavir.Cb00504.1.p|PACid:30269945	Pavir.Cb00504.1.p|PACid:30269945	4421	82978	238	238	27	27	45.5	5.13	215225	1	0	0	795.514	1589.01	2	1589.01	0.0016	1	24.66	14	28	0.0049	R	NTTIPTKK	E					File4254 Spectrum265392 scans: 10269	126/130C	---	127c/130C	---	128c/130C	---	129c/130C	---	131/130C	---	127n/130C	---	128n/130C	---	129n/130C	---
1	1	Pavir.Cb00504.1.p|PACid:30269945	Pavir.Cb00504.1.p|PACid:30269945	4421	82978	238	238	27	27	45.5	5.13	215235	1	0	0	795.514	1589.01	2	1589.01	0.0017	1	24.75	14	28	0.0048	R	NTTIPTKK	E					File4253 Spectrum222379 scans: 10139	126/130C	---	127c/130C	---	128c/130C	---	129c/130C	---	131/130C	---	127n/130C	---	128n/130C	---	129n/130C	---
1	1	Pavir.Cb00504.1.p|PACid:30269945	Pavir.Cb00504.1.p|PACid:30269945	4421	82978	238	238	27	27	45.5	5.13	215711	1	0	0	796.014	1590.01	2	1590	0.0184	1	23.25	15	30	0.0075	R	NTTIPTKK	E	Deamidated (NQ)	0.10000000.0			File4254 Spectrum265638 scans: 10541	126/130C	---	127c/130C	---	128c/130C	---	129c/130C	---	131/130C	---	127n/130C	---	128n/130C	---	129n/130C	---
1	1	Pavir.Cb00504.1.p|PACid:30269945	Pavir.Cb00504.1.p|PACid:30269945	4421	82978	238	238	27	27	45.5	5.13	227886	1	0	1	810.389	1618.76	2	1618.76	0.0024	0	41.02		28	0.0028	K	NSLENYSYNMR	N					File4263 Spectrum640424 scans: 18036	126/130C	1.148	127c/130C	1.353	128c/130C	0.987	129c/130C	1.533	131/130C	1.308	127n/130C	1.217	128n/130C	1.121	129n/130C	1.156
1	1	Pavir.Cb00504.1.p|PACid:30269945	Pavir.Cb00504.1.p|PACid:30269945	4421	82978	238	238	27	27	45.5	5.13	235759	1	0	1	818.386	1634.76	2	1634.76	0.001	0	48.98	22	27	0.00011	K	NSLENYSYNMR	N	Oxidation (M)	0.00000000030.0			File4259 Spectrum461301 scans: 14278	126/130C	0.961	127c/130C	0.912	128c/130C	1.066	129c/130C	1.322	131/130C	1.271	127n/130C	1.301	128n/130C	0.625	129n/130C	1.114
1	1	Pavir.Cb00504.1.p|PACid:30269945	Pavir.Cb00504.1.p|PACid:30269945	4421	82978	238	238	27	27	45.5	5.13	235767	1	0	1	818.386	1634.76	2	1634.76	0.002	0	46.26		27	0.00065	K	NSLENYSYNMR	N	Oxidation (M)	0.00000000030.0			File4262 Spectrum592860 scans: 14176	126/130C	1.102	127c/130C	0.894	128c/130C	1.129	129c/130C	1.584	131/130C	1.353	127n/130C	1.349	128n/130C	0.97	129n/130C	1.349
1	1	Pavir.Cb00504.1.p|PACid:30269945	Pavir.Cb00504.1.p|PACid:30269945	4421	82978	238	238	27	27	45.5	5.13	235768	1	0	1	818.386	1634.76	2	1634.76	0.002	0	45.56	21	27	0.00021	K	NSLENYSYNMR	N	Oxidation (M)	0.00000000030.0			File4258 Spectrum417315 scans: 14120	126/130C	1.13	127c/130C	1.119	128c/130C	0.995	129c/130C	1.339	131/130C	1.458	127n/130C	1.338	128n/130C	0.766	129n/130C	1.219
1	1	Pavir.Cb00504.1.p|PACid:30269945	Pavir.Cb00504.1.p|PACid:30269945	4421	82978	238	238	27	27	45.5	5.13	235769	1	0	1	818.386	1634.76	2	1634.76	0.0023	0	45.22	21	27	0.00022	K	NSLENYSYNMR	N	Oxidation (M)	0.00000000030.0			File4259 Spectrum461060 scans: 14013	126/130C	1.357	127c/130C	1.367	128c/130C	1.075	129c/130C	1.663	131/130C	1.666	127n/130C	1.382	128n/130C	1.024	129n/130C	0.995
1	1	Pavir.Cb00504.1.p|PACid:30269945	Pavir.Cb00504.1.p|PACid:30269945	4421	82978	238	238	27	27	45.5	5.13	236161	1	0	1	818.869	1635.72	2	1635.74	-0.0165	0	23.34	14	24	0.0065	K	NSLENYSYNMR	N	Deamidated (NQ); Oxidation (M)	0.00000000130.0			File4262 Spectrum593066 scans: 14398	126/130C	1.192	127c/130C	1.552	128c/130C	1.162	129c/130C	1.304	131/130C	1.517	127n/130C	1.588	128n/130C	0.773	129n/130C	2.013
1	1	Pavir.Cb00504.1.p|PACid:30269945	Pavir.Cb00504.1.p|PACid:30269945	4421	82978	238	238	27	27	45.5	5.13	236165	1	0	1	818.878	1635.74	2	1635.74	0.0004	0	22.08	14	26	0.0085	K	NSLENYSYNMR	N	Deamidated (NQ); Oxidation (M)	0.00000000130.0			File4258 Spectrum418188 scans: 15077	126/130C	0.775	127c/130C	0.9	128c/130C	0.995	129c/130C	1.225	131/130C	1.178	127n/130C	1.251	128n/130C	0.78	129n/130C	0.928
1	1	Pavir.Cb00504.1.p|PACid:30269945	Pavir.Cb00504.1.p|PACid:30269945	4421	82978	238	238	27	27	45.5	5.13	236169	1	0	1	818.88	1635.74	2	1635.74	0.0042	0	23.87	14	26	0.0058	K	NSLENYSYNMR	N	Deamidated (NQ); Oxidation (M)	0.00000000130.0			File4255 Spectrum311949 scans: 14194	126/130C	1.07	127c/130C	0.906	128c/130C	1.166	129c/130C	1.326	131/130C	1.177	127n/130C	1.152	128n/130C	0.916	129n/130C	1.063
1	1	Pavir.Cb00504.1.p|PACid:30269945	Pavir.Cb00504.1.p|PACid:30269945	4421	82978	238	238	27	27	45.5	5.13	238880	1	0	0	821.46	1640.91	2	1640.9	0.001	0	29.9	16	32	0.0022	K	SSVHDVVLVGGSTR	I					File4252 Spectrum182120 scans: 12754	126/130C	---	127c/130C	---	128c/130C	---	129c/130C	---	131/130C	---	127n/130C	---	128n/130C	---	129n/130C	---
1	1	Pavir.Cb00504.1.p|PACid:30269945	Pavir.Cb00504.1.p|PACid:30269945	4421	82978	238	238	27	27	45.5	5.13	238881	1	0	0	547.976	1640.91	3	1640.9	0.0011	0	26.58	18	32	0.0081	K	SSVHDVVLVGGSTR	I					File4252 Spectrum182078 scans: 12709	126/130C	---	127c/130C	---	128c/130C	---	129c/130C	---	131/130C	---	127n/130C	---	128n/130C	---	129n/130C	---
1	1	Pavir.Cb00504.1.p|PACid:30269945	Pavir.Cb00504.1.p|PACid:30269945	4421	82978	238	238	27	27	45.5	5.13	238883	1	0	0	821.461	1640.91	2	1640.9	0.0016	0	58.27	18	32	5.4e-06	K	SSVHDVVLVGGSTR	I					File4252 Spectrum181873 scans: 12485	126/130C	---	127c/130C	---	128c/130C	---	129c/130C	---	131/130C	---	127n/130C	---	128n/130C	---	129n/130C	---
1	1	Pavir.Cb00504.1.p|PACid:30269945	Pavir.Cb00504.1.p|PACid:30269945	4421	82978	238	238	27	27	45.5	5.13	251780	1	0	1	834.965	1667.92	2	1667.91	0.0024	0	31.68	18	32	0.0025	R	FTDASVQSDIK	L					File4255 Spectrum317669 scans: 20442	126/130C	1.025	127c/130C	0.698	128c/130C	1.057	129c/130C	1.215	131/130C	0.976	127n/130C	1.057	128n/130C	0.714	129n/130C	1.044
1	1	Pavir.Cb00504.1.p|PACid:30269945	Pavir.Cb00504.1.p|PACid:30269945	4421	82978	238	238	27	27	45.5	5.13	251781	1	0	1	834.965	1667.92	2	1667.91	0.0024	0	47.58	21	32	0.00011	R	FTDASVQSDIK	L					File4254 Spectrum275034 scans: 20834	126/130C	1.338	127c/130C	1.062	128c/130C	1.2	129c/130C	1.367	131/130C	1.07	127n/130C	1.508	128n/130C	1.191	129n/130C	1.713
1	1	Pavir.Cb00504.1.p|PACid:30269945	Pavir.Cb00504.1.p|PACid:30269945	4421	82978	238	238	27	27	45.5	5.13	268264	1	0	1	851.928	1701.84	2	1701.84	0.001	0	43.48	22	30	0.00042	R	TTPSYVAFTDSER	L					File4263 Spectrum641934 scans: 19677	126/130C	1.28	127c/130C	1.234	128c/130C	1.247	129c/130C	2.112	131/130C	1.48	127n/130C	1.644	128n/130C	1.122	129n/130C	1.455
1	1	Pavir.Cb00504.1.p|PACid:30269945	Pavir.Cb00504.1.p|PACid:30269945	4421	82978	238	238	27	27	45.5	5.13	268268	1	0	1	851.928	1701.84	2	1701.84	0.0012	0	32.86	23	30	0.0054	R	TTPSYVAFTDSER	L					File4264 Spectrum685658 scans: 19854	126/130C	0.909	127c/130C	1.1	128c/130C	0.939	129c/130C	1.426	131/130C	1.133	127n/130C	1.194	128n/130C	0.767	129n/130C	0.942
1	1	Pavir.Cb00504.1.p|PACid:30269945	Pavir.Cb00504.1.p|PACid:30269945	4421	82978	238	238	27	27	45.5	5.13	268270	1	0	1	568.288	1701.84	3	1701.84	0.0013	0	30.47	20	30	0.0045	R	TTPSYVAFTDSER	L					File4262 Spectrum597911 scans: 19687	126/130C	0.921	127c/130C	0.637	128c/130C	0.983	129c/130C	0.677	131/130C	0.714	127n/130C	1.285	128n/130C	1.013	129n/130C	0.741
1	1	Pavir.Cb00504.1.p|PACid:30269945	Pavir.Cb00504.1.p|PACid:30269945	4421	82978	238	238	27	27	45.5	5.13	268273	1	0	1	851.929	1701.84	2	1701.84	0.0014	0	36.85	27	30	0.0054	R	TTPSYVAFTDSER	L					File4262 Spectrum597887 scans: 19661	126/130C	1.066	127c/130C	1.001	128c/130C	0.991	129c/130C	1.76	131/130C	1.206	127n/130C	1.359	128n/130C	0.931	129n/130C	1.152
1	1	Pavir.Cb00504.1.p|PACid:30269945	Pavir.Cb00504.1.p|PACid:30269945	4421	82978	238	238	27	27	45.5	5.13	268282	1	0	1	851.929	1701.84	2	1701.84	0.0019	0	54.27	23	30	4e-05	R	TTPSYVAFTDSER	L					File4262 Spectrum598139 scans: 19934	126/130C	1.035	127c/130C	1.11	128c/130C	0.903	129c/130C	1.536	131/130C	1.349	127n/130C	1.206	128n/130C	0.588	129n/130C	1.285
1	1	Pavir.Cb00504.1.p|PACid:30269945	Pavir.Cb00504.1.p|PACid:30269945	4421	82978	238	238	27	27	45.5	5.13	268292	1	0	1	851.929	1701.84	2	1701.84	0.0028	0	29.32	20	30	0.0072	R	TTPSYVAFTDSER	L					File4263 Spectrum642189 scans: 19955	126/130C	1.223	127c/130C	1.205	128c/130C	0.833	129c/130C	1.425	131/130C	1.361	127n/130C	1.166	128n/130C	0.894	129n/130C	1.047
1	1	Pavir.Cb00504.1.p|PACid:30269945	Pavir.Cb00504.1.p|PACid:30269945	4421	82978	238	238	27	27	45.5	5.13	285112	1	0	1	869.492	1736.97	2	1736.97	0.0014	0	28.69	14	33	0.002	R	MVNHFVLEFK	R	Oxidation (M)	0.3000000000.0			File4251 Spectrum152636 scans: 27359	126/130C	0.878	127c/130C	0.69	128c/130C	0.771	129c/130C	1.805	131/130C	1.229	127n/130C	1.716	128n/130C	0.368	129n/130C	0.772
1	1	Pavir.Cb00504.1.p|PACid:30269945	Pavir.Cb00504.1.p|PACid:30269945	4421	82978	238	238	27	27	45.5	5.13	292382	1	0	0	877.012	1752.01	2	1752.01	0.0018	0	34.97	17	32	0.001	R	EIAEAYLGSTIK	N					File4260 Spectrum517134 scans: 28354	126/130C	---	127c/130C	---	128c/130C	---	129c/130C	---	131/130C	---	127n/130C	---	128n/130C	---	129n/130C	---
1	1	Pavir.Cb00504.1.p|PACid:30269945	Pavir.Cb00504.1.p|PACid:30269945	4421	82978	238	238	27	27	45.5	5.13	292384	1	0	0	585.01	1752.01	3	1752.01	0.002	0	27.66	16	32	0.0039	R	EIAEAYLGSTIK	N					File4260 Spectrum517133 scans: 28353	126/130C	---	127c/130C	---	128c/130C	---	129c/130C	---	131/130C	---	127n/130C	---	128n/130C	---	129n/130C	---
1	1	Pavir.Cb00504.1.p|PACid:30269945	Pavir.Cb00504.1.p|PACid:30269945	4421	82978	238	238	27	27	45.5	5.13	292385	1	0	0	585.01	1752.01	3	1752.01	0.002	0	25.76	17	32	0.0068	R	EIAEAYLGSTIK	N					File4260 Spectrum517383 scans: 28625	126/130C	---	127c/130C	---	128c/130C	---	129c/130C	---	131/130C	---	127n/130C	---	128n/130C	---	129n/130C	---
1	1	Pavir.Cb00504.1.p|PACid:30269945	Pavir.Cb00504.1.p|PACid:30269945	4421	82978	238	238	27	27	45.5	5.13	305958	1	0	0	595.976	1784.91	3	1784.91	-0.0016	1	28.88	14	32	0.002	R	ARFEELNMDLFR	K	Oxidation (M)	0.000000030000.0			File4259 Spectrum474220 scans: 28561	126/130C	---	127c/130C	---	128c/130C	---	129c/130C	---	131/130C	---	127n/130C	---	128n/130C	---	129n/130C	---
1	1	Pavir.Cb00504.1.p|PACid:30269945	Pavir.Cb00504.1.p|PACid:30269945	4421	82978	238	238	27	27	45.5	5.13	305964	1	0	0	595.977	1784.91	3	1784.91	0.0009	1	25.96	15	32	0.0046	R	ARFEELNMDLFR	K	Oxidation (M)	0.000000030000.0			File4260 Spectrum515746 scans: 26839	126/130C	---	127c/130C	---	128c/130C	---	129c/130C	---	131/130C	---	127n/130C	---	128n/130C	---	129n/130C	---
1	1	Pavir.Cb00504.1.p|PACid:30269945	Pavir.Cb00504.1.p|PACid:30269945	4421	82978	238	238	27	27	45.5	5.13	305965	1	0	0	595.977	1784.91	3	1784.91	0.0013	1	36.89	18	32	0.00069	R	ARFEELNMDLFR	K	Oxidation (M)	0.000000030000.0			File4258 Spectrum429573 scans: 27518	126/130C	---	127c/130C	---	128c/130C	---	129c/130C	---	131/130C	---	127n/130C	---	128n/130C	---	129n/130C	---
1	1	Pavir.Cb00504.1.p|PACid:30269945	Pavir.Cb00504.1.p|PACid:30269945	4421	82978	238	238	27	27	45.5	5.13	305971	1	0	0	595.977	1784.91	3	1784.91	0.0018	1	27.89	20	32	0.0085	R	ARFEELNMDLFR	K	Oxidation (M)	0.000000030000.0			File4259 Spectrum474681 scans: 29077	126/130C	---	127c/130C	---	128c/130C	---	129c/130C	---	131/130C	---	127n/130C	---	128n/130C	---	129n/130C	---
1	1	Pavir.Cb00504.1.p|PACid:30269945	Pavir.Cb00504.1.p|PACid:30269945	4421	82978	238	238	27	27	45.5	5.13	305973	1	0	0	595.977	1784.91	3	1784.91	0.002	1	25.18	17	32	0.008	R	ARFEELNMDLFR	K	Oxidation (M)	0.000000030000.0			File4253 Spectrum236936 scans: 26143	126/130C	---	127c/130C	---	128c/130C	---	129c/130C	---	131/130C	---	127n/130C	---	128n/130C	---	129n/130C	---
1	1	Pavir.Cb00504.1.p|PACid:30269945	Pavir.Cb00504.1.p|PACid:30269945	4421	82978	238	238	27	27	45.5	5.13	305974	1	0	0	595.977	1784.91	3	1784.91	0.0022	1	34.7	20	32	0.0018	R	ARFEELNMDLFR	K	Oxidation (M)	0.000000030000.0			File4259 Spectrum474454 scans: 28823	126/130C	---	127c/130C	---	128c/130C	---	129c/130C	---	131/130C	---	127n/130C	---	128n/130C	---	129n/130C	---
1	1	Pavir.Cb00504.1.p|PACid:30269945	Pavir.Cb00504.1.p|PACid:30269945	4421	82978	238	238	27	27	45.5	5.13	305976	1	0	0	595.978	1784.91	3	1784.91	0.0029	1	33.84	22	32	0.0036	R	ARFEELNMDLFR	K	Oxidation (M)	0.000000030000.0			File4253 Spectrum236694 scans: 25877	126/130C	---	127c/130C	---	128c/130C	---	129c/130C	---	131/130C	---	127n/130C	---	128n/130C	---	129n/130C	---
1	1	Pavir.Cb00504.1.p|PACid:30269945	Pavir.Cb00504.1.p|PACid:30269945	4421	82978	238	238	27	27	45.5	5.13	326760	1	0	1	917.515	1833.02	2	1833.01	0.0019	0	61.66	26	33	1.6e-05	K	ELESLCNPIIAK	M	Methylthio (C)	0.000002000000.0			File4253 Spectrum247445 scans: 37920	126/130C	0.958	127c/130C	1.215	128c/130C	1.231	129c/130C	1.293	131/130C	1.155	127n/130C	1.224	128n/130C	0.901	129n/130C	1.268
1	1	Pavir.Cb00504.1.p|PACid:30269945	Pavir.Cb00504.1.p|PACid:30269945	4421	82978	238	238	27	27	45.5	5.13	326764	1	0	1	917.516	1833.02	2	1833.01	0.002	0	39.01	19	33	0.00051	K	ELESLCNPIIAK	M	Methylthio (C)	0.000002000000.0			File4254 Spectrum290530 scans: 38038	126/130C	0.766	127c/130C	1.325	128c/130C	1.312	129c/130C	1.147	131/130C	1.063	127n/130C	1.323	128n/130C	0.575	129n/130C	0.957
1	1	Pavir.Cb00504.1.p|PACid:30269945	Pavir.Cb00504.1.p|PACid:30269945	4421	82978	238	238	27	27	45.5	5.13	326765	1	0	1	917.516	1833.02	2	1833.01	0.002	0	56.67	21	33	1.6e-05	K	ELESLCNPIIAK	M	Methylthio (C)	0.000002000000.0			File4253 Spectrum247232 scans: 37673	126/130C	0.911	127c/130C	1.233	128c/130C	1.453	129c/130C	1.345	131/130C	1.132	127n/130C	1.634	128n/130C	0.818	129n/130C	1.454
1	1	Pavir.Cb00504.1.p|PACid:30269945	Pavir.Cb00504.1.p|PACid:30269945	4421	82978	238	238	27	27	45.5	5.13	326767	1	0	1	612.013	1833.02	3	1833.01	0.0023	0	31.75	19	33	0.003	K	ELESLCNPIIAK	M	Methylthio (C)	0.000002000000.0			File4254 Spectrum290709 scans: 38244	126/130C	0.998	127c/130C	1.321	128c/130C	1.183	129c/130C	1.586	131/130C	1.303	127n/130C	1.487	128n/130C	1.109	129n/130C	1.353
1	1	Pavir.Cb00504.1.p|PACid:30269945	Pavir.Cb00504.1.p|PACid:30269945	4421	82978	238	238	27	27	45.5	5.13	326770	1	0	1	917.516	1833.02	2	1833.01	0.0024	0	54.39	23	33	4.4e-05	K	ELESLCNPIIAK	M	Methylthio (C)	0.000002000000.0			File4252 Spectrum204702 scans: 37862	126/130C	0.836	127c/130C	1.13	128c/130C	1.441	129c/130C	1.141	131/130C	1.027	127n/130C	1.536	128n/130C	0.783	129n/130C	1.182
1	1	Pavir.Cb00504.1.p|PACid:30269945	Pavir.Cb00504.1.p|PACid:30269945	4421	82978	238	238	27	27	45.5	5.13	326773	1	0	1	612.013	1833.02	3	1833.01	0.0026	0	31.43	21	33	0.0047	K	ELESLCNPIIAK	M	Methylthio (C)	0.000002000000.0			File4253 Spectrum247259 scans: 37704	126/130C	1.127	127c/130C	1.209	128c/130C	1.362	129c/130C	1.398	131/130C	1.367	127n/130C	1.411	128n/130C	1.063	129n/130C	1.455
1	1	Pavir.Cb00504.1.p|PACid:30269945	Pavir.Cb00504.1.p|PACid:30269945	4421	82978	238	238	27	27	45.5	5.13	326774	1	0	1	917.516	1833.02	2	1833.01	0.0027	0	30.26	21	33	0.0069	K	ELESLCNPIIAK	M	Methylthio (C)	0.000002000000.0			File4252 Spectrum204916 scans: 38108	126/130C	0.954	127c/130C	0.909	128c/130C	0.595	129c/130C	1.457	131/130C	0.844	127n/130C	0.769	128n/130C	1.064	129n/130C	1.02
1	1	Pavir.Cb00504.1.p|PACid:30269945	Pavir.Cb00504.1.p|PACid:30269945	4421	82978	238	238	27	27	45.5	5.13	355078	1	0	0	952.951	1903.89	2	1903.89	0.001	0	30.01	19	29	0.0046	K	ATAGDTHLGGEDFDNR	M					File4250 Spectrum94882 scans: 12304	126/130C	---	127c/130C	---	128c/130C	---	129c/130C	---	131/130C	---	127n/130C	---	128n/130C	---	129n/130C	---
1	1	Pavir.Cb00504.1.p|PACid:30269945	Pavir.Cb00504.1.p|PACid:30269945	4421	82978	238	238	27	27	45.5	5.13	355082	1	0	0	635.636	1903.89	3	1903.89	0.0011	0	26.6	19	29	0.0093	K	ATAGDTHLGGEDFDNR	M					File4249 Spectrum50395 scans: 11953	126/130C	---	127c/130C	---	128c/130C	---	129c/130C	---	131/130C	---	127n/130C	---	128n/130C	---	129n/130C	---
1	1	Pavir.Cb00504.1.p|PACid:30269945	Pavir.Cb00504.1.p|PACid:30269945	4421	82978	238	238	27	27	45.5	5.13	355084	1	0	0	952.951	1903.89	2	1903.89	0.0012	0	48.47	23	29	0.00014	K	ATAGDTHLGGEDFDNR	M					File4264 Spectrum678852 scans: 12447	126/130C	---	127c/130C	---	128c/130C	---	129c/130C	---	131/130C	---	127n/130C	---	128n/130C	---	129n/130C	---
1	1	Pavir.Cb00504.1.p|PACid:30269945	Pavir.Cb00504.1.p|PACid:30269945	4421	82978	238	238	27	27	45.5	5.13	355090	1	0	0	635.636	1903.89	3	1903.89	0.0012	0	25.43	17	29	0.0087	K	ATAGDTHLGGEDFDNR	M					File4264 Spectrum678841 scans: 12436	126/130C	---	127c/130C	---	128c/130C	---	129c/130C	---	131/130C	---	127n/130C	---	128n/130C	---	129n/130C	---
1	1	Pavir.Cb00504.1.p|PACid:30269945	Pavir.Cb00504.1.p|PACid:30269945	4421	82978	238	238	27	27	45.5	5.13	355099	1	0	0	635.636	1903.89	3	1903.89	0.0015	0	28.43	19	29	0.0061	K	ATAGDTHLGGEDFDNR	M					File4264 Spectrum678589 scans: 12161	126/130C	---	127c/130C	---	128c/130C	---	129c/130C	---	131/130C	---	127n/130C	---	128n/130C	---	129n/130C	---
1	1	Pavir.Cb00504.1.p|PACid:30269945	Pavir.Cb00504.1.p|PACid:30269945	4421	82978	238	238	27	27	45.5	5.13	355117	1	0	0	635.637	1903.89	3	1903.89	0.0018	0	24.56	15	29	0.006	K	ATAGDTHLGGEDFDNR	M					File4251 Spectrum138939 scans: 12369	126/130C	---	127c/130C	---	128c/130C	---	129c/130C	---	131/130C	---	127n/130C	---	128n/130C	---	129n/130C	---
1	1	Pavir.Cb00504.1.p|PACid:30269945	Pavir.Cb00504.1.p|PACid:30269945	4421	82978	238	238	27	27	45.5	5.13	355120	1	0	0	952.951	1903.89	2	1903.89	0.002	0	25.57	14	29	0.004	K	ATAGDTHLGGEDFDNR	M					File4264 Spectrum678687 scans: 12267	126/130C	---	127c/130C	---	128c/130C	---	129c/130C	---	131/130C	---	127n/130C	---	128n/130C	---	129n/130C	---
1	1	Pavir.Cb00504.1.p|PACid:30269945	Pavir.Cb00504.1.p|PACid:30269945	4421	82978	238	238	27	27	45.5	5.13	355125	1	0	0	635.637	1903.89	3	1903.89	0.002	0	28.51	18	29	0.0046	K	ATAGDTHLGGEDFDNR	M					File4249 Spectrum81797 scans: 46743	126/130C	---	127c/130C	---	128c/130C	---	129c/130C	---	131/130C	---	127n/130C	---	128n/130C	---	129n/130C	---
1	1	Pavir.Cb00504.1.p|PACid:30269945	Pavir.Cb00504.1.p|PACid:30269945	4421	82978	238	238	27	27	45.5	5.13	355126	1	0	0	635.637	1903.89	3	1903.89	0.002	0	23.11	14	29	0.0068	K	ATAGDTHLGGEDFDNR	M					File4249 Spectrum82164 scans: 47167	126/130C	---	127c/130C	---	128c/130C	---	129c/130C	---	131/130C	---	127n/130C	---	128n/130C	---	129n/130C	---
1	1	Pavir.Cb00504.1.p|PACid:30269945	Pavir.Cb00504.1.p|PACid:30269945	4421	82978	238	238	27	27	45.5	5.13	355137	1	0	0	952.952	1903.89	2	1903.89	0.0023	0	72.14	24	29	8.5e-07	K	ATAGDTHLGGEDFDNR	M					File4249 Spectrum50647 scans: 12237	126/130C	---	127c/130C	---	128c/130C	---	129c/130C	---	131/130C	---	127n/130C	---	128n/130C	---	129n/130C	---
1	1	Pavir.Cb00504.1.p|PACid:30269945	Pavir.Cb00504.1.p|PACid:30269945	4421	82978	238	238	27	27	45.5	5.13	355147	1	0	0	635.637	1903.89	3	1903.89	0.0025	0	29.63	21	29	0.0086	K	ATAGDTHLGGEDFDNR	M					File4249 Spectrum50625 scans: 12212	126/130C	---	127c/130C	---	128c/130C	---	129c/130C	---	131/130C	---	127n/130C	---	128n/130C	---	129n/130C	---
1	1	Pavir.Cb00504.1.p|PACid:30269945	Pavir.Cb00504.1.p|PACid:30269945	4421	82978	238	238	27	27	45.5	5.13	355151	1	0	0	952.952	1903.89	2	1903.89	0.0029	0	23.56	14	29	0.0062	K	ATAGDTHLGGEDFDNR	M					File4249 Spectrum50578 scans: 12158	126/130C	---	127c/130C	---	128c/130C	---	129c/130C	---	131/130C	---	127n/130C	---	128n/130C	---	129n/130C	---
1	1	Pavir.Cb00504.1.p|PACid:30269945	Pavir.Cb00504.1.p|PACid:30269945	4421	82978	238	238	27	27	45.5	5.13	355153	1	0	0	952.952	1903.89	2	1903.89	0.0032	0	26.18	18	29	0.0082	K	ATAGDTHLGGEDFDNR	M					File4255 Spectrum309583 scans: 11602	126/130C	---	127c/130C	---	128c/130C	---	129c/130C	---	131/130C	---	127n/130C	---	128n/130C	---	129n/130C	---
1	1	Pavir.Cb00504.1.p|PACid:30269945	Pavir.Cb00504.1.p|PACid:30269945	4421	82978	238	238	27	27	45.5	5.13	355155	1	0	0	952.952	1903.89	2	1903.89	0.0033	0	46.57	22	29	0.0002	K	ATAGDTHLGGEDFDNR	M					File4249 Spectrum50421 scans: 11981	126/130C	---	127c/130C	---	128c/130C	---	129c/130C	---	131/130C	---	127n/130C	---	128n/130C	---	129n/130C	---
1	1	Pavir.Cb00504.1.p|PACid:30269945	Pavir.Cb00504.1.p|PACid:30269945	4421	82978	238	238	27	27	45.5	5.13	355156	1	0	0	952.952	1903.89	2	1903.89	0.0035	0	49.46	23	29	0.00012	K	ATAGDTHLGGEDFDNR	M					File4264 Spectrum678597 scans: 12169	126/130C	---	127c/130C	---	128c/130C	---	129c/130C	---	131/130C	---	127n/130C	---	128n/130C	---	129n/130C	---
1	1	Pavir.Cb00504.1.p|PACid:30269945	Pavir.Cb00504.1.p|PACid:30269945	4421	82978	238	238	27	27	45.5	5.13	357176	1	0	0	955.503	1908.99	2	1908.99	0.0018	0	50.02	20	33	5.5e-05	K	NAVVTVPAYFNDSQR	Q					File4248 Spectrum20614 scans: 24485	126/130C	---	127c/130C	---	128c/130C	---	129c/130C	---	131/130C	---	127n/130C	---	128n/130C	---	129n/130C	---
1	1	Pavir.Cb00504.1.p|PACid:30269945	Pavir.Cb00504.1.p|PACid:30269945	4421	82978	238	238	27	27	45.5	5.13	357181	1	0	0	955.503	1908.99	2	1908.99	0.0024	0	63.11	30	33	2.5e-05	K	NAVVTVPAYFNDSQR	Q					File4248 Spectrum20373 scans: 24222	126/130C	---	127c/130C	---	128c/130C	---	129c/130C	---	131/130C	---	127n/130C	---	128n/130C	---	129n/130C	---
1	1	Pavir.Cb00504.1.p|PACid:30269945	Pavir.Cb00504.1.p|PACid:30269945	4421	82978	238	238	27	27	45.5	5.13	357187	1	0	0	637.338	1908.99	3	1908.99	0.0031	0	31.81	14	33	0.001	K	NAVVTVPAYFNDSQR	Q					File4248 Spectrum20415 scans: 24268	126/130C	---	127c/130C	---	128c/130C	---	129c/130C	---	131/130C	---	127n/130C	---	128n/130C	---	129n/130C	---
1	1	Pavir.Cb00504.1.p|PACid:30269945	Pavir.Cb00504.1.p|PACid:30269945	4421	82978	238	238	27	27	45.5	5.13	357511	1	0	0	955.995	1909.98	2	1909.97	0.0019	0	29.01	15	33	0.0023	K	NAVVTVPAYFNDSQR	Q	Deamidated (NQ)	0.000000000010000.0			File4252 Spectrum194091 scans: 25874	126/130C	---	127c/130C	---	128c/130C	---	129c/130C	---	131/130C	---	127n/130C	---	128n/130C	---	129n/130C	---
1	1	Pavir.Cb00504.1.p|PACid:30269945	Pavir.Cb00504.1.p|PACid:30269945	4421	82978	238	238	27	27	45.5	5.13	357513	1	0	0	637.666	1909.98	3	1909.97	0.002	0	40.26	16	33	0.0002	K	NAVVTVPAYFNDSQR	Q	Deamidated (NQ)	0.000000000010000.0			File4253 Spectrum236682 scans: 25863	126/130C	---	127c/130C	---	128c/130C	---	129c/130C	---	131/130C	---	127n/130C	---	128n/130C	---	129n/130C	---
1	1	Pavir.Cb00504.1.p|PACid:30269945	Pavir.Cb00504.1.p|PACid:30269945	4421	82978	238	238	27	27	45.5	5.13	413515	1	0	1	686.056	2055.15	3	2055.14	0.0016	1	26.72	16	33	0.0052	K	MREIAEAYLGSTIK	N	Oxidation (M)	0.30000000000000.0			File4260 Spectrum512802 scans: 23633	126/130C	0.845	127c/130C	0.727	128c/130C	0.622	129c/130C	2.086	131/130C	0.865	127n/130C	0.817	128n/130C	0.91	129n/130C	1.493
1	1	Pavir.Cb00504.1.p|PACid:30269945	Pavir.Cb00504.1.p|PACid:30269945	4421	82978	238	238	27	27	45.5	5.13	423388	1	0	1	695.425	2083.25	3	2083.25	0.0009	1	32.27	15	30	0.00094	R	QATKDAGVIAGLNVLR	I					File4250 Spectrum107814 scans: 26385	126/130C	1.346	127c/130C	1.238	128c/130C	0.776	129c/130C	3.255	131/130C	0.936	127n/130C	1.352	128n/130C	1.112	129n/130C	0.737
1	1	Pavir.Cb00504.1.p|PACid:30269945	Pavir.Cb00504.1.p|PACid:30269945	4421	82978	238	238	27	27	45.5	5.13	423389	1	0	1	521.821	2083.25	4	2083.25	0.001	1	27.57	15	30	0.0034	R	QATKDAGVIAGLNVLR	I					File4250 Spectrum107866 scans: 26441	126/130C	1.23	127c/130C	1.158	128c/130C	0.943	129c/130C	2.222	131/130C	1.108	127n/130C	1.205	128n/130C	1.157	129n/130C	0.95
1	1	Pavir.Cb00504.1.p|PACid:30269945	Pavir.Cb00504.1.p|PACid:30269945	4421	82978	238	238	27	27	45.5	5.13	423392	1	0	1	521.821	2083.25	4	2083.25	0.0017	1	26.86	14	30	0.0032	R	QATKDAGVIAGLNVLR	I					File4250 Spectrum108113 scans: 26711	126/130C	1.054	127c/130C	1.194	128c/130C	0.747	129c/130C	1.448	131/130C	1.169	127n/130C	1.015	128n/130C	1.164	129n/130C	0.962
1	1	Pavir.Cb00504.1.p|PACid:30269945	Pavir.Cb00504.1.p|PACid:30269945	4421	82978	238	238	27	27	45.5	5.13	423393	1	0	1	695.425	2083.25	3	2083.25	0.0018	1	33.29	15	30	0.00076	R	QATKDAGVIAGLNVLR	I					File4250 Spectrum108054 scans: 26647	126/130C	0.978	127c/130C	0.939	128c/130C	0.667	129c/130C	3.076	131/130C	1.124	127n/130C	1.073	128n/130C	0.966	129n/130C	0.632
1	1	Pavir.Cb00504.1.p|PACid:30269945	Pavir.Cb00504.1.p|PACid:30269945	4421	82978	238	238	27	27	45.5	5.13	423398	1	0	1	695.426	2083.26	3	2083.25	0.0038	1	24.25	14	29	0.0053	R	QATKDAGVIAGLNVLR	I					File4251 Spectrum153231 scans: 28017	126/130C	0.893	127c/130C	0.731	128c/130C	0.825	129c/130C	1.662	131/130C	0.84	127n/130C	0.805	128n/130C	0.935	129n/130C	0.766
1	1	Pavir.Cb00504.1.p|PACid:30269945	Pavir.Cb00504.1.p|PACid:30269945	4421	82978	238	238	27	27	45.5	5.13	423706	1	0	1	695.753	2084.24	3	2084.24	0.0022	1	30.27	14	30	0.0014	R	QATKDAGVIAGLNVLR	I	Deamidated (NQ)	0.1000000000000000.0			File4261 Spectrum561478 scans: 28471	126/130C	1.497	127c/130C	2.027	128c/130C	1.2	129c/130C	1.451	131/130C	1.459	127n/130C	1.205	128n/130C	0.9	129n/130C	1.22
1	1	Pavir.Cb00504.1.p|PACid:30269945	Pavir.Cb00504.1.p|PACid:30269945	4421	82978	238	238	27	27	45.5	5.13	434546	1	0	0	706.745	2117.21	3	2117.21	0	0	27.74	16	33	0.004	R	IINEPTAAAIAYGLDK	K					File4262 Spectrum613316 scans: 36497	126/130C	---	127c/130C	---	128c/130C	---	129c/130C	---	131/130C	---	127n/130C	---	128n/130C	---	129n/130C	---
1	1	Pavir.Cb00504.1.p|PACid:30269945	Pavir.Cb00504.1.p|PACid:30269945	4421	82978	238	238	27	27	45.5	5.13	434552	1	0	0	706.745	2117.21	3	2117.21	0.0009	0	25.13	14	33	0.0044	R	IINEPTAAAIAYGLDK	K					File4263 Spectrum657457 scans: 36836	126/130C	---	127c/130C	---	128c/130C	---	129c/130C	---	131/130C	---	127n/130C	---	128n/130C	---	129n/130C	---
1	1	Pavir.Cb00504.1.p|PACid:30269945	Pavir.Cb00504.1.p|PACid:30269945	4421	82978	238	238	27	27	45.5	5.13	434557	1	0	0	1059.62	2117.22	2	2117.21	0.0017	0	89.12	26	33	2.9e-08	R	IINEPTAAAIAYGLDK	K					File4263 Spectrum656566 scans: 35811	126/130C	---	127c/130C	---	128c/130C	---	129c/130C	---	131/130C	---	127n/130C	---	128n/130C	---	129n/130C	---
1	1	Pavir.Cb00504.1.p|PACid:30269945	Pavir.Cb00504.1.p|PACid:30269945	4421	82978	238	238	27	27	45.5	5.13	434558	1	0	0	706.746	2117.22	3	2117.21	0.0018	0	28.56	18	33	0.0048	R	IINEPTAAAIAYGLDK	K					File4263 Spectrum657247 scans: 36586	126/130C	---	127c/130C	---	128c/130C	---	129c/130C	---	131/130C	---	127n/130C	---	128n/130C	---	129n/130C	---
1	1	Pavir.Cb00504.1.p|PACid:30269945	Pavir.Cb00504.1.p|PACid:30269945	4421	82978	238	238	27	27	45.5	5.13	434563	1	0	0	706.746	2117.22	3	2117.21	0.0021	0	41.05	23	33	0.00084	R	IINEPTAAAIAYGLDK	K					File4262 Spectrum612447 scans: 35535	126/130C	---	127c/130C	---	128c/130C	---	129c/130C	---	131/130C	---	127n/130C	---	128n/130C	---	129n/130C	---
1	1	Pavir.Cb00504.1.p|PACid:30269945	Pavir.Cb00504.1.p|PACid:30269945	4421	82978	238	238	27	27	45.5	5.13	434564	1	0	0	706.746	2117.22	3	2117.21	0.0021	0	27.8	17	33	0.005	R	IINEPTAAAIAYGLDK	K					File4264 Spectrum699868 scans: 35324	126/130C	---	127c/130C	---	128c/130C	---	129c/130C	---	131/130C	---	127n/130C	---	128n/130C	---	129n/130C	---
1	1	Pavir.Cb00504.1.p|PACid:30269945	Pavir.Cb00504.1.p|PACid:30269945	4421	82978	238	238	27	27	45.5	5.13	434568	1	0	0	706.746	2117.22	3	2117.21	0.0023	0	30.93	22	33	0.007	R	IINEPTAAAIAYGLDK	K					File4263 Spectrum657027 scans: 36335	126/130C	---	127c/130C	---	128c/130C	---	129c/130C	---	131/130C	---	127n/130C	---	128n/130C	---	129n/130C	---
1	1	Pavir.Cb00504.1.p|PACid:30269945	Pavir.Cb00504.1.p|PACid:30269945	4421	82978	238	238	27	27	45.5	5.13	434569	1	0	0	706.746	2117.22	3	2117.21	0.0023	0	37.09	21	33	0.0013	R	IINEPTAAAIAYGLDK	K					File4263 Spectrum656808 scans: 36086	126/130C	---	127c/130C	---	128c/130C	---	129c/130C	---	131/130C	---	127n/130C	---	128n/130C	---	129n/130C	---
1	1	Pavir.Cb00504.1.p|PACid:30269945	Pavir.Cb00504.1.p|PACid:30269945	4421	82978	238	238	27	27	45.5	5.13	434571	1	0	0	706.746	2117.22	3	2117.21	0.0025	0	36.61	17	33	0.00056	R	IINEPTAAAIAYGLDK	K					File4263 Spectrum656356 scans: 35571	126/130C	---	127c/130C	---	128c/130C	---	129c/130C	---	131/130C	---	127n/130C	---	128n/130C	---	129n/130C	---
1	1	Pavir.Cb00504.1.p|PACid:30269945	Pavir.Cb00504.1.p|PACid:30269945	4421	82978	238	238	27	27	45.5	5.13	434580	1	0	0	1059.62	2117.22	2	2117.21	0.0039	0	55.29	27	33	7.5e-05	R	IINEPTAAAIAYGLDK	K					File4262 Spectrum612488 scans: 35580	126/130C	---	127c/130C	---	128c/130C	---	129c/130C	---	131/130C	---	127n/130C	---	128n/130C	---	129n/130C	---
1	1	Pavir.Cb00504.1.p|PACid:30269945	Pavir.Cb00504.1.p|PACid:30269945	4421	82978	238	238	27	27	45.5	5.13	434581	1	0	0	706.746	2117.22	3	2117.21	0.004	0	36.39	18	33	0.00079	R	IINEPTAAAIAYGLDK	K					File4263 Spectrum656581 scans: 35828	126/130C	---	127c/130C	---	128c/130C	---	129c/130C	---	131/130C	---	127n/130C	---	128n/130C	---	129n/130C	---
1	1	Pavir.Cb00504.1.p|PACid:30269945	Pavir.Cb00504.1.p|PACid:30269945	4421	82978	238	238	27	27	45.5	5.13	434582	1	0	0	706.746	2117.22	3	2117.21	0.004	0	35.95	16	33	0.00054	R	IINEPTAAAIAYGLDK	K					File4249 Spectrum71622 scans: 35126	126/130C	---	127c/130C	---	128c/130C	---	129c/130C	---	131/130C	---	127n/130C	---	128n/130C	---	129n/130C	---
1	1	Pavir.Cb00504.1.p|PACid:30269945	Pavir.Cb00504.1.p|PACid:30269945	4421	82978	238	238	27	27	45.5	5.13	434587	1	0	0	1059.62	2117.22	2	2117.21	0.0061	0	42.64	26	33	0.0011	R	IINEPTAAAIAYGLDK	K					File4262 Spectrum612243 scans: 35310	126/130C	---	127c/130C	---	128c/130C	---	129c/130C	---	131/130C	---	127n/130C	---	128n/130C	---	129n/130C	---
1	1	Pavir.Cb00504.1.p|PACid:30269945	Pavir.Cb00504.1.p|PACid:30269945	4421	82978	238	238	27	27	45.5	5.13	435104	1	0	0	1060.58	2119.15	2	2119.15	0.0013	0	28.83	19	34	0.0059	K	NQVAMNPINTVFDAK	R					File4263 Spectrum652843 scans: 31630	126/130C	---	127c/130C	---	128c/130C	---	129c/130C	---	131/130C	---	127n/130C	---	128n/130C	---	129n/130C	---
1	1	Pavir.Cb00504.1.p|PACid:30269945	Pavir.Cb00504.1.p|PACid:30269945	4421	82978	238	238	27	27	45.5	5.13	435106	1	0	0	707.391	2119.15	3	2119.15	0.0021	0	26.73	19	34	0.009	K	NQVAMNPINTVFDAK	R					File4264 Spectrum696164 scans: 31269	126/130C	---	127c/130C	---	128c/130C	---	129c/130C	---	131/130C	---	127n/130C	---	128n/130C	---	129n/130C	---
1	1	Pavir.Cb00504.1.p|PACid:30269945	Pavir.Cb00504.1.p|PACid:30269945	4421	82978	238	238	27	27	45.5	5.13	440064	1	0	0	1068.58	2135.15	2	2135.15	0	0	36.95	25	34	0.004	K	NQVAMNPINTVFDAK	R	Oxidation (M)	0.000030000000000.0			File4260 Spectrum516860 scans: 28055	126/130C	---	127c/130C	---	128c/130C	---	129c/130C	---	131/130C	---	127n/130C	---	128n/130C	---	129n/130C	---
1	1	Pavir.Cb00504.1.p|PACid:30269945	Pavir.Cb00504.1.p|PACid:30269945	4421	82978	238	238	27	27	45.5	5.13	440070	1	0	0	712.723	2135.15	3	2135.15	0.0011	0	28.57	20	34	0.0081	K	NQVAMNPINTVFDAK	R	Oxidation (M)	0.000030000000000.0			File4260 Spectrum516450 scans: 27608	126/130C	---	127c/130C	---	128c/130C	---	129c/130C	---	131/130C	---	127n/130C	---	128n/130C	---	129n/130C	---
1	1	Pavir.Cb00504.1.p|PACid:30269945	Pavir.Cb00504.1.p|PACid:30269945	4421	82978	238	238	27	27	45.5	5.13	440071	1	0	0	712.723	2135.15	3	2135.15	0.0011	0	30.1	16	34	0.002	K	NQVAMNPINTVFDAK	R	Oxidation (M)	0.000030000000000.0			File4260 Spectrum516952 scans: 28155	126/130C	---	127c/130C	---	128c/130C	---	129c/130C	---	131/130C	---	127n/130C	---	128n/130C	---	129n/130C	---
1	1	Pavir.Cb00504.1.p|PACid:30269945	Pavir.Cb00504.1.p|PACid:30269945	4421	82978	238	238	27	27	45.5	5.13	440076	1	0	0	712.723	2135.15	3	2135.15	0.0016	0	31.39	16	34	0.0015	K	NQVAMNPINTVFDAK	R	Oxidation (M)	0.000030000000000.0			File4263 Spectrum649541 scans: 27983	126/130C	---	127c/130C	---	128c/130C	---	129c/130C	---	131/130C	---	127n/130C	---	128n/130C	---	129n/130C	---
1	1	Pavir.Cb00504.1.p|PACid:30269945	Pavir.Cb00504.1.p|PACid:30269945	4421	82978	238	238	27	27	45.5	5.13	440077	1	0	0	712.723	2135.15	3	2135.15	0.0016	0	30.58	19	34	0.0036	K	NQVAMNPINTVFDAK	R	Oxidation (M)	0.000030000000000.0			File4259 Spectrum474005 scans: 28322	126/130C	---	127c/130C	---	128c/130C	---	129c/130C	---	131/130C	---	127n/130C	---	128n/130C	---	129n/130C	---
1	1	Pavir.Cb00504.1.p|PACid:30269945	Pavir.Cb00504.1.p|PACid:30269945	4421	82978	238	238	27	27	45.5	5.13	440079	1	0	0	712.723	2135.15	3	2135.15	0.0018	0	30.98	19	34	0.0034	K	NQVAMNPINTVFDAK	R	Oxidation (M)	0.000030000000000.0			File4264 Spectrum692772 scans: 27577	126/130C	---	127c/130C	---	128c/130C	---	129c/130C	---	131/130C	---	127n/130C	---	128n/130C	---	129n/130C	---
1	1	Pavir.Cb00504.1.p|PACid:30269945	Pavir.Cb00504.1.p|PACid:30269945	4421	82978	238	238	27	27	45.5	5.13	440082	1	0	0	712.723	2135.15	3	2135.15	0.002	0	45.21	22	34	0.00028	K	NQVAMNPINTVFDAK	R	Oxidation (M)	0.000030000000000.0			File4263 Spectrum649615 scans: 28063	126/130C	---	127c/130C	---	128c/130C	---	129c/130C	---	131/130C	---	127n/130C	---	128n/130C	---	129n/130C	---
1	1	Pavir.Cb00504.1.p|PACid:30269945	Pavir.Cb00504.1.p|PACid:30269945	4421	82978	238	238	27	27	45.5	5.13	440083	1	0	0	1068.58	2135.15	2	2135.15	0.002	0	43.34	19	34	0.00019	K	NQVAMNPINTVFDAK	R	Oxidation (M)	0.000030000000000.0			File4259 Spectrum473961 scans: 28273	126/130C	---	127c/130C	---	128c/130C	---	129c/130C	---	131/130C	---	127n/130C	---	128n/130C	---	129n/130C	---
1	1	Pavir.Cb00504.1.p|PACid:30269945	Pavir.Cb00504.1.p|PACid:30269945	4421	82978	238	238	27	27	45.5	5.13	440085	1	0	0	712.723	2135.15	3	2135.15	0.0022	0	24.28	16	34	0.0093	K	NQVAMNPINTVFDAK	R	Oxidation (M)	0.000030000000000.0			File4263 Spectrum649291 scans: 27709	126/130C	---	127c/130C	---	128c/130C	---	129c/130C	---	131/130C	---	127n/130C	---	128n/130C	---	129n/130C	---
1	1	Pavir.Cb00504.1.p|PACid:30269945	Pavir.Cb00504.1.p|PACid:30269945	4421	82978	238	238	27	27	45.5	5.13	440088	1	0	0	1068.58	2135.15	2	2135.15	0.0022	0	61.57	29	34	3.3e-05	K	NQVAMNPINTVFDAK	R	Oxidation (M)	0.000030000000000.0			File4264 Spectrum693010 scans: 27836	126/130C	---	127c/130C	---	128c/130C	---	129c/130C	---	131/130C	---	127n/130C	---	128n/130C	---	129n/130C	---
1	1	Pavir.Cb00504.1.p|PACid:30269945	Pavir.Cb00504.1.p|PACid:30269945	4421	82978	238	238	27	27	45.5	5.13	440090	1	0	0	712.723	2135.15	3	2135.15	0.0023	0	32.96	21	34	0.0032	K	NQVAMNPINTVFDAK	R	Oxidation (M)	0.000030000000000.0			File4259 Spectrum473902 scans: 28207	126/130C	---	127c/130C	---	128c/130C	---	129c/130C	---	131/130C	---	127n/130C	---	128n/130C	---	129n/130C	---
1	1	Pavir.Cb00504.1.p|PACid:30269945	Pavir.Cb00504.1.p|PACid:30269945	4421	82978	238	238	27	27	45.5	5.13	440093	1	0	0	1068.58	2135.15	2	2135.15	0.0025	0	55.42	24	34	3.8e-05	K	NQVAMNPINTVFDAK	R	Oxidation (M)	0.000030000000000.0			File4263 Spectrum649485 scans: 27921	126/130C	---	127c/130C	---	128c/130C	---	129c/130C	---	131/130C	---	127n/130C	---	128n/130C	---	129n/130C	---
1	1	Pavir.Cb00504.1.p|PACid:30269945	Pavir.Cb00504.1.p|PACid:30269945	4421	82978	238	238	27	27	45.5	5.13	440094	1	0	0	1068.58	2135.15	2	2135.15	0.0025	0	59.23	23	34	1.2e-05	K	NQVAMNPINTVFDAK	R	Oxidation (M)	0.000030000000000.0			File4260 Spectrum516617 scans: 27790	126/130C	---	127c/130C	---	128c/130C	---	129c/130C	---	131/130C	---	127n/130C	---	128n/130C	---	129n/130C	---
1	1	Pavir.Cb00504.1.p|PACid:30269945	Pavir.Cb00504.1.p|PACid:30269945	4421	82978	238	238	27	27	45.5	5.13	440096	1	0	0	712.723	2135.15	3	2135.15	0.0025	0	29.05	16	34	0.0028	K	NQVAMNPINTVFDAK	R	Oxidation (M)	0.000030000000000.0			File4259 Spectrum474130 scans: 28461	126/130C	---	127c/130C	---	128c/130C	---	129c/130C	---	131/130C	---	127n/130C	---	128n/130C	---	129n/130C	---
1	1	Pavir.Cb00504.1.p|PACid:30269945	Pavir.Cb00504.1.p|PACid:30269945	4421	82978	238	238	27	27	45.5	5.13	440097	1	0	0	712.723	2135.15	3	2135.15	0.0025	0	28.48	15	34	0.0026	K	NQVAMNPINTVFDAK	R	Oxidation (M)	0.000030000000000.0			File4264 Spectrum693277 scans: 28127	126/130C	---	127c/130C	---	128c/130C	---	129c/130C	---	131/130C	---	127n/130C	---	128n/130C	---	129n/130C	---
1	1	Pavir.Cb00504.1.p|PACid:30269945	Pavir.Cb00504.1.p|PACid:30269945	4421	82978	238	238	27	27	45.5	5.13	440104	1	0	0	712.723	2135.15	3	2135.15	0.0029	0	45.72	21	34	0.00017	K	NQVAMNPINTVFDAK	R	Oxidation (M)	0.000030000000000.0			File4260 Spectrum516699 scans: 27879	126/130C	---	127c/130C	---	128c/130C	---	129c/130C	---	131/130C	---	127n/130C	---	128n/130C	---	129n/130C	---
1	1	Pavir.Cb00504.1.p|PACid:30269945	Pavir.Cb00504.1.p|PACid:30269945	4421	82978	238	238	27	27	45.5	5.13	440113	1	0	0	1068.58	2135.15	2	2135.15	0.0044	0	30.97	18	34	0.0027	K	NQVAMNPINTVFDAK	R	Oxidation (M)	0.000030000000000.0			File4264 Spectrum693271 scans: 28121	126/130C	---	127c/130C	---	128c/130C	---	129c/130C	---	131/130C	---	127n/130C	---	128n/130C	---	129n/130C	---
1	1	Pavir.Cb00504.1.p|PACid:30269945	Pavir.Cb00504.1.p|PACid:30269945	4421	82978	238	238	27	27	45.5	5.13	440380	1	0	0	713.051	2136.13	3	2136.13	0.0018	0	28.99	18	34	0.0043	K	NQVAMNPINTVFDAK	R	Deamidated (NQ); Oxidation (M)	0.100030000000000.0			File4259 Spectrum475279 scans: 29748	126/130C	---	127c/130C	---	128c/130C	---	129c/130C	---	131/130C	---	127n/130C	---	128n/130C	---	129n/130C	---
1	1	Pavir.Cb00504.1.p|PACid:30269945	Pavir.Cb00504.1.p|PACid:30269945	4421	82978	238	238	27	27	45.5	5.13	440382	1	0	0	713.051	2136.13	3	2136.13	0.0025	0	31.76	21	34	0.0051	K	NQVAMNPINTVFDAK	R	Deamidated (NQ); Oxidation (M)	0.010030000000000.0			File4259 Spectrum475010 scans: 29445	126/130C	---	127c/130C	---	128c/130C	---	129c/130C	---	131/130C	---	127n/130C	---	128n/130C	---	129n/130C	---
1	1	Pavir.Cb00504.1.p|PACid:30269945	Pavir.Cb00504.1.p|PACid:30269945	4421	82978	238	238	27	27	45.5	5.13	440384	1	0	0	713.051	2136.13	3	2136.13	0.0027	0	25.64	17	34	0.0076	K	NQVAMNPINTVFDAK	R	Deamidated (NQ); Oxidation (M)	0.100030000000000.0			File4259 Spectrum475506 scans: 30003	126/130C	---	127c/130C	---	128c/130C	---	129c/130C	---	131/130C	---	127n/130C	---	128n/130C	---	129n/130C	---
1	1	Pavir.Cb00504.1.p|PACid:30269945	Pavir.Cb00504.1.p|PACid:30269945	4421	82978	238	238	27	27	45.5	5.13	440385	1	0	0	713.051	2136.13	3	2136.13	0.0027	0	27.99	17	34	0.0043	K	NQVAMNPINTVFDAK	R	Deamidated (NQ); Oxidation (M)	0.100030000000000.0			File4248 Spectrum23953 scans: 28142	126/130C	---	127c/130C	---	128c/130C	---	129c/130C	---	131/130C	---	127n/130C	---	128n/130C	---	129n/130C	---
1	1	Pavir.Cb00504.1.p|PACid:30269945	Pavir.Cb00504.1.p|PACid:30269945	4421	82978	238	238	27	27	45.5	5.13	440391	1	0	0	713.052	2136.13	3	2136.13	0.0042	0	28.98	17	34	0.0034	K	NQVAMNPINTVFDAK	R	Deamidated (NQ); Oxidation (M)	0.100030000000000.0			File4258 Spectrum431654 scans: 29799	126/130C	---	127c/130C	---	128c/130C	---	129c/130C	---	131/130C	---	127n/130C	---	128n/130C	---	129n/130C	---
1	1	Pavir.Cb00504.1.p|PACid:30269945	Pavir.Cb00504.1.p|PACid:30269945	4421	82978	238	238	27	27	45.5	5.13	482379	1	0	0	759.425	2275.25	3	2275.25	0.0019	1	50.39	16	34	1.9e-05	K	NQVAMNPINTVFDAKR	L					File4253 Spectrum238090 scans: 27415	126/130C	---	127c/130C	---	128c/130C	---	129c/130C	---	131/130C	---	127n/130C	---	128n/130C	---	129n/130C	---
1	1	Pavir.Cb00504.1.p|PACid:30269945	Pavir.Cb00504.1.p|PACid:30269945	4421	82978	238	238	27	27	45.5	5.13	482380	1	0	0	759.425	2275.25	3	2275.25	0.0021	1	47.28	20	34	0.0001	K	NQVAMNPINTVFDAKR	L					File4253 Spectrum238024 scans: 27342	126/130C	---	127c/130C	---	128c/130C	---	129c/130C	---	131/130C	---	127n/130C	---	128n/130C	---	129n/130C	---
1	1	Pavir.Cb00504.1.p|PACid:30269945	Pavir.Cb00504.1.p|PACid:30269945	4421	82978	238	238	27	27	45.5	5.13	482383	1	0	0	759.425	2275.25	3	2275.25	0.0023	1	35.39	15	34	0.00054	K	NQVAMNPINTVFDAKR	L					File4253 Spectrum237603 scans: 26875	126/130C	---	127c/130C	---	128c/130C	---	129c/130C	---	131/130C	---	127n/130C	---	128n/130C	---	129n/130C	---
1	1	Pavir.Cb00504.1.p|PACid:30269945	Pavir.Cb00504.1.p|PACid:30269945	4421	82978	238	238	27	27	45.5	5.13	482385	1	0	0	759.425	2275.25	3	2275.25	0.0023	1	35.47	18	34	0.00098	K	NQVAMNPINTVFDAKR	L					File4252 Spectrum195462 scans: 27385	126/130C	---	127c/130C	---	128c/130C	---	129c/130C	---	131/130C	---	127n/130C	---	128n/130C	---	129n/130C	---
1	1	Pavir.Cb00504.1.p|PACid:30269945	Pavir.Cb00504.1.p|PACid:30269945	4421	82978	238	238	27	27	45.5	5.13	482386	1	0	0	759.425	2275.25	3	2275.25	0.0024	1	35.32	15	34	0.00049	K	NQVAMNPINTVFDAKR	L					File4253 Spectrum237841 scans: 27139	126/130C	---	127c/130C	---	128c/130C	---	129c/130C	---	131/130C	---	127n/130C	---	128n/130C	---	129n/130C	---
1	1	Pavir.Cb00504.1.p|PACid:30269945	Pavir.Cb00504.1.p|PACid:30269945	4421	82978	238	238	27	27	45.5	5.13	482389	1	0	0	759.426	2275.25	3	2275.25	0.0034	1	38.72	15	34	0.00023	K	NQVAMNPINTVFDAKR	L					File4252 Spectrum195220 scans: 27115	126/130C	---	127c/130C	---	128c/130C	---	129c/130C	---	131/130C	---	127n/130C	---	128n/130C	---	129n/130C	---
1	1	Pavir.Cb00504.1.p|PACid:30269945	Pavir.Cb00504.1.p|PACid:30269945	4421	82978	238	238	27	27	45.5	5.13	482393	1	0	0	759.426	2275.26	3	2275.25	0.0037	1	27.86	17	34	0.0045	K	NQVAMNPINTVFDAKR	L					File4252 Spectrum195699 scans: 27649	126/130C	---	127c/130C	---	128c/130C	---	129c/130C	---	131/130C	---	127n/130C	---	128n/130C	---	129n/130C	---
1	1	Pavir.Cb00504.1.p|PACid:30269945	Pavir.Cb00504.1.p|PACid:30269945	4421	82978	238	238	27	27	45.5	5.13	486905	1	0	0	764.756	2291.25	3	2291.25	0.0009	1	30.29	21	34	0.0061	K	NQVAMNPINTVFDAKR	L	Oxidation (M)	0.0000300000000000.0			File4249 Spectrum60831 scans: 23351	126/130C	---	127c/130C	---	128c/130C	---	129c/130C	---	131/130C	---	127n/130C	---	128n/130C	---	129n/130C	---
1	1	Pavir.Cb00504.1.p|PACid:30269945	Pavir.Cb00504.1.p|PACid:30269945	4421	82978	238	238	27	27	45.5	5.13	486906	1	0	0	764.756	2291.25	3	2291.25	0.0011	1	30.63	16	34	0.0018	K	NQVAMNPINTVFDAKR	L	Oxidation (M)	0.0000300000000000.0			File4264 Spectrum689382 scans: 23897	126/130C	---	127c/130C	---	128c/130C	---	129c/130C	---	131/130C	---	127n/130C	---	128n/130C	---	129n/130C	---
1	1	Pavir.Cb00504.1.p|PACid:30269945	Pavir.Cb00504.1.p|PACid:30269945	4421	82978	238	238	27	27	45.5	5.13	486910	1	0	0	764.757	2291.25	3	2291.25	0.002	1	30.29	17	34	0.0028	K	NQVAMNPINTVFDAKR	L	Oxidation (M)	0.0000300000000000.0			File4252 Spectrum191966 scans: 23548	126/130C	---	127c/130C	---	128c/130C	---	129c/130C	---	131/130C	---	127n/130C	---	128n/130C	---	129n/130C	---
1	1	Pavir.Cb00504.1.p|PACid:30269945	Pavir.Cb00504.1.p|PACid:30269945	4421	82978	238	238	27	27	45.5	5.13	486912	1	0	0	573.819	2291.25	4	2291.25	0.0023	1	25	16	34	0.0063	K	NQVAMNPINTVFDAKR	L	Oxidation (M)	0.0000300000000000.0			File4249 Spectrum61212 scans: 23764	126/130C	---	127c/130C	---	128c/130C	---	129c/130C	---	131/130C	---	127n/130C	---	128n/130C	---	129n/130C	---
1	1	Pavir.Cb00504.1.p|PACid:30269945	Pavir.Cb00504.1.p|PACid:30269945	4421	82978	238	238	27	27	45.5	5.13	486914	1	0	0	764.757	2291.25	3	2291.25	0.0025	1	38.62	16	34	0.00032	K	NQVAMNPINTVFDAKR	L	Oxidation (M)	0.0000300000000000.0			File4249 Spectrum61087 scans: 23629	126/130C	---	127c/130C	---	128c/130C	---	129c/130C	---	131/130C	---	127n/130C	---	128n/130C	---	129n/130C	---
1	1	Pavir.Cb00504.1.p|PACid:30269945	Pavir.Cb00504.1.p|PACid:30269945	4421	82978	238	238	27	27	45.5	5.13	486916	1	0	0	764.757	2291.25	3	2291.25	0.0027	1	38.83	25	34	0.0025	K	NQVAMNPINTVFDAKR	L	Oxidation (M)	0.0000300000000000.0			File4252 Spectrum192207 scans: 23812	126/130C	---	127c/130C	---	128c/130C	---	129c/130C	---	131/130C	---	127n/130C	---	128n/130C	---	129n/130C	---
1	1	Pavir.Cb00504.1.p|PACid:30269945	Pavir.Cb00504.1.p|PACid:30269945	4421	82978	238	238	27	27	45.5	5.13	486917	1	0	0	573.819	2291.25	4	2291.25	0.0028	1	34.55	20	34	0.002	K	NQVAMNPINTVFDAKR	L	Oxidation (M)	0.0000300000000000.0			File4249 Spectrum60948 scans: 23478	126/130C	---	127c/130C	---	128c/130C	---	129c/130C	---	131/130C	---	127n/130C	---	128n/130C	---	129n/130C	---
1	1	Pavir.Cb00504.1.p|PACid:30269945	Pavir.Cb00504.1.p|PACid:30269945	4421	82978	238	238	27	27	45.5	5.13	487166	1	0	0	765.084	2292.23	3	2292.23	0.0009	1	31.94	22	34	0.0055	K	NQVAMNPINTVFDAKR	L	Deamidated (NQ); Oxidation (M)	0.1000300000000000.0			File4264 Spectrum691109 scans: 25770	126/130C	---	127c/130C	---	128c/130C	---	129c/130C	---	131/130C	---	127n/130C	---	128n/130C	---	129n/130C	---
1	1	Pavir.Cb00504.1.p|PACid:30269945	Pavir.Cb00504.1.p|PACid:30269945	4421	82978	238	238	27	27	45.5	5.13	487168	1	0	0	765.085	2292.23	3	2292.23	0.002	1	38.2	20	34	0.00087	K	NQVAMNPINTVFDAKR	L	Deamidated (NQ); Oxidation (M)	0.1000300000000000.0			File4260 Spectrum514554 scans: 25540	126/130C	---	127c/130C	---	128c/130C	---	129c/130C	---	131/130C	---	127n/130C	---	128n/130C	---	129n/130C	---
1	1	Pavir.Cb00504.1.p|PACid:30269945	Pavir.Cb00504.1.p|PACid:30269945	4421	82978	238	238	27	27	45.5	5.13	534108	1	0	0	825.832	2474.47	3	2474.47	0.0013	1	43.98		30	0.0023	R	IINEPTAAAIAYGLDKK	A					File4253 Spectrum245096 scans: 35218	126/130C	---	127c/130C	---	128c/130C	---	129c/130C	---	131/130C	---	127n/130C	---	128n/130C	---	129n/130C	---
1	1	Pavir.Cb00504.1.p|PACid:30269945	Pavir.Cb00504.1.p|PACid:30269945	4421	82978	238	238	27	27	45.5	5.13	534110	1	0	0	619.625	2474.47	4	2474.47	0.0014	1	25.86	18	30	0.0083	R	IINEPTAAAIAYGLDKK	A					File4253 Spectrum245292 scans: 35441	126/130C	---	127c/130C	---	128c/130C	---	129c/130C	---	131/130C	---	127n/130C	---	128n/130C	---	129n/130C	---
1	1	Pavir.Cb00504.1.p|PACid:30269945	Pavir.Cb00504.1.p|PACid:30269945	4421	82978	238	238	27	27	45.5	5.13	534117	1	0	0	619.626	2474.47	4	2474.47	0.0017	1	26.76	17	30	0.0054	R	IINEPTAAAIAYGLDKK	A					File4255 Spectrum329280 scans: 33112	126/130C	---	127c/130C	---	128c/130C	---	129c/130C	---	131/130C	---	127n/130C	---	128n/130C	---	129n/130C	---
1	1	Pavir.Cb00504.1.p|PACid:30269945	Pavir.Cb00504.1.p|PACid:30269945	4421	82978	238	238	27	27	45.5	5.13	534125	1	0	0	825.832	2474.47	3	2474.47	0.0021	1	38.2	30	30	0.0085	R	IINEPTAAAIAYGLDKK	A					File4253 Spectrum245541 scans: 35729	126/130C	---	127c/130C	---	128c/130C	---	129c/130C	---	131/130C	---	127n/130C	---	128n/130C	---	129n/130C	---
1	1	Pavir.Cb00504.1.p|PACid:30269945	Pavir.Cb00504.1.p|PACid:30269945	4421	82978	238	238	27	27	45.5	5.13	534129	1	0	0	619.626	2474.47	4	2474.47	0.0022	1	27.8	14	30	0.0025	R	IINEPTAAAIAYGLDKK	A					File4254 Spectrum288468 scans: 35663	126/130C	---	127c/130C	---	128c/130C	---	129c/130C	---	131/130C	---	127n/130C	---	128n/130C	---	129n/130C	---
1	1	Pavir.Cb00504.1.p|PACid:30269945	Pavir.Cb00504.1.p|PACid:30269945	4421	82978	238	238	27	27	45.5	5.13	534134	1	0	0	825.832	2474.47	3	2474.47	0.0023	1	55.72		30	0.00015	R	IINEPTAAAIAYGLDKK	A					File4253 Spectrum245319 scans: 35473	126/130C	---	127c/130C	---	128c/130C	---	129c/130C	---	131/130C	---	127n/130C	---	128n/130C	---	129n/130C	---
1	1	Pavir.Cb00504.1.p|PACid:30269945	Pavir.Cb00504.1.p|PACid:30269945	4421	82978	238	238	27	27	45.5	5.13	534135	1	0	0	825.832	2474.47	3	2474.47	0.0023	1	48.75		30	0.00076	R	IINEPTAAAIAYGLDKK	A					File4253 Spectrum244866 scans: 34957	126/130C	---	127c/130C	---	128c/130C	---	129c/130C	---	131/130C	---	127n/130C	---	128n/130C	---	129n/130C	---
1	1	Pavir.Cb00504.1.p|PACid:30269945	Pavir.Cb00504.1.p|PACid:30269945	4421	82978	238	238	27	27	45.5	5.13	534136	1	0	0	825.832	2474.47	3	2474.47	0.0023	1	47.69		30	0.00098	R	IINEPTAAAIAYGLDKK	A					File4254 Spectrum288171 scans: 35326	126/130C	---	127c/130C	---	128c/130C	---	129c/130C	---	131/130C	---	127n/130C	---	128n/130C	---	129n/130C	---
1	1	Pavir.Cb00504.1.p|PACid:30269945	Pavir.Cb00504.1.p|PACid:30269945	4421	82978	238	238	27	27	45.5	5.13	534143	1	0	0	825.832	2474.47	3	2474.47	0.0024	1	39.05	26	30	0.0027	R	IINEPTAAAIAYGLDKK	A					File4253 Spectrum244174 scans: 34172	126/130C	---	127c/130C	---	128c/130C	---	129c/130C	---	131/130C	---	127n/130C	---	128n/130C	---	129n/130C	---
1	1	Pavir.Cb00504.1.p|PACid:30269945	Pavir.Cb00504.1.p|PACid:30269945	4421	82978	238	238	27	27	45.5	5.13	534147	1	0	0	825.832	2474.47	3	2474.47	0.0026	1	37.02	23	30	0.0023	R	IINEPTAAAIAYGLDKK	A					File4254 Spectrum288415 scans: 35603	126/130C	---	127c/130C	---	128c/130C	---	129c/130C	---	131/130C	---	127n/130C	---	128n/130C	---	129n/130C	---
1	1	Pavir.Cb00504.1.p|PACid:30269945	Pavir.Cb00504.1.p|PACid:30269945	4421	82978	238	238	27	27	45.5	5.13	534148	1	0	0	825.832	2474.47	3	2474.47	0.0026	1	48.89		30	0.00074	R	IINEPTAAAIAYGLDKK	A					File4254 Spectrum287940 scans: 35065	126/130C	---	127c/130C	---	128c/130C	---	129c/130C	---	131/130C	---	127n/130C	---	128n/130C	---	129n/130C	---
1	1	Pavir.Cb00504.1.p|PACid:30269945	Pavir.Cb00504.1.p|PACid:30269945	4421	82978	238	238	27	27	45.5	5.13	534149	1	0	0	825.832	2474.47	3	2474.47	0.0026	1	43.76	25	30	0.00074	R	IINEPTAAAIAYGLDKK	A					File4254 Spectrum287241 scans: 34274	126/130C	---	127c/130C	---	128c/130C	---	129c/130C	---	131/130C	---	127n/130C	---	128n/130C	---	129n/130C	---
1	1	Pavir.Cb00504.1.p|PACid:30269945	Pavir.Cb00504.1.p|PACid:30269945	4421	82978	238	238	27	27	45.5	5.13	534155	1	0	0	619.626	2474.47	4	2474.47	0.0029	1	29.28	14	30	0.0018	R	IINEPTAAAIAYGLDKK	A					File4253 Spectrum246194 scans: 36483	126/130C	---	127c/130C	---	128c/130C	---	129c/130C	---	131/130C	---	127n/130C	---	128n/130C	---	129n/130C	---
1	1	Pavir.Cb00504.1.p|PACid:30269945	Pavir.Cb00504.1.p|PACid:30269945	4421	82978	238	238	27	27	45.5	5.13	534161	1	0	0	825.832	2474.47	3	2474.47	0.003	1	45.42		30	0.0016	R	IINEPTAAAIAYGLDKK	A					File4254 Spectrum288642 scans: 35862	126/130C	---	127c/130C	---	128c/130C	---	129c/130C	---	131/130C	---	127n/130C	---	128n/130C	---	129n/130C	---
1	1	Pavir.Cb00504.1.p|PACid:30269945	Pavir.Cb00504.1.p|PACid:30269945	4421	82978	238	238	27	27	45.5	5.13	534162	1	0	0	825.832	2474.47	3	2474.47	0.003	1	50.42	28	30	0.00033	R	IINEPTAAAIAYGLDKK	A					File4253 Spectrum244640 scans: 34701	126/130C	---	127c/130C	---	128c/130C	---	129c/130C	---	131/130C	---	127n/130C	---	128n/130C	---	129n/130C	---
1	1	Pavir.Cb00504.1.p|PACid:30269945	Pavir.Cb00504.1.p|PACid:30269945	4421	82978	238	238	27	27	45.5	5.13	534166	1	0	0	619.626	2474.47	4	2474.47	0.0032	1	25.78	14	30	0.0038	R	IINEPTAAAIAYGLDKK	A					File4254 Spectrum288242 scans: 35406	126/130C	---	127c/130C	---	128c/130C	---	129c/130C	---	131/130C	---	127n/130C	---	128n/130C	---	129n/130C	---
1	1	Pavir.Cb00504.1.p|PACid:30269945	Pavir.Cb00504.1.p|PACid:30269945	4421	82978	238	238	27	27	45.5	5.13	534167	1	0	0	619.626	2474.47	4	2474.47	0.0032	1	27.05	15	30	0.0032	R	IINEPTAAAIAYGLDKK	A					File4254 Spectrum288011 scans: 35144	126/130C	---	127c/130C	---	128c/130C	---	129c/130C	---	131/130C	---	127n/130C	---	128n/130C	---	129n/130C	---
1	1	Pavir.Cb00504.1.p|PACid:30269945	Pavir.Cb00504.1.p|PACid:30269945	4421	82978	238	238	27	27	45.5	5.13	534180	1	0	0	619.626	2474.48	4	2474.47	0.0036	1	24	14	30	0.0056	R	IINEPTAAAIAYGLDKK	A					File4254 Spectrum287304 scans: 34345	126/130C	---	127c/130C	---	128c/130C	---	129c/130C	---	131/130C	---	127n/130C	---	128n/130C	---	129n/130C	---
1	1	Pavir.Cb00504.1.p|PACid:30269945	Pavir.Cb00504.1.p|PACid:30269945	4421	82978	238	238	27	27	45.5	5.13	534183	1	0	0	825.832	2474.48	3	2474.47	0.0037	1	40.95	26	30	0.0019	R	IINEPTAAAIAYGLDKK	A					File4253 Spectrum244408 scans: 34438	126/130C	---	127c/130C	---	128c/130C	---	129c/130C	---	131/130C	---	127n/130C	---	128n/130C	---	129n/130C	---
1	1	Pavir.Cb00504.1.p|PACid:30269945	Pavir.Cb00504.1.p|PACid:30269945	4421	82978	238	238	27	27	45.5	5.13	534184	1	0	0	825.832	2474.48	3	2474.47	0.0037	1	49.25		30	0.00066	R	IINEPTAAAIAYGLDKK	A					File4254 Spectrum287713 scans: 34808	126/130C	---	127c/130C	---	128c/130C	---	129c/130C	---	131/130C	---	127n/130C	---	128n/130C	---	129n/130C	---
1	1	Pavir.Cb00504.1.p|PACid:30269945	Pavir.Cb00504.1.p|PACid:30269945	4421	82978	238	238	27	27	45.5	5.13	534185	1	0	0	825.832	2474.48	3	2474.47	0.0037	1	57.11	28	30	7.7e-05	R	IINEPTAAAIAYGLDKK	A					File4253 Spectrum243944 scans: 33911	126/130C	---	127c/130C	---	128c/130C	---	129c/130C	---	131/130C	---	127n/130C	---	128n/130C	---	129n/130C	---
1	1	Pavir.Cb00504.1.p|PACid:30269945	Pavir.Cb00504.1.p|PACid:30269945	4421	82978	238	238	27	27	45.5	5.13	534189	1	0	0	825.832	2474.48	3	2474.47	0.0039	1	48.21	28	30	0.00055	R	IINEPTAAAIAYGLDKK	A					File4254 Spectrum287474 scans: 34538	126/130C	---	127c/130C	---	128c/130C	---	129c/130C	---	131/130C	---	127n/130C	---	128n/130C	---	129n/130C	---
1	1	Pavir.Cb00504.1.p|PACid:30269945	Pavir.Cb00504.1.p|PACid:30269945	4421	82978	238	238	27	27	45.5	5.13	534197	1	0	0	825.833	2474.48	3	2474.47	0.0044	1	40.07	22	30	0.00085	R	IINEPTAAAIAYGLDKK	A					File4255 Spectrum329466 scans: 33316	126/130C	---	127c/130C	---	128c/130C	---	129c/130C	---	131/130C	---	127n/130C	---	128n/130C	---	129n/130C	---
1	1	Pavir.Cb00504.1.p|PACid:30269945	Pavir.Cb00504.1.p|PACid:30269945	4421	82978	238	238	27	27	45.5	5.13	534214	1	0	0	619.627	2474.48	4	2474.47	0.0056	1	25.51	14	30	0.004	R	IINEPTAAAIAYGLDKK	A					File4254 Spectrum287775 scans: 34878	126/130C	---	127c/130C	---	128c/130C	---	129c/130C	---	131/130C	---	127n/130C	---	128n/130C	---	129n/130C	---
1	1	Pavir.Cb00504.1.p|PACid:30269945	Pavir.Cb00504.1.p|PACid:30269945	4421	82978	238	238	27	27	45.5	5.13	534435	1	0	0	826.159	2475.46	3	2475.46	0.0001	1	43.38	28	31	0.0016	R	IINEPTAAAIAYGLDKK	A	Deamidated (NQ)	0.00100000000000000.0			File4250 Spectrum115108 scans: 34357	126/130C	---	127c/130C	---	128c/130C	---	129c/130C	---	131/130C	---	127n/130C	---	128n/130C	---	129n/130C	---
1	1	Pavir.Cb00504.1.p|PACid:30269945	Pavir.Cb00504.1.p|PACid:30269945	4421	82978	238	238	27	27	45.5	5.13	534436	1	0	0	619.871	2475.46	4	2475.46	0.0008	1	27.43	14	31	0.0027	R	IINEPTAAAIAYGLDKK	A	Deamidated (NQ)	0.00100000000000000.0			File4249 Spectrum71046 scans: 34495	126/130C	---	127c/130C	---	128c/130C	---	129c/130C	---	131/130C	---	127n/130C	---	128n/130C	---	129n/130C	---
1	1	Pavir.Cb00504.1.p|PACid:30269945	Pavir.Cb00504.1.p|PACid:30269945	4421	82978	238	238	27	27	45.5	5.13	534437	1	0	0	826.16	2475.46	3	2475.46	0.0013	1	46.13	30	31	0.0014	R	IINEPTAAAIAYGLDKK	A	Deamidated (NQ)	0.00100000000000000.0			File4250 Spectrum115354 scans: 34627	126/130C	---	127c/130C	---	128c/130C	---	129c/130C	---	131/130C	---	127n/130C	---	128n/130C	---	129n/130C	---
1	1	Pavir.Cb00504.1.p|PACid:30269945	Pavir.Cb00504.1.p|PACid:30269945	4421	82978	238	238	27	27	45.5	5.13	534439	1	0	0	826.16	2475.46	3	2475.46	0.0022	1	33.16	21	31	0.0033	R	IINEPTAAAIAYGLDKK	A	Deamidated (NQ)	0.00100000000000000.0			File4250 Spectrum115604 scans: 34903	126/130C	---	127c/130C	---	128c/130C	---	129c/130C	---	131/130C	---	127n/130C	---	128n/130C	---	129n/130C	---
1	1	Pavir.Cb00504.1.p|PACid:30269945	Pavir.Cb00504.1.p|PACid:30269945	4421	82978	238	238	27	27	45.5	5.13	534443	1	0	0	826.161	2475.46	3	2475.46	0.0044	1	38.23	16	31	0.0003	R	IINEPTAAAIAYGLDKK	A	Deamidated (NQ)	0.00100000000000000.0			File4249 Spectrum71133 scans: 34589	126/130C	---	127c/130C	---	128c/130C	---	129c/130C	---	131/130C	---	127n/130C	---	128n/130C	---	129n/130C	---
1	1	Pavir.Cb00504.1.p|PACid:30269945	Pavir.Cb00504.1.p|PACid:30269945	4421	82978	238	238	27	27	45.5	5.13	616749	1	0	0	963.149	2886.42	3	2886.42	0.0007	0	30.1	20	34	0.0052	K	EQVFSTYSDNQPGVLIQVYEGER	T					File4264 Spectrum699989 scans: 35457	126/130C	---	127c/130C	---	128c/130C	---	129c/130C	---	131/130C	---	127n/130C	---	128n/130C	---	129n/130C	---
1	1	Pavir.Cb00504.1.p|PACid:30269945	Pavir.Cb00504.1.p|PACid:30269945	4421	82978	238	238	27	27	45.5	5.13	616753	1	0	0	963.149	2886.42	3	2886.42	0.0009	0	38.63	20	34	0.00074	K	EQVFSTYSDNQPGVLIQVYEGER	T					File4250 Spectrum115754 scans: 35068	126/130C	---	127c/130C	---	128c/130C	---	129c/130C	---	131/130C	---	127n/130C	---	128n/130C	---	129n/130C	---
1	1	Pavir.Cb00504.1.p|PACid:30269945	Pavir.Cb00504.1.p|PACid:30269945	4421	82978	238	238	27	27	45.5	5.13	616764	1	0	0	963.149	2886.43	3	2886.42	0.0025	0	32.6	18	34	0.0021	K	EQVFSTYSDNQPGVLIQVYEGER	T					File4264 Spectrum699745 scans: 35190	126/130C	---	127c/130C	---	128c/130C	---	129c/130C	---	131/130C	---	127n/130C	---	128n/130C	---	129n/130C	---
1	1	Pavir.Cb00504.1.p|PACid:30269945	Pavir.Cb00504.1.p|PACid:30269945	4421	82978	238	238	27	27	45.5	5.13	616767	1	0	0	963.149	2886.43	3	2886.42	0.0028	0	54.68	20	34	2.1e-05	K	EQVFSTYSDNQPGVLIQVYEGER	T					File4249 Spectrum71134 scans: 34591	126/130C	---	127c/130C	---	128c/130C	---	129c/130C	---	131/130C	---	127n/130C	---	128n/130C	---	129n/130C	---
1	1	Pavir.Cb00504.1.p|PACid:30269945	Pavir.Cb00504.1.p|PACid:30269945	4421	82978	238	238	27	27	45.5	5.13	616768	1	0	0	963.149	2886.43	3	2886.42	0.0029	0	25.23	17	34	0.0094	K	EQVFSTYSDNQPGVLIQVYEGER	T					File4264 Spectrum700226 scans: 35717	126/130C	---	127c/130C	---	128c/130C	---	129c/130C	---	131/130C	---	127n/130C	---	128n/130C	---	129n/130C	---
1	1	Pavir.Cb00504.1.p|PACid:30269945	Pavir.Cb00504.1.p|PACid:30269945	4421	82978	238	238	27	27	45.5	5.13	616771	1	0	0	963.15	2886.43	3	2886.42	0.0031	0	44.13	20	34	0.00022	K	EQVFSTYSDNQPGVLIQVYEGER	T					File4264 Spectrum699510 scans: 34931	126/130C	---	127c/130C	---	128c/130C	---	129c/130C	---	131/130C	---	127n/130C	---	128n/130C	---	129n/130C	---
1	1	Pavir.Cb00504.1.p|PACid:30269945	Pavir.Cb00504.1.p|PACid:30269945	4421	82978	238	238	27	27	45.5	5.13	616773	1	0	0	722.614	2886.43	4	2886.42	0.0033	0	28.04	19	34	0.0064	K	EQVFSTYSDNQPGVLIQVYEGER	T					File4249 Spectrum71342 scans: 34819	126/130C	---	127c/130C	---	128c/130C	---	129c/130C	---	131/130C	---	127n/130C	---	128n/130C	---	129n/130C	---
1	1	Pavir.Cb00504.1.p|PACid:30269945	Pavir.Cb00504.1.p|PACid:30269945	4421	82978	238	238	27	27	45.5	5.13	616779	1	0	0	963.15	2886.43	3	2886.42	0.0044	0	34.38	16	34	0.00082	K	EQVFSTYSDNQPGVLIQVYEGER	T					File4249 Spectrum71375 scans: 34855	126/130C	---	127c/130C	---	128c/130C	---	129c/130C	---	131/130C	---	127n/130C	---	128n/130C	---	129n/130C	---
1	1	Pavir.Cb00504.1.p|PACid:30269945	Pavir.Cb00504.1.p|PACid:30269945	4421	82978	238	238	27	27	45.5	5.13	617052	1	0	0	963.478	2887.41	3	2887.41	0.0038	0	31.85	20	34	0.0036	K	EQVFSTYSDNQPGVLIQVYEGER	T	Deamidated (NQ)	0.00000000001000000000000.0			File4261 Spectrum569091 scans: 36844	126/130C	---	127c/130C	---	128c/130C	---	129c/130C	---	131/130C	---	127n/130C	---	128n/130C	---	129n/130C	---
1	1	Pavir.Cb00504.1.p|PACid:30269945	Pavir.Cb00504.1.p|PACid:30269945	4421	82978	238	238	27	27	45.5	5.13	638559	1	0	0	759.428	3033.68	4	3033.68	0.0031	1	26.58	18	33	0.0074	R	LIGDAAKNQVAMNPINTVFDAK	R	Deamidated (NQ); Oxidation (M)	0.0000000100030000000000.0			File4253 Spectrum244826 scans: 34912	126/130C	---	127c/130C	---	128c/130C	---	129c/130C	---	131/130C	---	127n/130C	---	128n/130C	---	129n/130C	---
1	1	Pavir.Cb00504.1.p|PACid:30269945	Pavir.Cb00504.1.p|PACid:30269945	4421	82978	238	238	27	27	45.5	5.13	641437	1	0	1	1020.54	3058.6	3	3058.6	0.0023	0	58.12	25	35	2.7e-05	K	NINPDEAVAYGAAVQAAILSGEGNEK	V					File4258 Spectrum442246 scans: 41622	126/130C	0.815	127c/130C	1.709	128c/130C	2.443	129c/130C	0.923	131/130C	2.035	127n/130C	1.054	128n/130C	1.055	129n/130C	1.393
1	1	Pavir.Cb00504.1.p|PACid:30269945	Pavir.Cb00504.1.p|PACid:30269945	4421	82978	238	238	27	27	45.5	5.13	641440	1	0	1	1020.54	3058.6	3	3058.6	0.0032	0	41.75	23	35	0.00075	K	NINPDEAVAYGAAVQAAILSGEGNEK	V					File4258 Spectrum442481 scans: 41890	126/130C	1.36	127c/130C	-0.12	128c/130C	-0.11	129c/130C	-0.108	131/130C	1.761	127n/130C	1.087	128n/130C	-0.13	129n/130C	1.813
1	1	Pavir.Cb00504.1.p|PACid:30269945	Pavir.Cb00504.1.p|PACid:30269945	4421	82978	238	238	27	27	45.5	5.13	641441	1	0	1	765.658	3058.6	4	3058.6	0.0041	0	47.93	23	35	0.0002	K	NINPDEAVAYGAAVQAAILSGEGNEK	V					File4258 Spectrum442419 scans: 41819	126/130C	1.165	127c/130C	1.224	128c/130C	1.659	129c/130C	1.916	131/130C	2.217	127n/130C	1.89	128n/130C	0.999	129n/130C	2.18
1	1	Pavir.Cb00504.1.p|PACid:30269945	Pavir.Cb00504.1.p|PACid:30269945	4421	82978	238	238	27	27	45.5	5.13	648309	1	0	1	779.106	3112.39	4	3112.39	-0.0005	0	21.79	14	29	0.0092	K	MYQGAGADMGGAAGMDEDAPAGSGGPGPK	I	2 Oxidation (M)	0.00000000300000300000000000000.0			File4263 Spectrum639147 scans: 16645	126/130C	0.557	127c/130C	0.708	128c/130C	0.476	129c/130C	1.055	131/130C	1.002	127n/130C	0.703	128n/130C	0.47	129n/130C	0.821
1	1	Pavir.Cb00504.1.p|PACid:30269945	Pavir.Cb00504.1.p|PACid:30269945	4421	82978	238	238	27	27	45.5	5.13	648315	1	0	1	779.107	3112.4	4	3112.39	0.0049	0	36.42	19	29	0.0011	K	MYQGAGADMGGAAGMDEDAPAGSGGPGPK	I	2 Oxidation (M)	0.30000000300000000000000000000.0			File4263 Spectrum639694 scans: 17240	126/130C	0.67	127c/130C	0.88	128c/130C	0.682	129c/130C	0.95	131/130C	0.831	127n/130C	0.528	128n/130C	1.051	129n/130C	0.634
1	1	Pavir.Cb00504.1.p|PACid:30269945	Pavir.Cb00504.1.p|PACid:30269945	4421	82978	238	238	27	27	45.5	5.13	648319	1	0	1	779.108	3112.4	4	3112.39	0.0071	0	21.94	14	29	0.0099	K	MYQGAGADMGGAAGMDEDAPAGSGGPGPK	I	2 Oxidation (M)	0.00000000300000300000000000000.0			File4261 Spectrum551142 scans: 17226	126/130C	1.044	127c/130C	1.184	128c/130C	1.2	129c/130C	2.068	131/130C	1.25	127n/130C	1.397	128n/130C	1.329	129n/130C	1.454
1	1	Pavir.Cb00504.1.p|PACid:30269945	Pavir.Cb00504.1.p|PACid:30269945	4421	82978	238	238	27	27	45.5	5.13	650253	1	0	1	783.105	3128.39	4	3128.39	0.0015	0	46.58	26	28	0.00047	K	MYQGAGADMGGAAGMDEDAPAGSGGPGPK	I	3 Oxidation (M)	0.30000000300000300000000000000.0			File4255 Spectrum311204 scans: 13382	126/130C	1.139	127c/130C	1.925	128c/130C	1.307	129c/130C	1.945	131/130C	1.911	127n/130C	1.865	128n/130C	1.327	129n/130C	1.284
1	1	Pavir.Cb00504.1.p|PACid:30269945	Pavir.Cb00504.1.p|PACid:30269945	4421	82978	238	238	27	27	45.5	5.13	650258	1	0	1	783.106	3128.4	4	3128.39	0.0061	0	35.89	23	28	0.0028	K	MYQGAGADMGGAAGMDEDAPAGSGGPGPK	I	3 Oxidation (M)	0.30000000300000300000000000000.0			File4263 Spectrum636724 scans: 13968	126/130C	0.614	127c/130C	0.854	128c/130C	1.003	129c/130C	0.566	131/130C	0.608	127n/130C	1.011	128n/130C	0.802	129n/130C	0.744
1	1	Pavir.Cb00504.1.p|PACid:30269945	Pavir.Cb00504.1.p|PACid:30269945	4421	82978	238	238	27	27	45.5	5.13	650339	1	0	1	783.355	3129.39	4	3129.37	0.0172	0	35.13	23	28	0.0031	K	MYQGAGADMGGAAGMDEDAPAGSGGPGPK	I	Deamidated (NQ); 3 Oxidation (M)	0.30100000300000300000000000000.0			File4263 Spectrum636596 scans: 13829	126/130C	0.989	127c/130C	1.29	128c/130C	1.194	129c/130C	1.376	131/130C	1.159	127n/130C	0.977	128n/130C	1.013	129n/130C	1.144
1	1	Pavir.Cb00504.1.p|PACid:30269945	Pavir.Cb00504.1.p|PACid:30269945	4421	82978	238	238	27	27	45.5	5.13	661647	1	0	0	811.928	3243.68	4	3243.68	0.0006	1	45.04	21	35	0.00021	K	KEQVFSTYSDNQPGVLIQVYEGER	T					File4260 Spectrum520976 scans: 32564	126/130C	---	127c/130C	---	128c/130C	---	129c/130C	---	131/130C	---	127n/130C	---	128n/130C	---	129n/130C	---
1	1	Pavir.Cb00504.1.p|PACid:30269945	Pavir.Cb00504.1.p|PACid:30269945	4421	82978	238	238	27	27	45.5	5.13	661650	1	0	0	811.928	3243.68	4	3243.68	0.0023	1	41.33	19	35	0.00037	K	KEQVFSTYSDNQPGVLIQVYEGER	T					File4260 Spectrum520934 scans: 32518	126/130C	---	127c/130C	---	128c/130C	---	129c/130C	---	131/130C	---	127n/130C	---	128n/130C	---	129n/130C	---
1	1	Pavir.Cb00504.1.p|PACid:30269945	Pavir.Cb00504.1.p|PACid:30269945	4421	82978	238	238	27	27	45.5	5.13	661720	1	0	0	812.179	3244.69	4	3244.67	0.0205	1	34.35	20	35	0.0021	K	KEQVFSTYSDNQPGVLIQVYEGER	T	Deamidated (NQ)	0.000000000000000001000000.0			File4261 Spectrum565700 scans: 33100	126/130C	---	127c/130C	---	128c/130C	---	129c/130C	---	131/130C	---	127n/130C	---	128n/130C	---	129n/130C	---
1	2	Pavir.Ia03670.1.p|PACid:30213866	Pavir.Ia03670.1.p|PACid:30213866	3226	83084	188	188	23	23	37.8	5.13	109918	1	0	0	670.346	1338.68	2	1338.68	0.002	0	29.26	21	30	0.0079	K	CMEPVEK	C	Methylthio (C)	0.2000000.0			File4259 Spectrum465471 scans: 18921	126/130C	---	127c/130C	---	128c/130C	---	129c/130C	---	131/130C	---	127n/130C	---	128n/130C	---	129n/130C	---
1	2	Pavir.Ia03670.1.p|PACid:30213866	Pavir.Ia03670.1.p|PACid:30213866	3226	83084	188	188	23	23	37.8	5.13	158066	1	0	0	729.4	1456.79	2	1456.78	0.0013	0	55.5	22	31	2.5e-05	R	VEIIANDQGNR	T					File4249 Spectrum52623 scans: 14395	126/130C	---	127c/130C	---	128c/130C	---	129c/130C	---	131/130C	---	127n/130C	---	128n/130C	---	129n/130C	---
1	2	Pavir.Ia03670.1.p|PACid:30213866	Pavir.Ia03670.1.p|PACid:30213866	3226	83084	188	188	23	23	37.8	5.13	158365	1	0	0	729.892	1457.77	2	1457.77	0.0012	0	52.57	24	31	7.4e-05	R	VEIIANDQGNR	T	Deamidated (NQ)	0.00000100000.0			File4259 Spectrum462868 scans: 16055	126/130C	---	127c/130C	---	128c/130C	---	129c/130C	---	131/130C	---	127n/130C	---	128n/130C	---	129n/130C	---
1	2	Pavir.Ia03670.1.p|PACid:30213866	Pavir.Ia03670.1.p|PACid:30213866	3226	83084	188	188	23	23	37.8	5.13	158368	1	0	0	729.892	1457.77	2	1457.77	0.0017	0	35	24	31	0.0045	R	VEIIANDQGNR	T	Deamidated (NQ)	0.00000100000.0			File4261 Spectrum550017 scans: 16001	126/130C	---	127c/130C	---	128c/130C	---	129c/130C	---	131/130C	---	127n/130C	---	128n/130C	---	129n/130C	---
1	2	Pavir.Ia03670.1.p|PACid:30213866	Pavir.Ia03670.1.p|PACid:30213866	3226	83084	188	188	23	23	37.8	5.13	158370	1	0	0	729.892	1457.77	2	1457.77	0.0018	0	50.59	26	31	0.00019	R	VEIIANDQGNR	T	Deamidated (NQ)	0.00000000010.0			File4262 Spectrum593972 scans: 15390	126/130C	---	127c/130C	---	128c/130C	---	129c/130C	---	131/130C	---	127n/130C	---	128n/130C	---	129n/130C	---
1	2	Pavir.Ia03670.1.p|PACid:30213866	Pavir.Ia03670.1.p|PACid:30213866	3226	83084	188	188	23	23	37.8	5.13	159436	1	0	0	730.909	1459.8	2	1459.8	0.0021	0	47.94		32	0.0013	K	DAGVISGLNVMR	I					File4257 Spectrum383948 scans: 24988	126/130C	---	127c/130C	---	128c/130C	---	129c/130C	---	131/130C	---	127n/130C	---	128n/130C	---	129n/130C	---
1	2	Pavir.Ia03670.1.p|PACid:30213866	Pavir.Ia03670.1.p|PACid:30213866	3226	83084	188	188	23	23	37.8	5.13	159440	1	0	0	730.909	1459.8	2	1459.8	0.0026	0	41.88		32	0.0055	K	DAGVISGLNVMR	I					File4257 Spectrum384190 scans: 25253	126/130C	---	127c/130C	---	128c/130C	---	129c/130C	---	131/130C	---	127n/130C	---	128n/130C	---	129n/130C	---
1	2	Pavir.Ia03670.1.p|PACid:30213866	Pavir.Ia03670.1.p|PACid:30213866	3226	83084	188	188	23	23	37.8	5.13	166471	1	0	0	738.906	1475.8	2	1475.8	0.0008	0	52.3	28	32	0.0002	K	DAGVISGLNVMR	I	Oxidation (M)	0.000000000030.0			File4252 Spectrum188024 scans: 19253	126/130C	---	127c/130C	---	128c/130C	---	129c/130C	---	131/130C	---	127n/130C	---	128n/130C	---	129n/130C	---
1	2	Pavir.Ia03670.1.p|PACid:30213866	Pavir.Ia03670.1.p|PACid:30213866	3226	83084	188	188	23	23	37.8	5.13	166472	1	0	0	738.906	1475.8	2	1475.8	0.0008	0	58.11	22	32	1.4e-05	K	DAGVISGLNVMR	I	Oxidation (M)	0.000000000030.0			File4253 Spectrum230701 scans: 19305	126/130C	---	127c/130C	---	128c/130C	---	129c/130C	---	131/130C	---	127n/130C	---	128n/130C	---	129n/130C	---
1	2	Pavir.Ia03670.1.p|PACid:30213866	Pavir.Ia03670.1.p|PACid:30213866	3226	83084	188	188	23	23	37.8	5.13	166473	1	0	0	492.94	1475.8	3	1475.8	0.0008	0	43.06	27	32	0.0013	K	DAGVISGLNVMR	I	Oxidation (M)	0.000000000030.0			File4252 Spectrum188046 scans: 19277	126/130C	---	127c/130C	---	128c/130C	---	129c/130C	---	131/130C	---	127n/130C	---	128n/130C	---	129n/130C	---
1	2	Pavir.Ia03670.1.p|PACid:30213866	Pavir.Ia03670.1.p|PACid:30213866	3226	83084	188	188	23	23	37.8	5.13	166474	1	0	0	492.94	1475.8	3	1475.8	0.0008	0	49.54	30	32	0.00061	K	DAGVISGLNVMR	I	Oxidation (M)	0.000000000030.0			File4253 Spectrum230436 scans: 19017	126/130C	---	127c/130C	---	128c/130C	---	129c/130C	---	131/130C	---	127n/130C	---	128n/130C	---	129n/130C	---
1	2	Pavir.Ia03670.1.p|PACid:30213866	Pavir.Ia03670.1.p|PACid:30213866	3226	83084	188	188	23	23	37.8	5.13	166486	1	0	0	738.906	1475.8	2	1475.8	0.0013	0	47.05	27	32	0.00059	K	DAGVISGLNVMR	I	Oxidation (M)	0.000000000030.0			File4253 Spectrum230454 scans: 19037	126/130C	---	127c/130C	---	128c/130C	---	129c/130C	---	131/130C	---	127n/130C	---	128n/130C	---	129n/130C	---
1	2	Pavir.Ia03670.1.p|PACid:30213866	Pavir.Ia03670.1.p|PACid:30213866	3226	83084	188	188	23	23	37.8	5.13	166487	1	0	0	492.94	1475.8	3	1475.8	0.0014	0	37.27	25	32	0.0037	K	DAGVISGLNVMR	I	Oxidation (M)	0.000000000030.0			File4257 Spectrum379273 scans: 19867	126/130C	---	127c/130C	---	128c/130C	---	129c/130C	---	131/130C	---	127n/130C	---	128n/130C	---	129n/130C	---
1	2	Pavir.Ia03670.1.p|PACid:30213866	Pavir.Ia03670.1.p|PACid:30213866	3226	83084	188	188	23	23	37.8	5.13	166490	1	0	0	738.907	1475.8	2	1475.8	0.0015	0	51.13	21	32	6e-05	K	DAGVISGLNVMR	I	Oxidation (M)	0.000000000030.0			File4257 Spectrum379264 scans: 19857	126/130C	---	127c/130C	---	128c/130C	---	129c/130C	---	131/130C	---	127n/130C	---	128n/130C	---	129n/130C	---
1	2	Pavir.Ia03670.1.p|PACid:30213866	Pavir.Ia03670.1.p|PACid:30213866	3226	83084	188	188	23	23	37.8	5.13	166492	1	0	0	492.94	1475.8	3	1475.8	0.0023	0	33.78	25	32	0.0081	K	DAGVISGLNVMR	I	Oxidation (M)	0.000000000030.0			File4257 Spectrum379032 scans: 19603	126/130C	---	127c/130C	---	128c/130C	---	129c/130C	---	131/130C	---	127n/130C	---	128n/130C	---	129n/130C	---
1	2	Pavir.Ia03670.1.p|PACid:30213866	Pavir.Ia03670.1.p|PACid:30213866	3226	83084	188	188	23	23	37.8	5.13	166494	1	0	0	738.907	1475.8	2	1475.8	0.0025	0	55.99	21	32	1.9e-05	K	DAGVISGLNVMR	I	Oxidation (M)	0.000000000030.0			File4258 Spectrum422318 scans: 19605	126/130C	---	127c/130C	---	128c/130C	---	129c/130C	---	131/130C	---	127n/130C	---	128n/130C	---	129n/130C	---
1	2	Pavir.Ia03670.1.p|PACid:30213866	Pavir.Ia03670.1.p|PACid:30213866	3226	83084	188	188	23	23	37.8	5.13	166496	1	0	0	738.907	1475.8	2	1475.8	0.0026	0	36.54	23	32	0.0026	K	DAGVISGLNVMR	I	Oxidation (M)	0.000000000030.0			File4257 Spectrum379022 scans: 19592	126/130C	---	127c/130C	---	128c/130C	---	129c/130C	---	131/130C	---	127n/130C	---	128n/130C	---	129n/130C	---
1	2	Pavir.Ia03670.1.p|PACid:30213866	Pavir.Ia03670.1.p|PACid:30213866	3226	83084	188	188	23	23	37.8	5.13	166499	1	0	0	738.907	1475.8	2	1475.8	0.0032	0	39.11	16	32	0.00025	K	DAGVISGLNVMR	I	Oxidation (M)	0.000000000030.0			File4258 Spectrum422576 scans: 19884	126/130C	---	127c/130C	---	128c/130C	---	129c/130C	---	131/130C	---	127n/130C	---	128n/130C	---	129n/130C	---
1	2	Pavir.Ia03670.1.p|PACid:30213866	Pavir.Ia03670.1.p|PACid:30213866	3226	83084	188	188	23	23	37.8	5.13	166503	1	0	0	738.908	1475.8	2	1475.8	0.0036	0	47.33	20	32	0.00011	K	DAGVISGLNVMR	I	Oxidation (M)	0.000000000030.0			File4252 Spectrum187775 scans: 18981	126/130C	---	127c/130C	---	128c/130C	---	129c/130C	---	131/130C	---	127n/130C	---	128n/130C	---	129n/130C	---
1	2	Pavir.Ia03670.1.p|PACid:30213866	Pavir.Ia03670.1.p|PACid:30213866	3226	83084	188	188	23	23	37.8	5.13	201422	1	0	0	779.893	1557.77	2	1557.77	0.0005	0	40.43	23	30	0.0011	R	FEELNMDLFR	K	Oxidation (M)	0.0000030000.0			File4253 Spectrum242175 scans: 31934	126/130C	---	127c/130C	---	128c/130C	---	129c/130C	---	131/130C	---	127n/130C	---	128n/130C	---	129n/130C	---
1	2	Pavir.Ia03670.1.p|PACid:30213866	Pavir.Ia03670.1.p|PACid:30213866	3226	83084	188	188	23	23	37.8	5.13	201428	1	0	0	779.893	1557.77	2	1557.77	0.0019	0	49.94	24	30	0.00015	R	FEELNMDLFR	K	Oxidation (M)	0.0000030000.0			File4259 Spectrum477616 scans: 32444	126/130C	---	127c/130C	---	128c/130C	---	129c/130C	---	131/130C	---	127n/130C	---	128n/130C	---	129n/130C	---
1	2	Pavir.Ia03670.1.p|PACid:30213866	Pavir.Ia03670.1.p|PACid:30213866	3226	83084	188	188	23	23	37.8	5.13	215203	1	0	0	795.514	1589.01	2	1589.01	0.0015	1	21.86	14	28	0.0089	R	NTTIPTKK	E					File4254 Spectrum265144 scans: 9995	126/130C	---	127c/130C	---	128c/130C	---	129c/130C	---	131/130C	---	127n/130C	---	128n/130C	---	129n/130C	---
1	2	Pavir.Ia03670.1.p|PACid:30213866	Pavir.Ia03670.1.p|PACid:30213866	3226	83084	188	188	23	23	37.8	5.13	215225	1	0	0	795.514	1589.01	2	1589.01	0.0016	1	24.66	14	28	0.0049	R	NTTIPTKK	E					File4254 Spectrum265392 scans: 10269	126/130C	---	127c/130C	---	128c/130C	---	129c/130C	---	131/130C	---	127n/130C	---	128n/130C	---	129n/130C	---
1	2	Pavir.Ia03670.1.p|PACid:30213866	Pavir.Ia03670.1.p|PACid:30213866	3226	83084	188	188	23	23	37.8	5.13	215235	1	0	0	795.514	1589.01	2	1589.01	0.0017	1	24.75	14	28	0.0048	R	NTTIPTKK	E					File4253 Spectrum222379 scans: 10139	126/130C	---	127c/130C	---	128c/130C	---	129c/130C	---	131/130C	---	127n/130C	---	128n/130C	---	129n/130C	---
1	2	Pavir.Ia03670.1.p|PACid:30213866	Pavir.Ia03670.1.p|PACid:30213866	3226	83084	188	188	23	23	37.8	5.13	215711	1	0	0	796.014	1590.01	2	1590	0.0184	1	23.25	15	30	0.0075	R	NTTIPTKK	E	Deamidated (NQ)	0.10000000.0			File4254 Spectrum265638 scans: 10541	126/130C	---	127c/130C	---	128c/130C	---	129c/130C	---	131/130C	---	127n/130C	---	128n/130C	---	129n/130C	---
1	2	Pavir.Ia03670.1.p|PACid:30213866	Pavir.Ia03670.1.p|PACid:30213866	3226	83084	188	188	23	23	37.8	5.13	221286	1	0	1	802.391	1602.77	2	1602.77	0.0011	0	43.19	26	28	0.0011	K	NSLENYAYNMR	N					File4263 Spectrum643285 scans: 21146	126/130C	1.167	127c/130C	1.236	128c/130C	0.987	129c/130C	1.521	131/130C	1.553	127n/130C	1.265	128n/130C	1.04	129n/130C	1.506
1	2	Pavir.Ia03670.1.p|PACid:30213866	Pavir.Ia03670.1.p|PACid:30213866	3226	83084	188	188	23	23	37.8	5.13	221288	1	0	1	802.391	1602.77	2	1602.77	0.0018	0	43.63	15	28	8.1e-05	K	NSLENYAYNMR	N					File4264 Spectrum686879 scans: 21180	126/130C	1.175	127c/130C	1.267	128c/130C	1.254	129c/130C	1.7	131/130C	1.587	127n/130C	1.317	128n/130C	1.132	129n/130C	1.653
1	2	Pavir.Ia03670.1.p|PACid:30213866	Pavir.Ia03670.1.p|PACid:30213866	3226	83084	188	188	23	23	37.8	5.13	221289	1	0	1	535.263	1602.77	3	1602.77	0.0018	0	30	19	28	0.0044	K	NSLENYAYNMR	N					File4264 Spectrum686902 scans: 21205	126/130C	1.206	127c/130C	1.373	128c/130C	1.29	129c/130C	1.383	131/130C	1.433	127n/130C	1.098	128n/130C	1.183	129n/130C	1.179
1	2	Pavir.Ia03670.1.p|PACid:30213866	Pavir.Ia03670.1.p|PACid:30213866	3226	83084	188	188	23	23	37.8	5.13	221674	1	0	1	802.883	1603.75	2	1603.75	0.0003	0	60.93	21	27	6e-06	K	NSLENYAYNMR	N	Deamidated (NQ)	0.00000000100.0			File4259 Spectrum468651 scans: 22413	126/130C	1.015	127c/130C	1.038	128c/130C	1.016	129c/130C	1.029	131/130C	1.259	127n/130C	0.99	128n/130C	0.615	129n/130C	1.013
1	2	Pavir.Ia03670.1.p|PACid:30213866	Pavir.Ia03670.1.p|PACid:30213866	3226	83084	188	188	23	23	37.8	5.13	227858	1	0	1	810.388	1618.76	2	1618.76	0.0002	0	44.95		28	0.0011	K	NSLENYAYNMR	N	Oxidation (M)	0.00000000030.0			File4260 Spectrum505722 scans: 15942	126/130C	1.126	127c/130C	1.278	128c/130C	1.021	129c/130C	1.821	131/130C	1.419	127n/130C	1.327	128n/130C	0.765	129n/130C	1.341
1	2	Pavir.Ia03670.1.p|PACid:30213866	Pavir.Ia03670.1.p|PACid:30213866	3226	83084	188	188	23	23	37.8	5.13	227862	1	0	1	810.388	1618.76	2	1618.76	0.0007	0	44.83		28	0.0011	K	NSLENYAYNMR	N	Oxidation (M)	0.00000000030.0			File4260 Spectrum505974 scans: 16216	126/130C	1.421	127c/130C	1.277	128c/130C	1.246	129c/130C	1.969	131/130C	1.642	127n/130C	1.471	128n/130C	0.78	129n/130C	1.762
1	2	Pavir.Ia03670.1.p|PACid:30213866	Pavir.Ia03670.1.p|PACid:30213866	3226	83084	188	188	23	23	37.8	5.13	227863	1	0	1	810.388	1618.76	2	1618.76	0.0007	0	39.99		28	0.0034	K	NSLENYAYNMR	N	Oxidation (M)	0.00000000030.0			File4264 Spectrum682220 scans: 16112	126/130C	1.663	127c/130C	1.208	128c/130C	1.244	129c/130C	2.108	131/130C	1.707	127n/130C	1.671	128n/130C	0.92	129n/130C	1.513
1	2	Pavir.Ia03670.1.p|PACid:30213866	Pavir.Ia03670.1.p|PACid:30213866	3226	83084	188	188	23	23	37.8	5.13	227865	1	0	1	540.595	1618.76	3	1618.76	0.0012	0	35.16	26	28	0.0061	K	NSLENYAYNMR	N	Oxidation (M)	0.00000000030.0			File4264 Spectrum682196 scans: 16086	126/130C	0.657	127c/130C	0.943	128c/130C	0.856	129c/130C	0.825	131/130C	0.829	127n/130C	0.871	128n/130C	0.812	129n/130C	0.656
1	2	Pavir.Ia03670.1.p|PACid:30213866	Pavir.Ia03670.1.p|PACid:30213866	3226	83084	188	188	23	23	37.8	5.13	227875	1	0	1	810.389	1618.76	2	1618.76	0.0013	0	43.16		28	0.0017	K	NSLENYAYNMR	N	Oxidation (M)	0.00000000030.0			File4259 Spectrum462740 scans: 15910	126/130C	1.301	127c/130C	1.373	128c/130C	1.216	129c/130C	1.667	131/130C	1.512	127n/130C	1.228	128n/130C	1.061	129n/130C	1.345
1	2	Pavir.Ia03670.1.p|PACid:30213866	Pavir.Ia03670.1.p|PACid:30213866	3226	83084	188	188	23	23	37.8	5.13	227879	1	0	1	810.389	1618.76	2	1618.76	0.0017	0	42.38		28	0.002	K	NSLENYAYNMR	N	Oxidation (M)	0.00000000030.0			File4264 Spectrum681972 scans: 15844	126/130C	1.295	127c/130C	1.09	128c/130C	1.081	129c/130C	1.835	131/130C	1.368	127n/130C	1.221	128n/130C	0.785	129n/130C	1.325
1	2	Pavir.Ia03670.1.p|PACid:30213866	Pavir.Ia03670.1.p|PACid:30213866	3226	83084	188	188	23	23	37.8	5.13	227889	1	0	1	810.389	1618.76	2	1618.76	0.0029	0	31.93	24	28	0.0081	K	NSLENYAYNMR	N	Oxidation (M)	0.00000000030.0			File4259 Spectrum462957 scans: 16160	126/130C	1.138	127c/130C	1.329	128c/130C	1.207	129c/130C	1.599	131/130C	1.363	127n/130C	1.231	128n/130C	0.958	129n/130C	1.325
1	2	Pavir.Ia03670.1.p|PACid:30213866	Pavir.Ia03670.1.p|PACid:30213866	3226	83084	188	188	23	23	37.8	5.13	227891	1	0	1	810.389	1618.76	2	1618.76	0.0033	0	37.02		28	0.007	K	NSLENYAYNMR	N	Oxidation (M)	0.00000000030.0			File4259 Spectrum462736 scans: 15905	126/130C	1.398	127c/130C	1.287	128c/130C	1.061	129c/130C	1.882	131/130C	1.764	127n/130C	1.187	128n/130C	0.863	129n/130C	1.198
1	2	Pavir.Ia03670.1.p|PACid:30213866	Pavir.Ia03670.1.p|PACid:30213866	3226	83084	188	188	23	23	37.8	5.13	228317	1	0	1	810.88	1619.75	2	1619.75	0.0002	0	49.8	24	27	0.00016	K	NSLENYAYNMR	N	Deamidated (NQ); Oxidation (M)	0.00000000130.0			File4248 Spectrum12808 scans: 15970	126/130C	1.177	127c/130C	1.138	128c/130C	1.151	129c/130C	1.22	131/130C	1.225	127n/130C	1.066	128n/130C	1.169	129n/130C	1.1
1	2	Pavir.Ia03670.1.p|PACid:30213866	Pavir.Ia03670.1.p|PACid:30213866	3226	83084	188	188	23	23	37.8	5.13	228320	1	0	1	810.88	1619.75	2	1619.75	0.0011	0	29.85	20	27	0.0062	K	NSLENYAYNMR	N	Deamidated (NQ); Oxidation (M)	0.00000000130.0			File4255 Spectrum313134 scans: 15492	126/130C	1.156	127c/130C	1.058	128c/130C	1.047	129c/130C	1.277	131/130C	1.14	127n/130C	1.183	128n/130C	1.089	129n/130C	1.156
1	2	Pavir.Ia03670.1.p|PACid:30213866	Pavir.Ia03670.1.p|PACid:30213866	3226	83084	188	188	23	23	37.8	5.13	228323	1	0	1	810.88	1619.75	2	1619.75	0.0013	0	43.1		27	0.0013	K	NSLENYAYNMR	N	Deamidated (NQ); Oxidation (M)	0.10000000030.0			File4259 Spectrum464239 scans: 17568	126/130C	1.008	127c/130C	0.969	128c/130C	0.966	129c/130C	0.794	131/130C	0.965	127n/130C	0.869	128n/130C	0.719	129n/130C	0.906
1	2	Pavir.Ia03670.1.p|PACid:30213866	Pavir.Ia03670.1.p|PACid:30213866	3226	83084	188	188	23	23	37.8	5.13	228328	1	0	1	810.881	1619.75	2	1619.75	0.0017	0	53.27		27	0.00013	K	NSLENYAYNMR	N	Deamidated (NQ); Oxidation (M)	0.00000000130.0			File4248 Spectrum12852 scans: 16018	126/130C	1.174	127c/130C	0.871	128c/130C	0.972	129c/130C	1.509	131/130C	1.177	127n/130C	1.085	128n/130C	0.791	129n/130C	1.405
1	2	Pavir.Ia03670.1.p|PACid:30213866	Pavir.Ia03670.1.p|PACid:30213866	3226	83084	188	188	23	23	37.8	5.13	228331	1	0	1	810.881	1619.75	2	1619.75	0.002	0	40.59		27	0.0024	K	NSLENYAYNMR	N	Deamidated (NQ); Oxidation (M)	0.10000000030.0			File4260 Spectrum506948 scans: 17275	126/130C	1.292	127c/130C	1.47	128c/130C	0.982	129c/130C	1.682	131/130C	1.183	127n/130C	1.241	128n/130C	1.05	129n/130C	1.084
1	2	Pavir.Ia03670.1.p|PACid:30213866	Pavir.Ia03670.1.p|PACid:30213866	3226	83084	188	188	23	23	37.8	5.13	228334	1	0	1	810.881	1619.75	2	1619.75	0.0022	0	37.88	26	27	0.0033	K	NSLENYAYNMR	N	Deamidated (NQ); Oxidation (M)	0.00000000130.0			File4248 Spectrum13463 scans: 16680	126/130C	1.022	127c/130C	0.85	128c/130C	0.887	129c/130C	0.747	131/130C	0.973	127n/130C	0.975	128n/130C	0.689	129n/130C	0.973
1	2	Pavir.Ia03670.1.p|PACid:30213866	Pavir.Ia03670.1.p|PACid:30213866	3226	83084	188	188	23	23	37.8	5.13	228335	1	0	1	810.881	1619.75	2	1619.75	0.0022	0	45.61		27	0.00075	K	NSLENYAYNMR	N	Deamidated (NQ); Oxidation (M)	0.10000000030.0			File4258 Spectrum420425 scans: 17544	126/130C	0.996	127c/130C	1.063	128c/130C	0.841	129c/130C	1.234	131/130C	1.148	127n/130C	1.13	128n/130C	0.826	129n/130C	0.987
1	2	Pavir.Ia03670.1.p|PACid:30213866	Pavir.Ia03670.1.p|PACid:30213866	3226	83084	188	188	23	23	37.8	5.13	238880	1	0	0	821.46	1640.91	2	1640.9	0.001	0	29.9	16	32	0.0022	K	SSVHDVVLVGGSTR	I					File4252 Spectrum182120 scans: 12754	126/130C	---	127c/130C	---	128c/130C	---	129c/130C	---	131/130C	---	127n/130C	---	128n/130C	---	129n/130C	---
1	2	Pavir.Ia03670.1.p|PACid:30213866	Pavir.Ia03670.1.p|PACid:30213866	3226	83084	188	188	23	23	37.8	5.13	238881	1	0	0	547.976	1640.91	3	1640.9	0.0011	0	26.58	18	32	0.0081	K	SSVHDVVLVGGSTR	I					File4252 Spectrum182078 scans: 12709	126/130C	---	127c/130C	---	128c/130C	---	129c/130C	---	131/130C	---	127n/130C	---	128n/130C	---	129n/130C	---
1	2	Pavir.Ia03670.1.p|PACid:30213866	Pavir.Ia03670.1.p|PACid:30213866	3226	83084	188	188	23	23	37.8	5.13	238883	1	0	0	821.461	1640.91	2	1640.9	0.0016	0	58.27	18	32	5.4e-06	K	SSVHDVVLVGGSTR	I					File4252 Spectrum181873 scans: 12485	126/130C	---	127c/130C	---	128c/130C	---	129c/130C	---	131/130C	---	127n/130C	---	128n/130C	---	129n/130C	---
1	2	Pavir.Ia03670.1.p|PACid:30213866	Pavir.Ia03670.1.p|PACid:30213866	3226	83084	188	188	23	23	37.8	5.13	244556	1	0	1	827.957	1653.9	2	1653.9	0.0013	0	49.16	25	32	0.00024	R	FSDASVQSDIK	L					File4254 Spectrum274484 scans: 20235	126/130C	1.271	127c/130C	1.264	128c/130C	1.442	129c/130C	1.461	131/130C	1.228	127n/130C	1.384	128n/130C	1.09	129n/130C	1.51
1	2	Pavir.Ia03670.1.p|PACid:30213866	Pavir.Ia03670.1.p|PACid:30213866	3226	83084	188	188	23	23	37.8	5.13	275192	1	0	0	858.937	1715.86	2	1715.86	0.0016	0	48.92	19	31	5.7e-05	R	TTPSYVAFTDTER	L					File4263 Spectrum642482 scans: 20274	126/130C	---	127c/130C	---	128c/130C	---	129c/130C	---	131/130C	---	127n/130C	---	128n/130C	---	129n/130C	---
1	2	Pavir.Ia03670.1.p|PACid:30213866	Pavir.Ia03670.1.p|PACid:30213866	3226	83084	188	188	23	23	37.8	5.13	275193	1	0	0	572.96	1715.86	3	1715.86	0.0017	0	21.93	14	31	0.0088	R	TTPSYVAFTDTER	L					File4263 Spectrum642552 scans: 20350	126/130C	---	127c/130C	---	128c/130C	---	129c/130C	---	131/130C	---	127n/130C	---	128n/130C	---	129n/130C	---
1	2	Pavir.Ia03670.1.p|PACid:30213866	Pavir.Ia03670.1.p|PACid:30213866	3226	83084	188	188	23	23	37.8	5.13	275194	1	0	0	858.937	1715.86	2	1715.86	0.0017	0	32.86	18	31	0.002	R	TTPSYVAFTDTER	L					File4262 Spectrum598567 scans: 20402	126/130C	---	127c/130C	---	128c/130C	---	129c/130C	---	131/130C	---	127n/130C	---	128n/130C	---	129n/130C	---
1	2	Pavir.Ia03670.1.p|PACid:30213866	Pavir.Ia03670.1.p|PACid:30213866	3226	83084	188	188	23	23	37.8	5.13	276246	1	0	0	860.003	1717.99	2	1717.99	-0.0003	0	32.26	17	32	0.0019	R	LVNHFVQEFK	R					File4263 Spectrum657382 scans: 36749	126/130C	---	127c/130C	---	128c/130C	---	129c/130C	---	131/130C	---	127n/130C	---	128n/130C	---	129n/130C	---
1	2	Pavir.Ia03670.1.p|PACid:30213866	Pavir.Ia03670.1.p|PACid:30213866	3226	83084	188	188	23	23	37.8	5.13	276247	1	0	0	860.004	1717.99	2	1717.99	0.0004	0	25.54	15	33	0.0054	R	LVNHFVQEFK	R					File4263 Spectrum656508 scans: 35745	126/130C	---	127c/130C	---	128c/130C	---	129c/130C	---	131/130C	---	127n/130C	---	128n/130C	---	129n/130C	---
1	2	Pavir.Ia03670.1.p|PACid:30213866	Pavir.Ia03670.1.p|PACid:30213866	3226	83084	188	188	23	23	37.8	5.13	276248	1	0	0	860.004	1717.99	2	1717.99	0.0005	0	37.24	16	33	0.00042	R	LVNHFVQEFK	R					File4255 Spectrum328608 scans: 32376	126/130C	---	127c/130C	---	128c/130C	---	129c/130C	---	131/130C	---	127n/130C	---	128n/130C	---	129n/130C	---
1	2	Pavir.Ia03670.1.p|PACid:30213866	Pavir.Ia03670.1.p|PACid:30213866	3226	83084	188	188	23	23	37.8	5.13	276256	1	0	0	860.004	1717.99	2	1717.99	0.0014	0	47.45	22	33	0.00014	R	LVNHFVQEFK	R					File4263 Spectrum657173 scans: 36502	126/130C	---	127c/130C	---	128c/130C	---	129c/130C	---	131/130C	---	127n/130C	---	128n/130C	---	129n/130C	---
1	2	Pavir.Ia03670.1.p|PACid:30213866	Pavir.Ia03670.1.p|PACid:30213866	3226	83084	188	188	23	23	37.8	5.13	276258	1	0	0	860.004	1717.99	2	1717.99	0.0015	0	42.22	19	32	0.0003	R	LVNHFVQEFK	R					File4263 Spectrum656954 scans: 36252	126/130C	---	127c/130C	---	128c/130C	---	129c/130C	---	131/130C	---	127n/130C	---	128n/130C	---	129n/130C	---
1	2	Pavir.Ia03670.1.p|PACid:30213866	Pavir.Ia03670.1.p|PACid:30213866	3226	83084	188	188	23	23	37.8	5.13	276263	1	0	0	860.004	1717.99	2	1717.99	0.0017	0	42.4	20	33	0.00031	R	LVNHFVQEFK	R					File4263 Spectrum656733 scans: 36001	126/130C	---	127c/130C	---	128c/130C	---	129c/130C	---	131/130C	---	127n/130C	---	128n/130C	---	129n/130C	---
1	2	Pavir.Ia03670.1.p|PACid:30213866	Pavir.Ia03670.1.p|PACid:30213866	3226	83084	188	188	23	23	37.8	5.13	276271	1	0	0	860.005	1718	2	1717.99	0.0031	0	28.16	19	32	0.0075	R	LVNHFVQEFK	R					File4255 Spectrum328860 scans: 32651	126/130C	---	127c/130C	---	128c/130C	---	129c/130C	---	131/130C	---	127n/130C	---	128n/130C	---	129n/130C	---
1	2	Pavir.Ia03670.1.p|PACid:30213866	Pavir.Ia03670.1.p|PACid:30213866	3226	83084	188	188	23	23	37.8	5.13	305958	1	0	0	595.976	1784.91	3	1784.91	-0.0016	1	28.88	14	32	0.002	R	ARFEELNMDLFR	K	Oxidation (M)	0.000000030000.0			File4259 Spectrum474220 scans: 28561	126/130C	---	127c/130C	---	128c/130C	---	129c/130C	---	131/130C	---	127n/130C	---	128n/130C	---	129n/130C	---
1	2	Pavir.Ia03670.1.p|PACid:30213866	Pavir.Ia03670.1.p|PACid:30213866	3226	83084	188	188	23	23	37.8	5.13	305964	1	0	0	595.977	1784.91	3	1784.91	0.0009	1	25.96	15	32	0.0046	R	ARFEELNMDLFR	K	Oxidation (M)	0.000000030000.0			File4260 Spectrum515746 scans: 26839	126/130C	---	127c/130C	---	128c/130C	---	129c/130C	---	131/130C	---	127n/130C	---	128n/130C	---	129n/130C	---
1	2	Pavir.Ia03670.1.p|PACid:30213866	Pavir.Ia03670.1.p|PACid:30213866	3226	83084	188	188	23	23	37.8	5.13	305965	1	0	0	595.977	1784.91	3	1784.91	0.0013	1	36.89	18	32	0.00069	R	ARFEELNMDLFR	K	Oxidation (M)	0.000000030000.0			File4258 Spectrum429573 scans: 27518	126/130C	---	127c/130C	---	128c/130C	---	129c/130C	---	131/130C	---	127n/130C	---	128n/130C	---	129n/130C	---
1	2	Pavir.Ia03670.1.p|PACid:30213866	Pavir.Ia03670.1.p|PACid:30213866	3226	83084	188	188	23	23	37.8	5.13	305971	1	0	0	595.977	1784.91	3	1784.91	0.0018	1	27.89	20	32	0.0085	R	ARFEELNMDLFR	K	Oxidation (M)	0.000000030000.0			File4259 Spectrum474681 scans: 29077	126/130C	---	127c/130C	---	128c/130C	---	129c/130C	---	131/130C	---	127n/130C	---	128n/130C	---	129n/130C	---
1	2	Pavir.Ia03670.1.p|PACid:30213866	Pavir.Ia03670.1.p|PACid:30213866	3226	83084	188	188	23	23	37.8	5.13	305973	1	0	0	595.977	1784.91	3	1784.91	0.002	1	25.18	17	32	0.008	R	ARFEELNMDLFR	K	Oxidation (M)	0.000000030000.0			File4253 Spectrum236936 scans: 26143	126/130C	---	127c/130C	---	128c/130C	---	129c/130C	---	131/130C	---	127n/130C	---	128n/130C	---	129n/130C	---
1	2	Pavir.Ia03670.1.p|PACid:30213866	Pavir.Ia03670.1.p|PACid:30213866	3226	83084	188	188	23	23	37.8	5.13	305974	1	0	0	595.977	1784.91	3	1784.91	0.0022	1	34.7	20	32	0.0018	R	ARFEELNMDLFR	K	Oxidation (M)	0.000000030000.0			File4259 Spectrum474454 scans: 28823	126/130C	---	127c/130C	---	128c/130C	---	129c/130C	---	131/130C	---	127n/130C	---	128n/130C	---	129n/130C	---
1	2	Pavir.Ia03670.1.p|PACid:30213866	Pavir.Ia03670.1.p|PACid:30213866	3226	83084	188	188	23	23	37.8	5.13	305976	1	0	0	595.978	1784.91	3	1784.91	0.0029	1	33.84	22	32	0.0036	R	ARFEELNMDLFR	K	Oxidation (M)	0.000000030000.0			File4253 Spectrum236694 scans: 25877	126/130C	---	127c/130C	---	128c/130C	---	129c/130C	---	131/130C	---	127n/130C	---	128n/130C	---	129n/130C	---
1	2	Pavir.Ia03670.1.p|PACid:30213866	Pavir.Ia03670.1.p|PACid:30213866	3226	83084	188	188	23	23	37.8	5.13	314215	1	0	0	902.51	1803.01	2	1803	0.0016	0	32.56	21	33	0.0037	K	ELEGICNPIIAK	M	Methylthio (C)	0.000002000000.0			File4251 Spectrum160450 scans: 36148	126/130C	---	127c/130C	---	128c/130C	---	129c/130C	---	131/130C	---	127n/130C	---	128n/130C	---	129n/130C	---
1	2	Pavir.Ia03670.1.p|PACid:30213866	Pavir.Ia03670.1.p|PACid:30213866	3226	83084	188	188	23	23	37.8	5.13	314218	1	0	0	902.51	1803.01	2	1803	0.0019	0	39.09	20	33	0.00063	K	ELEGICNPIIAK	M	Methylthio (C)	0.000002000000.0			File4251 Spectrum161132 scans: 36931	126/130C	---	127c/130C	---	128c/130C	---	129c/130C	---	131/130C	---	127n/130C	---	128n/130C	---	129n/130C	---
1	2	Pavir.Ia03670.1.p|PACid:30213866	Pavir.Ia03670.1.p|PACid:30213866	3226	83084	188	188	23	23	37.8	5.13	314220	1	0	0	902.51	1803.01	2	1803	0.002	0	24.59	16	33	0.0079	K	ELEGICNPIIAK	M	Methylthio (C)	0.000002000000.0			File4251 Spectrum161349 scans: 37180	126/130C	---	127c/130C	---	128c/130C	---	129c/130C	---	131/130C	---	127n/130C	---	128n/130C	---	129n/130C	---
1	2	Pavir.Ia03670.1.p|PACid:30213866	Pavir.Ia03670.1.p|PACid:30213866	3226	83084	188	188	23	23	37.8	5.13	355078	1	0	0	952.951	1903.89	2	1903.89	0.001	0	30.01	19	29	0.0046	K	ATAGDTHLGGEDFDNR	L					File4250 Spectrum94882 scans: 12304	126/130C	---	127c/130C	---	128c/130C	---	129c/130C	---	131/130C	---	127n/130C	---	128n/130C	---	129n/130C	---
1	2	Pavir.Ia03670.1.p|PACid:30213866	Pavir.Ia03670.1.p|PACid:30213866	3226	83084	188	188	23	23	37.8	5.13	355082	1	0	0	635.636	1903.89	3	1903.89	0.0011	0	26.6	19	29	0.0093	K	ATAGDTHLGGEDFDNR	L					File4249 Spectrum50395 scans: 11953	126/130C	---	127c/130C	---	128c/130C	---	129c/130C	---	131/130C	---	127n/130C	---	128n/130C	---	129n/130C	---
1	2	Pavir.Ia03670.1.p|PACid:30213866	Pavir.Ia03670.1.p|PACid:30213866	3226	83084	188	188	23	23	37.8	5.13	355084	1	0	0	952.951	1903.89	2	1903.89	0.0012	0	48.47	23	29	0.00014	K	ATAGDTHLGGEDFDNR	L					File4264 Spectrum678852 scans: 12447	126/130C	---	127c/130C	---	128c/130C	---	129c/130C	---	131/130C	---	127n/130C	---	128n/130C	---	129n/130C	---
1	2	Pavir.Ia03670.1.p|PACid:30213866	Pavir.Ia03670.1.p|PACid:30213866	3226	83084	188	188	23	23	37.8	5.13	355090	1	0	0	635.636	1903.89	3	1903.89	0.0012	0	25.43	17	29	0.0087	K	ATAGDTHLGGEDFDNR	L					File4264 Spectrum678841 scans: 12436	126/130C	---	127c/130C	---	128c/130C	---	129c/130C	---	131/130C	---	127n/130C	---	128n/130C	---	129n/130C	---
1	2	Pavir.Ia03670.1.p|PACid:30213866	Pavir.Ia03670.1.p|PACid:30213866	3226	83084	188	188	23	23	37.8	5.13	355099	1	0	0	635.636	1903.89	3	1903.89	0.0015	0	28.43	19	29	0.0061	K	ATAGDTHLGGEDFDNR	L					File4264 Spectrum678589 scans: 12161	126/130C	---	127c/130C	---	128c/130C	---	129c/130C	---	131/130C	---	127n/130C	---	128n/130C	---	129n/130C	---
1	2	Pavir.Ia03670.1.p|PACid:30213866	Pavir.Ia03670.1.p|PACid:30213866	3226	83084	188	188	23	23	37.8	5.13	355117	1	0	0	635.637	1903.89	3	1903.89	0.0018	0	24.56	15	29	0.006	K	ATAGDTHLGGEDFDNR	L					File4251 Spectrum138939 scans: 12369	126/130C	---	127c/130C	---	128c/130C	---	129c/130C	---	131/130C	---	127n/130C	---	128n/130C	---	129n/130C	---
1	2	Pavir.Ia03670.1.p|PACid:30213866	Pavir.Ia03670.1.p|PACid:30213866	3226	83084	188	188	23	23	37.8	5.13	355120	1	0	0	952.951	1903.89	2	1903.89	0.002	0	25.57	14	29	0.004	K	ATAGDTHLGGEDFDNR	L					File4264 Spectrum678687 scans: 12267	126/130C	---	127c/130C	---	128c/130C	---	129c/130C	---	131/130C	---	127n/130C	---	128n/130C	---	129n/130C	---
1	2	Pavir.Ia03670.1.p|PACid:30213866	Pavir.Ia03670.1.p|PACid:30213866	3226	83084	188	188	23	23	37.8	5.13	355125	1	0	0	635.637	1903.89	3	1903.89	0.002	0	28.51	18	29	0.0046	K	ATAGDTHLGGEDFDNR	L					File4249 Spectrum81797 scans: 46743	126/130C	---	127c/130C	---	128c/130C	---	129c/130C	---	131/130C	---	127n/130C	---	128n/130C	---	129n/130C	---
1	2	Pavir.Ia03670.1.p|PACid:30213866	Pavir.Ia03670.1.p|PACid:30213866	3226	83084	188	188	23	23	37.8	5.13	355126	1	0	0	635.637	1903.89	3	1903.89	0.002	0	23.11	14	29	0.0068	K	ATAGDTHLGGEDFDNR	L					File4249 Spectrum82164 scans: 47167	126/130C	---	127c/130C	---	128c/130C	---	129c/130C	---	131/130C	---	127n/130C	---	128n/130C	---	129n/130C	---
1	2	Pavir.Ia03670.1.p|PACid:30213866	Pavir.Ia03670.1.p|PACid:30213866	3226	83084	188	188	23	23	37.8	5.13	355137	1	0	0	952.952	1903.89	2	1903.89	0.0023	0	72.14	24	29	8.5e-07	K	ATAGDTHLGGEDFDNR	L					File4249 Spectrum50647 scans: 12237	126/130C	---	127c/130C	---	128c/130C	---	129c/130C	---	131/130C	---	127n/130C	---	128n/130C	---	129n/130C	---
1	2	Pavir.Ia03670.1.p|PACid:30213866	Pavir.Ia03670.1.p|PACid:30213866	3226	83084	188	188	23	23	37.8	5.13	355147	1	0	0	635.637	1903.89	3	1903.89	0.0025	0	29.63	21	29	0.0086	K	ATAGDTHLGGEDFDNR	L					File4249 Spectrum50625 scans: 12212	126/130C	---	127c/130C	---	128c/130C	---	129c/130C	---	131/130C	---	127n/130C	---	128n/130C	---	129n/130C	---
1	2	Pavir.Ia03670.1.p|PACid:30213866	Pavir.Ia03670.1.p|PACid:30213866	3226	83084	188	188	23	23	37.8	5.13	355151	1	0	0	952.952	1903.89	2	1903.89	0.0029	0	23.56	14	29	0.0062	K	ATAGDTHLGGEDFDNR	L					File4249 Spectrum50578 scans: 12158	126/130C	---	127c/130C	---	128c/130C	---	129c/130C	---	131/130C	---	127n/130C	---	128n/130C	---	129n/130C	---
1	2	Pavir.Ia03670.1.p|PACid:30213866	Pavir.Ia03670.1.p|PACid:30213866	3226	83084	188	188	23	23	37.8	5.13	355153	1	0	0	952.952	1903.89	2	1903.89	0.0032	0	26.18	18	29	0.0082	K	ATAGDTHLGGEDFDNR	L					File4255 Spectrum309583 scans: 11602	126/130C	---	127c/130C	---	128c/130C	---	129c/130C	---	131/130C	---	127n/130C	---	128n/130C	---	129n/130C	---
1	2	Pavir.Ia03670.1.p|PACid:30213866	Pavir.Ia03670.1.p|PACid:30213866	3226	83084	188	188	23	23	37.8	5.13	355155	1	0	0	952.952	1903.89	2	1903.89	0.0033	0	46.57	22	29	0.0002	K	ATAGDTHLGGEDFDNR	L					File4249 Spectrum50421 scans: 11981	126/130C	---	127c/130C	---	128c/130C	---	129c/130C	---	131/130C	---	127n/130C	---	128n/130C	---	129n/130C	---
1	2	Pavir.Ia03670.1.p|PACid:30213866	Pavir.Ia03670.1.p|PACid:30213866	3226	83084	188	188	23	23	37.8	5.13	355156	1	0	0	952.952	1903.89	2	1903.89	0.0035	0	49.46	23	29	0.00012	K	ATAGDTHLGGEDFDNR	L					File4264 Spectrum678597 scans: 12169	126/130C	---	127c/130C	---	128c/130C	---	129c/130C	---	131/130C	---	127n/130C	---	128n/130C	---	129n/130C	---
1	2	Pavir.Ia03670.1.p|PACid:30213866	Pavir.Ia03670.1.p|PACid:30213866	3226	83084	188	188	23	23	37.8	5.13	357176	1	0	0	955.503	1908.99	2	1908.99	0.0018	0	50.02	20	33	5.5e-05	K	NAVVTVPAYFNDSQR	Q					File4248 Spectrum20614 scans: 24485	126/130C	---	127c/130C	---	128c/130C	---	129c/130C	---	131/130C	---	127n/130C	---	128n/130C	---	129n/130C	---
1	2	Pavir.Ia03670.1.p|PACid:30213866	Pavir.Ia03670.1.p|PACid:30213866	3226	83084	188	188	23	23	37.8	5.13	357181	1	0	0	955.503	1908.99	2	1908.99	0.0024	0	63.11	30	33	2.5e-05	K	NAVVTVPAYFNDSQR	Q					File4248 Spectrum20373 scans: 24222	126/130C	---	127c/130C	---	128c/130C	---	129c/130C	---	131/130C	---	127n/130C	---	128n/130C	---	129n/130C	---
1	2	Pavir.Ia03670.1.p|PACid:30213866	Pavir.Ia03670.1.p|PACid:30213866	3226	83084	188	188	23	23	37.8	5.13	357187	1	0	0	637.338	1908.99	3	1908.99	0.0031	0	31.81	14	33	0.001	K	NAVVTVPAYFNDSQR	Q					File4248 Spectrum20415 scans: 24268	126/130C	---	127c/130C	---	128c/130C	---	129c/130C	---	131/130C	---	127n/130C	---	128n/130C	---	129n/130C	---
1	2	Pavir.Ia03670.1.p|PACid:30213866	Pavir.Ia03670.1.p|PACid:30213866	3226	83084	188	188	23	23	37.8	5.13	357511	1	0	0	955.995	1909.98	2	1909.97	0.0019	0	29.01	15	33	0.0023	K	NAVVTVPAYFNDSQR	Q	Deamidated (NQ)	0.000000000010000.0			File4252 Spectrum194091 scans: 25874	126/130C	---	127c/130C	---	128c/130C	---	129c/130C	---	131/130C	---	127n/130C	---	128n/130C	---	129n/130C	---
1	2	Pavir.Ia03670.1.p|PACid:30213866	Pavir.Ia03670.1.p|PACid:30213866	3226	83084	188	188	23	23	37.8	5.13	357513	1	0	0	637.666	1909.98	3	1909.97	0.002	0	40.26	16	33	0.0002	K	NAVVTVPAYFNDSQR	Q	Deamidated (NQ)	0.000000000010000.0			File4253 Spectrum236682 scans: 25863	126/130C	---	127c/130C	---	128c/130C	---	129c/130C	---	131/130C	---	127n/130C	---	128n/130C	---	129n/130C	---
1	2	Pavir.Ia03670.1.p|PACid:30213866	Pavir.Ia03670.1.p|PACid:30213866	3226	83084	188	188	23	23	37.8	5.13	434546	1	0	0	706.745	2117.21	3	2117.21	0	0	27.74	16	33	0.004	R	IINEPTAAAIAYGLDK	K					File4262 Spectrum613316 scans: 36497	126/130C	---	127c/130C	---	128c/130C	---	129c/130C	---	131/130C	---	127n/130C	---	128n/130C	---	129n/130C	---
1	2	Pavir.Ia03670.1.p|PACid:30213866	Pavir.Ia03670.1.p|PACid:30213866	3226	83084	188	188	23	23	37.8	5.13	434552	1	0	0	706.745	2117.21	3	2117.21	0.0009	0	25.13	14	33	0.0044	R	IINEPTAAAIAYGLDK	K					File4263 Spectrum657457 scans: 36836	126/130C	---	127c/130C	---	128c/130C	---	129c/130C	---	131/130C	---	127n/130C	---	128n/130C	---	129n/130C	---
1	2	Pavir.Ia03670.1.p|PACid:30213866	Pavir.Ia03670.1.p|PACid:30213866	3226	83084	188	188	23	23	37.8	5.13	434557	1	0	0	1059.62	2117.22	2	2117.21	0.0017	0	89.12	26	33	2.9e-08	R	IINEPTAAAIAYGLDK	K					File4263 Spectrum656566 scans: 35811	126/130C	---	127c/130C	---	128c/130C	---	129c/130C	---	131/130C	---	127n/130C	---	128n/130C	---	129n/130C	---
1	2	Pavir.Ia03670.1.p|PACid:30213866	Pavir.Ia03670.1.p|PACid:30213866	3226	83084	188	188	23	23	37.8	5.13	434558	1	0	0	706.746	2117.22	3	2117.21	0.0018	0	28.56	18	33	0.0048	R	IINEPTAAAIAYGLDK	K					File4263 Spectrum657247 scans: 36586	126/130C	---	127c/130C	---	128c/130C	---	129c/130C	---	131/130C	---	127n/130C	---	128n/130C	---	129n/130C	---
1	2	Pavir.Ia03670.1.p|PACid:30213866	Pavir.Ia03670.1.p|PACid:30213866	3226	83084	188	188	23	23	37.8	5.13	434563	1	0	0	706.746	2117.22	3	2117.21	0.0021	0	41.05	23	33	0.00084	R	IINEPTAAAIAYGLDK	K					File4262 Spectrum612447 scans: 35535	126/130C	---	127c/130C	---	128c/130C	---	129c/130C	---	131/130C	---	127n/130C	---	128n/130C	---	129n/130C	---
1	2	Pavir.Ia03670.1.p|PACid:30213866	Pavir.Ia03670.1.p|PACid:30213866	3226	83084	188	188	23	23	37.8	5.13	434564	1	0	0	706.746	2117.22	3	2117.21	0.0021	0	27.8	17	33	0.005	R	IINEPTAAAIAYGLDK	K					File4264 Spectrum699868 scans: 35324	126/130C	---	127c/130C	---	128c/130C	---	129c/130C	---	131/130C	---	127n/130C	---	128n/130C	---	129n/130C	---
1	2	Pavir.Ia03670.1.p|PACid:30213866	Pavir.Ia03670.1.p|PACid:30213866	3226	83084	188	188	23	23	37.8	5.13	434568	1	0	0	706.746	2117.22	3	2117.21	0.0023	0	30.93	22	33	0.007	R	IINEPTAAAIAYGLDK	K					File4263 Spectrum657027 scans: 36335	126/130C	---	127c/130C	---	128c/130C	---	129c/130C	---	131/130C	---	127n/130C	---	128n/130C	---	129n/130C	---
1	2	Pavir.Ia03670.1.p|PACid:30213866	Pavir.Ia03670.1.p|PACid:30213866	3226	83084	188	188	23	23	37.8	5.13	434569	1	0	0	706.746	2117.22	3	2117.21	0.0023	0	37.09	21	33	0.0013	R	IINEPTAAAIAYGLDK	K					File4263 Spectrum656808 scans: 36086	126/130C	---	127c/130C	---	128c/130C	---	129c/130C	---	131/130C	---	127n/130C	---	128n/130C	---	129n/130C	---
1	2	Pavir.Ia03670.1.p|PACid:30213866	Pavir.Ia03670.1.p|PACid:30213866	3226	83084	188	188	23	23	37.8	5.13	434571	1	0	0	706.746	2117.22	3	2117.21	0.0025	0	36.61	17	33	0.00056	R	IINEPTAAAIAYGLDK	K					File4263 Spectrum656356 scans: 35571	126/130C	---	127c/130C	---	128c/130C	---	129c/130C	---	131/130C	---	127n/130C	---	128n/130C	---	129n/130C	---
1	2	Pavir.Ia03670.1.p|PACid:30213866	Pavir.Ia03670.1.p|PACid:30213866	3226	83084	188	188	23	23	37.8	5.13	434580	1	0	0	1059.62	2117.22	2	2117.21	0.0039	0	55.29	27	33	7.5e-05	R	IINEPTAAAIAYGLDK	K					File4262 Spectrum612488 scans: 35580	126/130C	---	127c/130C	---	128c/130C	---	129c/130C	---	131/130C	---	127n/130C	---	128n/130C	---	129n/130C	---
1	2	Pavir.Ia03670.1.p|PACid:30213866	Pavir.Ia03670.1.p|PACid:30213866	3226	83084	188	188	23	23	37.8	5.13	434581	1	0	0	706.746	2117.22	3	2117.21	0.004	0	36.39	18	33	0.00079	R	IINEPTAAAIAYGLDK	K					File4263 Spectrum656581 scans: 35828	126/130C	---	127c/130C	---	128c/130C	---	129c/130C	---	131/130C	---	127n/130C	---	128n/130C	---	129n/130C	---
1	2	Pavir.Ia03670.1.p|PACid:30213866	Pavir.Ia03670.1.p|PACid:30213866	3226	83084	188	188	23	23	37.8	5.13	434582	1	0	0	706.746	2117.22	3	2117.21	0.004	0	35.95	16	33	0.00054	R	IINEPTAAAIAYGLDK	K					File4249 Spectrum71622 scans: 35126	126/130C	---	127c/130C	---	128c/130C	---	129c/130C	---	131/130C	---	127n/130C	---	128n/130C	---	129n/130C	---
1	2	Pavir.Ia03670.1.p|PACid:30213866	Pavir.Ia03670.1.p|PACid:30213866	3226	83084	188	188	23	23	37.8	5.13	434587	1	0	0	1059.62	2117.22	2	2117.21	0.0061	0	42.64	26	33	0.0011	R	IINEPTAAAIAYGLDK	K					File4262 Spectrum612243 scans: 35310	126/130C	---	127c/130C	---	128c/130C	---	129c/130C	---	131/130C	---	127n/130C	---	128n/130C	---	129n/130C	---
1	2	Pavir.Ia03670.1.p|PACid:30213866	Pavir.Ia03670.1.p|PACid:30213866	3226	83084	188	188	23	23	37.8	5.13	435104	1	0	0	1060.58	2119.15	2	2119.15	0.0013	0	28.83	19	34	0.0059	K	NQVAMNPINTVFDAK	R					File4263 Spectrum652843 scans: 31630	126/130C	---	127c/130C	---	128c/130C	---	129c/130C	---	131/130C	---	127n/130C	---	128n/130C	---	129n/130C	---
1	2	Pavir.Ia03670.1.p|PACid:30213866	Pavir.Ia03670.1.p|PACid:30213866	3226	83084	188	188	23	23	37.8	5.13	435106	1	0	0	707.391	2119.15	3	2119.15	0.0021	0	26.73	19	34	0.009	K	NQVAMNPINTVFDAK	R					File4264 Spectrum696164 scans: 31269	126/130C	---	127c/130C	---	128c/130C	---	129c/130C	---	131/130C	---	127n/130C	---	128n/130C	---	129n/130C	---
1	2	Pavir.Ia03670.1.p|PACid:30213866	Pavir.Ia03670.1.p|PACid:30213866	3226	83084	188	188	23	23	37.8	5.13	439484	1	0	0	712.074	2133.2	3	2133.2	0.0014	1	23.4	15	33	0.0073	R	QATKDAGVISGLNVMR	I	Oxidation (M)	0.0000000000000030.0			File4260 Spectrum507927 scans: 18342	126/130C	---	127c/130C	---	128c/130C	---	129c/130C	---	131/130C	---	127n/130C	---	128n/130C	---	129n/130C	---
1	2	Pavir.Ia03670.1.p|PACid:30213866	Pavir.Ia03670.1.p|PACid:30213866	3226	83084	188	188	23	23	37.8	5.13	439485	1	0	0	712.074	2133.2	3	2133.2	0.0027	1	25.16	15	33	0.0059	R	QATKDAGVISGLNVMR	I	Oxidation (M)	0.0000000000000030.0			File4264 Spectrum684096 scans: 18148	126/130C	---	127c/130C	---	128c/130C	---	129c/130C	---	131/130C	---	127n/130C	---	128n/130C	---	129n/130C	---
1	2	Pavir.Ia03670.1.p|PACid:30213866	Pavir.Ia03670.1.p|PACid:30213866	3226	83084	188	188	23	23	37.8	5.13	440064	1	0	0	1068.58	2135.15	2	2135.15	0	0	36.95	25	34	0.004	K	NQVAMNPINTVFDAK	R	Oxidation (M)	0.000030000000000.0			File4260 Spectrum516860 scans: 28055	126/130C	---	127c/130C	---	128c/130C	---	129c/130C	---	131/130C	---	127n/130C	---	128n/130C	---	129n/130C	---
1	2	Pavir.Ia03670.1.p|PACid:30213866	Pavir.Ia03670.1.p|PACid:30213866	3226	83084	188	188	23	23	37.8	5.13	440070	1	0	0	712.723	2135.15	3	2135.15	0.0011	0	28.57	20	34	0.0081	K	NQVAMNPINTVFDAK	R	Oxidation (M)	0.000030000000000.0			File4260 Spectrum516450 scans: 27608	126/130C	---	127c/130C	---	128c/130C	---	129c/130C	---	131/130C	---	127n/130C	---	128n/130C	---	129n/130C	---
1	2	Pavir.Ia03670.1.p|PACid:30213866	Pavir.Ia03670.1.p|PACid:30213866	3226	83084	188	188	23	23	37.8	5.13	440071	1	0	0	712.723	2135.15	3	2135.15	0.0011	0	30.1	16	34	0.002	K	NQVAMNPINTVFDAK	R	Oxidation (M)	0.000030000000000.0			File4260 Spectrum516952 scans: 28155	126/130C	---	127c/130C	---	128c/130C	---	129c/130C	---	131/130C	---	127n/130C	---	128n/130C	---	129n/130C	---
1	2	Pavir.Ia03670.1.p|PACid:30213866	Pavir.Ia03670.1.p|PACid:30213866	3226	83084	188	188	23	23	37.8	5.13	440076	1	0	0	712.723	2135.15	3	2135.15	0.0016	0	31.39	16	34	0.0015	K	NQVAMNPINTVFDAK	R	Oxidation (M)	0.000030000000000.0			File4263 Spectrum649541 scans: 27983	126/130C	---	127c/130C	---	128c/130C	---	129c/130C	---	131/130C	---	127n/130C	---	128n/130C	---	129n/130C	---
1	2	Pavir.Ia03670.1.p|PACid:30213866	Pavir.Ia03670.1.p|PACid:30213866	3226	83084	188	188	23	23	37.8	5.13	440077	1	0	0	712.723	2135.15	3	2135.15	0.0016	0	30.58	19	34	0.0036	K	NQVAMNPINTVFDAK	R	Oxidation (M)	0.000030000000000.0			File4259 Spectrum474005 scans: 28322	126/130C	---	127c/130C	---	128c/130C	---	129c/130C	---	131/130C	---	127n/130C	---	128n/130C	---	129n/130C	---
1	2	Pavir.Ia03670.1.p|PACid:30213866	Pavir.Ia03670.1.p|PACid:30213866	3226	83084	188	188	23	23	37.8	5.13	440079	1	0	0	712.723	2135.15	3	2135.15	0.0018	0	30.98	19	34	0.0034	K	NQVAMNPINTVFDAK	R	Oxidation (M)	0.000030000000000.0			File4264 Spectrum692772 scans: 27577	126/130C	---	127c/130C	---	128c/130C	---	129c/130C	---	131/130C	---	127n/130C	---	128n/130C	---	129n/130C	---
1	2	Pavir.Ia03670.1.p|PACid:30213866	Pavir.Ia03670.1.p|PACid:30213866	3226	83084	188	188	23	23	37.8	5.13	440082	1	0	0	712.723	2135.15	3	2135.15	0.002	0	45.21	22	34	0.00028	K	NQVAMNPINTVFDAK	R	Oxidation (M)	0.000030000000000.0			File4263 Spectrum649615 scans: 28063	126/130C	---	127c/130C	---	128c/130C	---	129c/130C	---	131/130C	---	127n/130C	---	128n/130C	---	129n/130C	---
1	2	Pavir.Ia03670.1.p|PACid:30213866	Pavir.Ia03670.1.p|PACid:30213866	3226	83084	188	188	23	23	37.8	5.13	440083	1	0	0	1068.58	2135.15	2	2135.15	0.002	0	43.34	19	34	0.00019	K	NQVAMNPINTVFDAK	R	Oxidation (M)	0.000030000000000.0			File4259 Spectrum473961 scans: 28273	126/130C	---	127c/130C	---	128c/130C	---	129c/130C	---	131/130C	---	127n/130C	---	128n/130C	---	129n/130C	---
1	2	Pavir.Ia03670.1.p|PACid:30213866	Pavir.Ia03670.1.p|PACid:30213866	3226	83084	188	188	23	23	37.8	5.13	440085	1	0	0	712.723	2135.15	3	2135.15	0.0022	0	24.28	16	34	0.0093	K	NQVAMNPINTVFDAK	R	Oxidation (M)	0.000030000000000.0			File4263 Spectrum649291 scans: 27709	126/130C	---	127c/130C	---	128c/130C	---	129c/130C	---	131/130C	---	127n/130C	---	128n/130C	---	129n/130C	---
1	2	Pavir.Ia03670.1.p|PACid:30213866	Pavir.Ia03670.1.p|PACid:30213866	3226	83084	188	188	23	23	37.8	5.13	440088	1	0	0	1068.58	2135.15	2	2135.15	0.0022	0	61.57	29	34	3.3e-05	K	NQVAMNPINTVFDAK	R	Oxidation (M)	0.000030000000000.0			File4264 Spectrum693010 scans: 27836	126/130C	---	127c/130C	---	128c/130C	---	129c/130C	---	131/130C	---	127n/130C	---	128n/130C	---	129n/130C	---
1	2	Pavir.Ia03670.1.p|PACid:30213866	Pavir.Ia03670.1.p|PACid:30213866	3226	83084	188	188	23	23	37.8	5.13	440090	1	0	0	712.723	2135.15	3	2135.15	0.0023	0	32.96	21	34	0.0032	K	NQVAMNPINTVFDAK	R	Oxidation (M)	0.000030000000000.0			File4259 Spectrum473902 scans: 28207	126/130C	---	127c/130C	---	128c/130C	---	129c/130C	---	131/130C	---	127n/130C	---	128n/130C	---	129n/130C	---
1	2	Pavir.Ia03670.1.p|PACid:30213866	Pavir.Ia03670.1.p|PACid:30213866	3226	83084	188	188	23	23	37.8	5.13	440093	1	0	0	1068.58	2135.15	2	2135.15	0.0025	0	55.42	24	34	3.8e-05	K	NQVAMNPINTVFDAK	R	Oxidation (M)	0.000030000000000.0			File4263 Spectrum649485 scans: 27921	126/130C	---	127c/130C	---	128c/130C	---	129c/130C	---	131/130C	---	127n/130C	---	128n/130C	---	129n/130C	---
1	2	Pavir.Ia03670.1.p|PACid:30213866	Pavir.Ia03670.1.p|PACid:30213866	3226	83084	188	188	23	23	37.8	5.13	440094	1	0	0	1068.58	2135.15	2	2135.15	0.0025	0	59.23	23	34	1.2e-05	K	NQVAMNPINTVFDAK	R	Oxidation (M)	0.000030000000000.0			File4260 Spectrum516617 scans: 27790	126/130C	---	127c/130C	---	128c/130C	---	129c/130C	---	131/130C	---	127n/130C	---	128n/130C	---	129n/130C	---
1	2	Pavir.Ia03670.1.p|PACid:30213866	Pavir.Ia03670.1.p|PACid:30213866	3226	83084	188	188	23	23	37.8	5.13	440096	1	0	0	712.723	2135.15	3	2135.15	0.0025	0	29.05	16	34	0.0028	K	NQVAMNPINTVFDAK	R	Oxidation (M)	0.000030000000000.0			File4259 Spectrum474130 scans: 28461	126/130C	---	127c/130C	---	128c/130C	---	129c/130C	---	131/130C	---	127n/130C	---	128n/130C	---	129n/130C	---
1	2	Pavir.Ia03670.1.p|PACid:30213866	Pavir.Ia03670.1.p|PACid:30213866	3226	83084	188	188	23	23	37.8	5.13	440097	1	0	0	712.723	2135.15	3	2135.15	0.0025	0	28.48	15	34	0.0026	K	NQVAMNPINTVFDAK	R	Oxidation (M)	0.000030000000000.0			File4264 Spectrum693277 scans: 28127	126/130C	---	127c/130C	---	128c/130C	---	129c/130C	---	131/130C	---	127n/130C	---	128n/130C	---	129n/130C	---
1	2	Pavir.Ia03670.1.p|PACid:30213866	Pavir.Ia03670.1.p|PACid:30213866	3226	83084	188	188	23	23	37.8	5.13	440104	1	0	0	712.723	2135.15	3	2135.15	0.0029	0	45.72	21	34	0.00017	K	NQVAMNPINTVFDAK	R	Oxidation (M)	0.000030000000000.0			File4260 Spectrum516699 scans: 27879	126/130C	---	127c/130C	---	128c/130C	---	129c/130C	---	131/130C	---	127n/130C	---	128n/130C	---	129n/130C	---
1	2	Pavir.Ia03670.1.p|PACid:30213866	Pavir.Ia03670.1.p|PACid:30213866	3226	83084	188	188	23	23	37.8	5.13	440113	1	0	0	1068.58	2135.15	2	2135.15	0.0044	0	30.97	18	34	0.0027	K	NQVAMNPINTVFDAK	R	Oxidation (M)	0.000030000000000.0			File4264 Spectrum693271 scans: 28121	126/130C	---	127c/130C	---	128c/130C	---	129c/130C	---	131/130C	---	127n/130C	---	128n/130C	---	129n/130C	---
1	2	Pavir.Ia03670.1.p|PACid:30213866	Pavir.Ia03670.1.p|PACid:30213866	3226	83084	188	188	23	23	37.8	5.13	440380	1	0	0	713.051	2136.13	3	2136.13	0.0018	0	28.99	18	34	0.0043	K	NQVAMNPINTVFDAK	R	Deamidated (NQ); Oxidation (M)	0.100030000000000.0			File4259 Spectrum475279 scans: 29748	126/130C	---	127c/130C	---	128c/130C	---	129c/130C	---	131/130C	---	127n/130C	---	128n/130C	---	129n/130C	---
1	2	Pavir.Ia03670.1.p|PACid:30213866	Pavir.Ia03670.1.p|PACid:30213866	3226	83084	188	188	23	23	37.8	5.13	440382	1	0	0	713.051	2136.13	3	2136.13	0.0025	0	31.76	21	34	0.0051	K	NQVAMNPINTVFDAK	R	Deamidated (NQ); Oxidation (M)	0.010030000000000.0			File4259 Spectrum475010 scans: 29445	126/130C	---	127c/130C	---	128c/130C	---	129c/130C	---	131/130C	---	127n/130C	---	128n/130C	---	129n/130C	---
1	2	Pavir.Ia03670.1.p|PACid:30213866	Pavir.Ia03670.1.p|PACid:30213866	3226	83084	188	188	23	23	37.8	5.13	440384	1	0	0	713.051	2136.13	3	2136.13	0.0027	0	25.64	17	34	0.0076	K	NQVAMNPINTVFDAK	R	Deamidated (NQ); Oxidation (M)	0.100030000000000.0			File4259 Spectrum475506 scans: 30003	126/130C	---	127c/130C	---	128c/130C	---	129c/130C	---	131/130C	---	127n/130C	---	128n/130C	---	129n/130C	---
1	2	Pavir.Ia03670.1.p|PACid:30213866	Pavir.Ia03670.1.p|PACid:30213866	3226	83084	188	188	23	23	37.8	5.13	440385	1	0	0	713.051	2136.13	3	2136.13	0.0027	0	27.99	17	34	0.0043	K	NQVAMNPINTVFDAK	R	Deamidated (NQ); Oxidation (M)	0.100030000000000.0			File4248 Spectrum23953 scans: 28142	126/130C	---	127c/130C	---	128c/130C	---	129c/130C	---	131/130C	---	127n/130C	---	128n/130C	---	129n/130C	---
1	2	Pavir.Ia03670.1.p|PACid:30213866	Pavir.Ia03670.1.p|PACid:30213866	3226	83084	188	188	23	23	37.8	5.13	440391	1	0	0	713.052	2136.13	3	2136.13	0.0042	0	28.98	17	34	0.0034	K	NQVAMNPINTVFDAK	R	Deamidated (NQ); Oxidation (M)	0.100030000000000.0			File4258 Spectrum431654 scans: 29799	126/130C	---	127c/130C	---	128c/130C	---	129c/130C	---	131/130C	---	127n/130C	---	128n/130C	---	129n/130C	---
1	2	Pavir.Ia03670.1.p|PACid:30213866	Pavir.Ia03670.1.p|PACid:30213866	3226	83084	188	188	23	23	37.8	5.13	482379	1	0	0	759.425	2275.25	3	2275.25	0.0019	1	50.39	16	34	1.9e-05	K	NQVAMNPINTVFDAKR	L					File4253 Spectrum238090 scans: 27415	126/130C	---	127c/130C	---	128c/130C	---	129c/130C	---	131/130C	---	127n/130C	---	128n/130C	---	129n/130C	---
1	2	Pavir.Ia03670.1.p|PACid:30213866	Pavir.Ia03670.1.p|PACid:30213866	3226	83084	188	188	23	23	37.8	5.13	482380	1	0	0	759.425	2275.25	3	2275.25	0.0021	1	47.28	20	34	0.0001	K	NQVAMNPINTVFDAKR	L					File4253 Spectrum238024 scans: 27342	126/130C	---	127c/130C	---	128c/130C	---	129c/130C	---	131/130C	---	127n/130C	---	128n/130C	---	129n/130C	---
1	2	Pavir.Ia03670.1.p|PACid:30213866	Pavir.Ia03670.1.p|PACid:30213866	3226	83084	188	188	23	23	37.8	5.13	482383	1	0	0	759.425	2275.25	3	2275.25	0.0023	1	35.39	15	34	0.00054	K	NQVAMNPINTVFDAKR	L					File4253 Spectrum237603 scans: 26875	126/130C	---	127c/130C	---	128c/130C	---	129c/130C	---	131/130C	---	127n/130C	---	128n/130C	---	129n/130C	---
1	2	Pavir.Ia03670.1.p|PACid:30213866	Pavir.Ia03670.1.p|PACid:30213866	3226	83084	188	188	23	23	37.8	5.13	482385	1	0	0	759.425	2275.25	3	2275.25	0.0023	1	35.47	18	34	0.00098	K	NQVAMNPINTVFDAKR	L					File4252 Spectrum195462 scans: 27385	126/130C	---	127c/130C	---	128c/130C	---	129c/130C	---	131/130C	---	127n/130C	---	128n/130C	---	129n/130C	---
1	2	Pavir.Ia03670.1.p|PACid:30213866	Pavir.Ia03670.1.p|PACid:30213866	3226	83084	188	188	23	23	37.8	5.13	482386	1	0	0	759.425	2275.25	3	2275.25	0.0024	1	35.32	15	34	0.00049	K	NQVAMNPINTVFDAKR	L					File4253 Spectrum237841 scans: 27139	126/130C	---	127c/130C	---	128c/130C	---	129c/130C	---	131/130C	---	127n/130C	---	128n/130C	---	129n/130C	---
1	2	Pavir.Ia03670.1.p|PACid:30213866	Pavir.Ia03670.1.p|PACid:30213866	3226	83084	188	188	23	23	37.8	5.13	482389	1	0	0	759.426	2275.25	3	2275.25	0.0034	1	38.72	15	34	0.00023	K	NQVAMNPINTVFDAKR	L					File4252 Spectrum195220 scans: 27115	126/130C	---	127c/130C	---	128c/130C	---	129c/130C	---	131/130C	---	127n/130C	---	128n/130C	---	129n/130C	---
1	2	Pavir.Ia03670.1.p|PACid:30213866	Pavir.Ia03670.1.p|PACid:30213866	3226	83084	188	188	23	23	37.8	5.13	482393	1	0	0	759.426	2275.26	3	2275.25	0.0037	1	27.86	17	34	0.0045	K	NQVAMNPINTVFDAKR	L					File4252 Spectrum195699 scans: 27649	126/130C	---	127c/130C	---	128c/130C	---	129c/130C	---	131/130C	---	127n/130C	---	128n/130C	---	129n/130C	---
1	2	Pavir.Ia03670.1.p|PACid:30213866	Pavir.Ia03670.1.p|PACid:30213866	3226	83084	188	188	23	23	37.8	5.13	486905	1	0	0	764.756	2291.25	3	2291.25	0.0009	1	30.29	21	34	0.0061	K	NQVAMNPINTVFDAKR	L	Oxidation (M)	0.0000300000000000.0			File4249 Spectrum60831 scans: 23351	126/130C	---	127c/130C	---	128c/130C	---	129c/130C	---	131/130C	---	127n/130C	---	128n/130C	---	129n/130C	---
1	2	Pavir.Ia03670.1.p|PACid:30213866	Pavir.Ia03670.1.p|PACid:30213866	3226	83084	188	188	23	23	37.8	5.13	486906	1	0	0	764.756	2291.25	3	2291.25	0.0011	1	30.63	16	34	0.0018	K	NQVAMNPINTVFDAKR	L	Oxidation (M)	0.0000300000000000.0			File4264 Spectrum689382 scans: 23897	126/130C	---	127c/130C	---	128c/130C	---	129c/130C	---	131/130C	---	127n/130C	---	128n/130C	---	129n/130C	---
1	2	Pavir.Ia03670.1.p|PACid:30213866	Pavir.Ia03670.1.p|PACid:30213866	3226	83084	188	188	23	23	37.8	5.13	486910	1	0	0	764.757	2291.25	3	2291.25	0.002	1	30.29	17	34	0.0028	K	NQVAMNPINTVFDAKR	L	Oxidation (M)	0.0000300000000000.0			File4252 Spectrum191966 scans: 23548	126/130C	---	127c/130C	---	128c/130C	---	129c/130C	---	131/130C	---	127n/130C	---	128n/130C	---	129n/130C	---
1	2	Pavir.Ia03670.1.p|PACid:30213866	Pavir.Ia03670.1.p|PACid:30213866	3226	83084	188	188	23	23	37.8	5.13	486912	1	0	0	573.819	2291.25	4	2291.25	0.0023	1	25	16	34	0.0063	K	NQVAMNPINTVFDAKR	L	Oxidation (M)	0.0000300000000000.0			File4249 Spectrum61212 scans: 23764	126/130C	---	127c/130C	---	128c/130C	---	129c/130C	---	131/130C	---	127n/130C	---	128n/130C	---	129n/130C	---
1	2	Pavir.Ia03670.1.p|PACid:30213866	Pavir.Ia03670.1.p|PACid:30213866	3226	83084	188	188	23	23	37.8	5.13	486914	1	0	0	764.757	2291.25	3	2291.25	0.0025	1	38.62	16	34	0.00032	K	NQVAMNPINTVFDAKR	L	Oxidation (M)	0.0000300000000000.0			File4249 Spectrum61087 scans: 23629	126/130C	---	127c/130C	---	128c/130C	---	129c/130C	---	131/130C	---	127n/130C	---	128n/130C	---	129n/130C	---
1	2	Pavir.Ia03670.1.p|PACid:30213866	Pavir.Ia03670.1.p|PACid:30213866	3226	83084	188	188	23	23	37.8	5.13	486916	1	0	0	764.757	2291.25	3	2291.25	0.0027	1	38.83	25	34	0.0025	K	NQVAMNPINTVFDAKR	L	Oxidation (M)	0.0000300000000000.0			File4252 Spectrum192207 scans: 23812	126/130C	---	127c/130C	---	128c/130C	---	129c/130C	---	131/130C	---	127n/130C	---	128n/130C	---	129n/130C	---
1	2	Pavir.Ia03670.1.p|PACid:30213866	Pavir.Ia03670.1.p|PACid:30213866	3226	83084	188	188	23	23	37.8	5.13	486917	1	0	0	573.819	2291.25	4	2291.25	0.0028	1	34.55	20	34	0.002	K	NQVAMNPINTVFDAKR	L	Oxidation (M)	0.0000300000000000.0			File4249 Spectrum60948 scans: 23478	126/130C	---	127c/130C	---	128c/130C	---	129c/130C	---	131/130C	---	127n/130C	---	128n/130C	---	129n/130C	---
1	2	Pavir.Ia03670.1.p|PACid:30213866	Pavir.Ia03670.1.p|PACid:30213866	3226	83084	188	188	23	23	37.8	5.13	487166	1	0	0	765.084	2292.23	3	2292.23	0.0009	1	31.94	22	34	0.0055	K	NQVAMNPINTVFDAKR	L	Deamidated (NQ); Oxidation (M)	0.1000300000000000.0			File4264 Spectrum691109 scans: 25770	126/130C	---	127c/130C	---	128c/130C	---	129c/130C	---	131/130C	---	127n/130C	---	128n/130C	---	129n/130C	---
1	2	Pavir.Ia03670.1.p|PACid:30213866	Pavir.Ia03670.1.p|PACid:30213866	3226	83084	188	188	23	23	37.8	5.13	487168	1	0	0	765.085	2292.23	3	2292.23	0.002	1	38.2	20	34	0.00087	K	NQVAMNPINTVFDAKR	L	Deamidated (NQ); Oxidation (M)	0.1000300000000000.0			File4260 Spectrum514554 scans: 25540	126/130C	---	127c/130C	---	128c/130C	---	129c/130C	---	131/130C	---	127n/130C	---	128n/130C	---	129n/130C	---
1	2	Pavir.Ia03670.1.p|PACid:30213866	Pavir.Ia03670.1.p|PACid:30213866	3226	83084	188	188	23	23	37.8	5.13	534108	1	0	0	825.832	2474.47	3	2474.47	0.0013	1	43.98		30	0.0023	R	IINEPTAAAIAYGLDKK	S					File4253 Spectrum245096 scans: 35218	126/130C	---	127c/130C	---	128c/130C	---	129c/130C	---	131/130C	---	127n/130C	---	128n/130C	---	129n/130C	---
1	2	Pavir.Ia03670.1.p|PACid:30213866	Pavir.Ia03670.1.p|PACid:30213866	3226	83084	188	188	23	23	37.8	5.13	534110	1	0	0	619.625	2474.47	4	2474.47	0.0014	1	25.86	18	30	0.0083	R	IINEPTAAAIAYGLDKK	S					File4253 Spectrum245292 scans: 35441	126/130C	---	127c/130C	---	128c/130C	---	129c/130C	---	131/130C	---	127n/130C	---	128n/130C	---	129n/130C	---
1	2	Pavir.Ia03670.1.p|PACid:30213866	Pavir.Ia03670.1.p|PACid:30213866	3226	83084	188	188	23	23	37.8	5.13	534117	1	0	0	619.626	2474.47	4	2474.47	0.0017	1	26.76	17	30	0.0054	R	IINEPTAAAIAYGLDKK	S					File4255 Spectrum329280 scans: 33112	126/130C	---	127c/130C	---	128c/130C	---	129c/130C	---	131/130C	---	127n/130C	---	128n/130C	---	129n/130C	---
1	2	Pavir.Ia03670.1.p|PACid:30213866	Pavir.Ia03670.1.p|PACid:30213866	3226	83084	188	188	23	23	37.8	5.13	534125	1	0	0	825.832	2474.47	3	2474.47	0.0021	1	38.2	30	30	0.0085	R	IINEPTAAAIAYGLDKK	S					File4253 Spectrum245541 scans: 35729	126/130C	---	127c/130C	---	128c/130C	---	129c/130C	---	131/130C	---	127n/130C	---	128n/130C	---	129n/130C	---
1	2	Pavir.Ia03670.1.p|PACid:30213866	Pavir.Ia03670.1.p|PACid:30213866	3226	83084	188	188	23	23	37.8	5.13	534129	1	0	0	619.626	2474.47	4	2474.47	0.0022	1	27.8	14	30	0.0025	R	IINEPTAAAIAYGLDKK	S					File4254 Spectrum288468 scans: 35663	126/130C	---	127c/130C	---	128c/130C	---	129c/130C	---	131/130C	---	127n/130C	---	128n/130C	---	129n/130C	---
1	2	Pavir.Ia03670.1.p|PACid:30213866	Pavir.Ia03670.1.p|PACid:30213866	3226	83084	188	188	23	23	37.8	5.13	534134	1	0	0	825.832	2474.47	3	2474.47	0.0023	1	55.72		30	0.00015	R	IINEPTAAAIAYGLDKK	S					File4253 Spectrum245319 scans: 35473	126/130C	---	127c/130C	---	128c/130C	---	129c/130C	---	131/130C	---	127n/130C	---	128n/130C	---	129n/130C	---
1	2	Pavir.Ia03670.1.p|PACid:30213866	Pavir.Ia03670.1.p|PACid:30213866	3226	83084	188	188	23	23	37.8	5.13	534135	1	0	0	825.832	2474.47	3	2474.47	0.0023	1	48.75		30	0.00076	R	IINEPTAAAIAYGLDKK	S					File4253 Spectrum244866 scans: 34957	126/130C	---	127c/130C	---	128c/130C	---	129c/130C	---	131/130C	---	127n/130C	---	128n/130C	---	129n/130C	---
1	2	Pavir.Ia03670.1.p|PACid:30213866	Pavir.Ia03670.1.p|PACid:30213866	3226	83084	188	188	23	23	37.8	5.13	534136	1	0	0	825.832	2474.47	3	2474.47	0.0023	1	47.69		30	0.00098	R	IINEPTAAAIAYGLDKK	S					File4254 Spectrum288171 scans: 35326	126/130C	---	127c/130C	---	128c/130C	---	129c/130C	---	131/130C	---	127n/130C	---	128n/130C	---	129n/130C	---
1	2	Pavir.Ia03670.1.p|PACid:30213866	Pavir.Ia03670.1.p|PACid:30213866	3226	83084	188	188	23	23	37.8	5.13	534143	1	0	0	825.832	2474.47	3	2474.47	0.0024	1	39.05	26	30	0.0027	R	IINEPTAAAIAYGLDKK	S					File4253 Spectrum244174 scans: 34172	126/130C	---	127c/130C	---	128c/130C	---	129c/130C	---	131/130C	---	127n/130C	---	128n/130C	---	129n/130C	---
1	2	Pavir.Ia03670.1.p|PACid:30213866	Pavir.Ia03670.1.p|PACid:30213866	3226	83084	188	188	23	23	37.8	5.13	534147	1	0	0	825.832	2474.47	3	2474.47	0.0026	1	37.02	23	30	0.0023	R	IINEPTAAAIAYGLDKK	S					File4254 Spectrum288415 scans: 35603	126/130C	---	127c/130C	---	128c/130C	---	129c/130C	---	131/130C	---	127n/130C	---	128n/130C	---	129n/130C	---
1	2	Pavir.Ia03670.1.p|PACid:30213866	Pavir.Ia03670.1.p|PACid:30213866	3226	83084	188	188	23	23	37.8	5.13	534148	1	0	0	825.832	2474.47	3	2474.47	0.0026	1	48.89		30	0.00074	R	IINEPTAAAIAYGLDKK	S					File4254 Spectrum287940 scans: 35065	126/130C	---	127c/130C	---	128c/130C	---	129c/130C	---	131/130C	---	127n/130C	---	128n/130C	---	129n/130C	---
1	2	Pavir.Ia03670.1.p|PACid:30213866	Pavir.Ia03670.1.p|PACid:30213866	3226	83084	188	188	23	23	37.8	5.13	534149	1	0	0	825.832	2474.47	3	2474.47	0.0026	1	43.76	25	30	0.00074	R	IINEPTAAAIAYGLDKK	S					File4254 Spectrum287241 scans: 34274	126/130C	---	127c/130C	---	128c/130C	---	129c/130C	---	131/130C	---	127n/130C	---	128n/130C	---	129n/130C	---
1	2	Pavir.Ia03670.1.p|PACid:30213866	Pavir.Ia03670.1.p|PACid:30213866	3226	83084	188	188	23	23	37.8	5.13	534155	1	0	0	619.626	2474.47	4	2474.47	0.0029	1	29.28	14	30	0.0018	R	IINEPTAAAIAYGLDKK	S					File4253 Spectrum246194 scans: 36483	126/130C	---	127c/130C	---	128c/130C	---	129c/130C	---	131/130C	---	127n/130C	---	128n/130C	---	129n/130C	---
1	2	Pavir.Ia03670.1.p|PACid:30213866	Pavir.Ia03670.1.p|PACid:30213866	3226	83084	188	188	23	23	37.8	5.13	534161	1	0	0	825.832	2474.47	3	2474.47	0.003	1	45.42		30	0.0016	R	IINEPTAAAIAYGLDKK	S					File4254 Spectrum288642 scans: 35862	126/130C	---	127c/130C	---	128c/130C	---	129c/130C	---	131/130C	---	127n/130C	---	128n/130C	---	129n/130C	---
1	2	Pavir.Ia03670.1.p|PACid:30213866	Pavir.Ia03670.1.p|PACid:30213866	3226	83084	188	188	23	23	37.8	5.13	534162	1	0	0	825.832	2474.47	3	2474.47	0.003	1	50.42	28	30	0.00033	R	IINEPTAAAIAYGLDKK	S					File4253 Spectrum244640 scans: 34701	126/130C	---	127c/130C	---	128c/130C	---	129c/130C	---	131/130C	---	127n/130C	---	128n/130C	---	129n/130C	---
1	2	Pavir.Ia03670.1.p|PACid:30213866	Pavir.Ia03670.1.p|PACid:30213866	3226	83084	188	188	23	23	37.8	5.13	534166	1	0	0	619.626	2474.47	4	2474.47	0.0032	1	25.78	14	30	0.0038	R	IINEPTAAAIAYGLDKK	S					File4254 Spectrum288242 scans: 35406	126/130C	---	127c/130C	---	128c/130C	---	129c/130C	---	131/130C	---	127n/130C	---	128n/130C	---	129n/130C	---
1	2	Pavir.Ia03670.1.p|PACid:30213866	Pavir.Ia03670.1.p|PACid:30213866	3226	83084	188	188	23	23	37.8	5.13	534167	1	0	0	619.626	2474.47	4	2474.47	0.0032	1	27.05	15	30	0.0032	R	IINEPTAAAIAYGLDKK	S					File4254 Spectrum288011 scans: 35144	126/130C	---	127c/130C	---	128c/130C	---	129c/130C	---	131/130C	---	127n/130C	---	128n/130C	---	129n/130C	---
1	2	Pavir.Ia03670.1.p|PACid:30213866	Pavir.Ia03670.1.p|PACid:30213866	3226	83084	188	188	23	23	37.8	5.13	534180	1	0	0	619.626	2474.48	4	2474.47	0.0036	1	24	14	30	0.0056	R	IINEPTAAAIAYGLDKK	S					File4254 Spectrum287304 scans: 34345	126/130C	---	127c/130C	---	128c/130C	---	129c/130C	---	131/130C	---	127n/130C	---	128n/130C	---	129n/130C	---
1	2	Pavir.Ia03670.1.p|PACid:30213866	Pavir.Ia03670.1.p|PACid:30213866	3226	83084	188	188	23	23	37.8	5.13	534183	1	0	0	825.832	2474.48	3	2474.47	0.0037	1	40.95	26	30	0.0019	R	IINEPTAAAIAYGLDKK	S					File4253 Spectrum244408 scans: 34438	126/130C	---	127c/130C	---	128c/130C	---	129c/130C	---	131/130C	---	127n/130C	---	128n/130C	---	129n/130C	---
1	2	Pavir.Ia03670.1.p|PACid:30213866	Pavir.Ia03670.1.p|PACid:30213866	3226	83084	188	188	23	23	37.8	5.13	534184	1	0	0	825.832	2474.48	3	2474.47	0.0037	1	49.25		30	0.00066	R	IINEPTAAAIAYGLDKK	S					File4254 Spectrum287713 scans: 34808	126/130C	---	127c/130C	---	128c/130C	---	129c/130C	---	131/130C	---	127n/130C	---	128n/130C	---	129n/130C	---
1	2	Pavir.Ia03670.1.p|PACid:30213866	Pavir.Ia03670.1.p|PACid:30213866	3226	83084	188	188	23	23	37.8	5.13	534185	1	0	0	825.832	2474.48	3	2474.47	0.0037	1	57.11	28	30	7.7e-05	R	IINEPTAAAIAYGLDKK	S					File4253 Spectrum243944 scans: 33911	126/130C	---	127c/130C	---	128c/130C	---	129c/130C	---	131/130C	---	127n/130C	---	128n/130C	---	129n/130C	---
1	2	Pavir.Ia03670.1.p|PACid:30213866	Pavir.Ia03670.1.p|PACid:30213866	3226	83084	188	188	23	23	37.8	5.13	534189	1	0	0	825.832	2474.48	3	2474.47	0.0039	1	48.21	28	30	0.00055	R	IINEPTAAAIAYGLDKK	S					File4254 Spectrum287474 scans: 34538	126/130C	---	127c/130C	---	128c/130C	---	129c/130C	---	131/130C	---	127n/130C	---	128n/130C	---	129n/130C	---
1	2	Pavir.Ia03670.1.p|PACid:30213866	Pavir.Ia03670.1.p|PACid:30213866	3226	83084	188	188	23	23	37.8	5.13	534197	1	0	0	825.833	2474.48	3	2474.47	0.0044	1	40.07	22	30	0.00085	R	IINEPTAAAIAYGLDKK	S					File4255 Spectrum329466 scans: 33316	126/130C	---	127c/130C	---	128c/130C	---	129c/130C	---	131/130C	---	127n/130C	---	128n/130C	---	129n/130C	---
1	2	Pavir.Ia03670.1.p|PACid:30213866	Pavir.Ia03670.1.p|PACid:30213866	3226	83084	188	188	23	23	37.8	5.13	534214	1	0	0	619.627	2474.48	4	2474.47	0.0056	1	25.51	14	30	0.004	R	IINEPTAAAIAYGLDKK	S					File4254 Spectrum287775 scans: 34878	126/130C	---	127c/130C	---	128c/130C	---	129c/130C	---	131/130C	---	127n/130C	---	128n/130C	---	129n/130C	---
1	2	Pavir.Ia03670.1.p|PACid:30213866	Pavir.Ia03670.1.p|PACid:30213866	3226	83084	188	188	23	23	37.8	5.13	534435	1	0	0	826.159	2475.46	3	2475.46	0.0001	1	43.38	28	31	0.0016	R	IINEPTAAAIAYGLDKK	S	Deamidated (NQ)	0.00100000000000000.0			File4250 Spectrum115108 scans: 34357	126/130C	---	127c/130C	---	128c/130C	---	129c/130C	---	131/130C	---	127n/130C	---	128n/130C	---	129n/130C	---
1	2	Pavir.Ia03670.1.p|PACid:30213866	Pavir.Ia03670.1.p|PACid:30213866	3226	83084	188	188	23	23	37.8	5.13	534436	1	0	0	619.871	2475.46	4	2475.46	0.0008	1	27.43	14	31	0.0027	R	IINEPTAAAIAYGLDKK	S	Deamidated (NQ)	0.00100000000000000.0			File4249 Spectrum71046 scans: 34495	126/130C	---	127c/130C	---	128c/130C	---	129c/130C	---	131/130C	---	127n/130C	---	128n/130C	---	129n/130C	---
1	2	Pavir.Ia03670.1.p|PACid:30213866	Pavir.Ia03670.1.p|PACid:30213866	3226	83084	188	188	23	23	37.8	5.13	534437	1	0	0	826.16	2475.46	3	2475.46	0.0013	1	46.13	30	31	0.0014	R	IINEPTAAAIAYGLDKK	S	Deamidated (NQ)	0.00100000000000000.0			File4250 Spectrum115354 scans: 34627	126/130C	---	127c/130C	---	128c/130C	---	129c/130C	---	131/130C	---	127n/130C	---	128n/130C	---	129n/130C	---
1	2	Pavir.Ia03670.1.p|PACid:30213866	Pavir.Ia03670.1.p|PACid:30213866	3226	83084	188	188	23	23	37.8	5.13	534439	1	0	0	826.16	2475.46	3	2475.46	0.0022	1	33.16	21	31	0.0033	R	IINEPTAAAIAYGLDKK	S	Deamidated (NQ)	0.00100000000000000.0			File4250 Spectrum115604 scans: 34903	126/130C	---	127c/130C	---	128c/130C	---	129c/130C	---	131/130C	---	127n/130C	---	128n/130C	---	129n/130C	---
1	2	Pavir.Ia03670.1.p|PACid:30213866	Pavir.Ia03670.1.p|PACid:30213866	3226	83084	188	188	23	23	37.8	5.13	534443	1	0	0	826.161	2475.46	3	2475.46	0.0044	1	38.23	16	31	0.0003	R	IINEPTAAAIAYGLDKK	S	Deamidated (NQ)	0.00100000000000000.0			File4249 Spectrum71133 scans: 34589	126/130C	---	127c/130C	---	128c/130C	---	129c/130C	---	131/130C	---	127n/130C	---	128n/130C	---	129n/130C	---
1	2	Pavir.Ia03670.1.p|PACid:30213866	Pavir.Ia03670.1.p|PACid:30213866	3226	83084	188	188	23	23	37.8	5.13	616749	1	0	0	963.149	2886.42	3	2886.42	0.0007	0	30.1	20	34	0.0052	K	EQVFSTYSDNQPGVLIQVYEGER	A					File4264 Spectrum699989 scans: 35457	126/130C	---	127c/130C	---	128c/130C	---	129c/130C	---	131/130C	---	127n/130C	---	128n/130C	---	129n/130C	---
1	2	Pavir.Ia03670.1.p|PACid:30213866	Pavir.Ia03670.1.p|PACid:30213866	3226	83084	188	188	23	23	37.8	5.13	616753	1	0	0	963.149	2886.42	3	2886.42	0.0009	0	38.63	20	34	0.00074	K	EQVFSTYSDNQPGVLIQVYEGER	A					File4250 Spectrum115754 scans: 35068	126/130C	---	127c/130C	---	128c/130C	---	129c/130C	---	131/130C	---	127n/130C	---	128n/130C	---	129n/130C	---
1	2	Pavir.Ia03670.1.p|PACid:30213866	Pavir.Ia03670.1.p|PACid:30213866	3226	83084	188	188	23	23	37.8	5.13	616764	1	0	0	963.149	2886.43	3	2886.42	0.0025	0	32.6	18	34	0.0021	K	EQVFSTYSDNQPGVLIQVYEGER	A					File4264 Spectrum699745 scans: 35190	126/130C	---	127c/130C	---	128c/130C	---	129c/130C	---	131/130C	---	127n/130C	---	128n/130C	---	129n/130C	---
1	2	Pavir.Ia03670.1.p|PACid:30213866	Pavir.Ia03670.1.p|PACid:30213866	3226	83084	188	188	23	23	37.8	5.13	616767	1	0	0	963.149	2886.43	3	2886.42	0.0028	0	54.68	20	34	2.1e-05	K	EQVFSTYSDNQPGVLIQVYEGER	A					File4249 Spectrum71134 scans: 34591	126/130C	---	127c/130C	---	128c/130C	---	129c/130C	---	131/130C	---	127n/130C	---	128n/130C	---	129n/130C	---
1	2	Pavir.Ia03670.1.p|PACid:30213866	Pavir.Ia03670.1.p|PACid:30213866	3226	83084	188	188	23	23	37.8	5.13	616768	1	0	0	963.149	2886.43	3	2886.42	0.0029	0	25.23	17	34	0.0094	K	EQVFSTYSDNQPGVLIQVYEGER	A					File4264 Spectrum700226 scans: 35717	126/130C	---	127c/130C	---	128c/130C	---	129c/130C	---	131/130C	---	127n/130C	---	128n/130C	---	129n/130C	---
1	2	Pavir.Ia03670.1.p|PACid:30213866	Pavir.Ia03670.1.p|PACid:30213866	3226	83084	188	188	23	23	37.8	5.13	616771	1	0	0	963.15	2886.43	3	2886.42	0.0031	0	44.13	20	34	0.00022	K	EQVFSTYSDNQPGVLIQVYEGER	A					File4264 Spectrum699510 scans: 34931	126/130C	---	127c/130C	---	128c/130C	---	129c/130C	---	131/130C	---	127n/130C	---	128n/130C	---	129n/130C	---
1	2	Pavir.Ia03670.1.p|PACid:30213866	Pavir.Ia03670.1.p|PACid:30213866	3226	83084	188	188	23	23	37.8	5.13	616773	1	0	0	722.614	2886.43	4	2886.42	0.0033	0	28.04	19	34	0.0064	K	EQVFSTYSDNQPGVLIQVYEGER	A					File4249 Spectrum71342 scans: 34819	126/130C	---	127c/130C	---	128c/130C	---	129c/130C	---	131/130C	---	127n/130C	---	128n/130C	---	129n/130C	---
1	2	Pavir.Ia03670.1.p|PACid:30213866	Pavir.Ia03670.1.p|PACid:30213866	3226	83084	188	188	23	23	37.8	5.13	616779	1	0	0	963.15	2886.43	3	2886.42	0.0044	0	34.38	16	34	0.00082	K	EQVFSTYSDNQPGVLIQVYEGER	A					File4249 Spectrum71375 scans: 34855	126/130C	---	127c/130C	---	128c/130C	---	129c/130C	---	131/130C	---	127n/130C	---	128n/130C	---	129n/130C	---
1	2	Pavir.Ia03670.1.p|PACid:30213866	Pavir.Ia03670.1.p|PACid:30213866	3226	83084	188	188	23	23	37.8	5.13	617052	1	0	0	963.478	2887.41	3	2887.41	0.0038	0	31.85	20	34	0.0036	K	EQVFSTYSDNQPGVLIQVYEGER	A	Deamidated (NQ)	0.00000000001000000000000.0			File4261 Spectrum569091 scans: 36844	126/130C	---	127c/130C	---	128c/130C	---	129c/130C	---	131/130C	---	127n/130C	---	128n/130C	---	129n/130C	---
1	2	Pavir.Ia03670.1.p|PACid:30213866	Pavir.Ia03670.1.p|PACid:30213866	3226	83084	188	188	23	23	37.8	5.13	638559	1	0	0	759.428	3033.68	4	3033.68	0.0031	1	26.58	18	33	0.0074	R	LIGDAAKNQVAMNPINTVFDAK	R	Deamidated (NQ); Oxidation (M)	0.0000000100030000000000.0			File4253 Spectrum244826 scans: 34912	126/130C	---	127c/130C	---	128c/130C	---	129c/130C	---	131/130C	---	127n/130C	---	128n/130C	---	129n/130C	---
1	2	Pavir.Ia03670.1.p|PACid:30213866	Pavir.Ia03670.1.p|PACid:30213866	3226	83084	188	188	23	23	37.8	5.13	639933	1	0	1	1016.21	3045.6	3	3045.6	0.0025	0	41.05	23	35	0.00098	K	SINPDEAVAYGAAVQAAILTGEGNEK	V					File4258 Spectrum442732 scans: 42177	126/130C	1.816	127c/130C	2.838	128c/130C	3.286	129c/130C	-0.514	131/130C	2.777	127n/130C	2.156	128n/130C	1.833	129n/130C	2.206
1	2	Pavir.Ia03670.1.p|PACid:30213866	Pavir.Ia03670.1.p|PACid:30213866	3226	83084	188	188	23	23	37.8	5.13	639935	1	0	1	762.409	3045.61	4	3045.6	0.0037	0	46.77	21	35	0.00015	K	SINPDEAVAYGAAVQAAILTGEGNEK	V					File4258 Spectrum442651 scans: 42084	126/130C	0.921	127c/130C	0.927	128c/130C	1.31	129c/130C	1.058	131/130C	0.9	127n/130C	1.194	128n/130C	1.029	129n/130C	1.361
1	2	Pavir.Ia03670.1.p|PACid:30213866	Pavir.Ia03670.1.p|PACid:30213866	3226	83084	188	188	23	23	37.8	5.13	639942	1	0	1	1016.21	3045.61	3	3045.6	0.0123	0	32.85	19	35	0.0022	K	SINPDEAVAYGAAVQAAILTGEGNEK	V					File4258 Spectrum442467 scans: 41874	126/130C	0.927	127c/130C	0.531	128c/130C	0.907	129c/130C	0.645	131/130C	0.686	127n/130C	1.075	128n/130C	1.079	129n/130C	0.393
1	2	Pavir.Ia03670.1.p|PACid:30213866	Pavir.Ia03670.1.p|PACid:30213866	3226	83084	188	188	23	23	37.8	5.13	661647	1	0	0	811.928	3243.68	4	3243.68	0.0006	1	45.04	21	35	0.00021	K	KEQVFSTYSDNQPGVLIQVYEGER	A					File4260 Spectrum520976 scans: 32564	126/130C	---	127c/130C	---	128c/130C	---	129c/130C	---	131/130C	---	127n/130C	---	128n/130C	---	129n/130C	---
1	2	Pavir.Ia03670.1.p|PACid:30213866	Pavir.Ia03670.1.p|PACid:30213866	3226	83084	188	188	23	23	37.8	5.13	661650	1	0	0	811.928	3243.68	4	3243.68	0.0023	1	41.33	19	35	0.00037	K	KEQVFSTYSDNQPGVLIQVYEGER	A					File4260 Spectrum520934 scans: 32518	126/130C	---	127c/130C	---	128c/130C	---	129c/130C	---	131/130C	---	127n/130C	---	128n/130C	---	129n/130C	---
1	2	Pavir.Ia03670.1.p|PACid:30213866	Pavir.Ia03670.1.p|PACid:30213866	3226	83084	188	188	23	23	37.8	5.13	661720	1	0	0	812.179	3244.69	4	3244.67	0.0205	1	34.35	20	35	0.0021	K	KEQVFSTYSDNQPGVLIQVYEGER	A	Deamidated (NQ)	0.000000000000000001000000.0			File4261 Spectrum565700 scans: 33100	126/130C	---	127c/130C	---	128c/130C	---	129c/130C	---	131/130C	---	127n/130C	---	128n/130C	---	129n/130C	---
1	3	Pavir.J02847.1.p|PACid:30218796	Pavir.J02847.1.p|PACid:30218796	2584	83527	144	144	19	19	30.4	5.17	109918	1	0	0	670.346	1338.68	2	1338.68	0.002	0	29.26	21	30	0.0079	K	CMEPVEK	C	Methylthio (C)	0.2000000.0			File4259 Spectrum465471 scans: 18921	126/130C	---	127c/130C	---	128c/130C	---	129c/130C	---	131/130C	---	127n/130C	---	128n/130C	---	129n/130C	---
1	3	Pavir.J02847.1.p|PACid:30218796	Pavir.J02847.1.p|PACid:30218796	2584	83527	144	144	19	19	30.4	5.17	158066	1	0	0	729.4	1456.79	2	1456.78	0.0013	0	55.5	22	31	2.5e-05	R	VEIIANDQGNR	T					File4249 Spectrum52623 scans: 14395	126/130C	---	127c/130C	---	128c/130C	---	129c/130C	---	131/130C	---	127n/130C	---	128n/130C	---	129n/130C	---
1	3	Pavir.J02847.1.p|PACid:30218796	Pavir.J02847.1.p|PACid:30218796	2584	83527	144	144	19	19	30.4	5.17	158365	1	0	0	729.892	1457.77	2	1457.77	0.0012	0	52.57	24	31	7.4e-05	R	VEIIANDQGNR	T	Deamidated (NQ)	0.00000100000.0			File4259 Spectrum462868 scans: 16055	126/130C	---	127c/130C	---	128c/130C	---	129c/130C	---	131/130C	---	127n/130C	---	128n/130C	---	129n/130C	---
1	3	Pavir.J02847.1.p|PACid:30218796	Pavir.J02847.1.p|PACid:30218796	2584	83527	144	144	19	19	30.4	5.17	158368	1	0	0	729.892	1457.77	2	1457.77	0.0017	0	35	24	31	0.0045	R	VEIIANDQGNR	T	Deamidated (NQ)	0.00000100000.0			File4261 Spectrum550017 scans: 16001	126/130C	---	127c/130C	---	128c/130C	---	129c/130C	---	131/130C	---	127n/130C	---	128n/130C	---	129n/130C	---
1	3	Pavir.J02847.1.p|PACid:30218796	Pavir.J02847.1.p|PACid:30218796	2584	83527	144	144	19	19	30.4	5.17	158370	1	0	0	729.892	1457.77	2	1457.77	0.0018	0	50.59	26	31	0.00019	R	VEIIANDQGNR	T	Deamidated (NQ)	0.00000000010.0			File4262 Spectrum593972 scans: 15390	126/130C	---	127c/130C	---	128c/130C	---	129c/130C	---	131/130C	---	127n/130C	---	128n/130C	---	129n/130C	---
1	3	Pavir.J02847.1.p|PACid:30218796	Pavir.J02847.1.p|PACid:30218796	2584	83527	144	144	19	19	30.4	5.17	159436	1	0	0	730.909	1459.8	2	1459.8	0.0021	0	47.94		32	0.0013	K	DAGVISGLNVMR	I					File4257 Spectrum383948 scans: 24988	126/130C	---	127c/130C	---	128c/130C	---	129c/130C	---	131/130C	---	127n/130C	---	128n/130C	---	129n/130C	---
1	3	Pavir.J02847.1.p|PACid:30218796	Pavir.J02847.1.p|PACid:30218796	2584	83527	144	144	19	19	30.4	5.17	159440	1	0	0	730.909	1459.8	2	1459.8	0.0026	0	41.88		32	0.0055	K	DAGVISGLNVMR	I					File4257 Spectrum384190 scans: 25253	126/130C	---	127c/130C	---	128c/130C	---	129c/130C	---	131/130C	---	127n/130C	---	128n/130C	---	129n/130C	---
1	3	Pavir.J02847.1.p|PACid:30218796	Pavir.J02847.1.p|PACid:30218796	2584	83527	144	144	19	19	30.4	5.17	166471	1	0	0	738.906	1475.8	2	1475.8	0.0008	0	52.3	28	32	0.0002	K	DAGVISGLNVMR	I	Oxidation (M)	0.000000000030.0			File4252 Spectrum188024 scans: 19253	126/130C	---	127c/130C	---	128c/130C	---	129c/130C	---	131/130C	---	127n/130C	---	128n/130C	---	129n/130C	---
1	3	Pavir.J02847.1.p|PACid:30218796	Pavir.J02847.1.p|PACid:30218796	2584	83527	144	144	19	19	30.4	5.17	166472	1	0	0	738.906	1475.8	2	1475.8	0.0008	0	58.11	22	32	1.4e-05	K	DAGVISGLNVMR	I	Oxidation (M)	0.000000000030.0			File4253 Spectrum230701 scans: 19305	126/130C	---	127c/130C	---	128c/130C	---	129c/130C	---	131/130C	---	127n/130C	---	128n/130C	---	129n/130C	---
1	3	Pavir.J02847.1.p|PACid:30218796	Pavir.J02847.1.p|PACid:30218796	2584	83527	144	144	19	19	30.4	5.17	166473	1	0	0	492.94	1475.8	3	1475.8	0.0008	0	43.06	27	32	0.0013	K	DAGVISGLNVMR	I	Oxidation (M)	0.000000000030.0			File4252 Spectrum188046 scans: 19277	126/130C	---	127c/130C	---	128c/130C	---	129c/130C	---	131/130C	---	127n/130C	---	128n/130C	---	129n/130C	---
1	3	Pavir.J02847.1.p|PACid:30218796	Pavir.J02847.1.p|PACid:30218796	2584	83527	144	144	19	19	30.4	5.17	166474	1	0	0	492.94	1475.8	3	1475.8	0.0008	0	49.54	30	32	0.00061	K	DAGVISGLNVMR	I	Oxidation (M)	0.000000000030.0			File4253 Spectrum230436 scans: 19017	126/130C	---	127c/130C	---	128c/130C	---	129c/130C	---	131/130C	---	127n/130C	---	128n/130C	---	129n/130C	---
1	3	Pavir.J02847.1.p|PACid:30218796	Pavir.J02847.1.p|PACid:30218796	2584	83527	144	144	19	19	30.4	5.17	166486	1	0	0	738.906	1475.8	2	1475.8	0.0013	0	47.05	27	32	0.00059	K	DAGVISGLNVMR	I	Oxidation (M)	0.000000000030.0			File4253 Spectrum230454 scans: 19037	126/130C	---	127c/130C	---	128c/130C	---	129c/130C	---	131/130C	---	127n/130C	---	128n/130C	---	129n/130C	---
1	3	Pavir.J02847.1.p|PACid:30218796	Pavir.J02847.1.p|PACid:30218796	2584	83527	144	144	19	19	30.4	5.17	166487	1	0	0	492.94	1475.8	3	1475.8	0.0014	0	37.27	25	32	0.0037	K	DAGVISGLNVMR	I	Oxidation (M)	0.000000000030.0			File4257 Spectrum379273 scans: 19867	126/130C	---	127c/130C	---	128c/130C	---	129c/130C	---	131/130C	---	127n/130C	---	128n/130C	---	129n/130C	---
1	3	Pavir.J02847.1.p|PACid:30218796	Pavir.J02847.1.p|PACid:30218796	2584	83527	144	144	19	19	30.4	5.17	166490	1	0	0	738.907	1475.8	2	1475.8	0.0015	0	51.13	21	32	6e-05	K	DAGVISGLNVMR	I	Oxidation (M)	0.000000000030.0			File4257 Spectrum379264 scans: 19857	126/130C	---	127c/130C	---	128c/130C	---	129c/130C	---	131/130C	---	127n/130C	---	128n/130C	---	129n/130C	---
1	3	Pavir.J02847.1.p|PACid:30218796	Pavir.J02847.1.p|PACid:30218796	2584	83527	144	144	19	19	30.4	5.17	166492	1	0	0	492.94	1475.8	3	1475.8	0.0023	0	33.78	25	32	0.0081	K	DAGVISGLNVMR	I	Oxidation (M)	0.000000000030.0			File4257 Spectrum379032 scans: 19603	126/130C	---	127c/130C	---	128c/130C	---	129c/130C	---	131/130C	---	127n/130C	---	128n/130C	---	129n/130C	---
1	3	Pavir.J02847.1.p|PACid:30218796	Pavir.J02847.1.p|PACid:30218796	2584	83527	144	144	19	19	30.4	5.17	166494	1	0	0	738.907	1475.8	2	1475.8	0.0025	0	55.99	21	32	1.9e-05	K	DAGVISGLNVMR	I	Oxidation (M)	0.000000000030.0			File4258 Spectrum422318 scans: 19605	126/130C	---	127c/130C	---	128c/130C	---	129c/130C	---	131/130C	---	127n/130C	---	128n/130C	---	129n/130C	---
1	3	Pavir.J02847.1.p|PACid:30218796	Pavir.J02847.1.p|PACid:30218796	2584	83527	144	144	19	19	30.4	5.17	166496	1	0	0	738.907	1475.8	2	1475.8	0.0026	0	36.54	23	32	0.0026	K	DAGVISGLNVMR	I	Oxidation (M)	0.000000000030.0			File4257 Spectrum379022 scans: 19592	126/130C	---	127c/130C	---	128c/130C	---	129c/130C	---	131/130C	---	127n/130C	---	128n/130C	---	129n/130C	---
1	3	Pavir.J02847.1.p|PACid:30218796	Pavir.J02847.1.p|PACid:30218796	2584	83527	144	144	19	19	30.4	5.17	166499	1	0	0	738.907	1475.8	2	1475.8	0.0032	0	39.11	16	32	0.00025	K	DAGVISGLNVMR	I	Oxidation (M)	0.000000000030.0			File4258 Spectrum422576 scans: 19884	126/130C	---	127c/130C	---	128c/130C	---	129c/130C	---	131/130C	---	127n/130C	---	128n/130C	---	129n/130C	---
1	3	Pavir.J02847.1.p|PACid:30218796	Pavir.J02847.1.p|PACid:30218796	2584	83527	144	144	19	19	30.4	5.17	166503	1	0	0	738.908	1475.8	2	1475.8	0.0036	0	47.33	20	32	0.00011	K	DAGVISGLNVMR	I	Oxidation (M)	0.000000000030.0			File4252 Spectrum187775 scans: 18981	126/130C	---	127c/130C	---	128c/130C	---	129c/130C	---	131/130C	---	127n/130C	---	128n/130C	---	129n/130C	---
1	3	Pavir.J02847.1.p|PACid:30218796	Pavir.J02847.1.p|PACid:30218796	2584	83527	144	144	19	19	30.4	5.17	201422	1	0	0	779.893	1557.77	2	1557.77	0.0005	0	40.43	23	30	0.0011	R	FEELNMDLFR	K	Oxidation (M)	0.0000030000.0			File4253 Spectrum242175 scans: 31934	126/130C	---	127c/130C	---	128c/130C	---	129c/130C	---	131/130C	---	127n/130C	---	128n/130C	---	129n/130C	---
1	3	Pavir.J02847.1.p|PACid:30218796	Pavir.J02847.1.p|PACid:30218796	2584	83527	144	144	19	19	30.4	5.17	201428	1	0	0	779.893	1557.77	2	1557.77	0.0019	0	49.94	24	30	0.00015	R	FEELNMDLFR	K	Oxidation (M)	0.0000030000.0			File4259 Spectrum477616 scans: 32444	126/130C	---	127c/130C	---	128c/130C	---	129c/130C	---	131/130C	---	127n/130C	---	128n/130C	---	129n/130C	---
1	3	Pavir.J02847.1.p|PACid:30218796	Pavir.J02847.1.p|PACid:30218796	2584	83527	144	144	19	19	30.4	5.17	213611	1	0	0	794.394	1586.77	2	1586.77	0.0013	0	46.47	23	29	0.00023	K	NALENYAYNMR	N					File4251 Spectrum148231 scans: 22535	126/130C	---	127c/130C	---	128c/130C	---	129c/130C	---	131/130C	---	127n/130C	---	128n/130C	---	129n/130C	---
1	3	Pavir.J02847.1.p|PACid:30218796	Pavir.J02847.1.p|PACid:30218796	2584	83527	144	144	19	19	30.4	5.17	213612	1	0	0	529.932	1586.77	3	1586.77	0.0019	0	30.91	17	29	0.0023	K	NALENYAYNMR	N					File4251 Spectrum148311 scans: 22622	126/130C	---	127c/130C	---	128c/130C	---	129c/130C	---	131/130C	---	127n/130C	---	128n/130C	---	129n/130C	---
1	3	Pavir.J02847.1.p|PACid:30218796	Pavir.J02847.1.p|PACid:30218796	2584	83527	144	144	19	19	30.4	5.17	213613	1	0	0	794.394	1586.77	2	1586.77	0.003	0	32.14	18	29	0.0019	K	NALENYAYNMR	N					File4252 Spectrum190835 scans: 22316	126/130C	---	127c/130C	---	128c/130C	---	129c/130C	---	131/130C	---	127n/130C	---	128n/130C	---	129n/130C	---
1	3	Pavir.J02847.1.p|PACid:30218796	Pavir.J02847.1.p|PACid:30218796	2584	83527	144	144	19	19	30.4	5.17	215203	1	0	0	795.514	1589.01	2	1589.01	0.0015	1	21.86	14	28	0.0089	R	NTTIPTKK	E					File4254 Spectrum265144 scans: 9995	126/130C	---	127c/130C	---	128c/130C	---	129c/130C	---	131/130C	---	127n/130C	---	128n/130C	---	129n/130C	---
1	3	Pavir.J02847.1.p|PACid:30218796	Pavir.J02847.1.p|PACid:30218796	2584	83527	144	144	19	19	30.4	5.17	215225	1	0	0	795.514	1589.01	2	1589.01	0.0016	1	24.66	14	28	0.0049	R	NTTIPTKK	E					File4254 Spectrum265392 scans: 10269	126/130C	---	127c/130C	---	128c/130C	---	129c/130C	---	131/130C	---	127n/130C	---	128n/130C	---	129n/130C	---
1	3	Pavir.J02847.1.p|PACid:30218796	Pavir.J02847.1.p|PACid:30218796	2584	83527	144	144	19	19	30.4	5.17	215235	1	0	0	795.514	1589.01	2	1589.01	0.0017	1	24.75	14	28	0.0048	R	NTTIPTKK	E					File4253 Spectrum222379 scans: 10139	126/130C	---	127c/130C	---	128c/130C	---	129c/130C	---	131/130C	---	127n/130C	---	128n/130C	---	129n/130C	---
1	3	Pavir.J02847.1.p|PACid:30218796	Pavir.J02847.1.p|PACid:30218796	2584	83527	144	144	19	19	30.4	5.17	215711	1	0	0	796.014	1590.01	2	1590	0.0184	1	23.25	15	30	0.0075	R	NTTIPTKK	E	Deamidated (NQ)	0.10000000.0			File4254 Spectrum265638 scans: 10541	126/130C	---	127c/130C	---	128c/130C	---	129c/130C	---	131/130C	---	127n/130C	---	128n/130C	---	129n/130C	---
1	3	Pavir.J02847.1.p|PACid:30218796	Pavir.J02847.1.p|PACid:30218796	2584	83527	144	144	19	19	30.4	5.17	221281	1	0	0	802.39	1602.77	2	1602.77	0.0002	0	28.81	16	28	0.003	K	NALENYAYNMR	N	Oxidation (M)	0.00000000030.0			File4263 Spectrum639543 scans: 17077	126/130C	---	127c/130C	---	128c/130C	---	129c/130C	---	131/130C	---	127n/130C	---	128n/130C	---	129n/130C	---
1	3	Pavir.J02847.1.p|PACid:30218796	Pavir.J02847.1.p|PACid:30218796	2584	83527	144	144	19	19	30.4	5.17	221284	1	0	0	802.391	1602.77	2	1602.77	0.0007	0	48.97	19	28	5.9e-05	K	NALENYAYNMR	N	Oxidation (M)	0.00000000030.0			File4251 Spectrum143414 scans: 17293	126/130C	---	127c/130C	---	128c/130C	---	129c/130C	---	131/130C	---	127n/130C	---	128n/130C	---	129n/130C	---
1	3	Pavir.J02847.1.p|PACid:30218796	Pavir.J02847.1.p|PACid:30218796	2584	83527	144	144	19	19	30.4	5.17	245051	1	0	1	552.648	1654.92	3	1654.92	0.002	0	42.47	24	32	0.00075	K	STVHDVVLVGGSTR	I					File4252 Spectrum182508 scans: 13185	126/130C	663.989	127c/130C	543.278	128c/130C	279.342	129c/130C	174.838	131/130C	-0.056	127n/130C	714.8	128n/130C	177.983	129n/130C	-22.026
1	3	Pavir.J02847.1.p|PACid:30218796	Pavir.J02847.1.p|PACid:30218796	2584	83527	144	144	19	19	30.4	5.17	245058	1	0	1	828.469	1654.92	2	1654.92	0.0026	0	56		32	0.00022	K	STVHDVVLVGGSTR	I					File4252 Spectrum182464 scans: 13136	126/130C	1.051	127c/130C	1.256	128c/130C	1.188	129c/130C	1.723	131/130C	0.872	127n/130C	1.059	128n/130C	0.733	129n/130C	1.411
1	3	Pavir.J02847.1.p|PACid:30218796	Pavir.J02847.1.p|PACid:30218796	2584	83527	144	144	19	19	30.4	5.17	275192	1	0	0	858.937	1715.86	2	1715.86	0.0016	0	48.92	19	31	5.7e-05	R	TTPSYVAFTDTER	L					File4263 Spectrum642482 scans: 20274	126/130C	---	127c/130C	---	128c/130C	---	129c/130C	---	131/130C	---	127n/130C	---	128n/130C	---	129n/130C	---
1	3	Pavir.J02847.1.p|PACid:30218796	Pavir.J02847.1.p|PACid:30218796	2584	83527	144	144	19	19	30.4	5.17	275193	1	0	0	572.96	1715.86	3	1715.86	0.0017	0	21.93	14	31	0.0088	R	TTPSYVAFTDTER	L					File4263 Spectrum642552 scans: 20350	126/130C	---	127c/130C	---	128c/130C	---	129c/130C	---	131/130C	---	127n/130C	---	128n/130C	---	129n/130C	---
1	3	Pavir.J02847.1.p|PACid:30218796	Pavir.J02847.1.p|PACid:30218796	2584	83527	144	144	19	19	30.4	5.17	275194	1	0	0	858.937	1715.86	2	1715.86	0.0017	0	32.86	18	31	0.002	R	TTPSYVAFTDTER	L					File4262 Spectrum598567 scans: 20402	126/130C	---	127c/130C	---	128c/130C	---	129c/130C	---	131/130C	---	127n/130C	---	128n/130C	---	129n/130C	---
1	3	Pavir.J02847.1.p|PACid:30218796	Pavir.J02847.1.p|PACid:30218796	2584	83527	144	144	19	19	30.4	5.17	284443	1	0	1	868.982	1735.95	2	1735.95	0.0004	0	55.19	24	33	4.4e-05	R	MVNHFVQEFK	R					File4253 Spectrum239734 scans: 29226	126/130C	1.202	127c/130C	1.374	128c/130C	1.184	129c/130C	1.603	131/130C	1.552	127n/130C	1.276	128n/130C	0.999	129n/130C	1.428
1	3	Pavir.J02847.1.p|PACid:30218796	Pavir.J02847.1.p|PACid:30218796	2584	83527	144	144	19	19	30.4	5.17	284451	1	0	1	868.982	1735.95	2	1735.95	0.0008	0	36.1	15	33	0.00045	R	MVNHFVQEFK	R					File4253 Spectrum241634 scans: 31332	126/130C	1.27	127c/130C	1.158	128c/130C	1.063	129c/130C	1.334	131/130C	1.419	127n/130C	1.255	128n/130C	1.093	129n/130C	1.344
1	3	Pavir.J02847.1.p|PACid:30218796	Pavir.J02847.1.p|PACid:30218796	2584	83527	144	144	19	19	30.4	5.17	284477	1	0	1	868.982	1735.95	2	1735.95	0.0013	0	55.75	24	33	4.1e-05	R	MVNHFVQEFK	R					File4253 Spectrum240930 scans: 30553	126/130C	1.199	127c/130C	1.261	128c/130C	1.143	129c/130C	1.538	131/130C	1.541	127n/130C	1.489	128n/130C	0.869	129n/130C	1.268
1	3	Pavir.J02847.1.p|PACid:30218796	Pavir.J02847.1.p|PACid:30218796	2584	83527	144	144	19	19	30.4	5.17	284489	1	0	1	868.982	1735.95	2	1735.95	0.0014	0	52.67	23	33	5.8e-05	R	MVNHFVQEFK	R					File4253 Spectrum240227 scans: 29768	126/130C	1.089	127c/130C	1.297	128c/130C	1.133	129c/130C	1.463	131/130C	1.439	127n/130C	1.343	128n/130C	0.967	129n/130C	1.437
1	3	Pavir.J02847.1.p|PACid:30218796	Pavir.J02847.1.p|PACid:30218796	2584	83527	144	144	19	19	30.4	5.17	284499	1	0	1	868.982	1735.95	2	1735.95	0.0015	0	53.67	24	33	5.6e-05	R	MVNHFVQEFK	R					File4253 Spectrum241164 scans: 30813	126/130C	1.022	127c/130C	1.367	128c/130C	1.091	129c/130C	1.437	131/130C	1.532	127n/130C	1.373	128n/130C	0.907	129n/130C	1.236
1	3	Pavir.J02847.1.p|PACid:30218796	Pavir.J02847.1.p|PACid:30218796	2584	83527	144	144	19	19	30.4	5.17	284500	1	0	1	868.982	1735.95	2	1735.95	0.0015	0	52.24	22	33	4.8e-05	R	MVNHFVQEFK	R					File4253 Spectrum240699 scans: 30294	126/130C	1.177	127c/130C	1.279	128c/130C	1.047	129c/130C	1.487	131/130C	1.506	127n/130C	1.447	128n/130C	0.987	129n/130C	1.48
1	3	Pavir.J02847.1.p|PACid:30218796	Pavir.J02847.1.p|PACid:30218796	2584	83527	144	144	19	19	30.4	5.17	284515	1	0	1	868.982	1735.95	2	1735.95	0.0019	0	50.9	23	33	8.5e-05	R	MVNHFVQEFK	R					File4253 Spectrum240459 scans: 30028	126/130C	1.289	127c/130C	1.416	128c/130C	1.253	129c/130C	1.486	131/130C	1.633	127n/130C	1.462	128n/130C	1.046	129n/130C	1.304
1	3	Pavir.J02847.1.p|PACid:30218796	Pavir.J02847.1.p|PACid:30218796	2584	83527	144	144	19	19	30.4	5.17	284525	1	0	1	868.983	1735.95	2	1735.95	0.0021	0	50.37	23	33	9.6e-05	R	MVNHFVQEFK	R					File4253 Spectrum241396 scans: 31070	126/130C	1.28	127c/130C	1.611	128c/130C	1.153	129c/130C	1.713	131/130C	1.723	127n/130C	1.546	128n/130C	1.238	129n/130C	1.484
1	3	Pavir.J02847.1.p|PACid:30218796	Pavir.J02847.1.p|PACid:30218796	2584	83527	144	144	19	19	30.4	5.17	284527	1	0	1	868.983	1735.95	2	1735.95	0.0021	0	47.12	21	33	0.00015	R	MVNHFVQEFK	R					File4253 Spectrum239982 scans: 29498	126/130C	1.034	127c/130C	1.225	128c/130C	0.927	129c/130C	1.32	131/130C	1.44	127n/130C	1.445	128n/130C	1.075	129n/130C	1.195
1	3	Pavir.J02847.1.p|PACid:30218796	Pavir.J02847.1.p|PACid:30218796	2584	83527	144	144	19	19	30.4	5.17	292156	1	0	1	876.979	1751.94	2	1751.94	0.0008	0	31.5	18	33	0.0023	R	MVNHFVQEFK	R	Oxidation (M)	0.3000000000.0			File4261 Spectrum555998 scans: 22499	126/130C	1.157	127c/130C	1.261	128c/130C	1.094	129c/130C	1.564	131/130C	1.287	127n/130C	1.538	128n/130C	0.971	129n/130C	1.234
1	3	Pavir.J02847.1.p|PACid:30218796	Pavir.J02847.1.p|PACid:30218796	2584	83527	144	144	19	19	30.4	5.17	292183	1	0	1	876.98	1751.94	2	1751.94	0.0012	0	37.17	15	33	0.00033	R	MVNHFVQEFK	R	Oxidation (M)	0.3000000000.0			File4253 Spectrum232556 scans: 21327	126/130C	1.256	127c/130C	1.552	128c/130C	1.296	129c/130C	1.758	131/130C	1.702	127n/130C	1.679	128n/130C	0.981	129n/130C	1.616
1	3	Pavir.J02847.1.p|PACid:30218796	Pavir.J02847.1.p|PACid:30218796	2584	83527	144	144	19	19	30.4	5.17	292185	1	0	1	876.98	1751.94	2	1751.94	0.0013	0	37.33	15	33	0.00035	R	MVNHFVQEFK	R	Oxidation (M)	0.3000000000.0			File4261 Spectrum556251 scans: 22774	126/130C	0.991	127c/130C	1.225	128c/130C	0.964	129c/130C	1.676	131/130C	1.264	127n/130C	1.402	128n/130C	0.808	129n/130C	1.157
1	3	Pavir.J02847.1.p|PACid:30218796	Pavir.J02847.1.p|PACid:30218796	2584	83527	144	144	19	19	30.4	5.17	292193	1	0	1	876.98	1751.94	2	1751.94	0.0015	0	40.99	15	33	0.00014	R	MVNHFVQEFK	R	Oxidation (M)	0.3000000000.0			File4253 Spectrum232309 scans: 21058	126/130C	1.029	127c/130C	1.281	128c/130C	1.221	129c/130C	1.316	131/130C	1.368	127n/130C	1.423	128n/130C	0.897	129n/130C	1.315
1	3	Pavir.J02847.1.p|PACid:30218796	Pavir.J02847.1.p|PACid:30218796	2584	83527	144	144	19	19	30.4	5.17	292194	1	0	1	876.98	1751.94	2	1751.94	0.0015	0	36.9	22	33	0.0018	R	MVNHFVQEFK	R	Oxidation (M)	0.3000000000.0			File4261 Spectrum556533 scans: 23085	126/130C	1.237	127c/130C	1.024	128c/130C	1.067	129c/130C	1.476	131/130C	1.469	127n/130C	1.523	128n/130C	0.955	129n/130C	1.133
1	3	Pavir.J02847.1.p|PACid:30218796	Pavir.J02847.1.p|PACid:30218796	2584	83527	144	144	19	19	30.4	5.17	292247	1	0	1	876.98	1751.95	2	1751.94	0.0028	0	26.13	16	33	0.006	R	MVNHFVQEFK	R	Oxidation (M)	0.3000000000.0			File4252 Spectrum190421 scans: 21866	126/130C	0.998	127c/130C	0.979	128c/130C	1.17	129c/130C	1.211	131/130C	1.2	127n/130C	1.328	128n/130C	1.264	129n/130C	1.232
1	3	Pavir.J02847.1.p|PACid:30218796	Pavir.J02847.1.p|PACid:30218796	2584	83527	144	144	19	19	30.4	5.17	292276	1	0	1	876.981	1751.95	2	1751.94	0.0043	0	29.37	14	33	0.0018	R	MVNHFVQEFK	R	Oxidation (M)	0.3000000000.0			File4253 Spectrum232054 scans: 20780	126/130C	1.25	127c/130C	1.373	128c/130C	1.141	129c/130C	1.875	131/130C	1.412	127n/130C	1.383	128n/130C	0.932	129n/130C	1.124
1	3	Pavir.J02847.1.p|PACid:30218796	Pavir.J02847.1.p|PACid:30218796	2584	83527	144	144	19	19	30.4	5.17	292382	1	0	0	877.012	1752.01	2	1752.01	0.0018	0	34.97	17	32	0.001	K	EIAEAYLGSTIK	N					File4260 Spectrum517134 scans: 28354	126/130C	---	127c/130C	---	128c/130C	---	129c/130C	---	131/130C	---	127n/130C	---	128n/130C	---	129n/130C	---
1	3	Pavir.J02847.1.p|PACid:30218796	Pavir.J02847.1.p|PACid:30218796	2584	83527	144	144	19	19	30.4	5.17	292384	1	0	0	585.01	1752.01	3	1752.01	0.002	0	27.66	16	32	0.0039	K	EIAEAYLGSTIK	N					File4260 Spectrum517133 scans: 28353	126/130C	---	127c/130C	---	128c/130C	---	129c/130C	---	131/130C	---	127n/130C	---	128n/130C	---	129n/130C	---
1	3	Pavir.J02847.1.p|PACid:30218796	Pavir.J02847.1.p|PACid:30218796	2584	83527	144	144	19	19	30.4	5.17	292385	1	0	0	585.01	1752.01	3	1752.01	0.002	0	25.76	17	32	0.0068	K	EIAEAYLGSTIK	N					File4260 Spectrum517383 scans: 28625	126/130C	---	127c/130C	---	128c/130C	---	129c/130C	---	131/130C	---	127n/130C	---	128n/130C	---	129n/130C	---
1	3	Pavir.J02847.1.p|PACid:30218796	Pavir.J02847.1.p|PACid:30218796	2584	83527	144	144	19	19	30.4	5.17	292676	1	0	1	877.472	1752.93	2	1752.93	0.0012	0	28.64	14	32	0.0021	R	MVNHFVQEFK	R	Deamidated (NQ); Oxidation (M)	0.3010000000.0			File4259 Spectrum468887 scans: 22674	126/130C	0.855	127c/130C	0.943	128c/130C	0.905	129c/130C	1.076	131/130C	1.124	127n/130C	1.038	128n/130C	0.751	129n/130C	0.972
1	3	Pavir.J02847.1.p|PACid:30218796	Pavir.J02847.1.p|PACid:30218796	2584	83527	144	144	19	19	30.4	5.17	292681	1	0	1	877.472	1752.93	2	1752.93	0.0019	0	23.47	14	33	0.0063	R	MVNHFVQEFK	R	Deamidated (NQ); Oxidation (M)	0.3000001000.0			File4263 Spectrum645307 scans: 23345	126/130C	1.2	127c/130C	1.624	128c/130C	0.958	129c/130C	1.488	131/130C	1.3	127n/130C	1.134	128n/130C	0.838	129n/130C	1.281
1	3	Pavir.J02847.1.p|PACid:30218796	Pavir.J02847.1.p|PACid:30218796	2584	83527	144	144	19	19	30.4	5.17	292684	1	0	1	877.472	1752.93	2	1752.93	0.0022	0	33.67	16	32	0.00087	R	MVNHFVQEFK	R	Deamidated (NQ); Oxidation (M)	0.3010000000.0			File4254 Spectrum275764 scans: 21628	126/130C	0.74	127c/130C	0.905	128c/130C	0.785	129c/130C	1.113	131/130C	1.195	127n/130C	1.018	128n/130C	0.737	129n/130C	0.971
1	3	Pavir.J02847.1.p|PACid:30218796	Pavir.J02847.1.p|PACid:30218796	2584	83527	144	144	19	19	30.4	5.17	292685	1	0	1	877.472	1752.93	2	1752.93	0.0024	0	35.49	16	32	0.00059	R	MVNHFVQEFK	R	Deamidated (NQ); Oxidation (M)	0.3010000000.0			File4262 Spectrum601442 scans: 23525	126/130C	1.306	127c/130C	1.297	128c/130C	1.022	129c/130C	1.552	131/130C	1.475	127n/130C	1.611	128n/130C	0.786	129n/130C	1.746
1	3	Pavir.J02847.1.p|PACid:30218796	Pavir.J02847.1.p|PACid:30218796	2584	83527	144	144	19	19	30.4	5.17	305958	1	0	0	595.976	1784.91	3	1784.91	-0.0016	1	28.88	14	32	0.002	R	ARFEELNMDLFR	K	Oxidation (M)	0.000000030000.0			File4259 Spectrum474220 scans: 28561	126/130C	---	127c/130C	---	128c/130C	---	129c/130C	---	131/130C	---	127n/130C	---	128n/130C	---	129n/130C	---
1	3	Pavir.J02847.1.p|PACid:30218796	Pavir.J02847.1.p|PACid:30218796	2584	83527	144	144	19	19	30.4	5.17	305964	1	0	0	595.977	1784.91	3	1784.91	0.0009	1	25.96	15	32	0.0046	R	ARFEELNMDLFR	K	Oxidation (M)	0.000000030000.0			File4260 Spectrum515746 scans: 26839	126/130C	---	127c/130C	---	128c/130C	---	129c/130C	---	131/130C	---	127n/130C	---	128n/130C	---	129n/130C	---
1	3	Pavir.J02847.1.p|PACid:30218796	Pavir.J02847.1.p|PACid:30218796	2584	83527	144	144	19	19	30.4	5.17	305965	1	0	0	595.977	1784.91	3	1784.91	0.0013	1	36.89	18	32	0.00069	R	ARFEELNMDLFR	K	Oxidation (M)	0.000000030000.0			File4258 Spectrum429573 scans: 27518	126/130C	---	127c/130C	---	128c/130C	---	129c/130C	---	131/130C	---	127n/130C	---	128n/130C	---	129n/130C	---
1	3	Pavir.J02847.1.p|PACid:30218796	Pavir.J02847.1.p|PACid:30218796	2584	83527	144	144	19	19	30.4	5.17	305971	1	0	0	595.977	1784.91	3	1784.91	0.0018	1	27.89	20	32	0.0085	R	ARFEELNMDLFR	K	Oxidation (M)	0.000000030000.0			File4259 Spectrum474681 scans: 29077	126/130C	---	127c/130C	---	128c/130C	---	129c/130C	---	131/130C	---	127n/130C	---	128n/130C	---	129n/130C	---
1	3	Pavir.J02847.1.p|PACid:30218796	Pavir.J02847.1.p|PACid:30218796	2584	83527	144	144	19	19	30.4	5.17	305973	1	0	0	595.977	1784.91	3	1784.91	0.002	1	25.18	17	32	0.008	R	ARFEELNMDLFR	K	Oxidation (M)	0.000000030000.0			File4253 Spectrum236936 scans: 26143	126/130C	---	127c/130C	---	128c/130C	---	129c/130C	---	131/130C	---	127n/130C	---	128n/130C	---	129n/130C	---
1	3	Pavir.J02847.1.p|PACid:30218796	Pavir.J02847.1.p|PACid:30218796	2584	83527	144	144	19	19	30.4	5.17	305974	1	0	0	595.977	1784.91	3	1784.91	0.0022	1	34.7	20	32	0.0018	R	ARFEELNMDLFR	K	Oxidation (M)	0.000000030000.0			File4259 Spectrum474454 scans: 28823	126/130C	---	127c/130C	---	128c/130C	---	129c/130C	---	131/130C	---	127n/130C	---	128n/130C	---	129n/130C	---
1	3	Pavir.J02847.1.p|PACid:30218796	Pavir.J02847.1.p|PACid:30218796	2584	83527	144	144	19	19	30.4	5.17	305976	1	0	0	595.978	1784.91	3	1784.91	0.0029	1	33.84	22	32	0.0036	R	ARFEELNMDLFR	K	Oxidation (M)	0.000000030000.0			File4253 Spectrum236694 scans: 25877	126/130C	---	127c/130C	---	128c/130C	---	129c/130C	---	131/130C	---	127n/130C	---	128n/130C	---	129n/130C	---
1	3	Pavir.J02847.1.p|PACid:30218796	Pavir.J02847.1.p|PACid:30218796	2584	83527	144	144	19	19	30.4	5.17	314215	1	0	0	902.51	1803.01	2	1803	0.0016	0	32.56	21	33	0.0037	K	ELEGICNPIIAK	M	Methylthio (C)	0.000002000000.0			File4251 Spectrum160450 scans: 36148	126/130C	---	127c/130C	---	128c/130C	---	129c/130C	---	131/130C	---	127n/130C	---	128n/130C	---	129n/130C	---
1	3	Pavir.J02847.1.p|PACid:30218796	Pavir.J02847.1.p|PACid:30218796	2584	83527	144	144	19	19	30.4	5.17	314218	1	0	0	902.51	1803.01	2	1803	0.0019	0	39.09	20	33	0.00063	K	ELEGICNPIIAK	M	Methylthio (C)	0.000002000000.0			File4251 Spectrum161132 scans: 36931	126/130C	---	127c/130C	---	128c/130C	---	129c/130C	---	131/130C	---	127n/130C	---	128n/130C	---	129n/130C	---
1	3	Pavir.J02847.1.p|PACid:30218796	Pavir.J02847.1.p|PACid:30218796	2584	83527	144	144	19	19	30.4	5.17	314220	1	0	0	902.51	1803.01	2	1803	0.002	0	24.59	16	33	0.0079	K	ELEGICNPIIAK	M	Methylthio (C)	0.000002000000.0			File4251 Spectrum161349 scans: 37180	126/130C	---	127c/130C	---	128c/130C	---	129c/130C	---	131/130C	---	127n/130C	---	128n/130C	---	129n/130C	---
1	3	Pavir.J02847.1.p|PACid:30218796	Pavir.J02847.1.p|PACid:30218796	2584	83527	144	144	19	19	30.4	5.17	355078	1	0	0	952.951	1903.89	2	1903.89	0.001	0	30.01	19	29	0.0046	K	ATAGDTHLGGEDFDNR	M					File4250 Spectrum94882 scans: 12304	126/130C	---	127c/130C	---	128c/130C	---	129c/130C	---	131/130C	---	127n/130C	---	128n/130C	---	129n/130C	---
1	3	Pavir.J02847.1.p|PACid:30218796	Pavir.J02847.1.p|PACid:30218796	2584	83527	144	144	19	19	30.4	5.17	355082	1	0	0	635.636	1903.89	3	1903.89	0.0011	0	26.6	19	29	0.0093	K	ATAGDTHLGGEDFDNR	M					File4249 Spectrum50395 scans: 11953	126/130C	---	127c/130C	---	128c/130C	---	129c/130C	---	131/130C	---	127n/130C	---	128n/130C	---	129n/130C	---
1	3	Pavir.J02847.1.p|PACid:30218796	Pavir.J02847.1.p|PACid:30218796	2584	83527	144	144	19	19	30.4	5.17	355084	1	0	0	952.951	1903.89	2	1903.89	0.0012	0	48.47	23	29	0.00014	K	ATAGDTHLGGEDFDNR	M					File4264 Spectrum678852 scans: 12447	126/130C	---	127c/130C	---	128c/130C	---	129c/130C	---	131/130C	---	127n/130C	---	128n/130C	---	129n/130C	---
1	3	Pavir.J02847.1.p|PACid:30218796	Pavir.J02847.1.p|PACid:30218796	2584	83527	144	144	19	19	30.4	5.17	355090	1	0	0	635.636	1903.89	3	1903.89	0.0012	0	25.43	17	29	0.0087	K	ATAGDTHLGGEDFDNR	M					File4264 Spectrum678841 scans: 12436	126/130C	---	127c/130C	---	128c/130C	---	129c/130C	---	131/130C	---	127n/130C	---	128n/130C	---	129n/130C	---
1	3	Pavir.J02847.1.p|PACid:30218796	Pavir.J02847.1.p|PACid:30218796	2584	83527	144	144	19	19	30.4	5.17	355099	1	0	0	635.636	1903.89	3	1903.89	0.0015	0	28.43	19	29	0.0061	K	ATAGDTHLGGEDFDNR	M					File4264 Spectrum678589 scans: 12161	126/130C	---	127c/130C	---	128c/130C	---	129c/130C	---	131/130C	---	127n/130C	---	128n/130C	---	129n/130C	---
1	3	Pavir.J02847.1.p|PACid:30218796	Pavir.J02847.1.p|PACid:30218796	2584	83527	144	144	19	19	30.4	5.17	355117	1	0	0	635.637	1903.89	3	1903.89	0.0018	0	24.56	15	29	0.006	K	ATAGDTHLGGEDFDNR	M					File4251 Spectrum138939 scans: 12369	126/130C	---	127c/130C	---	128c/130C	---	129c/130C	---	131/130C	---	127n/130C	---	128n/130C	---	129n/130C	---
1	3	Pavir.J02847.1.p|PACid:30218796	Pavir.J02847.1.p|PACid:30218796	2584	83527	144	144	19	19	30.4	5.17	355120	1	0	0	952.951	1903.89	2	1903.89	0.002	0	25.57	14	29	0.004	K	ATAGDTHLGGEDFDNR	M					File4264 Spectrum678687 scans: 12267	126/130C	---	127c/130C	---	128c/130C	---	129c/130C	---	131/130C	---	127n/130C	---	128n/130C	---	129n/130C	---
1	3	Pavir.J02847.1.p|PACid:30218796	Pavir.J02847.1.p|PACid:30218796	2584	83527	144	144	19	19	30.4	5.17	355125	1	0	0	635.637	1903.89	3	1903.89	0.002	0	28.51	18	29	0.0046	K	ATAGDTHLGGEDFDNR	M					File4249 Spectrum81797 scans: 46743	126/130C	---	127c/130C	---	128c/130C	---	129c/130C	---	131/130C	---	127n/130C	---	128n/130C	---	129n/130C	---
1	3	Pavir.J02847.1.p|PACid:30218796	Pavir.J02847.1.p|PACid:30218796	2584	83527	144	144	19	19	30.4	5.17	355126	1	0	0	635.637	1903.89	3	1903.89	0.002	0	23.11	14	29	0.0068	K	ATAGDTHLGGEDFDNR	M					File4249 Spectrum82164 scans: 47167	126/130C	---	127c/130C	---	128c/130C	---	129c/130C	---	131/130C	---	127n/130C	---	128n/130C	---	129n/130C	---
1	3	Pavir.J02847.1.p|PACid:30218796	Pavir.J02847.1.p|PACid:30218796	2584	83527	144	144	19	19	30.4	5.17	355137	1	0	0	952.952	1903.89	2	1903.89	0.0023	0	72.14	24	29	8.5e-07	K	ATAGDTHLGGEDFDNR	M					File4249 Spectrum50647 scans: 12237	126/130C	---	127c/130C	---	128c/130C	---	129c/130C	---	131/130C	---	127n/130C	---	128n/130C	---	129n/130C	---
1	3	Pavir.J02847.1.p|PACid:30218796	Pavir.J02847.1.p|PACid:30218796	2584	83527	144	144	19	19	30.4	5.17	355147	1	0	0	635.637	1903.89	3	1903.89	0.0025	0	29.63	21	29	0.0086	K	ATAGDTHLGGEDFDNR	M					File4249 Spectrum50625 scans: 12212	126/130C	---	127c/130C	---	128c/130C	---	129c/130C	---	131/130C	---	127n/130C	---	128n/130C	---	129n/130C	---
1	3	Pavir.J02847.1.p|PACid:30218796	Pavir.J02847.1.p|PACid:30218796	2584	83527	144	144	19	19	30.4	5.17	355151	1	0	0	952.952	1903.89	2	1903.89	0.0029	0	23.56	14	29	0.0062	K	ATAGDTHLGGEDFDNR	M					File4249 Spectrum50578 scans: 12158	126/130C	---	127c/130C	---	128c/130C	---	129c/130C	---	131/130C	---	127n/130C	---	128n/130C	---	129n/130C	---
1	3	Pavir.J02847.1.p|PACid:30218796	Pavir.J02847.1.p|PACid:30218796	2584	83527	144	144	19	19	30.4	5.17	355153	1	0	0	952.952	1903.89	2	1903.89	0.0032	0	26.18	18	29	0.0082	K	ATAGDTHLGGEDFDNR	M					File4255 Spectrum309583 scans: 11602	126/130C	---	127c/130C	---	128c/130C	---	129c/130C	---	131/130C	---	127n/130C	---	128n/130C	---	129n/130C	---
1	3	Pavir.J02847.1.p|PACid:30218796	Pavir.J02847.1.p|PACid:30218796	2584	83527	144	144	19	19	30.4	5.17	355155	1	0	0	952.952	1903.89	2	1903.89	0.0033	0	46.57	22	29	0.0002	K	ATAGDTHLGGEDFDNR	M					File4249 Spectrum50421 scans: 11981	126/130C	---	127c/130C	---	128c/130C	---	129c/130C	---	131/130C	---	127n/130C	---	128n/130C	---	129n/130C	---
1	3	Pavir.J02847.1.p|PACid:30218796	Pavir.J02847.1.p|PACid:30218796	2584	83527	144	144	19	19	30.4	5.17	355156	1	0	0	952.952	1903.89	2	1903.89	0.0035	0	49.46	23	29	0.00012	K	ATAGDTHLGGEDFDNR	M					File4264 Spectrum678597 scans: 12169	126/130C	---	127c/130C	---	128c/130C	---	129c/130C	---	131/130C	---	127n/130C	---	128n/130C	---	129n/130C	---
1	3	Pavir.J02847.1.p|PACid:30218796	Pavir.J02847.1.p|PACid:30218796	2584	83527	144	144	19	19	30.4	5.17	357176	1	0	0	955.503	1908.99	2	1908.99	0.0018	0	50.02	20	33	5.5e-05	K	NAVVTVPAYFNDSQR	Q					File4248 Spectrum20614 scans: 24485	126/130C	---	127c/130C	---	128c/130C	---	129c/130C	---	131/130C	---	127n/130C	---	128n/130C	---	129n/130C	---
1	3	Pavir.J02847.1.p|PACid:30218796	Pavir.J02847.1.p|PACid:30218796	2584	83527	144	144	19	19	30.4	5.17	357181	1	0	0	955.503	1908.99	2	1908.99	0.0024	0	63.11	30	33	2.5e-05	K	NAVVTVPAYFNDSQR	Q					File4248 Spectrum20373 scans: 24222	126/130C	---	127c/130C	---	128c/130C	---	129c/130C	---	131/130C	---	127n/130C	---	128n/130C	---	129n/130C	---
1	3	Pavir.J02847.1.p|PACid:30218796	Pavir.J02847.1.p|PACid:30218796	2584	83527	144	144	19	19	30.4	5.17	357187	1	0	0	637.338	1908.99	3	1908.99	0.0031	0	31.81	14	33	0.001	K	NAVVTVPAYFNDSQR	Q					File4248 Spectrum20415 scans: 24268	126/130C	---	127c/130C	---	128c/130C	---	129c/130C	---	131/130C	---	127n/130C	---	128n/130C	---	129n/130C	---
1	3	Pavir.J02847.1.p|PACid:30218796	Pavir.J02847.1.p|PACid:30218796	2584	83527	144	144	19	19	30.4	5.17	357511	1	0	0	955.995	1909.98	2	1909.97	0.0019	0	29.01	15	33	0.0023	K	NAVVTVPAYFNDSQR	Q	Deamidated (NQ)	0.000000000010000.0			File4252 Spectrum194091 scans: 25874	126/130C	---	127c/130C	---	128c/130C	---	129c/130C	---	131/130C	---	127n/130C	---	128n/130C	---	129n/130C	---
1	3	Pavir.J02847.1.p|PACid:30218796	Pavir.J02847.1.p|PACid:30218796	2584	83527	144	144	19	19	30.4	5.17	357513	1	0	0	637.666	1909.98	3	1909.97	0.002	0	40.26	16	33	0.0002	K	NAVVTVPAYFNDSQR	Q	Deamidated (NQ)	0.000000000010000.0			File4253 Spectrum236682 scans: 25863	126/130C	---	127c/130C	---	128c/130C	---	129c/130C	---	131/130C	---	127n/130C	---	128n/130C	---	129n/130C	---
1	3	Pavir.J02847.1.p|PACid:30218796	Pavir.J02847.1.p|PACid:30218796	2584	83527	144	144	19	19	30.4	5.17	434546	1	0	0	706.745	2117.21	3	2117.21	0	0	27.74	16	33	0.004	R	IINEPTAAAIAYGLDK	K					File4262 Spectrum613316 scans: 36497	126/130C	---	127c/130C	---	128c/130C	---	129c/130C	---	131/130C	---	127n/130C	---	128n/130C	---	129n/130C	---
1	3	Pavir.J02847.1.p|PACid:30218796	Pavir.J02847.1.p|PACid:30218796	2584	83527	144	144	19	19	30.4	5.17	434552	1	0	0	706.745	2117.21	3	2117.21	0.0009	0	25.13	14	33	0.0044	R	IINEPTAAAIAYGLDK	K					File4263 Spectrum657457 scans: 36836	126/130C	---	127c/130C	---	128c/130C	---	129c/130C	---	131/130C	---	127n/130C	---	128n/130C	---	129n/130C	---
1	3	Pavir.J02847.1.p|PACid:30218796	Pavir.J02847.1.p|PACid:30218796	2584	83527	144	144	19	19	30.4	5.17	434557	1	0	0	1059.62	2117.22	2	2117.21	0.0017	0	89.12	26	33	2.9e-08	R	IINEPTAAAIAYGLDK	K					File4263 Spectrum656566 scans: 35811	126/130C	---	127c/130C	---	128c/130C	---	129c/130C	---	131/130C	---	127n/130C	---	128n/130C	---	129n/130C	---
1	3	Pavir.J02847.1.p|PACid:30218796	Pavir.J02847.1.p|PACid:30218796	2584	83527	144	144	19	19	30.4	5.17	434558	1	0	0	706.746	2117.22	3	2117.21	0.0018	0	28.56	18	33	0.0048	R	IINEPTAAAIAYGLDK	K					File4263 Spectrum657247 scans: 36586	126/130C	---	127c/130C	---	128c/130C	---	129c/130C	---	131/130C	---	127n/130C	---	128n/130C	---	129n/130C	---
1	3	Pavir.J02847.1.p|PACid:30218796	Pavir.J02847.1.p|PACid:30218796	2584	83527	144	144	19	19	30.4	5.17	434563	1	0	0	706.746	2117.22	3	2117.21	0.0021	0	41.05	23	33	0.00084	R	IINEPTAAAIAYGLDK	K					File4262 Spectrum612447 scans: 35535	126/130C	---	127c/130C	---	128c/130C	---	129c/130C	---	131/130C	---	127n/130C	---	128n/130C	---	129n/130C	---
1	3	Pavir.J02847.1.p|PACid:30218796	Pavir.J02847.1.p|PACid:30218796	2584	83527	144	144	19	19	30.4	5.17	434564	1	0	0	706.746	2117.22	3	2117.21	0.0021	0	27.8	17	33	0.005	R	IINEPTAAAIAYGLDK	K					File4264 Spectrum699868 scans: 35324	126/130C	---	127c/130C	---	128c/130C	---	129c/130C	---	131/130C	---	127n/130C	---	128n/130C	---	129n/130C	---
1	3	Pavir.J02847.1.p|PACid:30218796	Pavir.J02847.1.p|PACid:30218796	2584	83527	144	144	19	19	30.4	5.17	434568	1	0	0	706.746	2117.22	3	2117.21	0.0023	0	30.93	22	33	0.007	R	IINEPTAAAIAYGLDK	K					File4263 Spectrum657027 scans: 36335	126/130C	---	127c/130C	---	128c/130C	---	129c/130C	---	131/130C	---	127n/130C	---	128n/130C	---	129n/130C	---
1	3	Pavir.J02847.1.p|PACid:30218796	Pavir.J02847.1.p|PACid:30218796	2584	83527	144	144	19	19	30.4	5.17	434569	1	0	0	706.746	2117.22	3	2117.21	0.0023	0	37.09	21	33	0.0013	R	IINEPTAAAIAYGLDK	K					File4263 Spectrum656808 scans: 36086	126/130C	---	127c/130C	---	128c/130C	---	129c/130C	---	131/130C	---	127n/130C	---	128n/130C	---	129n/130C	---
1	3	Pavir.J02847.1.p|PACid:30218796	Pavir.J02847.1.p|PACid:30218796	2584	83527	144	144	19	19	30.4	5.17	434571	1	0	0	706.746	2117.22	3	2117.21	0.0025	0	36.61	17	33	0.00056	R	IINEPTAAAIAYGLDK	K					File4263 Spectrum656356 scans: 35571	126/130C	---	127c/130C	---	128c/130C	---	129c/130C	---	131/130C	---	127n/130C	---	128n/130C	---	129n/130C	---
1	3	Pavir.J02847.1.p|PACid:30218796	Pavir.J02847.1.p|PACid:30218796	2584	83527	144	144	19	19	30.4	5.17	434580	1	0	0	1059.62	2117.22	2	2117.21	0.0039	0	55.29	27	33	7.5e-05	R	IINEPTAAAIAYGLDK	K					File4262 Spectrum612488 scans: 35580	126/130C	---	127c/130C	---	128c/130C	---	129c/130C	---	131/130C	---	127n/130C	---	128n/130C	---	129n/130C	---
1	3	Pavir.J02847.1.p|PACid:30218796	Pavir.J02847.1.p|PACid:30218796	2584	83527	144	144	19	19	30.4	5.17	434581	1	0	0	706.746	2117.22	3	2117.21	0.004	0	36.39	18	33	0.00079	R	IINEPTAAAIAYGLDK	K					File4263 Spectrum656581 scans: 35828	126/130C	---	127c/130C	---	128c/130C	---	129c/130C	---	131/130C	---	127n/130C	---	128n/130C	---	129n/130C	---
1	3	Pavir.J02847.1.p|PACid:30218796	Pavir.J02847.1.p|PACid:30218796	2584	83527	144	144	19	19	30.4	5.17	434582	1	0	0	706.746	2117.22	3	2117.21	0.004	0	35.95	16	33	0.00054	R	IINEPTAAAIAYGLDK	K					File4249 Spectrum71622 scans: 35126	126/130C	---	127c/130C	---	128c/130C	---	129c/130C	---	131/130C	---	127n/130C	---	128n/130C	---	129n/130C	---
1	3	Pavir.J02847.1.p|PACid:30218796	Pavir.J02847.1.p|PACid:30218796	2584	83527	144	144	19	19	30.4	5.17	434587	1	0	0	1059.62	2117.22	2	2117.21	0.0061	0	42.64	26	33	0.0011	R	IINEPTAAAIAYGLDK	K					File4262 Spectrum612243 scans: 35310	126/130C	---	127c/130C	---	128c/130C	---	129c/130C	---	131/130C	---	127n/130C	---	128n/130C	---	129n/130C	---
1	3	Pavir.J02847.1.p|PACid:30218796	Pavir.J02847.1.p|PACid:30218796	2584	83527	144	144	19	19	30.4	5.17	439484	1	0	0	712.074	2133.2	3	2133.2	0.0014	1	23.4	15	33	0.0073	R	QATKDAGVISGLNVMR	I	Oxidation (M)	0.0000000000000030.0			File4260 Spectrum507927 scans: 18342	126/130C	---	127c/130C	---	128c/130C	---	129c/130C	---	131/130C	---	127n/130C	---	128n/130C	---	129n/130C	---
1	3	Pavir.J02847.1.p|PACid:30218796	Pavir.J02847.1.p|PACid:30218796	2584	83527	144	144	19	19	30.4	5.17	439485	1	0	0	712.074	2133.2	3	2133.2	0.0027	1	25.16	15	33	0.0059	R	QATKDAGVISGLNVMR	I	Oxidation (M)	0.0000000000000030.0			File4264 Spectrum684096 scans: 18148	126/130C	---	127c/130C	---	128c/130C	---	129c/130C	---	131/130C	---	127n/130C	---	128n/130C	---	129n/130C	---
1	3	Pavir.J02847.1.p|PACid:30218796	Pavir.J02847.1.p|PACid:30218796	2584	83527	144	144	19	19	30.4	5.17	534108	1	0	0	825.832	2474.47	3	2474.47	0.0013	1	43.98		30	0.0023	R	IINEPTAAAIAYGLDKK	A					File4253 Spectrum245096 scans: 35218	126/130C	---	127c/130C	---	128c/130C	---	129c/130C	---	131/130C	---	127n/130C	---	128n/130C	---	129n/130C	---
1	3	Pavir.J02847.1.p|PACid:30218796	Pavir.J02847.1.p|PACid:30218796	2584	83527	144	144	19	19	30.4	5.17	534110	1	0	0	619.625	2474.47	4	2474.47	0.0014	1	25.86	18	30	0.0083	R	IINEPTAAAIAYGLDKK	A					File4253 Spectrum245292 scans: 35441	126/130C	---	127c/130C	---	128c/130C	---	129c/130C	---	131/130C	---	127n/130C	---	128n/130C	---	129n/130C	---
1	3	Pavir.J02847.1.p|PACid:30218796	Pavir.J02847.1.p|PACid:30218796	2584	83527	144	144	19	19	30.4	5.17	534117	1	0	0	619.626	2474.47	4	2474.47	0.0017	1	26.76	17	30	0.0054	R	IINEPTAAAIAYGLDKK	A					File4255 Spectrum329280 scans: 33112	126/130C	---	127c/130C	---	128c/130C	---	129c/130C	---	131/130C	---	127n/130C	---	128n/130C	---	129n/130C	---
1	3	Pavir.J02847.1.p|PACid:30218796	Pavir.J02847.1.p|PACid:30218796	2584	83527	144	144	19	19	30.4	5.17	534125	1	0	0	825.832	2474.47	3	2474.47	0.0021	1	38.2	30	30	0.0085	R	IINEPTAAAIAYGLDKK	A					File4253 Spectrum245541 scans: 35729	126/130C	---	127c/130C	---	128c/130C	---	129c/130C	---	131/130C	---	127n/130C	---	128n/130C	---	129n/130C	---
1	3	Pavir.J02847.1.p|PACid:30218796	Pavir.J02847.1.p|PACid:30218796	2584	83527	144	144	19	19	30.4	5.17	534129	1	0	0	619.626	2474.47	4	2474.47	0.0022	1	27.8	14	30	0.0025	R	IINEPTAAAIAYGLDKK	A					File4254 Spectrum288468 scans: 35663	126/130C	---	127c/130C	---	128c/130C	---	129c/130C	---	131/130C	---	127n/130C	---	128n/130C	---	129n/130C	---
1	3	Pavir.J02847.1.p|PACid:30218796	Pavir.J02847.1.p|PACid:30218796	2584	83527	144	144	19	19	30.4	5.17	534134	1	0	0	825.832	2474.47	3	2474.47	0.0023	1	55.72		30	0.00015	R	IINEPTAAAIAYGLDKK	A					File4253 Spectrum245319 scans: 35473	126/130C	---	127c/130C	---	128c/130C	---	129c/130C	---	131/130C	---	127n/130C	---	128n/130C	---	129n/130C	---
1	3	Pavir.J02847.1.p|PACid:30218796	Pavir.J02847.1.p|PACid:30218796	2584	83527	144	144	19	19	30.4	5.17	534135	1	0	0	825.832	2474.47	3	2474.47	0.0023	1	48.75		30	0.00076	R	IINEPTAAAIAYGLDKK	A					File4253 Spectrum244866 scans: 34957	126/130C	---	127c/130C	---	128c/130C	---	129c/130C	---	131/130C	---	127n/130C	---	128n/130C	---	129n/130C	---
1	3	Pavir.J02847.1.p|PACid:30218796	Pavir.J02847.1.p|PACid:30218796	2584	83527	144	144	19	19	30.4	5.17	534136	1	0	0	825.832	2474.47	3	2474.47	0.0023	1	47.69		30	0.00098	R	IINEPTAAAIAYGLDKK	A					File4254 Spectrum288171 scans: 35326	126/130C	---	127c/130C	---	128c/130C	---	129c/130C	---	131/130C	---	127n/130C	---	128n/130C	---	129n/130C	---
1	3	Pavir.J02847.1.p|PACid:30218796	Pavir.J02847.1.p|PACid:30218796	2584	83527	144	144	19	19	30.4	5.17	534143	1	0	0	825.832	2474.47	3	2474.47	0.0024	1	39.05	26	30	0.0027	R	IINEPTAAAIAYGLDKK	A					File4253 Spectrum244174 scans: 34172	126/130C	---	127c/130C	---	128c/130C	---	129c/130C	---	131/130C	---	127n/130C	---	128n/130C	---	129n/130C	---
1	3	Pavir.J02847.1.p|PACid:30218796	Pavir.J02847.1.p|PACid:30218796	2584	83527	144	144	19	19	30.4	5.17	534147	1	0	0	825.832	2474.47	3	2474.47	0.0026	1	37.02	23	30	0.0023	R	IINEPTAAAIAYGLDKK	A					File4254 Spectrum288415 scans: 35603	126/130C	---	127c/130C	---	128c/130C	---	129c/130C	---	131/130C	---	127n/130C	---	128n/130C	---	129n/130C	---
1	3	Pavir.J02847.1.p|PACid:30218796	Pavir.J02847.1.p|PACid:30218796	2584	83527	144	144	19	19	30.4	5.17	534148	1	0	0	825.832	2474.47	3	2474.47	0.0026	1	48.89		30	0.00074	R	IINEPTAAAIAYGLDKK	A					File4254 Spectrum287940 scans: 35065	126/130C	---	127c/130C	---	128c/130C	---	129c/130C	---	131/130C	---	127n/130C	---	128n/130C	---	129n/130C	---
1	3	Pavir.J02847.1.p|PACid:30218796	Pavir.J02847.1.p|PACid:30218796	2584	83527	144	144	19	19	30.4	5.17	534149	1	0	0	825.832	2474.47	3	2474.47	0.0026	1	43.76	25	30	0.00074	R	IINEPTAAAIAYGLDKK	A					File4254 Spectrum287241 scans: 34274	126/130C	---	127c/130C	---	128c/130C	---	129c/130C	---	131/130C	---	127n/130C	---	128n/130C	---	129n/130C	---
1	3	Pavir.J02847.1.p|PACid:30218796	Pavir.J02847.1.p|PACid:30218796	2584	83527	144	144	19	19	30.4	5.17	534155	1	0	0	619.626	2474.47	4	2474.47	0.0029	1	29.28	14	30	0.0018	R	IINEPTAAAIAYGLDKK	A					File4253 Spectrum246194 scans: 36483	126/130C	---	127c/130C	---	128c/130C	---	129c/130C	---	131/130C	---	127n/130C	---	128n/130C	---	129n/130C	---
1	3	Pavir.J02847.1.p|PACid:30218796	Pavir.J02847.1.p|PACid:30218796	2584	83527	144	144	19	19	30.4	5.17	534161	1	0	0	825.832	2474.47	3	2474.47	0.003	1	45.42		30	0.0016	R	IINEPTAAAIAYGLDKK	A					File4254 Spectrum288642 scans: 35862	126/130C	---	127c/130C	---	128c/130C	---	129c/130C	---	131/130C	---	127n/130C	---	128n/130C	---	129n/130C	---
1	3	Pavir.J02847.1.p|PACid:30218796	Pavir.J02847.1.p|PACid:30218796	2584	83527	144	144	19	19	30.4	5.17	534162	1	0	0	825.832	2474.47	3	2474.47	0.003	1	50.42	28	30	0.00033	R	IINEPTAAAIAYGLDKK	A					File4253 Spectrum244640 scans: 34701	126/130C	---	127c/130C	---	128c/130C	---	129c/130C	---	131/130C	---	127n/130C	---	128n/130C	---	129n/130C	---
1	3	Pavir.J02847.1.p|PACid:30218796	Pavir.J02847.1.p|PACid:30218796	2584	83527	144	144	19	19	30.4	5.17	534166	1	0	0	619.626	2474.47	4	2474.47	0.0032	1	25.78	14	30	0.0038	R	IINEPTAAAIAYGLDKK	A					File4254 Spectrum288242 scans: 35406	126/130C	---	127c/130C	---	128c/130C	---	129c/130C	---	131/130C	---	127n/130C	---	128n/130C	---	129n/130C	---
1	3	Pavir.J02847.1.p|PACid:30218796	Pavir.J02847.1.p|PACid:30218796	2584	83527	144	144	19	19	30.4	5.17	534167	1	0	0	619.626	2474.47	4	2474.47	0.0032	1	27.05	15	30	0.0032	R	IINEPTAAAIAYGLDKK	A					File4254 Spectrum288011 scans: 35144	126/130C	---	127c/130C	---	128c/130C	---	129c/130C	---	131/130C	---	127n/130C	---	128n/130C	---	129n/130C	---
1	3	Pavir.J02847.1.p|PACid:30218796	Pavir.J02847.1.p|PACid:30218796	2584	83527	144	144	19	19	30.4	5.17	534180	1	0	0	619.626	2474.48	4	2474.47	0.0036	1	24	14	30	0.0056	R	IINEPTAAAIAYGLDKK	A					File4254 Spectrum287304 scans: 34345	126/130C	---	127c/130C	---	128c/130C	---	129c/130C	---	131/130C	---	127n/130C	---	128n/130C	---	129n/130C	---
1	3	Pavir.J02847.1.p|PACid:30218796	Pavir.J02847.1.p|PACid:30218796	2584	83527	144	144	19	19	30.4	5.17	534183	1	0	0	825.832	2474.48	3	2474.47	0.0037	1	40.95	26	30	0.0019	R	IINEPTAAAIAYGLDKK	A					File4253 Spectrum244408 scans: 34438	126/130C	---	127c/130C	---	128c/130C	---	129c/130C	---	131/130C	---	127n/130C	---	128n/130C	---	129n/130C	---
1	3	Pavir.J02847.1.p|PACid:30218796	Pavir.J02847.1.p|PACid:30218796	2584	83527	144	144	19	19	30.4	5.17	534184	1	0	0	825.832	2474.48	3	2474.47	0.0037	1	49.25		30	0.00066	R	IINEPTAAAIAYGLDKK	A					File4254 Spectrum287713 scans: 34808	126/130C	---	127c/130C	---	128c/130C	---	129c/130C	---	131/130C	---	127n/130C	---	128n/130C	---	129n/130C	---
1	3	Pavir.J02847.1.p|PACid:30218796	Pavir.J02847.1.p|PACid:30218796	2584	83527	144	144	19	19	30.4	5.17	534185	1	0	0	825.832	2474.48	3	2474.47	0.0037	1	57.11	28	30	7.7e-05	R	IINEPTAAAIAYGLDKK	A					File4253 Spectrum243944 scans: 33911	126/130C	---	127c/130C	---	128c/130C	---	129c/130C	---	131/130C	---	127n/130C	---	128n/130C	---	129n/130C	---
1	3	Pavir.J02847.1.p|PACid:30218796	Pavir.J02847.1.p|PACid:30218796	2584	83527	144	144	19	19	30.4	5.17	534189	1	0	0	825.832	2474.48	3	2474.47	0.0039	1	48.21	28	30	0.00055	R	IINEPTAAAIAYGLDKK	A					File4254 Spectrum287474 scans: 34538	126/130C	---	127c/130C	---	128c/130C	---	129c/130C	---	131/130C	---	127n/130C	---	128n/130C	---	129n/130C	---
1	3	Pavir.J02847.1.p|PACid:30218796	Pavir.J02847.1.p|PACid:30218796	2584	83527	144	144	19	19	30.4	5.17	534197	1	0	0	825.833	2474.48	3	2474.47	0.0044	1	40.07	22	30	0.00085	R	IINEPTAAAIAYGLDKK	A					File4255 Spectrum329466 scans: 33316	126/130C	---	127c/130C	---	128c/130C	---	129c/130C	---	131/130C	---	127n/130C	---	128n/130C	---	129n/130C	---
1	3	Pavir.J02847.1.p|PACid:30218796	Pavir.J02847.1.p|PACid:30218796	2584	83527	144	144	19	19	30.4	5.17	534214	1	0	0	619.627	2474.48	4	2474.47	0.0056	1	25.51	14	30	0.004	R	IINEPTAAAIAYGLDKK	A					File4254 Spectrum287775 scans: 34878	126/130C	---	127c/130C	---	128c/130C	---	129c/130C	---	131/130C	---	127n/130C	---	128n/130C	---	129n/130C	---
1	3	Pavir.J02847.1.p|PACid:30218796	Pavir.J02847.1.p|PACid:30218796	2584	83527	144	144	19	19	30.4	5.17	534435	1	0	0	826.159	2475.46	3	2475.46	0.0001	1	43.38	28	31	0.0016	R	IINEPTAAAIAYGLDKK	A	Deamidated (NQ)	0.00100000000000000.0			File4250 Spectrum115108 scans: 34357	126/130C	---	127c/130C	---	128c/130C	---	129c/130C	---	131/130C	---	127n/130C	---	128n/130C	---	129n/130C	---
1	3	Pavir.J02847.1.p|PACid:30218796	Pavir.J02847.1.p|PACid:30218796	2584	83527	144	144	19	19	30.4	5.17	534436	1	0	0	619.871	2475.46	4	2475.46	0.0008	1	27.43	14	31	0.0027	R	IINEPTAAAIAYGLDKK	A	Deamidated (NQ)	0.00100000000000000.0			File4249 Spectrum71046 scans: 34495	126/130C	---	127c/130C	---	128c/130C	---	129c/130C	---	131/130C	---	127n/130C	---	128n/130C	---	129n/130C	---
1	3	Pavir.J02847.1.p|PACid:30218796	Pavir.J02847.1.p|PACid:30218796	2584	83527	144	144	19	19	30.4	5.17	534437	1	0	0	826.16	2475.46	3	2475.46	0.0013	1	46.13	30	31	0.0014	R	IINEPTAAAIAYGLDKK	A	Deamidated (NQ)	0.00100000000000000.0			File4250 Spectrum115354 scans: 34627	126/130C	---	127c/130C	---	128c/130C	---	129c/130C	---	131/130C	---	127n/130C	---	128n/130C	---	129n/130C	---
1	3	Pavir.J02847.1.p|PACid:30218796	Pavir.J02847.1.p|PACid:30218796	2584	83527	144	144	19	19	30.4	5.17	534439	1	0	0	826.16	2475.46	3	2475.46	0.0022	1	33.16	21	31	0.0033	R	IINEPTAAAIAYGLDKK	A	Deamidated (NQ)	0.00100000000000000.0			File4250 Spectrum115604 scans: 34903	126/130C	---	127c/130C	---	128c/130C	---	129c/130C	---	131/130C	---	127n/130C	---	128n/130C	---	129n/130C	---
1	3	Pavir.J02847.1.p|PACid:30218796	Pavir.J02847.1.p|PACid:30218796	2584	83527	144	144	19	19	30.4	5.17	534443	1	0	0	826.161	2475.46	3	2475.46	0.0044	1	38.23	16	31	0.0003	R	IINEPTAAAIAYGLDKK	A	Deamidated (NQ)	0.00100000000000000.0			File4249 Spectrum71133 scans: 34589	126/130C	---	127c/130C	---	128c/130C	---	129c/130C	---	131/130C	---	127n/130C	---	128n/130C	---	129n/130C	---
1	3	Pavir.J02847.1.p|PACid:30218796	Pavir.J02847.1.p|PACid:30218796	2584	83527	144	144	19	19	30.4	5.17	616749	1	0	0	963.149	2886.42	3	2886.42	0.0007	0	30.1	20	34	0.0052	K	EQVFSTYSDNQPGVLIQVYEGER	A					File4264 Spectrum699989 scans: 35457	126/130C	---	127c/130C	---	128c/130C	---	129c/130C	---	131/130C	---	127n/130C	---	128n/130C	---	129n/130C	---
1	3	Pavir.J02847.1.p|PACid:30218796	Pavir.J02847.1.p|PACid:30218796	2584	83527	144	144	19	19	30.4	5.17	616753	1	0	0	963.149	2886.42	3	2886.42	0.0009	0	38.63	20	34	0.00074	K	EQVFSTYSDNQPGVLIQVYEGER	A					File4250 Spectrum115754 scans: 35068	126/130C	---	127c/130C	---	128c/130C	---	129c/130C	---	131/130C	---	127n/130C	---	128n/130C	---	129n/130C	---
1	3	Pavir.J02847.1.p|PACid:30218796	Pavir.J02847.1.p|PACid:30218796	2584	83527	144	144	19	19	30.4	5.17	616764	1	0	0	963.149	2886.43	3	2886.42	0.0025	0	32.6	18	34	0.0021	K	EQVFSTYSDNQPGVLIQVYEGER	A					File4264 Spectrum699745 scans: 35190	126/130C	---	127c/130C	---	128c/130C	---	129c/130C	---	131/130C	---	127n/130C	---	128n/130C	---	129n/130C	---
1	3	Pavir.J02847.1.p|PACid:30218796	Pavir.J02847.1.p|PACid:30218796	2584	83527	144	144	19	19	30.4	5.17	616767	1	0	0	963.149	2886.43	3	2886.42	0.0028	0	54.68	20	34	2.1e-05	K	EQVFSTYSDNQPGVLIQVYEGER	A					File4249 Spectrum71134 scans: 34591	126/130C	---	127c/130C	---	128c/130C	---	129c/130C	---	131/130C	---	127n/130C	---	128n/130C	---	129n/130C	---
1	3	Pavir.J02847.1.p|PACid:30218796	Pavir.J02847.1.p|PACid:30218796	2584	83527	144	144	19	19	30.4	5.17	616768	1	0	0	963.149	2886.43	3	2886.42	0.0029	0	25.23	17	34	0.0094	K	EQVFSTYSDNQPGVLIQVYEGER	A					File4264 Spectrum700226 scans: 35717	126/130C	---	127c/130C	---	128c/130C	---	129c/130C	---	131/130C	---	127n/130C	---	128n/130C	---	129n/130C	---
1	3	Pavir.J02847.1.p|PACid:30218796	Pavir.J02847.1.p|PACid:30218796	2584	83527	144	144	19	19	30.4	5.17	616771	1	0	0	963.15	2886.43	3	2886.42	0.0031	0	44.13	20	34	0.00022	K	EQVFSTYSDNQPGVLIQVYEGER	A					File4264 Spectrum699510 scans: 34931	126/130C	---	127c/130C	---	128c/130C	---	129c/130C	---	131/130C	---	127n/130C	---	128n/130C	---	129n/130C	---
1	3	Pavir.J02847.1.p|PACid:30218796	Pavir.J02847.1.p|PACid:30218796	2584	83527	144	144	19	19	30.4	5.17	616773	1	0	0	722.614	2886.43	4	2886.42	0.0033	0	28.04	19	34	0.0064	K	EQVFSTYSDNQPGVLIQVYEGER	A					File4249 Spectrum71342 scans: 34819	126/130C	---	127c/130C	---	128c/130C	---	129c/130C	---	131/130C	---	127n/130C	---	128n/130C	---	129n/130C	---
1	3	Pavir.J02847.1.p|PACid:30218796	Pavir.J02847.1.p|PACid:30218796	2584	83527	144	144	19	19	30.4	5.17	616779	1	0	0	963.15	2886.43	3	2886.42	0.0044	0	34.38	16	34	0.00082	K	EQVFSTYSDNQPGVLIQVYEGER	A					File4249 Spectrum71375 scans: 34855	126/130C	---	127c/130C	---	128c/130C	---	129c/130C	---	131/130C	---	127n/130C	---	128n/130C	---	129n/130C	---
1	3	Pavir.J02847.1.p|PACid:30218796	Pavir.J02847.1.p|PACid:30218796	2584	83527	144	144	19	19	30.4	5.17	617052	1	0	0	963.478	2887.41	3	2887.41	0.0038	0	31.85	20	34	0.0036	K	EQVFSTYSDNQPGVLIQVYEGER	A	Deamidated (NQ)	0.00000000001000000000000.0			File4261 Spectrum569091 scans: 36844	126/130C	---	127c/130C	---	128c/130C	---	129c/130C	---	131/130C	---	127n/130C	---	128n/130C	---	129n/130C	---
1	3	Pavir.J02847.1.p|PACid:30218796	Pavir.J02847.1.p|PACid:30218796	2584	83527	144	144	19	19	30.4	5.17	661647	1	0	0	811.928	3243.68	4	3243.68	0.0006	1	45.04	21	35	0.00021	K	KEQVFSTYSDNQPGVLIQVYEGER	A					File4260 Spectrum520976 scans: 32564	126/130C	---	127c/130C	---	128c/130C	---	129c/130C	---	131/130C	---	127n/130C	---	128n/130C	---	129n/130C	---
1	3	Pavir.J02847.1.p|PACid:30218796	Pavir.J02847.1.p|PACid:30218796	2584	83527	144	144	19	19	30.4	5.17	661650	1	0	0	811.928	3243.68	4	3243.68	0.0023	1	41.33	19	35	0.00037	K	KEQVFSTYSDNQPGVLIQVYEGER	A					File4260 Spectrum520934 scans: 32518	126/130C	---	127c/130C	---	128c/130C	---	129c/130C	---	131/130C	---	127n/130C	---	128n/130C	---	129n/130C	---
1	3	Pavir.J02847.1.p|PACid:30218796	Pavir.J02847.1.p|PACid:30218796	2584	83527	144	144	19	19	30.4	5.17	661720	1	0	0	812.179	3244.69	4	3244.67	0.0205	1	34.35	20	35	0.0021	K	KEQVFSTYSDNQPGVLIQVYEGER	A	Deamidated (NQ)	0.000000000000000001000000.0			File4261 Spectrum565700 scans: 33100	126/130C	---	127c/130C	---	128c/130C	---	129c/130C	---	131/130C	---	127n/130C	---	128n/130C	---	129n/130C	---
1	4	Pavir.Ib03660.1.p|PACid:30238462	Pavir.Ib03660.1.p|PACid:30238462	1951	84420	104	104	25	25	46.6	5.71	59373	1	0	0	594.333	1186.65	2	1186.65	0.0016	0	36.76	29	30	0.0099	K	VIENAEGAR	T					File4248 Spectrum6576 scans: 9080	126/130C	---	127c/130C	---	128c/130C	---	129c/130C	---	131/130C	---	127n/130C	---	128n/130C	---	129n/130C	---
1	4	Pavir.Ib03660.1.p|PACid:30238462	Pavir.Ib03660.1.p|PACid:30238462	1951	84420	104	104	25	25	46.6	5.71	59377	1	0	0	594.334	1186.65	2	1186.65	0.0033	0	42.83	27	30	0.0015	K	VIENAEGAR	T					File4248 Spectrum7307 scans: 9905	126/130C	---	127c/130C	---	128c/130C	---	129c/130C	---	131/130C	---	127n/130C	---	128n/130C	---	129n/130C	---
1	4	Pavir.Ib03660.1.p|PACid:30238462	Pavir.Ib03660.1.p|PACid:30238462	1951	84420	104	104	25	25	46.6	5.71	59551	1	0	0	594.826	1187.64	2	1187.63	0.0018	0	47.57	30	31	0.001	K	VIENAEGAR	T	Deamidated (NQ)	0.000100000.0			File4252 Spectrum181174 scans: 11716	126/130C	---	127c/130C	---	128c/130C	---	129c/130C	---	131/130C	---	127n/130C	---	128n/130C	---	129n/130C	---
1	4	Pavir.Ib03660.1.p|PACid:30238462	Pavir.Ib03660.1.p|PACid:30238462	1951	84420	104	104	25	25	46.6	5.71	61326	1	0	0	598.87	1195.73	2	1195.72	0.0015	0	33.28	24	28	0.0065	K	HLNITLTR	S					File4262 Spectrum593014 scans: 14342	126/130C	---	127c/130C	---	128c/130C	---	129c/130C	---	131/130C	---	127n/130C	---	128n/130C	---	129n/130C	---
1	4	Pavir.Ib03660.1.p|PACid:30238462	Pavir.Ib03660.1.p|PACid:30238462	1951	84420	104	104	25	25	46.6	5.71	215203	1	0	0	795.514	1589.01	2	1589.01	0.0015	1	21.86	14	28	0.0089	R	NTTIPTKK	S					File4254 Spectrum265144 scans: 9995	126/130C	---	127c/130C	---	128c/130C	---	129c/130C	---	131/130C	---	127n/130C	---	128n/130C	---	129n/130C	---
1	4	Pavir.Ib03660.1.p|PACid:30238462	Pavir.Ib03660.1.p|PACid:30238462	1951	84420	104	104	25	25	46.6	5.71	215225	1	0	0	795.514	1589.01	2	1589.01	0.0016	1	24.66	14	28	0.0049	R	NTTIPTKK	S					File4254 Spectrum265392 scans: 10269	126/130C	---	127c/130C	---	128c/130C	---	129c/130C	---	131/130C	---	127n/130C	---	128n/130C	---	129n/130C	---
1	4	Pavir.Ib03660.1.p|PACid:30238462	Pavir.Ib03660.1.p|PACid:30238462	1951	84420	104	104	25	25	46.6	5.71	215235	1	0	0	795.514	1589.01	2	1589.01	0.0017	1	24.75	14	28	0.0048	R	NTTIPTKK	S					File4253 Spectrum222379 scans: 10139	126/130C	---	127c/130C	---	128c/130C	---	129c/130C	---	131/130C	---	127n/130C	---	128n/130C	---	129n/130C	---
1	4	Pavir.Ib03660.1.p|PACid:30238462	Pavir.Ib03660.1.p|PACid:30238462	1951	84420	104	104	25	25	46.6	5.71	215711	1	0	0	796.014	1590.01	2	1590	0.0184	1	23.25	15	30	0.0075	R	NTTIPTKK	S	Deamidated (NQ)	0.10000000.0			File4254 Spectrum265638 scans: 10541	126/130C	---	127c/130C	---	128c/130C	---	129c/130C	---	131/130C	---	127n/130C	---	128n/130C	---	129n/130C	---
1	4	Pavir.Ib03660.1.p|PACid:30238462	Pavir.Ib03660.1.p|PACid:30238462	1951	84420	104	104	25	25	46.6	5.71	216442	1	0	0	796.944	1591.87	2	1591.87	0.002	1	45.05		33	0.0035	R	RFDDPQTQK	E					File4252 Spectrum178709 scans: 8988	126/130C	---	127c/130C	---	128c/130C	---	129c/130C	---	131/130C	---	127n/130C	---	128n/130C	---	129n/130C	---
1	4	Pavir.Ib03660.1.p|PACid:30238462	Pavir.Ib03660.1.p|PACid:30238462	1951	84420	104	104	25	25	46.6	5.71	236545	1	0	1	818.988	1635.96	2	1635.96	0.0005	0	52.25	18	32	2.2e-05	R	TTPSVVAFTQK	G					File4250 Spectrum103950 scans: 22184	126/130C	1.092	127c/130C	0.903	128c/130C	1.038	129c/130C	0.998	131/130C	0.951	127n/130C	0.953	128n/130C	0.877	129n/130C	1.145
1	4	Pavir.Ib03660.1.p|PACid:30238462	Pavir.Ib03660.1.p|PACid:30238462	1951	84420	104	104	25	25	46.6	5.71	236561	1	0	1	818.988	1635.96	2	1635.96	0.0015	0	26.89	14	32	0.003	R	TTPSVVAFTQK	G					File4250 Spectrum104100 scans: 22347	126/130C	0.957	127c/130C	1.107	128c/130C	1.046	129c/130C	1.197	131/130C	1.196	127n/130C	1.04	128n/130C	0.914	129n/130C	1.217
1	4	Pavir.Ib03660.1.p|PACid:30238462	Pavir.Ib03660.1.p|PACid:30238462	1951	84420	104	104	25	25	46.6	5.71	236569	1	0	1	818.988	1635.96	2	1635.96	0.0018	0	47.02	15	32	3.9e-05	R	TTPSVVAFTQK	G					File4251 Spectrum147982 scans: 22263	126/130C	0.998	127c/130C	0.801	128c/130C	1.075	129c/130C	1.061	131/130C	0.956	127n/130C	0.782	128n/130C	0.944	129n/130C	0.957
1	4	Pavir.Ib03660.1.p|PACid:30238462	Pavir.Ib03660.1.p|PACid:30238462	1951	84420	104	104	25	25	46.6	5.71	236570	1	0	1	818.988	1635.96	2	1635.96	0.002	0	49.23	20	32	6.5e-05	R	TTPSVVAFTQK	G					File4250 Spectrum104196 scans: 22452	126/130C	1.021	127c/130C	0.911	128c/130C	1.162	129c/130C	1.258	131/130C	0.906	127n/130C	0.992	128n/130C	0.96	129n/130C	1.182
1	4	Pavir.Ib03660.1.p|PACid:30238462	Pavir.Ib03660.1.p|PACid:30238462	1951	84420	104	104	25	25	46.6	5.71	242588	1	0	1	825.461	1648.91	2	1648.9	0.003	0	63.48	26	33	9.2e-06	R	SSGGLSEADIQK	M					File4262 Spectrum594644 scans: 16120	126/130C	0.819	127c/130C	0.981	128c/130C	0.911	129c/130C	1.282	131/130C	1.065	127n/130C	1.001	128n/130C	0.759	129n/130C	0.944
1	4	Pavir.Ib03660.1.p|PACid:30238462	Pavir.Ib03660.1.p|PACid:30238462	1951	84420	104	104	25	25	46.6	5.71	247899	1	0	1	831.951	1661.89	2	1661.89	0.0009	0	44.06	21	33	0.00027	K	EVDEVLLVGGMTR	V	Oxidation (M)	0.0000000000300.0			File4260 Spectrum514144 scans: 25094	126/130C	1.065	127c/130C	1.025	128c/130C	0.995	129c/130C	0.927	131/130C	1.138	127n/130C	0.959	128n/130C	0.948	129n/130C	1.477
1	4	Pavir.Ib03660.1.p|PACid:30238462	Pavir.Ib03660.1.p|PACid:30238462	1951	84420	104	104	25	25	46.6	5.71	247902	1	0	1	554.97	1661.89	3	1661.89	0.0012	0	33.98	23	33	0.0046	K	EVDEVLLVGGMTR	V	Oxidation (M)	0.0000000000300.0			File4264 Spectrum690379 scans: 24976	126/130C	1.064	127c/130C	0.954	128c/130C	0.82	129c/130C	1.03	131/130C	1.367	127n/130C	1.195	128n/130C	1.039	129n/130C	1.075
1	4	Pavir.Ib03660.1.p|PACid:30238462	Pavir.Ib03660.1.p|PACid:30238462	1951	84420	104	104	25	25	46.6	5.71	247904	1	0	1	831.951	1661.89	2	1661.89	0.0017	0	56.86	25	32	3.9e-05	K	EVDEVLLVGGMTR	V	Oxidation (M)	0.0000000000300.0			File4263 Spectrum647001 scans: 25195	126/130C	1.101	127c/130C	1.342	128c/130C	1.443	129c/130C	1.269	131/130C	1.407	127n/130C	1.069	128n/130C	1.063	129n/130C	1.473
1	4	Pavir.Ib03660.1.p|PACid:30238462	Pavir.Ib03660.1.p|PACid:30238462	1951	84420	104	104	25	25	46.6	5.71	247905	1	0	1	831.951	1661.89	2	1661.89	0.0018	0	49.49	19	32	5e-05	K	EVDEVLLVGGMTR	V	Oxidation (M)	0.0000000000300.0			File4264 Spectrum690370 scans: 24966	126/130C	0.859	127c/130C	1.029	128c/130C	1.014	129c/130C	0.862	131/130C	0.954	127n/130C	0.777	128n/130C	0.87	129n/130C	0.955
1	4	Pavir.Ib03660.1.p|PACid:30238462	Pavir.Ib03660.1.p|PACid:30238462	1951	84420	104	104	25	25	46.6	5.71	247906	1	0	1	831.951	1661.89	2	1661.89	0.0019	0	26.83	16	33	0.0051	K	EVDEVLLVGGMTR	V	Oxidation (M)	0.0000000000300.0			File4259 Spectrum471185 scans: 25203	126/130C	1.553	127c/130C	1.032	128c/130C	1.32	129c/130C	1.576	131/130C	1.11	127n/130C	1.27	128n/130C	1.485	129n/130C	1.181
1	4	Pavir.Ib03660.1.p|PACid:30238462	Pavir.Ib03660.1.p|PACid:30238462	1951	84420	104	104	25	25	46.6	5.71	247908	1	0	1	831.952	1661.89	2	1661.89	0.0024	0	37.7	18	32	0.00054	K	EVDEVLLVGGMTR	V	Oxidation (M)	0.0000000000300.0			File4263 Spectrum646764 scans: 24935	126/130C	0.903	127c/130C	1.11	128c/130C	1.023	129c/130C	0.765	131/130C	1.071	127n/130C	0.797	128n/130C	0.773	129n/130C	0.942
1	4	Pavir.Ib03660.1.p|PACid:30238462	Pavir.Ib03660.1.p|PACid:30238462	1951	84420	104	104	25	25	46.6	5.71	287000	1	0	0	581.327	1740.96	3	1740.96	0.0004	0	42.75	20	33	0.00031	K	MVQEAELHAQK	D					File4251 Spectrum141502 scans: 15193	126/130C	---	127c/130C	---	128c/130C	---	129c/130C	---	131/130C	---	127n/130C	---	128n/130C	---	129n/130C	---
1	4	Pavir.Ib03660.1.p|PACid:30238462	Pavir.Ib03660.1.p|PACid:30238462	1951	84420	104	104	25	25	46.6	5.71	287003	1	0	0	871.488	1740.96	2	1740.96	0.0016	0	59.58	21	33	7.4e-06	K	MVQEAELHAQK	D					File4251 Spectrum141548 scans: 15244	126/130C	---	127c/130C	---	128c/130C	---	129c/130C	---	131/130C	---	127n/130C	---	128n/130C	---	129n/130C	---
1	4	Pavir.Ib03660.1.p|PACid:30238462	Pavir.Ib03660.1.p|PACid:30238462	1951	84420	104	104	25	25	46.6	5.71	294326	1	0	0	586.659	1756.96	3	1756.95	0.0013	0	35.35	17	33	0.00076	K	MVQEAELHAQK	D	Oxidation (M)	0.30000000000.0			File4261 Spectrum545705 scans: 11307	126/130C	---	127c/130C	---	128c/130C	---	129c/130C	---	131/130C	---	127n/130C	---	128n/130C	---	129n/130C	---
1	4	Pavir.Ib03660.1.p|PACid:30238462	Pavir.Ib03660.1.p|PACid:30238462	1951	84420	104	104	25	25	46.6	5.71	294328	1	0	0	879.486	1756.96	2	1756.95	0.002	0	24.71	15	33	0.0058	K	MVQEAELHAQK	D	Oxidation (M)	0.30000000000.0			File4251 Spectrum137439 scans: 10716	126/130C	---	127c/130C	---	128c/130C	---	129c/130C	---	131/130C	---	127n/130C	---	128n/130C	---	129n/130C	---
1	4	Pavir.Ib03660.1.p|PACid:30238462	Pavir.Ib03660.1.p|PACid:30238462	1951	84420	104	104	25	25	46.6	5.71	294329	1	0	0	879.486	1756.96	2	1756.95	0.0022	0	38.42	24	33	0.0018	K	MVQEAELHAQK	D	Oxidation (M)	0.30000000000.0			File4261 Spectrum545793 scans: 11403	126/130C	---	127c/130C	---	128c/130C	---	129c/130C	---	131/130C	---	127n/130C	---	128n/130C	---	129n/130C	---
1	4	Pavir.Ib03660.1.p|PACid:30238462	Pavir.Ib03660.1.p|PACid:30238462	1951	84420	104	104	25	25	46.6	5.71	309567	1	0	0	598.663	1792.97	3	1792.97	0.0003	0	27.05	16	33	0.0046	K	AVITVPAYFNDAQR	Q					File4264 Spectrum693944 scans: 28852	126/130C	---	127c/130C	---	128c/130C	---	129c/130C	---	131/130C	---	127n/130C	---	128n/130C	---	129n/130C	---
1	4	Pavir.Ib03660.1.p|PACid:30238462	Pavir.Ib03660.1.p|PACid:30238462	1951	84420	104	104	25	25	46.6	5.71	309576	1	0	0	598.663	1792.97	3	1792.97	0.0009	0	32.42	21	33	0.004	K	AVITVPAYFNDAQR	Q					File4264 Spectrum693689 scans: 28575	126/130C	---	127c/130C	---	128c/130C	---	129c/130C	---	131/130C	---	127n/130C	---	128n/130C	---	129n/130C	---
1	4	Pavir.Ib03660.1.p|PACid:30238462	Pavir.Ib03660.1.p|PACid:30238462	1951	84420	104	104	25	25	46.6	5.71	309579	1	0	0	897.491	1792.97	2	1792.97	0.001	0	59.46		33	0.00014	K	AVITVPAYFNDAQR	Q					File4263 Spectrum649777 scans: 28241	126/130C	---	127c/130C	---	128c/130C	---	129c/130C	---	131/130C	---	127n/130C	---	128n/130C	---	129n/130C	---
1	4	Pavir.Ib03660.1.p|PACid:30238462	Pavir.Ib03660.1.p|PACid:30238462	1951	84420	104	104	25	25	46.6	5.71	309582	1	0	0	598.663	1792.97	3	1792.97	0.0012	0	34.36	17	33	0.0011	K	AVITVPAYFNDAQR	Q					File4264 Spectrum693437 scans: 28301	126/130C	---	127c/130C	---	128c/130C	---	129c/130C	---	131/130C	---	127n/130C	---	128n/130C	---	129n/130C	---
1	4	Pavir.Ib03660.1.p|PACid:30238462	Pavir.Ib03660.1.p|PACid:30238462	1951	84420	104	104	25	25	46.6	5.71	309583	1	0	0	598.663	1792.97	3	1792.97	0.0012	0	32.26	17	33	0.0017	K	AVITVPAYFNDAQR	Q					File4263 Spectrum649543 scans: 27985	126/130C	---	127c/130C	---	128c/130C	---	129c/130C	---	131/130C	---	127n/130C	---	128n/130C	---	129n/130C	---
1	4	Pavir.Ib03660.1.p|PACid:30238462	Pavir.Ib03660.1.p|PACid:30238462	1951	84420	104	104	25	25	46.6	5.71	309585	1	0	0	897.492	1792.97	2	1792.97	0.0013	0	68.86		33	1.6e-05	K	AVITVPAYFNDAQR	Q					File4263 Spectrum650021 scans: 28510	126/130C	---	127c/130C	---	128c/130C	---	129c/130C	---	131/130C	---	127n/130C	---	128n/130C	---	129n/130C	---
1	4	Pavir.Ib03660.1.p|PACid:30238462	Pavir.Ib03660.1.p|PACid:30238462	1951	84420	104	104	25	25	46.6	5.71	309586	1	0	0	598.664	1792.97	3	1792.97	0.0014	0	28.36	17	33	0.0039	K	AVITVPAYFNDAQR	Q					File4249 Spectrum65245 scans: 28162	126/130C	---	127c/130C	---	128c/130C	---	129c/130C	---	131/130C	---	127n/130C	---	128n/130C	---	129n/130C	---
1	4	Pavir.Ib03660.1.p|PACid:30238462	Pavir.Ib03660.1.p|PACid:30238462	1951	84420	104	104	25	25	46.6	5.71	309587	1	0	0	598.664	1792.97	3	1792.97	0.0014	0	32.76	17	33	0.0016	K	AVITVPAYFNDAQR	Q					File4264 Spectrum693183 scans: 28025	126/130C	---	127c/130C	---	128c/130C	---	129c/130C	---	131/130C	---	127n/130C	---	128n/130C	---	129n/130C	---
1	4	Pavir.Ib03660.1.p|PACid:30238462	Pavir.Ib03660.1.p|PACid:30238462	1951	84420	104	104	25	25	46.6	5.71	309592	1	0	0	598.664	1792.97	3	1792.97	0.0016	0	28.14	20	33	0.0081	K	AVITVPAYFNDAQR	Q					File4263 Spectrum650032 scans: 28522	126/130C	---	127c/130C	---	128c/130C	---	129c/130C	---	131/130C	---	127n/130C	---	128n/130C	---	129n/130C	---
1	4	Pavir.Ib03660.1.p|PACid:30238462	Pavir.Ib03660.1.p|PACid:30238462	1951	84420	104	104	25	25	46.6	5.71	309595	1	0	0	897.492	1792.97	2	1792.97	0.002	0	64.66	33	33	3.7e-05	K	AVITVPAYFNDAQR	Q					File4264 Spectrum693405 scans: 28266	126/130C	---	127c/130C	---	128c/130C	---	129c/130C	---	131/130C	---	127n/130C	---	128n/130C	---	129n/130C	---
1	4	Pavir.Ib03660.1.p|PACid:30238462	Pavir.Ib03660.1.p|PACid:30238462	1951	84420	104	104	25	25	46.6	5.71	309599	1	0	0	598.664	1792.97	3	1792.97	0.0022	0	42.29	19	33	0.00025	K	AVITVPAYFNDAQR	Q					File4263 Spectrum649788 scans: 28253	126/130C	---	127c/130C	---	128c/130C	---	129c/130C	---	131/130C	---	127n/130C	---	128n/130C	---	129n/130C	---
1	4	Pavir.Ib03660.1.p|PACid:30238462	Pavir.Ib03660.1.p|PACid:30238462	1951	84420	104	104	25	25	46.6	5.71	310220	1	0	0	598.991	1793.95	3	1793.95	-0.0013	0	23.14	16	33	0.0097	K	AVITVPAYFNDAQR	Q	Deamidated (NQ)	0.00000000010000.0			File4264 Spectrum694165 scans: 29093	126/130C	---	127c/130C	---	128c/130C	---	129c/130C	---	131/130C	---	127n/130C	---	128n/130C	---	129n/130C	---
1	4	Pavir.Ib03660.1.p|PACid:30238462	Pavir.Ib03660.1.p|PACid:30238462	1951	84420	104	104	25	25	46.6	5.71	310223	1	0	0	598.991	1793.95	3	1793.95	0.0009	0	21.92	14	33	0.0088	K	AVITVPAYFNDAQR	Q	Deamidated (NQ)	0.00000000010000.0			File4260 Spectrum517699 scans: 28971	126/130C	---	127c/130C	---	128c/130C	---	129c/130C	---	131/130C	---	127n/130C	---	128n/130C	---	129n/130C	---
1	4	Pavir.Ib03660.1.p|PACid:30238462	Pavir.Ib03660.1.p|PACid:30238462	1951	84420	104	104	25	25	46.6	5.71	310226	1	0	0	598.992	1793.95	3	1793.95	0.002	0	31.11	18	33	0.0026	K	AVITVPAYFNDAQR	Q	Deamidated (NQ)	0.00000000000010.0			File4259 Spectrum475253 scans: 29719	126/130C	---	127c/130C	---	128c/130C	---	129c/130C	---	131/130C	---	127n/130C	---	128n/130C	---	129n/130C	---
1	4	Pavir.Ib03660.1.p|PACid:30238462	Pavir.Ib03660.1.p|PACid:30238462	1951	84420	104	104	25	25	46.6	5.71	310230	1	0	0	897.984	1793.95	2	1793.95	0.0021	0	79.36	26	33	2.5e-07	K	AVITVPAYFNDAQR	Q	Deamidated (NQ)	0.00000000010000.0			File4259 Spectrum474780 scans: 29187	126/130C	---	127c/130C	---	128c/130C	---	129c/130C	---	131/130C	---	127n/130C	---	128n/130C	---	129n/130C	---
1	4	Pavir.Ib03660.1.p|PACid:30238462	Pavir.Ib03660.1.p|PACid:30238462	1951	84420	104	104	25	25	46.6	5.71	310231	1	0	0	598.992	1793.95	3	1793.95	0.0025	0	29.26	14	33	0.0018	K	AVITVPAYFNDAQR	Q	Deamidated (NQ)	0.00000000010000.0			File4259 Spectrum474804 scans: 29214	126/130C	---	127c/130C	---	128c/130C	---	129c/130C	---	131/130C	---	127n/130C	---	128n/130C	---	129n/130C	---
1	4	Pavir.Ib03660.1.p|PACid:30238462	Pavir.Ib03660.1.p|PACid:30238462	1951	84420	104	104	25	25	46.6	5.71	310232	1	0	0	897.984	1793.95	2	1793.95	0.0026	0	57.52	25	33	3e-05	K	AVITVPAYFNDAQR	Q	Deamidated (NQ)	0.00000000010000.0			File4259 Spectrum475227 scans: 29690	126/130C	---	127c/130C	---	128c/130C	---	129c/130C	---	131/130C	---	127n/130C	---	128n/130C	---	129n/130C	---
1	4	Pavir.Ib03660.1.p|PACid:30238462	Pavir.Ib03660.1.p|PACid:30238462	1951	84420	104	104	25	25	46.6	5.71	310238	1	0	0	598.993	1793.96	3	1793.95	0.0051	0	29.99	16	33	0.0021	K	AVITVPAYFNDAQR	Q	Deamidated (NQ)	0.00000000010000.0			File4259 Spectrum475030 scans: 29468	126/130C	---	127c/130C	---	128c/130C	---	129c/130C	---	131/130C	---	127n/130C	---	128n/130C	---	129n/130C	---
1	4	Pavir.Ib03660.1.p|PACid:30238462	Pavir.Ib03660.1.p|PACid:30238462	1951	84420	104	104	25	25	46.6	5.71	322631	1	0	0	912.035	1822.06	2	1822.06	0.0006	0	41.86	15	32	0.00012	K	LLGEFDLVGIPPAPR	G					File4250 Spectrum120368 scans: 40219	126/130C	---	127c/130C	---	128c/130C	---	129c/130C	---	131/130C	---	127n/130C	---	128n/130C	---	129n/130C	---
1	4	Pavir.Ib03660.1.p|PACid:30238462	Pavir.Ib03660.1.p|PACid:30238462	1951	84420	104	104	25	25	46.6	5.71	322635	1	0	0	608.36	1822.06	3	1822.06	0.0013	0	38.93	21	32	0.001	K	LLGEFDLVGIPPAPR	G					File4250 Spectrum120501 scans: 40370	126/130C	---	127c/130C	---	128c/130C	---	129c/130C	---	131/130C	---	127n/130C	---	128n/130C	---	129n/130C	---
1	4	Pavir.Ib03660.1.p|PACid:30238462	Pavir.Ib03660.1.p|PACid:30238462	1951	84420	104	104	25	25	46.6	5.71	322636	1	0	0	608.36	1822.06	3	1822.06	0.0015	0	32.33	15	32	0.00093	K	LLGEFDLVGIPPAPR	G					File4250 Spectrum121271 scans: 41244	126/130C	---	127c/130C	---	128c/130C	---	129c/130C	---	131/130C	---	127n/130C	---	128n/130C	---	129n/130C	---
1	4	Pavir.Ib03660.1.p|PACid:30238462	Pavir.Ib03660.1.p|PACid:30238462	1951	84420	104	104	25	25	46.6	5.71	322639	1	0	0	912.036	1822.06	2	1822.06	0.0016	0	36.18	15	32	0.0004	K	LLGEFDLVGIPPAPR	G					File4250 Spectrum120143 scans: 39965	126/130C	---	127c/130C	---	128c/130C	---	129c/130C	---	131/130C	---	127n/130C	---	128n/130C	---	129n/130C	---
1	4	Pavir.Ib03660.1.p|PACid:30238462	Pavir.Ib03660.1.p|PACid:30238462	1951	84420	104	104	25	25	46.6	5.71	322640	1	0	0	608.36	1822.06	3	1822.06	0.0017	0	37.67	23	32	0.0021	K	LLGEFDLVGIPPAPR	G					File4250 Spectrum120722 scans: 40620	126/130C	---	127c/130C	---	128c/130C	---	129c/130C	---	131/130C	---	127n/130C	---	128n/130C	---	129n/130C	---
1	4	Pavir.Ib03660.1.p|PACid:30238462	Pavir.Ib03660.1.p|PACid:30238462	1951	84420	104	104	25	25	46.6	5.71	322641	1	0	0	608.36	1822.06	3	1822.06	0.0017	0	27.58	19	32	0.0073	K	LLGEFDLVGIPPAPR	G					File4249 Spectrum76003 scans: 39999	126/130C	---	127c/130C	---	128c/130C	---	129c/130C	---	131/130C	---	127n/130C	---	128n/130C	---	129n/130C	---
1	4	Pavir.Ib03660.1.p|PACid:30238462	Pavir.Ib03660.1.p|PACid:30238462	1951	84420	104	104	25	25	46.6	5.71	322643	1	0	0	912.036	1822.06	2	1822.06	0.0017	0	38.64	20	32	0.0008	K	LLGEFDLVGIPPAPR	G					File4250 Spectrum120608 scans: 40491	126/130C	---	127c/130C	---	128c/130C	---	129c/130C	---	131/130C	---	127n/130C	---	128n/130C	---	129n/130C	---
1	4	Pavir.Ib03660.1.p|PACid:30238462	Pavir.Ib03660.1.p|PACid:30238462	1951	84420	104	104	25	25	46.6	5.71	377175	1	0	0	654.04	1959.1	3	1959.1	0.002	1	25.44	14	33	0.0041	K	MKETAESYLGK	S	Oxidation (M)	0.30000000000.0			File4260 Spectrum507139 scans: 17482	126/130C	---	127c/130C	---	128c/130C	---	129c/130C	---	131/130C	---	127n/130C	---	128n/130C	---	129n/130C	---
1	4	Pavir.Ib03660.1.p|PACid:30238462	Pavir.Ib03660.1.p|PACid:30238462	1951	84420	104	104	25	25	46.6	5.71	377176	1	0	0	654.04	1959.1	3	1959.1	0.0024	1	26.85	14	33	0.003	K	MKETAESYLGK	S	Oxidation (M)	0.30000000000.0			File4250 Spectrum99653 scans: 17517	126/130C	---	127c/130C	---	128c/130C	---	129c/130C	---	131/130C	---	127n/130C	---	128n/130C	---	129n/130C	---
1	4	Pavir.Ib03660.1.p|PACid:30238462	Pavir.Ib03660.1.p|PACid:30238462	1951	84420	104	104	25	25	46.6	5.71	387220	1	0	0	661.716	1982.13	3	1982.12	0.0014	0	27.48	16	33	0.0041	K	QYSPSQVGAFVLTK	M					File4252 Spectrum198019 scans: 30257	126/130C	---	127c/130C	---	128c/130C	---	129c/130C	---	131/130C	---	127n/130C	---	128n/130C	---	129n/130C	---
1	4	Pavir.Ib03660.1.p|PACid:30238462	Pavir.Ib03660.1.p|PACid:30238462	1951	84420	104	104	25	25	46.6	5.71	387222	1	0	0	661.716	1982.13	3	1982.12	0.0025	0	30.39	19	33	0.0042	K	QYSPSQVGAFVLTK	M					File4252 Spectrum198254 scans: 30519	126/130C	---	127c/130C	---	128c/130C	---	129c/130C	---	131/130C	---	127n/130C	---	128n/130C	---	129n/130C	---
1	4	Pavir.Ib03660.1.p|PACid:30238462	Pavir.Ib03660.1.p|PACid:30238462	1951	84420	104	104	25	25	46.6	5.71	392423	1	0	1	666.377	1996.11	3	1996.1	0.0045	0	31.28	22	33	0.0063	K	IPAEVASEIEAAIADLR	Q					File4258 Spectrum445215 scans: 44995	126/130C	0.728	127c/130C	1.082	128c/130C	1.062	129c/130C	0.813	131/130C	0.842	127n/130C	1.013	128n/130C	0.903	129n/130C	1.158
1	4	Pavir.Ib03660.1.p|PACid:30238462	Pavir.Ib03660.1.p|PACid:30238462	1951	84420	104	104	25	25	46.6	5.71	397421	1	0	0	1006.05	2010.09	2	2010.09	0	0	30.26	19	34	0.0043	R	QAVTNPQNTFFGTK	R					File4249 Spectrum60621 scans: 23123	126/130C	---	127c/130C	---	128c/130C	---	129c/130C	---	131/130C	---	127n/130C	---	128n/130C	---	129n/130C	---
1	4	Pavir.Ib03660.1.p|PACid:30238462	Pavir.Ib03660.1.p|PACid:30238462	1951	84420	104	104	25	25	46.6	5.71	397423	1	0	0	671.039	2010.1	3	2010.09	0.0028	0	26.12	17	34	0.0061	R	QAVTNPQNTFFGTK	R					File4249 Spectrum60876 scans: 23400	126/130C	---	127c/130C	---	128c/130C	---	129c/130C	---	131/130C	---	127n/130C	---	128n/130C	---	129n/130C	---
1	4	Pavir.Ib03660.1.p|PACid:30238462	Pavir.Ib03660.1.p|PACid:30238462	1951	84420	104	104	25	25	46.6	5.71	397757	1	0	0	671.367	2011.08	3	2011.08	0.0022	0	32.11	15	33	0.00097	R	QAVTNPQNTFFGTK	R	Deamidated (NQ)	0.00000001000000.0			File4259 Spectrum469289 scans: 23114	126/130C	---	127c/130C	---	128c/130C	---	129c/130C	---	131/130C	---	127n/130C	---	128n/130C	---	129n/130C	---
1	4	Pavir.Ib03660.1.p|PACid:30238462	Pavir.Ib03660.1.p|PACid:30238462	1951	84420	104	104	25	25	46.6	5.71	401774	1	0	1	1012.02	2022.03	2	2022.03	0.0009	0	24.94	17	33	0.0097	K	SQAFSTAADNQTQVGIR	V					File4263 Spectrum639478 scans: 17006	126/130C	0.919	127c/130C	1.748	128c/130C	1.233	129c/130C	1.37	131/130C	1.272	127n/130C	1.039	128n/130C	1.392	129n/130C	1.4
1	4	Pavir.Ib03660.1.p|PACid:30238462	Pavir.Ib03660.1.p|PACid:30238462	1951	84420	104	104	25	25	46.6	5.71	449286	1	0	0	723.073	2166.2	3	2166.2	0.0007	1	24.8	14	34	0.0047	R	QAVTNPQNTFFGTKR	L					File4253 Spectrum230114 scans: 18668	126/130C	---	127c/130C	---	128c/130C	---	129c/130C	---	131/130C	---	127n/130C	---	128n/130C	---	129n/130C	---
1	4	Pavir.Ib03660.1.p|PACid:30238462	Pavir.Ib03660.1.p|PACid:30238462	1951	84420	104	104	25	25	46.6	5.71	449304	1	0	0	723.074	2166.2	3	2166.2	0.0039	1	32.66	23	34	0.0061	K	RQAVTNPQNTFFGTK	R					File4249 Spectrum56403 scans: 18493	126/130C	---	127c/130C	---	128c/130C	---	129c/130C	---	131/130C	---	127n/130C	---	128n/130C	---	129n/130C	---
1	4	Pavir.Ib03660.1.p|PACid:30238462	Pavir.Ib03660.1.p|PACid:30238462	1951	84420	104	104	25	25	46.6	5.71	449549	1	0	0	723.398	2167.17	3	2167.16	0.0093	0	24.49	16	34	0.0078	K	GVNPDEAVAMGAAIQGGILR	G					File4255 Spectrum330773 scans: 34755	126/130C	---	127c/130C	---	128c/130C	---	129c/130C	---	131/130C	---	127n/130C	---	128n/130C	---	129n/130C	---
1	4	Pavir.Ib03660.1.p|PACid:30238462	Pavir.Ib03660.1.p|PACid:30238462	1951	84420	104	104	25	25	46.6	5.71	455056	1	0	0	728.727	2183.16	3	2183.16	0.0011	0	23.24	15	34	0.0085	K	GVNPDEAVAMGAAIQGGILR	G	Oxidation (M)	0.00000000030000000000.0			File4249 Spectrum64859 scans: 27742	126/130C	---	127c/130C	---	128c/130C	---	129c/130C	---	131/130C	---	127n/130C	---	128n/130C	---	129n/130C	---
1	4	Pavir.Ib03660.1.p|PACid:30238462	Pavir.Ib03660.1.p|PACid:30238462	1951	84420	104	104	25	25	46.6	5.71	455062	1	0	0	728.727	2183.16	3	2183.16	0.0015	0	54.6	23	34	3.7e-05	K	GVNPDEAVAMGAAIQGGILR	G	Oxidation (M)	0.00000000030000000000.0			File4264 Spectrum693182 scans: 28024	126/130C	---	127c/130C	---	128c/130C	---	129c/130C	---	131/130C	---	127n/130C	---	128n/130C	---	129n/130C	---
1	4	Pavir.Ib03660.1.p|PACid:30238462	Pavir.Ib03660.1.p|PACid:30238462	1951	84420	104	104	25	25	46.6	5.71	455063	1	0	0	728.727	2183.16	3	2183.16	0.0015	0	48.96	25	34	0.00022	K	GVNPDEAVAMGAAIQGGILR	G	Oxidation (M)	0.00000000030000000000.0			File4264 Spectrum692940 scans: 27760	126/130C	---	127c/130C	---	128c/130C	---	129c/130C	---	131/130C	---	127n/130C	---	128n/130C	---	129n/130C	---
1	4	Pavir.Ib03660.1.p|PACid:30238462	Pavir.Ib03660.1.p|PACid:30238462	1951	84420	104	104	25	25	46.6	5.71	455070	1	0	0	728.727	2183.16	3	2183.16	0.0024	0	47.35	25	34	0.00036	K	GVNPDEAVAMGAAIQGGILR	G	Oxidation (M)	0.00000000030000000000.0			File4248 Spectrum22678 scans: 26743	126/130C	---	127c/130C	---	128c/130C	---	129c/130C	---	131/130C	---	127n/130C	---	128n/130C	---	129n/130C	---
1	4	Pavir.Ib03660.1.p|PACid:30238462	Pavir.Ib03660.1.p|PACid:30238462	1951	84420	104	104	25	25	46.6	5.71	455072	1	0	0	1092.59	2183.16	2	2183.16	0.0029	0	31.58	18	34	0.0025	K	GVNPDEAVAMGAAIQGGILR	G	Oxidation (M)	0.00000000030000000000.0			File4264 Spectrum693193 scans: 28036	126/130C	---	127c/130C	---	128c/130C	---	129c/130C	---	131/130C	---	127n/130C	---	128n/130C	---	129n/130C	---
1	4	Pavir.Ib03660.1.p|PACid:30238462	Pavir.Ib03660.1.p|PACid:30238462	1951	84420	104	104	25	25	46.6	5.71	455076	1	0	0	1092.59	2183.16	2	2183.16	0.0034	0	48.48	22	34	0.00013	K	GVNPDEAVAMGAAIQGGILR	G	Oxidation (M)	0.00000000030000000000.0			File4248 Spectrum23038 scans: 27139	126/130C	---	127c/130C	---	128c/130C	---	129c/130C	---	131/130C	---	127n/130C	---	128n/130C	---	129n/130C	---
1	4	Pavir.Ib03660.1.p|PACid:30238462	Pavir.Ib03660.1.p|PACid:30238462	1951	84420	104	104	25	25	46.6	5.71	479745	1	0	0	756.082	2265.22	3	2265.21	0.0168	0	25.51	18	34	0.0089	R	IINEPTAAALSYGMNNK	E	Deamidated (NQ)	0.00000000000000100.0			File4250 Spectrum111513 scans: 30415	126/130C	---	127c/130C	---	128c/130C	---	129c/130C	---	131/130C	---	127n/130C	---	128n/130C	---	129n/130C	---
1	4	Pavir.Ib03660.1.p|PACid:30238462	Pavir.Ib03660.1.p|PACid:30238462	1951	84420	104	104	25	25	46.6	5.71	480744	1	0	0	757.404	2269.19	3	2269.19	0.0028	1	34.38	15	34	0.00068	K	MVQEAELHAQKDQER	K					File4263 Spectrum636462 scans: 13685	126/130C	---	127c/130C	---	128c/130C	---	129c/130C	---	131/130C	---	127n/130C	---	128n/130C	---	129n/130C	---
1	4	Pavir.Ib03660.1.p|PACid:30238462	Pavir.Ib03660.1.p|PACid:30238462	1951	84420	104	104	25	25	46.6	5.71	480751	1	0	0	757.405	2269.19	3	2269.19	0.0042	1	47.16	23	34	0.00021	K	MVQEAELHAQKDQER	K					File4263 Spectrum636207 scans: 13409	126/130C	---	127c/130C	---	128c/130C	---	129c/130C	---	131/130C	---	127n/130C	---	128n/130C	---	129n/130C	---
1	4	Pavir.Ib03660.1.p|PACid:30238462	Pavir.Ib03660.1.p|PACid:30238462	1951	84420	104	104	25	25	46.6	5.71	483873	1	0	0	761.081	2280.22	3	2280.22	0.001	0	27.73	17	34	0.0044	R	IINEPTAAALSYGMNNK	E	Oxidation (M)	0.00000000000003000.0			File4261 Spectrum559898 scans: 26746	126/130C	---	127c/130C	---	128c/130C	---	129c/130C	---	131/130C	---	127n/130C	---	128n/130C	---	129n/130C	---
1	4	Pavir.Ib03660.1.p|PACid:30238462	Pavir.Ib03660.1.p|PACid:30238462	1951	84420	104	104	25	25	46.6	5.71	483875	1	0	0	761.081	2280.22	3	2280.22	0.0011	0	33.33	17	34	0.0012	R	IINEPTAAALSYGMNNK	E	Oxidation (M)	0.00000000000003000.0			File4261 Spectrum560389 scans: 27282	126/130C	---	127c/130C	---	128c/130C	---	129c/130C	---	131/130C	---	127n/130C	---	128n/130C	---	129n/130C	---
1	4	Pavir.Ib03660.1.p|PACid:30238462	Pavir.Ib03660.1.p|PACid:30238462	1951	84420	104	104	25	25	46.6	5.71	483878	1	0	0	761.081	2280.22	3	2280.22	0.0015	0	41.92	18	34	0.00021	R	IINEPTAAALSYGMNNK	E	Oxidation (M)	0.00000000000003000.0			File4262 Spectrum604177 scans: 26494	126/130C	---	127c/130C	---	128c/130C	---	129c/130C	---	131/130C	---	127n/130C	---	128n/130C	---	129n/130C	---
1	4	Pavir.Ib03660.1.p|PACid:30238462	Pavir.Ib03660.1.p|PACid:30238462	1951	84420	104	104	25	25	46.6	5.71	483883	1	0	0	761.081	2280.22	3	2280.22	0.002	0	37.03	17	34	0.00054	R	IINEPTAAALSYGMNNK	E	Oxidation (M)	0.00000000000003000.0			File4249 Spectrum63466 scans: 26230	126/130C	---	127c/130C	---	128c/130C	---	129c/130C	---	131/130C	---	127n/130C	---	128n/130C	---	129n/130C	---
1	4	Pavir.Ib03660.1.p|PACid:30238462	Pavir.Ib03660.1.p|PACid:30238462	1951	84420	104	104	25	25	46.6	5.71	483884	1	0	0	761.081	2280.22	3	2280.22	0.002	0	39.1	18	34	0.00045	R	IINEPTAAALSYGMNNK	E	Oxidation (M)	0.00000000000003000.0			File4261 Spectrum560139 scans: 27009	126/130C	---	127c/130C	---	128c/130C	---	129c/130C	---	131/130C	---	127n/130C	---	128n/130C	---	129n/130C	---
1	4	Pavir.Ib03660.1.p|PACid:30238462	Pavir.Ib03660.1.p|PACid:30238462	1951	84420	104	104	25	25	46.6	5.71	483885	1	0	0	761.081	2280.22	3	2280.22	0.0022	0	34.82	18	34	0.0011	R	IINEPTAAALSYGMNNK	E	Oxidation (M)	0.00000000000003000.0			File4249 Spectrum63212 scans: 25955	126/130C	---	127c/130C	---	128c/130C	---	129c/130C	---	131/130C	---	127n/130C	---	128n/130C	---	129n/130C	---
1	4	Pavir.Ib03660.1.p|PACid:30238462	Pavir.Ib03660.1.p|PACid:30238462	1951	84420	104	104	25	25	46.6	5.71	483887	1	0	0	1141.12	2280.22	2	2280.22	0.0026	0	41.45	22	34	0.00059	R	IINEPTAAALSYGMNNK	E	Oxidation (M)	0.00000000000003000.0			File4249 Spectrum63476 scans: 26240	126/130C	---	127c/130C	---	128c/130C	---	129c/130C	---	131/130C	---	127n/130C	---	128n/130C	---	129n/130C	---
1	4	Pavir.Ib03660.1.p|PACid:30238462	Pavir.Ib03660.1.p|PACid:30238462	1951	84420	104	104	25	25	46.6	5.71	483889	1	0	0	761.081	2280.22	3	2280.22	0.0026	0	27.7	19	34	0.0071	R	IINEPTAAALSYGMNNK	E	Oxidation (M)	0.00000000000003000.0			File4249 Spectrum63754 scans: 26543	126/130C	---	127c/130C	---	128c/130C	---	129c/130C	---	131/130C	---	127n/130C	---	128n/130C	---	129n/130C	---
1	4	Pavir.Ib03660.1.p|PACid:30238462	Pavir.Ib03660.1.p|PACid:30238462	1951	84420	104	104	25	25	46.6	5.71	484084	1	0	0	761.409	2281.2	3	2281.2	0.0017	0	30.13	18	34	0.0037	R	IINEPTAAALSYGMNNK	E	Deamidated (NQ); Oxidation (M)	0.00000000000003100.0			File4260 Spectrum516038 scans: 27156	126/130C	---	127c/130C	---	128c/130C	---	129c/130C	---	131/130C	---	127n/130C	---	128n/130C	---	129n/130C	---
1	4	Pavir.Ib03660.1.p|PACid:30238462	Pavir.Ib03660.1.p|PACid:30238462	1951	84420	104	104	25	25	46.6	5.71	484085	1	0	0	761.409	2281.2	3	2281.2	0.0021	0	28.64	18	34	0.0051	R	IINEPTAAALSYGMNNK	E	Deamidated (NQ); Oxidation (M)	0.00000000000003010.0			File4259 Spectrum472858 scans: 27047	126/130C	---	127c/130C	---	128c/130C	---	129c/130C	---	131/130C	---	127n/130C	---	128n/130C	---	129n/130C	---
1	4	Pavir.Ib03660.1.p|PACid:30238462	Pavir.Ib03660.1.p|PACid:30238462	1951	84420	104	104	25	25	46.6	5.71	484109	1	0	0	761.415	2281.22	3	2281.2	0.0213	0	33.02	17	34	0.0015	R	IINEPTAAALSYGMNNK	E	Deamidated (NQ); Oxidation (M)	0.00000000000003010.0			File4250 Spectrum107800 scans: 26369	126/130C	---	127c/130C	---	128c/130C	---	129c/130C	---	131/130C	---	127n/130C	---	128n/130C	---	129n/130C	---
1	4	Pavir.Ib03660.1.p|PACid:30238462	Pavir.Ib03660.1.p|PACid:30238462	1951	84420	104	104	25	25	46.6	5.71	485096	1	0	0	762.736	2285.19	3	2285.18	0.0017	1	46.44	21	34	0.00018	K	MVQEAELHAQKDQER	K	Oxidation (M)	0.300000000000000.0			File4257 Spectrum370414 scans: 10092	126/130C	---	127c/130C	---	128c/130C	---	129c/130C	---	131/130C	---	127n/130C	---	128n/130C	---	129n/130C	---
1	4	Pavir.Ib03660.1.p|PACid:30238462	Pavir.Ib03660.1.p|PACid:30238462	1951	84420	104	104	25	25	46.6	5.71	485101	1	0	0	762.736	2285.19	3	2285.18	0.0027	1	37.45	17	34	0.00055	K	MVQEAELHAQKDQER	K	Oxidation (M)	0.300000000000000.0			File4263 Spectrum632701 scans: 9496	126/130C	---	127c/130C	---	128c/130C	---	129c/130C	---	131/130C	---	127n/130C	---	128n/130C	---	129n/130C	---
1	4	Pavir.Ib03660.1.p|PACid:30238462	Pavir.Ib03660.1.p|PACid:30238462	1951	84420	104	104	25	25	46.6	5.71	485102	1	0	0	572.304	2285.19	4	2285.18	0.0028	1	28.85	20	34	0.0066	K	MVQEAELHAQKDQER	K	Oxidation (M)	0.300000000000000.0			File4263 Spectrum632499 scans: 9263	126/130C	---	127c/130C	---	128c/130C	---	129c/130C	---	131/130C	---	127n/130C	---	128n/130C	---	129n/130C	---
1	4	Pavir.Ib03660.1.p|PACid:30238462	Pavir.Ib03660.1.p|PACid:30238462	1951	84420	104	104	25	25	46.6	5.71	510114	1	0	1	794.104	2379.29	3	2379.29	0.0001	1	59.6	16	34	2.6e-06	K	KSQAFSTAADNQTQVGIR	V					File4262 Spectrum594298 scans: 15742	126/130C	1.003	127c/130C	1.037	128c/130C	1.24	129c/130C	1.175	131/130C	1.049	127n/130C	1.205	128n/130C	0.909	129n/130C	1.134
1	4	Pavir.Ib03660.1.p|PACid:30238462	Pavir.Ib03660.1.p|PACid:30238462	1951	84420	104	104	25	25	46.6	5.71	510116	1	0	1	794.105	2379.29	3	2379.29	0.0014	1	49.26	16	34	2.4e-05	K	KSQAFSTAADNQTQVGIR	V					File4262 Spectrum594557 scans: 16023	126/130C	0.863	127c/130C	0.763	128c/130C	0.906	129c/130C	1.057	131/130C	0.878	127n/130C	0.788	128n/130C	0.737	129n/130C	0.769
1	4	Pavir.Ib03660.1.p|PACid:30238462	Pavir.Ib03660.1.p|PACid:30238462	1951	84420	104	104	25	25	46.6	5.71	603754	1	0	0	938.185	2811.53	3	2811.53	0.0026	1	38.98	24	34	0.0018	K	GVNPDEAVAMGAAIQGGILRGDVK	E	Oxidation (M)	0.000000000300000000000000.0			File4262 Spectrum607111 scans: 29687	126/130C	---	127c/130C	---	128c/130C	---	129c/130C	---	131/130C	---	127n/130C	---	128n/130C	---	129n/130C	---
1	4	Pavir.Ib03660.1.p|PACid:30238462	Pavir.Ib03660.1.p|PACid:30238462	1951	84420	104	104	25	25	46.6	5.71	603755	1	0	0	703.891	2811.53	4	2811.53	0.003	1	29.11	17	34	0.0032	K	GVNPDEAVAMGAAIQGGILRGDVK	E	Oxidation (M)	0.000000000300000000000000.0			File4255 Spectrum325560 scans: 29041	126/130C	---	127c/130C	---	128c/130C	---	129c/130C	---	131/130C	---	127n/130C	---	128n/130C	---	129n/130C	---
1	4	Pavir.Ib03660.1.p|PACid:30238462	Pavir.Ib03660.1.p|PACid:30238462	1951	84420	104	104	25	25	46.6	5.71	603761	1	0	0	938.187	2811.54	3	2811.53	0.0077	1	26.56	16	34	0.0046	K	GVNPDEAVAMGAAIQGGILRGDVK	E	Oxidation (M)	0.000000000300000000000000.0			File4262 Spectrum606859 scans: 29413	126/130C	---	127c/130C	---	128c/130C	---	129c/130C	---	131/130C	---	127n/130C	---	128n/130C	---	129n/130C	---
1	4	Pavir.Ib03660.1.p|PACid:30238462	Pavir.Ib03660.1.p|PACid:30238462	1951	84420	104	104	25	25	46.6	5.71	603904	1	0	0	704.142	2812.54	4	2812.52	0.0214	1	27.76	16	34	0.0034	K	GVNPDEAVAMGAAIQGGILRGDVK	E	Deamidated (NQ); Oxidation (M)	0.000000000300001000000000.0			File4255 Spectrum325524 scans: 29001	126/130C	---	127c/130C	---	128c/130C	---	129c/130C	---	131/130C	---	127n/130C	---	128n/130C	---	129n/130C	---
1	4	Pavir.Ib03660.1.p|PACid:30238462	Pavir.Ib03660.1.p|PACid:30238462	1951	84420	104	104	25	25	46.6	5.71	613760	1	0	1	957.157	2868.45	3	2868.44	0.0062	0	59.96		34	0.00016	K	AAGNEVIGIDLGTTNSCVAVMEGK	N	Methylthio (C); Oxidation (M)	0.000000000000000020003000.0			File4258 Spectrum435474 scans: 34009	126/130C	0.613	127c/130C	0.86	128c/130C	1	129c/130C	1.1	131/130C	0.954	127n/130C	0.805	128n/130C	0.96	129n/130C	0.898
1	4	Pavir.Ib03660.1.p|PACid:30238462	Pavir.Ib03660.1.p|PACid:30238462	1951	84420	104	104	25	25	46.6	5.71	672932	1	0	1	1122.63	3364.87	3	3364.87	-0.0009	1	32.01	16	33	0.0014	K	AKVELSSTSQTEINLPFITADASGAK	H					File4250 Spectrum114795 scans: 34013	126/130C	0.839	127c/130C	0.437	128c/130C	1.359	129c/130C	-0.164	131/130C	0.998	127n/130C	0.75	128n/130C	0.49	129n/130C	-0.122
1	4	Pavir.Ib03660.1.p|PACid:30238462	Pavir.Ib03660.1.p|PACid:30238462	1951	84420	104	104	25	25	46.6	5.71	672949	1	0	1	842.225	3364.87	4	3364.87	0.0022	1	41.64	20	33	0.00039	K	AKVELSSTSQTEINLPFITADASGAK	H					File4250 Spectrum115271 scans: 34535	126/130C	1.018	127c/130C	1.136	128c/130C	1.174	129c/130C	1.134	131/130C	0.967	127n/130C	0.835	128n/130C	1.148	129n/130C	1.348
1	4	Pavir.Ib03660.1.p|PACid:30238462	Pavir.Ib03660.1.p|PACid:30238462	1951	84420	104	104	25	25	46.6	5.71	672957	1	0	1	842.226	3364.87	4	3364.87	0.0034	1	41.12	22	33	0.00075	K	AKVELSSTSQTEINLPFITADASGAK	H					File4250 Spectrum115544 scans: 34836	126/130C	1.147	127c/130C	1.008	128c/130C	1.434	129c/130C	1.327	131/130C	1.356	127n/130C	1.178	128n/130C	1.02	129n/130C	1.69
1	4	Pavir.Ib03660.1.p|PACid:30238462	Pavir.Ib03660.1.p|PACid:30238462	1951	84420	104	104	25	25	46.6	5.71	672966	1	0	1	842.226	3364.88	4	3364.87	0.0054	1	44.98	21	33	0.00023	K	AKVELSSTSQTEINLPFITADASGAK	H					File4250 Spectrum115505 scans: 34794	126/130C	1.032	127c/130C	0.746	128c/130C	1.248	129c/130C	1.668	131/130C	1.047	127n/130C	1.22	128n/130C	0.749	129n/130C	1.187
1	4	Pavir.Ib03660.1.p|PACid:30238462	Pavir.Ib03660.1.p|PACid:30238462	1951	84420	104	104	25	25	46.6	5.71	703041	1	0	1	836.613	4178.03	5	4178.01	0.0218	1	84.82	22	35	3e-08	K	IGQHMSGGGSGGSQSGSGPQSGGDQAPEAEYEEVKK	-	Deamidated (NQ)	0.000000000000000000000000100000000000.0			File4251 Spectrum144002 scans: 17935	126/130C	0.902	127c/130C	1.355	128c/130C	1.276	129c/130C	1.397	131/130C	1.189	127n/130C	0.708	128n/130C	0.955	129n/130C	1.106
1	4	Pavir.Ib03660.1.p|PACid:30238462	Pavir.Ib03660.1.p|PACid:30238462	1951	84420	104	104	25	25	46.6	5.71	703396	1	0	1	1049.26	4193.02	4	4193.02	0.0065	1	43.5	21	34	0.00035	K	IGQHMSGGGSGGSQSGSGPQSGGDQAPEAEYEEVKK	-	Oxidation (M)	0.000030000000000000000000000000000000.0			File4264 Spectrum682088 scans: 15969	126/130C	1.648	127c/130C	1.711	128c/130C	1.567	129c/130C	2.108	131/130C	1.496	127n/130C	1.462	128n/130C	0.845	129n/130C	1.585
1	4	Pavir.Ib03660.1.p|PACid:30238462	Pavir.Ib03660.1.p|PACid:30238462	1951	84420	104	104	25	25	46.6	5.71	703415	1	0	1	839.812	4194.02	5	4194	0.0193	1	30.39	21	34	0.0072	K	IGQHMSGGGSGGSQSGSGPQSGGDQAPEAEYEEVKK	-	Deamidated (NQ); Oxidation (M)	0.000030000000010000000000000000000000.0			File4264 Spectrum681861 scans: 15723	126/130C	0.506	127c/130C	0.731	128c/130C	0.573	129c/130C	1.039	131/130C	0.563	127n/130C	0.607	128n/130C	0.754	129n/130C	0.71
1	4	Pavir.Ib03660.1.p|PACid:30238462	Pavir.Ib03660.1.p|PACid:30238462	1951	84420	104	104	25	25	46.6	5.71	703418	1	0	1	839.812	4194.02	5	4194	0.0206	1	33.08	19	34	0.0023	K	IGQHMSGGGSGGSQSGSGPQSGGDQAPEAEYEEVKK	-	Deamidated (NQ); Oxidation (M)	0.000030000000010000000000000000000000.0			File4264 Spectrum679125 scans: 12742	126/130C	1.792	127c/130C	2.566	128c/130C	1.336	129c/130C	1.859	131/130C	1.161	127n/130C	1.972	128n/130C	1.847	129n/130C	1.902
1	4	Pavir.Ib03660.1.p|PACid:30238462	Pavir.Ib03660.1.p|PACid:30238462	1951	84420	104	104	25	25	46.6	5.71	703422	1	0	1	839.813	4194.03	5	4194	0.0248	1	70.8	25	35	1.3e-06	K	IGQHMSGGGSGGSQSGSGPQSGGDQAPEAEYEEVKK	-	Deamidated (NQ); Oxidation (M)	0.000030000000010000000000000000000000.0			File4264 Spectrum682127 scans: 16011	126/130C	0.85	127c/130C	1.006	128c/130C	0.848	129c/130C	1.456	131/130C	0.999	127n/130C	0.939	128n/130C	0.914	129n/130C	1.525
1	4	Pavir.Ib03660.1.p|PACid:30238462	Pavir.Ib03660.1.p|PACid:30238462	1951	84420	104	104	25	25	46.6	5.71	703441	1	0	1	840.012	4195.02	5	4194.99	0.0363	1	32.21	24	34	0.0083	K	IGQHMSGGGSGGSQSGSGPQSGGDQAPEAEYEEVKK	-	2 Deamidated (NQ); Oxidation (M)	0.000030000000010000000000100000000000.0			File4260 Spectrum503451 scans: 13441	126/130C	0.959	127c/130C	0.952	128c/130C	1.53	129c/130C	1.677	131/130C	1.265	127n/130C	1.129	128n/130C	1.544	129n/130C	0.979
1	4	Pavir.Ib03660.1.p|PACid:30238462	Pavir.Ib03660.1.p|PACid:30238462	1951	84420	104	104	25	25	46.6	5.71	703447	1	0	1	840.013	4195.03	5	4194.99	0.0427	1	27.72	19	35	0.008	K	IGQHMSGGGSGGSQSGSGPQSGGDQAPEAEYEEVKK	-	2 Deamidated (NQ); Oxidation (M)	0.000030000000000000010000100000000000.0			File4263 Spectrum635675 scans: 12820	126/130C	0.745	127c/130C	1.174	128c/130C	1.179	129c/130C	1.298	131/130C	1.371	127n/130C	1.003	128n/130C	0.714	129n/130C	0.756
1	4	Pavir.Ib03660.1.p|PACid:30238462	Pavir.Ib03660.1.p|PACid:30238462	1951	84420	104	104	25	25	46.6	5.71	703471	1	0	1	840.213	4196.03	5	4195.97	0.0612	1	58.06	23	35	1.9e-05	K	IGQHMSGGGSGGSQSGSGPQSGGDQAPEAEYEEVKK	-	3 Deamidated (NQ); Oxidation (M)	0.000030000000010000010000100000000000.0			File4251 Spectrum142254 scans: 16015	126/130C	0.964	127c/130C	1.078	128c/130C	1.085	129c/130C	1.256	131/130C	1.013	127n/130C	0.811	128n/130C	1.163	129n/130C	1.121
1	5	Pavir.Ia03665.1.p|PACid:30210947	Pavir.Ia03665.1.p|PACid:30210947	1927	84329	109	109	14	14	21.3	5.32	109918	1	0	0	670.346	1338.68	2	1338.68	0.002	0	29.26	21	30	0.0079	K	CMEPVEK	C	Methylthio (C)	0.2000000.0			File4259 Spectrum465471 scans: 18921	126/130C	---	127c/130C	---	128c/130C	---	129c/130C	---	131/130C	---	127n/130C	---	128n/130C	---	129n/130C	---
1	5	Pavir.Ia03665.1.p|PACid:30210947	Pavir.Ia03665.1.p|PACid:30210947	1927	84329	109	109	14	14	21.3	5.32	152433	1	0	1	722.911	1443.81	2	1443.81	0.0011	0	61.81	27	32	1.8e-05	K	DAGVIAGLNVMR	I					File4259 Spectrum472559 scans: 26717	126/130C	1.25	127c/130C	1.277	128c/130C	1.063	129c/130C	1.776	131/130C	1.449	127n/130C	1.391	128n/130C	0.971	129n/130C	1.286
1	5	Pavir.Ia03665.1.p|PACid:30210947	Pavir.Ia03665.1.p|PACid:30210947	1927	84329	109	109	14	14	21.3	5.32	152434	1	0	1	482.277	1443.81	3	1443.81	0.0013	0	47.68	30	32	0.00098	K	DAGVIAGLNVMR	I					File4259 Spectrum472570 scans: 26729	126/130C	1.323	127c/130C	1.286	128c/130C	1.041	129c/130C	1.559	131/130C	1.391	127n/130C	1.053	128n/130C	1.156	129n/130C	1.005
1	5	Pavir.Ia03665.1.p|PACid:30210947	Pavir.Ia03665.1.p|PACid:30210947	1927	84329	109	109	14	14	21.3	5.32	158066	1	0	0	729.4	1456.79	2	1456.78	0.0013	0	55.5	22	31	2.5e-05	R	VEIIANDQGNR	T					File4249 Spectrum52623 scans: 14395	126/130C	---	127c/130C	---	128c/130C	---	129c/130C	---	131/130C	---	127n/130C	---	128n/130C	---	129n/130C	---
1	5	Pavir.Ia03665.1.p|PACid:30210947	Pavir.Ia03665.1.p|PACid:30210947	1927	84329	109	109	14	14	21.3	5.32	158365	1	0	0	729.892	1457.77	2	1457.77	0.0012	0	52.57	24	31	7.4e-05	R	VEIIANDQGNR	T	Deamidated (NQ)	0.00000100000.0			File4259 Spectrum462868 scans: 16055	126/130C	---	127c/130C	---	128c/130C	---	129c/130C	---	131/130C	---	127n/130C	---	128n/130C	---	129n/130C	---
1	5	Pavir.Ia03665.1.p|PACid:30210947	Pavir.Ia03665.1.p|PACid:30210947	1927	84329	109	109	14	14	21.3	5.32	158368	1	0	0	729.892	1457.77	2	1457.77	0.0017	0	35	24	31	0.0045	R	VEIIANDQGNR	T	Deamidated (NQ)	0.00000100000.0			File4261 Spectrum550017 scans: 16001	126/130C	---	127c/130C	---	128c/130C	---	129c/130C	---	131/130C	---	127n/130C	---	128n/130C	---	129n/130C	---
1	5	Pavir.Ia03665.1.p|PACid:30210947	Pavir.Ia03665.1.p|PACid:30210947	1927	84329	109	109	14	14	21.3	5.32	158370	1	0	0	729.892	1457.77	2	1457.77	0.0018	0	50.59	26	31	0.00019	R	VEIIANDQGNR	T	Deamidated (NQ)	0.00000000010.0			File4262 Spectrum593972 scans: 15390	126/130C	---	127c/130C	---	128c/130C	---	129c/130C	---	131/130C	---	127n/130C	---	128n/130C	---	129n/130C	---
1	5	Pavir.Ia03665.1.p|PACid:30210947	Pavir.Ia03665.1.p|PACid:30210947	1927	84329	109	109	14	14	21.3	5.32	159429	1	0	1	730.909	1459.8	2	1459.8	0.0011	0	55.72	29	32	0.00011	K	DAGVIAGLNVMR	I	Oxidation (M)	0.000000000030.0			File4254 Spectrum274677 scans: 20445	126/130C	4.046	127c/130C	4.107	128c/130C	2.359	129c/130C	2.197	131/130C	0.323	127n/130C	3.699	128n/130C	1.784	129n/130C	1.52
1	5	Pavir.Ia03665.1.p|PACid:30210947	Pavir.Ia03665.1.p|PACid:30210947	1927	84329	109	109	14	14	21.3	5.32	159431	1	0	1	487.608	1459.8	3	1459.8	0.0015	0	40.72	27	32	0.0025	K	DAGVIAGLNVMR	I	Oxidation (M)	0.000000000030.0			File4258 Spectrum423438 scans: 20826	126/130C	0.992	127c/130C	1.166	128c/130C	0.899	129c/130C	1.332	131/130C	0.97	127n/130C	1.116	128n/130C	0.962	129n/130C	1.008
1	5	Pavir.Ia03665.1.p|PACid:30210947	Pavir.Ia03665.1.p|PACid:30210947	1927	84329	109	109	14	14	21.3	5.32	159434	1	0	1	730.909	1459.8	2	1459.8	0.0021	0	58.11	20	32	7.8e-06	K	DAGVIAGLNVMR	I	Oxidation (M)	0.000000000030.0			File4258 Spectrum423658 scans: 21066	126/130C	0.84	127c/130C	0.988	128c/130C	0.897	129c/130C	1.152	131/130C	0.983	127n/130C	1.04	128n/130C	0.913	129n/130C	1.003
1	5	Pavir.Ia03665.1.p|PACid:30210947	Pavir.Ia03665.1.p|PACid:30210947	1927	84329	109	109	14	14	21.3	5.32	159437	1	0	1	730.909	1459.8	2	1459.8	0.0023	0	62.73	19	32	2.5e-06	K	DAGVIAGLNVMR	I	Oxidation (M)	0.000000000030.0			File4259 Spectrum467405 scans: 21052	126/130C	0.787	127c/130C	0.945	128c/130C	0.875	129c/130C	1.496	131/130C	1.039	127n/130C	0.9	128n/130C	0.677	129n/130C	0.847
1	5	Pavir.Ia03665.1.p|PACid:30210947	Pavir.Ia03665.1.p|PACid:30210947	1927	84329	109	109	14	14	21.3	5.32	159439	1	0	1	730.909	1459.8	2	1459.8	0.0024	0	53.6	22	32	3.7e-05	K	DAGVIAGLNVMR	I	Oxidation (M)	0.000000000030.0			File4258 Spectrum423412 scans: 20797	126/130C	1.089	127c/130C	1.094	128c/130C	1.051	129c/130C	1.246	131/130C	1.198	127n/130C	1.157	128n/130C	0.964	129n/130C	1.159
1	5	Pavir.Ia03665.1.p|PACid:30210947	Pavir.Ia03665.1.p|PACid:30210947	1927	84329	109	109	14	14	21.3	5.32	201422	1	0	0	779.893	1557.77	2	1557.77	0.0005	0	40.43	23	30	0.0011	R	FEELNMDLFR	K	Oxidation (M)	0.0000030000.0			File4253 Spectrum242175 scans: 31934	126/130C	---	127c/130C	---	128c/130C	---	129c/130C	---	131/130C	---	127n/130C	---	128n/130C	---	129n/130C	---
1	5	Pavir.Ia03665.1.p|PACid:30210947	Pavir.Ia03665.1.p|PACid:30210947	1927	84329	109	109	14	14	21.3	5.32	201428	1	0	0	779.893	1557.77	2	1557.77	0.0019	0	49.94	24	30	0.00015	R	FEELNMDLFR	K	Oxidation (M)	0.0000030000.0			File4259 Spectrum477616 scans: 32444	126/130C	---	127c/130C	---	128c/130C	---	129c/130C	---	131/130C	---	127n/130C	---	128n/130C	---	129n/130C	---
1	5	Pavir.Ia03665.1.p|PACid:30210947	Pavir.Ia03665.1.p|PACid:30210947	1927	84329	109	109	14	14	21.3	5.32	213611	1	0	0	794.394	1586.77	2	1586.77	0.0013	0	46.47	23	29	0.00023	R	NALENYAYNMR	N					File4251 Spectrum148231 scans: 22535	126/130C	---	127c/130C	---	128c/130C	---	129c/130C	---	131/130C	---	127n/130C	---	128n/130C	---	129n/130C	---
1	5	Pavir.Ia03665.1.p|PACid:30210947	Pavir.Ia03665.1.p|PACid:30210947	1927	84329	109	109	14	14	21.3	5.32	213612	1	0	0	529.932	1586.77	3	1586.77	0.0019	0	30.91	17	29	0.0023	R	NALENYAYNMR	N					File4251 Spectrum148311 scans: 22622	126/130C	---	127c/130C	---	128c/130C	---	129c/130C	---	131/130C	---	127n/130C	---	128n/130C	---	129n/130C	---
1	5	Pavir.Ia03665.1.p|PACid:30210947	Pavir.Ia03665.1.p|PACid:30210947	1927	84329	109	109	14	14	21.3	5.32	213613	1	0	0	794.394	1586.77	2	1586.77	0.003	0	32.14	18	29	0.0019	R	NALENYAYNMR	N					File4252 Spectrum190835 scans: 22316	126/130C	---	127c/130C	---	128c/130C	---	129c/130C	---	131/130C	---	127n/130C	---	128n/130C	---	129n/130C	---
1	5	Pavir.Ia03665.1.p|PACid:30210947	Pavir.Ia03665.1.p|PACid:30210947	1927	84329	109	109	14	14	21.3	5.32	215203	1	0	0	795.514	1589.01	2	1589.01	0.0015	1	21.86	14	28	0.0089	R	NTTIPTKK	E					File4254 Spectrum265144 scans: 9995	126/130C	---	127c/130C	---	128c/130C	---	129c/130C	---	131/130C	---	127n/130C	---	128n/130C	---	129n/130C	---
1	5	Pavir.Ia03665.1.p|PACid:30210947	Pavir.Ia03665.1.p|PACid:30210947	1927	84329	109	109	14	14	21.3	5.32	215225	1	0	0	795.514	1589.01	2	1589.01	0.0016	1	24.66	14	28	0.0049	R	NTTIPTKK	E					File4254 Spectrum265392 scans: 10269	126/130C	---	127c/130C	---	128c/130C	---	129c/130C	---	131/130C	---	127n/130C	---	128n/130C	---	129n/130C	---
1	5	Pavir.Ia03665.1.p|PACid:30210947	Pavir.Ia03665.1.p|PACid:30210947	1927	84329	109	109	14	14	21.3	5.32	215235	1	0	0	795.514	1589.01	2	1589.01	0.0017	1	24.75	14	28	0.0048	R	NTTIPTKK	E					File4253 Spectrum222379 scans: 10139	126/130C	---	127c/130C	---	128c/130C	---	129c/130C	---	131/130C	---	127n/130C	---	128n/130C	---	129n/130C	---
1	5	Pavir.Ia03665.1.p|PACid:30210947	Pavir.Ia03665.1.p|PACid:30210947	1927	84329	109	109	14	14	21.3	5.32	215711	1	0	0	796.014	1590.01	2	1590	0.0184	1	23.25	15	30	0.0075	R	NTTIPTKK	E	Deamidated (NQ)	0.10000000.0			File4254 Spectrum265638 scans: 10541	126/130C	---	127c/130C	---	128c/130C	---	129c/130C	---	131/130C	---	127n/130C	---	128n/130C	---	129n/130C	---
1	5	Pavir.Ia03665.1.p|PACid:30210947	Pavir.Ia03665.1.p|PACid:30210947	1927	84329	109	109	14	14	21.3	5.32	221281	1	0	0	802.39	1602.77	2	1602.77	0.0002	0	28.81	16	28	0.003	R	NALENYAYNMR	N	Oxidation (M)	0.00000000030.0			File4263 Spectrum639543 scans: 17077	126/130C	---	127c/130C	---	128c/130C	---	129c/130C	---	131/130C	---	127n/130C	---	128n/130C	---	129n/130C	---
1	5	Pavir.Ia03665.1.p|PACid:30210947	Pavir.Ia03665.1.p|PACid:30210947	1927	84329	109	109	14	14	21.3	5.32	221284	1	0	0	802.391	1602.77	2	1602.77	0.0007	0	48.97	19	28	5.9e-05	R	NALENYAYNMR	N	Oxidation (M)	0.00000000030.0			File4251 Spectrum143414 scans: 17293	126/130C	---	127c/130C	---	128c/130C	---	129c/130C	---	131/130C	---	127n/130C	---	128n/130C	---	129n/130C	---
1	5	Pavir.Ia03665.1.p|PACid:30210947	Pavir.Ia03665.1.p|PACid:30210947	1927	84329	109	109	14	14	21.3	5.32	275192	1	0	0	858.937	1715.86	2	1715.86	0.0016	0	48.92	19	31	5.7e-05	R	TTPSYVAFTDTER	L					File4263 Spectrum642482 scans: 20274	126/130C	---	127c/130C	---	128c/130C	---	129c/130C	---	131/130C	---	127n/130C	---	128n/130C	---	129n/130C	---
1	5	Pavir.Ia03665.1.p|PACid:30210947	Pavir.Ia03665.1.p|PACid:30210947	1927	84329	109	109	14	14	21.3	5.32	275193	1	0	0	572.96	1715.86	3	1715.86	0.0017	0	21.93	14	31	0.0088	R	TTPSYVAFTDTER	L					File4263 Spectrum642552 scans: 20350	126/130C	---	127c/130C	---	128c/130C	---	129c/130C	---	131/130C	---	127n/130C	---	128n/130C	---	129n/130C	---
1	5	Pavir.Ia03665.1.p|PACid:30210947	Pavir.Ia03665.1.p|PACid:30210947	1927	84329	109	109	14	14	21.3	5.32	275194	1	0	0	858.937	1715.86	2	1715.86	0.0017	0	32.86	18	31	0.002	R	TTPSYVAFTDTER	L					File4262 Spectrum598567 scans: 20402	126/130C	---	127c/130C	---	128c/130C	---	129c/130C	---	131/130C	---	127n/130C	---	128n/130C	---	129n/130C	---
1	5	Pavir.Ia03665.1.p|PACid:30210947	Pavir.Ia03665.1.p|PACid:30210947	1927	84329	109	109	14	14	21.3	5.32	276246	1	0	0	860.003	1717.99	2	1717.99	-0.0003	0	32.26	17	32	0.0019	R	LVNHFVQEFK	R					File4263 Spectrum657382 scans: 36749	126/130C	---	127c/130C	---	128c/130C	---	129c/130C	---	131/130C	---	127n/130C	---	128n/130C	---	129n/130C	---
1	5	Pavir.Ia03665.1.p|PACid:30210947	Pavir.Ia03665.1.p|PACid:30210947	1927	84329	109	109	14	14	21.3	5.32	276247	1	0	0	860.004	1717.99	2	1717.99	0.0004	0	25.54	15	33	0.0054	R	LVNHFVQEFK	R					File4263 Spectrum656508 scans: 35745	126/130C	---	127c/130C	---	128c/130C	---	129c/130C	---	131/130C	---	127n/130C	---	128n/130C	---	129n/130C	---
1	5	Pavir.Ia03665.1.p|PACid:30210947	Pavir.Ia03665.1.p|PACid:30210947	1927	84329	109	109	14	14	21.3	5.32	276248	1	0	0	860.004	1717.99	2	1717.99	0.0005	0	37.24	16	33	0.00042	R	LVNHFVQEFK	R					File4255 Spectrum328608 scans: 32376	126/130C	---	127c/130C	---	128c/130C	---	129c/130C	---	131/130C	---	127n/130C	---	128n/130C	---	129n/130C	---
1	5	Pavir.Ia03665.1.p|PACid:30210947	Pavir.Ia03665.1.p|PACid:30210947	1927	84329	109	109	14	14	21.3	5.32	276256	1	0	0	860.004	1717.99	2	1717.99	0.0014	0	47.45	22	33	0.00014	R	LVNHFVQEFK	R					File4263 Spectrum657173 scans: 36502	126/130C	---	127c/130C	---	128c/130C	---	129c/130C	---	131/130C	---	127n/130C	---	128n/130C	---	129n/130C	---
1	5	Pavir.Ia03665.1.p|PACid:30210947	Pavir.Ia03665.1.p|PACid:30210947	1927	84329	109	109	14	14	21.3	5.32	276258	1	0	0	860.004	1717.99	2	1717.99	0.0015	0	42.22	19	32	0.0003	R	LVNHFVQEFK	R					File4263 Spectrum656954 scans: 36252	126/130C	---	127c/130C	---	128c/130C	---	129c/130C	---	131/130C	---	127n/130C	---	128n/130C	---	129n/130C	---
1	5	Pavir.Ia03665.1.p|PACid:30210947	Pavir.Ia03665.1.p|PACid:30210947	1927	84329	109	109	14	14	21.3	5.32	276263	1	0	0	860.004	1717.99	2	1717.99	0.0017	0	42.4	20	33	0.00031	R	LVNHFVQEFK	R					File4263 Spectrum656733 scans: 36001	126/130C	---	127c/130C	---	128c/130C	---	129c/130C	---	131/130C	---	127n/130C	---	128n/130C	---	129n/130C	---
1	5	Pavir.Ia03665.1.p|PACid:30210947	Pavir.Ia03665.1.p|PACid:30210947	1927	84329	109	109	14	14	21.3	5.32	276271	1	0	0	860.005	1718	2	1717.99	0.0031	0	28.16	19	32	0.0075	R	LVNHFVQEFK	R					File4255 Spectrum328860 scans: 32651	126/130C	---	127c/130C	---	128c/130C	---	129c/130C	---	131/130C	---	127n/130C	---	128n/130C	---	129n/130C	---
1	5	Pavir.Ia03665.1.p|PACid:30210947	Pavir.Ia03665.1.p|PACid:30210947	1927	84329	109	109	14	14	21.3	5.32	305958	1	0	0	595.976	1784.91	3	1784.91	-0.0016	1	28.88	14	32	0.002	R	ARFEELNMDLFR	K	Oxidation (M)	0.000000030000.0			File4259 Spectrum474220 scans: 28561	126/130C	---	127c/130C	---	128c/130C	---	129c/130C	---	131/130C	---	127n/130C	---	128n/130C	---	129n/130C	---
1	5	Pavir.Ia03665.1.p|PACid:30210947	Pavir.Ia03665.1.p|PACid:30210947	1927	84329	109	109	14	14	21.3	5.32	305964	1	0	0	595.977	1784.91	3	1784.91	0.0009	1	25.96	15	32	0.0046	R	ARFEELNMDLFR	K	Oxidation (M)	0.000000030000.0			File4260 Spectrum515746 scans: 26839	126/130C	---	127c/130C	---	128c/130C	---	129c/130C	---	131/130C	---	127n/130C	---	128n/130C	---	129n/130C	---
1	5	Pavir.Ia03665.1.p|PACid:30210947	Pavir.Ia03665.1.p|PACid:30210947	1927	84329	109	109	14	14	21.3	5.32	305965	1	0	0	595.977	1784.91	3	1784.91	0.0013	1	36.89	18	32	0.00069	R	ARFEELNMDLFR	K	Oxidation (M)	0.000000030000.0			File4258 Spectrum429573 scans: 27518	126/130C	---	127c/130C	---	128c/130C	---	129c/130C	---	131/130C	---	127n/130C	---	128n/130C	---	129n/130C	---
1	5	Pavir.Ia03665.1.p|PACid:30210947	Pavir.Ia03665.1.p|PACid:30210947	1927	84329	109	109	14	14	21.3	5.32	305971	1	0	0	595.977	1784.91	3	1784.91	0.0018	1	27.89	20	32	0.0085	R	ARFEELNMDLFR	K	Oxidation (M)	0.000000030000.0			File4259 Spectrum474681 scans: 29077	126/130C	---	127c/130C	---	128c/130C	---	129c/130C	---	131/130C	---	127n/130C	---	128n/130C	---	129n/130C	---
1	5	Pavir.Ia03665.1.p|PACid:30210947	Pavir.Ia03665.1.p|PACid:30210947	1927	84329	109	109	14	14	21.3	5.32	305973	1	0	0	595.977	1784.91	3	1784.91	0.002	1	25.18	17	32	0.008	R	ARFEELNMDLFR	K	Oxidation (M)	0.000000030000.0			File4253 Spectrum236936 scans: 26143	126/130C	---	127c/130C	---	128c/130C	---	129c/130C	---	131/130C	---	127n/130C	---	128n/130C	---	129n/130C	---
1	5	Pavir.Ia03665.1.p|PACid:30210947	Pavir.Ia03665.1.p|PACid:30210947	1927	84329	109	109	14	14	21.3	5.32	305974	1	0	0	595.977	1784.91	3	1784.91	0.0022	1	34.7	20	32	0.0018	R	ARFEELNMDLFR	K	Oxidation (M)	0.000000030000.0			File4259 Spectrum474454 scans: 28823	126/130C	---	127c/130C	---	128c/130C	---	129c/130C	---	131/130C	---	127n/130C	---	128n/130C	---	129n/130C	---
1	5	Pavir.Ia03665.1.p|PACid:30210947	Pavir.Ia03665.1.p|PACid:30210947	1927	84329	109	109	14	14	21.3	5.32	305976	1	0	0	595.978	1784.91	3	1784.91	0.0029	1	33.84	22	32	0.0036	R	ARFEELNMDLFR	K	Oxidation (M)	0.000000030000.0			File4253 Spectrum236694 scans: 25877	126/130C	---	127c/130C	---	128c/130C	---	129c/130C	---	131/130C	---	127n/130C	---	128n/130C	---	129n/130C	---
1	5	Pavir.Ia03665.1.p|PACid:30210947	Pavir.Ia03665.1.p|PACid:30210947	1927	84329	109	109	14	14	21.3	5.32	355078	1	0	0	952.951	1903.89	2	1903.89	0.001	0	30.01	19	29	0.0046	K	ATAGDTHLGGEDFDNR	L					File4250 Spectrum94882 scans: 12304	126/130C	---	127c/130C	---	128c/130C	---	129c/130C	---	131/130C	---	127n/130C	---	128n/130C	---	129n/130C	---
1	5	Pavir.Ia03665.1.p|PACid:30210947	Pavir.Ia03665.1.p|PACid:30210947	1927	84329	109	109	14	14	21.3	5.32	355082	1	0	0	635.636	1903.89	3	1903.89	0.0011	0	26.6	19	29	0.0093	K	ATAGDTHLGGEDFDNR	L					File4249 Spectrum50395 scans: 11953	126/130C	---	127c/130C	---	128c/130C	---	129c/130C	---	131/130C	---	127n/130C	---	128n/130C	---	129n/130C	---
1	5	Pavir.Ia03665.1.p|PACid:30210947	Pavir.Ia03665.1.p|PACid:30210947	1927	84329	109	109	14	14	21.3	5.32	355084	1	0	0	952.951	1903.89	2	1903.89	0.0012	0	48.47	23	29	0.00014	K	ATAGDTHLGGEDFDNR	L					File4264 Spectrum678852 scans: 12447	126/130C	---	127c/130C	---	128c/130C	---	129c/130C	---	131/130C	---	127n/130C	---	128n/130C	---	129n/130C	---
1	5	Pavir.Ia03665.1.p|PACid:30210947	Pavir.Ia03665.1.p|PACid:30210947	1927	84329	109	109	14	14	21.3	5.32	355090	1	0	0	635.636	1903.89	3	1903.89	0.0012	0	25.43	17	29	0.0087	K	ATAGDTHLGGEDFDNR	L					File4264 Spectrum678841 scans: 12436	126/130C	---	127c/130C	---	128c/130C	---	129c/130C	---	131/130C	---	127n/130C	---	128n/130C	---	129n/130C	---
1	5	Pavir.Ia03665.1.p|PACid:30210947	Pavir.Ia03665.1.p|PACid:30210947	1927	84329	109	109	14	14	21.3	5.32	355099	1	0	0	635.636	1903.89	3	1903.89	0.0015	0	28.43	19	29	0.0061	K	ATAGDTHLGGEDFDNR	L					File4264 Spectrum678589 scans: 12161	126/130C	---	127c/130C	---	128c/130C	---	129c/130C	---	131/130C	---	127n/130C	---	128n/130C	---	129n/130C	---
1	5	Pavir.Ia03665.1.p|PACid:30210947	Pavir.Ia03665.1.p|PACid:30210947	1927	84329	109	109	14	14	21.3	5.32	355117	1	0	0	635.637	1903.89	3	1903.89	0.0018	0	24.56	15	29	0.006	K	ATAGDTHLGGEDFDNR	L					File4251 Spectrum138939 scans: 12369	126/130C	---	127c/130C	---	128c/130C	---	129c/130C	---	131/130C	---	127n/130C	---	128n/130C	---	129n/130C	---
1	5	Pavir.Ia03665.1.p|PACid:30210947	Pavir.Ia03665.1.p|PACid:30210947	1927	84329	109	109	14	14	21.3	5.32	355120	1	0	0	952.951	1903.89	2	1903.89	0.002	0	25.57	14	29	0.004	K	ATAGDTHLGGEDFDNR	L					File4264 Spectrum678687 scans: 12267	126/130C	---	127c/130C	---	128c/130C	---	129c/130C	---	131/130C	---	127n/130C	---	128n/130C	---	129n/130C	---
1	5	Pavir.Ia03665.1.p|PACid:30210947	Pavir.Ia03665.1.p|PACid:30210947	1927	84329	109	109	14	14	21.3	5.32	355125	1	0	0	635.637	1903.89	3	1903.89	0.002	0	28.51	18	29	0.0046	K	ATAGDTHLGGEDFDNR	L					File4249 Spectrum81797 scans: 46743	126/130C	---	127c/130C	---	128c/130C	---	129c/130C	---	131/130C	---	127n/130C	---	128n/130C	---	129n/130C	---
1	5	Pavir.Ia03665.1.p|PACid:30210947	Pavir.Ia03665.1.p|PACid:30210947	1927	84329	109	109	14	14	21.3	5.32	355126	1	0	0	635.637	1903.89	3	1903.89	0.002	0	23.11	14	29	0.0068	K	ATAGDTHLGGEDFDNR	L					File4249 Spectrum82164 scans: 47167	126/130C	---	127c/130C	---	128c/130C	---	129c/130C	---	131/130C	---	127n/130C	---	128n/130C	---	129n/130C	---
1	5	Pavir.Ia03665.1.p|PACid:30210947	Pavir.Ia03665.1.p|PACid:30210947	1927	84329	109	109	14	14	21.3	5.32	355137	1	0	0	952.952	1903.89	2	1903.89	0.0023	0	72.14	24	29	8.5e-07	K	ATAGDTHLGGEDFDNR	L					File4249 Spectrum50647 scans: 12237	126/130C	---	127c/130C	---	128c/130C	---	129c/130C	---	131/130C	---	127n/130C	---	128n/130C	---	129n/130C	---
1	5	Pavir.Ia03665.1.p|PACid:30210947	Pavir.Ia03665.1.p|PACid:30210947	1927	84329	109	109	14	14	21.3	5.32	355147	1	0	0	635.637	1903.89	3	1903.89	0.0025	0	29.63	21	29	0.0086	K	ATAGDTHLGGEDFDNR	L					File4249 Spectrum50625 scans: 12212	126/130C	---	127c/130C	---	128c/130C	---	129c/130C	---	131/130C	---	127n/130C	---	128n/130C	---	129n/130C	---
1	5	Pavir.Ia03665.1.p|PACid:30210947	Pavir.Ia03665.1.p|PACid:30210947	1927	84329	109	109	14	14	21.3	5.32	355151	1	0	0	952.952	1903.89	2	1903.89	0.0029	0	23.56	14	29	0.0062	K	ATAGDTHLGGEDFDNR	L					File4249 Spectrum50578 scans: 12158	126/130C	---	127c/130C	---	128c/130C	---	129c/130C	---	131/130C	---	127n/130C	---	128n/130C	---	129n/130C	---
1	5	Pavir.Ia03665.1.p|PACid:30210947	Pavir.Ia03665.1.p|PACid:30210947	1927	84329	109	109	14	14	21.3	5.32	355153	1	0	0	952.952	1903.89	2	1903.89	0.0032	0	26.18	18	29	0.0082	K	ATAGDTHLGGEDFDNR	L					File4255 Spectrum309583 scans: 11602	126/130C	---	127c/130C	---	128c/130C	---	129c/130C	---	131/130C	---	127n/130C	---	128n/130C	---	129n/130C	---
1	5	Pavir.Ia03665.1.p|PACid:30210947	Pavir.Ia03665.1.p|PACid:30210947	1927	84329	109	109	14	14	21.3	5.32	355155	1	0	0	952.952	1903.89	2	1903.89	0.0033	0	46.57	22	29	0.0002	K	ATAGDTHLGGEDFDNR	L					File4249 Spectrum50421 scans: 11981	126/130C	---	127c/130C	---	128c/130C	---	129c/130C	---	131/130C	---	127n/130C	---	128n/130C	---	129n/130C	---
1	5	Pavir.Ia03665.1.p|PACid:30210947	Pavir.Ia03665.1.p|PACid:30210947	1927	84329	109	109	14	14	21.3	5.32	355156	1	0	0	952.952	1903.89	2	1903.89	0.0035	0	49.46	23	29	0.00012	K	ATAGDTHLGGEDFDNR	L					File4264 Spectrum678597 scans: 12169	126/130C	---	127c/130C	---	128c/130C	---	129c/130C	---	131/130C	---	127n/130C	---	128n/130C	---	129n/130C	---
1	5	Pavir.Ia03665.1.p|PACid:30210947	Pavir.Ia03665.1.p|PACid:30210947	1927	84329	109	109	14	14	21.3	5.32	434546	1	0	0	706.745	2117.21	3	2117.21	0	0	27.74	16	33	0.004	R	IINEPTAAAIAYGLDK	K					File4262 Spectrum613316 scans: 36497	126/130C	---	127c/130C	---	128c/130C	---	129c/130C	---	131/130C	---	127n/130C	---	128n/130C	---	129n/130C	---
1	5	Pavir.Ia03665.1.p|PACid:30210947	Pavir.Ia03665.1.p|PACid:30210947	1927	84329	109	109	14	14	21.3	5.32	434552	1	0	0	706.745	2117.21	3	2117.21	0.0009	0	25.13	14	33	0.0044	R	IINEPTAAAIAYGLDK	K					File4263 Spectrum657457 scans: 36836	126/130C	---	127c/130C	---	128c/130C	---	129c/130C	---	131/130C	---	127n/130C	---	128n/130C	---	129n/130C	---
1	5	Pavir.Ia03665.1.p|PACid:30210947	Pavir.Ia03665.1.p|PACid:30210947	1927	84329	109	109	14	14	21.3	5.32	434557	1	0	0	1059.62	2117.22	2	2117.21	0.0017	0	89.12	26	33	2.9e-08	R	IINEPTAAAIAYGLDK	K					File4263 Spectrum656566 scans: 35811	126/130C	---	127c/130C	---	128c/130C	---	129c/130C	---	131/130C	---	127n/130C	---	128n/130C	---	129n/130C	---
1	5	Pavir.Ia03665.1.p|PACid:30210947	Pavir.Ia03665.1.p|PACid:30210947	1927	84329	109	109	14	14	21.3	5.32	434558	1	0	0	706.746	2117.22	3	2117.21	0.0018	0	28.56	18	33	0.0048	R	IINEPTAAAIAYGLDK	K					File4263 Spectrum657247 scans: 36586	126/130C	---	127c/130C	---	128c/130C	---	129c/130C	---	131/130C	---	127n/130C	---	128n/130C	---	129n/130C	---
1	5	Pavir.Ia03665.1.p|PACid:30210947	Pavir.Ia03665.1.p|PACid:30210947	1927	84329	109	109	14	14	21.3	5.32	434563	1	0	0	706.746	2117.22	3	2117.21	0.0021	0	41.05	23	33	0.00084	R	IINEPTAAAIAYGLDK	K					File4262 Spectrum612447 scans: 35535	126/130C	---	127c/130C	---	128c/130C	---	129c/130C	---	131/130C	---	127n/130C	---	128n/130C	---	129n/130C	---
1	5	Pavir.Ia03665.1.p|PACid:30210947	Pavir.Ia03665.1.p|PACid:30210947	1927	84329	109	109	14	14	21.3	5.32	434564	1	0	0	706.746	2117.22	3	2117.21	0.0021	0	27.8	17	33	0.005	R	IINEPTAAAIAYGLDK	K					File4264 Spectrum699868 scans: 35324	126/130C	---	127c/130C	---	128c/130C	---	129c/130C	---	131/130C	---	127n/130C	---	128n/130C	---	129n/130C	---
1	5	Pavir.Ia03665.1.p|PACid:30210947	Pavir.Ia03665.1.p|PACid:30210947	1927	84329	109	109	14	14	21.3	5.32	434568	1	0	0	706.746	2117.22	3	2117.21	0.0023	0	30.93	22	33	0.007	R	IINEPTAAAIAYGLDK	K					File4263 Spectrum657027 scans: 36335	126/130C	---	127c/130C	---	128c/130C	---	129c/130C	---	131/130C	---	127n/130C	---	128n/130C	---	129n/130C	---
1	5	Pavir.Ia03665.1.p|PACid:30210947	Pavir.Ia03665.1.p|PACid:30210947	1927	84329	109	109	14	14	21.3	5.32	434569	1	0	0	706.746	2117.22	3	2117.21	0.0023	0	37.09	21	33	0.0013	R	IINEPTAAAIAYGLDK	K					File4263 Spectrum656808 scans: 36086	126/130C	---	127c/130C	---	128c/130C	---	129c/130C	---	131/130C	---	127n/130C	---	128n/130C	---	129n/130C	---
1	5	Pavir.Ia03665.1.p|PACid:30210947	Pavir.Ia03665.1.p|PACid:30210947	1927	84329	109	109	14	14	21.3	5.32	434571	1	0	0	706.746	2117.22	3	2117.21	0.0025	0	36.61	17	33	0.00056	R	IINEPTAAAIAYGLDK	K					File4263 Spectrum656356 scans: 35571	126/130C	---	127c/130C	---	128c/130C	---	129c/130C	---	131/130C	---	127n/130C	---	128n/130C	---	129n/130C	---
1	5	Pavir.Ia03665.1.p|PACid:30210947	Pavir.Ia03665.1.p|PACid:30210947	1927	84329	109	109	14	14	21.3	5.32	434580	1	0	0	1059.62	2117.22	2	2117.21	0.0039	0	55.29	27	33	7.5e-05	R	IINEPTAAAIAYGLDK	K					File4262 Spectrum612488 scans: 35580	126/130C	---	127c/130C	---	128c/130C	---	129c/130C	---	131/130C	---	127n/130C	---	128n/130C	---	129n/130C	---
1	5	Pavir.Ia03665.1.p|PACid:30210947	Pavir.Ia03665.1.p|PACid:30210947	1927	84329	109	109	14	14	21.3	5.32	434581	1	0	0	706.746	2117.22	3	2117.21	0.004	0	36.39	18	33	0.00079	R	IINEPTAAAIAYGLDK	K					File4263 Spectrum656581 scans: 35828	126/130C	---	127c/130C	---	128c/130C	---	129c/130C	---	131/130C	---	127n/130C	---	128n/130C	---	129n/130C	---
1	5	Pavir.Ia03665.1.p|PACid:30210947	Pavir.Ia03665.1.p|PACid:30210947	1927	84329	109	109	14	14	21.3	5.32	434582	1	0	0	706.746	2117.22	3	2117.21	0.004	0	35.95	16	33	0.00054	R	IINEPTAAAIAYGLDK	K					File4249 Spectrum71622 scans: 35126	126/130C	---	127c/130C	---	128c/130C	---	129c/130C	---	131/130C	---	127n/130C	---	128n/130C	---	129n/130C	---
1	5	Pavir.Ia03665.1.p|PACid:30210947	Pavir.Ia03665.1.p|PACid:30210947	1927	84329	109	109	14	14	21.3	5.32	434587	1	0	0	1059.62	2117.22	2	2117.21	0.0061	0	42.64	26	33	0.0011	R	IINEPTAAAIAYGLDK	K					File4262 Spectrum612243 scans: 35310	126/130C	---	127c/130C	---	128c/130C	---	129c/130C	---	131/130C	---	127n/130C	---	128n/130C	---	129n/130C	---
1	5	Pavir.Ia03665.1.p|PACid:30210947	Pavir.Ia03665.1.p|PACid:30210947	1927	84329	109	109	14	14	21.3	5.32	534108	1	0	0	825.832	2474.47	3	2474.47	0.0013	1	43.98		30	0.0023	R	IINEPTAAAIAYGLDKK	A					File4253 Spectrum245096 scans: 35218	126/130C	---	127c/130C	---	128c/130C	---	129c/130C	---	131/130C	---	127n/130C	---	128n/130C	---	129n/130C	---
1	5	Pavir.Ia03665.1.p|PACid:30210947	Pavir.Ia03665.1.p|PACid:30210947	1927	84329	109	109	14	14	21.3	5.32	534110	1	0	0	619.625	2474.47	4	2474.47	0.0014	1	25.86	18	30	0.0083	R	IINEPTAAAIAYGLDKK	A					File4253 Spectrum245292 scans: 35441	126/130C	---	127c/130C	---	128c/130C	---	129c/130C	---	131/130C	---	127n/130C	---	128n/130C	---	129n/130C	---
1	5	Pavir.Ia03665.1.p|PACid:30210947	Pavir.Ia03665.1.p|PACid:30210947	1927	84329	109	109	14	14	21.3	5.32	534117	1	0	0	619.626	2474.47	4	2474.47	0.0017	1	26.76	17	30	0.0054	R	IINEPTAAAIAYGLDKK	A					File4255 Spectrum329280 scans: 33112	126/130C	---	127c/130C	---	128c/130C	---	129c/130C	---	131/130C	---	127n/130C	---	128n/130C	---	129n/130C	---
1	5	Pavir.Ia03665.1.p|PACid:30210947	Pavir.Ia03665.1.p|PACid:30210947	1927	84329	109	109	14	14	21.3	5.32	534125	1	0	0	825.832	2474.47	3	2474.47	0.0021	1	38.2	30	30	0.0085	R	IINEPTAAAIAYGLDKK	A					File4253 Spectrum245541 scans: 35729	126/130C	---	127c/130C	---	128c/130C	---	129c/130C	---	131/130C	---	127n/130C	---	128n/130C	---	129n/130C	---
1	5	Pavir.Ia03665.1.p|PACid:30210947	Pavir.Ia03665.1.p|PACid:30210947	1927	84329	109	109	14	14	21.3	5.32	534129	1	0	0	619.626	2474.47	4	2474.47	0.0022	1	27.8	14	30	0.0025	R	IINEPTAAAIAYGLDKK	A					File4254 Spectrum288468 scans: 35663	126/130C	---	127c/130C	---	128c/130C	---	129c/130C	---	131/130C	---	127n/130C	---	128n/130C	---	129n/130C	---
1	5	Pavir.Ia03665.1.p|PACid:30210947	Pavir.Ia03665.1.p|PACid:30210947	1927	84329	109	109	14	14	21.3	5.32	534134	1	0	0	825.832	2474.47	3	2474.47	0.0023	1	55.72		30	0.00015	R	IINEPTAAAIAYGLDKK	A					File4253 Spectrum245319 scans: 35473	126/130C	---	127c/130C	---	128c/130C	---	129c/130C	---	131/130C	---	127n/130C	---	128n/130C	---	129n/130C	---
1	5	Pavir.Ia03665.1.p|PACid:30210947	Pavir.Ia03665.1.p|PACid:30210947	1927	84329	109	109	14	14	21.3	5.32	534135	1	0	0	825.832	2474.47	3	2474.47	0.0023	1	48.75		30	0.00076	R	IINEPTAAAIAYGLDKK	A					File4253 Spectrum244866 scans: 34957	126/130C	---	127c/130C	---	128c/130C	---	129c/130C	---	131/130C	---	127n/130C	---	128n/130C	---	129n/130C	---
1	5	Pavir.Ia03665.1.p|PACid:30210947	Pavir.Ia03665.1.p|PACid:30210947	1927	84329	109	109	14	14	21.3	5.32	534136	1	0	0	825.832	2474.47	3	2474.47	0.0023	1	47.69		30	0.00098	R	IINEPTAAAIAYGLDKK	A					File4254 Spectrum288171 scans: 35326	126/130C	---	127c/130C	---	128c/130C	---	129c/130C	---	131/130C	---	127n/130C	---	128n/130C	---	129n/130C	---
1	5	Pavir.Ia03665.1.p|PACid:30210947	Pavir.Ia03665.1.p|PACid:30210947	1927	84329	109	109	14	14	21.3	5.32	534143	1	0	0	825.832	2474.47	3	2474.47	0.0024	1	39.05	26	30	0.0027	R	IINEPTAAAIAYGLDKK	A					File4253 Spectrum244174 scans: 34172	126/130C	---	127c/130C	---	128c/130C	---	129c/130C	---	131/130C	---	127n/130C	---	128n/130C	---	129n/130C	---
1	5	Pavir.Ia03665.1.p|PACid:30210947	Pavir.Ia03665.1.p|PACid:30210947	1927	84329	109	109	14	14	21.3	5.32	534147	1	0	0	825.832	2474.47	3	2474.47	0.0026	1	37.02	23	30	0.0023	R	IINEPTAAAIAYGLDKK	A					File4254 Spectrum288415 scans: 35603	126/130C	---	127c/130C	---	128c/130C	---	129c/130C	---	131/130C	---	127n/130C	---	128n/130C	---	129n/130C	---
1	5	Pavir.Ia03665.1.p|PACid:30210947	Pavir.Ia03665.1.p|PACid:30210947	1927	84329	109	109	14	14	21.3	5.32	534148	1	0	0	825.832	2474.47	3	2474.47	0.0026	1	48.89		30	0.00074	R	IINEPTAAAIAYGLDKK	A					File4254 Spectrum287940 scans: 35065	126/130C	---	127c/130C	---	128c/130C	---	129c/130C	---	131/130C	---	127n/130C	---	128n/130C	---	129n/130C	---
1	5	Pavir.Ia03665.1.p|PACid:30210947	Pavir.Ia03665.1.p|PACid:30210947	1927	84329	109	109	14	14	21.3	5.32	534149	1	0	0	825.832	2474.47	3	2474.47	0.0026	1	43.76	25	30	0.00074	R	IINEPTAAAIAYGLDKK	A					File4254 Spectrum287241 scans: 34274	126/130C	---	127c/130C	---	128c/130C	---	129c/130C	---	131/130C	---	127n/130C	---	128n/130C	---	129n/130C	---
1	5	Pavir.Ia03665.1.p|PACid:30210947	Pavir.Ia03665.1.p|PACid:30210947	1927	84329	109	109	14	14	21.3	5.32	534155	1	0	0	619.626	2474.47	4	2474.47	0.0029	1	29.28	14	30	0.0018	R	IINEPTAAAIAYGLDKK	A					File4253 Spectrum246194 scans: 36483	126/130C	---	127c/130C	---	128c/130C	---	129c/130C	---	131/130C	---	127n/130C	---	128n/130C	---	129n/130C	---
1	5	Pavir.Ia03665.1.p|PACid:30210947	Pavir.Ia03665.1.p|PACid:30210947	1927	84329	109	109	14	14	21.3	5.32	534161	1	0	0	825.832	2474.47	3	2474.47	0.003	1	45.42		30	0.0016	R	IINEPTAAAIAYGLDKK	A					File4254 Spectrum288642 scans: 35862	126/130C	---	127c/130C	---	128c/130C	---	129c/130C	---	131/130C	---	127n/130C	---	128n/130C	---	129n/130C	---
1	5	Pavir.Ia03665.1.p|PACid:30210947	Pavir.Ia03665.1.p|PACid:30210947	1927	84329	109	109	14	14	21.3	5.32	534162	1	0	0	825.832	2474.47	3	2474.47	0.003	1	50.42	28	30	0.00033	R	IINEPTAAAIAYGLDKK	A					File4253 Spectrum244640 scans: 34701	126/130C	---	127c/130C	---	128c/130C	---	129c/130C	---	131/130C	---	127n/130C	---	128n/130C	---	129n/130C	---
1	5	Pavir.Ia03665.1.p|PACid:30210947	Pavir.Ia03665.1.p|PACid:30210947	1927	84329	109	109	14	14	21.3	5.32	534166	1	0	0	619.626	2474.47	4	2474.47	0.0032	1	25.78	14	30	0.0038	R	IINEPTAAAIAYGLDKK	A					File4254 Spectrum288242 scans: 35406	126/130C	---	127c/130C	---	128c/130C	---	129c/130C	---	131/130C	---	127n/130C	---	128n/130C	---	129n/130C	---
1	5	Pavir.Ia03665.1.p|PACid:30210947	Pavir.Ia03665.1.p|PACid:30210947	1927	84329	109	109	14	14	21.3	5.32	534167	1	0	0	619.626	2474.47	4	2474.47	0.0032	1	27.05	15	30	0.0032	R	IINEPTAAAIAYGLDKK	A					File4254 Spectrum288011 scans: 35144	126/130C	---	127c/130C	---	128c/130C	---	129c/130C	---	131/130C	---	127n/130C	---	128n/130C	---	129n/130C	---
1	5	Pavir.Ia03665.1.p|PACid:30210947	Pavir.Ia03665.1.p|PACid:30210947	1927	84329	109	109	14	14	21.3	5.32	534180	1	0	0	619.626	2474.48	4	2474.47	0.0036	1	24	14	30	0.0056	R	IINEPTAAAIAYGLDKK	A					File4254 Spectrum287304 scans: 34345	126/130C	---	127c/130C	---	128c/130C	---	129c/130C	---	131/130C	---	127n/130C	---	128n/130C	---	129n/130C	---
1	5	Pavir.Ia03665.1.p|PACid:30210947	Pavir.Ia03665.1.p|PACid:30210947	1927	84329	109	109	14	14	21.3	5.32	534183	1	0	0	825.832	2474.48	3	2474.47	0.0037	1	40.95	26	30	0.0019	R	IINEPTAAAIAYGLDKK	A					File4253 Spectrum244408 scans: 34438	126/130C	---	127c/130C	---	128c/130C	---	129c/130C	---	131/130C	---	127n/130C	---	128n/130C	---	129n/130C	---
1	5	Pavir.Ia03665.1.p|PACid:30210947	Pavir.Ia03665.1.p|PACid:30210947	1927	84329	109	109	14	14	21.3	5.32	534184	1	0	0	825.832	2474.48	3	2474.47	0.0037	1	49.25		30	0.00066	R	IINEPTAAAIAYGLDKK	A					File4254 Spectrum287713 scans: 34808	126/130C	---	127c/130C	---	128c/130C	---	129c/130C	---	131/130C	---	127n/130C	---	128n/130C	---	129n/130C	---
1	5	Pavir.Ia03665.1.p|PACid:30210947	Pavir.Ia03665.1.p|PACid:30210947	1927	84329	109	109	14	14	21.3	5.32	534185	1	0	0	825.832	2474.48	3	2474.47	0.0037	1	57.11	28	30	7.7e-05	R	IINEPTAAAIAYGLDKK	A					File4253 Spectrum243944 scans: 33911	126/130C	---	127c/130C	---	128c/130C	---	129c/130C	---	131/130C	---	127n/130C	---	128n/130C	---	129n/130C	---
1	5	Pavir.Ia03665.1.p|PACid:30210947	Pavir.Ia03665.1.p|PACid:30210947	1927	84329	109	109	14	14	21.3	5.32	534189	1	0	0	825.832	2474.48	3	2474.47	0.0039	1	48.21	28	30	0.00055	R	IINEPTAAAIAYGLDKK	A					File4254 Spectrum287474 scans: 34538	126/130C	---	127c/130C	---	128c/130C	---	129c/130C	---	131/130C	---	127n/130C	---	128n/130C	---	129n/130C	---
1	5	Pavir.Ia03665.1.p|PACid:30210947	Pavir.Ia03665.1.p|PACid:30210947	1927	84329	109	109	14	14	21.3	5.32	534197	1	0	0	825.833	2474.48	3	2474.47	0.0044	1	40.07	22	30	0.00085	R	IINEPTAAAIAYGLDKK	A					File4255 Spectrum329466 scans: 33316	126/130C	---	127c/130C	---	128c/130C	---	129c/130C	---	131/130C	---	127n/130C	---	128n/130C	---	129n/130C	---
1	5	Pavir.Ia03665.1.p|PACid:30210947	Pavir.Ia03665.1.p|PACid:30210947	1927	84329	109	109	14	14	21.3	5.32	534214	1	0	0	619.627	2474.48	4	2474.47	0.0056	1	25.51	14	30	0.004	R	IINEPTAAAIAYGLDKK	A					File4254 Spectrum287775 scans: 34878	126/130C	---	127c/130C	---	128c/130C	---	129c/130C	---	131/130C	---	127n/130C	---	128n/130C	---	129n/130C	---
1	5	Pavir.Ia03665.1.p|PACid:30210947	Pavir.Ia03665.1.p|PACid:30210947	1927	84329	109	109	14	14	21.3	5.32	534435	1	0	0	826.159	2475.46	3	2475.46	0.0001	1	43.38	28	31	0.0016	R	IINEPTAAAIAYGLDKK	A	Deamidated (NQ)	0.00100000000000000.0			File4250 Spectrum115108 scans: 34357	126/130C	---	127c/130C	---	128c/130C	---	129c/130C	---	131/130C	---	127n/130C	---	128n/130C	---	129n/130C	---
1	5	Pavir.Ia03665.1.p|PACid:30210947	Pavir.Ia03665.1.p|PACid:30210947	1927	84329	109	109	14	14	21.3	5.32	534436	1	0	0	619.871	2475.46	4	2475.46	0.0008	1	27.43	14	31	0.0027	R	IINEPTAAAIAYGLDKK	A	Deamidated (NQ)	0.00100000000000000.0			File4249 Spectrum71046 scans: 34495	126/130C	---	127c/130C	---	128c/130C	---	129c/130C	---	131/130C	---	127n/130C	---	128n/130C	---	129n/130C	---
1	5	Pavir.Ia03665.1.p|PACid:30210947	Pavir.Ia03665.1.p|PACid:30210947	1927	84329	109	109	14	14	21.3	5.32	534437	1	0	0	826.16	2475.46	3	2475.46	0.0013	1	46.13	30	31	0.0014	R	IINEPTAAAIAYGLDKK	A	Deamidated (NQ)	0.00100000000000000.0			File4250 Spectrum115354 scans: 34627	126/130C	---	127c/130C	---	128c/130C	---	129c/130C	---	131/130C	---	127n/130C	---	128n/130C	---	129n/130C	---
1	5	Pavir.Ia03665.1.p|PACid:30210947	Pavir.Ia03665.1.p|PACid:30210947	1927	84329	109	109	14	14	21.3	5.32	534439	1	0	0	826.16	2475.46	3	2475.46	0.0022	1	33.16	21	31	0.0033	R	IINEPTAAAIAYGLDKK	A	Deamidated (NQ)	0.00100000000000000.0			File4250 Spectrum115604 scans: 34903	126/130C	---	127c/130C	---	128c/130C	---	129c/130C	---	131/130C	---	127n/130C	---	128n/130C	---	129n/130C	---
1	5	Pavir.Ia03665.1.p|PACid:30210947	Pavir.Ia03665.1.p|PACid:30210947	1927	84329	109	109	14	14	21.3	5.32	534443	1	0	0	826.161	2475.46	3	2475.46	0.0044	1	38.23	16	31	0.0003	R	IINEPTAAAIAYGLDKK	A	Deamidated (NQ)	0.00100000000000000.0			File4249 Spectrum71133 scans: 34589	126/130C	---	127c/130C	---	128c/130C	---	129c/130C	---	131/130C	---	127n/130C	---	128n/130C	---	129n/130C	---
1	5	Pavir.Ia03665.1.p|PACid:30210947	Pavir.Ia03665.1.p|PACid:30210947	1927	84329	109	109	14	14	21.3	5.32	616749	1	0	0	963.149	2886.42	3	2886.42	0.0007	0	30.1	20	34	0.0052	K	EQVFSTYSDNQPGVLIQVYEGER	T					File4264 Spectrum699989 scans: 35457	126/130C	---	127c/130C	---	128c/130C	---	129c/130C	---	131/130C	---	127n/130C	---	128n/130C	---	129n/130C	---
1	5	Pavir.Ia03665.1.p|PACid:30210947	Pavir.Ia03665.1.p|PACid:30210947	1927	84329	109	109	14	14	21.3	5.32	616753	1	0	0	963.149	2886.42	3	2886.42	0.0009	0	38.63	20	34	0.00074	K	EQVFSTYSDNQPGVLIQVYEGER	T					File4250 Spectrum115754 scans: 35068	126/130C	---	127c/130C	---	128c/130C	---	129c/130C	---	131/130C	---	127n/130C	---	128n/130C	---	129n/130C	---
1	5	Pavir.Ia03665.1.p|PACid:30210947	Pavir.Ia03665.1.p|PACid:30210947	1927	84329	109	109	14	14	21.3	5.32	616764	1	0	0	963.149	2886.43	3	2886.42	0.0025	0	32.6	18	34	0.0021	K	EQVFSTYSDNQPGVLIQVYEGER	T					File4264 Spectrum699745 scans: 35190	126/130C	---	127c/130C	---	128c/130C	---	129c/130C	---	131/130C	---	127n/130C	---	128n/130C	---	129n/130C	---
1	5	Pavir.Ia03665.1.p|PACid:30210947	Pavir.Ia03665.1.p|PACid:30210947	1927	84329	109	109	14	14	21.3	5.32	616767	1	0	0	963.149	2886.43	3	2886.42	0.0028	0	54.68	20	34	2.1e-05	K	EQVFSTYSDNQPGVLIQVYEGER	T					File4249 Spectrum71134 scans: 34591	126/130C	---	127c/130C	---	128c/130C	---	129c/130C	---	131/130C	---	127n/130C	---	128n/130C	---	129n/130C	---
1	5	Pavir.Ia03665.1.p|PACid:30210947	Pavir.Ia03665.1.p|PACid:30210947	1927	84329	109	109	14	14	21.3	5.32	616768	1	0	0	963.149	2886.43	3	2886.42	0.0029	0	25.23	17	34	0.0094	K	EQVFSTYSDNQPGVLIQVYEGER	T					File4264 Spectrum700226 scans: 35717	126/130C	---	127c/130C	---	128c/130C	---	129c/130C	---	131/130C	---	127n/130C	---	128n/130C	---	129n/130C	---
1	5	Pavir.Ia03665.1.p|PACid:30210947	Pavir.Ia03665.1.p|PACid:30210947	1927	84329	109	109	14	14	21.3	5.32	616771	1	0	0	963.15	2886.43	3	2886.42	0.0031	0	44.13	20	34	0.00022	K	EQVFSTYSDNQPGVLIQVYEGER	T					File4264 Spectrum699510 scans: 34931	126/130C	---	127c/130C	---	128c/130C	---	129c/130C	---	131/130C	---	127n/130C	---	128n/130C	---	129n/130C	---
1	5	Pavir.Ia03665.1.p|PACid:30210947	Pavir.Ia03665.1.p|PACid:30210947	1927	84329	109	109	14	14	21.3	5.32	616773	1	0	0	722.614	2886.43	4	2886.42	0.0033	0	28.04	19	34	0.0064	K	EQVFSTYSDNQPGVLIQVYEGER	T					File4249 Spectrum71342 scans: 34819	126/130C	---	127c/130C	---	128c/130C	---	129c/130C	---	131/130C	---	127n/130C	---	128n/130C	---	129n/130C	---
1	5	Pavir.Ia03665.1.p|PACid:30210947	Pavir.Ia03665.1.p|PACid:30210947	1927	84329	109	109	14	14	21.3	5.32	616779	1	0	0	963.15	2886.43	3	2886.42	0.0044	0	34.38	16	34	0.00082	K	EQVFSTYSDNQPGVLIQVYEGER	T					File4249 Spectrum71375 scans: 34855	126/130C	---	127c/130C	---	128c/130C	---	129c/130C	---	131/130C	---	127n/130C	---	128n/130C	---	129n/130C	---
1	5	Pavir.Ia03665.1.p|PACid:30210947	Pavir.Ia03665.1.p|PACid:30210947	1927	84329	109	109	14	14	21.3	5.32	617052	1	0	0	963.478	2887.41	3	2887.41	0.0038	0	31.85	20	34	0.0036	K	EQVFSTYSDNQPGVLIQVYEGER	T	Deamidated (NQ)	0.00000000001000000000000.0			File4261 Spectrum569091 scans: 36844	126/130C	---	127c/130C	---	128c/130C	---	129c/130C	---	131/130C	---	127n/130C	---	128n/130C	---	129n/130C	---
1	5	Pavir.Ia03665.1.p|PACid:30210947	Pavir.Ia03665.1.p|PACid:30210947	1927	84329	109	109	14	14	21.3	5.32	661647	1	0	0	811.928	3243.68	4	3243.68	0.0006	1	45.04	21	35	0.00021	K	KEQVFSTYSDNQPGVLIQVYEGER	T					File4260 Spectrum520976 scans: 32564	126/130C	---	127c/130C	---	128c/130C	---	129c/130C	---	131/130C	---	127n/130C	---	128n/130C	---	129n/130C	---
1	5	Pavir.Ia03665.1.p|PACid:30210947	Pavir.Ia03665.1.p|PACid:30210947	1927	84329	109	109	14	14	21.3	5.32	661650	1	0	0	811.928	3243.68	4	3243.68	0.0023	1	41.33	19	35	0.00037	K	KEQVFSTYSDNQPGVLIQVYEGER	T					File4260 Spectrum520934 scans: 32518	126/130C	---	127c/130C	---	128c/130C	---	129c/130C	---	131/130C	---	127n/130C	---	128n/130C	---	129n/130C	---
1	5	Pavir.Ia03665.1.p|PACid:30210947	Pavir.Ia03665.1.p|PACid:30210947	1927	84329	109	109	14	14	21.3	5.32	661720	1	0	0	812.179	3244.69	4	3244.67	0.0205	1	34.35	20	35	0.0021	K	KEQVFSTYSDNQPGVLIQVYEGER	T	Deamidated (NQ)	0.000000000000000001000000.0			File4261 Spectrum565700 scans: 33100	126/130C	---	127c/130C	---	128c/130C	---	129c/130C	---	131/130C	---	127n/130C	---	128n/130C	---	129n/130C	---
1	6	Pavir.J03393.1.p|PACid:30196500	Pavir.J03393.1.p|PACid:30196500	1731	87951	98	98	22	22	30.4	5.08	67704	1	0	0	609.831	1217.65	2	1217.65	0.0013	0	56.97		31	0.00015	R	LSQEEIDR	M					File4254 Spectrum265912 scans: 10849	126/130C	---	127c/130C	---	128c/130C	---	129c/130C	---	131/130C	---	127n/130C	---	128n/130C	---	129n/130C	---
1	6	Pavir.J03393.1.p|PACid:30196500	Pavir.J03393.1.p|PACid:30196500	1731	87951	98	98	22	22	30.4	5.08	87615	1	0	0	638.898	1275.78	2	1275.78	0.0013	0	34.02	25	32	0.0071	K	ITITNEK	G					File4263 Spectrum637978 scans: 15340	126/130C	---	127c/130C	---	128c/130C	---	129c/130C	---	131/130C	---	127n/130C	---	128n/130C	---	129n/130C	---
1	6	Pavir.J03393.1.p|PACid:30196500	Pavir.J03393.1.p|PACid:30196500	1731	87951	98	98	22	22	30.4	5.08	89944	1	0	0	428.241	1281.7	3	1281.7	0.0009	0	33.28	22	31	0.0044	R	ALSNQHQVR	V	Deamidated (NQ)	0.000100000.0			File4258 Spectrum409024 scans: 4781	126/130C	---	127c/130C	---	128c/130C	---	129c/130C	---	131/130C	---	127n/130C	---	128n/130C	---	129n/130C	---
1	6	Pavir.J03393.1.p|PACid:30196500	Pavir.J03393.1.p|PACid:30196500	1731	87951	98	98	22	22	30.4	5.08	126929	1	0	1	692.909	1383.8	2	1383.8	0.0004	0	37.25	24	31	0.0029	K	DAGVIAGLNVAR	I					File4255 Spectrum318449 scans: 21286	126/130C	0.781	127c/130C	1.032	128c/130C	0.935	129c/130C	1.606	131/130C	1.392	127n/130C	0.974	128n/130C	0.909	129n/130C	0.996
1	6	Pavir.J03393.1.p|PACid:30196500	Pavir.J03393.1.p|PACid:30196500	1731	87951	98	98	22	22	30.4	5.08	126933	1	0	1	692.909	1383.8	2	1383.8	0.0006	0	72.26		31	3.8e-06	K	DAGVIAGLNVAR	I					File4254 Spectrum275718 scans: 21577	126/130C	0.833	127c/130C	1.59	128c/130C	0.7	129c/130C	3.704	131/130C	2.084	127n/130C	1.331	128n/130C	0.736	129n/130C	1.009
1	6	Pavir.J03393.1.p|PACid:30196500	Pavir.J03393.1.p|PACid:30196500	1731	87951	98	98	22	22	30.4	5.08	126934	1	0	1	462.276	1383.8	3	1383.8	0.0009	0	46.87		30	0.0012	K	DAGVIAGLNVAR	I					File4254 Spectrum275485 scans: 21322	126/130C	1.62	127c/130C	1.69	128c/130C	0.723	129c/130C	2.741	131/130C	1.049	127n/130C	1.386	128n/130C	0.756	129n/130C	1.005
1	6	Pavir.J03393.1.p|PACid:30196500	Pavir.J03393.1.p|PACid:30196500	1731	87951	98	98	22	22	30.4	5.08	126935	1	0	1	692.91	1383.8	2	1383.8	0.0011	0	74.8		30	1.9e-06	K	DAGVIAGLNVAR	I					File4255 Spectrum318172 scans: 20986	126/130C	0.566	127c/130C	1.368	128c/130C	0.27	129c/130C	4.097	131/130C	1.841	127n/130C	1.033	128n/130C	0.243	129n/130C	0.704
1	6	Pavir.J03393.1.p|PACid:30196500	Pavir.J03393.1.p|PACid:30196500	1731	87951	98	98	22	22	30.4	5.08	126936	1	0	1	692.91	1383.8	2	1383.8	0.0011	0	72.97		30	3e-06	K	DAGVIAGLNVAR	I					File4254 Spectrum275472 scans: 21308	126/130C	1.041	127c/130C	1.771	128c/130C	0.482	129c/130C	4.577	131/130C	1.979	127n/130C	1.43	128n/130C	0.558	129n/130C	0.962
1	6	Pavir.J03393.1.p|PACid:30196500	Pavir.J03393.1.p|PACid:30196500	1731	87951	98	98	22	22	30.4	5.08	126939	1	0	1	462.276	1383.81	3	1383.8	0.0018	0	41.66		30	0.0042	K	DAGVIAGLNVAR	I					File4255 Spectrum318124 scans: 20934	126/130C	-2461.01	127c/130C	-1358.16	128c/130C	218.005	129c/130C	-1331.59	131/130C	-0.056	127n/130C	-1770.41	128n/130C	257.286	129n/130C	-22.026
1	6	Pavir.J03393.1.p|PACid:30196500	Pavir.J03393.1.p|PACid:30196500	1731	87951	98	98	22	22	30.4	5.08	132173	1	0	1	699.901	1397.79	2	1397.79	0.0006	0	27.5	19	31	0.0072	K	FDLSGIPPAPR	G					File4262 Spectrum604146 scans: 26460	126/130C	0.861	127c/130C	1.059	128c/130C	0.683	129c/130C	2	131/130C	1.266	127n/130C	1.276	128n/130C	0.656	129n/130C	1.063
1	6	Pavir.J03393.1.p|PACid:30196500	Pavir.J03393.1.p|PACid:30196500	1731	87951	98	98	22	22	30.4	5.08	142621	1	0	0	711.39	1420.76	2	1420.76	0.0011	0	52.19		32	0.00053	K	AMEDAGLEK	S					File4261 Spectrum551094 scans: 17174	126/130C	---	127c/130C	---	128c/130C	---	129c/130C	---	131/130C	---	127n/130C	---	128n/130C	---	129n/130C	---
1	6	Pavir.J03393.1.p|PACid:30196500	Pavir.J03393.1.p|PACid:30196500	1731	87951	98	98	22	22	30.4	5.08	142622	1	0	0	711.39	1420.77	2	1420.76	0.0013	0	44.31	28	32	0.0015	K	AMEDAGLEK	S					File4262 Spectrum594969 scans: 16473	126/130C	---	127c/130C	---	128c/130C	---	129c/130C	---	131/130C	---	127n/130C	---	128n/130C	---	129n/130C	---
1	6	Pavir.J03393.1.p|PACid:30196500	Pavir.J03393.1.p|PACid:30196500	1731	87951	98	98	22	22	30.4	5.08	146555	1	0	0	716.392	1430.77	2	1430.77	0.001	1	40.6		31	0.0067	K	GRLSQEEIDR	M					File4253 Spectrum218966 scans: 6269	126/130C	---	127c/130C	---	128c/130C	---	129c/130C	---	131/130C	---	127n/130C	---	128n/130C	---	129n/130C	---
1	6	Pavir.J03393.1.p|PACid:30196500	Pavir.J03393.1.p|PACid:30196500	1731	87951	98	98	22	22	30.4	5.08	149715	1	0	0	719.387	1436.76	2	1436.76	0.0005	0	28.64	20	31	0.0083	K	AMEDAGLEK	S	Oxidation (M)	0.030000000.0			File4262 Spectrum590643 scans: 11763	126/130C	---	127c/130C	---	128c/130C	---	129c/130C	---	131/130C	---	127n/130C	---	128n/130C	---	129n/130C	---
1	6	Pavir.J03393.1.p|PACid:30196500	Pavir.J03393.1.p|PACid:30196500	1731	87951	98	98	22	22	30.4	5.08	187968	1	0	0	763.397	1524.78	2	1524.78	0.0014	0	38.96	24	31	0.0019	R	FEELNNDLFR	K					File4253 Spectrum241431 scans: 31109	126/130C	---	127c/130C	---	128c/130C	---	129c/130C	---	131/130C	---	127n/130C	---	128n/130C	---	129n/130C	---
1	6	Pavir.J03393.1.p|PACid:30196500	Pavir.J03393.1.p|PACid:30196500	1731	87951	98	98	22	22	30.4	5.08	187971	1	0	0	763.397	1524.78	2	1524.78	0.002	0	35.64	24	31	0.0038	R	FEELNNDLFR	K					File4253 Spectrum241199 scans: 30852	126/130C	---	127c/130C	---	128c/130C	---	129c/130C	---	131/130C	---	127n/130C	---	128n/130C	---	129n/130C	---
1	6	Pavir.J03393.1.p|PACid:30196500	Pavir.J03393.1.p|PACid:30196500	1731	87951	98	98	22	22	30.4	5.08	244441	1	0	0	827.915	1653.81	2	1653.81	0.001	0	39.77	24	30	0.0013	R	EAEEFAEEDK	K					File4262 Spectrum594843 scans: 16336	126/130C	---	127c/130C	---	128c/130C	---	129c/130C	---	131/130C	---	127n/130C	---	128n/130C	---	129n/130C	---
1	6	Pavir.J03393.1.p|PACid:30196500	Pavir.J03393.1.p|PACid:30196500	1731	87951	98	98	22	22	30.4	5.08	279577	1	0	0	862.998	1723.98	2	1723.98	0.0026	0	56.76	18	33	7.2e-06	K	SQIHEIVLVGGSTR	I					File4259 Spectrum465246 scans: 18676	126/130C	---	127c/130C	---	128c/130C	---	129c/130C	---	131/130C	---	127n/130C	---	128n/130C	---	129n/130C	---
1	6	Pavir.J03393.1.p|PACid:30196500	Pavir.J03393.1.p|PACid:30196500	1731	87951	98	98	22	22	30.4	5.08	284939	1	0	0	869.455	1736.9	2	1736.89	0.0017	0	33.97	23	32	0.0043	R	ITPSWVAFTDSER	L					File4263 Spectrum652624 scans: 31386	126/130C	---	127c/130C	---	128c/130C	---	129c/130C	---	131/130C	---	127n/130C	---	128n/130C	---	129n/130C	---
1	6	Pavir.J03393.1.p|PACid:30196500	Pavir.J03393.1.p|PACid:30196500	1731	87951	98	98	22	22	30.4	5.08	284940	1	0	0	869.455	1736.9	2	1736.89	0.0017	0	63.97	23	32	4.5e-06	R	ITPSWVAFTDSER	L					File4263 Spectrum652390 scans: 31127	126/130C	---	127c/130C	---	128c/130C	---	129c/130C	---	131/130C	---	127n/130C	---	128n/130C	---	129n/130C	---
1	6	Pavir.J03393.1.p|PACid:30196500	Pavir.J03393.1.p|PACid:30196500	1731	87951	98	98	22	22	30.4	5.08	291872	1	0	0	584.979	1751.92	3	1751.92	-0.0004	1	22.23	14	32	0.0085	R	ARFEELNNDLFR	K					File4253 Spectrum235891 scans: 24990	126/130C	---	127c/130C	---	128c/130C	---	129c/130C	---	131/130C	---	127n/130C	---	128n/130C	---	129n/130C	---
1	6	Pavir.J03393.1.p|PACid:30196500	Pavir.J03393.1.p|PACid:30196500	1731	87951	98	98	22	22	30.4	5.08	291884	1	0	0	584.98	1751.92	3	1751.92	0.002	1	39.84	21	32	0.00078	R	ARFEELNNDLFR	K					File4253 Spectrum236130 scans: 25256	126/130C	---	127c/130C	---	128c/130C	---	129c/130C	---	131/130C	---	127n/130C	---	128n/130C	---	129n/130C	---
1	6	Pavir.J03393.1.p|PACid:30196500	Pavir.J03393.1.p|PACid:30196500	1731	87951	98	98	22	22	30.4	5.08	292593	1	0	0	585.308	1752.9	3	1752.9	0.0009	1	34.78	22	32	0.0029	R	ARFEELNNDLFR	K	Deamidated (NQ)	0.000000100000.0			File4264 Spectrum690574 scans: 25188	126/130C	---	127c/130C	---	128c/130C	---	129c/130C	---	131/130C	---	127n/130C	---	128n/130C	---	129n/130C	---
1	6	Pavir.J03393.1.p|PACid:30196500	Pavir.J03393.1.p|PACid:30196500	1731	87951	98	98	22	22	30.4	5.08	292600	1	0	0	585.308	1752.9	3	1752.9	0.002	1	32.12	21	32	0.0047	R	ARFEELNNDLFR	K	Deamidated (NQ)	0.000000010000.0			File4263 Spectrum646678 scans: 24842	126/130C	---	127c/130C	---	128c/130C	---	129c/130C	---	131/130C	---	127n/130C	---	128n/130C	---	129n/130C	---
1	6	Pavir.J03393.1.p|PACid:30196500	Pavir.J03393.1.p|PACid:30196500	1731	87951	98	98	22	22	30.4	5.08	297728	1	0	0	883.461	1764.91	2	1764.91	0.0011	0	43.49	17	32	0.00012	K	NGHVEIIANDQGNR	I					File4248 Spectrum6274 scans: 8742	126/130C	---	127c/130C	---	128c/130C	---	129c/130C	---	131/130C	---	127n/130C	---	128n/130C	---	129n/130C	---
1	6	Pavir.J03393.1.p|PACid:30196500	Pavir.J03393.1.p|PACid:30196500	1731	87951	98	98	22	22	30.4	5.08	297731	1	0	0	589.31	1764.91	3	1764.91	0.0015	0	42.29	18	32	0.0002	K	NGHVEIIANDQGNR	I					File4248 Spectrum6271 scans: 8739	126/130C	---	127c/130C	---	128c/130C	---	129c/130C	---	131/130C	---	127n/130C	---	128n/130C	---	129n/130C	---
1	6	Pavir.J03393.1.p|PACid:30196500	Pavir.J03393.1.p|PACid:30196500	1731	87951	98	98	22	22	30.4	5.08	297733	1	0	0	589.31	1764.91	3	1764.91	0.0019	0	41.88	17	32	0.0002	K	NGHVEIIANDQGNR	I					File4248 Spectrum6037 scans: 8478	126/130C	---	127c/130C	---	128c/130C	---	129c/130C	---	131/130C	---	127n/130C	---	128n/130C	---	129n/130C	---
1	6	Pavir.J03393.1.p|PACid:30196500	Pavir.J03393.1.p|PACid:30196500	1731	87951	98	98	22	22	30.4	5.08	297740	1	0	0	883.462	1764.91	2	1764.91	0.0031	0	31.95	16	32	0.0013	K	NGHVEIIANDQGNR	I					File4248 Spectrum6045 scans: 8486	126/130C	---	127c/130C	---	128c/130C	---	129c/130C	---	131/130C	---	127n/130C	---	128n/130C	---	129n/130C	---
1	6	Pavir.J03393.1.p|PACid:30196500	Pavir.J03393.1.p|PACid:30196500	1731	87951	98	98	22	22	30.4	5.08	298240	1	0	0	589.638	1765.89	3	1765.89	0.0019	0	43.45	22	32	0.00039	K	NGHVEIIANDQGNR	I	Deamidated (NQ)	0.10000000000000.0			File4251 Spectrum136428 scans: 9584	126/130C	---	127c/130C	---	128c/130C	---	129c/130C	---	131/130C	---	127n/130C	---	128n/130C	---	129n/130C	---
1	6	Pavir.J03393.1.p|PACid:30196500	Pavir.J03393.1.p|PACid:30196500	1731	87951	98	98	22	22	30.4	5.08	298244	1	0	0	589.639	1765.89	3	1765.89	0.0027	0	23.89	15	32	0.0081	K	NGHVEIIANDQGNR	I	Deamidated (NQ)	0.00000000000010.0			File4252 Spectrum178518 scans: 8775	126/130C	---	127c/130C	---	128c/130C	---	129c/130C	---	131/130C	---	127n/130C	---	128n/130C	---	129n/130C	---
1	6	Pavir.J03393.1.p|PACid:30196500	Pavir.J03393.1.p|PACid:30196500	1731	87951	98	98	22	22	30.4	5.08	298249	1	0	0	589.639	1765.89	3	1765.89	0.0034	0	28.24	19	32	0.0065	K	NGHVEIIANDQGNR	I	Deamidated (NQ)	0.10000000000000.0			File4250 Spectrum93652 scans: 10949	126/130C	---	127c/130C	---	128c/130C	---	129c/130C	---	131/130C	---	127n/130C	---	128n/130C	---	129n/130C	---
1	6	Pavir.J03393.1.p|PACid:30196500	Pavir.J03393.1.p|PACid:30196500	1731	87951	98	98	22	22	30.4	5.08	298649	1	0	0	589.972	1766.89	3	1766.88	0.0182	0	28.49	17	32	0.0044	K	NGHVEIIANDQGNR	I	2 Deamidated (NQ)	0.10000000100000.0			File4251 Spectrum137600 scans: 10893	126/130C	---	127c/130C	---	128c/130C	---	129c/130C	---	131/130C	---	127n/130C	---	128n/130C	---	129n/130C	---
1	6	Pavir.J03393.1.p|PACid:30196500	Pavir.J03393.1.p|PACid:30196500	1731	87951	98	98	22	22	30.4	5.08	298660	1	0	0	884.455	1766.9	2	1766.88	0.0213	0	22.93	14	32	0.0071	K	NGHVEIIANDQGNR	I	2 Deamidated (NQ)	0.10000000001000.0			File4251 Spectrum136433 scans: 9590	126/130C	---	127c/130C	---	128c/130C	---	129c/130C	---	131/130C	---	127n/130C	---	128n/130C	---	129n/130C	---
1	6	Pavir.J03393.1.p|PACid:30196500	Pavir.J03393.1.p|PACid:30196500	1731	87951	98	98	22	22	30.4	5.08	310370	1	0	0	599.013	1794.02	3	1794.02	0.0014	1	33.21	20	33	0.0026	K	KAMEDAGLEK	S	Oxidation (M)	0.0030000000.0			File4248 Spectrum9093 scans: 11895	126/130C	---	127c/130C	---	128c/130C	---	129c/130C	---	131/130C	---	127n/130C	---	128n/130C	---	129n/130C	---
1	6	Pavir.J03393.1.p|PACid:30196500	Pavir.J03393.1.p|PACid:30196500	1731	87951	98	98	22	22	30.4	5.08	310379	1	0	0	599.014	1794.02	3	1794.02	0.0041	1	22.71	14	33	0.0074	K	KAMEDAGLEK	S	Oxidation (M)	0.0030000000.0			File4255 Spectrum308276 scans: 10148	126/130C	---	127c/130C	---	128c/130C	---	129c/130C	---	131/130C	---	127n/130C	---	128n/130C	---	129n/130C	---
1	6	Pavir.J03393.1.p|PACid:30196500	Pavir.J03393.1.p|PACid:30196500	1731	87951	98	98	22	22	30.4	5.08	337121	1	0	0	931	1859.99	2	1859.99	0.0005	0	40.21	24	33	0.0015	R	NQLETYVYNMK	N					File4261 Spectrum562893 scans: 30026	126/130C	---	127c/130C	---	128c/130C	---	129c/130C	---	131/130C	---	127n/130C	---	128n/130C	---	129n/130C	---
1	6	Pavir.J03393.1.p|PACid:30196500	Pavir.J03393.1.p|PACid:30196500	1731	87951	98	98	22	22	30.4	5.08	337126	1	0	0	931.001	1859.99	2	1859.99	0.0013	0	33.27	23	33	0.0052	R	NQLETYVYNMK	N					File4261 Spectrum563139 scans: 30295	126/130C	---	127c/130C	---	128c/130C	---	129c/130C	---	131/130C	---	127n/130C	---	128n/130C	---	129n/130C	---
1	6	Pavir.J03393.1.p|PACid:30196500	Pavir.J03393.1.p|PACid:30196500	1731	87951	98	98	22	22	30.4	5.08	343754	1	0	0	626.334	1875.98	3	1875.98	-0.0001	0	28.51	18	33	0.0047	R	NQLETYVYNMK	N	Oxidation (M)	0.00000000030.0			File4260 Spectrum512675 scans: 23495	126/130C	---	127c/130C	---	128c/130C	---	129c/130C	---	131/130C	---	127n/130C	---	128n/130C	---	129n/130C	---
1	6	Pavir.J03393.1.p|PACid:30196500	Pavir.J03393.1.p|PACid:30196500	1731	87951	98	98	22	22	30.4	5.08	343768	1	0	0	938.999	1875.98	2	1875.98	0.0019	0	44.13	20	33	0.00023	R	NQLETYVYNMK	N	Oxidation (M)	0.00000000030.0			File4248 Spectrum19193 scans: 22936	126/130C	---	127c/130C	---	128c/130C	---	129c/130C	---	131/130C	---	127n/130C	---	128n/130C	---	129n/130C	---
1	6	Pavir.J03393.1.p|PACid:30196500	Pavir.J03393.1.p|PACid:30196500	1731	87951	98	98	22	22	30.4	5.08	343770	1	0	0	938.999	1875.98	2	1875.98	0.002	0	27.22	19	33	0.0088	R	NQLETYVYNMK	N	Oxidation (M)	0.00000000030.0			File4261 Spectrum557473 scans: 24106	126/130C	---	127c/130C	---	128c/130C	---	129c/130C	---	131/130C	---	127n/130C	---	128n/130C	---	129n/130C	---
1	6	Pavir.J03393.1.p|PACid:30196500	Pavir.J03393.1.p|PACid:30196500	1731	87951	98	98	22	22	30.4	5.08	391797	1	0	0	665.714	1994.12	3	1994.12	0.0032	0	32.92	22	33	0.0048	K	VFSPEEISAMILGK	M	Oxidation (M)	0.00000000030000.0			File4255 Spectrum335785 scans: 40370	126/130C	---	127c/130C	---	128c/130C	---	129c/130C	---	131/130C	---	127n/130C	---	128n/130C	---	129n/130C	---
1	6	Pavir.J03393.1.p|PACid:30196500	Pavir.J03393.1.p|PACid:30196500	1731	87951	98	98	22	22	30.4	5.08	409226	1	0	1	681.41	2041.21	3	2041.2	0.002	1	30.6	18	31	0.0029	R	QATKDAGVIAGLNVAR	I					File4262 Spectrum598652 scans: 20495	126/130C	0.684	127c/130C	0.935	128c/130C	0.556	129c/130C	4.922	131/130C	1.191	127n/130C	0.909	128n/130C	0.5	129n/130C	0.547
1	6	Pavir.J03393.1.p|PACid:30196500	Pavir.J03393.1.p|PACid:30196500	1731	87951	98	98	22	22	30.4	5.08	416918	1	0	0	689.359	2065.06	3	2065.05	0.0015	0	39.08	19	33	0.00057	K	EVEAVCNPIISAVYQR	S	Methylthio (C)	0.0000020000000000.0			File4249 Spectrum75479 scans: 39412	126/130C	---	127c/130C	---	128c/130C	---	129c/130C	---	131/130C	---	127n/130C	---	128n/130C	---	129n/130C	---
1	6	Pavir.J03393.1.p|PACid:30196500	Pavir.J03393.1.p|PACid:30196500	1731	87951	98	98	22	22	30.4	5.08	416923	1	0	0	1033.54	2065.06	2	2065.05	0.0021	0	62.52	23	33	6.5e-06	K	EVEAVCNPIISAVYQR	S	Methylthio (C)	0.0000020000000000.0			File4249 Spectrum75480 scans: 39413	126/130C	---	127c/130C	---	128c/130C	---	129c/130C	---	131/130C	---	127n/130C	---	128n/130C	---	129n/130C	---
1	6	Pavir.J03393.1.p|PACid:30196500	Pavir.J03393.1.p|PACid:30196500	1731	87951	98	98	22	22	30.4	5.08	416925	1	0	0	689.36	2065.06	3	2065.05	0.0028	0	23.11	15	33	0.0094	K	EVEAVCNPIISAVYQR	S	Methylthio (C)	0.0000020000000000.0			File4249 Spectrum75234 scans: 39137	126/130C	---	127c/130C	---	128c/130C	---	129c/130C	---	131/130C	---	127n/130C	---	128n/130C	---	129n/130C	---
1	6	Pavir.J03393.1.p|PACid:30196500	Pavir.J03393.1.p|PACid:30196500	1731	87951	98	98	22	22	30.4	5.08	434546	1	0	0	706.745	2117.21	3	2117.21	0	0	27.74	16	33	0.004	R	IINEPTAAAIAYGLDK	K					File4262 Spectrum613316 scans: 36497	126/130C	---	127c/130C	---	128c/130C	---	129c/130C	---	131/130C	---	127n/130C	---	128n/130C	---	129n/130C	---
1	6	Pavir.J03393.1.p|PACid:30196500	Pavir.J03393.1.p|PACid:30196500	1731	87951	98	98	22	22	30.4	5.08	434552	1	0	0	706.745	2117.21	3	2117.21	0.0009	0	25.13	14	33	0.0044	R	IINEPTAAAIAYGLDK	K					File4263 Spectrum657457 scans: 36836	126/130C	---	127c/130C	---	128c/130C	---	129c/130C	---	131/130C	---	127n/130C	---	128n/130C	---	129n/130C	---
1	6	Pavir.J03393.1.p|PACid:30196500	Pavir.J03393.1.p|PACid:30196500	1731	87951	98	98	22	22	30.4	5.08	434557	1	0	0	1059.62	2117.22	2	2117.21	0.0017	0	89.12	26	33	2.9e-08	R	IINEPTAAAIAYGLDK	K					File4263 Spectrum656566 scans: 35811	126/130C	---	127c/130C	---	128c/130C	---	129c/130C	---	131/130C	---	127n/130C	---	128n/130C	---	129n/130C	---
1	6	Pavir.J03393.1.p|PACid:30196500	Pavir.J03393.1.p|PACid:30196500	1731	87951	98	98	22	22	30.4	5.08	434558	1	0	0	706.746	2117.22	3	2117.21	0.0018	0	28.56	18	33	0.0048	R	IINEPTAAAIAYGLDK	K					File4263 Spectrum657247 scans: 36586	126/130C	---	127c/130C	---	128c/130C	---	129c/130C	---	131/130C	---	127n/130C	---	128n/130C	---	129n/130C	---
1	6	Pavir.J03393.1.p|PACid:30196500	Pavir.J03393.1.p|PACid:30196500	1731	87951	98	98	22	22	30.4	5.08	434563	1	0	0	706.746	2117.22	3	2117.21	0.0021	0	41.05	23	33	0.00084	R	IINEPTAAAIAYGLDK	K					File4262 Spectrum612447 scans: 35535	126/130C	---	127c/130C	---	128c/130C	---	129c/130C	---	131/130C	---	127n/130C	---	128n/130C	---	129n/130C	---
1	6	Pavir.J03393.1.p|PACid:30196500	Pavir.J03393.1.p|PACid:30196500	1731	87951	98	98	22	22	30.4	5.08	434564	1	0	0	706.746	2117.22	3	2117.21	0.0021	0	27.8	17	33	0.005	R	IINEPTAAAIAYGLDK	K					File4264 Spectrum699868 scans: 35324	126/130C	---	127c/130C	---	128c/130C	---	129c/130C	---	131/130C	---	127n/130C	---	128n/130C	---	129n/130C	---
1	6	Pavir.J03393.1.p|PACid:30196500	Pavir.J03393.1.p|PACid:30196500	1731	87951	98	98	22	22	30.4	5.08	434568	1	0	0	706.746	2117.22	3	2117.21	0.0023	0	30.93	22	33	0.007	R	IINEPTAAAIAYGLDK	K					File4263 Spectrum657027 scans: 36335	126/130C	---	127c/130C	---	128c/130C	---	129c/130C	---	131/130C	---	127n/130C	---	128n/130C	---	129n/130C	---
1	6	Pavir.J03393.1.p|PACid:30196500	Pavir.J03393.1.p|PACid:30196500	1731	87951	98	98	22	22	30.4	5.08	434569	1	0	0	706.746	2117.22	3	2117.21	0.0023	0	37.09	21	33	0.0013	R	IINEPTAAAIAYGLDK	K					File4263 Spectrum656808 scans: 36086	126/130C	---	127c/130C	---	128c/130C	---	129c/130C	---	131/130C	---	127n/130C	---	128n/130C	---	129n/130C	---
1	6	Pavir.J03393.1.p|PACid:30196500	Pavir.J03393.1.p|PACid:30196500	1731	87951	98	98	22	22	30.4	5.08	434571	1	0	0	706.746	2117.22	3	2117.21	0.0025	0	36.61	17	33	0.00056	R	IINEPTAAAIAYGLDK	K					File4263 Spectrum656356 scans: 35571	126/130C	---	127c/130C	---	128c/130C	---	129c/130C	---	131/130C	---	127n/130C	---	128n/130C	---	129n/130C	---
1	6	Pavir.J03393.1.p|PACid:30196500	Pavir.J03393.1.p|PACid:30196500	1731	87951	98	98	22	22	30.4	5.08	434580	1	0	0	1059.62	2117.22	2	2117.21	0.0039	0	55.29	27	33	7.5e-05	R	IINEPTAAAIAYGLDK	K					File4262 Spectrum612488 scans: 35580	126/130C	---	127c/130C	---	128c/130C	---	129c/130C	---	131/130C	---	127n/130C	---	128n/130C	---	129n/130C	---
1	6	Pavir.J03393.1.p|PACid:30196500	Pavir.J03393.1.p|PACid:30196500	1731	87951	98	98	22	22	30.4	5.08	434581	1	0	0	706.746	2117.22	3	2117.21	0.004	0	36.39	18	33	0.00079	R	IINEPTAAAIAYGLDK	K					File4263 Spectrum656581 scans: 35828	126/130C	---	127c/130C	---	128c/130C	---	129c/130C	---	131/130C	---	127n/130C	---	128n/130C	---	129n/130C	---
1	6	Pavir.J03393.1.p|PACid:30196500	Pavir.J03393.1.p|PACid:30196500	1731	87951	98	98	22	22	30.4	5.08	434582	1	0	0	706.746	2117.22	3	2117.21	0.004	0	35.95	16	33	0.00054	R	IINEPTAAAIAYGLDK	K					File4249 Spectrum71622 scans: 35126	126/130C	---	127c/130C	---	128c/130C	---	129c/130C	---	131/130C	---	127n/130C	---	128n/130C	---	129n/130C	---
1	6	Pavir.J03393.1.p|PACid:30196500	Pavir.J03393.1.p|PACid:30196500	1731	87951	98	98	22	22	30.4	5.08	434587	1	0	0	1059.62	2117.22	2	2117.21	0.0061	0	42.64	26	33	0.0011	R	IINEPTAAAIAYGLDK	K					File4262 Spectrum612243 scans: 35310	126/130C	---	127c/130C	---	128c/130C	---	129c/130C	---	131/130C	---	127n/130C	---	128n/130C	---	129n/130C	---
1	6	Pavir.J03393.1.p|PACid:30196500	Pavir.J03393.1.p|PACid:30196500	1731	87951	98	98	22	22	30.4	5.08	435740	1	0	0	1061.56	2121.11	2	2121.11	-0.0004	0	38.1	24	33	0.002	K	INDAVVTVPAYFNDAQR	Q					File4248 Spectrum25562 scans: 29916	126/130C	---	127c/130C	---	128c/130C	---	129c/130C	---	131/130C	---	127n/130C	---	128n/130C	---	129n/130C	---
1	6	Pavir.J03393.1.p|PACid:30196500	Pavir.J03393.1.p|PACid:30196500	1731	87951	98	98	22	22	30.4	5.08	435746	1	0	0	708.043	2121.11	3	2121.11	0.0017	0	28.33	21	33	0.0093	K	INDAVVTVPAYFNDAQR	Q					File4248 Spectrum25268 scans: 29590	126/130C	---	127c/130C	---	128c/130C	---	129c/130C	---	131/130C	---	127n/130C	---	128n/130C	---	129n/130C	---
1	6	Pavir.J03393.1.p|PACid:30196500	Pavir.J03393.1.p|PACid:30196500	1731	87951	98	98	22	22	30.4	5.08	435747	1	0	0	1061.56	2121.11	2	2121.11	0.0018	0	70.92	26	33	1.8e-06	K	INDAVVTVPAYFNDAQR	Q					File4248 Spectrum25325 scans: 29654	126/130C	---	127c/130C	---	128c/130C	---	129c/130C	---	131/130C	---	127n/130C	---	128n/130C	---	129n/130C	---
1	6	Pavir.J03393.1.p|PACid:30196500	Pavir.J03393.1.p|PACid:30196500	1731	87951	98	98	22	22	30.4	5.08	435749	1	0	0	708.043	2121.11	3	2121.11	0.002	0	31.76	16	33	0.0014	K	INDAVVTVPAYFNDAQR	Q					File4257 Spectrum389217 scans: 30791	126/130C	---	127c/130C	---	128c/130C	---	129c/130C	---	131/130C	---	127n/130C	---	128n/130C	---	129n/130C	---
1	6	Pavir.J03393.1.p|PACid:30196500	Pavir.J03393.1.p|PACid:30196500	1731	87951	98	98	22	22	30.4	5.08	435750	1	0	0	708.043	2121.11	3	2121.11	0.002	0	36.89	22	33	0.0017	K	INDAVVTVPAYFNDAQR	Q					File4248 Spectrum25502 scans: 29850	126/130C	---	127c/130C	---	128c/130C	---	129c/130C	---	131/130C	---	127n/130C	---	128n/130C	---	129n/130C	---
1	6	Pavir.J03393.1.p|PACid:30196500	Pavir.J03393.1.p|PACid:30196500	1731	87951	98	98	22	22	30.4	5.08	435751	1	0	0	1061.56	2121.11	2	2121.11	0.0025	0	54.11	25	33	6.4e-05	K	INDAVVTVPAYFNDAQR	Q					File4257 Spectrum389228 scans: 30803	126/130C	---	127c/130C	---	128c/130C	---	129c/130C	---	131/130C	---	127n/130C	---	128n/130C	---	129n/130C	---
1	6	Pavir.J03393.1.p|PACid:30196500	Pavir.J03393.1.p|PACid:30196500	1731	87951	98	98	22	22	30.4	5.08	436083	1	0	0	708.371	2122.09	3	2122.09	0.0017	0	33.04	19	33	0.0024	K	INDAVVTVPAYFNDAQR	Q	Deamidated (NQ)	0.00000000000010000.0			File4253 Spectrum241165 scans: 30814	126/130C	---	127c/130C	---	128c/130C	---	129c/130C	---	131/130C	---	127n/130C	---	128n/130C	---	129n/130C	---
1	6	Pavir.J03393.1.p|PACid:30196500	Pavir.J03393.1.p|PACid:30196500	1731	87951	98	98	22	22	30.4	5.08	534108	1	0	0	825.832	2474.47	3	2474.47	0.0013	1	43.98		30	0.0023	R	IINEPTAAAIAYGLDKK	G					File4253 Spectrum245096 scans: 35218	126/130C	---	127c/130C	---	128c/130C	---	129c/130C	---	131/130C	---	127n/130C	---	128n/130C	---	129n/130C	---
1	6	Pavir.J03393.1.p|PACid:30196500	Pavir.J03393.1.p|PACid:30196500	1731	87951	98	98	22	22	30.4	5.08	534110	1	0	0	619.625	2474.47	4	2474.47	0.0014	1	25.86	18	30	0.0083	R	IINEPTAAAIAYGLDKK	G					File4253 Spectrum245292 scans: 35441	126/130C	---	127c/130C	---	128c/130C	---	129c/130C	---	131/130C	---	127n/130C	---	128n/130C	---	129n/130C	---
1	6	Pavir.J03393.1.p|PACid:30196500	Pavir.J03393.1.p|PACid:30196500	1731	87951	98	98	22	22	30.4	5.08	534117	1	0	0	619.626	2474.47	4	2474.47	0.0017	1	26.76	17	30	0.0054	R	IINEPTAAAIAYGLDKK	G					File4255 Spectrum329280 scans: 33112	126/130C	---	127c/130C	---	128c/130C	---	129c/130C	---	131/130C	---	127n/130C	---	128n/130C	---	129n/130C	---
1	6	Pavir.J03393.1.p|PACid:30196500	Pavir.J03393.1.p|PACid:30196500	1731	87951	98	98	22	22	30.4	5.08	534125	1	0	0	825.832	2474.47	3	2474.47	0.0021	1	38.2	30	30	0.0085	R	IINEPTAAAIAYGLDKK	G					File4253 Spectrum245541 scans: 35729	126/130C	---	127c/130C	---	128c/130C	---	129c/130C	---	131/130C	---	127n/130C	---	128n/130C	---	129n/130C	---
1	6	Pavir.J03393.1.p|PACid:30196500	Pavir.J03393.1.p|PACid:30196500	1731	87951	98	98	22	22	30.4	5.08	534129	1	0	0	619.626	2474.47	4	2474.47	0.0022	1	27.8	14	30	0.0025	R	IINEPTAAAIAYGLDKK	G					File4254 Spectrum288468 scans: 35663	126/130C	---	127c/130C	---	128c/130C	---	129c/130C	---	131/130C	---	127n/130C	---	128n/130C	---	129n/130C	---
1	6	Pavir.J03393.1.p|PACid:30196500	Pavir.J03393.1.p|PACid:30196500	1731	87951	98	98	22	22	30.4	5.08	534134	1	0	0	825.832	2474.47	3	2474.47	0.0023	1	55.72		30	0.00015	R	IINEPTAAAIAYGLDKK	G					File4253 Spectrum245319 scans: 35473	126/130C	---	127c/130C	---	128c/130C	---	129c/130C	---	131/130C	---	127n/130C	---	128n/130C	---	129n/130C	---
1	6	Pavir.J03393.1.p|PACid:30196500	Pavir.J03393.1.p|PACid:30196500	1731	87951	98	98	22	22	30.4	5.08	534135	1	0	0	825.832	2474.47	3	2474.47	0.0023	1	48.75		30	0.00076	R	IINEPTAAAIAYGLDKK	G					File4253 Spectrum244866 scans: 34957	126/130C	---	127c/130C	---	128c/130C	---	129c/130C	---	131/130C	---	127n/130C	---	128n/130C	---	129n/130C	---
1	6	Pavir.J03393.1.p|PACid:30196500	Pavir.J03393.1.p|PACid:30196500	1731	87951	98	98	22	22	30.4	5.08	534136	1	0	0	825.832	2474.47	3	2474.47	0.0023	1	47.69		30	0.00098	R	IINEPTAAAIAYGLDKK	G					File4254 Spectrum288171 scans: 35326	126/130C	---	127c/130C	---	128c/130C	---	129c/130C	---	131/130C	---	127n/130C	---	128n/130C	---	129n/130C	---
1	6	Pavir.J03393.1.p|PACid:30196500	Pavir.J03393.1.p|PACid:30196500	1731	87951	98	98	22	22	30.4	5.08	534143	1	0	0	825.832	2474.47	3	2474.47	0.0024	1	39.05	26	30	0.0027	R	IINEPTAAAIAYGLDKK	G					File4253 Spectrum244174 scans: 34172	126/130C	---	127c/130C	---	128c/130C	---	129c/130C	---	131/130C	---	127n/130C	---	128n/130C	---	129n/130C	---
1	6	Pavir.J03393.1.p|PACid:30196500	Pavir.J03393.1.p|PACid:30196500	1731	87951	98	98	22	22	30.4	5.08	534147	1	0	0	825.832	2474.47	3	2474.47	0.0026	1	37.02	23	30	0.0023	R	IINEPTAAAIAYGLDKK	G					File4254 Spectrum288415 scans: 35603	126/130C	---	127c/130C	---	128c/130C	---	129c/130C	---	131/130C	---	127n/130C	---	128n/130C	---	129n/130C	---
1	6	Pavir.J03393.1.p|PACid:30196500	Pavir.J03393.1.p|PACid:30196500	1731	87951	98	98	22	22	30.4	5.08	534148	1	0	0	825.832	2474.47	3	2474.47	0.0026	1	48.89		30	0.00074	R	IINEPTAAAIAYGLDKK	G					File4254 Spectrum287940 scans: 35065	126/130C	---	127c/130C	---	128c/130C	---	129c/130C	---	131/130C	---	127n/130C	---	128n/130C	---	129n/130C	---
1	6	Pavir.J03393.1.p|PACid:30196500	Pavir.J03393.1.p|PACid:30196500	1731	87951	98	98	22	22	30.4	5.08	534149	1	0	0	825.832	2474.47	3	2474.47	0.0026	1	43.76	25	30	0.00074	R	IINEPTAAAIAYGLDKK	G					File4254 Spectrum287241 scans: 34274	126/130C	---	127c/130C	---	128c/130C	---	129c/130C	---	131/130C	---	127n/130C	---	128n/130C	---	129n/130C	---
1	6	Pavir.J03393.1.p|PACid:30196500	Pavir.J03393.1.p|PACid:30196500	1731	87951	98	98	22	22	30.4	5.08	534155	1	0	0	619.626	2474.47	4	2474.47	0.0029	1	29.28	14	30	0.0018	R	IINEPTAAAIAYGLDKK	G					File4253 Spectrum246194 scans: 36483	126/130C	---	127c/130C	---	128c/130C	---	129c/130C	---	131/130C	---	127n/130C	---	128n/130C	---	129n/130C	---
1	6	Pavir.J03393.1.p|PACid:30196500	Pavir.J03393.1.p|PACid:30196500	1731	87951	98	98	22	22	30.4	5.08	534161	1	0	0	825.832	2474.47	3	2474.47	0.003	1	45.42		30	0.0016	R	IINEPTAAAIAYGLDKK	G					File4254 Spectrum288642 scans: 35862	126/130C	---	127c/130C	---	128c/130C	---	129c/130C	---	131/130C	---	127n/130C	---	128n/130C	---	129n/130C	---
1	6	Pavir.J03393.1.p|PACid:30196500	Pavir.J03393.1.p|PACid:30196500	1731	87951	98	98	22	22	30.4	5.08	534162	1	0	0	825.832	2474.47	3	2474.47	0.003	1	50.42	28	30	0.00033	R	IINEPTAAAIAYGLDKK	G					File4253 Spectrum244640 scans: 34701	126/130C	---	127c/130C	---	128c/130C	---	129c/130C	---	131/130C	---	127n/130C	---	128n/130C	---	129n/130C	---
1	6	Pavir.J03393.1.p|PACid:30196500	Pavir.J03393.1.p|PACid:30196500	1731	87951	98	98	22	22	30.4	5.08	534166	1	0	0	619.626	2474.47	4	2474.47	0.0032	1	25.78	14	30	0.0038	R	IINEPTAAAIAYGLDKK	G					File4254 Spectrum288242 scans: 35406	126/130C	---	127c/130C	---	128c/130C	---	129c/130C	---	131/130C	---	127n/130C	---	128n/130C	---	129n/130C	---
1	6	Pavir.J03393.1.p|PACid:30196500	Pavir.J03393.1.p|PACid:30196500	1731	87951	98	98	22	22	30.4	5.08	534167	1	0	0	619.626	2474.47	4	2474.47	0.0032	1	27.05	15	30	0.0032	R	IINEPTAAAIAYGLDKK	G					File4254 Spectrum288011 scans: 35144	126/130C	---	127c/130C	---	128c/130C	---	129c/130C	---	131/130C	---	127n/130C	---	128n/130C	---	129n/130C	---
1	6	Pavir.J03393.1.p|PACid:30196500	Pavir.J03393.1.p|PACid:30196500	1731	87951	98	98	22	22	30.4	5.08	534180	1	0	0	619.626	2474.48	4	2474.47	0.0036	1	24	14	30	0.0056	R	IINEPTAAAIAYGLDKK	G					File4254 Spectrum287304 scans: 34345	126/130C	---	127c/130C	---	128c/130C	---	129c/130C	---	131/130C	---	127n/130C	---	128n/130C	---	129n/130C	---
1	6	Pavir.J03393.1.p|PACid:30196500	Pavir.J03393.1.p|PACid:30196500	1731	87951	98	98	22	22	30.4	5.08	534183	1	0	0	825.832	2474.48	3	2474.47	0.0037	1	40.95	26	30	0.0019	R	IINEPTAAAIAYGLDKK	G					File4253 Spectrum244408 scans: 34438	126/130C	---	127c/130C	---	128c/130C	---	129c/130C	---	131/130C	---	127n/130C	---	128n/130C	---	129n/130C	---
1	6	Pavir.J03393.1.p|PACid:30196500	Pavir.J03393.1.p|PACid:30196500	1731	87951	98	98	22	22	30.4	5.08	534184	1	0	0	825.832	2474.48	3	2474.47	0.0037	1	49.25		30	0.00066	R	IINEPTAAAIAYGLDKK	G					File4254 Spectrum287713 scans: 34808	126/130C	---	127c/130C	---	128c/130C	---	129c/130C	---	131/130C	---	127n/130C	---	128n/130C	---	129n/130C	---
1	6	Pavir.J03393.1.p|PACid:30196500	Pavir.J03393.1.p|PACid:30196500	1731	87951	98	98	22	22	30.4	5.08	534185	1	0	0	825.832	2474.48	3	2474.47	0.0037	1	57.11	28	30	7.7e-05	R	IINEPTAAAIAYGLDKK	G					File4253 Spectrum243944 scans: 33911	126/130C	---	127c/130C	---	128c/130C	---	129c/130C	---	131/130C	---	127n/130C	---	128n/130C	---	129n/130C	---
1	6	Pavir.J03393.1.p|PACid:30196500	Pavir.J03393.1.p|PACid:30196500	1731	87951	98	98	22	22	30.4	5.08	534189	1	0	0	825.832	2474.48	3	2474.47	0.0039	1	48.21	28	30	0.00055	R	IINEPTAAAIAYGLDKK	G					File4254 Spectrum287474 scans: 34538	126/130C	---	127c/130C	---	128c/130C	---	129c/130C	---	131/130C	---	127n/130C	---	128n/130C	---	129n/130C	---
1	6	Pavir.J03393.1.p|PACid:30196500	Pavir.J03393.1.p|PACid:30196500	1731	87951	98	98	22	22	30.4	5.08	534197	1	0	0	825.833	2474.48	3	2474.47	0.0044	1	40.07	22	30	0.00085	R	IINEPTAAAIAYGLDKK	G					File4255 Spectrum329466 scans: 33316	126/130C	---	127c/130C	---	128c/130C	---	129c/130C	---	131/130C	---	127n/130C	---	128n/130C	---	129n/130C	---
1	6	Pavir.J03393.1.p|PACid:30196500	Pavir.J03393.1.p|PACid:30196500	1731	87951	98	98	22	22	30.4	5.08	534214	1	0	0	619.627	2474.48	4	2474.47	0.0056	1	25.51	14	30	0.004	R	IINEPTAAAIAYGLDKK	G					File4254 Spectrum287775 scans: 34878	126/130C	---	127c/130C	---	128c/130C	---	129c/130C	---	131/130C	---	127n/130C	---	128n/130C	---	129n/130C	---
1	6	Pavir.J03393.1.p|PACid:30196500	Pavir.J03393.1.p|PACid:30196500	1731	87951	98	98	22	22	30.4	5.08	534435	1	0	0	826.159	2475.46	3	2475.46	0.0001	1	43.38	28	31	0.0016	R	IINEPTAAAIAYGLDKK	G	Deamidated (NQ)	0.00100000000000000.0			File4250 Spectrum115108 scans: 34357	126/130C	---	127c/130C	---	128c/130C	---	129c/130C	---	131/130C	---	127n/130C	---	128n/130C	---	129n/130C	---
1	6	Pavir.J03393.1.p|PACid:30196500	Pavir.J03393.1.p|PACid:30196500	1731	87951	98	98	22	22	30.4	5.08	534436	1	0	0	619.871	2475.46	4	2475.46	0.0008	1	27.43	14	31	0.0027	R	IINEPTAAAIAYGLDKK	G	Deamidated (NQ)	0.00100000000000000.0			File4249 Spectrum71046 scans: 34495	126/130C	---	127c/130C	---	128c/130C	---	129c/130C	---	131/130C	---	127n/130C	---	128n/130C	---	129n/130C	---
1	6	Pavir.J03393.1.p|PACid:30196500	Pavir.J03393.1.p|PACid:30196500	1731	87951	98	98	22	22	30.4	5.08	534437	1	0	0	826.16	2475.46	3	2475.46	0.0013	1	46.13	30	31	0.0014	R	IINEPTAAAIAYGLDKK	G	Deamidated (NQ)	0.00100000000000000.0			File4250 Spectrum115354 scans: 34627	126/130C	---	127c/130C	---	128c/130C	---	129c/130C	---	131/130C	---	127n/130C	---	128n/130C	---	129n/130C	---
1	6	Pavir.J03393.1.p|PACid:30196500	Pavir.J03393.1.p|PACid:30196500	1731	87951	98	98	22	22	30.4	5.08	534439	1	0	0	826.16	2475.46	3	2475.46	0.0022	1	33.16	21	31	0.0033	R	IINEPTAAAIAYGLDKK	G	Deamidated (NQ)	0.00100000000000000.0			File4250 Spectrum115604 scans: 34903	126/130C	---	127c/130C	---	128c/130C	---	129c/130C	---	131/130C	---	127n/130C	---	128n/130C	---	129n/130C	---
1	6	Pavir.J03393.1.p|PACid:30196500	Pavir.J03393.1.p|PACid:30196500	1731	87951	98	98	22	22	30.4	5.08	534443	1	0	0	826.161	2475.46	3	2475.46	0.0044	1	38.23	16	31	0.0003	R	IINEPTAAAIAYGLDKK	G	Deamidated (NQ)	0.00100000000000000.0			File4249 Spectrum71133 scans: 34589	126/130C	---	127c/130C	---	128c/130C	---	129c/130C	---	131/130C	---	127n/130C	---	128n/130C	---	129n/130C	---
1	6	Pavir.J03393.1.p|PACid:30196500	Pavir.J03393.1.p|PACid:30196500	1731	87951	98	98	22	22	30.4	5.08	534981	1	0	0	827.13	2478.37	3	2478.36	0.0031	1	35.89	24	34	0.0037	K	KINDAVVTVPAYFNDAQR	Q					File4250 Spectrum109075 scans: 27763	126/130C	---	127c/130C	---	128c/130C	---	129c/130C	---	131/130C	---	127n/130C	---	128n/130C	---	129n/130C	---
1	6	Pavir.J03393.1.p|PACid:30196500	Pavir.J03393.1.p|PACid:30196500	1731	87951	98	98	22	22	30.4	5.08	534983	1	0	0	827.13	2478.37	3	2478.36	0.0033	1	38.77	21	34	0.00099	K	KINDAVVTVPAYFNDAQR	Q					File4249 Spectrum64578 scans: 27438	126/130C	---	127c/130C	---	128c/130C	---	129c/130C	---	131/130C	---	127n/130C	---	128n/130C	---	129n/130C	---
1	6	Pavir.J03393.1.p|PACid:30196500	Pavir.J03393.1.p|PACid:30196500	1731	87951	98	98	22	22	30.4	5.08	534984	1	0	0	827.13	2478.37	3	2478.36	0.0033	1	42.21	23	34	0.00066	K	KINDAVVTVPAYFNDAQR	Q					File4249 Spectrum64843 scans: 27725	126/130C	---	127c/130C	---	128c/130C	---	129c/130C	---	131/130C	---	127n/130C	---	128n/130C	---	129n/130C	---
1	6	Pavir.J03393.1.p|PACid:30196500	Pavir.J03393.1.p|PACid:30196500	1731	87951	98	98	22	22	30.4	5.08	534989	1	0	0	827.13	2478.37	3	2478.36	0.0047	1	28.04	20	34	0.0084	K	KINDAVVTVPAYFNDAQR	Q					File4250 Spectrum108808 scans: 27469	126/130C	---	127c/130C	---	128c/130C	---	129c/130C	---	131/130C	---	127n/130C	---	128n/130C	---	129n/130C	---
1	7	Pavir.Ab00168.1.p|PACid:30235837	Pavir.Ab00168.1.p|PACid:30235837	1718	88026	97	97	20	20	28.1	5.11	67704	1	0	0	609.831	1217.65	2	1217.65	0.0013	0	56.97		31	0.00015	R	LSQEEIDR	M					File4254 Spectrum265912 scans: 10849	126/130C	---	127c/130C	---	128c/130C	---	129c/130C	---	131/130C	---	127n/130C	---	128n/130C	---	129n/130C	---
1	7	Pavir.Ab00168.1.p|PACid:30235837	Pavir.Ab00168.1.p|PACid:30235837	1718	88026	97	97	20	20	28.1	5.11	87615	1	0	0	638.898	1275.78	2	1275.78	0.0013	0	34.02	25	32	0.0071	K	ITITNEK	G					File4263 Spectrum637978 scans: 15340	126/130C	---	127c/130C	---	128c/130C	---	129c/130C	---	131/130C	---	127n/130C	---	128n/130C	---	129n/130C	---
1	7	Pavir.Ab00168.1.p|PACid:30235837	Pavir.Ab00168.1.p|PACid:30235837	1718	88026	97	97	20	20	28.1	5.11	89944	1	0	0	428.241	1281.7	3	1281.7	0.0009	0	33.28	22	31	0.0044	R	ALSNQHQVR	V	Deamidated (NQ)	0.000100000.0			File4258 Spectrum409024 scans: 4781	126/130C	---	127c/130C	---	128c/130C	---	129c/130C	---	131/130C	---	127n/130C	---	128n/130C	---	129n/130C	---
1	7	Pavir.Ab00168.1.p|PACid:30235837	Pavir.Ab00168.1.p|PACid:30235837	1718	88026	97	97	20	20	28.1	5.11	132761	1	0	1	467.607	1399.8	3	1399.8	0.0008	0	40.48	29	31	0.0044	K	DAGVISGLNVAR	I					File4254 Spectrum274269 scans: 20002	126/130C	-4313.25	127c/130C	385.213	128c/130C	218.005	129c/130C	-29.582	131/130C	-0.056	127n/130C	-3320.99	128n/130C	257.286	129n/130C	-22.026
1	7	Pavir.Ab00168.1.p|PACid:30235837	Pavir.Ab00168.1.p|PACid:30235837	1718	88026	97	97	20	20	28.1	5.11	132762	1	0	1	700.907	1399.8	2	1399.8	0.0009	0	73.5		31	3.5e-06	K	DAGVISGLNVAR	I					File4253 Spectrum231106 scans: 19751	126/130C	0.979	127c/130C	1.572	128c/130C	0.59	129c/130C	3.156	131/130C	1.251	127n/130C	1.453	128n/130C	0.445	129n/130C	0.807
1	7	Pavir.Ab00168.1.p|PACid:30235837	Pavir.Ab00168.1.p|PACid:30235837	1718	88026	97	97	20	20	28.1	5.11	132767	1	0	1	467.607	1399.8	3	1399.8	0.0015	0	41.16	31	32	0.0058	K	DAGVISGLNVAR	I					File4253 Spectrum231120 scans: 19766	126/130C	0.931	127c/130C	1.308	128c/130C	0.635	129c/130C	2.512	131/130C	1.332	127n/130C	1.256	128n/130C	0.916	129n/130C	1.098
1	7	Pavir.Ab00168.1.p|PACid:30235837	Pavir.Ab00168.1.p|PACid:30235837	1718	88026	97	97	20	20	28.1	5.11	132768	1	0	1	700.907	1399.8	2	1399.8	0.0017	0	73.96		32	3.2e-06	K	DAGVISGLNVAR	I					File4254 Spectrum274235 scans: 19965	126/130C	0.792	127c/130C	1.487	128c/130C	0.513	129c/130C	3.709	131/130C	1.731	127n/130C	1.61	128n/130C	0.271	129n/130C	0.844
1	7	Pavir.Ab00168.1.p|PACid:30235837	Pavir.Ab00168.1.p|PACid:30235837	1718	88026	97	97	20	20	28.1	5.11	132769	1	0	1	467.607	1399.8	3	1399.8	0.0017	0	38.04	27	32	0.0047	K	DAGVISGLNVAR	I					File4253 Spectrum231367 scans: 20033	126/130C	0.723	127c/130C	1.07	128c/130C	0.747	129c/130C	1.567	131/130C	1.262	127n/130C	0.94	128n/130C	0.729	129n/130C	0.737
1	7	Pavir.Ab00168.1.p|PACid:30235837	Pavir.Ab00168.1.p|PACid:30235837	1718	88026	97	97	20	20	28.1	5.11	132771	1	0	1	700.908	1399.8	2	1399.8	0.0023	0	59.71	31	32	8.4e-05	K	DAGVISGLNVAR	I					File4253 Spectrum231355 scans: 20020	126/130C	0.659	127c/130C	1.462	128c/130C	0.413	129c/130C	3.454	131/130C	1.622	127n/130C	1.379	128n/130C	0.255	129n/130C	0.869
1	7	Pavir.Ab00168.1.p|PACid:30235837	Pavir.Ab00168.1.p|PACid:30235837	1718	88026	97	97	20	20	28.1	5.11	132773	1	0	1	700.908	1399.8	2	1399.8	0.0025	0	58.67	26	32	3e-05	K	DAGVISGLNVAR	I					File4254 Spectrum274480 scans: 20231	126/130C	0.787	127c/130C	1.329	128c/130C	0.419	129c/130C	2.792	131/130C	1.571	127n/130C	1.588	128n/130C	0.489	129n/130C	0.886
1	7	Pavir.Ab00168.1.p|PACid:30235837	Pavir.Ab00168.1.p|PACid:30235837	1718	88026	97	97	20	20	28.1	5.11	142621	1	0	0	711.39	1420.76	2	1420.76	0.0011	0	52.19		32	0.00053	K	AMEDAGLEK	S					File4261 Spectrum551094 scans: 17174	126/130C	---	127c/130C	---	128c/130C	---	129c/130C	---	131/130C	---	127n/130C	---	128n/130C	---	129n/130C	---
1	7	Pavir.Ab00168.1.p|PACid:30235837	Pavir.Ab00168.1.p|PACid:30235837	1718	88026	97	97	20	20	28.1	5.11	142622	1	0	0	711.39	1420.77	2	1420.76	0.0013	0	44.31	28	32	0.0015	K	AMEDAGLEK	S					File4262 Spectrum594969 scans: 16473	126/130C	---	127c/130C	---	128c/130C	---	129c/130C	---	131/130C	---	127n/130C	---	128n/130C	---	129n/130C	---
1	7	Pavir.Ab00168.1.p|PACid:30235837	Pavir.Ab00168.1.p|PACid:30235837	1718	88026	97	97	20	20	28.1	5.11	146555	1	0	0	716.392	1430.77	2	1430.77	0.001	1	40.6		31	0.0067	K	GRLSQEEIDR	M					File4253 Spectrum218966 scans: 6269	126/130C	---	127c/130C	---	128c/130C	---	129c/130C	---	131/130C	---	127n/130C	---	128n/130C	---	129n/130C	---
1	7	Pavir.Ab00168.1.p|PACid:30235837	Pavir.Ab00168.1.p|PACid:30235837	1718	88026	97	97	20	20	28.1	5.11	149715	1	0	0	719.387	1436.76	2	1436.76	0.0005	0	28.64	20	31	0.0083	K	AMEDAGLEK	S	Oxidation (M)	0.030000000.0			File4262 Spectrum590643 scans: 11763	126/130C	---	127c/130C	---	128c/130C	---	129c/130C	---	131/130C	---	127n/130C	---	128n/130C	---	129n/130C	---
1	7	Pavir.Ab00168.1.p|PACid:30235837	Pavir.Ab00168.1.p|PACid:30235837	1718	88026	97	97	20	20	28.1	5.11	187968	1	0	0	763.397	1524.78	2	1524.78	0.0014	0	38.96	24	31	0.0019	R	FEELNNDLFR	K					File4253 Spectrum241431 scans: 31109	126/130C	---	127c/130C	---	128c/130C	---	129c/130C	---	131/130C	---	127n/130C	---	128n/130C	---	129n/130C	---
1	7	Pavir.Ab00168.1.p|PACid:30235837	Pavir.Ab00168.1.p|PACid:30235837	1718	88026	97	97	20	20	28.1	5.11	187971	1	0	0	763.397	1524.78	2	1524.78	0.002	0	35.64	24	31	0.0038	R	FEELNNDLFR	K					File4253 Spectrum241199 scans: 30852	126/130C	---	127c/130C	---	128c/130C	---	129c/130C	---	131/130C	---	127n/130C	---	128n/130C	---	129n/130C	---
1	7	Pavir.Ab00168.1.p|PACid:30235837	Pavir.Ab00168.1.p|PACid:30235837	1718	88026	97	97	20	20	28.1	5.11	244441	1	0	0	827.915	1653.81	2	1653.81	0.001	0	39.77	24	30	0.0013	R	EAEEFAEEDK	K					File4262 Spectrum594843 scans: 16336	126/130C	---	127c/130C	---	128c/130C	---	129c/130C	---	131/130C	---	127n/130C	---	128n/130C	---	129n/130C	---
1	7	Pavir.Ab00168.1.p|PACid:30235837	Pavir.Ab00168.1.p|PACid:30235837	1718	88026	97	97	20	20	28.1	5.11	279577	1	0	0	862.998	1723.98	2	1723.98	0.0026	0	56.76	18	33	7.2e-06	K	SQIHEIVLVGGSTR	I					File4259 Spectrum465246 scans: 18676	126/130C	---	127c/130C	---	128c/130C	---	129c/130C	---	131/130C	---	127n/130C	---	128n/130C	---	129n/130C	---
1	7	Pavir.Ab00168.1.p|PACid:30235837	Pavir.Ab00168.1.p|PACid:30235837	1718	88026	97	97	20	20	28.1	5.11	284939	1	0	0	869.455	1736.9	2	1736.89	0.0017	0	33.97	23	32	0.0043	R	ITPSWVAFTDSER	L					File4263 Spectrum652624 scans: 31386	126/130C	---	127c/130C	---	128c/130C	---	129c/130C	---	131/130C	---	127n/130C	---	128n/130C	---	129n/130C	---
1	7	Pavir.Ab00168.1.p|PACid:30235837	Pavir.Ab00168.1.p|PACid:30235837	1718	88026	97	97	20	20	28.1	5.11	284940	1	0	0	869.455	1736.9	2	1736.89	0.0017	0	63.97	23	32	4.5e-06	R	ITPSWVAFTDSER	L					File4263 Spectrum652390 scans: 31127	126/130C	---	127c/130C	---	128c/130C	---	129c/130C	---	131/130C	---	127n/130C	---	128n/130C	---	129n/130C	---
1	7	Pavir.Ab00168.1.p|PACid:30235837	Pavir.Ab00168.1.p|PACid:30235837	1718	88026	97	97	20	20	28.1	5.11	291872	1	0	0	584.979	1751.92	3	1751.92	-0.0004	1	22.23	14	32	0.0085	R	ARFEELNNDLFR	K					File4253 Spectrum235891 scans: 24990	126/130C	---	127c/130C	---	128c/130C	---	129c/130C	---	131/130C	---	127n/130C	---	128n/130C	---	129n/130C	---
1	7	Pavir.Ab00168.1.p|PACid:30235837	Pavir.Ab00168.1.p|PACid:30235837	1718	88026	97	97	20	20	28.1	5.11	291884	1	0	0	584.98	1751.92	3	1751.92	0.002	1	39.84	21	32	0.00078	R	ARFEELNNDLFR	K					File4253 Spectrum236130 scans: 25256	126/130C	---	127c/130C	---	128c/130C	---	129c/130C	---	131/130C	---	127n/130C	---	128n/130C	---	129n/130C	---
1	7	Pavir.Ab00168.1.p|PACid:30235837	Pavir.Ab00168.1.p|PACid:30235837	1718	88026	97	97	20	20	28.1	5.11	292593	1	0	0	585.308	1752.9	3	1752.9	0.0009	1	34.78	22	32	0.0029	R	ARFEELNNDLFR	K	Deamidated (NQ)	0.000000100000.0			File4264 Spectrum690574 scans: 25188	126/130C	---	127c/130C	---	128c/130C	---	129c/130C	---	131/130C	---	127n/130C	---	128n/130C	---	129n/130C	---
1	7	Pavir.Ab00168.1.p|PACid:30235837	Pavir.Ab00168.1.p|PACid:30235837	1718	88026	97	97	20	20	28.1	5.11	292600	1	0	0	585.308	1752.9	3	1752.9	0.002	1	32.12	21	32	0.0047	R	ARFEELNNDLFR	K	Deamidated (NQ)	0.000000010000.0			File4263 Spectrum646678 scans: 24842	126/130C	---	127c/130C	---	128c/130C	---	129c/130C	---	131/130C	---	127n/130C	---	128n/130C	---	129n/130C	---
1	7	Pavir.Ab00168.1.p|PACid:30235837	Pavir.Ab00168.1.p|PACid:30235837	1718	88026	97	97	20	20	28.1	5.11	297728	1	0	0	883.461	1764.91	2	1764.91	0.0011	0	43.49	17	32	0.00012	K	NGHVEIIANDQGNR	I					File4248 Spectrum6274 scans: 8742	126/130C	---	127c/130C	---	128c/130C	---	129c/130C	---	131/130C	---	127n/130C	---	128n/130C	---	129n/130C	---
1	7	Pavir.Ab00168.1.p|PACid:30235837	Pavir.Ab00168.1.p|PACid:30235837	1718	88026	97	97	20	20	28.1	5.11	297731	1	0	0	589.31	1764.91	3	1764.91	0.0015	0	42.29	18	32	0.0002	K	NGHVEIIANDQGNR	I					File4248 Spectrum6271 scans: 8739	126/130C	---	127c/130C	---	128c/130C	---	129c/130C	---	131/130C	---	127n/130C	---	128n/130C	---	129n/130C	---
1	7	Pavir.Ab00168.1.p|PACid:30235837	Pavir.Ab00168.1.p|PACid:30235837	1718	88026	97	97	20	20	28.1	5.11	297733	1	0	0	589.31	1764.91	3	1764.91	0.0019	0	41.88	17	32	0.0002	K	NGHVEIIANDQGNR	I					File4248 Spectrum6037 scans: 8478	126/130C	---	127c/130C	---	128c/130C	---	129c/130C	---	131/130C	---	127n/130C	---	128n/130C	---	129n/130C	---
1	7	Pavir.Ab00168.1.p|PACid:30235837	Pavir.Ab00168.1.p|PACid:30235837	1718	88026	97	97	20	20	28.1	5.11	297740	1	0	0	883.462	1764.91	2	1764.91	0.0031	0	31.95	16	32	0.0013	K	NGHVEIIANDQGNR	I					File4248 Spectrum6045 scans: 8486	126/130C	---	127c/130C	---	128c/130C	---	129c/130C	---	131/130C	---	127n/130C	---	128n/130C	---	129n/130C	---
1	7	Pavir.Ab00168.1.p|PACid:30235837	Pavir.Ab00168.1.p|PACid:30235837	1718	88026	97	97	20	20	28.1	5.11	298240	1	0	0	589.638	1765.89	3	1765.89	0.0019	0	43.45	22	32	0.00039	K	NGHVEIIANDQGNR	I	Deamidated (NQ)	0.10000000000000.0			File4251 Spectrum136428 scans: 9584	126/130C	---	127c/130C	---	128c/130C	---	129c/130C	---	131/130C	---	127n/130C	---	128n/130C	---	129n/130C	---
1	7	Pavir.Ab00168.1.p|PACid:30235837	Pavir.Ab00168.1.p|PACid:30235837	1718	88026	97	97	20	20	28.1	5.11	298244	1	0	0	589.639	1765.89	3	1765.89	0.0027	0	23.89	15	32	0.0081	K	NGHVEIIANDQGNR	I	Deamidated (NQ)	0.00000000000010.0			File4252 Spectrum178518 scans: 8775	126/130C	---	127c/130C	---	128c/130C	---	129c/130C	---	131/130C	---	127n/130C	---	128n/130C	---	129n/130C	---
1	7	Pavir.Ab00168.1.p|PACid:30235837	Pavir.Ab00168.1.p|PACid:30235837	1718	88026	97	97	20	20	28.1	5.11	298249	1	0	0	589.639	1765.89	3	1765.89	0.0034	0	28.24	19	32	0.0065	K	NGHVEIIANDQGNR	I	Deamidated (NQ)	0.10000000000000.0			File4250 Spectrum93652 scans: 10949	126/130C	---	127c/130C	---	128c/130C	---	129c/130C	---	131/130C	---	127n/130C	---	128n/130C	---	129n/130C	---
1	7	Pavir.Ab00168.1.p|PACid:30235837	Pavir.Ab00168.1.p|PACid:30235837	1718	88026	97	97	20	20	28.1	5.11	298649	1	0	0	589.972	1766.89	3	1766.88	0.0182	0	28.49	17	32	0.0044	K	NGHVEIIANDQGNR	I	2 Deamidated (NQ)	0.10000000100000.0			File4251 Spectrum137600 scans: 10893	126/130C	---	127c/130C	---	128c/130C	---	129c/130C	---	131/130C	---	127n/130C	---	128n/130C	---	129n/130C	---
1	7	Pavir.Ab00168.1.p|PACid:30235837	Pavir.Ab00168.1.p|PACid:30235837	1718	88026	97	97	20	20	28.1	5.11	298660	1	0	0	884.455	1766.9	2	1766.88	0.0213	0	22.93	14	32	0.0071	K	NGHVEIIANDQGNR	I	2 Deamidated (NQ)	0.10000000001000.0			File4251 Spectrum136433 scans: 9590	126/130C	---	127c/130C	---	128c/130C	---	129c/130C	---	131/130C	---	127n/130C	---	128n/130C	---	129n/130C	---
1	7	Pavir.Ab00168.1.p|PACid:30235837	Pavir.Ab00168.1.p|PACid:30235837	1718	88026	97	97	20	20	28.1	5.11	310370	1	0	0	599.013	1794.02	3	1794.02	0.0014	1	33.21	20	33	0.0026	K	KAMEDAGLEK	S	Oxidation (M)	0.0030000000.0			File4248 Spectrum9093 scans: 11895	126/130C	---	127c/130C	---	128c/130C	---	129c/130C	---	131/130C	---	127n/130C	---	128n/130C	---	129n/130C	---
1	7	Pavir.Ab00168.1.p|PACid:30235837	Pavir.Ab00168.1.p|PACid:30235837	1718	88026	97	97	20	20	28.1	5.11	310379	1	0	0	599.014	1794.02	3	1794.02	0.0041	1	22.71	14	33	0.0074	K	KAMEDAGLEK	S	Oxidation (M)	0.0030000000.0			File4255 Spectrum308276 scans: 10148	126/130C	---	127c/130C	---	128c/130C	---	129c/130C	---	131/130C	---	127n/130C	---	128n/130C	---	129n/130C	---
1	7	Pavir.Ab00168.1.p|PACid:30235837	Pavir.Ab00168.1.p|PACid:30235837	1718	88026	97	97	20	20	28.1	5.11	337121	1	0	0	931	1859.99	2	1859.99	0.0005	0	40.21	24	33	0.0015	R	NQLETYVYNMK	N					File4261 Spectrum562893 scans: 30026	126/130C	---	127c/130C	---	128c/130C	---	129c/130C	---	131/130C	---	127n/130C	---	128n/130C	---	129n/130C	---
1	7	Pavir.Ab00168.1.p|PACid:30235837	Pavir.Ab00168.1.p|PACid:30235837	1718	88026	97	97	20	20	28.1	5.11	337126	1	0	0	931.001	1859.99	2	1859.99	0.0013	0	33.27	23	33	0.0052	R	NQLETYVYNMK	N					File4261 Spectrum563139 scans: 30295	126/130C	---	127c/130C	---	128c/130C	---	129c/130C	---	131/130C	---	127n/130C	---	128n/130C	---	129n/130C	---
1	7	Pavir.Ab00168.1.p|PACid:30235837	Pavir.Ab00168.1.p|PACid:30235837	1718	88026	97	97	20	20	28.1	5.11	343754	1	0	0	626.334	1875.98	3	1875.98	-0.0001	0	28.51	18	33	0.0047	R	NQLETYVYNMK	N	Oxidation (M)	0.00000000030.0			File4260 Spectrum512675 scans: 23495	126/130C	---	127c/130C	---	128c/130C	---	129c/130C	---	131/130C	---	127n/130C	---	128n/130C	---	129n/130C	---
1	7	Pavir.Ab00168.1.p|PACid:30235837	Pavir.Ab00168.1.p|PACid:30235837	1718	88026	97	97	20	20	28.1	5.11	343768	1	0	0	938.999	1875.98	2	1875.98	0.0019	0	44.13	20	33	0.00023	R	NQLETYVYNMK	N	Oxidation (M)	0.00000000030.0			File4248 Spectrum19193 scans: 22936	126/130C	---	127c/130C	---	128c/130C	---	129c/130C	---	131/130C	---	127n/130C	---	128n/130C	---	129n/130C	---
1	7	Pavir.Ab00168.1.p|PACid:30235837	Pavir.Ab00168.1.p|PACid:30235837	1718	88026	97	97	20	20	28.1	5.11	343770	1	0	0	938.999	1875.98	2	1875.98	0.002	0	27.22	19	33	0.0088	R	NQLETYVYNMK	N	Oxidation (M)	0.00000000030.0			File4261 Spectrum557473 scans: 24106	126/130C	---	127c/130C	---	128c/130C	---	129c/130C	---	131/130C	---	127n/130C	---	128n/130C	---	129n/130C	---
1	7	Pavir.Ab00168.1.p|PACid:30235837	Pavir.Ab00168.1.p|PACid:30235837	1718	88026	97	97	20	20	28.1	5.11	391797	1	0	0	665.714	1994.12	3	1994.12	0.0032	0	32.92	22	33	0.0048	K	VFSPEEISAMILGK	M	Oxidation (M)	0.00000000030000.0			File4255 Spectrum335785 scans: 40370	126/130C	---	127c/130C	---	128c/130C	---	129c/130C	---	131/130C	---	127n/130C	---	128n/130C	---	129n/130C	---
1	7	Pavir.Ab00168.1.p|PACid:30235837	Pavir.Ab00168.1.p|PACid:30235837	1718	88026	97	97	20	20	28.1	5.11	416918	1	0	0	689.359	2065.06	3	2065.05	0.0015	0	39.08	19	33	0.00057	K	EVEAVCNPIISAVYQR	S	Methylthio (C)	0.0000020000000000.0			File4249 Spectrum75479 scans: 39412	126/130C	---	127c/130C	---	128c/130C	---	129c/130C	---	131/130C	---	127n/130C	---	128n/130C	---	129n/130C	---
1	7	Pavir.Ab00168.1.p|PACid:30235837	Pavir.Ab00168.1.p|PACid:30235837	1718	88026	97	97	20	20	28.1	5.11	416923	1	0	0	1033.54	2065.06	2	2065.05	0.0021	0	62.52	23	33	6.5e-06	K	EVEAVCNPIISAVYQR	S	Methylthio (C)	0.0000020000000000.0			File4249 Spectrum75480 scans: 39413	126/130C	---	127c/130C	---	128c/130C	---	129c/130C	---	131/130C	---	127n/130C	---	128n/130C	---	129n/130C	---
1	7	Pavir.Ab00168.1.p|PACid:30235837	Pavir.Ab00168.1.p|PACid:30235837	1718	88026	97	97	20	20	28.1	5.11	416925	1	0	0	689.36	2065.06	3	2065.05	0.0028	0	23.11	15	33	0.0094	K	EVEAVCNPIISAVYQR	S	Methylthio (C)	0.0000020000000000.0			File4249 Spectrum75234 scans: 39137	126/130C	---	127c/130C	---	128c/130C	---	129c/130C	---	131/130C	---	127n/130C	---	128n/130C	---	129n/130C	---
1	7	Pavir.Ab00168.1.p|PACid:30235837	Pavir.Ab00168.1.p|PACid:30235837	1718	88026	97	97	20	20	28.1	5.11	434546	1	0	0	706.745	2117.21	3	2117.21	0	0	27.74	16	33	0.004	R	IINEPTAAAIAYGLDK	K					File4262 Spectrum613316 scans: 36497	126/130C	---	127c/130C	---	128c/130C	---	129c/130C	---	131/130C	---	127n/130C	---	128n/130C	---	129n/130C	---
1	7	Pavir.Ab00168.1.p|PACid:30235837	Pavir.Ab00168.1.p|PACid:30235837	1718	88026	97	97	20	20	28.1	5.11	434552	1	0	0	706.745	2117.21	3	2117.21	0.0009	0	25.13	14	33	0.0044	R	IINEPTAAAIAYGLDK	K					File4263 Spectrum657457 scans: 36836	126/130C	---	127c/130C	---	128c/130C	---	129c/130C	---	131/130C	---	127n/130C	---	128n/130C	---	129n/130C	---
1	7	Pavir.Ab00168.1.p|PACid:30235837	Pavir.Ab00168.1.p|PACid:30235837	1718	88026	97	97	20	20	28.1	5.11	434557	1	0	0	1059.62	2117.22	2	2117.21	0.0017	0	89.12	26	33	2.9e-08	R	IINEPTAAAIAYGLDK	K					File4263 Spectrum656566 scans: 35811	126/130C	---	127c/130C	---	128c/130C	---	129c/130C	---	131/130C	---	127n/130C	---	128n/130C	---	129n/130C	---
1	7	Pavir.Ab00168.1.p|PACid:30235837	Pavir.Ab00168.1.p|PACid:30235837	1718	88026	97	97	20	20	28.1	5.11	434558	1	0	0	706.746	2117.22	3	2117.21	0.0018	0	28.56	18	33	0.0048	R	IINEPTAAAIAYGLDK	K					File4263 Spectrum657247 scans: 36586	126/130C	---	127c/130C	---	128c/130C	---	129c/130C	---	131/130C	---	127n/130C	---	128n/130C	---	129n/130C	---
1	7	Pavir.Ab00168.1.p|PACid:30235837	Pavir.Ab00168.1.p|PACid:30235837	1718	88026	97	97	20	20	28.1	5.11	434563	1	0	0	706.746	2117.22	3	2117.21	0.0021	0	41.05	23	33	0.00084	R	IINEPTAAAIAYGLDK	K					File4262 Spectrum612447 scans: 35535	126/130C	---	127c/130C	---	128c/130C	---	129c/130C	---	131/130C	---	127n/130C	---	128n/130C	---	129n/130C	---
1	7	Pavir.Ab00168.1.p|PACid:30235837	Pavir.Ab00168.1.p|PACid:30235837	1718	88026	97	97	20	20	28.1	5.11	434564	1	0	0	706.746	2117.22	3	2117.21	0.0021	0	27.8	17	33	0.005	R	IINEPTAAAIAYGLDK	K					File4264 Spectrum699868 scans: 35324	126/130C	---	127c/130C	---	128c/130C	---	129c/130C	---	131/130C	---	127n/130C	---	128n/130C	---	129n/130C	---
1	7	Pavir.Ab00168.1.p|PACid:30235837	Pavir.Ab00168.1.p|PACid:30235837	1718	88026	97	97	20	20	28.1	5.11	434568	1	0	0	706.746	2117.22	3	2117.21	0.0023	0	30.93	22	33	0.007	R	IINEPTAAAIAYGLDK	K					File4263 Spectrum657027 scans: 36335	126/130C	---	127c/130C	---	128c/130C	---	129c/130C	---	131/130C	---	127n/130C	---	128n/130C	---	129n/130C	---
1	7	Pavir.Ab00168.1.p|PACid:30235837	Pavir.Ab00168.1.p|PACid:30235837	1718	88026	97	97	20	20	28.1	5.11	434569	1	0	0	706.746	2117.22	3	2117.21	0.0023	0	37.09	21	33	0.0013	R	IINEPTAAAIAYGLDK	K					File4263 Spectrum656808 scans: 36086	126/130C	---	127c/130C	---	128c/130C	---	129c/130C	---	131/130C	---	127n/130C	---	128n/130C	---	129n/130C	---
1	7	Pavir.Ab00168.1.p|PACid:30235837	Pavir.Ab00168.1.p|PACid:30235837	1718	88026	97	97	20	20	28.1	5.11	434571	1	0	0	706.746	2117.22	3	2117.21	0.0025	0	36.61	17	33	0.00056	R	IINEPTAAAIAYGLDK	K					File4263 Spectrum656356 scans: 35571	126/130C	---	127c/130C	---	128c/130C	---	129c/130C	---	131/130C	---	127n/130C	---	128n/130C	---	129n/130C	---
1	7	Pavir.Ab00168.1.p|PACid:30235837	Pavir.Ab00168.1.p|PACid:30235837	1718	88026	97	97	20	20	28.1	5.11	434580	1	0	0	1059.62	2117.22	2	2117.21	0.0039	0	55.29	27	33	7.5e-05	R	IINEPTAAAIAYGLDK	K					File4262 Spectrum612488 scans: 35580	126/130C	---	127c/130C	---	128c/130C	---	129c/130C	---	131/130C	---	127n/130C	---	128n/130C	---	129n/130C	---
1	7	Pavir.Ab00168.1.p|PACid:30235837	Pavir.Ab00168.1.p|PACid:30235837	1718	88026	97	97	20	20	28.1	5.11	434581	1	0	0	706.746	2117.22	3	2117.21	0.004	0	36.39	18	33	0.00079	R	IINEPTAAAIAYGLDK	K					File4263 Spectrum656581 scans: 35828	126/130C	---	127c/130C	---	128c/130C	---	129c/130C	---	131/130C	---	127n/130C	---	128n/130C	---	129n/130C	---
1	7	Pavir.Ab00168.1.p|PACid:30235837	Pavir.Ab00168.1.p|PACid:30235837	1718	88026	97	97	20	20	28.1	5.11	434582	1	0	0	706.746	2117.22	3	2117.21	0.004	0	35.95	16	33	0.00054	R	IINEPTAAAIAYGLDK	K					File4249 Spectrum71622 scans: 35126	126/130C	---	127c/130C	---	128c/130C	---	129c/130C	---	131/130C	---	127n/130C	---	128n/130C	---	129n/130C	---
1	7	Pavir.Ab00168.1.p|PACid:30235837	Pavir.Ab00168.1.p|PACid:30235837	1718	88026	97	97	20	20	28.1	5.11	434587	1	0	0	1059.62	2117.22	2	2117.21	0.0061	0	42.64	26	33	0.0011	R	IINEPTAAAIAYGLDK	K					File4262 Spectrum612243 scans: 35310	126/130C	---	127c/130C	---	128c/130C	---	129c/130C	---	131/130C	---	127n/130C	---	128n/130C	---	129n/130C	---
1	7	Pavir.Ab00168.1.p|PACid:30235837	Pavir.Ab00168.1.p|PACid:30235837	1718	88026	97	97	20	20	28.1	5.11	435740	1	0	0	1061.56	2121.11	2	2121.11	-0.0004	0	38.1	24	33	0.002	K	INDAVVTVPAYFNDAQR	Q					File4248 Spectrum25562 scans: 29916	126/130C	---	127c/130C	---	128c/130C	---	129c/130C	---	131/130C	---	127n/130C	---	128n/130C	---	129n/130C	---
1	7	Pavir.Ab00168.1.p|PACid:30235837	Pavir.Ab00168.1.p|PACid:30235837	1718	88026	97	97	20	20	28.1	5.11	435746	1	0	0	708.043	2121.11	3	2121.11	0.0017	0	28.33	21	33	0.0093	K	INDAVVTVPAYFNDAQR	Q					File4248 Spectrum25268 scans: 29590	126/130C	---	127c/130C	---	128c/130C	---	129c/130C	---	131/130C	---	127n/130C	---	128n/130C	---	129n/130C	---
1	7	Pavir.Ab00168.1.p|PACid:30235837	Pavir.Ab00168.1.p|PACid:30235837	1718	88026	97	97	20	20	28.1	5.11	435747	1	0	0	1061.56	2121.11	2	2121.11	0.0018	0	70.92	26	33	1.8e-06	K	INDAVVTVPAYFNDAQR	Q					File4248 Spectrum25325 scans: 29654	126/130C	---	127c/130C	---	128c/130C	---	129c/130C	---	131/130C	---	127n/130C	---	128n/130C	---	129n/130C	---
1	7	Pavir.Ab00168.1.p|PACid:30235837	Pavir.Ab00168.1.p|PACid:30235837	1718	88026	97	97	20	20	28.1	5.11	435749	1	0	0	708.043	2121.11	3	2121.11	0.002	0	31.76	16	33	0.0014	K	INDAVVTVPAYFNDAQR	Q					File4257 Spectrum389217 scans: 30791	126/130C	---	127c/130C	---	128c/130C	---	129c/130C	---	131/130C	---	127n/130C	---	128n/130C	---	129n/130C	---
1	7	Pavir.Ab00168.1.p|PACid:30235837	Pavir.Ab00168.1.p|PACid:30235837	1718	88026	97	97	20	20	28.1	5.11	435750	1	0	0	708.043	2121.11	3	2121.11	0.002	0	36.89	22	33	0.0017	K	INDAVVTVPAYFNDAQR	Q					File4248 Spectrum25502 scans: 29850	126/130C	---	127c/130C	---	128c/130C	---	129c/130C	---	131/130C	---	127n/130C	---	128n/130C	---	129n/130C	---
1	7	Pavir.Ab00168.1.p|PACid:30235837	Pavir.Ab00168.1.p|PACid:30235837	1718	88026	97	97	20	20	28.1	5.11	435751	1	0	0	1061.56	2121.11	2	2121.11	0.0025	0	54.11	25	33	6.4e-05	K	INDAVVTVPAYFNDAQR	Q					File4257 Spectrum389228 scans: 30803	126/130C	---	127c/130C	---	128c/130C	---	129c/130C	---	131/130C	---	127n/130C	---	128n/130C	---	129n/130C	---
1	7	Pavir.Ab00168.1.p|PACid:30235837	Pavir.Ab00168.1.p|PACid:30235837	1718	88026	97	97	20	20	28.1	5.11	436083	1	0	0	708.371	2122.09	3	2122.09	0.0017	0	33.04	19	33	0.0024	K	INDAVVTVPAYFNDAQR	Q	Deamidated (NQ)	0.00000000000010000.0			File4253 Spectrum241165 scans: 30814	126/130C	---	127c/130C	---	128c/130C	---	129c/130C	---	131/130C	---	127n/130C	---	128n/130C	---	129n/130C	---
1	7	Pavir.Ab00168.1.p|PACid:30235837	Pavir.Ab00168.1.p|PACid:30235837	1718	88026	97	97	20	20	28.1	5.11	534108	1	0	0	825.832	2474.47	3	2474.47	0.0013	1	43.98		30	0.0023	R	IINEPTAAAIAYGLDKK	G					File4253 Spectrum245096 scans: 35218	126/130C	---	127c/130C	---	128c/130C	---	129c/130C	---	131/130C	---	127n/130C	---	128n/130C	---	129n/130C	---
1	7	Pavir.Ab00168.1.p|PACid:30235837	Pavir.Ab00168.1.p|PACid:30235837	1718	88026	97	97	20	20	28.1	5.11	534110	1	0	0	619.625	2474.47	4	2474.47	0.0014	1	25.86	18	30	0.0083	R	IINEPTAAAIAYGLDKK	G					File4253 Spectrum245292 scans: 35441	126/130C	---	127c/130C	---	128c/130C	---	129c/130C	---	131/130C	---	127n/130C	---	128n/130C	---	129n/130C	---
1	7	Pavir.Ab00168.1.p|PACid:30235837	Pavir.Ab00168.1.p|PACid:30235837	1718	88026	97	97	20	20	28.1	5.11	534117	1	0	0	619.626	2474.47	4	2474.47	0.0017	1	26.76	17	30	0.0054	R	IINEPTAAAIAYGLDKK	G					File4255 Spectrum329280 scans: 33112	126/130C	---	127c/130C	---	128c/130C	---	129c/130C	---	131/130C	---	127n/130C	---	128n/130C	---	129n/130C	---
1	7	Pavir.Ab00168.1.p|PACid:30235837	Pavir.Ab00168.1.p|PACid:30235837	1718	88026	97	97	20	20	28.1	5.11	534125	1	0	0	825.832	2474.47	3	2474.47	0.0021	1	38.2	30	30	0.0085	R	IINEPTAAAIAYGLDKK	G					File4253 Spectrum245541 scans: 35729	126/130C	---	127c/130C	---	128c/130C	---	129c/130C	---	131/130C	---	127n/130C	---	128n/130C	---	129n/130C	---
1	7	Pavir.Ab00168.1.p|PACid:30235837	Pavir.Ab00168.1.p|PACid:30235837	1718	88026	97	97	20	20	28.1	5.11	534129	1	0	0	619.626	2474.47	4	2474.47	0.0022	1	27.8	14	30	0.0025	R	IINEPTAAAIAYGLDKK	G					File4254 Spectrum288468 scans: 35663	126/130C	---	127c/130C	---	128c/130C	---	129c/130C	---	131/130C	---	127n/130C	---	128n/130C	---	129n/130C	---
1	7	Pavir.Ab00168.1.p|PACid:30235837	Pavir.Ab00168.1.p|PACid:30235837	1718	88026	97	97	20	20	28.1	5.11	534134	1	0	0	825.832	2474.47	3	2474.47	0.0023	1	55.72		30	0.00015	R	IINEPTAAAIAYGLDKK	G					File4253 Spectrum245319 scans: 35473	126/130C	---	127c/130C	---	128c/130C	---	129c/130C	---	131/130C	---	127n/130C	---	128n/130C	---	129n/130C	---
1	7	Pavir.Ab00168.1.p|PACid:30235837	Pavir.Ab00168.1.p|PACid:30235837	1718	88026	97	97	20	20	28.1	5.11	534135	1	0	0	825.832	2474.47	3	2474.47	0.0023	1	48.75		30	0.00076	R	IINEPTAAAIAYGLDKK	G					File4253 Spectrum244866 scans: 34957	126/130C	---	127c/130C	---	128c/130C	---	129c/130C	---	131/130C	---	127n/130C	---	128n/130C	---	129n/130C	---
1	7	Pavir.Ab00168.1.p|PACid:30235837	Pavir.Ab00168.1.p|PACid:30235837	1718	88026	97	97	20	20	28.1	5.11	534136	1	0	0	825.832	2474.47	3	2474.47	0.0023	1	47.69		30	0.00098	R	IINEPTAAAIAYGLDKK	G					File4254 Spectrum288171 scans: 35326	126/130C	---	127c/130C	---	128c/130C	---	129c/130C	---	131/130C	---	127n/130C	---	128n/130C	---	129n/130C	---
1	7	Pavir.Ab00168.1.p|PACid:30235837	Pavir.Ab00168.1.p|PACid:30235837	1718	88026	97	97	20	20	28.1	5.11	534143	1	0	0	825.832	2474.47	3	2474.47	0.0024	1	39.05	26	30	0.0027	R	IINEPTAAAIAYGLDKK	G					File4253 Spectrum244174 scans: 34172	126/130C	---	127c/130C	---	128c/130C	---	129c/130C	---	131/130C	---	127n/130C	---	128n/130C	---	129n/130C	---
1	7	Pavir.Ab00168.1.p|PACid:30235837	Pavir.Ab00168.1.p|PACid:30235837	1718	88026	97	97	20	20	28.1	5.11	534147	1	0	0	825.832	2474.47	3	2474.47	0.0026	1	37.02	23	30	0.0023	R	IINEPTAAAIAYGLDKK	G					File4254 Spectrum288415 scans: 35603	126/130C	---	127c/130C	---	128c/130C	---	129c/130C	---	131/130C	---	127n/130C	---	128n/130C	---	129n/130C	---
1	7	Pavir.Ab00168.1.p|PACid:30235837	Pavir.Ab00168.1.p|PACid:30235837	1718	88026	97	97	20	20	28.1	5.11	534148	1	0	0	825.832	2474.47	3	2474.47	0.0026	1	48.89		30	0.00074	R	IINEPTAAAIAYGLDKK	G					File4254 Spectrum287940 scans: 35065	126/130C	---	127c/130C	---	128c/130C	---	129c/130C	---	131/130C	---	127n/130C	---	128n/130C	---	129n/130C	---
1	7	Pavir.Ab00168.1.p|PACid:30235837	Pavir.Ab00168.1.p|PACid:30235837	1718	88026	97	97	20	20	28.1	5.11	534149	1	0	0	825.832	2474.47	3	2474.47	0.0026	1	43.76	25	30	0.00074	R	IINEPTAAAIAYGLDKK	G					File4254 Spectrum287241 scans: 34274	126/130C	---	127c/130C	---	128c/130C	---	129c/130C	---	131/130C	---	127n/130C	---	128n/130C	---	129n/130C	---
1	7	Pavir.Ab00168.1.p|PACid:30235837	Pavir.Ab00168.1.p|PACid:30235837	1718	88026	97	97	20	20	28.1	5.11	534155	1	0	0	619.626	2474.47	4	2474.47	0.0029	1	29.28	14	30	0.0018	R	IINEPTAAAIAYGLDKK	G					File4253 Spectrum246194 scans: 36483	126/130C	---	127c/130C	---	128c/130C	---	129c/130C	---	131/130C	---	127n/130C	---	128n/130C	---	129n/130C	---
1	7	Pavir.Ab00168.1.p|PACid:30235837	Pavir.Ab00168.1.p|PACid:30235837	1718	88026	97	97	20	20	28.1	5.11	534161	1	0	0	825.832	2474.47	3	2474.47	0.003	1	45.42		30	0.0016	R	IINEPTAAAIAYGLDKK	G					File4254 Spectrum288642 scans: 35862	126/130C	---	127c/130C	---	128c/130C	---	129c/130C	---	131/130C	---	127n/130C	---	128n/130C	---	129n/130C	---
1	7	Pavir.Ab00168.1.p|PACid:30235837	Pavir.Ab00168.1.p|PACid:30235837	1718	88026	97	97	20	20	28.1	5.11	534162	1	0	0	825.832	2474.47	3	2474.47	0.003	1	50.42	28	30	0.00033	R	IINEPTAAAIAYGLDKK	G					File4253 Spectrum244640 scans: 34701	126/130C	---	127c/130C	---	128c/130C	---	129c/130C	---	131/130C	---	127n/130C	---	128n/130C	---	129n/130C	---
1	7	Pavir.Ab00168.1.p|PACid:30235837	Pavir.Ab00168.1.p|PACid:30235837	1718	88026	97	97	20	20	28.1	5.11	534166	1	0	0	619.626	2474.47	4	2474.47	0.0032	1	25.78	14	30	0.0038	R	IINEPTAAAIAYGLDKK	G					File4254 Spectrum288242 scans: 35406	126/130C	---	127c/130C	---	128c/130C	---	129c/130C	---	131/130C	---	127n/130C	---	128n/130C	---	129n/130C	---
1	7	Pavir.Ab00168.1.p|PACid:30235837	Pavir.Ab00168.1.p|PACid:30235837	1718	88026	97	97	20	20	28.1	5.11	534167	1	0	0	619.626	2474.47	4	2474.47	0.0032	1	27.05	15	30	0.0032	R	IINEPTAAAIAYGLDKK	G					File4254 Spectrum288011 scans: 35144	126/130C	---	127c/130C	---	128c/130C	---	129c/130C	---	131/130C	---	127n/130C	---	128n/130C	---	129n/130C	---
1	7	Pavir.Ab00168.1.p|PACid:30235837	Pavir.Ab00168.1.p|PACid:30235837	1718	88026	97	97	20	20	28.1	5.11	534180	1	0	0	619.626	2474.48	4	2474.47	0.0036	1	24	14	30	0.0056	R	IINEPTAAAIAYGLDKK	G					File4254 Spectrum287304 scans: 34345	126/130C	---	127c/130C	---	128c/130C	---	129c/130C	---	131/130C	---	127n/130C	---	128n/130C	---	129n/130C	---
1	7	Pavir.Ab00168.1.p|PACid:30235837	Pavir.Ab00168.1.p|PACid:30235837	1718	88026	97	97	20	20	28.1	5.11	534183	1	0	0	825.832	2474.48	3	2474.47	0.0037	1	40.95	26	30	0.0019	R	IINEPTAAAIAYGLDKK	G					File4253 Spectrum244408 scans: 34438	126/130C	---	127c/130C	---	128c/130C	---	129c/130C	---	131/130C	---	127n/130C	---	128n/130C	---	129n/130C	---
1	7	Pavir.Ab00168.1.p|PACid:30235837	Pavir.Ab00168.1.p|PACid:30235837	1718	88026	97	97	20	20	28.1	5.11	534184	1	0	0	825.832	2474.48	3	2474.47	0.0037	1	49.25		30	0.00066	R	IINEPTAAAIAYGLDKK	G					File4254 Spectrum287713 scans: 34808	126/130C	---	127c/130C	---	128c/130C	---	129c/130C	---	131/130C	---	127n/130C	---	128n/130C	---	129n/130C	---
1	7	Pavir.Ab00168.1.p|PACid:30235837	Pavir.Ab00168.1.p|PACid:30235837	1718	88026	97	97	20	20	28.1	5.11	534185	1	0	0	825.832	2474.48	3	2474.47	0.0037	1	57.11	28	30	7.7e-05	R	IINEPTAAAIAYGLDKK	G					File4253 Spectrum243944 scans: 33911	126/130C	---	127c/130C	---	128c/130C	---	129c/130C	---	131/130C	---	127n/130C	---	128n/130C	---	129n/130C	---
1	7	Pavir.Ab00168.1.p|PACid:30235837	Pavir.Ab00168.1.p|PACid:30235837	1718	88026	97	97	20	20	28.1	5.11	534189	1	0	0	825.832	2474.48	3	2474.47	0.0039	1	48.21	28	30	0.00055	R	IINEPTAAAIAYGLDKK	G					File4254 Spectrum287474 scans: 34538	126/130C	---	127c/130C	---	128c/130C	---	129c/130C	---	131/130C	---	127n/130C	---	128n/130C	---	129n/130C	---
1	7	Pavir.Ab00168.1.p|PACid:30235837	Pavir.Ab00168.1.p|PACid:30235837	1718	88026	97	97	20	20	28.1	5.11	534197	1	0	0	825.833	2474.48	3	2474.47	0.0044	1	40.07	22	30	0.00085	R	IINEPTAAAIAYGLDKK	G					File4255 Spectrum329466 scans: 33316	126/130C	---	127c/130C	---	128c/130C	---	129c/130C	---	131/130C	---	127n/130C	---	128n/130C	---	129n/130C	---
1	7	Pavir.Ab00168.1.p|PACid:30235837	Pavir.Ab00168.1.p|PACid:30235837	1718	88026	97	97	20	20	28.1	5.11	534214	1	0	0	619.627	2474.48	4	2474.47	0.0056	1	25.51	14	30	0.004	R	IINEPTAAAIAYGLDKK	G					File4254 Spectrum287775 scans: 34878	126/130C	---	127c/130C	---	128c/130C	---	129c/130C	---	131/130C	---	127n/130C	---	128n/130C	---	129n/130C	---
1	7	Pavir.Ab00168.1.p|PACid:30235837	Pavir.Ab00168.1.p|PACid:30235837	1718	88026	97	97	20	20	28.1	5.11	534435	1	0	0	826.159	2475.46	3	2475.46	0.0001	1	43.38	28	31	0.0016	R	IINEPTAAAIAYGLDKK	G	Deamidated (NQ)	0.00100000000000000.0			File4250 Spectrum115108 scans: 34357	126/130C	---	127c/130C	---	128c/130C	---	129c/130C	---	131/130C	---	127n/130C	---	128n/130C	---	129n/130C	---
1	7	Pavir.Ab00168.1.p|PACid:30235837	Pavir.Ab00168.1.p|PACid:30235837	1718	88026	97	97	20	20	28.1	5.11	534436	1	0	0	619.871	2475.46	4	2475.46	0.0008	1	27.43	14	31	0.0027	R	IINEPTAAAIAYGLDKK	G	Deamidated (NQ)	0.00100000000000000.0			File4249 Spectrum71046 scans: 34495	126/130C	---	127c/130C	---	128c/130C	---	129c/130C	---	131/130C	---	127n/130C	---	128n/130C	---	129n/130C	---
1	7	Pavir.Ab00168.1.p|PACid:30235837	Pavir.Ab00168.1.p|PACid:30235837	1718	88026	97	97	20	20	28.1	5.11	534437	1	0	0	826.16	2475.46	3	2475.46	0.0013	1	46.13	30	31	0.0014	R	IINEPTAAAIAYGLDKK	G	Deamidated (NQ)	0.00100000000000000.0			File4250 Spectrum115354 scans: 34627	126/130C	---	127c/130C	---	128c/130C	---	129c/130C	---	131/130C	---	127n/130C	---	128n/130C	---	129n/130C	---
1	7	Pavir.Ab00168.1.p|PACid:30235837	Pavir.Ab00168.1.p|PACid:30235837	1718	88026	97	97	20	20	28.1	5.11	534439	1	0	0	826.16	2475.46	3	2475.46	0.0022	1	33.16	21	31	0.0033	R	IINEPTAAAIAYGLDKK	G	Deamidated (NQ)	0.00100000000000000.0			File4250 Spectrum115604 scans: 34903	126/130C	---	127c/130C	---	128c/130C	---	129c/130C	---	131/130C	---	127n/130C	---	128n/130C	---	129n/130C	---
1	7	Pavir.Ab00168.1.p|PACid:30235837	Pavir.Ab00168.1.p|PACid:30235837	1718	88026	97	97	20	20	28.1	5.11	534443	1	0	0	826.161	2475.46	3	2475.46	0.0044	1	38.23	16	31	0.0003	R	IINEPTAAAIAYGLDKK	G	Deamidated (NQ)	0.00100000000000000.0			File4249 Spectrum71133 scans: 34589	126/130C	---	127c/130C	---	128c/130C	---	129c/130C	---	131/130C	---	127n/130C	---	128n/130C	---	129n/130C	---
1	7	Pavir.Ab00168.1.p|PACid:30235837	Pavir.Ab00168.1.p|PACid:30235837	1718	88026	97	97	20	20	28.1	5.11	534981	1	0	0	827.13	2478.37	3	2478.36	0.0031	1	35.89	24	34	0.0037	K	KINDAVVTVPAYFNDAQR	Q					File4250 Spectrum109075 scans: 27763	126/130C	---	127c/130C	---	128c/130C	---	129c/130C	---	131/130C	---	127n/130C	---	128n/130C	---	129n/130C	---
1	7	Pavir.Ab00168.1.p|PACid:30235837	Pavir.Ab00168.1.p|PACid:30235837	1718	88026	97	97	20	20	28.1	5.11	534983	1	0	0	827.13	2478.37	3	2478.36	0.0033	1	38.77	21	34	0.00099	K	KINDAVVTVPAYFNDAQR	Q					File4249 Spectrum64578 scans: 27438	126/130C	---	127c/130C	---	128c/130C	---	129c/130C	---	131/130C	---	127n/130C	---	128n/130C	---	129n/130C	---
1	7	Pavir.Ab00168.1.p|PACid:30235837	Pavir.Ab00168.1.p|PACid:30235837	1718	88026	97	97	20	20	28.1	5.11	534984	1	0	0	827.13	2478.37	3	2478.36	0.0033	1	42.21	23	34	0.00066	K	KINDAVVTVPAYFNDAQR	Q					File4249 Spectrum64843 scans: 27725	126/130C	---	127c/130C	---	128c/130C	---	129c/130C	---	131/130C	---	127n/130C	---	128n/130C	---	129n/130C	---
1	7	Pavir.Ab00168.1.p|PACid:30235837	Pavir.Ab00168.1.p|PACid:30235837	1718	88026	97	97	20	20	28.1	5.11	534989	1	0	0	827.13	2478.37	3	2478.36	0.0047	1	28.04	20	34	0.0084	K	KINDAVVTVPAYFNDAQR	Q					File4250 Spectrum108808 scans: 27469	126/130C	---	127c/130C	---	128c/130C	---	129c/130C	---	131/130C	---	127n/130C	---	128n/130C	---	129n/130C	---
1	8	Pavir.Ba01876.1.p|PACid:30289301	Pavir.Ba01876.1.p|PACid:30289301	1540	84682	91	91	25	25	41.4	5.54	61326	1	0	0	598.87	1195.73	2	1195.72	0.0015	0	33.28	24	28	0.0065	K	HLNITLTR	S					File4262 Spectrum593014 scans: 14342	126/130C	---	127c/130C	---	128c/130C	---	129c/130C	---	131/130C	---	127n/130C	---	128n/130C	---	129n/130C	---
1	8	Pavir.Ba01876.1.p|PACid:30289301	Pavir.Ba01876.1.p|PACid:30289301	1540	84682	91	91	25	25	41.4	5.54	67409	1	0	1	609.339	1216.66	2	1216.66	0.0011	0	44.18	23	32	0.00046	K	VIENAEGTR	T					File4248 Spectrum6289 scans: 8759	126/130C	1.496	127c/130C	1.476	128c/130C	1.199	129c/130C	2.144	131/130C	1.047	127n/130C	1.443	128n/130C	1.069	129n/130C	1.227
1	8	Pavir.Ba01876.1.p|PACid:30289301	Pavir.Ba01876.1.p|PACid:30289301	1540	84682	91	91	25	25	41.4	5.54	215203	1	0	0	795.514	1589.01	2	1589.01	0.0015	1	21.86	14	28	0.0089	R	NTTIPTKK	S					File4254 Spectrum265144 scans: 9995	126/130C	---	127c/130C	---	128c/130C	---	129c/130C	---	131/130C	---	127n/130C	---	128n/130C	---	129n/130C	---
1	8	Pavir.Ba01876.1.p|PACid:30289301	Pavir.Ba01876.1.p|PACid:30289301	1540	84682	91	91	25	25	41.4	5.54	215225	1	0	0	795.514	1589.01	2	1589.01	0.0016	1	24.66	14	28	0.0049	R	NTTIPTKK	S					File4254 Spectrum265392 scans: 10269	126/130C	---	127c/130C	---	128c/130C	---	129c/130C	---	131/130C	---	127n/130C	---	128n/130C	---	129n/130C	---
1	8	Pavir.Ba01876.1.p|PACid:30289301	Pavir.Ba01876.1.p|PACid:30289301	1540	84682	91	91	25	25	41.4	5.54	215235	1	0	0	795.514	1589.01	2	1589.01	0.0017	1	24.75	14	28	0.0048	R	NTTIPTKK	S					File4253 Spectrum222379 scans: 10139	126/130C	---	127c/130C	---	128c/130C	---	129c/130C	---	131/130C	---	127n/130C	---	128n/130C	---	129n/130C	---
1	8	Pavir.Ba01876.1.p|PACid:30289301	Pavir.Ba01876.1.p|PACid:30289301	1540	84682	91	91	25	25	41.4	5.54	215711	1	0	0	796.014	1590.01	2	1590	0.0184	1	23.25	15	30	0.0075	R	NTTIPTKK	S	Deamidated (NQ)	0.10000000.0			File4254 Spectrum265638 scans: 10541	126/130C	---	127c/130C	---	128c/130C	---	129c/130C	---	131/130C	---	127n/130C	---	128n/130C	---	129n/130C	---
1	8	Pavir.Ba01876.1.p|PACid:30289301	Pavir.Ba01876.1.p|PACid:30289301	1540	84682	91	91	25	25	41.4	5.54	216442	1	0	0	796.944	1591.87	2	1591.87	0.002	1	45.05		33	0.0035	R	RFDDPQTQK	E					File4252 Spectrum178709 scans: 8988	126/130C	---	127c/130C	---	128c/130C	---	129c/130C	---	131/130C	---	127n/130C	---	128n/130C	---	129n/130C	---
1	8	Pavir.Ba01876.1.p|PACid:30289301	Pavir.Ba01876.1.p|PACid:30289301	1540	84682	91	91	25	25	41.4	5.54	242012	1	0	1	824.945	1647.88	2	1647.87	0.0055	0	41.24	25	33	0.0012	K	DVDEVLLVGGMTR	V	Oxidation (M)	0.0000000000300.0			File4249 Spectrum62802 scans: 25503	126/130C	1.179	127c/130C	1.496	128c/130C	1.203	129c/130C	1.643	131/130C	1.595	127n/130C	1.232	128n/130C	0.996	129n/130C	1.816
1	8	Pavir.Ba01876.1.p|PACid:30289301	Pavir.Ba01876.1.p|PACid:30289301	1540	84682	91	91	25	25	41.4	5.54	242013	1	0	1	824.946	1647.88	2	1647.87	0.0066	0	28.43	20	33	0.009	K	DVDEVLLVGGMTR	V	Oxidation (M)	0.0000000000300.0			File4249 Spectrum62815 scans: 25518	126/130C	0.908	127c/130C	0.993	128c/130C	0.952	129c/130C	1.137	131/130C	1.019	127n/130C	0.976	128n/130C	1.202	129n/130C	0.963
1	8	Pavir.Ba01876.1.p|PACid:30289301	Pavir.Ba01876.1.p|PACid:30289301	1540	84682	91	91	25	25	41.4	5.54	242699	1	0	1	825.486	1648.96	2	1648.96	0.0015	0	29.17	15	33	0.002	R	TTPSVVAFNQK	G					File4264 Spectrum685360 scans: 19531	126/130C	1.065	127c/130C	0.91	128c/130C	0.62	129c/130C	1.591	131/130C	1.036	127n/130C	0.816	128n/130C	0.641	129n/130C	1.133
1	8	Pavir.Ba01876.1.p|PACid:30289301	Pavir.Ba01876.1.p|PACid:30289301	1540	84682	91	91	25	25	41.4	5.54	248831	1	0	1	832.468	1662.92	2	1662.92	0.0022	0	59.55	26	33	2.7e-05	R	SSGGLSEAEIQK	M					File4262 Spectrum594596 scans: 16066	126/130C	1.346	127c/130C	1.173	128c/130C	0.781	129c/130C	1.611	131/130C	1.483	127n/130C	1.002	128n/130C	0.827	129n/130C	1.18
1	8	Pavir.Ba01876.1.p|PACid:30289301	Pavir.Ba01876.1.p|PACid:30289301	1540	84682	91	91	25	25	41.4	5.54	287000	1	0	0	581.327	1740.96	3	1740.96	0.0004	0	42.75	20	33	0.00031	K	MVQEAELHAQK	D					File4251 Spectrum141502 scans: 15193	126/130C	---	127c/130C	---	128c/130C	---	129c/130C	---	131/130C	---	127n/130C	---	128n/130C	---	129n/130C	---
1	8	Pavir.Ba01876.1.p|PACid:30289301	Pavir.Ba01876.1.p|PACid:30289301	1540	84682	91	91	25	25	41.4	5.54	287003	1	0	0	871.488	1740.96	2	1740.96	0.0016	0	59.58	21	33	7.4e-06	K	MVQEAELHAQK	D					File4251 Spectrum141548 scans: 15244	126/130C	---	127c/130C	---	128c/130C	---	129c/130C	---	131/130C	---	127n/130C	---	128n/130C	---	129n/130C	---
1	8	Pavir.Ba01876.1.p|PACid:30289301	Pavir.Ba01876.1.p|PACid:30289301	1540	84682	91	91	25	25	41.4	5.54	294326	1	0	0	586.659	1756.96	3	1756.95	0.0013	0	35.35	17	33	0.00076	K	MVQEAELHAQK	D	Oxidation (M)	0.30000000000.0			File4261 Spectrum545705 scans: 11307	126/130C	---	127c/130C	---	128c/130C	---	129c/130C	---	131/130C	---	127n/130C	---	128n/130C	---	129n/130C	---
1	8	Pavir.Ba01876.1.p|PACid:30289301	Pavir.Ba01876.1.p|PACid:30289301	1540	84682	91	91	25	25	41.4	5.54	294328	1	0	0	879.486	1756.96	2	1756.95	0.002	0	24.71	15	33	0.0058	K	MVQEAELHAQK	D	Oxidation (M)	0.30000000000.0			File4251 Spectrum137439 scans: 10716	126/130C	---	127c/130C	---	128c/130C	---	129c/130C	---	131/130C	---	127n/130C	---	128n/130C	---	129n/130C	---
1	8	Pavir.Ba01876.1.p|PACid:30289301	Pavir.Ba01876.1.p|PACid:30289301	1540	84682	91	91	25	25	41.4	5.54	294329	1	0	0	879.486	1756.96	2	1756.95	0.0022	0	38.42	24	33	0.0018	K	MVQEAELHAQK	D	Oxidation (M)	0.30000000000.0			File4261 Spectrum545793 scans: 11403	126/130C	---	127c/130C	---	128c/130C	---	129c/130C	---	131/130C	---	127n/130C	---	128n/130C	---	129n/130C	---
1	8	Pavir.Ba01876.1.p|PACid:30289301	Pavir.Ba01876.1.p|PACid:30289301	1540	84682	91	91	25	25	41.4	5.54	309567	1	0	0	598.663	1792.97	3	1792.97	0.0003	0	27.05	16	33	0.0046	K	AVITVPAYFNDAQR	Q					File4264 Spectrum693944 scans: 28852	126/130C	---	127c/130C	---	128c/130C	---	129c/130C	---	131/130C	---	127n/130C	---	128n/130C	---	129n/130C	---
1	8	Pavir.Ba01876.1.p|PACid:30289301	Pavir.Ba01876.1.p|PACid:30289301	1540	84682	91	91	25	25	41.4	5.54	309576	1	0	0	598.663	1792.97	3	1792.97	0.0009	0	32.42	21	33	0.004	K	AVITVPAYFNDAQR	Q					File4264 Spectrum693689 scans: 28575	126/130C	---	127c/130C	---	128c/130C	---	129c/130C	---	131/130C	---	127n/130C	---	128n/130C	---	129n/130C	---
1	8	Pavir.Ba01876.1.p|PACid:30289301	Pavir.Ba01876.1.p|PACid:30289301	1540	84682	91	91	25	25	41.4	5.54	309579	1	0	0	897.491	1792.97	2	1792.97	0.001	0	59.46		33	0.00014	K	AVITVPAYFNDAQR	Q					File4263 Spectrum649777 scans: 28241	126/130C	---	127c/130C	---	128c/130C	---	129c/130C	---	131/130C	---	127n/130C	---	128n/130C	---	129n/130C	---
1	8	Pavir.Ba01876.1.p|PACid:30289301	Pavir.Ba01876.1.p|PACid:30289301	1540	84682	91	91	25	25	41.4	5.54	309582	1	0	0	598.663	1792.97	3	1792.97	0.0012	0	34.36	17	33	0.0011	K	AVITVPAYFNDAQR	Q					File4264 Spectrum693437 scans: 28301	126/130C	---	127c/130C	---	128c/130C	---	129c/130C	---	131/130C	---	127n/130C	---	128n/130C	---	129n/130C	---
1	8	Pavir.Ba01876.1.p|PACid:30289301	Pavir.Ba01876.1.p|PACid:30289301	1540	84682	91	91	25	25	41.4	5.54	309583	1	0	0	598.663	1792.97	3	1792.97	0.0012	0	32.26	17	33	0.0017	K	AVITVPAYFNDAQR	Q					File4263 Spectrum649543 scans: 27985	126/130C	---	127c/130C	---	128c/130C	---	129c/130C	---	131/130C	---	127n/130C	---	128n/130C	---	129n/130C	---
1	8	Pavir.Ba01876.1.p|PACid:30289301	Pavir.Ba01876.1.p|PACid:30289301	1540	84682	91	91	25	25	41.4	5.54	309585	1	0	0	897.492	1792.97	2	1792.97	0.0013	0	68.86		33	1.6e-05	K	AVITVPAYFNDAQR	Q					File4263 Spectrum650021 scans: 28510	126/130C	---	127c/130C	---	128c/130C	---	129c/130C	---	131/130C	---	127n/130C	---	128n/130C	---	129n/130C	---
1	8	Pavir.Ba01876.1.p|PACid:30289301	Pavir.Ba01876.1.p|PACid:30289301	1540	84682	91	91	25	25	41.4	5.54	309586	1	0	0	598.664	1792.97	3	1792.97	0.0014	0	28.36	17	33	0.0039	K	AVITVPAYFNDAQR	Q					File4249 Spectrum65245 scans: 28162	126/130C	---	127c/130C	---	128c/130C	---	129c/130C	---	131/130C	---	127n/130C	---	128n/130C	---	129n/130C	---
1	8	Pavir.Ba01876.1.p|PACid:30289301	Pavir.Ba01876.1.p|PACid:30289301	1540	84682	91	91	25	25	41.4	5.54	309587	1	0	0	598.664	1792.97	3	1792.97	0.0014	0	32.76	17	33	0.0016	K	AVITVPAYFNDAQR	Q					File4264 Spectrum693183 scans: 28025	126/130C	---	127c/130C	---	128c/130C	---	129c/130C	---	131/130C	---	127n/130C	---	128n/130C	---	129n/130C	---
1	8	Pavir.Ba01876.1.p|PACid:30289301	Pavir.Ba01876.1.p|PACid:30289301	1540	84682	91	91	25	25	41.4	5.54	309592	1	0	0	598.664	1792.97	3	1792.97	0.0016	0	28.14	20	33	0.0081	K	AVITVPAYFNDAQR	Q					File4263 Spectrum650032 scans: 28522	126/130C	---	127c/130C	---	128c/130C	---	129c/130C	---	131/130C	---	127n/130C	---	128n/130C	---	129n/130C	---
1	8	Pavir.Ba01876.1.p|PACid:30289301	Pavir.Ba01876.1.p|PACid:30289301	1540	84682	91	91	25	25	41.4	5.54	309595	1	0	0	897.492	1792.97	2	1792.97	0.002	0	64.66	33	33	3.7e-05	K	AVITVPAYFNDAQR	Q					File4264 Spectrum693405 scans: 28266	126/130C	---	127c/130C	---	128c/130C	---	129c/130C	---	131/130C	---	127n/130C	---	128n/130C	---	129n/130C	---
1	8	Pavir.Ba01876.1.p|PACid:30289301	Pavir.Ba01876.1.p|PACid:30289301	1540	84682	91	91	25	25	41.4	5.54	309599	1	0	0	598.664	1792.97	3	1792.97	0.0022	0	42.29	19	33	0.00025	K	AVITVPAYFNDAQR	Q					File4263 Spectrum649788 scans: 28253	126/130C	---	127c/130C	---	128c/130C	---	129c/130C	---	131/130C	---	127n/130C	---	128n/130C	---	129n/130C	---
1	8	Pavir.Ba01876.1.p|PACid:30289301	Pavir.Ba01876.1.p|PACid:30289301	1540	84682	91	91	25	25	41.4	5.54	310220	1	0	0	598.991	1793.95	3	1793.95	-0.0013	0	23.14	16	33	0.0097	K	AVITVPAYFNDAQR	Q	Deamidated (NQ)	0.00000000010000.0			File4264 Spectrum694165 scans: 29093	126/130C	---	127c/130C	---	128c/130C	---	129c/130C	---	131/130C	---	127n/130C	---	128n/130C	---	129n/130C	---
1	8	Pavir.Ba01876.1.p|PACid:30289301	Pavir.Ba01876.1.p|PACid:30289301	1540	84682	91	91	25	25	41.4	5.54	310223	1	0	0	598.991	1793.95	3	1793.95	0.0009	0	21.92	14	33	0.0088	K	AVITVPAYFNDAQR	Q	Deamidated (NQ)	0.00000000010000.0			File4260 Spectrum517699 scans: 28971	126/130C	---	127c/130C	---	128c/130C	---	129c/130C	---	131/130C	---	127n/130C	---	128n/130C	---	129n/130C	---
1	8	Pavir.Ba01876.1.p|PACid:30289301	Pavir.Ba01876.1.p|PACid:30289301	1540	84682	91	91	25	25	41.4	5.54	310226	1	0	0	598.992	1793.95	3	1793.95	0.002	0	31.11	18	33	0.0026	K	AVITVPAYFNDAQR	Q	Deamidated (NQ)	0.00000000000010.0			File4259 Spectrum475253 scans: 29719	126/130C	---	127c/130C	---	128c/130C	---	129c/130C	---	131/130C	---	127n/130C	---	128n/130C	---	129n/130C	---
1	8	Pavir.Ba01876.1.p|PACid:30289301	Pavir.Ba01876.1.p|PACid:30289301	1540	84682	91	91	25	25	41.4	5.54	310230	1	0	0	897.984	1793.95	2	1793.95	0.0021	0	79.36	26	33	2.5e-07	K	AVITVPAYFNDAQR	Q	Deamidated (NQ)	0.00000000010000.0			File4259 Spectrum474780 scans: 29187	126/130C	---	127c/130C	---	128c/130C	---	129c/130C	---	131/130C	---	127n/130C	---	128n/130C	---	129n/130C	---
1	8	Pavir.Ba01876.1.p|PACid:30289301	Pavir.Ba01876.1.p|PACid:30289301	1540	84682	91	91	25	25	41.4	5.54	310231	1	0	0	598.992	1793.95	3	1793.95	0.0025	0	29.26	14	33	0.0018	K	AVITVPAYFNDAQR	Q	Deamidated (NQ)	0.00000000010000.0			File4259 Spectrum474804 scans: 29214	126/130C	---	127c/130C	---	128c/130C	---	129c/130C	---	131/130C	---	127n/130C	---	128n/130C	---	129n/130C	---
1	8	Pavir.Ba01876.1.p|PACid:30289301	Pavir.Ba01876.1.p|PACid:30289301	1540	84682	91	91	25	25	41.4	5.54	310232	1	0	0	897.984	1793.95	2	1793.95	0.0026	0	57.52	25	33	3e-05	K	AVITVPAYFNDAQR	Q	Deamidated (NQ)	0.00000000010000.0			File4259 Spectrum475227 scans: 29690	126/130C	---	127c/130C	---	128c/130C	---	129c/130C	---	131/130C	---	127n/130C	---	128n/130C	---	129n/130C	---
1	8	Pavir.Ba01876.1.p|PACid:30289301	Pavir.Ba01876.1.p|PACid:30289301	1540	84682	91	91	25	25	41.4	5.54	310238	1	0	0	598.993	1793.96	3	1793.95	0.0051	0	29.99	16	33	0.0021	K	AVITVPAYFNDAQR	Q	Deamidated (NQ)	0.00000000010000.0			File4259 Spectrum475030 scans: 29468	126/130C	---	127c/130C	---	128c/130C	---	129c/130C	---	131/130C	---	127n/130C	---	128n/130C	---	129n/130C	---
1	8	Pavir.Ba01876.1.p|PACid:30289301	Pavir.Ba01876.1.p|PACid:30289301	1540	84682	91	91	25	25	41.4	5.54	322631	1	0	0	912.035	1822.06	2	1822.06	0.0006	0	41.86	15	32	0.00012	K	LLGEFDLVGIPPAPR	G					File4250 Spectrum120368 scans: 40219	126/130C	---	127c/130C	---	128c/130C	---	129c/130C	---	131/130C	---	127n/130C	---	128n/130C	---	129n/130C	---
1	8	Pavir.Ba01876.1.p|PACid:30289301	Pavir.Ba01876.1.p|PACid:30289301	1540	84682	91	91	25	25	41.4	5.54	322635	1	0	0	608.36	1822.06	3	1822.06	0.0013	0	38.93	21	32	0.001	K	LLGEFDLVGIPPAPR	G					File4250 Spectrum120501 scans: 40370	126/130C	---	127c/130C	---	128c/130C	---	129c/130C	---	131/130C	---	127n/130C	---	128n/130C	---	129n/130C	---
1	8	Pavir.Ba01876.1.p|PACid:30289301	Pavir.Ba01876.1.p|PACid:30289301	1540	84682	91	91	25	25	41.4	5.54	322636	1	0	0	608.36	1822.06	3	1822.06	0.0015	0	32.33	15	32	0.00093	K	LLGEFDLVGIPPAPR	G					File4250 Spectrum121271 scans: 41244	126/130C	---	127c/130C	---	128c/130C	---	129c/130C	---	131/130C	---	127n/130C	---	128n/130C	---	129n/130C	---
1	8	Pavir.Ba01876.1.p|PACid:30289301	Pavir.Ba01876.1.p|PACid:30289301	1540	84682	91	91	25	25	41.4	5.54	322639	1	0	0	912.036	1822.06	2	1822.06	0.0016	0	36.18	15	32	0.0004	K	LLGEFDLVGIPPAPR	G					File4250 Spectrum120143 scans: 39965	126/130C	---	127c/130C	---	128c/130C	---	129c/130C	---	131/130C	---	127n/130C	---	128n/130C	---	129n/130C	---
1	8	Pavir.Ba01876.1.p|PACid:30289301	Pavir.Ba01876.1.p|PACid:30289301	1540	84682	91	91	25	25	41.4	5.54	322640	1	0	0	608.36	1822.06	3	1822.06	0.0017	0	37.67	23	32	0.0021	K	LLGEFDLVGIPPAPR	G					File4250 Spectrum120722 scans: 40620	126/130C	---	127c/130C	---	128c/130C	---	129c/130C	---	131/130C	---	127n/130C	---	128n/130C	---	129n/130C	---
1	8	Pavir.Ba01876.1.p|PACid:30289301	Pavir.Ba01876.1.p|PACid:30289301	1540	84682	91	91	25	25	41.4	5.54	322641	1	0	0	608.36	1822.06	3	1822.06	0.0017	0	27.58	19	32	0.0073	K	LLGEFDLVGIPPAPR	G					File4249 Spectrum76003 scans: 39999	126/130C	---	127c/130C	---	128c/130C	---	129c/130C	---	131/130C	---	127n/130C	---	128n/130C	---	129n/130C	---
1	8	Pavir.Ba01876.1.p|PACid:30289301	Pavir.Ba01876.1.p|PACid:30289301	1540	84682	91	91	25	25	41.4	5.54	322643	1	0	0	912.036	1822.06	2	1822.06	0.0017	0	38.64	20	32	0.0008	K	LLGEFDLVGIPPAPR	G					File4250 Spectrum120608 scans: 40491	126/130C	---	127c/130C	---	128c/130C	---	129c/130C	---	131/130C	---	127n/130C	---	128n/130C	---	129n/130C	---
1	8	Pavir.Ba01876.1.p|PACid:30289301	Pavir.Ba01876.1.p|PACid:30289301	1540	84682	91	91	25	25	41.4	5.54	323869	1	0	1	913.999	1825.98	2	1825.98	-0.0001	0	24.02	14	33	0.0056	R	NNADTTIYSIEK	S					File4249 Spectrum58188 scans: 20479	126/130C	1.054	127c/130C	1.129	128c/130C	1.281	129c/130C	1.406	131/130C	1.285	127n/130C	1.185	128n/130C	1.092	129n/130C	1.284
1	8	Pavir.Ba01876.1.p|PACid:30289301	Pavir.Ba01876.1.p|PACid:30289301	1540	84682	91	91	25	25	41.4	5.54	323874	1	0	1	609.669	1825.99	3	1825.98	0.0036	0	21.58	14	33	0.0098	R	NNADTTIYSIEK	S					File4250 Spectrum102693 scans: 20818	126/130C	1	127c/130C	0.969	128c/130C	0.903	129c/130C	1.17	131/130C	1.088	127n/130C	0.92	128n/130C	0.675	129n/130C	1.009
1	8	Pavir.Ba01876.1.p|PACid:30289301	Pavir.Ba01876.1.p|PACid:30289301	1540	84682	91	91	25	25	41.4	5.54	377175	1	0	0	654.04	1959.1	3	1959.1	0.002	1	25.44	14	33	0.0041	K	MKETAESYLGK	S	Oxidation (M)	0.30000000000.0			File4260 Spectrum507139 scans: 17482	126/130C	---	127c/130C	---	128c/130C	---	129c/130C	---	131/130C	---	127n/130C	---	128n/130C	---	129n/130C	---
1	8	Pavir.Ba01876.1.p|PACid:30289301	Pavir.Ba01876.1.p|PACid:30289301	1540	84682	91	91	25	25	41.4	5.54	377176	1	0	0	654.04	1959.1	3	1959.1	0.0024	1	26.85	14	33	0.003	K	MKETAESYLGK	S	Oxidation (M)	0.30000000000.0			File4250 Spectrum99653 scans: 17517	126/130C	---	127c/130C	---	128c/130C	---	129c/130C	---	131/130C	---	127n/130C	---	128n/130C	---	129n/130C	---
1	8	Pavir.Ba01876.1.p|PACid:30289301	Pavir.Ba01876.1.p|PACid:30289301	1540	84682	91	91	25	25	41.4	5.54	387220	1	0	0	661.716	1982.13	3	1982.12	0.0014	0	27.48	16	33	0.0041	K	QYSPSQVGAFVLTK	M					File4252 Spectrum198019 scans: 30257	126/130C	---	127c/130C	---	128c/130C	---	129c/130C	---	131/130C	---	127n/130C	---	128n/130C	---	129n/130C	---
1	8	Pavir.Ba01876.1.p|PACid:30289301	Pavir.Ba01876.1.p|PACid:30289301	1540	84682	91	91	25	25	41.4	5.54	387222	1	0	0	661.716	1982.13	3	1982.12	0.0025	0	30.39	19	33	0.0042	K	QYSPSQVGAFVLTK	M					File4252 Spectrum198254 scans: 30519	126/130C	---	127c/130C	---	128c/130C	---	129c/130C	---	131/130C	---	127n/130C	---	128n/130C	---	129n/130C	---
1	8	Pavir.Ba01876.1.p|PACid:30289301	Pavir.Ba01876.1.p|PACid:30289301	1540	84682	91	91	25	25	41.4	5.54	397421	1	0	0	1006.05	2010.09	2	2010.09	0	0	30.26	19	34	0.0043	R	QAVTNPQNTFFGTK	R					File4249 Spectrum60621 scans: 23123	126/130C	---	127c/130C	---	128c/130C	---	129c/130C	---	131/130C	---	127n/130C	---	128n/130C	---	129n/130C	---
1	8	Pavir.Ba01876.1.p|PACid:30289301	Pavir.Ba01876.1.p|PACid:30289301	1540	84682	91	91	25	25	41.4	5.54	397423	1	0	0	671.039	2010.1	3	2010.09	0.0028	0	26.12	17	34	0.0061	R	QAVTNPQNTFFGTK	R					File4249 Spectrum60876 scans: 23400	126/130C	---	127c/130C	---	128c/130C	---	129c/130C	---	131/130C	---	127n/130C	---	128n/130C	---	129n/130C	---
1	8	Pavir.Ba01876.1.p|PACid:30289301	Pavir.Ba01876.1.p|PACid:30289301	1540	84682	91	91	25	25	41.4	5.54	397757	1	0	0	671.367	2011.08	3	2011.08	0.0022	0	32.11	15	33	0.00097	R	QAVTNPQNTFFGTK	R	Deamidated (NQ)	0.00000001000000.0			File4259 Spectrum469289 scans: 23114	126/130C	---	127c/130C	---	128c/130C	---	129c/130C	---	131/130C	---	127n/130C	---	128n/130C	---	129n/130C	---
1	8	Pavir.Ba01876.1.p|PACid:30289301	Pavir.Ba01876.1.p|PACid:30289301	1540	84682	91	91	25	25	41.4	5.54	412030	1	0	1	684.362	2050.07	3	2050.06	0.0004	0	32.2	17	33	0.0018	K	SQVFSTAADNQTQVGIR	V					File4252 Spectrum188116 scans: 19353	126/130C	1.11	127c/130C	1.063	128c/130C	1.18	129c/130C	1	131/130C	1.19	127n/130C	1.135	128n/130C	0.824	129n/130C	1.29
1	8	Pavir.Ba01876.1.p|PACid:30289301	Pavir.Ba01876.1.p|PACid:30289301	1540	84682	91	91	25	25	41.4	5.54	412031	1	0	1	684.362	2050.07	3	2050.06	0.0004	0	33.37	19	33	0.0019	K	SQVFSTAADNQTQVGIR	V					File4253 Spectrum230547 scans: 19138	126/130C	0.943	127c/130C	0.772	128c/130C	1.038	129c/130C	1.05	131/130C	0.853	127n/130C	0.838	128n/130C	0.945	129n/130C	0.945
1	8	Pavir.Ba01876.1.p|PACid:30289301	Pavir.Ba01876.1.p|PACid:30289301	1540	84682	91	91	25	25	41.4	5.54	412033	1	0	1	684.363	2050.07	3	2050.06	0.0028	0	40.24	21	33	0.0006	K	SQVFSTAADNQTQVGIR	V					File4252 Spectrum187870 scans: 19084	126/130C	0.874	127c/130C	0.925	128c/130C	0.926	129c/130C	1.184	131/130C	0.787	127n/130C	1.36	128n/130C	0.888	129n/130C	1.288
1	8	Pavir.Ba01876.1.p|PACid:30289301	Pavir.Ba01876.1.p|PACid:30289301	1540	84682	91	91	25	25	41.4	5.54	449286	1	0	0	723.073	2166.2	3	2166.2	0.0007	1	24.8	14	34	0.0047	R	QAVTNPQNTFFGTKR	L					File4253 Spectrum230114 scans: 18668	126/130C	---	127c/130C	---	128c/130C	---	129c/130C	---	131/130C	---	127n/130C	---	128n/130C	---	129n/130C	---
1	8	Pavir.Ba01876.1.p|PACid:30289301	Pavir.Ba01876.1.p|PACid:30289301	1540	84682	91	91	25	25	41.4	5.54	449304	1	0	0	723.074	2166.2	3	2166.2	0.0039	1	32.66	23	34	0.0061	K	RQAVTNPQNTFFGTK	R					File4249 Spectrum56403 scans: 18493	126/130C	---	127c/130C	---	128c/130C	---	129c/130C	---	131/130C	---	127n/130C	---	128n/130C	---	129n/130C	---
1	8	Pavir.Ba01876.1.p|PACid:30289301	Pavir.Ba01876.1.p|PACid:30289301	1540	84682	91	91	25	25	41.4	5.54	449549	1	0	0	723.398	2167.17	3	2167.16	0.0093	0	24.49	16	34	0.0078	K	GVNPDEAVAMGAAIQGGILR	G					File4255 Spectrum330773 scans: 34755	126/130C	---	127c/130C	---	128c/130C	---	129c/130C	---	131/130C	---	127n/130C	---	128n/130C	---	129n/130C	---
1	8	Pavir.Ba01876.1.p|PACid:30289301	Pavir.Ba01876.1.p|PACid:30289301	1540	84682	91	91	25	25	41.4	5.54	455056	1	0	0	728.727	2183.16	3	2183.16	0.0011	0	23.24	15	34	0.0085	K	GVNPDEAVAMGAAIQGGILR	G	Oxidation (M)	0.00000000030000000000.0			File4249 Spectrum64859 scans: 27742	126/130C	---	127c/130C	---	128c/130C	---	129c/130C	---	131/130C	---	127n/130C	---	128n/130C	---	129n/130C	---
1	8	Pavir.Ba01876.1.p|PACid:30289301	Pavir.Ba01876.1.p|PACid:30289301	1540	84682	91	91	25	25	41.4	5.54	455062	1	0	0	728.727	2183.16	3	2183.16	0.0015	0	54.6	23	34	3.7e-05	K	GVNPDEAVAMGAAIQGGILR	G	Oxidation (M)	0.00000000030000000000.0			File4264 Spectrum693182 scans: 28024	126/130C	---	127c/130C	---	128c/130C	---	129c/130C	---	131/130C	---	127n/130C	---	128n/130C	---	129n/130C	---
1	8	Pavir.Ba01876.1.p|PACid:30289301	Pavir.Ba01876.1.p|PACid:30289301	1540	84682	91	91	25	25	41.4	5.54	455063	1	0	0	728.727	2183.16	3	2183.16	0.0015	0	48.96	25	34	0.00022	K	GVNPDEAVAMGAAIQGGILR	G	Oxidation (M)	0.00000000030000000000.0			File4264 Spectrum692940 scans: 27760	126/130C	---	127c/130C	---	128c/130C	---	129c/130C	---	131/130C	---	127n/130C	---	128n/130C	---	129n/130C	---
1	8	Pavir.Ba01876.1.p|PACid:30289301	Pavir.Ba01876.1.p|PACid:30289301	1540	84682	91	91	25	25	41.4	5.54	455070	1	0	0	728.727	2183.16	3	2183.16	0.0024	0	47.35	25	34	0.00036	K	GVNPDEAVAMGAAIQGGILR	G	Oxidation (M)	0.00000000030000000000.0			File4248 Spectrum22678 scans: 26743	126/130C	---	127c/130C	---	128c/130C	---	129c/130C	---	131/130C	---	127n/130C	---	128n/130C	---	129n/130C	---
1	8	Pavir.Ba01876.1.p|PACid:30289301	Pavir.Ba01876.1.p|PACid:30289301	1540	84682	91	91	25	25	41.4	5.54	455072	1	0	0	1092.59	2183.16	2	2183.16	0.0029	0	31.58	18	34	0.0025	K	GVNPDEAVAMGAAIQGGILR	G	Oxidation (M)	0.00000000030000000000.0			File4264 Spectrum693193 scans: 28036	126/130C	---	127c/130C	---	128c/130C	---	129c/130C	---	131/130C	---	127n/130C	---	128n/130C	---	129n/130C	---
1	8	Pavir.Ba01876.1.p|PACid:30289301	Pavir.Ba01876.1.p|PACid:30289301	1540	84682	91	91	25	25	41.4	5.54	455076	1	0	0	1092.59	2183.16	2	2183.16	0.0034	0	48.48	22	34	0.00013	K	GVNPDEAVAMGAAIQGGILR	G	Oxidation (M)	0.00000000030000000000.0			File4248 Spectrum23038 scans: 27139	126/130C	---	127c/130C	---	128c/130C	---	129c/130C	---	131/130C	---	127n/130C	---	128n/130C	---	129n/130C	---
1	8	Pavir.Ba01876.1.p|PACid:30289301	Pavir.Ba01876.1.p|PACid:30289301	1540	84682	91	91	25	25	41.4	5.54	479745	1	0	0	756.082	2265.22	3	2265.21	0.0168	0	25.51	18	34	0.0089	R	IINEPTAAALSYGMNNK	E	Deamidated (NQ)	0.00000000000000100.0			File4250 Spectrum111513 scans: 30415	126/130C	---	127c/130C	---	128c/130C	---	129c/130C	---	131/130C	---	127n/130C	---	128n/130C	---	129n/130C	---
1	8	Pavir.Ba01876.1.p|PACid:30289301	Pavir.Ba01876.1.p|PACid:30289301	1540	84682	91	91	25	25	41.4	5.54	480744	1	0	0	757.404	2269.19	3	2269.19	0.0028	1	34.38	15	34	0.00068	K	MVQEAELHAQKDQER	K					File4263 Spectrum636462 scans: 13685	126/130C	---	127c/130C	---	128c/130C	---	129c/130C	---	131/130C	---	127n/130C	---	128n/130C	---	129n/130C	---
1	8	Pavir.Ba01876.1.p|PACid:30289301	Pavir.Ba01876.1.p|PACid:30289301	1540	84682	91	91	25	25	41.4	5.54	480751	1	0	0	757.405	2269.19	3	2269.19	0.0042	1	47.16	23	34	0.00021	K	MVQEAELHAQKDQER	K					File4263 Spectrum636207 scans: 13409	126/130C	---	127c/130C	---	128c/130C	---	129c/130C	---	131/130C	---	127n/130C	---	128n/130C	---	129n/130C	---
1	8	Pavir.Ba01876.1.p|PACid:30289301	Pavir.Ba01876.1.p|PACid:30289301	1540	84682	91	91	25	25	41.4	5.54	483873	1	0	0	761.081	2280.22	3	2280.22	0.001	0	27.73	17	34	0.0044	R	IINEPTAAALSYGMNNK	E	Oxidation (M)	0.00000000000003000.0			File4261 Spectrum559898 scans: 26746	126/130C	---	127c/130C	---	128c/130C	---	129c/130C	---	131/130C	---	127n/130C	---	128n/130C	---	129n/130C	---
1	8	Pavir.Ba01876.1.p|PACid:30289301	Pavir.Ba01876.1.p|PACid:30289301	1540	84682	91	91	25	25	41.4	5.54	483875	1	0	0	761.081	2280.22	3	2280.22	0.0011	0	33.33	17	34	0.0012	R	IINEPTAAALSYGMNNK	E	Oxidation (M)	0.00000000000003000.0			File4261 Spectrum560389 scans: 27282	126/130C	---	127c/130C	---	128c/130C	---	129c/130C	---	131/130C	---	127n/130C	---	128n/130C	---	129n/130C	---
1	8	Pavir.Ba01876.1.p|PACid:30289301	Pavir.Ba01876.1.p|PACid:30289301	1540	84682	91	91	25	25	41.4	5.54	483878	1	0	0	761.081	2280.22	3	2280.22	0.0015	0	41.92	18	34	0.00021	R	IINEPTAAALSYGMNNK	E	Oxidation (M)	0.00000000000003000.0			File4262 Spectrum604177 scans: 26494	126/130C	---	127c/130C	---	128c/130C	---	129c/130C	---	131/130C	---	127n/130C	---	128n/130C	---	129n/130C	---
1	8	Pavir.Ba01876.1.p|PACid:30289301	Pavir.Ba01876.1.p|PACid:30289301	1540	84682	91	91	25	25	41.4	5.54	483883	1	0	0	761.081	2280.22	3	2280.22	0.002	0	37.03	17	34	0.00054	R	IINEPTAAALSYGMNNK	E	Oxidation (M)	0.00000000000003000.0			File4249 Spectrum63466 scans: 26230	126/130C	---	127c/130C	---	128c/130C	---	129c/130C	---	131/130C	---	127n/130C	---	128n/130C	---	129n/130C	---
1	8	Pavir.Ba01876.1.p|PACid:30289301	Pavir.Ba01876.1.p|PACid:30289301	1540	84682	91	91	25	25	41.4	5.54	483884	1	0	0	761.081	2280.22	3	2280.22	0.002	0	39.1	18	34	0.00045	R	IINEPTAAALSYGMNNK	E	Oxidation (M)	0.00000000000003000.0			File4261 Spectrum560139 scans: 27009	126/130C	---	127c/130C	---	128c/130C	---	129c/130C	---	131/130C	---	127n/130C	---	128n/130C	---	129n/130C	---
1	8	Pavir.Ba01876.1.p|PACid:30289301	Pavir.Ba01876.1.p|PACid:30289301	1540	84682	91	91	25	25	41.4	5.54	483885	1	0	0	761.081	2280.22	3	2280.22	0.0022	0	34.82	18	34	0.0011	R	IINEPTAAALSYGMNNK	E	Oxidation (M)	0.00000000000003000.0			File4249 Spectrum63212 scans: 25955	126/130C	---	127c/130C	---	128c/130C	---	129c/130C	---	131/130C	---	127n/130C	---	128n/130C	---	129n/130C	---
1	8	Pavir.Ba01876.1.p|PACid:30289301	Pavir.Ba01876.1.p|PACid:30289301	1540	84682	91	91	25	25	41.4	5.54	483887	1	0	0	1141.12	2280.22	2	2280.22	0.0026	0	41.45	22	34	0.00059	R	IINEPTAAALSYGMNNK	E	Oxidation (M)	0.00000000000003000.0			File4249 Spectrum63476 scans: 26240	126/130C	---	127c/130C	---	128c/130C	---	129c/130C	---	131/130C	---	127n/130C	---	128n/130C	---	129n/130C	---
1	8	Pavir.Ba01876.1.p|PACid:30289301	Pavir.Ba01876.1.p|PACid:30289301	1540	84682	91	91	25	25	41.4	5.54	483889	1	0	0	761.081	2280.22	3	2280.22	0.0026	0	27.7	19	34	0.0071	R	IINEPTAAALSYGMNNK	E	Oxidation (M)	0.00000000000003000.0			File4249 Spectrum63754 scans: 26543	126/130C	---	127c/130C	---	128c/130C	---	129c/130C	---	131/130C	---	127n/130C	---	128n/130C	---	129n/130C	---
1	8	Pavir.Ba01876.1.p|PACid:30289301	Pavir.Ba01876.1.p|PACid:30289301	1540	84682	91	91	25	25	41.4	5.54	484084	1	0	0	761.409	2281.2	3	2281.2	0.0017	0	30.13	18	34	0.0037	R	IINEPTAAALSYGMNNK	E	Deamidated (NQ); Oxidation (M)	0.00000000000003100.0			File4260 Spectrum516038 scans: 27156	126/130C	---	127c/130C	---	128c/130C	---	129c/130C	---	131/130C	---	127n/130C	---	128n/130C	---	129n/130C	---
1	8	Pavir.Ba01876.1.p|PACid:30289301	Pavir.Ba01876.1.p|PACid:30289301	1540	84682	91	91	25	25	41.4	5.54	484085	1	0	0	761.409	2281.2	3	2281.2	0.0021	0	28.64	18	34	0.0051	R	IINEPTAAALSYGMNNK	E	Deamidated (NQ); Oxidation (M)	0.00000000000003010.0			File4259 Spectrum472858 scans: 27047	126/130C	---	127c/130C	---	128c/130C	---	129c/130C	---	131/130C	---	127n/130C	---	128n/130C	---	129n/130C	---
1	8	Pavir.Ba01876.1.p|PACid:30289301	Pavir.Ba01876.1.p|PACid:30289301	1540	84682	91	91	25	25	41.4	5.54	484109	1	0	0	761.415	2281.22	3	2281.2	0.0213	0	33.02	17	34	0.0015	R	IINEPTAAALSYGMNNK	E	Deamidated (NQ); Oxidation (M)	0.00000000000003010.0			File4250 Spectrum107800 scans: 26369	126/130C	---	127c/130C	---	128c/130C	---	129c/130C	---	131/130C	---	127n/130C	---	128n/130C	---	129n/130C	---
1	8	Pavir.Ba01876.1.p|PACid:30289301	Pavir.Ba01876.1.p|PACid:30289301	1540	84682	91	91	25	25	41.4	5.54	485096	1	0	0	762.736	2285.19	3	2285.18	0.0017	1	46.44	21	34	0.00018	K	MVQEAELHAQKDQER	K	Oxidation (M)	0.300000000000000.0			File4257 Spectrum370414 scans: 10092	126/130C	---	127c/130C	---	128c/130C	---	129c/130C	---	131/130C	---	127n/130C	---	128n/130C	---	129n/130C	---
1	8	Pavir.Ba01876.1.p|PACid:30289301	Pavir.Ba01876.1.p|PACid:30289301	1540	84682	91	91	25	25	41.4	5.54	485101	1	0	0	762.736	2285.19	3	2285.18	0.0027	1	37.45	17	34	0.00055	K	MVQEAELHAQKDQER	K	Oxidation (M)	0.300000000000000.0			File4263 Spectrum632701 scans: 9496	126/130C	---	127c/130C	---	128c/130C	---	129c/130C	---	131/130C	---	127n/130C	---	128n/130C	---	129n/130C	---
1	8	Pavir.Ba01876.1.p|PACid:30289301	Pavir.Ba01876.1.p|PACid:30289301	1540	84682	91	91	25	25	41.4	5.54	485102	1	0	0	572.304	2285.19	4	2285.18	0.0028	1	28.85	20	34	0.0066	K	MVQEAELHAQKDQER	K	Oxidation (M)	0.300000000000000.0			File4263 Spectrum632499 scans: 9263	126/130C	---	127c/130C	---	128c/130C	---	129c/130C	---	131/130C	---	127n/130C	---	128n/130C	---	129n/130C	---
1	8	Pavir.Ba01876.1.p|PACid:30289301	Pavir.Ba01876.1.p|PACid:30289301	1540	84682	91	91	25	25	41.4	5.54	511175	1	0	1	596.851	2383.38	4	2383.37	0.0032	1	32.69	18	32	0.0018	K	IPAEVASEIEAAITDLRK	E					File4264 Spectrum708633 scans: 45173	126/130C	1.023	127c/130C	1.059	128c/130C	0.923	129c/130C	1.138	131/130C	1.06	127n/130C	0.834	128n/130C	0.957	129n/130C	1.062
1	8	Pavir.Ba01876.1.p|PACid:30289301	Pavir.Ba01876.1.p|PACid:30289301	1540	84682	91	91	25	25	41.4	5.54	516811	1	0	1	803.448	2407.32	3	2407.32	-0.0004	1	41.94	15	34	0.00012	K	KSQVFSTAADNQTQVGIR	V					File4250 Spectrum100611 scans: 18553	126/130C	0.897	127c/130C	1.037	128c/130C	1.017	129c/130C	1.378	131/130C	0.974	127n/130C	0.789	128n/130C	0.752	129n/130C	0.822
1	8	Pavir.Ba01876.1.p|PACid:30289301	Pavir.Ba01876.1.p|PACid:30289301	1540	84682	91	91	25	25	41.4	5.54	516815	1	0	1	803.449	2407.32	3	2407.32	0.0015	1	45.16	18	34	0.00011	K	KSQVFSTAADNQTQVGIR	V					File4250 Spectrum100347 scans: 18268	126/130C	1.066	127c/130C	1.144	128c/130C	0.984	129c/130C	1.052	131/130C	1.125	127n/130C	1.105	128n/130C	0.89	129n/130C	1.037
1	8	Pavir.Ba01876.1.p|PACid:30289301	Pavir.Ba01876.1.p|PACid:30289301	1540	84682	91	91	25	25	41.4	5.54	516818	1	0	1	803.449	2407.33	3	2407.32	0.0031	1	40.81	16	34	0.00018	K	KSQVFSTAADNQTQVGIR	V					File4249 Spectrum55945 scans: 17998	126/130C	0.995	127c/130C	0.963	128c/130C	0.899	129c/130C	1.352	131/130C	1.12	127n/130C	0.919	128n/130C	1.03	129n/130C	1.023
1	8	Pavir.Ba01876.1.p|PACid:30289301	Pavir.Ba01876.1.p|PACid:30289301	1540	84682	91	91	25	25	41.4	5.54	516819	1	0	1	602.839	2407.33	4	2407.32	0.0036	1	26.43	15	34	0.0044	K	KSQVFSTAADNQTQVGIR	V					File4249 Spectrum55736 scans: 17771	126/130C	1.032	127c/130C	1.09	128c/130C	1.346	129c/130C	1.196	131/130C	1.025	127n/130C	1.2	128n/130C	0.997	129n/130C	1.298
1	8	Pavir.Ba01876.1.p|PACid:30289301	Pavir.Ba01876.1.p|PACid:30289301	1540	84682	91	91	25	25	41.4	5.54	516824	1	0	1	803.451	2407.33	3	2407.32	0.0092	1	40.7	18	34	0.00029	K	KSQVFSTAADNQTQVGIR	V					File4249 Spectrum55691 scans: 17723	126/130C	1.077	127c/130C	0.93	128c/130C	1.088	129c/130C	1.5	131/130C	1.323	127n/130C	1.037	128n/130C	1.247	129n/130C	1
1	8	Pavir.Ba01876.1.p|PACid:30289301	Pavir.Ba01876.1.p|PACid:30289301	1540	84682	91	91	25	25	41.4	5.54	603754	1	0	0	938.185	2811.53	3	2811.53	0.0026	1	38.98	24	34	0.0018	K	GVNPDEAVAMGAAIQGGILRGDVK	E	Oxidation (M)	0.000000000300000000000000.0			File4262 Spectrum607111 scans: 29687	126/130C	---	127c/130C	---	128c/130C	---	129c/130C	---	131/130C	---	127n/130C	---	128n/130C	---	129n/130C	---
1	8	Pavir.Ba01876.1.p|PACid:30289301	Pavir.Ba01876.1.p|PACid:30289301	1540	84682	91	91	25	25	41.4	5.54	603755	1	0	0	703.891	2811.53	4	2811.53	0.003	1	29.11	17	34	0.0032	K	GVNPDEAVAMGAAIQGGILRGDVK	E	Oxidation (M)	0.000000000300000000000000.0			File4255 Spectrum325560 scans: 29041	126/130C	---	127c/130C	---	128c/130C	---	129c/130C	---	131/130C	---	127n/130C	---	128n/130C	---	129n/130C	---
1	8	Pavir.Ba01876.1.p|PACid:30289301	Pavir.Ba01876.1.p|PACid:30289301	1540	84682	91	91	25	25	41.4	5.54	603761	1	0	0	938.187	2811.54	3	2811.53	0.0077	1	26.56	16	34	0.0046	K	GVNPDEAVAMGAAIQGGILRGDVK	E	Oxidation (M)	0.000000000300000000000000.0			File4262 Spectrum606859 scans: 29413	126/130C	---	127c/130C	---	128c/130C	---	129c/130C	---	131/130C	---	127n/130C	---	128n/130C	---	129n/130C	---
1	8	Pavir.Ba01876.1.p|PACid:30289301	Pavir.Ba01876.1.p|PACid:30289301	1540	84682	91	91	25	25	41.4	5.54	603904	1	0	0	704.142	2812.54	4	2812.52	0.0214	1	27.76	16	34	0.0034	K	GVNPDEAVAMGAAIQGGILRGDVK	E	Deamidated (NQ); Oxidation (M)	0.000000000300001000000000.0			File4255 Spectrum325524 scans: 29001	126/130C	---	127c/130C	---	128c/130C	---	129c/130C	---	131/130C	---	127n/130C	---	128n/130C	---	129n/130C	---
1	8	Pavir.Ba01876.1.p|PACid:30289301	Pavir.Ba01876.1.p|PACid:30289301	1540	84682	91	91	25	25	41.4	5.54	611919	1	0	1	714.922	2855.66	4	2855.66	0.0003	2	31.06	20	30	0.0043	R	DKIPAEVASEIEAAITDLRK	E					File4262 Spectrum620882 scans: 45055	126/130C	1.351	127c/130C	1.488	128c/130C	1.151	129c/130C	1.137	131/130C	1.142	127n/130C	1.504	128n/130C	0.859	129n/130C	1.911
1	8	Pavir.Ba01876.1.p|PACid:30289301	Pavir.Ba01876.1.p|PACid:30289301	1540	84682	91	91	25	25	41.4	5.54	702636	1	0	1	829.201	4140.97	5	4140.94	0.0274	1	35.95	23	34	0.0027	K	IGQHMSGGGSGGSQSGGSQDGGDQSPEAEYEEVKK	-	Deamidated (NQ); Oxidation (M)	0.00003000000001000000000000000000000.0			File4263 Spectrum639157 scans: 16656	126/130C	0.992	127c/130C	0.618	128c/130C	1.161	129c/130C	1.782	131/130C	1.19	127n/130C	0.926	128n/130C	1.168	129n/130C	1.365
1	9	Pavir.Ba01698.1.p|PACid:30291323	Pavir.Ba01698.1.p|PACid:30291323	1341	84721	76	76	22	22	39.3	5.64	49659	1	0	0	567.331	1132.65	2	1132.65	-0.0003	0	40.06		32	0.0094	R	IAGLEVMR	I	Oxidation (M)	0.00000030.0			File4262 Spectrum595378 scans: 16920	126/130C	---	127c/130C	---	128c/130C	---	129c/130C	---	131/130C	---	127n/130C	---	128n/130C	---	129n/130C	---
1	9	Pavir.Ba01698.1.p|PACid:30291323	Pavir.Ba01698.1.p|PACid:30291323	1341	84721	76	76	22	22	39.3	5.64	59373	1	0	0	594.333	1186.65	2	1186.65	0.0016	0	36.76	29	30	0.0099	R	VIENAEGAR	T					File4248 Spectrum6576 scans: 9080	126/130C	---	127c/130C	---	128c/130C	---	129c/130C	---	131/130C	---	127n/130C	---	128n/130C	---	129n/130C	---
1	9	Pavir.Ba01698.1.p|PACid:30291323	Pavir.Ba01698.1.p|PACid:30291323	1341	84721	76	76	22	22	39.3	5.64	59377	1	0	0	594.334	1186.65	2	1186.65	0.0033	0	42.83	27	30	0.0015	R	VIENAEGAR	T					File4248 Spectrum7307 scans: 9905	126/130C	---	127c/130C	---	128c/130C	---	129c/130C	---	131/130C	---	127n/130C	---	128n/130C	---	129n/130C	---
1	9	Pavir.Ba01698.1.p|PACid:30291323	Pavir.Ba01698.1.p|PACid:30291323	1341	84721	76	76	22	22	39.3	5.64	59551	1	0	0	594.826	1187.64	2	1187.63	0.0018	0	47.57	30	31	0.001	R	VIENAEGAR	T	Deamidated (NQ)	0.000100000.0			File4252 Spectrum181174 scans: 11716	126/130C	---	127c/130C	---	128c/130C	---	129c/130C	---	131/130C	---	127n/130C	---	128n/130C	---	129n/130C	---
1	9	Pavir.Ba01698.1.p|PACid:30291323	Pavir.Ba01698.1.p|PACid:30291323	1341	84721	76	76	22	22	39.3	5.64	86967	1	0	0	637.909	1273.8	2	1273.8	0.0015	0	45.09	27	31	0.0009	R	TTPSIVAK	N					File4263 Spectrum636890 scans: 14152	126/130C	---	127c/130C	---	128c/130C	---	129c/130C	---	131/130C	---	127n/130C	---	128n/130C	---	129n/130C	---
1	9	Pavir.Ba01698.1.p|PACid:30291323	Pavir.Ba01698.1.p|PACid:30291323	1341	84721	76	76	22	22	39.3	5.64	112842	1	0	0	674.37	1346.73	2	1346.72	0.0011	0	56.94		32	0.00018	K	EIESAVSDLR	A					File4253 Spectrum231329 scans: 19992	126/130C	---	127c/130C	---	128c/130C	---	129c/130C	---	131/130C	---	127n/130C	---	128n/130C	---	129n/130C	---
1	9	Pavir.Ba01698.1.p|PACid:30291323	Pavir.Ba01698.1.p|PACid:30291323	1341	84721	76	76	22	22	39.3	5.64	126593	1	0	0	692.404	1382.79	2	1382.79	0.0015	0	41.47	22	31	0.00063	R	EAELHAQK	D					File4259 Spectrum455313 scans: 7582	126/130C	---	127c/130C	---	128c/130C	---	129c/130C	---	131/130C	---	127n/130C	---	128n/130C	---	129n/130C	---
1	9	Pavir.Ba01698.1.p|PACid:30291323	Pavir.Ba01698.1.p|PACid:30291323	1341	84721	76	76	22	22	39.3	5.64	152405	1	0	0	722.908	1443.8	2	1443.8	0.0019	0	51.36		31	0.00056	R	QAVTNAQNTIR	G					File4260 Spectrum499296 scans: 8770	126/130C	---	127c/130C	---	128c/130C	---	129c/130C	---	131/130C	---	127n/130C	---	128n/130C	---	129n/130C	---
1	9	Pavir.Ba01698.1.p|PACid:30291323	Pavir.Ba01698.1.p|PACid:30291323	1341	84721	76	76	22	22	39.3	5.64	192873	1	0	0	769.418	1536.82	2	1536.82	0.0014	0	36.93	21	32	0.0014	R	TFDDPQTQK	E					File4249 Spectrum51338 scans: 12998	126/130C	---	127c/130C	---	128c/130C	---	129c/130C	---	131/130C	---	127n/130C	---	128n/130C	---	129n/130C	---
1	9	Pavir.Ba01698.1.p|PACid:30291323	Pavir.Ba01698.1.p|PACid:30291323	1341	84721	76	76	22	22	39.3	5.64	192876	1	0	0	769.418	1536.82	2	1536.82	0.002	0	28.23	14	32	0.0023	R	TFDDPQTQK	E					File4249 Spectrum51593 scans: 13275	126/130C	---	127c/130C	---	128c/130C	---	129c/130C	---	131/130C	---	127n/130C	---	128n/130C	---	129n/130C	---
1	9	Pavir.Ba01698.1.p|PACid:30291323	Pavir.Ba01698.1.p|PACid:30291323	1341	84721	76	76	22	22	39.3	5.64	214553	1	0	0	795.004	1587.99	2	1587.99	0.0016	1	28.72	20	29	0.0073	K	QKLEAANK	A					File4250 Spectrum92222 scans: 9368	126/130C	---	127c/130C	---	128c/130C	---	129c/130C	---	131/130C	---	127n/130C	---	128n/130C	---	129n/130C	---
1	9	Pavir.Ba01698.1.p|PACid:30291323	Pavir.Ba01698.1.p|PACid:30291323	1341	84721	76	76	22	22	39.3	5.64	215203	1	0	0	795.514	1589.01	2	1589.01	0.0015	1	21.86	14	28	0.0089	R	NTTIPTKK	S					File4254 Spectrum265144 scans: 9995	126/130C	---	127c/130C	---	128c/130C	---	129c/130C	---	131/130C	---	127n/130C	---	128n/130C	---	129n/130C	---
1	9	Pavir.Ba01698.1.p|PACid:30291323	Pavir.Ba01698.1.p|PACid:30291323	1341	84721	76	76	22	22	39.3	5.64	215225	1	0	0	795.514	1589.01	2	1589.01	0.0016	1	24.66	14	28	0.0049	R	NTTIPTKK	S					File4254 Spectrum265392 scans: 10269	126/130C	---	127c/130C	---	128c/130C	---	129c/130C	---	131/130C	---	127n/130C	---	128n/130C	---	129n/130C	---
1	9	Pavir.Ba01698.1.p|PACid:30291323	Pavir.Ba01698.1.p|PACid:30291323	1341	84721	76	76	22	22	39.3	5.64	215235	1	0	0	795.514	1589.01	2	1589.01	0.0017	1	24.75	14	28	0.0048	R	NTTIPTKK	S					File4253 Spectrum222379 scans: 10139	126/130C	---	127c/130C	---	128c/130C	---	129c/130C	---	131/130C	---	127n/130C	---	128n/130C	---	129n/130C	---
1	9	Pavir.Ba01698.1.p|PACid:30291323	Pavir.Ba01698.1.p|PACid:30291323	1341	84721	76	76	22	22	39.3	5.64	215711	1	0	0	796.014	1590.01	2	1590	0.0184	1	23.25	15	30	0.0075	R	NTTIPTKK	S	Deamidated (NQ)	0.10000000.0			File4254 Spectrum265638 scans: 10541	126/130C	---	127c/130C	---	128c/130C	---	129c/130C	---	131/130C	---	127n/130C	---	128n/130C	---	129n/130C	---
1	9	Pavir.Ba01698.1.p|PACid:30291323	Pavir.Ba01698.1.p|PACid:30291323	1341	84721	76	76	22	22	39.3	5.64	236274	1	0	0	818.943	1635.87	2	1635.87	0.0003	0	52.83	26	33	0.00013	K	SSGGLSEGDIEK	M					File4257 Spectrum375569 scans: 15808	126/130C	---	127c/130C	---	128c/130C	---	129c/130C	---	131/130C	---	127n/130C	---	128n/130C	---	129n/130C	---
1	9	Pavir.Ba01698.1.p|PACid:30291323	Pavir.Ba01698.1.p|PACid:30291323	1341	84721	76	76	22	22	39.3	5.64	236278	1	0	0	818.944	1635.87	2	1635.87	0.0018	0	57.8	30	33	0.0001	K	SSGGLSEGDIEK	M					File4258 Spectrum418629 scans: 15563	126/130C	---	127c/130C	---	128c/130C	---	129c/130C	---	131/130C	---	127n/130C	---	128n/130C	---	129n/130C	---
1	9	Pavir.Ba01698.1.p|PACid:30291323	Pavir.Ba01698.1.p|PACid:30291323	1341	84721	76	76	22	22	39.3	5.64	236283	1	0	0	546.299	1635.88	3	1635.87	0.0029	0	30.86	21	33	0.0058	K	SSGGLSEGDIEK	M					File4258 Spectrum418607 scans: 15539	126/130C	---	127c/130C	---	128c/130C	---	129c/130C	---	131/130C	---	127n/130C	---	128n/130C	---	129n/130C	---
1	9	Pavir.Ba01698.1.p|PACid:30291323	Pavir.Ba01698.1.p|PACid:30291323	1341	84721	76	76	22	22	39.3	5.64	267527	1	0	0	850.979	1699.94	2	1699.94	0.0008	0	34.92	21	32	0.0024	K	NQNGDLLIGITASR	Q					File4254 Spectrum277890 scans: 23941	126/130C	---	127c/130C	---	128c/130C	---	129c/130C	---	131/130C	---	127n/130C	---	128n/130C	---	129n/130C	---
1	9	Pavir.Ba01698.1.p|PACid:30291323	Pavir.Ba01698.1.p|PACid:30291323	1341	84721	76	76	22	22	39.3	5.64	267532	1	0	0	567.656	1699.95	3	1699.94	0.0033	0	30.38	19	32	0.0037	K	NQNGDLLIGITASR	Q					File4254 Spectrum277925 scans: 23979	126/130C	---	127c/130C	---	128c/130C	---	129c/130C	---	131/130C	---	127n/130C	---	128n/130C	---	129n/130C	---
1	9	Pavir.Ba01698.1.p|PACid:30291323	Pavir.Ba01698.1.p|PACid:30291323	1341	84721	76	76	22	22	39.3	5.64	267922	1	0	0	567.983	1700.93	3	1700.93	0.0013	0	45.74	25	33	0.00043	K	NQNGDLLIGITASR	Q	Deamidated (NQ)	0.00100000000000.0			File4249 Spectrum63156 scans: 25893	126/130C	---	127c/130C	---	128c/130C	---	129c/130C	---	131/130C	---	127n/130C	---	128n/130C	---	129n/130C	---
1	9	Pavir.Ba01698.1.p|PACid:30291323	Pavir.Ba01698.1.p|PACid:30291323	1341	84721	76	76	22	22	39.3	5.64	267926	1	0	0	851.471	1700.93	2	1700.93	0.0017	0	54.71	25	33	6.2e-05	K	NQNGDLLIGITASR	Q	Deamidated (NQ)	0.00100000000000.0			File4249 Spectrum63155 scans: 25892	126/130C	---	127c/130C	---	128c/130C	---	129c/130C	---	131/130C	---	127n/130C	---	128n/130C	---	129n/130C	---
1	9	Pavir.Ba01698.1.p|PACid:30291323	Pavir.Ba01698.1.p|PACid:30291323	1341	84721	76	76	22	22	39.3	5.64	267927	1	0	0	567.983	1700.93	3	1700.93	0.0019	0	39.96	22	33	0.00082	K	NQNGDLLIGITASR	Q	Deamidated (NQ)	0.00100000000000.0			File4249 Spectrum62902 scans: 25616	126/130C	---	127c/130C	---	128c/130C	---	129c/130C	---	131/130C	---	127n/130C	---	128n/130C	---	129n/130C	---
1	9	Pavir.Ba01698.1.p|PACid:30291323	Pavir.Ba01698.1.p|PACid:30291323	1341	84721	76	76	22	22	39.3	5.64	267930	1	0	0	851.472	1700.93	2	1700.93	0.0039	0	29.52	21	32	0.0071	K	NQNGDLLIGITASR	Q	Deamidated (NQ)	0.00100000000000.0			File4264 Spectrum691776 scans: 26494	126/130C	---	127c/130C	---	128c/130C	---	129c/130C	---	131/130C	---	127n/130C	---	128n/130C	---	129n/130C	---
1	9	Pavir.Ba01698.1.p|PACid:30291323	Pavir.Ba01698.1.p|PACid:30291323	1341	84721	76	76	22	22	39.3	5.64	309567	1	0	0	598.663	1792.97	3	1792.97	0.0003	0	27.05	16	33	0.0046	K	AVITVPAYFNDAQR	Q					File4264 Spectrum693944 scans: 28852	126/130C	---	127c/130C	---	128c/130C	---	129c/130C	---	131/130C	---	127n/130C	---	128n/130C	---	129n/130C	---
1	9	Pavir.Ba01698.1.p|PACid:30291323	Pavir.Ba01698.1.p|PACid:30291323	1341	84721	76	76	22	22	39.3	5.64	309576	1	0	0	598.663	1792.97	3	1792.97	0.0009	0	32.42	21	33	0.004	K	AVITVPAYFNDAQR	Q					File4264 Spectrum693689 scans: 28575	126/130C	---	127c/130C	---	128c/130C	---	129c/130C	---	131/130C	---	127n/130C	---	128n/130C	---	129n/130C	---
1	9	Pavir.Ba01698.1.p|PACid:30291323	Pavir.Ba01698.1.p|PACid:30291323	1341	84721	76	76	22	22	39.3	5.64	309579	1	0	0	897.491	1792.97	2	1792.97	0.001	0	59.46		33	0.00014	K	AVITVPAYFNDAQR	Q					File4263 Spectrum649777 scans: 28241	126/130C	---	127c/130C	---	128c/130C	---	129c/130C	---	131/130C	---	127n/130C	---	128n/130C	---	129n/130C	---
1	9	Pavir.Ba01698.1.p|PACid:30291323	Pavir.Ba01698.1.p|PACid:30291323	1341	84721	76	76	22	22	39.3	5.64	309582	1	0	0	598.663	1792.97	3	1792.97	0.0012	0	34.36	17	33	0.0011	K	AVITVPAYFNDAQR	Q					File4264 Spectrum693437 scans: 28301	126/130C	---	127c/130C	---	128c/130C	---	129c/130C	---	131/130C	---	127n/130C	---	128n/130C	---	129n/130C	---
1	9	Pavir.Ba01698.1.p|PACid:30291323	Pavir.Ba01698.1.p|PACid:30291323	1341	84721	76	76	22	22	39.3	5.64	309583	1	0	0	598.663	1792.97	3	1792.97	0.0012	0	32.26	17	33	0.0017	K	AVITVPAYFNDAQR	Q					File4263 Spectrum649543 scans: 27985	126/130C	---	127c/130C	---	128c/130C	---	129c/130C	---	131/130C	---	127n/130C	---	128n/130C	---	129n/130C	---
1	9	Pavir.Ba01698.1.p|PACid:30291323	Pavir.Ba01698.1.p|PACid:30291323	1341	84721	76	76	22	22	39.3	5.64	309585	1	0	0	897.492	1792.97	2	1792.97	0.0013	0	68.86		33	1.6e-05	K	AVITVPAYFNDAQR	Q					File4263 Spectrum650021 scans: 28510	126/130C	---	127c/130C	---	128c/130C	---	129c/130C	---	131/130C	---	127n/130C	---	128n/130C	---	129n/130C	---
1	9	Pavir.Ba01698.1.p|PACid:30291323	Pavir.Ba01698.1.p|PACid:30291323	1341	84721	76	76	22	22	39.3	5.64	309586	1	0	0	598.664	1792.97	3	1792.97	0.0014	0	28.36	17	33	0.0039	K	AVITVPAYFNDAQR	Q					File4249 Spectrum65245 scans: 28162	126/130C	---	127c/130C	---	128c/130C	---	129c/130C	---	131/130C	---	127n/130C	---	128n/130C	---	129n/130C	---
1	9	Pavir.Ba01698.1.p|PACid:30291323	Pavir.Ba01698.1.p|PACid:30291323	1341	84721	76	76	22	22	39.3	5.64	309587	1	0	0	598.664	1792.97	3	1792.97	0.0014	0	32.76	17	33	0.0016	K	AVITVPAYFNDAQR	Q					File4264 Spectrum693183 scans: 28025	126/130C	---	127c/130C	---	128c/130C	---	129c/130C	---	131/130C	---	127n/130C	---	128n/130C	---	129n/130C	---
[truncated: 91,567 more rows]
[truncated: 68 more columns]
