# Supplementary material for: Association of Proteomics Changes with Al-Sensitive Root Zones in Switchgrass
Source: Proteomes. 2018 Mar 22;6(2):15. doi: 10.3390/proteomes6020015 (PMC6027131; doi:10.3390/proteomes6020015)
Supplement: Supplementary file 1 [file proteomes-06-00015-s001.zip › Supplementary materials/Mascot_F404766_elongation10plexTMT0820.xlsx]

## Sheet: F404766
Header	--------------------------------------------------------
Search title	Suping_Zhujia_elongation10plexTMT_sequedt_mascot_Node:4
Timestamp	2015-09-13T03:04:33Z
User	Discoverer_RS-BT-PROTEOMICS
Email
Report URI	http://mascot.biotech.cornell.edu/mascot/cgi/master_results.pl?file=../data/20150912/F404766.dat
Peak list data path	File Name: D:\data\20150717_YY_Suping_switchgrass\elongateion\Suping_Zhujia_elongation10plexTMT_MS2F1.raw
Peak list format	Mascot generic
Search type	MIS
Mascot version	2.5.1
Database	SwgrassProteinsV1
Fasta file	Pvirgatum_v1.1_273_protein.fasta
Total sequences	125439
Total residues	39855606
Sequences after taxonomy filter	125439
Number of queries	557480
Decoy	--------------------------------------------------------
Number of matches above identity threshold in search of real database	56948
Number of matches above identity threshold in search of decoy database	743
Number of matches above homology threshold in search of real database	93860
Number of matches above homology threshold in search of decoy database	2061
Fixed modifications	--------------------------------------------------------
Identifier	Name	Delta	Neutral loss
1	Methylthio (C)	45.9877
2	TMT6plex (N-term)	229.163
3	TMT6plex (K)	229.163
Variable modifications	--------------------------------------------------------
Identifier	Name	Delta	Neutral loss(es)
1	Oxidation (M)	15.9949	0	63.9983
2	Deamidated (NQ)	0.984016
Search Parameters	--------------------------------------------------------
Taxonomy filter	All entries
Enzyme	Trypsin
Maximum Missed Cleavages	2
Fixed modifications	Methylthio (C),TMT6plex (N-term),TMT6plex (K)
Quantitation method	TMT 10plex_switchgrass_elongation
Variable modifications	Oxidation (M),Deamidated (NQ)
Peptide Mass Tolerance	10
Peptide Mass Tolerance Units	ppm
Fragment Mass Tolerance	0.05
Fragment Mass Tolerance Units	Da
Mass values	Monoisotopic
Instrument type	Default
Decoy database also searched	1
Format parameters	--------------------------------------------------------
Significance threshold	0.05
Max. number of hits	0
Use MudPIT protein scoring	1
Ions score cut-off	0.05
Include same-set proteins	0
Include sub-set proteins	0
Include unassigned	0
Require bold red	1
Use homology threshold	1
Group protein families	0
Re-score using Percolator	0
Show duplicate peptides	1
Quantitation header	--------------------------------------------------------
Normalisation base	126/127C	0.776132
Normalisation base	127n/127C	0.814157
Normalisation base	128c/127C	0.934636
Normalisation base	128n/127C	0.794793
Normalisation base	129c/127C	0.685042
Normalisation base	129n/127C	0.855818
Normalisation base	130c/127C	0.72574
Normalisation base	130n/127C	0.848171
Normalisation base	131/127C	0.640858
Protein hits	--------------------------------------------------------
prot_hit_num	prot_acc	prot_desc	prot_score	prot_mass	prot_matches	prot_matches_sig	prot_sequences	prot_sequences_sig	prot_cover	prot_pi	pep_query	pep_rank	pep_isbold	pep_isunique	pep_exp_mz	pep_exp_mr	pep_exp_z	pep_calc_mr	pep_delta	pep_miss	pep_score	pep_homol	pep_ident	pep_expect	pep_res_before	pep_seq	pep_res_after	pep_var_mod	pep_var_mod_pos	pep_summed_mod_pos	pep_local_mod_pos
1	Pavir.Aa01274.1.p|PACid:30249038	Pavir.Aa01274.1.p|PACid:30249038	9225	84483	441	441	38	38	43.5	5.96	21338	1	1	0	502.8	1003.59	2	1003.59	-0.0014	0	30.52	25	27	0.018	K	IEGSTLR	V
1	Pavir.Aa01274.1.p|PACid:30249038	Pavir.Aa01274.1.p|PACid:30249038	9225	84483	441	441	38	38	43.5	5.96	22258	1	1	0	506.294	1010.57	2	1010.58	-0.0025	0	31.47	27	29	0.02	R	SFPLYR	F
1	Pavir.Aa01274.1.p|PACid:30249038	Pavir.Aa01274.1.p|PACid:30249038	9225	84483	441	441	38	38	43.5	5.96	22259	1	1	0	506.294	1010.57	2	1010.58	-0.0019	0	33.29		29	0.019	R	SFPLYR	F
1	Pavir.Aa01274.1.p|PACid:30249038	Pavir.Aa01274.1.p|PACid:30249038	9225	84483	441	441	38	38	43.5	5.96	22261	1	1	0	506.294	1010.57	2	1010.58	-0.0016	0	32.01	29	29	0.027	R	SFPLYR	F
1	Pavir.Aa01274.1.p|PACid:30249038	Pavir.Aa01274.1.p|PACid:30249038	9225	84483	441	441	38	38	43.5	5.96	22263	1	1	0	506.294	1010.57	2	1010.58	-0.0014	0	28.06	25	29	0.029	R	SFPLYR	F
1	Pavir.Aa01274.1.p|PACid:30249038	Pavir.Aa01274.1.p|PACid:30249038	9225	84483	441	441	38	38	43.5	5.96	22264	1	1	0	506.294	1010.57	2	1010.58	-0.0014	0	31.89	26	29	0.014	R	SFPLYR	F
1	Pavir.Aa01274.1.p|PACid:30249038	Pavir.Aa01274.1.p|PACid:30249038	9225	84483	441	441	38	38	43.5	5.96	22269	1	1	0	506.295	1010.57	2	1010.58	-0.0004	0	28.71	26	29	0.028	R	SFPLYR	F
1	Pavir.Aa01274.1.p|PACid:30249038	Pavir.Aa01274.1.p|PACid:30249038	9225	84483	441	441	38	38	43.5	5.96	27617	1	1	0	526.284	1050.55	2	1050.55	-0.0018	0	35.4		28	0.0099	K	FEEELR	A
1	Pavir.Aa01274.1.p|PACid:30249038	Pavir.Aa01274.1.p|PACid:30249038	9225	84483	441	441	38	38	43.5	5.96	42800	1	1	1	573.339	1144.66	2	1144.67	-0.0022	0	46.49		28	0.00073	K	DLITAIDR	E
1	Pavir.Aa01274.1.p|PACid:30249038	Pavir.Aa01274.1.p|PACid:30249038	9225	84483	441	441	38	38	43.5	5.96	42801	1	1	1	573.339	1144.66	2	1144.67	-0.002	0	34.97		28	0.01	K	DLITAIDR	E
1	Pavir.Aa01274.1.p|PACid:30249038	Pavir.Aa01274.1.p|PACid:30249038	9225	84483	441	441	38	38	43.5	5.96	42802	1	1	1	573.339	1144.66	2	1144.67	-0.0019	0	49.29		28	0.00038	K	DLITAIDR	E
1	Pavir.Aa01274.1.p|PACid:30249038	Pavir.Aa01274.1.p|PACid:30249038	9225	84483	441	441	38	38	43.5	5.96	42804	1	1	1	573.339	1144.66	2	1144.67	-0.0017	0	23.67	23	28	0.044	K	DLITAIDR	E
1	Pavir.Aa01274.1.p|PACid:30249038	Pavir.Aa01274.1.p|PACid:30249038	9225	84483	441	441	38	38	43.5	5.96	64603	1	1	0	621.379	1240.74	2	1240.75	-0.0023	0	50.46	22	27	8.3e-05	R	VGQVAAVAAAR	D
1	Pavir.Aa01274.1.p|PACid:30249038	Pavir.Aa01274.1.p|PACid:30249038	9225	84483	441	441	38	38	43.5	5.96	64604	1	1	0	621.379	1240.74	2	1240.75	-0.0023	0	61.32		27	2.1e-05	R	VGQVAAVAAAR	D
1	Pavir.Aa01274.1.p|PACid:30249038	Pavir.Aa01274.1.p|PACid:30249038	9225	84483	441	441	38	38	43.5	5.96	64605	1	1	0	621.379	1240.74	2	1240.75	-0.0023	0	25.06	24	27	0.042	R	VGQVAAVAAAR	D
1	Pavir.Aa01274.1.p|PACid:30249038	Pavir.Aa01274.1.p|PACid:30249038	9225	84483	441	441	38	38	43.5	5.96	64610	1	1	0	621.379	1240.74	2	1240.75	-0.0021	0	21.21	14	27	0.01	R	VGQVAAVAAAR	D
1	Pavir.Aa01274.1.p|PACid:30249038	Pavir.Aa01274.1.p|PACid:30249038	9225	84483	441	441	38	38	43.5	5.96	64611	1	1	0	621.379	1240.74	2	1240.75	-0.0021	0	27.17	16	27	0.0044	R	VGQVAAVAAAR	D
1	Pavir.Aa01274.1.p|PACid:30249038	Pavir.Aa01274.1.p|PACid:30249038	9225	84483	441	441	38	38	43.5	5.96	64612	1	1	0	621.379	1240.74	2	1240.75	-0.0021	0	54.48	22	27	2.9e-05	R	VGQVAAVAAAR	D
1	Pavir.Aa01274.1.p|PACid:30249038	Pavir.Aa01274.1.p|PACid:30249038	9225	84483	441	441	38	38	43.5	5.96	64613	1	1	0	621.379	1240.74	2	1240.75	-0.0021	0	73.61	24	27	6.8e-07	R	VGQVAAVAAAR	D
1	Pavir.Aa01274.1.p|PACid:30249038	Pavir.Aa01274.1.p|PACid:30249038	9225	84483	441	441	38	38	43.5	5.96	64621	1	1	0	621.379	1240.74	2	1240.75	-0.0019	0	68.38	23	27	1.8e-06	R	VGQVAAVAAAR	D
1	Pavir.Aa01274.1.p|PACid:30249038	Pavir.Aa01274.1.p|PACid:30249038	9225	84483	441	441	38	38	43.5	5.96	64622	1	1	0	621.379	1240.74	2	1240.75	-0.0019	0	60.78		27	2.4e-05	R	VGQVAAVAAAR	D
1	Pavir.Aa01274.1.p|PACid:30249038	Pavir.Aa01274.1.p|PACid:30249038	9225	84483	441	441	38	38	43.5	5.96	64625	1	1	0	621.379	1240.74	2	1240.75	-0.0018	0	24.91	20	27	0.018	R	VGQVAAVAAAR	D
1	Pavir.Aa01274.1.p|PACid:30249038	Pavir.Aa01274.1.p|PACid:30249038	9225	84483	441	441	38	38	43.5	5.96	64627	1	1	0	621.379	1240.74	2	1240.75	-0.0018	0	51.5	26	27	0.00015	R	VGQVAAVAAAR	D
1	Pavir.Aa01274.1.p|PACid:30249038	Pavir.Aa01274.1.p|PACid:30249038	9225	84483	441	441	38	38	43.5	5.96	64629	1	1	0	621.379	1240.74	2	1240.75	-0.0018	0	53.32	25	27	8.9e-05	R	VGQVAAVAAAR	D
1	Pavir.Aa01274.1.p|PACid:30249038	Pavir.Aa01274.1.p|PACid:30249038	9225	84483	441	441	38	38	43.5	5.96	64630	1	1	0	621.379	1240.74	2	1240.75	-0.0018	0	41.72	23	27	0.00084	R	VGQVAAVAAAR	D
1	Pavir.Aa01274.1.p|PACid:30249038	Pavir.Aa01274.1.p|PACid:30249038	9225	84483	441	441	38	38	43.5	5.96	64631	1	1	0	621.379	1240.74	2	1240.75	-0.0018	0	55.82		27	7.5e-05	R	VGQVAAVAAAR	D
1	Pavir.Aa01274.1.p|PACid:30249038	Pavir.Aa01274.1.p|PACid:30249038	9225	84483	441	441	38	38	43.5	5.96	64632	1	1	0	621.379	1240.74	2	1240.75	-0.0018	0	59.8		27	3e-05	R	VGQVAAVAAAR	D
1	Pavir.Aa01274.1.p|PACid:30249038	Pavir.Aa01274.1.p|PACid:30249038	9225	84483	441	441	38	38	43.5	5.96	64633	1	1	0	414.589	1240.74	3	1240.75	-0.0018	0	39.12		27	0.0035	R	VGQVAAVAAAR	D
1	Pavir.Aa01274.1.p|PACid:30249038	Pavir.Aa01274.1.p|PACid:30249038	9225	84483	441	441	38	38	43.5	5.96	64636	1	1	0	621.379	1240.74	2	1240.75	-0.0017	0	53.8	25	27	6.9e-05	R	VGQVAAVAAAR	D
1	Pavir.Aa01274.1.p|PACid:30249038	Pavir.Aa01274.1.p|PACid:30249038	9225	84483	441	441	38	38	43.5	5.96	64637	1	1	0	621.379	1240.74	2	1240.75	-0.0017	0	62.88		27	1.5e-05	R	VGQVAAVAAAR	D
1	Pavir.Aa01274.1.p|PACid:30249038	Pavir.Aa01274.1.p|PACid:30249038	9225	84483	441	441	38	38	43.5	5.96	64638	1	1	0	414.589	1240.74	3	1240.75	-0.0017	0	52.58		27	0.00016	R	VGQVAAVAAAR	D
1	Pavir.Aa01274.1.p|PACid:30249038	Pavir.Aa01274.1.p|PACid:30249038	9225	84483	441	441	38	38	43.5	5.96	64641	1	1	0	621.379	1240.74	2	1240.75	-0.0016	0	51.24	21	27	5.2e-05	R	VGQVAAVAAAR	D
1	Pavir.Aa01274.1.p|PACid:30249038	Pavir.Aa01274.1.p|PACid:30249038	9225	84483	441	441	38	38	43.5	5.96	64642	1	1	0	621.379	1240.74	2	1240.75	-0.0016	0	57.28	23	27	1.9e-05	R	VGQVAAVAAAR	D
1	Pavir.Aa01274.1.p|PACid:30249038	Pavir.Aa01274.1.p|PACid:30249038	9225	84483	441	441	38	38	43.5	5.96	64643	1	1	0	621.379	1240.74	2	1240.75	-0.0016	0	58.82	23	27	1.4e-05	R	VGQVAAVAAAR	D
1	Pavir.Aa01274.1.p|PACid:30249038	Pavir.Aa01274.1.p|PACid:30249038	9225	84483	441	441	38	38	43.5	5.96	64644	1	1	0	414.589	1240.74	3	1240.75	-0.0015	0	46.93	25	27	0.00038	R	VGQVAAVAAAR	D
1	Pavir.Aa01274.1.p|PACid:30249038	Pavir.Aa01274.1.p|PACid:30249038	9225	84483	441	441	38	38	43.5	5.96	64648	1	1	0	621.379	1240.74	2	1240.75	-0.0015	0	28.27	23	27	0.017	R	VGQVAAVAAAR	D
1	Pavir.Aa01274.1.p|PACid:30249038	Pavir.Aa01274.1.p|PACid:30249038	9225	84483	441	441	38	38	43.5	5.96	64649	1	1	0	621.379	1240.74	2	1240.75	-0.0015	0	33.28	18	27	0.0016	R	VGQVAAVAAAR	D
1	Pavir.Aa01274.1.p|PACid:30249038	Pavir.Aa01274.1.p|PACid:30249038	9225	84483	441	441	38	38	43.5	5.96	64650	1	1	0	621.379	1240.74	2	1240.75	-0.0015	0	64.43		27	9.8e-06	R	VGQVAAVAAAR	D
1	Pavir.Aa01274.1.p|PACid:30249038	Pavir.Aa01274.1.p|PACid:30249038	9225	84483	441	441	38	38	43.5	5.96	64651	1	1	0	414.589	1240.74	3	1240.75	-0.0014	0	53.28		27	0.00013	R	VGQVAAVAAAR	D
1	Pavir.Aa01274.1.p|PACid:30249038	Pavir.Aa01274.1.p|PACid:30249038	9225	84483	441	441	38	38	43.5	5.96	64661	1	1	0	621.379	1240.74	2	1240.75	-0.0012	0	57.39	21	27	1.4e-05	R	VGQVAAVAAAR	D
1	Pavir.Aa01274.1.p|PACid:30249038	Pavir.Aa01274.1.p|PACid:30249038	9225	84483	441	441	38	38	43.5	5.96	64662	1	1	0	414.589	1240.74	3	1240.75	-0.0012	0	43.18		27	0.0014	R	VGQVAAVAAAR	D
1	Pavir.Aa01274.1.p|PACid:30249038	Pavir.Aa01274.1.p|PACid:30249038	9225	84483	441	441	38	38	43.5	5.96	64663	1	1	0	621.38	1240.74	2	1240.75	-0.0011	0	51.6	25	27	0.00012	R	VGQVAAVAAAR	D
1	Pavir.Aa01274.1.p|PACid:30249038	Pavir.Aa01274.1.p|PACid:30249038	9225	84483	441	441	38	38	43.5	5.96	64664	1	1	0	621.38	1240.74	2	1240.75	-0.0011	0	56.71		27	6.3e-05	R	VGQVAAVAAAR	D
1	Pavir.Aa01274.1.p|PACid:30249038	Pavir.Aa01274.1.p|PACid:30249038	9225	84483	441	441	38	38	43.5	5.96	64665	1	1	0	414.589	1240.74	3	1240.75	-0.0011	0	14.01	13	27	0.048	R	VGQVAAVAAAR	D
1	Pavir.Aa01274.1.p|PACid:30249038	Pavir.Aa01274.1.p|PACid:30249038	9225	84483	441	441	38	38	43.5	5.96	64673	1	1	0	621.38	1240.74	2	1240.75	-0.0007	0	39.97	21	27	0.00068	R	VGQVAAVAAAR	D
1	Pavir.Aa01274.1.p|PACid:30249038	Pavir.Aa01274.1.p|PACid:30249038	9225	84483	441	441	38	38	43.5	5.96	64674	1	1	0	621.38	1240.74	2	1240.75	-0.0006	0	54.94	27	27	8.8e-05	R	VGQVAAVAAAR	D
1	Pavir.Aa01274.1.p|PACid:30249038	Pavir.Aa01274.1.p|PACid:30249038	9225	84483	441	441	38	38	43.5	5.96	64675	1	1	0	621.38	1240.75	2	1240.75	-0.0004	0	63.76		27	1.2e-05	R	VGQVAAVAAAR	D
1	Pavir.Aa01274.1.p|PACid:30249038	Pavir.Aa01274.1.p|PACid:30249038	9225	84483	441	441	38	38	43.5	5.96	64676	1	1	0	621.38	1240.75	2	1240.75	-0.0001	0	63.8		27	1.2e-05	R	VGQVAAVAAAR	D
1	Pavir.Aa01274.1.p|PACid:30249038	Pavir.Aa01274.1.p|PACid:30249038	9225	84483	441	441	38	38	43.5	5.96	64882	1	1	0	621.87	1241.73	2	1241.73	-0.0031	0	33.96		27	0.012	R	VGQVAAVAAAR	D	Deamidated (NQ)	0.00200000000.0
1	Pavir.Aa01274.1.p|PACid:30249038	Pavir.Aa01274.1.p|PACid:30249038	9225	84483	441	441	38	38	43.5	5.96	67383	1	1	0	626.37	1250.73	2	1250.73	-0.0019	0	15.69	14	29	0.039	R	EPSVFSK	I
1	Pavir.Aa01274.1.p|PACid:30249038	Pavir.Aa01274.1.p|PACid:30249038	9225	84483	441	441	38	38	43.5	5.96	76631	1	1	1	641.36	1280.71	2	1280.71	-0.0021	0	79.13	26	29	2.9e-07	K	LAGIDGGFFR	L
1	Pavir.Aa01274.1.p|PACid:30249038	Pavir.Aa01274.1.p|PACid:30249038	9225	84483	441	441	38	38	43.5	5.96	76650	1	1	1	641.361	1280.71	2	1280.71	-0.0007	0	49.16	23	29	0.00015	K	LAGIDGGFFR	L
1	Pavir.Aa01274.1.p|PACid:30249038	Pavir.Aa01274.1.p|PACid:30249038	9225	84483	441	441	38	38	43.5	5.96	85615	1	1	0	654.88	1307.75	2	1307.75	-0.0028	0	31.5		30	0.042	K	VDAAEAFK	L
1	Pavir.Aa01274.1.p|PACid:30249038	Pavir.Aa01274.1.p|PACid:30249038	9225	84483	441	441	38	38	43.5	5.96	85623	1	1	0	654.881	1307.75	2	1307.75	-0.0023	0	33.56		30	0.026	K	VDAAEAFK	L
1	Pavir.Aa01274.1.p|PACid:30249038	Pavir.Aa01274.1.p|PACid:30249038	9225	84483	441	441	38	38	43.5	5.96	85632	1	1	0	654.881	1307.75	2	1307.75	-0.0012	0	28.37	25	30	0.023	K	VDAAEAFK	L
1	Pavir.Aa01274.1.p|PACid:30249038	Pavir.Aa01274.1.p|PACid:30249038	9225	84483	441	441	38	38	43.5	5.96	88710	1	1	0	659.907	1317.8	2	1317.8	-0.0024	0	27.99	24	30	0.021	K	NTVTQVAK	K
1	Pavir.Aa01274.1.p|PACid:30249038	Pavir.Aa01274.1.p|PACid:30249038	9225	84483	441	441	38	38	43.5	5.96	88713	1	1	0	659.907	1317.8	2	1317.8	-0.0021	0	33.6	25	30	0.0077	K	NTVTQVAK	K
1	Pavir.Aa01274.1.p|PACid:30249038	Pavir.Aa01274.1.p|PACid:30249038	9225	84483	441	441	38	38	43.5	5.96	88723	1	1	0	659.908	1317.8	2	1317.8	-0.0016	0	26.45	17	31	0.0066	K	NTVTQVAK	K
1	Pavir.Aa01274.1.p|PACid:30249038	Pavir.Aa01274.1.p|PACid:30249038	9225	84483	441	441	38	38	43.5	5.96	88728	1	1	0	659.908	1317.8	2	1317.8	-0.0011	0	38.45	25	31	0.0025	K	NTVTQVAK	K
1	Pavir.Aa01274.1.p|PACid:30249038	Pavir.Aa01274.1.p|PACid:30249038	9225	84483	441	441	38	38	43.5	5.96	94384	1	1	0	447.602	1339.78	3	1339.79	-0.0025	0	38.31		28	0.0058	R	HLEENIK	T
1	Pavir.Aa01274.1.p|PACid:30249038	Pavir.Aa01274.1.p|PACid:30249038	9225	84483	441	441	38	38	43.5	5.96	94395	1	1	0	670.899	1339.78	2	1339.79	-0.002	0	34.22	26	29	0.0087	R	HLEENIK	T
1	Pavir.Aa01274.1.p|PACid:30249038	Pavir.Aa01274.1.p|PACid:30249038	9225	84483	441	441	38	38	43.5	5.96	94401	1	1	0	447.602	1339.78	3	1339.79	-0.0017	0	18.64	17	29	0.035	R	HLEENIK	T
1	Pavir.Aa01274.1.p|PACid:30249038	Pavir.Aa01274.1.p|PACid:30249038	9225	84483	441	441	38	38	43.5	5.96	94402	1	1	0	670.9	1339.78	2	1339.79	-0.0016	0	31.71		29	0.029	R	HLEENIK	T
1	Pavir.Aa01274.1.p|PACid:30249038	Pavir.Aa01274.1.p|PACid:30249038	9225	84483	441	441	38	38	43.5	5.96	119089	1	1	0	709.436	1416.86	2	1416.86	-0.0027	0	47.26		31	0.0013	K	TAEAVDILK	L
1	Pavir.Aa01274.1.p|PACid:30249038	Pavir.Aa01274.1.p|PACid:30249038	9225	84483	441	441	38	38	43.5	5.96	126907	1	1	0	720.423	1438.83	2	1438.83	-0.0033	0	54.3	25	30	6e-05	K	DGPALQVELLR	H
1	Pavir.Aa01274.1.p|PACid:30249038	Pavir.Aa01274.1.p|PACid:30249038	9225	84483	441	441	38	38	43.5	5.96	126908	1	1	0	480.618	1438.83	3	1438.83	-0.0031	0	52.56	26	30	0.00013	K	DGPALQVELLR	H
1	Pavir.Aa01274.1.p|PACid:30249038	Pavir.Aa01274.1.p|PACid:30249038	9225	84483	441	441	38	38	43.5	5.96	126910	1	1	0	720.423	1438.83	2	1438.83	-0.003	0	16.23	15	30	0.044	K	DGPALQVELLR	H
1	Pavir.Aa01274.1.p|PACid:30249038	Pavir.Aa01274.1.p|PACid:30249038	9225	84483	441	441	38	38	43.5	5.96	126914	1	1	0	720.423	1438.83	2	1438.83	-0.0023	0	61.57	27	30	2.2e-05	K	DGPALQVELLR	H
1	Pavir.Aa01274.1.p|PACid:30249038	Pavir.Aa01274.1.p|PACid:30249038	9225	84483	441	441	38	38	43.5	5.96	126915	1	1	0	480.618	1438.83	3	1438.83	-0.0022	0	69.24	27	30	3.7e-06	K	DGPALQVELLR	H
1	Pavir.Aa01274.1.p|PACid:30249038	Pavir.Aa01274.1.p|PACid:30249038	9225	84483	441	441	38	38	43.5	5.96	126918	1	1	0	480.618	1438.83	3	1438.83	-0.0018	0	45.36	23	30	0.00031	K	DGPALQVELLR	H
1	Pavir.Aa01274.1.p|PACid:30249038	Pavir.Aa01274.1.p|PACid:30249038	9225	84483	441	441	38	38	43.5	5.96	126921	1	1	0	720.424	1438.83	2	1438.83	-0.0017	0	42.75	21	30	0.0004	K	DGPALQVELLR	H
1	Pavir.Aa01274.1.p|PACid:30249038	Pavir.Aa01274.1.p|PACid:30249038	9225	84483	441	441	38	38	43.5	5.96	126924	1	1	0	720.424	1438.83	2	1438.83	-0.0015	0	33.04	25	30	0.0081	K	DGPALQVELLR	H
1	Pavir.Aa01274.1.p|PACid:30249038	Pavir.Aa01274.1.p|PACid:30249038	9225	84483	441	441	38	38	43.5	5.96	126925	1	1	0	720.424	1438.83	2	1438.83	-0.0013	0	67.86	29	30	7.5e-06	K	DGPALQVELLR	H
1	Pavir.Aa01274.1.p|PACid:30249038	Pavir.Aa01274.1.p|PACid:30249038	9225	84483	441	441	38	38	43.5	5.96	126927	1	1	0	720.424	1438.83	2	1438.83	-0.0008	0	48.06	25	30	0.00028	K	DGPALQVELLR	H
1	Pavir.Aa01274.1.p|PACid:30249038	Pavir.Aa01274.1.p|PACid:30249038	9225	84483	441	441	38	38	43.5	5.96	126928	1	1	0	720.424	1438.83	2	1438.83	-0.0004	0	37.73		30	0.0091	K	DGPALQVELLR	H
1	Pavir.Aa01274.1.p|PACid:30249038	Pavir.Aa01274.1.p|PACid:30249038	9225	84483	441	441	38	38	43.5	5.96	127135	1	1	1	480.925	1439.75	3	1439.76	-0.0036	0	32.27	15	28	0.00094	R	DGHTLPSETVR	A
1	Pavir.Aa01274.1.p|PACid:30249038	Pavir.Aa01274.1.p|PACid:30249038	9225	84483	441	441	38	38	43.5	5.96	127137	1	1	1	720.884	1439.75	2	1439.76	-0.0035	0	44.65	27	28	0.00088	R	DGHTLPSETVR	A
1	Pavir.Aa01274.1.p|PACid:30249038	Pavir.Aa01274.1.p|PACid:30249038	9225	84483	441	441	38	38	43.5	5.96	127140	1	1	1	480.925	1439.75	3	1439.76	-0.0025	0	29.35	14	28	0.0018	R	DGHTLPSETVR	A
1	Pavir.Aa01274.1.p|PACid:30249038	Pavir.Aa01274.1.p|PACid:30249038	9225	84483	441	441	38	38	43.5	5.96	127143	1	1	1	720.885	1439.76	2	1439.76	-0.0009	0	34.25	22	28	0.0037	R	DGHTLPSETVR	A
1	Pavir.Aa01274.1.p|PACid:30249038	Pavir.Aa01274.1.p|PACid:30249038	9225	84483	441	441	38	38	43.5	5.96	127682	1	1	1	481.594	1441.76	3	1441.76	-0.0033	0	40.34	15	28	0.00016	R	HLNAGIFGNDR	D
1	Pavir.Aa01274.1.p|PACid:30249038	Pavir.Aa01274.1.p|PACid:30249038	9225	84483	441	441	38	38	43.5	5.96	127683	1	1	1	721.888	1441.76	2	1441.76	-0.0023	0	60.13	25	28	1.8e-05	R	HLNAGIFGNDR	D
1	Pavir.Aa01274.1.p|PACid:30249038	Pavir.Aa01274.1.p|PACid:30249038	9225	84483	441	441	38	38	43.5	5.96	127687	1	1	1	721.888	1441.76	2	1441.76	-0.001	0	43.58	25	29	0.00071	R	HLNAGIFGNDR	D
1	Pavir.Aa01274.1.p|PACid:30249038	Pavir.Aa01274.1.p|PACid:30249038	9225	84483	441	441	38	38	43.5	5.96	127688	1	1	1	481.595	1441.76	3	1441.76	-0.0005	0	57.8	17	28	4.7e-06	R	HLNAGIFGNDR	D
1	Pavir.Aa01274.1.p|PACid:30249038	Pavir.Aa01274.1.p|PACid:30249038	9225	84483	441	441	38	38	43.5	5.96	127957	1	1	1	481.922	1442.75	3	1442.75	-0.0018	0	49	19	28	5.7e-05	R	HLNAGIFGNDR	D	Deamidated (NQ)	0.00200000000.0
1	Pavir.Aa01274.1.p|PACid:30249038	Pavir.Aa01274.1.p|PACid:30249038	9225	84483	441	441	38	38	43.5	5.96	127958	1	1	1	481.923	1442.75	3	1442.75	-0.0013	0	41.93	15	28	0.00012	R	HLNAGIFGNDR	D	Deamidated (NQ)	0.00000000200.0
1	Pavir.Aa01274.1.p|PACid:30249038	Pavir.Aa01274.1.p|PACid:30249038	9225	84483	441	441	38	38	43.5	5.96	131601	1	1	1	485.282	1452.82	3	1452.83	-0.0017	0	47.66	21	29	0.00013	R	VAVAEGAAAVPNR	I
1	Pavir.Aa01274.1.p|PACid:30249038	Pavir.Aa01274.1.p|PACid:30249038	9225	84483	441	441	38	38	43.5	5.96	131602	1	1	1	727.419	1452.82	2	1452.83	-0.0014	0	58.04	19	29	6.4e-06	R	VAVAEGAAAVPNR	I
1	Pavir.Aa01274.1.p|PACid:30249038	Pavir.Aa01274.1.p|PACid:30249038	9225	84483	441	441	38	38	43.5	5.96	131867	1	1	1	727.906	1453.8	2	1453.81	-0.0117	0	28.18	15	29	0.0028	R	VAVAEGAAAVPNR	I	Deamidated (NQ)	0.0000000000020.0
1	Pavir.Aa01274.1.p|PACid:30249038	Pavir.Aa01274.1.p|PACid:30249038	9225	84483	441	441	38	38	43.5	5.96	146774	1	1	0	749.917	1497.82	2	1497.82	-0.0032	0	40.96	29	29	0.0036	R	NPSLDYGFK	G
1	Pavir.Aa01274.1.p|PACid:30249038	Pavir.Aa01274.1.p|PACid:30249038	9225	84483	441	441	38	38	43.5	5.96	146775	1	1	0	749.917	1497.82	2	1497.82	-0.0032	0	36.01	27	29	0.0076	R	NPSLDYGFK	G
1	Pavir.Aa01274.1.p|PACid:30249038	Pavir.Aa01274.1.p|PACid:30249038	9225	84483	441	441	38	38	43.5	5.96	146776	1	1	0	749.917	1497.82	2	1497.82	-0.003	0	58.33		29	6.7e-05	R	NPSLDYGFK	G
1	Pavir.Aa01274.1.p|PACid:30249038	Pavir.Aa01274.1.p|PACid:30249038	9225	84483	441	441	38	38	43.5	5.96	146777	1	1	0	749.918	1497.82	2	1497.82	-0.0026	0	44.74		29	0.0016	R	NPSLDYGFK	G
1	Pavir.Aa01274.1.p|PACid:30249038	Pavir.Aa01274.1.p|PACid:30249038	9225	84483	441	441	38	38	43.5	5.96	146778	1	1	0	749.918	1497.82	2	1497.82	-0.0022	0	30.22	24	29	0.014	R	NPSLDYGFK	G
1	Pavir.Aa01274.1.p|PACid:30249038	Pavir.Aa01274.1.p|PACid:30249038	9225	84483	441	441	38	38	43.5	5.96	146779	1	1	0	500.281	1497.82	3	1497.82	-0.0021	0	25.29	22	29	0.027	R	NPSLDYGFK	G
1	Pavir.Aa01274.1.p|PACid:30249038	Pavir.Aa01274.1.p|PACid:30249038	9225	84483	441	441	38	38	43.5	5.96	146781	1	1	0	749.918	1497.82	2	1497.82	-0.0017	0	37.7		29	0.0081	R	NPSLDYGFK	G
1	Pavir.Aa01274.1.p|PACid:30249038	Pavir.Aa01274.1.p|PACid:30249038	9225	84483	441	441	38	38	43.5	5.96	146785	1	1	0	749.918	1497.82	2	1497.82	-0.0016	0	47.39		29	0.00089	R	NPSLDYGFK	G
1	Pavir.Aa01274.1.p|PACid:30249038	Pavir.Aa01274.1.p|PACid:30249038	9225	84483	441	441	38	38	43.5	5.96	146786	1	1	0	500.281	1497.82	3	1497.82	-0.0015	0	26.52	21	29	0.016	R	NPSLDYGFK	G
1	Pavir.Aa01274.1.p|PACid:30249038	Pavir.Aa01274.1.p|PACid:30249038	9225	84483	441	441	38	38	43.5	5.96	146789	1	1	0	500.281	1497.82	3	1497.82	-0.0009	0	32.54	24	29	0.0086	R	NPSLDYGFK	G
1	Pavir.Aa01274.1.p|PACid:30249038	Pavir.Aa01274.1.p|PACid:30249038	9225	84483	441	441	38	38	43.5	5.96	177926	1	1	0	529.973	1586.9	3	1586.9	-0.0011	1	16.67	14	29	0.033	K	FEEELRAVLPR	E
1	Pavir.Aa01274.1.p|PACid:30249038	Pavir.Aa01274.1.p|PACid:30249038	9225	84483	441	441	38	38	43.5	5.96	191523	1	1	0	811.978	1621.94	2	1621.94	-0.0028	1	42.2	29	30	0.0029	K	ITKFEEELR	A
1	Pavir.Aa01274.1.p|PACid:30249038	Pavir.Aa01274.1.p|PACid:30249038	9225	84483	441	441	38	38	43.5	5.96	191537	1	1	0	811.978	1621.94	2	1621.94	-0.0022	1	49.72		30	0.00058	K	ITKFEEELR	A
1	Pavir.Aa01274.1.p|PACid:30249038	Pavir.Aa01274.1.p|PACid:30249038	9225	84483	441	441	38	38	43.5	5.96	191550	1	1	0	811.979	1621.94	2	1621.94	-0.0016	1	45.5		30	0.0015	K	ITKFEEELR	A
1	Pavir.Aa01274.1.p|PACid:30249038	Pavir.Aa01274.1.p|PACid:30249038	9225	84483	441	441	38	38	43.5	5.96	192855	1	1	0	813.964	1625.91	2	1625.92	-0.0046	0	15.15	13	30	0.038	K	EWDGKPLPIN	-
1	Pavir.Aa01274.1.p|PACid:30249038	Pavir.Aa01274.1.p|PACid:30249038	9225	84483	441	441	38	38	43.5	5.96	192865	1	1	0	813.965	1625.92	2	1625.92	-0.0031	0	27.33	14	30	0.0027	K	EWDGKPLPIN	-
1	Pavir.Aa01274.1.p|PACid:30249038	Pavir.Aa01274.1.p|PACid:30249038	9225	84483	441	441	38	38	43.5	5.96	192869	1	1	0	813.965	1625.92	2	1625.92	-0.0029	0	19.6	14	30	0.015	K	EWDGKPLPIN	-
1	Pavir.Aa01274.1.p|PACid:30249038	Pavir.Aa01274.1.p|PACid:30249038	9225	84483	441	441	38	38	43.5	5.96	192872	1	1	0	813.965	1625.92	2	1625.92	-0.0026	0	33.41	15	30	0.00074	K	EWDGKPLPIN	-
1	Pavir.Aa01274.1.p|PACid:30249038	Pavir.Aa01274.1.p|PACid:30249038	9225	84483	441	441	38	38	43.5	5.96	192875	1	1	0	813.965	1625.92	2	1625.92	-0.0024	0	27.98	15	30	0.0028	K	EWDGKPLPIN	-
1	Pavir.Aa01274.1.p|PACid:30249038	Pavir.Aa01274.1.p|PACid:30249038	9225	84483	441	441	38	38	43.5	5.96	207741	1	1	0	555.644	1663.91	3	1663.91	-0.0021	0	26.12	24	31	0.037	K	LVDPMLECLK	E
1	Pavir.Aa01274.1.p|PACid:30249038	Pavir.Aa01274.1.p|PACid:30249038	9225	84483	441	441	38	38	43.5	5.96	207743	1	1	0	555.644	1663.91	3	1663.91	-0.0017	0	26.65	26	30	0.047	K	LVDPMLECLK	E
1	Pavir.Aa01274.1.p|PACid:30249038	Pavir.Aa01274.1.p|PACid:30249038	9225	84483	441	441	38	38	43.5	5.96	208369	1	1	0	833.509	1665	2	1665.01	-0.0035	1	36.93	23	28	0.0022	R	KVDAAEAFK	L
1	Pavir.Aa01274.1.p|PACid:30249038	Pavir.Aa01274.1.p|PACid:30249038	9225	84483	441	441	38	38	43.5	5.96	208377	1	1	0	833.509	1665	2	1665.01	-0.0028	1	38.76		28	0.0048	R	KVDAAEAFK	L
1	Pavir.Aa01274.1.p|PACid:30249038	Pavir.Aa01274.1.p|PACid:30249038	9225	84483	441	441	38	38	43.5	5.96	208378	1	1	0	556.009	1665	3	1665.01	-0.0028	1	24.23	19	28	0.015	R	KVDAAEAFK	L
1	Pavir.Aa01274.1.p|PACid:30249038	Pavir.Aa01274.1.p|PACid:30249038	9225	84483	441	441	38	38	43.5	5.96	208379	1	1	0	556.009	1665	3	1665.01	-0.0028	1	24.39	18	28	0.012	R	KVDAAEAFK	L
1	Pavir.Aa01274.1.p|PACid:30249038	Pavir.Aa01274.1.p|PACid:30249038	9225	84483	441	441	38	38	43.5	5.96	208380	1	1	0	556.009	1665	3	1665.01	-0.0026	1	17.97	14	28	0.021	R	KVDAAEAFK	L
1	Pavir.Aa01274.1.p|PACid:30249038	Pavir.Aa01274.1.p|PACid:30249038	9225	84483	441	441	38	38	43.5	5.96	208387	1	1	0	556.009	1665.01	3	1665.01	-0.0019	1	28.41	21	28	0.0099	R	KVDAAEAFK	L
1	Pavir.Aa01274.1.p|PACid:30249038	Pavir.Aa01274.1.p|PACid:30249038	9225	84483	441	441	38	38	43.5	5.96	208390	1	1	0	833.51	1665.01	2	1665.01	-0.0011	1	25.32	23	28	0.037	R	KVDAAEAFK	L
1	Pavir.Aa01274.1.p|PACid:30249038	Pavir.Aa01274.1.p|PACid:30249038	9225	84483	441	441	38	38	43.5	5.96	214566	1	1	0	560.975	1679.9	3	1679.91	-0.0042	0	37.2	19	30	0.00091	K	LVDPMLECLK	E	Oxidation (M)	0.0000100000.0
1	Pavir.Aa01274.1.p|PACid:30249038	Pavir.Aa01274.1.p|PACid:30249038	9225	84483	441	441	38	38	43.5	5.96	214567	1	1	0	560.975	1679.9	3	1679.91	-0.0039	0	30.11	16	30	0.0021	K	LVDPMLECLK	E	Oxidation (M)	0.0000100000.0
1	Pavir.Aa01274.1.p|PACid:30249038	Pavir.Aa01274.1.p|PACid:30249038	9225	84483	441	441	38	38	43.5	5.96	214568	1	1	0	840.959	1679.9	2	1679.91	-0.0037	0	29.64	18	30	0.0037	K	LVDPMLECLK	E	Oxidation (M)	0.0000100000.0
1	Pavir.Aa01274.1.p|PACid:30249038	Pavir.Aa01274.1.p|PACid:30249038	9225	84483	441	441	38	38	43.5	5.96	214571	1	1	0	560.975	1679.9	3	1679.91	-0.0035	0	34.82	18	30	0.001	K	LVDPMLECLK	E	Oxidation (M)	0.0000100000.0
1	Pavir.Aa01274.1.p|PACid:30249038	Pavir.Aa01274.1.p|PACid:30249038	9225	84483	441	441	38	38	43.5	5.96	214573	1	1	0	840.959	1679.9	2	1679.91	-0.0033	0	25.94	20	30	0.015	K	LVDPMLECLK	E	Oxidation (M)	0.0000100000.0
1	Pavir.Aa01274.1.p|PACid:30249038	Pavir.Aa01274.1.p|PACid:30249038	9225	84483	441	441	38	38	43.5	5.96	214575	1	1	0	560.975	1679.9	3	1679.91	-0.0031	0	45	20	30	0.00018	K	LVDPMLECLK	E	Oxidation (M)	0.0000100000.0
1	Pavir.Aa01274.1.p|PACid:30249038	Pavir.Aa01274.1.p|PACid:30249038	9225	84483	441	441	38	38	43.5	5.96	214576	1	1	0	840.959	1679.9	2	1679.91	-0.003	0	32.94	22	30	0.0041	K	LVDPMLECLK	E	Oxidation (M)	0.0000100000.0
1	Pavir.Aa01274.1.p|PACid:30249038	Pavir.Aa01274.1.p|PACid:30249038	9225	84483	441	441	38	38	43.5	5.96	214578	1	1	0	840.959	1679.9	2	1679.91	-0.0028	0	33.88	20	30	0.0022	K	LVDPMLECLK	E	Oxidation (M)	0.0000100000.0
1	Pavir.Aa01274.1.p|PACid:30249038	Pavir.Aa01274.1.p|PACid:30249038	9225	84483	441	441	38	38	43.5	5.96	214579	1	1	0	560.975	1679.9	3	1679.91	-0.0026	0	40.66	20	30	0.00048	K	LVDPMLECLK	E	Oxidation (M)	0.0000100000.0
1	Pavir.Aa01274.1.p|PACid:30249038	Pavir.Aa01274.1.p|PACid:30249038	9225	84483	441	441	38	38	43.5	5.96	214580	1	1	0	840.959	1679.9	2	1679.91	-0.0026	0	29.7	18	30	0.0034	K	LVDPMLECLK	E	Oxidation (M)	0.0000100000.0
1	Pavir.Aa01274.1.p|PACid:30249038	Pavir.Aa01274.1.p|PACid:30249038	9225	84483	441	441	38	38	43.5	5.96	214591	1	1	0	840.96	1679.9	2	1679.91	-0.0021	0	27.5	16	30	0.0042	K	LVDPMLECLK	E	Oxidation (M)	0.0000100000.0
1	Pavir.Aa01274.1.p|PACid:30249038	Pavir.Aa01274.1.p|PACid:30249038	9225	84483	441	441	38	38	43.5	5.96	214592	1	1	0	560.976	1679.9	3	1679.91	-0.002	0	24.29	16	30	0.0085	K	LVDPMLECLK	E	Oxidation (M)	0.0000100000.0
1	Pavir.Aa01274.1.p|PACid:30249038	Pavir.Aa01274.1.p|PACid:30249038	9225	84483	441	441	38	38	43.5	5.96	214594	1	1	0	840.96	1679.9	2	1679.91	-0.002	0	30.57	20	30	0.0046	K	LVDPMLECLK	E	Oxidation (M)	0.0000100000.0
1	Pavir.Aa01274.1.p|PACid:30249038	Pavir.Aa01274.1.p|PACid:30249038	9225	84483	441	441	38	38	43.5	5.96	214595	1	1	0	560.976	1679.9	3	1679.91	-0.0019	0	33.89	25	30	0.0071	K	LVDPMLECLK	E	Oxidation (M)	0.0000100000.0
1	Pavir.Aa01274.1.p|PACid:30249038	Pavir.Aa01274.1.p|PACid:30249038	9225	84483	441	441	38	38	43.5	5.96	224292	1	1	1	852.96	1703.91	2	1703.91	-0.0021	0	18.17	14	30	0.02	K	VLTMNPTGDLSTAR	F
1	Pavir.Aa01274.1.p|PACid:30249038	Pavir.Aa01274.1.p|PACid:30249038	9225	84483	441	441	38	38	43.5	5.96	224294	1	1	1	852.96	1703.91	2	1703.91	-0.0017	0	41.34	22	30	0.00068	K	VLTMNPTGDLSTAR	F
1	Pavir.Aa01274.1.p|PACid:30249038	Pavir.Aa01274.1.p|PACid:30249038	9225	84483	441	441	38	38	43.5	5.96	224297	1	1	1	852.961	1703.91	2	1703.91	-0.0007	0	42.06	21	30	0.00042	K	VLTMNPTGDLSTAR	F
1	Pavir.Aa01274.1.p|PACid:30249038	Pavir.Aa01274.1.p|PACid:30249038	9225	84483	441	441	38	38	43.5	5.96	230337	1	1	1	860.956	1719.9	2	1719.9	-0.0049	0	80.21	22	30	8.9e-08	K	VLTMNPTGDLSTAR	F	Oxidation (M)	0.00010000000000.0
1	Pavir.Aa01274.1.p|PACid:30249038	Pavir.Aa01274.1.p|PACid:30249038	9225	84483	441	441	38	38	43.5	5.96	230343	1	1	1	860.957	1719.9	2	1719.9	-0.0028	0	46.32	17	30	6.1e-05	K	VLTMNPTGDLSTAR	F	Oxidation (M)	0.00010000000000.0
1	Pavir.Aa01274.1.p|PACid:30249038	Pavir.Aa01274.1.p|PACid:30249038	9225	84483	441	441	38	38	43.5	5.96	230344	1	1	1	860.958	1719.9	2	1719.9	-0.0012	0	29.12	18	30	0.0047	K	VLTMNPTGDLSTAR	F	Oxidation (M)	0.00010000000000.0
1	Pavir.Aa01274.1.p|PACid:30249038	Pavir.Aa01274.1.p|PACid:30249038	9225	84483	441	441	38	38	43.5	5.96	251631	1	1	0	592.378	1774.11	3	1774.12	-0.0038	1	26.38	15	27	0.0045	R	KTAEAVDILK	L
1	Pavir.Aa01274.1.p|PACid:30249038	Pavir.Aa01274.1.p|PACid:30249038	9225	84483	441	441	38	38	43.5	5.96	251633	1	1	0	888.064	1774.11	2	1774.12	-0.0036	1	41.86		27	0.0018	R	KTAEAVDILK	L
1	Pavir.Aa01274.1.p|PACid:30249038	Pavir.Aa01274.1.p|PACid:30249038	9225	84483	441	441	38	38	43.5	5.96	251634	1	1	0	592.379	1774.11	3	1774.12	-0.0035	1	28.17	17	27	0.0041	R	KTAEAVDILK	L
1	Pavir.Aa01274.1.p|PACid:30249038	Pavir.Aa01274.1.p|PACid:30249038	9225	84483	441	441	38	38	43.5	5.96	251635	1	1	0	592.379	1774.11	3	1774.12	-0.0035	1	39.53	23	27	0.0012	R	KTAEAVDILK	L
1	Pavir.Aa01274.1.p|PACid:30249038	Pavir.Aa01274.1.p|PACid:30249038	9225	84483	441	441	38	38	43.5	5.96	251638	1	1	0	592.379	1774.11	3	1774.12	-0.0031	1	50.56		27	0.00023	R	KTAEAVDILK	L
1	Pavir.Aa01274.1.p|PACid:30249038	Pavir.Aa01274.1.p|PACid:30249038	9225	84483	441	441	38	38	43.5	5.96	251642	1	1	0	888.064	1774.11	2	1774.12	-0.0029	1	37.22		27	0.005	R	KTAEAVDILK	L
1	Pavir.Aa01274.1.p|PACid:30249038	Pavir.Aa01274.1.p|PACid:30249038	9225	84483	441	441	38	38	43.5	5.96	251643	1	1	0	592.379	1774.11	3	1774.12	-0.0026	1	33.64	21	27	0.0032	R	KTAEAVDILK	L
1	Pavir.Aa01274.1.p|PACid:30249038	Pavir.Aa01274.1.p|PACid:30249038	9225	84483	441	441	38	38	43.5	5.96	251644	1	1	0	592.379	1774.11	3	1774.12	-0.0023	1	17.14	14	27	0.025	R	KTAEAVDILK	L
1	Pavir.Aa01274.1.p|PACid:30249038	Pavir.Aa01274.1.p|PACid:30249038	9225	84483	441	441	38	38	43.5	5.96	251645	1	1	0	592.379	1774.12	3	1774.12	-0.0022	1	31.96	24	27	0.0088	R	KTAEAVDILK	L
1	Pavir.Aa01274.1.p|PACid:30249038	Pavir.Aa01274.1.p|PACid:30249038	9225	84483	441	441	38	38	43.5	5.96	251646	1	1	0	592.379	1774.12	3	1774.12	-0.0022	1	29.37	23	27	0.014	R	KTAEAVDILK	L
1	Pavir.Aa01274.1.p|PACid:30249038	Pavir.Aa01274.1.p|PACid:30249038	9225	84483	441	441	38	38	43.5	5.96	251647	1	1	0	888.065	1774.12	2	1774.12	-0.0022	1	52.21		27	0.00016	R	KTAEAVDILK	L
1	Pavir.Aa01274.1.p|PACid:30249038	Pavir.Aa01274.1.p|PACid:30249038	9225	84483	441	441	38	38	43.5	5.96	251649	1	1	0	592.379	1774.12	3	1774.12	-0.0016	1	45.01		27	0.00085	R	KTAEAVDILK	L
1	Pavir.Aa01274.1.p|PACid:30249038	Pavir.Aa01274.1.p|PACid:30249038	9225	84483	441	441	38	38	43.5	5.96	251653	1	1	0	592.379	1774.12	3	1774.12	-0.0014	1	25.86	21	27	0.019	R	KTAEAVDILK	L
1	Pavir.Aa01274.1.p|PACid:30249038	Pavir.Aa01274.1.p|PACid:30249038	9225	84483	441	441	38	38	43.5	5.96	251655	1	1	0	592.379	1774.12	3	1774.12	-0.0011	1	42.18	24	27	0.00082	R	KTAEAVDILK	L
1	Pavir.Aa01274.1.p|PACid:30249038	Pavir.Aa01274.1.p|PACid:30249038	9225	84483	441	441	38	38	43.5	5.96	273705	1	1	0	613.341	1837	3	1837	-0.0034	1	21.62	14	31	0.0094	K	LKSPGEECNK	V
1	Pavir.Aa01274.1.p|PACid:30249038	Pavir.Aa01274.1.p|PACid:30249038	9225	84483	441	441	38	38	43.5	5.96	273707	1	1	0	613.341	1837	3	1837	-0.0032	1	22.57	14	31	0.0076	K	LKSPGEECNK	V
1	Pavir.Aa01274.1.p|PACid:30249038	Pavir.Aa01274.1.p|PACid:30249038	9225	84483	441	441	38	38	43.5	5.96	273708	1	1	0	613.341	1837	3	1837	-0.0027	1	21.77	14	31	0.0091	K	LKSPGEECNK	V
1	Pavir.Aa01274.1.p|PACid:30249038	Pavir.Aa01274.1.p|PACid:30249038	9225	84483	441	441	38	38	43.5	5.96	273710	1	1	0	613.341	1837	3	1837	-0.0025	1	20.51	14	31	0.012	K	LKSPGEECNK	V
1	Pavir.Aa01274.1.p|PACid:30249038	Pavir.Aa01274.1.p|PACid:30249038	9225	84483	441	441	38	38	43.5	5.96	278780	1	1	0	927.025	1852.04	2	1852.04	-0.0046	0	32.11	25	30	0.011	R	TSPQWLGPQIEVIR	A
1	Pavir.Aa01274.1.p|PACid:30249038	Pavir.Aa01274.1.p|PACid:30249038	9225	84483	441	441	38	38	43.5	5.96	278781	1	1	0	618.353	1852.04	3	1852.04	-0.0043	0	32	15	30	0.001	R	TSPQWLGPQIEVIR	A
1	Pavir.Aa01274.1.p|PACid:30249038	Pavir.Aa01274.1.p|PACid:30249038	9225	84483	441	441	38	38	43.5	5.96	278783	1	1	0	927.026	1852.04	2	1852.04	-0.0039	0	70.75		30	5.2e-06	R	TSPQWLGPQIEVIR	A
1	Pavir.Aa01274.1.p|PACid:30249038	Pavir.Aa01274.1.p|PACid:30249038	9225	84483	441	441	38	38	43.5	5.96	278786	1	1	0	927.026	1852.04	2	1852.04	-0.0038	0	55.24	20	30	1.8e-05	R	TSPQWLGPQIEVIR	A
1	Pavir.Aa01274.1.p|PACid:30249038	Pavir.Aa01274.1.p|PACid:30249038	9225	84483	441	441	38	38	43.5	5.96	278788	1	1	0	618.353	1852.04	3	1852.04	-0.0035	0	34.13	15	30	0.00063	R	TSPQWLGPQIEVIR	A
1	Pavir.Aa01274.1.p|PACid:30249038	Pavir.Aa01274.1.p|PACid:30249038	9225	84483	441	441	38	38	43.5	5.96	278789	1	1	0	927.026	1852.04	2	1852.04	-0.0034	0	23.34	20	30	0.029	R	TSPQWLGPQIEVIR	A
1	Pavir.Aa01274.1.p|PACid:30249038	Pavir.Aa01274.1.p|PACid:30249038	9225	84483	441	441	38	38	43.5	5.96	278791	1	1	0	618.353	1852.04	3	1852.04	-0.0033	0	40.57	15	30	0.00016	R	TSPQWLGPQIEVIR	A
1	Pavir.Aa01274.1.p|PACid:30249038	Pavir.Aa01274.1.p|PACid:30249038	9225	84483	441	441	38	38	43.5	5.96	278795	1	1	0	618.353	1852.04	3	1852.04	-0.003	0	48.59	16	30	2.8e-05	R	TSPQWLGPQIEVIR	A
1	Pavir.Aa01274.1.p|PACid:30249038	Pavir.Aa01274.1.p|PACid:30249038	9225	84483	441	441	38	38	43.5	5.96	278798	1	1	0	618.353	1852.04	3	1852.04	-0.0026	0	31.38	19	30	0.0033	R	TSPQWLGPQIEVIR	A
1	Pavir.Aa01274.1.p|PACid:30249038	Pavir.Aa01274.1.p|PACid:30249038	9225	84483	441	441	38	38	43.5	5.96	278799	1	1	0	927.027	1852.04	2	1852.04	-0.0025	0	62.54	26	30	1.3e-05	R	TSPQWLGPQIEVIR	A
1	Pavir.Aa01274.1.p|PACid:30249038	Pavir.Aa01274.1.p|PACid:30249038	9225	84483	441	441	38	38	43.5	5.96	278801	1	1	0	927.027	1852.04	2	1852.04	-0.0024	0	57.07	20	30	1.2e-05	R	TSPQWLGPQIEVIR	A
1	Pavir.Aa01274.1.p|PACid:30249038	Pavir.Aa01274.1.p|PACid:30249038	9225	84483	441	441	38	38	43.5	5.96	278802	1	1	0	618.354	1852.04	3	1852.04	-0.0022	0	22.21	14	31	0.0083	R	TSPQWLGPQIEVIR	A
1	Pavir.Aa01274.1.p|PACid:30249038	Pavir.Aa01274.1.p|PACid:30249038	9225	84483	441	441	38	38	43.5	5.96	278804	1	1	0	618.354	1852.04	3	1852.04	-0.0021	0	41.52	15	31	0.00013	R	TSPQWLGPQIEVIR	A
1	Pavir.Aa01274.1.p|PACid:30249038	Pavir.Aa01274.1.p|PACid:30249038	9225	84483	441	441	38	38	43.5	5.96	278806	1	1	0	618.354	1852.04	3	1852.04	-0.0021	0	36.83	15	31	0.00035	R	TSPQWLGPQIEVIR	A
1	Pavir.Aa01274.1.p|PACid:30249038	Pavir.Aa01274.1.p|PACid:30249038	9225	84483	441	441	38	38	43.5	5.96	278807	1	1	0	618.354	1852.04	3	1852.04	-0.0019	0	66.33	17	31	6.8e-07	R	TSPQWLGPQIEVIR	A
1	Pavir.Aa01274.1.p|PACid:30249038	Pavir.Aa01274.1.p|PACid:30249038	9225	84483	441	441	38	38	43.5	5.96	278808	1	1	0	618.354	1852.04	3	1852.04	-0.0019	0	44.05	15	31	7.4e-05	R	TSPQWLGPQIEVIR	A
1	Pavir.Aa01274.1.p|PACid:30249038	Pavir.Aa01274.1.p|PACid:30249038	9225	84483	441	441	38	38	43.5	5.96	278809	1	1	0	618.354	1852.04	3	1852.04	-0.0017	0	51.54	16	31	1.5e-05	R	TSPQWLGPQIEVIR	A
1	Pavir.Aa01274.1.p|PACid:30249038	Pavir.Aa01274.1.p|PACid:30249038	9225	84483	441	441	38	38	43.5	5.96	278812	1	1	0	618.354	1852.04	3	1852.04	-0.0015	0	32.87	16	30	0.0013	R	TSPQWLGPQIEVIR	A
1	Pavir.Aa01274.1.p|PACid:30249038	Pavir.Aa01274.1.p|PACid:30249038	9225	84483	441	441	38	38	43.5	5.96	278816	1	1	0	618.354	1852.04	3	1852.04	-0.001	0	55.94	16	31	5.7e-06	R	TSPQWLGPQIEVIR	A
1	Pavir.Aa01274.1.p|PACid:30249038	Pavir.Aa01274.1.p|PACid:30249038	9225	84483	441	441	38	38	43.5	5.96	278818	1	1	0	927.028	1852.04	2	1852.04	-0.0002	0	30.21	17	31	0.0028	R	TSPQWLGPQIEVIR	A
1	Pavir.Aa01274.1.p|PACid:30249038	Pavir.Aa01274.1.p|PACid:30249038	9225	84483	441	441	38	38	43.5	5.96	278819	1	1	0	618.354	1852.04	3	1852.04	0.0005	0	39.34	15	31	0.0002	R	TSPQWLGPQIEVIR	A
1	Pavir.Aa01274.1.p|PACid:30249038	Pavir.Aa01274.1.p|PACid:30249038	9225	84483	441	441	38	38	43.5	5.96	278822	1	1	0	927.029	1852.04	2	1852.04	0.0016	0	29.43	24	31	0.015	R	TSPQWLGPQIEVIR	A
1	Pavir.Aa01274.1.p|PACid:30249038	Pavir.Aa01274.1.p|PACid:30249038	9225	84483	441	441	38	38	43.5	5.96	278823	1	1	0	618.355	1852.04	3	1852.04	0.0023	0	49.56	21	31	8.6e-05	R	TSPQWLGPQIEVIR	A
1	Pavir.Aa01274.1.p|PACid:30249038	Pavir.Aa01274.1.p|PACid:30249038	9225	84483	441	441	38	38	43.5	5.96	278824	1	1	0	927.029	1852.04	2	1852.04	0.0033	0	23.63	16	31	0.0092	R	TSPQWLGPQIEVIR	A
1	Pavir.Aa01274.1.p|PACid:30249038	Pavir.Aa01274.1.p|PACid:30249038	9225	84483	441	441	38	38	43.5	5.96	279148	1	1	0	618.68	1853.02	3	1853.03	-0.0057	0	27.64	21	31	0.012	R	TSPQWLGPQIEVIR	A	Deamidated (NQ)	0.00000000200000.0
1	Pavir.Aa01274.1.p|PACid:30249038	Pavir.Aa01274.1.p|PACid:30249038	9225	84483	441	441	38	38	43.5	5.96	279158	1	1	0	927.518	1853.02	2	1853.03	-0.0035	0	28.47	21	31	0.011	R	TSPQWLGPQIEVIR	A	Deamidated (NQ)	0.00000000200000.0
1	Pavir.Aa01274.1.p|PACid:30249038	Pavir.Aa01274.1.p|PACid:30249038	9225	84483	441	441	38	38	43.5	5.96	279168	1	1	0	618.682	1853.02	3	1853.03	-0.0022	0	44.55	18	31	0.00013	R	TSPQWLGPQIEVIR	A	Deamidated (NQ)	0.00020000000000.0
1	Pavir.Aa01274.1.p|PACid:30249038	Pavir.Aa01274.1.p|PACid:30249038	9225	84483	441	441	38	38	43.5	5.96	279176	1	1	0	927.519	1853.02	2	1853.03	-0.0015	0	71.42	27	31	1.9e-06	R	TSPQWLGPQIEVIR	A	Deamidated (NQ)	0.00020000000000.0
1	Pavir.Aa01274.1.p|PACid:30249038	Pavir.Aa01274.1.p|PACid:30249038	9225	84483	441	441	38	38	43.5	5.96	279192	1	1	0	927.528	1853.04	2	1853.03	0.0159	0	19.34	14	31	0.015	R	TSPQWLGPQIEVIR	A	Deamidated (NQ)	0.00020000000000.0
1	Pavir.Aa01274.1.p|PACid:30249038	Pavir.Aa01274.1.p|PACid:30249038	9225	84483	441	441	38	38	43.5	5.96	283308	1	1	1	622.695	1865.06	3	1865.07	-0.0034	1	30.69	16	30	0.0019	R	FSEKDLITAIDR	E
1	Pavir.Aa01274.1.p|PACid:30249038	Pavir.Aa01274.1.p|PACid:30249038	9225	84483	441	441	38	38	43.5	5.96	283313	1	1	1	622.695	1865.06	3	1865.07	-0.0032	1	30.84	15	30	0.0015	R	FSEKDLITAIDR	E
1	Pavir.Aa01274.1.p|PACid:30249038	Pavir.Aa01274.1.p|PACid:30249038	9225	84483	441	441	38	38	43.5	5.96	283314	1	1	1	622.695	1865.06	3	1865.07	-0.0032	1	17.28	14	30	0.029	R	FSEKDLITAIDR	E
1	Pavir.Aa01274.1.p|PACid:30249038	Pavir.Aa01274.1.p|PACid:30249038	9225	84483	441	441	38	38	43.5	5.96	283316	1	1	1	933.539	1865.06	2	1865.07	-0.0031	1	23.03	17	30	0.014	R	FSEKDLITAIDR	E
1	Pavir.Aa01274.1.p|PACid:30249038	Pavir.Aa01274.1.p|PACid:30249038	9225	84483	441	441	38	38	43.5	5.96	283318	1	1	1	622.695	1865.06	3	1865.07	-0.003	1	28.68	18	30	0.0051	R	FSEKDLITAIDR	E
1	Pavir.Aa01274.1.p|PACid:30249038	Pavir.Aa01274.1.p|PACid:30249038	9225	84483	441	441	38	38	43.5	5.96	283321	1	1	1	622.695	1865.06	3	1865.07	-0.0028	1	30.15	15	30	0.0019	R	FSEKDLITAIDR	E
1	Pavir.Aa01274.1.p|PACid:30249038	Pavir.Aa01274.1.p|PACid:30249038	9225	84483	441	441	38	38	43.5	5.96	283322	1	1	1	933.539	1865.06	2	1865.07	-0.0028	1	25.84	14	30	0.0038	R	FSEKDLITAIDR	E
1	Pavir.Aa01274.1.p|PACid:30249038	Pavir.Aa01274.1.p|PACid:30249038	9225	84483	441	441	38	38	43.5	5.96	283327	1	1	1	622.695	1865.06	3	1865.07	-0.0026	1	15.23	13	30	0.037	R	FSEKDLITAIDR	E
1	Pavir.Aa01274.1.p|PACid:30249038	Pavir.Aa01274.1.p|PACid:30249038	9225	84483	441	441	38	38	43.5	5.96	283331	1	1	1	622.695	1865.06	3	1865.07	-0.0021	1	30.15	15	30	0.0019	R	FSEKDLITAIDR	E
1	Pavir.Aa01274.1.p|PACid:30249038	Pavir.Aa01274.1.p|PACid:30249038	9225	84483	441	441	38	38	43.5	5.96	283334	1	1	1	622.695	1865.06	3	1865.07	-0.0019	1	26.82	18	30	0.0073	R	FSEKDLITAIDR	E
1	Pavir.Aa01274.1.p|PACid:30249038	Pavir.Aa01274.1.p|PACid:30249038	9225	84483	441	441	38	38	43.5	5.96	283339	1	1	1	622.696	1865.06	3	1865.07	-0.0017	1	26.13	15	30	0.004	R	FSEKDLITAIDR	E
1	Pavir.Aa01274.1.p|PACid:30249038	Pavir.Aa01274.1.p|PACid:30249038	9225	84483	441	441	38	38	43.5	5.96	283340	1	1	1	622.696	1865.06	3	1865.07	-0.0017	1	23.82	15	30	0.0071	R	FSEKDLITAIDR	E
1	Pavir.Aa01274.1.p|PACid:30249038	Pavir.Aa01274.1.p|PACid:30249038	9225	84483	441	441	38	38	43.5	5.96	283342	1	1	1	622.696	1865.06	3	1865.07	-0.0015	1	25.18	16	30	0.007	R	FSEKDLITAIDR	E
1	Pavir.Aa01274.1.p|PACid:30249038	Pavir.Aa01274.1.p|PACid:30249038	9225	84483	441	441	38	38	43.5	5.96	283351	1	1	1	622.696	1865.07	3	1865.07	0.001	1	25.4	14	30	0.0044	R	FSEKDLITAIDR	E
1	Pavir.Aa01274.1.p|PACid:30249038	Pavir.Aa01274.1.p|PACid:30249038	9225	84483	441	441	38	38	43.5	5.96	283355	1	1	1	622.697	1865.07	3	1865.07	0.004	1	24.31	15	30	0.0059	R	FSEKDLITAIDR	E
1	Pavir.Aa01274.1.p|PACid:30249038	Pavir.Aa01274.1.p|PACid:30249038	9225	84483	441	441	38	38	43.5	5.96	294567	1	1	0	633.386	1897.13	3	1897.14	-0.0054	1	15.23	15	27	0.048	R	TKDGPALQVELLR	H
1	Pavir.Aa01274.1.p|PACid:30249038	Pavir.Aa01274.1.p|PACid:30249038	9225	84483	441	441	38	38	43.5	5.96	294574	1	1	0	949.575	1897.14	2	1897.14	-0.0048	1	17.9	14	27	0.021	R	TKDGPALQVELLR	H
1	Pavir.Aa01274.1.p|PACid:30249038	Pavir.Aa01274.1.p|PACid:30249038	9225	84483	441	441	38	38	43.5	5.96	294575	1	1	0	633.386	1897.14	3	1897.14	-0.0047	1	32.06	15	27	0.00098	R	TKDGPALQVELLR	H
1	Pavir.Aa01274.1.p|PACid:30249038	Pavir.Aa01274.1.p|PACid:30249038	9225	84483	441	441	38	38	43.5	5.96	294577	1	1	0	633.386	1897.14	3	1897.14	-0.0043	1	21.79	14	27	0.009	R	TKDGPALQVELLR	H
1	Pavir.Aa01274.1.p|PACid:30249038	Pavir.Aa01274.1.p|PACid:30249038	9225	84483	441	441	38	38	43.5	5.96	294578	1	1	0	949.575	1897.14	2	1897.14	-0.0043	1	23.84	14	27	0.0062	R	TKDGPALQVELLR	H
1	Pavir.Aa01274.1.p|PACid:30249038	Pavir.Aa01274.1.p|PACid:30249038	9225	84483	441	441	38	38	43.5	5.96	294582	1	1	0	633.386	1897.14	3	1897.14	-0.0039	1	20.79	18	27	0.028	R	TKDGPALQVELLR	H
1	Pavir.Aa01274.1.p|PACid:30249038	Pavir.Aa01274.1.p|PACid:30249038	9225	84483	441	441	38	38	43.5	5.96	294584	1	1	0	633.386	1897.14	3	1897.14	-0.0039	1	21.05	14	27	0.011	R	TKDGPALQVELLR	H
1	Pavir.Aa01274.1.p|PACid:30249038	Pavir.Aa01274.1.p|PACid:30249038	9225	84483	441	441	38	38	43.5	5.96	294595	1	1	0	633.386	1897.14	3	1897.14	-0.0034	1	33.65	15	27	0.0007	R	TKDGPALQVELLR	H
1	Pavir.Aa01274.1.p|PACid:30249038	Pavir.Aa01274.1.p|PACid:30249038	9225	84483	441	441	38	38	43.5	5.96	294596	1	1	0	633.386	1897.14	3	1897.14	-0.0032	1	17.78	17	27	0.047	R	TKDGPALQVELLR	H
1	Pavir.Aa01274.1.p|PACid:30249038	Pavir.Aa01274.1.p|PACid:30249038	9225	84483	441	441	38	38	43.5	5.96	294597	1	1	0	633.386	1897.14	3	1897.14	-0.0032	1	30.9	15	27	0.0014	R	TKDGPALQVELLR	H
1	Pavir.Aa01274.1.p|PACid:30249038	Pavir.Aa01274.1.p|PACid:30249038	9225	84483	441	441	38	38	43.5	5.96	294599	1	1	0	475.292	1897.14	4	1897.14	-0.0031	1	41.18	19	27	0.00038	R	TKDGPALQVELLR	H
1	Pavir.Aa01274.1.p|PACid:30249038	Pavir.Aa01274.1.p|PACid:30249038	9225	84483	441	441	38	38	43.5	5.96	294602	1	1	0	633.386	1897.14	3	1897.14	-0.003	1	25.5	14	27	0.0041	R	TKDGPALQVELLR	H
1	Pavir.Aa01274.1.p|PACid:30249038	Pavir.Aa01274.1.p|PACid:30249038	9225	84483	441	441	38	38	43.5	5.96	294603	1	1	0	633.386	1897.14	3	1897.14	-0.003	1	42.25	18	27	0.00023	R	TKDGPALQVELLR	H
1	Pavir.Aa01274.1.p|PACid:30249038	Pavir.Aa01274.1.p|PACid:30249038	9225	84483	441	441	38	38	43.5	5.96	294605	1	1	0	633.386	1897.14	3	1897.14	-0.0028	1	18.59	14	27	0.018	R	TKDGPALQVELLR	H
1	Pavir.Aa01274.1.p|PACid:30249038	Pavir.Aa01274.1.p|PACid:30249038	9225	84483	441	441	38	38	43.5	5.96	294611	1	1	0	633.386	1897.14	3	1897.14	-0.0024	1	27.26	14	27	0.0028	R	TKDGPALQVELLR	H
1	Pavir.Aa01274.1.p|PACid:30249038	Pavir.Aa01274.1.p|PACid:30249038	9225	84483	441	441	38	38	43.5	5.96	294612	1	1	0	633.386	1897.14	3	1897.14	-0.0024	1	46.36	16	27	5e-05	R	TKDGPALQVELLR	H
1	Pavir.Aa01274.1.p|PACid:30249038	Pavir.Aa01274.1.p|PACid:30249038	9225	84483	441	441	38	38	43.5	5.96	294617	1	1	0	949.576	1897.14	2	1897.14	-0.0022	1	36.45	17	27	0.00064	R	TKDGPALQVELLR	H
1	Pavir.Aa01274.1.p|PACid:30249038	Pavir.Aa01274.1.p|PACid:30249038	9225	84483	441	441	38	38	43.5	5.96	294622	1	1	0	633.387	1897.14	3	1897.14	-0.0017	1	46.61	15	27	4.3e-05	R	TKDGPALQVELLR	H
1	Pavir.Aa01274.1.p|PACid:30249038	Pavir.Aa01274.1.p|PACid:30249038	9225	84483	441	441	38	38	43.5	5.96	294623	1	1	0	633.387	1897.14	3	1897.14	-0.0017	1	22.11	14	27	0.0084	R	TKDGPALQVELLR	H
1	Pavir.Aa01274.1.p|PACid:30249038	Pavir.Aa01274.1.p|PACid:30249038	9225	84483	441	441	38	38	43.5	5.96	294624	1	1	0	633.387	1897.14	3	1897.14	-0.0017	1	30.49	14	27	0.0014	R	TKDGPALQVELLR	H
1	Pavir.Aa01274.1.p|PACid:30249038	Pavir.Aa01274.1.p|PACid:30249038	9225	84483	441	441	38	38	43.5	5.96	294625	1	1	0	633.387	1897.14	3	1897.14	-0.0015	1	43.48	18	27	0.00015	R	TKDGPALQVELLR	H
1	Pavir.Aa01274.1.p|PACid:30249038	Pavir.Aa01274.1.p|PACid:30249038	9225	84483	441	441	38	38	43.5	5.96	294626	1	1	0	633.387	1897.14	3	1897.14	-0.0012	1	44.12	15	27	7.6e-05	R	TKDGPALQVELLR	H
1	Pavir.Aa01274.1.p|PACid:30249038	Pavir.Aa01274.1.p|PACid:30249038	9225	84483	441	441	38	38	43.5	5.96	294814	1	1	0	633.714	1898.12	3	1898.12	-0.0032	1	24.79	14	29	0.0047	R	TKDGPALQVELLR	H	Deamidated (NQ)	0.0000000200000.0
1	Pavir.Aa01274.1.p|PACid:30249038	Pavir.Aa01274.1.p|PACid:30249038	9225	84483	441	441	38	38	43.5	5.96	294815	1	1	0	633.715	1898.12	3	1898.12	-0.001	1	17.64	14	29	0.022	R	TKDGPALQVELLR	H	Deamidated (NQ)	0.0000000200000.0
1	Pavir.Aa01274.1.p|PACid:30249038	Pavir.Aa01274.1.p|PACid:30249038	9225	84483	441	441	38	38	43.5	5.96	306478	1	1	0	968.505	1935	2	1935	-0.0049	0	113.4	27	30	1.2e-10	R	EVNSVNDNPVIDVHR	G
1	Pavir.Aa01274.1.p|PACid:30249038	Pavir.Aa01274.1.p|PACid:30249038	9225	84483	441	441	38	38	43.5	5.96	306480	1	1	0	646.006	1935	3	1935	-0.0044	0	52.2	16	30	1.3e-05	R	EVNSVNDNPVIDVHR	G
1	Pavir.Aa01274.1.p|PACid:30249038	Pavir.Aa01274.1.p|PACid:30249038	9225	84483	441	441	38	38	43.5	5.96	306481	1	1	0	646.006	1935	3	1935	-0.0041	0	40.11	15	30	0.00017	R	EVNSVNDNPVIDVHR	G
1	Pavir.Aa01274.1.p|PACid:30249038	Pavir.Aa01274.1.p|PACid:30249038	9225	84483	441	441	38	38	43.5	5.96	306482	1	1	0	646.006	1935	3	1935	-0.0041	0	50.31	16	30	1.9e-05	R	EVNSVNDNPVIDVHR	G
1	Pavir.Aa01274.1.p|PACid:30249038	Pavir.Aa01274.1.p|PACid:30249038	9225	84483	441	441	38	38	43.5	5.96	306485	1	1	0	646.006	1935	3	1935	-0.0039	0	60.22	16	30	2.3e-06	R	EVNSVNDNPVIDVHR	G
1	Pavir.Aa01274.1.p|PACid:30249038	Pavir.Aa01274.1.p|PACid:30249038	9225	84483	441	441	38	38	43.5	5.96	306486	1	1	0	646.006	1935	3	1935	-0.0039	0	39.47	15	30	0.0002	R	EVNSVNDNPVIDVHR	G
1	Pavir.Aa01274.1.p|PACid:30249038	Pavir.Aa01274.1.p|PACid:30249038	9225	84483	441	441	38	38	43.5	5.96	306487	1	1	0	646.006	1935	3	1935	-0.0037	0	74.15	17	30	1.2e-07	R	EVNSVNDNPVIDVHR	G
1	Pavir.Aa01274.1.p|PACid:30249038	Pavir.Aa01274.1.p|PACid:30249038	9225	84483	441	441	38	38	43.5	5.96	306488	1	1	0	646.006	1935	3	1935	-0.0037	0	69.22	17	30	3.2e-07	R	EVNSVNDNPVIDVHR	G
1	Pavir.Aa01274.1.p|PACid:30249038	Pavir.Aa01274.1.p|PACid:30249038	9225	84483	441	441	38	38	43.5	5.96	306489	1	1	0	968.506	1935	2	1935	-0.0036	0	91.35	24	30	1.1e-08	R	EVNSVNDNPVIDVHR	G
1	Pavir.Aa01274.1.p|PACid:30249038	Pavir.Aa01274.1.p|PACid:30249038	9225	84483	441	441	38	38	43.5	5.96	306491	1	1	0	646.006	1935	3	1935	-0.0035	0	57.69	16	30	4e-06	R	EVNSVNDNPVIDVHR	G
1	Pavir.Aa01274.1.p|PACid:30249038	Pavir.Aa01274.1.p|PACid:30249038	9225	84483	441	441	38	38	43.5	5.96	306492	1	1	0	646.006	1935	3	1935	-0.0035	0	44.89	15	30	6.2e-05	R	EVNSVNDNPVIDVHR	G
1	Pavir.Aa01274.1.p|PACid:30249038	Pavir.Aa01274.1.p|PACid:30249038	9225	84483	441	441	38	38	43.5	5.96	306493	1	1	0	646.007	1935	3	1935	-0.0034	0	44.92	15	30	6.1e-05	R	EVNSVNDNPVIDVHR	G
1	Pavir.Aa01274.1.p|PACid:30249038	Pavir.Aa01274.1.p|PACid:30249038	9225	84483	441	441	38	38	43.5	5.96	306494	1	1	0	646.007	1935	3	1935	-0.0034	0	31.7	14	30	0.0011	R	EVNSVNDNPVIDVHR	G
1	Pavir.Aa01274.1.p|PACid:30249038	Pavir.Aa01274.1.p|PACid:30249038	9225	84483	441	441	38	38	43.5	5.96	306495	1	1	0	646.007	1935	3	1935	-0.0034	0	48.58	17	30	3.6e-05	R	EVNSVNDNPVIDVHR	G
1	Pavir.Aa01274.1.p|PACid:30249038	Pavir.Aa01274.1.p|PACid:30249038	9225	84483	441	441	38	38	43.5	5.96	306496	1	1	0	646.007	1935	3	1935	-0.0034	0	66.66	20	30	1.2e-06	R	EVNSVNDNPVIDVHR	G
1	Pavir.Aa01274.1.p|PACid:30249038	Pavir.Aa01274.1.p|PACid:30249038	9225	84483	441	441	38	38	43.5	5.96	306498	1	1	0	646.007	1935	3	1935	-0.0032	0	32.15	15	30	0.00097	R	EVNSVNDNPVIDVHR	G
1	Pavir.Aa01274.1.p|PACid:30249038	Pavir.Aa01274.1.p|PACid:30249038	9225	84483	441	441	38	38	43.5	5.96	306499	1	1	0	646.007	1935	3	1935	-0.0032	0	57.5	16	30	4.1e-06	R	EVNSVNDNPVIDVHR	G
1	Pavir.Aa01274.1.p|PACid:30249038	Pavir.Aa01274.1.p|PACid:30249038	9225	84483	441	441	38	38	43.5	5.96	306501	1	1	0	646.007	1935	3	1935	-0.003	0	28.73	16	30	0.0031	R	EVNSVNDNPVIDVHR	G
1	Pavir.Aa01274.1.p|PACid:30249038	Pavir.Aa01274.1.p|PACid:30249038	9225	84483	441	441	38	38	43.5	5.96	306502	1	1	0	646.007	1935	3	1935	-0.003	0	71.37	21	30	5.1e-07	R	EVNSVNDNPVIDVHR	G
1	Pavir.Aa01274.1.p|PACid:30249038	Pavir.Aa01274.1.p|PACid:30249038	9225	84483	441	441	38	38	43.5	5.96	306503	1	1	0	646.007	1935	3	1935	-0.003	0	25.91	14	30	0.0037	R	EVNSVNDNPVIDVHR	G
1	Pavir.Aa01274.1.p|PACid:30249038	Pavir.Aa01274.1.p|PACid:30249038	9225	84483	441	441	38	38	43.5	5.96	306506	1	1	0	646.007	1935	3	1935	-0.0028	0	56.7	19	30	1e-05	R	EVNSVNDNPVIDVHR	G
1	Pavir.Aa01274.1.p|PACid:30249038	Pavir.Aa01274.1.p|PACid:30249038	9225	84483	441	441	38	38	43.5	5.96	306507	1	1	0	646.007	1935	3	1935	-0.0028	0	48.44	17	30	3.8e-05	R	EVNSVNDNPVIDVHR	G
1	Pavir.Aa01274.1.p|PACid:30249038	Pavir.Aa01274.1.p|PACid:30249038	9225	84483	441	441	38	38	43.5	5.96	306508	1	1	0	646.007	1935	3	1935	-0.0028	0	42.76	15	30	9.8e-05	R	EVNSVNDNPVIDVHR	G
1	Pavir.Aa01274.1.p|PACid:30249038	Pavir.Aa01274.1.p|PACid:30249038	9225	84483	441	441	38	38	43.5	5.96	306510	1	1	0	646.007	1935	3	1935	-0.0026	0	46.73	19	30	8.7e-05	R	EVNSVNDNPVIDVHR	G
1	Pavir.Aa01274.1.p|PACid:30249038	Pavir.Aa01274.1.p|PACid:30249038	9225	84483	441	441	38	38	43.5	5.96	306511	1	1	0	646.007	1935	3	1935	-0.0026	0	55.71	19	30	1.1e-05	R	EVNSVNDNPVIDVHR	G
1	Pavir.Aa01274.1.p|PACid:30249038	Pavir.Aa01274.1.p|PACid:30249038	9225	84483	441	441	38	38	43.5	5.96	306513	1	1	0	968.507	1935	2	1935	-0.0024	0	61.77	18	30	2.2e-06	R	EVNSVNDNPVIDVHR	G
1	Pavir.Aa01274.1.p|PACid:30249038	Pavir.Aa01274.1.p|PACid:30249038	9225	84483	441	441	38	38	43.5	5.96	306514	1	1	0	646.007	1935	3	1935	-0.0024	0	45.54	17	30	7e-05	R	EVNSVNDNPVIDVHR	G
1	Pavir.Aa01274.1.p|PACid:30249038	Pavir.Aa01274.1.p|PACid:30249038	9225	84483	441	441	38	38	43.5	5.96	306516	1	1	0	646.007	1935	3	1935	-0.0022	0	28.02	14	30	0.0024	R	EVNSVNDNPVIDVHR	G
1	Pavir.Aa01274.1.p|PACid:30249038	Pavir.Aa01274.1.p|PACid:30249038	9225	84483	441	441	38	38	43.5	5.96	306517	1	1	0	646.007	1935	3	1935	-0.0021	0	55.88	16	30	6.3e-06	R	EVNSVNDNPVIDVHR	G
1	Pavir.Aa01274.1.p|PACid:30249038	Pavir.Aa01274.1.p|PACid:30249038	9225	84483	441	441	38	38	43.5	5.96	306518	1	1	0	968.507	1935	2	1935	-0.002	0	24.85	14	30	0.0047	R	EVNSVNDNPVIDVHR	G
1	Pavir.Aa01274.1.p|PACid:30249038	Pavir.Aa01274.1.p|PACid:30249038	9225	84483	441	441	38	38	43.5	5.96	306519	1	1	0	646.007	1935	3	1935	-0.0019	0	42.71	20	30	0.00031	R	EVNSVNDNPVIDVHR	G
1	Pavir.Aa01274.1.p|PACid:30249038	Pavir.Aa01274.1.p|PACid:30249038	9225	84483	441	441	38	38	43.5	5.96	306520	1	1	0	646.007	1935	3	1935	-0.0019	0	58.14	21	30	9.9e-06	R	EVNSVNDNPVIDVHR	G
1	Pavir.Aa01274.1.p|PACid:30249038	Pavir.Aa01274.1.p|PACid:30249038	9225	84483	441	441	38	38	43.5	5.96	306521	1	1	0	646.007	1935	3	1935	-0.0019	0	68.98	17	30	3.4e-07	R	EVNSVNDNPVIDVHR	G
1	Pavir.Aa01274.1.p|PACid:30249038	Pavir.Aa01274.1.p|PACid:30249038	9225	84483	441	441	38	38	43.5	5.96	306522	1	1	0	646.007	1935	3	1935	-0.0017	0	45.4	16	30	7.2e-05	R	EVNSVNDNPVIDVHR	G
1	Pavir.Aa01274.1.p|PACid:30249038	Pavir.Aa01274.1.p|PACid:30249038	9225	84483	441	441	38	38	43.5	5.96	306523	1	1	0	646.007	1935	3	1935	-0.0017	0	63.14	20	30	2.7e-06	R	EVNSVNDNPVIDVHR	G
1	Pavir.Aa01274.1.p|PACid:30249038	Pavir.Aa01274.1.p|PACid:30249038	9225	84483	441	441	38	38	43.5	5.96	306526	1	1	0	968.507	1935	2	1935	-0.0014	0	74.84	22	30	2.6e-07	R	EVNSVNDNPVIDVHR	G
1	Pavir.Aa01274.1.p|PACid:30249038	Pavir.Aa01274.1.p|PACid:30249038	9225	84483	441	441	38	38	43.5	5.96	306533	1	1	0	646.007	1935	3	1935	-0.0008	0	22.78	14	30	0.0073	R	EVNSVNDNPVIDVHR	G
1	Pavir.Aa01274.1.p|PACid:30249038	Pavir.Aa01274.1.p|PACid:30249038	9225	84483	441	441	38	38	43.5	5.96	306537	1	1	0	484.757	1935	4	1935	-0.0005	0	39.69	20	30	0.00061	R	EVNSVNDNPVIDVHR	G
1	Pavir.Aa01274.1.p|PACid:30249038	Pavir.Aa01274.1.p|PACid:30249038	9225	84483	441	441	38	38	43.5	5.96	306542	1	1	0	646.008	1935	3	1935	0.0005	0	66.05	20	30	1.4e-06	R	EVNSVNDNPVIDVHR	G
1	Pavir.Aa01274.1.p|PACid:30249038	Pavir.Aa01274.1.p|PACid:30249038	9225	84483	441	441	38	38	43.5	5.96	306544	1	1	0	646.008	1935	3	1935	0.0009	0	28.11	19	30	0.007	R	EVNSVNDNPVIDVHR	G
1	Pavir.Aa01274.1.p|PACid:30249038	Pavir.Aa01274.1.p|PACid:30249038	9225	84483	441	441	38	38	43.5	5.96	306820	1	1	0	968.997	1935.98	2	1935.99	-0.0054	0	67.27	22	29	1.8e-06	R	EVNSVNDNPVIDVHR	G	Deamidated (NQ)	0.000002000000000.0
1	Pavir.Aa01274.1.p|PACid:30249038	Pavir.Aa01274.1.p|PACid:30249038	9225	84483	441	441	38	38	43.5	5.96	306821	1	1	0	968.997	1935.98	2	1935.99	-0.0052	0	45.55	25	29	0.0005	R	EVNSVNDNPVIDVHR	G	Deamidated (NQ)	0.002000000000000.0
1	Pavir.Aa01274.1.p|PACid:30249038	Pavir.Aa01274.1.p|PACid:30249038	9225	84483	441	441	38	38	43.5	5.96	306824	1	1	0	646.334	1935.98	3	1935.99	-0.0048	0	65	18	29	1.2e-06	R	EVNSVNDNPVIDVHR	G	Deamidated (NQ)	0.002000000000000.0
1	Pavir.Aa01274.1.p|PACid:30249038	Pavir.Aa01274.1.p|PACid:30249038	9225	84483	441	441	38	38	43.5	5.96	306825	1	1	0	646.334	1935.98	3	1935.99	-0.0039	0	50.16	23	29	9.7e-05	R	EVNSVNDNPVIDVHR	G	Deamidated (NQ)	0.002000000000000.0
1	Pavir.Aa01274.1.p|PACid:30249038	Pavir.Aa01274.1.p|PACid:30249038	9225	84483	441	441	38	38	43.5	5.96	306826	1	1	0	646.335	1935.98	3	1935.99	-0.0035	0	49.61	16	29	2.2e-05	R	EVNSVNDNPVIDVHR	G	Deamidated (NQ)	0.000002000000000.0
1	Pavir.Aa01274.1.p|PACid:30249038	Pavir.Aa01274.1.p|PACid:30249038	9225	84483	441	441	38	38	43.5	5.96	306827	1	1	0	646.335	1935.98	3	1935.99	-0.0035	0	64.07	17	29	9.8e-07	R	EVNSVNDNPVIDVHR	G	Deamidated (NQ)	0.000002000000000.0
1	Pavir.Aa01274.1.p|PACid:30249038	Pavir.Aa01274.1.p|PACid:30249038	9225	84483	441	441	38	38	43.5	5.96	306830	1	1	0	646.335	1935.98	3	1935.99	-0.0028	0	80.23	26	29	2.3e-07	R	EVNSVNDNPVIDVHR	G	Deamidated (NQ)	0.002000000000000.0
1	Pavir.Aa01274.1.p|PACid:30249038	Pavir.Aa01274.1.p|PACid:30249038	9225	84483	441	441	38	38	43.5	5.96	306831	1	1	0	646.335	1935.98	3	1935.99	-0.0026	0	52.68	18	29	1.8e-05	R	EVNSVNDNPVIDVHR	G	Deamidated (NQ)	0.000002000000000.0
1	Pavir.Aa01274.1.p|PACid:30249038	Pavir.Aa01274.1.p|PACid:30249038	9225	84483	441	441	38	38	43.5	5.96	306832	1	1	0	646.335	1935.98	3	1935.99	-0.0024	0	79.39	17	29	3.6e-08	R	EVNSVNDNPVIDVHR	G	Deamidated (NQ)	0.002000000000000.0
1	Pavir.Aa01274.1.p|PACid:30249038	Pavir.Aa01274.1.p|PACid:30249038	9225	84483	441	441	38	38	43.5	5.96	306833	1	1	0	968.999	1935.98	2	1935.99	-0.0021	0	121.63	29	29	3.2e-11	R	EVNSVNDNPVIDVHR	G	Deamidated (NQ)	0.000002000000000.0
1	Pavir.Aa01274.1.p|PACid:30249038	Pavir.Aa01274.1.p|PACid:30249038	9225	84483	441	441	38	38	43.5	5.96	306834	1	1	0	968.999	1935.98	2	1935.99	-0.0021	0	111.57	26	29	1.7e-10	R	EVNSVNDNPVIDVHR	G	Deamidated (NQ)	0.002000000000000.0
1	Pavir.Aa01274.1.p|PACid:30249038	Pavir.Aa01274.1.p|PACid:30249038	9225	84483	441	441	38	38	43.5	5.96	306835	1	1	0	646.335	1935.98	3	1935.99	-0.0017	0	69.63	17	29	3.3e-07	R	EVNSVNDNPVIDVHR	G	Deamidated (NQ)	0.002000000000000.0
1	Pavir.Aa01274.1.p|PACid:30249038	Pavir.Aa01274.1.p|PACid:30249038	9225	84483	441	441	38	38	43.5	5.96	306836	1	1	0	646.335	1935.98	3	1935.99	-0.0011	0	44.76	15	29	6.3e-05	R	EVNSVNDNPVIDVHR	G	Deamidated (NQ)	0.002000000000000.0
1	Pavir.Aa01274.1.p|PACid:30249038	Pavir.Aa01274.1.p|PACid:30249038	9225	84483	441	441	38	38	43.5	5.96	306838	1	1	0	646.336	1935.99	3	1935.99	0.0016	0	64.56	19	30	1.4e-06	R	EVNSVNDNPVIDVHR	G	Deamidated (NQ)	0.000002000000000.0
1	Pavir.Aa01274.1.p|PACid:30249038	Pavir.Aa01274.1.p|PACid:30249038	9225	84483	441	441	38	38	43.5	5.96	306839	1	1	0	646.336	1935.99	3	1935.99	0.0022	0	50.24	18	30	3.2e-05	R	EVNSVNDNPVIDVHR	G	Deamidated (NQ)	0.000002000000000.0
1	Pavir.Aa01274.1.p|PACid:30249038	Pavir.Aa01274.1.p|PACid:30249038	9225	84483	441	441	38	38	43.5	5.96	306842	1	1	0	646.337	1935.99	3	1935.99	0.004	0	56.09	19	30	9.9e-06	R	EVNSVNDNPVIDVHR	G	Deamidated (NQ)	0.000002000000000.0
1	Pavir.Aa01274.1.p|PACid:30249038	Pavir.Aa01274.1.p|PACid:30249038	9225	84483	441	441	38	38	43.5	5.96	307119	1	1	0	646.663	1936.97	3	1936.97	-0.0026	0	54.91	16	29	7.1e-06	R	EVNSVNDNPVIDVHR	G	2 Deamidated (NQ)	0.002002000000000.0
1	Pavir.Aa01274.1.p|PACid:30249038	Pavir.Aa01274.1.p|PACid:30249038	9225	84483	441	441	38	38	43.5	5.96	307121	1	1	0	646.663	1936.97	3	1936.97	-0.0021	0	52.07	16	29	1.3e-05	R	EVNSVNDNPVIDVHR	G	2 Deamidated (NQ)	0.002002000000000.0
1	Pavir.Aa01274.1.p|PACid:30249038	Pavir.Aa01274.1.p|PACid:30249038	9225	84483	441	441	38	38	43.5	5.96	307122	1	1	0	646.663	1936.97	3	1936.97	-0.0008	0	64	16	29	1e-06	R	EVNSVNDNPVIDVHR	G	2 Deamidated (NQ)	0.002002000000000.0
1	Pavir.Aa01274.1.p|PACid:30249038	Pavir.Aa01274.1.p|PACid:30249038	9225	84483	441	441	38	38	43.5	5.96	307143	1	1	0	969.499	1936.98	2	1936.97	0.0142	0	45.85	18	30	9.3e-05	R	EVNSVNDNPVIDVHR	G	2 Deamidated (NQ)	0.000002020000000.0
1	Pavir.Aa01274.1.p|PACid:30249038	Pavir.Aa01274.1.p|PACid:30249038	9225	84483	441	441	38	38	43.5	5.96	307421	1	1	0	646.997	1937.97	3	1937.95	0.0157	0	46.41	19	29	0.0001	R	EVNSVNDNPVIDVHR	G	3 Deamidated (NQ)	0.002002020000000.0
1	Pavir.Aa01274.1.p|PACid:30249038	Pavir.Aa01274.1.p|PACid:30249038	9225	84483	441	441	38	38	43.5	5.96	308694	1	1	1	648.336	1941.99	3	1942	-0.0097	0	43.28	15	29	8.7e-05	R	DASGVAVELDEEARPR	V
1	Pavir.Aa01274.1.p|PACid:30249038	Pavir.Aa01274.1.p|PACid:30249038	9225	84483	441	441	38	38	43.5	5.96	308704	1	1	1	972.002	1941.99	2	1942	-0.007	0	61.72	16	29	1.6e-06	R	DASGVAVELDEEARPR	V
1	Pavir.Aa01274.1.p|PACid:30249038	Pavir.Aa01274.1.p|PACid:30249038	9225	84483	441	441	38	38	43.5	5.96	308713	1	1	1	648.337	1941.99	3	1942	-0.0058	0	46.58	15	29	4.3e-05	R	DASGVAVELDEEARPR	V
1	Pavir.Aa01274.1.p|PACid:30249038	Pavir.Aa01274.1.p|PACid:30249038	9225	84483	441	441	38	38	43.5	5.96	308714	1	1	1	648.337	1941.99	3	1942	-0.0055	0	23.93	16	29	0.0086	R	DASGVAVELDEEARPR	V
1	Pavir.Aa01274.1.p|PACid:30249038	Pavir.Aa01274.1.p|PACid:30249038	9225	84483	441	441	38	38	43.5	5.96	308722	1	1	1	648.338	1941.99	3	1942	-0.0049	0	34.54	15	29	0.0006	R	DASGVAVELDEEARPR	V
1	Pavir.Aa01274.1.p|PACid:30249038	Pavir.Aa01274.1.p|PACid:30249038	9225	84483	441	441	38	38	43.5	5.96	308728	1	1	1	648.338	1941.99	3	1942	-0.0045	0	41.7	15	29	0.00012	R	DASGVAVELDEEARPR	V
1	Pavir.Aa01274.1.p|PACid:30249038	Pavir.Aa01274.1.p|PACid:30249038	9225	84483	441	441	38	38	43.5	5.96	308729	1	1	1	648.338	1941.99	3	1942	-0.0044	0	44.56	15	29	6.6e-05	R	DASGVAVELDEEARPR	V
1	Pavir.Aa01274.1.p|PACid:30249038	Pavir.Aa01274.1.p|PACid:30249038	9225	84483	441	441	38	38	43.5	5.96	308730	1	1	1	648.338	1941.99	3	1942	-0.0044	0	32.76	16	29	0.0011	R	DASGVAVELDEEARPR	V
1	Pavir.Aa01274.1.p|PACid:30249038	Pavir.Aa01274.1.p|PACid:30249038	9225	84483	441	441	38	38	43.5	5.96	308735	1	1	1	648.338	1941.99	3	1942	-0.004	0	21.3	16	29	0.016	R	DASGVAVELDEEARPR	V
1	Pavir.Aa01274.1.p|PACid:30249038	Pavir.Aa01274.1.p|PACid:30249038	9225	84483	441	441	38	38	43.5	5.96	308736	1	1	1	648.338	1941.99	3	1942	-0.004	0	32.74	15	29	0.00085	R	DASGVAVELDEEARPR	V
1	Pavir.Aa01274.1.p|PACid:30249038	Pavir.Aa01274.1.p|PACid:30249038	9225	84483	441	441	38	38	43.5	5.96	308737	1	1	1	648.338	1941.99	3	1942	-0.004	0	27.37	14	29	0.0027	R	DASGVAVELDEEARPR	V
1	Pavir.Aa01274.1.p|PACid:30249038	Pavir.Aa01274.1.p|PACid:30249038	9225	84483	441	441	38	38	43.5	5.96	308745	1	1	1	648.338	1941.99	3	1942	-0.0035	0	46.95	18	29	6.7e-05	R	DASGVAVELDEEARPR	V
1	Pavir.Aa01274.1.p|PACid:30249038	Pavir.Aa01274.1.p|PACid:30249038	9225	84483	441	441	38	38	43.5	5.96	308750	1	1	1	648.338	1941.99	3	1942	-0.0031	0	28.55	14	29	0.0021	R	DASGVAVELDEEARPR	V
1	Pavir.Aa01274.1.p|PACid:30249038	Pavir.Aa01274.1.p|PACid:30249038	9225	84483	441	441	38	38	43.5	5.96	308751	1	1	1	648.338	1941.99	3	1942	-0.0027	0	25.25	15	29	0.0058	R	DASGVAVELDEEARPR	V
1	Pavir.Aa01274.1.p|PACid:30249038	Pavir.Aa01274.1.p|PACid:30249038	9225	84483	441	441	38	38	43.5	5.96	308753	1	1	1	648.338	1941.99	3	1942	-0.0025	0	27.76	14	29	0.0025	R	DASGVAVELDEEARPR	V
1	Pavir.Aa01274.1.p|PACid:30249038	Pavir.Aa01274.1.p|PACid:30249038	9225	84483	441	441	38	38	43.5	5.96	308754	1	1	1	648.338	1941.99	3	1942	-0.0024	0	15.36	13	29	0.036	R	DASGVAVELDEEARPR	V
1	Pavir.Aa01274.1.p|PACid:30249038	Pavir.Aa01274.1.p|PACid:30249038	9225	84483	441	441	38	38	43.5	5.96	308760	1	1	1	648.339	1941.99	3	1942	-0.002	0	16.19	14	29	0.03	R	DASGVAVELDEEARPR	V
1	Pavir.Aa01274.1.p|PACid:30249038	Pavir.Aa01274.1.p|PACid:30249038	9225	84483	441	441	38	38	43.5	5.96	308761	1	1	1	648.339	1941.99	3	1942	-0.002	0	45.8	15	29	5.1e-05	R	DASGVAVELDEEARPR	V
1	Pavir.Aa01274.1.p|PACid:30249038	Pavir.Aa01274.1.p|PACid:30249038	9225	84483	441	441	38	38	43.5	5.96	308762	1	1	1	648.339	1941.99	3	1942	-0.002	0	18.19	14	29	0.02	R	DASGVAVELDEEARPR	V
1	Pavir.Aa01274.1.p|PACid:30249038	Pavir.Aa01274.1.p|PACid:30249038	9225	84483	441	441	38	38	43.5	5.96	308763	1	1	1	648.339	1941.99	3	1942	-0.002	0	71.48	20	29	4.1e-07	R	DASGVAVELDEEARPR	V
1	Pavir.Aa01274.1.p|PACid:30249038	Pavir.Aa01274.1.p|PACid:30249038	9225	84483	441	441	38	38	43.5	5.96	308764	1	1	1	648.339	1941.99	3	1942	-0.0018	0	30.05	14	29	0.0015	R	DASGVAVELDEEARPR	V
1	Pavir.Aa01274.1.p|PACid:30249038	Pavir.Aa01274.1.p|PACid:30249038	9225	84483	441	441	38	38	43.5	5.96	308767	1	1	1	972.005	1941.99	2	1942	-0.0015	0	44.29	15	29	7e-05	R	DASGVAVELDEEARPR	V
1	Pavir.Aa01274.1.p|PACid:30249038	Pavir.Aa01274.1.p|PACid:30249038	9225	84483	441	441	38	38	43.5	5.96	308769	1	1	1	648.339	1941.99	3	1942	-0.0012	0	35.4	15	29	0.00048	R	DASGVAVELDEEARPR	V
1	Pavir.Aa01274.1.p|PACid:30249038	Pavir.Aa01274.1.p|PACid:30249038	9225	84483	441	441	38	38	43.5	5.96	308771	1	1	1	648.339	1941.99	3	1942	-0.0012	0	57.89	20	29	8.7e-06	R	DASGVAVELDEEARPR	V
1	Pavir.Aa01274.1.p|PACid:30249038	Pavir.Aa01274.1.p|PACid:30249038	9225	84483	441	441	38	38	43.5	5.96	308772	1	1	1	648.339	1941.99	3	1942	-0.0012	0	29.9	14	29	0.0016	R	DASGVAVELDEEARPR	V
1	Pavir.Aa01274.1.p|PACid:30249038	Pavir.Aa01274.1.p|PACid:30249038	9225	84483	441	441	38	38	43.5	5.96	308777	1	1	1	972.005	1942	2	1942	-0.0008	0	55.43	20	29	1.6e-05	R	DASGVAVELDEEARPR	V
1	Pavir.Aa01274.1.p|PACid:30249038	Pavir.Aa01274.1.p|PACid:30249038	9225	84483	441	441	38	38	43.5	5.96	308779	1	1	1	648.339	1942	3	1942	-0.0007	0	40.14	15	29	0.00017	R	DASGVAVELDEEARPR	V
1	Pavir.Aa01274.1.p|PACid:30249038	Pavir.Aa01274.1.p|PACid:30249038	9225	84483	441	441	38	38	43.5	5.96	312260	1	1	1	489.063	1952.22	4	1952.23	-0.0054	0	20	14	25	0.013	K	VNELDPLLKPK	Q
1	Pavir.Aa01274.1.p|PACid:30249038	Pavir.Aa01274.1.p|PACid:30249038	9225	84483	441	441	38	38	43.5	5.96	312263	1	1	1	651.748	1952.22	3	1952.23	-0.0052	0	18.87	14	25	0.017	K	VNELDPLLKPK	Q
1	Pavir.Aa01274.1.p|PACid:30249038	Pavir.Aa01274.1.p|PACid:30249038	9225	84483	441	441	38	38	43.5	5.96	312266	1	1	1	489.063	1952.22	4	1952.23	-0.0048	0	18.03	14	25	0.02	K	VNELDPLLKPK	Q
1	Pavir.Aa01274.1.p|PACid:30249038	Pavir.Aa01274.1.p|PACid:30249038	9225	84483	441	441	38	38	43.5	5.96	312270	1	1	1	651.748	1952.22	3	1952.23	-0.0045	0	23.77	15	25	0.0071	K	VNELDPLLKPK	Q
1	Pavir.Aa01274.1.p|PACid:30249038	Pavir.Aa01274.1.p|PACid:30249038	9225	84483	441	441	38	38	43.5	5.96	312272	1	1	1	489.063	1952.22	4	1952.23	-0.004	0	22.09	14	25	0.0085	K	VNELDPLLKPK	Q
1	Pavir.Aa01274.1.p|PACid:30249038	Pavir.Aa01274.1.p|PACid:30249038	9225	84483	441	441	38	38	43.5	5.96	312276	1	1	1	489.063	1952.22	4	1952.23	-0.0038	0	25.4	14	25	0.0041	K	VNELDPLLKPK	Q
1	Pavir.Aa01274.1.p|PACid:30249038	Pavir.Aa01274.1.p|PACid:30249038	9225	84483	441	441	38	38	43.5	5.96	312284	1	1	1	651.749	1952.22	3	1952.23	-0.0033	0	22.75	15	25	0.0085	K	VNELDPLLKPK	Q
1	Pavir.Aa01274.1.p|PACid:30249038	Pavir.Aa01274.1.p|PACid:30249038	9225	84483	441	441	38	38	43.5	5.96	312285	1	1	1	651.749	1952.22	3	1952.23	-0.0033	0	16.11	14	25	0.031	K	VNELDPLLKPK	Q
1	Pavir.Aa01274.1.p|PACid:30249038	Pavir.Aa01274.1.p|PACid:30249038	9225	84483	441	441	38	38	43.5	5.96	312289	1	1	1	651.749	1952.22	3	1952.23	-0.0032	0	14.05	13	25	0.049	K	VNELDPLLKPK	Q
1	Pavir.Aa01274.1.p|PACid:30249038	Pavir.Aa01274.1.p|PACid:30249038	9225	84483	441	441	38	38	43.5	5.96	312290	1	1	1	489.063	1952.22	4	1952.23	-0.0032	0	15.25	13	25	0.037	K	VNELDPLLKPK	Q
1	Pavir.Aa01274.1.p|PACid:30249038	Pavir.Aa01274.1.p|PACid:30249038	9225	84483	441	441	38	38	43.5	5.96	312300	1	1	1	651.749	1952.23	3	1952.23	-0.0026	0	18.26	14	25	0.019	K	VNELDPLLKPK	Q
1	Pavir.Aa01274.1.p|PACid:30249038	Pavir.Aa01274.1.p|PACid:30249038	9225	84483	441	441	38	38	43.5	5.96	312305	1	1	1	489.064	1952.23	4	1952.23	-0.0023	0	20.25	14	25	0.013	K	VNELDPLLKPK	Q
1	Pavir.Aa01274.1.p|PACid:30249038	Pavir.Aa01274.1.p|PACid:30249038	9225	84483	441	441	38	38	43.5	5.96	312307	1	1	1	977.12	1952.23	2	1952.23	-0.0022	0	18.7	14	25	0.018	K	VNELDPLLKPK	Q
1	Pavir.Aa01274.1.p|PACid:30249038	Pavir.Aa01274.1.p|PACid:30249038	9225	84483	441	441	38	38	43.5	5.96	312310	1	1	1	651.75	1952.23	3	1952.23	-0.0012	0	19.53	14	25	0.016	K	VNELDPLLKPK	Q
1	Pavir.Aa01274.1.p|PACid:30249038	Pavir.Aa01274.1.p|PACid:30249038	9225	84483	441	441	38	38	43.5	5.96	312312	1	1	1	651.75	1952.23	3	1952.23	-0.0008	0	24.73	15	25	0.0059	K	VNELDPLLKPK	Q
1	Pavir.Aa01274.1.p|PACid:30249038	Pavir.Aa01274.1.p|PACid:30249038	9225	84483	441	441	38	38	43.5	5.96	312604	1	1	1	977.62	1953.23	2	1953.21	0.0147	0	15.53	13	24	0.035	K	VNELDPLLKPK	Q	Deamidated (NQ)	0.02000000000.0
1	Pavir.Aa01274.1.p|PACid:30249038	Pavir.Aa01274.1.p|PACid:30249038	9225	84483	441	441	38	38	43.5	5.96	316163	1	1	0	655.403	1963.19	3	1963.19	-0.005	1	19.55	14	28	0.015	K	TSVKNTVTQVAK	K	Deamidated (NQ)	0.000020000000.0
1	Pavir.Aa01274.1.p|PACid:30249038	Pavir.Aa01274.1.p|PACid:30249038	9225	84483	441	441	38	38	43.5	5.96	344797	1	1	0	514.316	2053.24	4	2053.24	-0.0048	2	17.52	14	28	0.023	R	RTKDGPALQVELLR	H
1	Pavir.Aa01274.1.p|PACid:30249038	Pavir.Aa01274.1.p|PACid:30249038	9225	84483	441	441	38	38	43.5	5.96	344798	1	1	0	514.317	2053.24	4	2053.24	-0.0038	2	16.28	14	28	0.03	R	RTKDGPALQVELLR	H
1	Pavir.Aa01274.1.p|PACid:30249038	Pavir.Aa01274.1.p|PACid:30249038	9225	84483	441	441	38	38	43.5	5.96	351207	1	1	1	693.393	2077.16	3	2077.16	-0.0035	1	67.2	17	31	5e-07	K	KVLTMNPTGDLSTAR	F	Oxidation (M)	0.000010000000000.0
1	Pavir.Aa01274.1.p|PACid:30249038	Pavir.Aa01274.1.p|PACid:30249038	9225	84483	441	441	38	38	43.5	5.96	351208	1	1	1	693.393	2077.16	3	2077.16	-0.0028	1	73.39	17	31	1.3e-07	K	KVLTMNPTGDLSTAR	F	Oxidation (M)	0.000010000000000.0
1	Pavir.Aa01274.1.p|PACid:30249038	Pavir.Aa01274.1.p|PACid:30249038	9225	84483	441	441	38	38	43.5	5.96	351210	1	1	1	693.394	2077.16	3	2077.16	-0.0019	1	72.67	19	31	2.7e-07	K	KVLTMNPTGDLSTAR	F	Oxidation (M)	0.000010000000000.0
1	Pavir.Aa01274.1.p|PACid:30249038	Pavir.Aa01274.1.p|PACid:30249038	9225	84483	441	441	38	38	43.5	5.96	397353	1	1	0	1136.07	2270.14	2	2270.14	-0.0076	0	46.45	17	30	6.1e-05	K	ALHGGNFQGTPIGVSMDNAR	L
1	Pavir.Aa01274.1.p|PACid:30249038	Pavir.Aa01274.1.p|PACid:30249038	9225	84483	441	441	38	38	43.5	5.96	397357	1	1	0	568.541	2270.14	4	2270.14	-0.0065	0	48.98	16	30	2.6e-05	K	ALHGGNFQGTPIGVSMDNAR	L
1	Pavir.Aa01274.1.p|PACid:30249038	Pavir.Aa01274.1.p|PACid:30249038	9225	84483	441	441	38	38	43.5	5.96	397359	1	1	0	568.542	2270.14	4	2270.14	-0.006	0	40.76	15	30	0.00015	K	ALHGGNFQGTPIGVSMDNAR	L
1	Pavir.Aa01274.1.p|PACid:30249038	Pavir.Aa01274.1.p|PACid:30249038	9225	84483	441	441	38	38	43.5	5.96	397362	1	1	0	1136.08	2270.14	2	2270.14	-0.0039	0	20.05	16	30	0.021	K	ALHGGNFQGTPIGVSMDNAR	L
1	Pavir.Aa01274.1.p|PACid:30249038	Pavir.Aa01274.1.p|PACid:30249038	9225	84483	441	441	38	38	43.5	5.96	397363	1	1	0	757.72	2270.14	3	2270.14	-0.0039	0	31.64	14	30	0.0011	K	ALHGGNFQGTPIGVSMDNAR	L
1	Pavir.Aa01274.1.p|PACid:30249038	Pavir.Aa01274.1.p|PACid:30249038	9225	84483	441	441	38	38	43.5	5.96	397364	1	1	0	757.72	2270.14	3	2270.14	-0.0035	0	18.9	14	30	0.017	K	ALHGGNFQGTPIGVSMDNAR	L
1	Pavir.Aa01274.1.p|PACid:30249038	Pavir.Aa01274.1.p|PACid:30249038	9225	84483	441	441	38	38	43.5	5.96	397365	1	1	0	757.72	2270.14	3	2270.14	-0.0035	0	40.19	15	30	0.00017	K	ALHGGNFQGTPIGVSMDNAR	L
1	Pavir.Aa01274.1.p|PACid:30249038	Pavir.Aa01274.1.p|PACid:30249038	9225	84483	441	441	38	38	43.5	5.96	397366	1	1	0	757.72	2270.14	3	2270.14	-0.0035	0	65.47	17	30	7.3e-07	K	ALHGGNFQGTPIGVSMDNAR	L
1	Pavir.Aa01274.1.p|PACid:30249038	Pavir.Aa01274.1.p|PACid:30249038	9225	84483	441	441	38	38	43.5	5.96	397367	1	1	0	757.721	2270.14	3	2270.14	-0.0032	0	51.48	16	30	1.5e-05	K	ALHGGNFQGTPIGVSMDNAR	L
1	Pavir.Aa01274.1.p|PACid:30249038	Pavir.Aa01274.1.p|PACid:30249038	9225	84483	441	441	38	38	43.5	5.96	397368	1	1	0	757.721	2270.14	3	2270.14	-0.003	0	48.8	21	30	9.5e-05	K	ALHGGNFQGTPIGVSMDNAR	L
1	Pavir.Aa01274.1.p|PACid:30249038	Pavir.Aa01274.1.p|PACid:30249038	9225	84483	441	441	38	38	43.5	5.96	397369	1	1	0	757.721	2270.14	3	2270.14	-0.0026	0	44.91	15	30	6.1e-05	K	ALHGGNFQGTPIGVSMDNAR	L
1	Pavir.Aa01274.1.p|PACid:30249038	Pavir.Aa01274.1.p|PACid:30249038	9225	84483	441	441	38	38	43.5	5.96	397372	1	1	0	757.721	2270.14	3	2270.14	-0.0015	0	50.58	16	30	1.8e-05	K	ALHGGNFQGTPIGVSMDNAR	L
1	Pavir.Aa01274.1.p|PACid:30249038	Pavir.Aa01274.1.p|PACid:30249038	9225	84483	441	441	38	38	43.5	5.96	397373	1	1	0	757.721	2270.14	3	2270.14	-0.0013	0	65.64	17	30	8.3e-07	K	ALHGGNFQGTPIGVSMDNAR	L
1	Pavir.Aa01274.1.p|PACid:30249038	Pavir.Aa01274.1.p|PACid:30249038	9225	84483	441	441	38	38	43.5	5.96	397374	1	1	0	757.721	2270.14	3	2270.14	-0.0012	0	57.14	16	30	4.4e-06	K	ALHGGNFQGTPIGVSMDNAR	L
1	Pavir.Aa01274.1.p|PACid:30249038	Pavir.Aa01274.1.p|PACid:30249038	9225	84483	441	441	38	38	43.5	5.96	397523	1	1	0	758.047	2271.12	3	2271.13	-0.0065	0	38.76	15	29	0.00023	K	ALHGGNFQGTPIGVSMDNAR	L	Deamidated (NQ)	0.00000200000000000000.0
1	Pavir.Aa01274.1.p|PACid:30249038	Pavir.Aa01274.1.p|PACid:30249038	9225	84483	441	441	38	38	43.5	5.96	397525	1	1	0	758.048	2271.12	3	2271.13	-0.0041	0	53.71	16	29	9.2e-06	K	ALHGGNFQGTPIGVSMDNAR	L	Deamidated (NQ)	0.00000000000000000200.0
1	Pavir.Aa01274.1.p|PACid:30249038	Pavir.Aa01274.1.p|PACid:30249038	9225	84483	441	441	38	38	43.5	5.96	397526	1	1	0	758.048	2271.12	3	2271.13	-0.0032	0	47.63	15	29	3.4e-05	K	ALHGGNFQGTPIGVSMDNAR	L	Deamidated (NQ)	0.00000000000000000200.0
1	Pavir.Aa01274.1.p|PACid:30249038	Pavir.Aa01274.1.p|PACid:30249038	9225	84483	441	441	38	38	43.5	5.96	400445	1	1	0	763.051	2286.13	3	2286.14	-0.0077	0	33.58	18	29	0.0016	K	ALHGGNFQGTPIGVSMDNAR	L	Oxidation (M)	0.00000000000000010000.0
1	Pavir.Aa01274.1.p|PACid:30249038	Pavir.Aa01274.1.p|PACid:30249038	9225	84483	441	441	38	38	43.5	5.96	400446	1	1	0	763.051	2286.13	3	2286.14	-0.0073	0	49.32	16	29	2.4e-05	K	ALHGGNFQGTPIGVSMDNAR	L	Oxidation (M)	0.00000000000000010000.0
1	Pavir.Aa01274.1.p|PACid:30249038	Pavir.Aa01274.1.p|PACid:30249038	9225	84483	441	441	38	38	43.5	5.96	400449	1	1	0	763.051	2286.13	3	2286.14	-0.0058	0	61.25	16	29	1.8e-06	K	ALHGGNFQGTPIGVSMDNAR	L	Oxidation (M)	0.00000000000000010000.0
1	Pavir.Aa01274.1.p|PACid:30249038	Pavir.Aa01274.1.p|PACid:30249038	9225	84483	441	441	38	38	43.5	5.96	400452	1	1	0	763.051	2286.13	3	2286.14	-0.0057	0	56.67	21	29	1.7e-05	K	ALHGGNFQGTPIGVSMDNAR	L	Oxidation (M)	0.00000000000000010000.0
1	Pavir.Aa01274.1.p|PACid:30249038	Pavir.Aa01274.1.p|PACid:30249038	9225	84483	441	441	38	38	43.5	5.96	400454	1	1	0	763.051	2286.13	3	2286.14	-0.0055	0	60.82	16	29	2e-06	K	ALHGGNFQGTPIGVSMDNAR	L	Oxidation (M)	0.00000000000000010000.0
1	Pavir.Aa01274.1.p|PACid:30249038	Pavir.Aa01274.1.p|PACid:30249038	9225	84483	441	441	38	38	43.5	5.96	400456	1	1	0	572.54	2286.13	4	2286.14	-0.005	0	49.38	16	29	2.3e-05	K	ALHGGNFQGTPIGVSMDNAR	L	Oxidation (M)	0.00000000000000010000.0
1	Pavir.Aa01274.1.p|PACid:30249038	Pavir.Aa01274.1.p|PACid:30249038	9225	84483	441	441	38	38	43.5	5.96	400457	1	1	0	763.052	2286.13	3	2286.14	-0.0049	0	17.11	15	29	0.031	K	ALHGGNFQGTPIGVSMDNAR	L	Oxidation (M)	0.00000000000000010000.0
1	Pavir.Aa01274.1.p|PACid:30249038	Pavir.Aa01274.1.p|PACid:30249038	9225	84483	441	441	38	38	43.5	5.96	400459	1	1	0	763.052	2286.13	3	2286.14	-0.0049	0	36.97	15	29	0.00034	K	ALHGGNFQGTPIGVSMDNAR	L	Oxidation (M)	0.00000000000000010000.0
1	Pavir.Aa01274.1.p|PACid:30249038	Pavir.Aa01274.1.p|PACid:30249038	9225	84483	441	441	38	38	43.5	5.96	400460	1	1	0	763.052	2286.13	3	2286.14	-0.0047	0	19.57	14	29	0.015	K	ALHGGNFQGTPIGVSMDNAR	L	Oxidation (M)	0.00000000000000010000.0
1	Pavir.Aa01274.1.p|PACid:30249038	Pavir.Aa01274.1.p|PACid:30249038	9225	84483	441	441	38	38	43.5	5.96	400461	1	1	0	763.052	2286.13	3	2286.14	-0.0045	0	18.93	14	29	0.017	K	ALHGGNFQGTPIGVSMDNAR	L	Oxidation (M)	0.00000000000000010000.0
1	Pavir.Aa01274.1.p|PACid:30249038	Pavir.Aa01274.1.p|PACid:30249038	9225	84483	441	441	38	38	43.5	5.96	400462	1	1	0	763.052	2286.13	3	2286.14	-0.0045	0	46.04	15	29	4.8e-05	K	ALHGGNFQGTPIGVSMDNAR	L	Oxidation (M)	0.00000000000000010000.0
1	Pavir.Aa01274.1.p|PACid:30249038	Pavir.Aa01274.1.p|PACid:30249038	9225	84483	441	441	38	38	43.5	5.96	400464	1	1	0	763.052	2286.13	3	2286.14	-0.0044	0	14.44	13	29	0.044	K	ALHGGNFQGTPIGVSMDNAR	L	Oxidation (M)	0.00000000000000010000.0
1	Pavir.Aa01274.1.p|PACid:30249038	Pavir.Aa01274.1.p|PACid:30249038	9225	84483	441	441	38	38	43.5	5.96	400465	1	1	0	763.052	2286.13	3	2286.14	-0.0044	0	60.95	16	29	1.9e-06	K	ALHGGNFQGTPIGVSMDNAR	L	Oxidation (M)	0.00000000000000010000.0
1	Pavir.Aa01274.1.p|PACid:30249038	Pavir.Aa01274.1.p|PACid:30249038	9225	84483	441	441	38	38	43.5	5.96	400466	1	1	0	763.052	2286.13	3	2286.14	-0.0044	0	27.97	14	29	0.0024	K	ALHGGNFQGTPIGVSMDNAR	L	Oxidation (M)	0.00000000000000010000.0
1	Pavir.Aa01274.1.p|PACid:30249038	Pavir.Aa01274.1.p|PACid:30249038	9225	84483	441	441	38	38	43.5	5.96	400467	1	1	0	763.052	2286.13	3	2286.14	-0.0044	0	64.03	19	29	1.7e-06	K	ALHGGNFQGTPIGVSMDNAR	L	Oxidation (M)	0.00000000000000010000.0
1	Pavir.Aa01274.1.p|PACid:30249038	Pavir.Aa01274.1.p|PACid:30249038	9225	84483	441	441	38	38	43.5	5.96	400469	1	1	0	1144.07	2286.13	2	2286.14	-0.0042	0	36.96	18	29	0.00067	K	ALHGGNFQGTPIGVSMDNAR	L	Oxidation (M)	0.00000000000000010000.0
1	Pavir.Aa01274.1.p|PACid:30249038	Pavir.Aa01274.1.p|PACid:30249038	9225	84483	441	441	38	38	43.5	5.96	400472	1	1	0	763.052	2286.13	3	2286.14	-0.004	0	62.33	18	29	2.2e-06	K	ALHGGNFQGTPIGVSMDNAR	L	Oxidation (M)	0.00000000000000010000.0
1	Pavir.Aa01274.1.p|PACid:30249038	Pavir.Aa01274.1.p|PACid:30249038	9225	84483	441	441	38	38	43.5	5.96	400473	1	1	0	1144.07	2286.13	2	2286.14	-0.0039	0	70.01	17	30	2.7e-07	K	ALHGGNFQGTPIGVSMDNAR	L	Oxidation (M)	0.00000000000000010000.0
1	Pavir.Aa01274.1.p|PACid:30249038	Pavir.Aa01274.1.p|PACid:30249038	9225	84483	441	441	38	38	43.5	5.96	400475	1	1	0	763.052	2286.13	3	2286.14	-0.0038	0	63.92	18	30	1.3e-06	K	ALHGGNFQGTPIGVSMDNAR	L	Oxidation (M)	0.00000000000000010000.0
1	Pavir.Aa01274.1.p|PACid:30249038	Pavir.Aa01274.1.p|PACid:30249038	9225	84483	441	441	38	38	43.5	5.96	400476	1	1	0	572.541	2286.13	4	2286.14	-0.0036	0	52.67	16	30	1.2e-05	K	ALHGGNFQGTPIGVSMDNAR	L	Oxidation (M)	0.00000000000000010000.0
1	Pavir.Aa01274.1.p|PACid:30249038	Pavir.Aa01274.1.p|PACid:30249038	9225	84483	441	441	38	38	43.5	5.96	400478	1	1	0	763.052	2286.13	3	2286.14	-0.0035	0	43.44	15	30	8.4e-05	K	ALHGGNFQGTPIGVSMDNAR	L	Oxidation (M)	0.00000000000000010000.0
1	Pavir.Aa01274.1.p|PACid:30249038	Pavir.Aa01274.1.p|PACid:30249038	9225	84483	441	441	38	38	43.5	5.96	400481	1	1	0	572.541	2286.13	4	2286.14	-0.0031	0	37	15	30	0.00034	K	ALHGGNFQGTPIGVSMDNAR	L	Oxidation (M)	0.00000000000000010000.0
1	Pavir.Aa01274.1.p|PACid:30249038	Pavir.Aa01274.1.p|PACid:30249038	9225	84483	441	441	38	38	43.5	5.96	400484	1	1	0	763.052	2286.14	3	2286.14	-0.0027	0	53.94	16	30	8.8e-06	K	ALHGGNFQGTPIGVSMDNAR	L	Oxidation (M)	0.00000000000000010000.0
1	Pavir.Aa01274.1.p|PACid:30249038	Pavir.Aa01274.1.p|PACid:30249038	9225	84483	441	441	38	38	43.5	5.96	400485	1	1	0	763.052	2286.14	3	2286.14	-0.0027	0	58.18	16	30	3.5e-06	K	ALHGGNFQGTPIGVSMDNAR	L	Oxidation (M)	0.00000000000000010000.0
1	Pavir.Aa01274.1.p|PACid:30249038	Pavir.Aa01274.1.p|PACid:30249038	9225	84483	441	441	38	38	43.5	5.96	400488	1	1	0	763.053	2286.14	3	2286.14	-0.0022	0	40.76	15	30	0.00015	K	ALHGGNFQGTPIGVSMDNAR	L	Oxidation (M)	0.00000000000000010000.0
1	Pavir.Aa01274.1.p|PACid:30249038	Pavir.Aa01274.1.p|PACid:30249038	9225	84483	441	441	38	38	43.5	5.96	400489	1	1	0	763.053	2286.14	3	2286.14	-0.0022	0	44.89	15	30	6.2e-05	K	ALHGGNFQGTPIGVSMDNAR	L	Oxidation (M)	0.00000000000000010000.0
1	Pavir.Aa01274.1.p|PACid:30249038	Pavir.Aa01274.1.p|PACid:30249038	9225	84483	441	441	38	38	43.5	5.96	400496	1	1	0	763.053	2286.14	3	2286.14	-0.0015	0	36.63	15	30	0.00037	K	ALHGGNFQGTPIGVSMDNAR	L	Oxidation (M)	0.00000000000000010000.0
1	Pavir.Aa01274.1.p|PACid:30249038	Pavir.Aa01274.1.p|PACid:30249038	9225	84483	441	441	38	38	43.5	5.96	400497	1	1	0	1144.08	2286.14	2	2286.14	-0.0012	0	60.48	16	30	2.1e-06	K	ALHGGNFQGTPIGVSMDNAR	L	Oxidation (M)	0.00000000000000010000.0
1	Pavir.Aa01274.1.p|PACid:30249038	Pavir.Aa01274.1.p|PACid:30249038	9225	84483	441	441	38	38	43.5	5.96	400498	1	1	0	763.053	2286.14	3	2286.14	-0.0011	0	14.09	13	30	0.048	K	ALHGGNFQGTPIGVSMDNAR	L	Oxidation (M)	0.00000000000000010000.0
1	Pavir.Aa01274.1.p|PACid:30249038	Pavir.Aa01274.1.p|PACid:30249038	9225	84483	441	441	38	38	43.5	5.96	400499	1	1	0	763.053	2286.14	3	2286.14	-0.0011	0	20.85	14	30	0.011	K	ALHGGNFQGTPIGVSMDNAR	L	Oxidation (M)	0.00000000000000010000.0
1	Pavir.Aa01274.1.p|PACid:30249038	Pavir.Aa01274.1.p|PACid:30249038	9225	84483	441	441	38	38	43.5	5.96	400500	1	1	0	763.053	2286.14	3	2286.14	-0.0011	0	65.59	17	30	7.1e-07	K	ALHGGNFQGTPIGVSMDNAR	L	Oxidation (M)	0.00000000000000010000.0
1	Pavir.Aa01274.1.p|PACid:30249038	Pavir.Aa01274.1.p|PACid:30249038	9225	84483	441	441	38	38	43.5	5.96	400503	1	1	0	763.053	2286.14	3	2286.14	-0.0005	0	43.49	15	30	8.4e-05	K	ALHGGNFQGTPIGVSMDNAR	L	Oxidation (M)	0.00000000000000010000.0
1	Pavir.Aa01274.1.p|PACid:30249038	Pavir.Aa01274.1.p|PACid:30249038	9225	84483	441	441	38	38	43.5	5.96	400514	1	1	0	763.058	2286.15	3	2286.14	0.0158	0	33.84	16	30	0.001	K	ALHGGNFQGTPIGVSMDNAR	L	Oxidation (M)	0.00000000000000010000.0
1	Pavir.Aa01274.1.p|PACid:30249038	Pavir.Aa01274.1.p|PACid:30249038	9225	84483	441	441	38	38	43.5	5.96	400718	1	1	0	763.38	2287.12	3	2287.12	-0.0053	0	47.45	15	29	3.6e-05	K	ALHGGNFQGTPIGVSMDNAR	L	Oxidation (M); Deamidated (NQ)	0.00000200000000010000.0
1	Pavir.Aa01274.1.p|PACid:30249038	Pavir.Aa01274.1.p|PACid:30249038	9225	84483	441	441	38	38	43.5	5.96	400719	1	1	0	763.38	2287.12	3	2287.12	-0.0051	0	17.63	14	29	0.022	K	ALHGGNFQGTPIGVSMDNAR	L	Oxidation (M); Deamidated (NQ)	0.00000000000000010200.0
1	Pavir.Aa01274.1.p|PACid:30249038	Pavir.Aa01274.1.p|PACid:30249038	9225	84483	441	441	38	38	43.5	5.96	400720	1	1	0	763.38	2287.12	3	2287.12	-0.0044	0	56.07	16	29	5.5e-06	K	ALHGGNFQGTPIGVSMDNAR	L	Oxidation (M); Deamidated (NQ)	0.00000002000000010000.0
1	Pavir.Aa01274.1.p|PACid:30249038	Pavir.Aa01274.1.p|PACid:30249038	9225	84483	441	441	38	38	43.5	5.96	400722	1	1	0	763.38	2287.12	3	2287.12	-0.0029	0	45.97	15	29	4.9e-05	K	ALHGGNFQGTPIGVSMDNAR	L	Oxidation (M); Deamidated (NQ)	0.00000000000000010200.0
1	Pavir.Aa01274.1.p|PACid:30249038	Pavir.Aa01274.1.p|PACid:30249038	9225	84483	441	441	38	38	43.5	5.96	400723	1	1	0	763.38	2287.12	3	2287.12	-0.0025	0	45.62	15	29	5.3e-05	K	ALHGGNFQGTPIGVSMDNAR	L	Oxidation (M); Deamidated (NQ)	0.00000200000000010000.0
1	Pavir.Aa01274.1.p|PACid:30249038	Pavir.Aa01274.1.p|PACid:30249038	9225	84483	441	441	38	38	43.5	5.96	400724	1	1	0	763.381	2287.12	3	2287.12	-0.0014	0	36.4	15	29	0.00039	K	ALHGGNFQGTPIGVSMDNAR	L	Oxidation (M); Deamidated (NQ)	0.00000002000000010000.0
1	Pavir.Aa01274.1.p|PACid:30249038	Pavir.Aa01274.1.p|PACid:30249038	9225	84483	441	441	38	38	43.5	5.96	400729	1	1	0	763.383	2287.13	3	2287.12	0.0053	0	29.23	14	30	0.0018	K	ALHGGNFQGTPIGVSMDNAR	L	Oxidation (M); Deamidated (NQ)	0.00000002000000010000.0
1	Pavir.Aa01274.1.p|PACid:30249038	Pavir.Aa01274.1.p|PACid:30249038	9225	84483	441	441	38	38	43.5	5.96	400734	1	1	0	1144.57	2287.13	2	2287.12	0.0116	0	29.97	14	30	0.0015	K	ALHGGNFQGTPIGVSMDNAR	L	Oxidation (M); Deamidated (NQ)	0.00000002000000010000.0
1	Pavir.Aa01274.1.p|PACid:30249038	Pavir.Aa01274.1.p|PACid:30249038	9225	84483	441	441	38	38	43.5	5.96	400737	1	1	0	763.385	2287.13	3	2287.12	0.0121	0	32.58	15	30	0.00088	K	ALHGGNFQGTPIGVSMDNAR	L	Oxidation (M); Deamidated (NQ)	0.00000000000000010200.0
1	Pavir.Aa01274.1.p|PACid:30249038	Pavir.Aa01274.1.p|PACid:30249038	9225	84483	441	441	38	38	43.5	5.96	400750	1	1	0	763.387	2287.14	3	2287.12	0.0172	0	46.64	15	30	4.2e-05	K	ALHGGNFQGTPIGVSMDNAR	L	Oxidation (M); Deamidated (NQ)	0.00000002000000010000.0
1	Pavir.Aa01274.1.p|PACid:30249038	Pavir.Aa01274.1.p|PACid:30249038	9225	84483	441	441	38	38	43.5	5.96	400754	1	1	0	763.388	2287.14	3	2287.12	0.0189	0	26.4	14	30	0.0033	K	ALHGGNFQGTPIGVSMDNAR	L	Oxidation (M); Deamidated (NQ)	0.00000002000000010000.0
1	Pavir.Aa01274.1.p|PACid:30249038	Pavir.Aa01274.1.p|PACid:30249038	9225	84483	441	441	38	38	43.5	5.96	400755	1	1	0	763.388	2287.14	3	2287.12	0.0196	0	34.75	15	30	0.00055	K	ALHGGNFQGTPIGVSMDNAR	L	Oxidation (M); Deamidated (NQ)	0.00000002000000010000.0
1	Pavir.Aa01274.1.p|PACid:30249038	Pavir.Aa01274.1.p|PACid:30249038	9225	84483	441	441	38	38	43.5	5.96	426298	1	1	0	807.76	2420.26	3	2420.26	-0.0032	1	15.53	13	31	0.035	K	SIEREVNSVNDNPVIDVHR	G
1	Pavir.Aa01274.1.p|PACid:30249038	Pavir.Aa01274.1.p|PACid:30249038	9225	84483	441	441	38	38	43.5	5.96	426301	1	1	0	807.76	2420.26	3	2420.26	-0.0027	1	32.65	15	31	0.00087	K	SIEREVNSVNDNPVIDVHR	G
1	Pavir.Aa01274.1.p|PACid:30249038	Pavir.Aa01274.1.p|PACid:30249038	9225	84483	441	441	38	38	43.5	5.96	426304	1	1	0	606.072	2420.26	4	2420.26	-0.0026	1	20.4	14	31	0.012	K	SIEREVNSVNDNPVIDVHR	G
1	Pavir.Aa01274.1.p|PACid:30249038	Pavir.Aa01274.1.p|PACid:30249038	9225	84483	441	441	38	38	43.5	5.96	426305	1	1	0	606.072	2420.26	4	2420.26	-0.0026	1	25.05	14	31	0.0045	K	SIEREVNSVNDNPVIDVHR	G
1	Pavir.Aa01274.1.p|PACid:30249038	Pavir.Aa01274.1.p|PACid:30249038	9225	84483	441	441	38	38	43.5	5.96	426506	1	1	0	606.317	2421.24	4	2421.25	-0.0061	1	20.1	14	31	0.013	K	SIEREVNSVNDNPVIDVHR	G	Deamidated (NQ)	0.0000000002000000000.0
1	Pavir.Aa01274.1.p|PACid:30249038	Pavir.Aa01274.1.p|PACid:30249038	9225	84483	441	441	38	38	43.5	5.96	426508	1	1	0	606.317	2421.24	4	2421.25	-0.0049	1	21.44	20	31	0.037	K	SIEREVNSVNDNPVIDVHR	G	Deamidated (NQ)	0.0000002000000000000.0
1	Pavir.Aa01274.1.p|PACid:30249038	Pavir.Aa01274.1.p|PACid:30249038	9225	84483	441	441	38	38	43.5	5.96	426509	1	1	0	606.317	2421.24	4	2421.25	-0.0042	1	32.28	15	31	0.00094	K	SIEREVNSVNDNPVIDVHR	G	Deamidated (NQ)	0.0000002000000000000.0
1	Pavir.Aa01274.1.p|PACid:30249038	Pavir.Aa01274.1.p|PACid:30249038	9225	84483	441	441	38	38	43.5	5.96	426510	1	1	0	606.317	2421.24	4	2421.25	-0.0042	1	31.55	14	31	0.0011	K	SIEREVNSVNDNPVIDVHR	G	Deamidated (NQ)	0.0000002000000000000.0
1	Pavir.Aa01274.1.p|PACid:30249038	Pavir.Aa01274.1.p|PACid:30249038	9225	84483	441	441	38	38	43.5	5.96	426515	1	1	0	808.088	2421.24	3	2421.25	-0.0031	1	30.52	14	31	0.0014	K	SIEREVNSVNDNPVIDVHR	G	Deamidated (NQ)	0.0000002000000000000.0
1	Pavir.Aa01274.1.p|PACid:30249038	Pavir.Aa01274.1.p|PACid:30249038	9225	84483	441	441	38	38	43.5	5.96	426516	1	1	0	808.088	2421.24	3	2421.25	-0.0031	1	70.96	21	31	5.4e-07	K	SIEREVNSVNDNPVIDVHR	G	Deamidated (NQ)	0.0000002000000000000.0
1	Pavir.Aa01274.1.p|PACid:30249038	Pavir.Aa01274.1.p|PACid:30249038	9225	84483	441	441	38	38	43.5	5.96	426517	1	1	0	808.088	2421.24	3	2421.25	-0.0023	1	41.3	16	31	0.00017	K	SIEREVNSVNDNPVIDVHR	G	Deamidated (NQ)	0.0000000002000000000.0
1	Pavir.Aa01274.1.p|PACid:30249038	Pavir.Aa01274.1.p|PACid:30249038	9225	84483	441	441	38	38	43.5	5.96	426519	1	1	0	606.318	2421.24	4	2421.25	-0.002	1	34.4	15	31	0.00059	K	SIEREVNSVNDNPVIDVHR	G	Deamidated (NQ)	0.0000002000000000000.0
1	Pavir.Aa01274.1.p|PACid:30249038	Pavir.Aa01274.1.p|PACid:30249038	9225	84483	441	441	38	38	43.5	5.96	426525	1	1	0	808.093	2421.26	3	2421.25	0.013	1	17.88	14	31	0.021	K	SIEREVNSVNDNPVIDVHR	G	Deamidated (NQ)	0.0000000000020000000.0
1	Pavir.Aa01274.1.p|PACid:30249038	Pavir.Aa01274.1.p|PACid:30249038	9225	84483	441	441	38	38	43.5	5.96	426687	1	1	0	606.563	2422.22	4	2422.23	-0.0043	1	54.14	17	30	1.2e-05	K	SIEREVNSVNDNPVIDVHR	G	2 Deamidated (NQ)	0.0000002002000000000.0
1	Pavir.Aa01274.1.p|PACid:30249038	Pavir.Aa01274.1.p|PACid:30249038	9225	84483	441	441	38	38	43.5	5.96	426689	1	1	0	606.564	2422.23	4	2422.23	-0.0036	1	31.6	14	30	0.0011	K	SIEREVNSVNDNPVIDVHR	G	2 Deamidated (NQ)	0.0000002002000000000.0
1	Pavir.Aa01274.1.p|PACid:30249038	Pavir.Aa01274.1.p|PACid:30249038	9225	84483	441	441	38	38	43.5	5.96	426694	1	1	0	808.419	2422.24	3	2422.23	0.0066	1	15.99	13	30	0.032	K	SIEREVNSVNDNPVIDVHR	G	2 Deamidated (NQ)	0.0000002002000000000.0
1	Pavir.Aa01274.1.p|PACid:30249038	Pavir.Aa01274.1.p|PACid:30249038	9225	84483	441	441	38	38	43.5	5.96	426700	1	1	0	808.422	2422.24	3	2422.23	0.0156	1	39.35	22	31	0.0011	K	SIEREVNSVNDNPVIDVHR	G	2 Deamidated (NQ)	0.0000000002020000000.0
1	Pavir.Aa01274.1.p|PACid:30249038	Pavir.Aa01274.1.p|PACid:30249038	9225	84483	441	441	38	38	43.5	5.96	460569	1	1	1	527.875	2634.34	5	2634.35	-0.0052	1	17.96	14	31	0.021	R	HLNAGIFGNDRDGHTLPSETVR	A
1	Pavir.Aa01274.1.p|PACid:30249038	Pavir.Aa01274.1.p|PACid:30249038	9225	84483	441	441	38	38	43.5	5.96	460570	1	1	1	879.121	2634.34	3	2634.35	-0.0049	1	16.04	14	31	0.031	R	HLNAGIFGNDRDGHTLPSETVR	A
1	Pavir.Aa01274.1.p|PACid:30249038	Pavir.Aa01274.1.p|PACid:30249038	9225	84483	441	441	38	38	43.5	5.96	460573	1	1	1	527.876	2634.34	5	2634.35	-0.004	1	19.76	14	31	0.014	R	HLNAGIFGNDRDGHTLPSETVR	A
1	Pavir.Aa01274.1.p|PACid:30249038	Pavir.Aa01274.1.p|PACid:30249038	9225	84483	441	441	38	38	43.5	5.96	460574	1	1	1	527.876	2634.34	5	2634.35	-0.004	1	16.36	14	31	0.029	R	HLNAGIFGNDRDGHTLPSETVR	A
1	Pavir.Aa01274.1.p|PACid:30249038	Pavir.Aa01274.1.p|PACid:30249038	9225	84483	441	441	38	38	43.5	5.96	460576	1	1	1	659.593	2634.34	4	2634.35	-0.0031	1	30.83	14	31	0.0013	R	HLNAGIFGNDRDGHTLPSETVR	A
1	Pavir.Aa01274.1.p|PACid:30249038	Pavir.Aa01274.1.p|PACid:30249038	9225	84483	441	441	38	38	43.5	5.96	460703	1	1	1	528.072	2635.32	5	2635.33	-0.0059	1	19.29	14	30	0.016	R	HLNAGIFGNDRDGHTLPSETVR	A	Deamidated (NQ)	0.0000000020000000000000.0
1	Pavir.Aa01274.1.p|PACid:30249038	Pavir.Aa01274.1.p|PACid:30249038	9225	84483	441	441	38	38	43.5	5.96	460704	1	1	1	528.073	2635.33	5	2635.33	-0.0001	1	39.28	15	31	0.00021	R	HLNAGIFGNDRDGHTLPSETVR	A	Deamidated (NQ)	0.0000000020000000000000.0
1	Pavir.Aa01274.1.p|PACid:30249038	Pavir.Aa01274.1.p|PACid:30249038	9225	84483	441	441	38	38	43.5	5.96	467870	1	1	0	672.111	2684.41	4	2684.42	-0.008	1	23.53	14	31	0.0062	R	GKALHGGNFQGTPIGVSMDNAR	L
1	Pavir.Aa01274.1.p|PACid:30249038	Pavir.Aa01274.1.p|PACid:30249038	9225	84483	441	441	38	38	43.5	5.96	470055	1	1	0	676.111	2700.41	4	2700.42	-0.0039	1	23.14	14	32	0.0068	R	GKALHGGNFQGTPIGVSMDNAR	L	Oxidation (M)	0.0000000000000000010000.0
1	Pavir.Aa01274.1.p|PACid:30249038	Pavir.Aa01274.1.p|PACid:30249038	9225	84483	441	441	38	38	43.5	5.96	470056	1	1	0	901.145	2700.41	3	2700.42	-0.003	1	60.04	16	32	2.3e-06	R	GKALHGGNFQGTPIGVSMDNAR	L	Oxidation (M)	0.0000000000000000010000.0
1	Pavir.Aa01274.1.p|PACid:30249038	Pavir.Aa01274.1.p|PACid:30249038	9225	84483	441	441	38	38	43.5	5.96	470057	1	1	0	901.146	2700.41	3	2700.42	-0.0023	1	32.3	15	32	0.00094	R	GKALHGGNFQGTPIGVSMDNAR	L	Oxidation (M)	0.0000000000000000010000.0
1	Pavir.Aa01274.1.p|PACid:30249038	Pavir.Aa01274.1.p|PACid:30249038	9225	84483	441	441	38	38	43.5	5.96	470062	1	1	0	676.113	2700.42	4	2700.42	0.0059	1	25.31	14	32	0.0042	R	GKALHGGNFQGTPIGVSMDNAR	L	Oxidation (M)	0.0000000000000000010000.0
1	Pavir.Aa01274.1.p|PACid:30249038	Pavir.Aa01274.1.p|PACid:30249038	9225	84483	441	441	38	38	43.5	5.96	470154	1	1	0	901.479	2701.41	3	2701.4	0.0136	1	51.04	16	31	1.6e-05	R	GKALHGGNFQGTPIGVSMDNAR	L	Oxidation (M); Deamidated (NQ)	0.0000000200000000010000.0
1	Pavir.Aa01274.1.p|PACid:30249038	Pavir.Aa01274.1.p|PACid:30249038	9225	84483	441	441	38	38	43.5	5.96	480534	1	1	0	924.834	2771.48	3	2771.49	-0.006	1	14.47	13	32	0.044	R	AVLVDHALSSGDAEREPSVFSK	I
1	Pavir.Aa01274.1.p|PACid:30249038	Pavir.Aa01274.1.p|PACid:30249038	9225	84483	441	441	38	38	43.5	5.96	480535	1	1	0	693.877	2771.48	4	2771.49	-0.0055	1	16.55	14	31	0.028	R	AVLVDHALSSGDAEREPSVFSK	I
1	Pavir.Aa01274.1.p|PACid:30249038	Pavir.Aa01274.1.p|PACid:30249038	9225	84483	441	441	38	38	43.5	5.96	480536	1	1	0	924.834	2771.48	3	2771.49	-0.0054	1	32.58	15	31	0.00088	R	AVLVDHALSSGDAEREPSVFSK	I
1	Pavir.Aa01274.1.p|PACid:30249038	Pavir.Aa01274.1.p|PACid:30249038	9225	84483	441	441	38	38	43.5	5.96	480537	1	1	0	555.303	2771.48	5	2771.49	-0.005	1	14.95	13	32	0.04	R	AVLVDHALSSGDAEREPSVFSK	I
1	Pavir.Aa01274.1.p|PACid:30249038	Pavir.Aa01274.1.p|PACid:30249038	9225	84483	441	441	38	38	43.5	5.96	480540	1	1	0	693.878	2771.48	4	2771.49	-0.0046	1	23.3	14	32	0.0067	R	AVLVDHALSSGDAEREPSVFSK	I
1	Pavir.Aa01274.1.p|PACid:30249038	Pavir.Aa01274.1.p|PACid:30249038	9225	84483	441	441	38	38	43.5	5.96	480543	1	1	0	693.878	2771.48	4	2771.49	-0.0033	1	32.44	15	32	0.00091	R	AVLVDHALSSGDAEREPSVFSK	I
1	Pavir.Aa01274.1.p|PACid:30249038	Pavir.Aa01274.1.p|PACid:30249038	9225	84483	441	441	38	38	43.5	5.96	480544	1	1	0	924.835	2771.48	3	2771.49	-0.0033	1	42.44	15	32	0.0001	R	AVLVDHALSSGDAEREPSVFSK	I
1	Pavir.Aa01274.1.p|PACid:30249038	Pavir.Aa01274.1.p|PACid:30249038	9225	84483	441	441	38	38	43.5	5.96	480545	1	1	0	555.304	2771.48	5	2771.49	-0.0032	1	14.13	13	32	0.047	R	AVLVDHALSSGDAEREPSVFSK	I
1	Pavir.Aa01274.1.p|PACid:30249038	Pavir.Aa01274.1.p|PACid:30249038	9225	84483	441	441	38	38	43.5	5.96	480546	1	1	0	693.878	2771.48	4	2771.49	-0.0031	1	21.66	14	32	0.0093	R	AVLVDHALSSGDAEREPSVFSK	I
1	Pavir.Aa01274.1.p|PACid:30249038	Pavir.Aa01274.1.p|PACid:30249038	9225	84483	441	441	38	38	43.5	5.96	480547	1	1	0	693.878	2771.48	4	2771.49	-0.0031	1	33.29	15	32	0.00076	R	AVLVDHALSSGDAEREPSVFSK	I
1	Pavir.Aa01274.1.p|PACid:30249038	Pavir.Aa01274.1.p|PACid:30249038	9225	84483	441	441	38	38	43.5	5.96	480548	1	1	0	693.878	2771.48	4	2771.49	-0.0031	1	26.41	14	32	0.0033	R	AVLVDHALSSGDAEREPSVFSK	I
1	Pavir.Aa01274.1.p|PACid:30249038	Pavir.Aa01274.1.p|PACid:30249038	9225	84483	441	441	38	38	43.5	5.96	480549	1	1	0	693.878	2771.48	4	2771.49	-0.0031	1	21.62	14	32	0.0094	R	AVLVDHALSSGDAEREPSVFSK	I
1	Pavir.Aa01274.1.p|PACid:30249038	Pavir.Aa01274.1.p|PACid:30249038	9225	84483	441	441	38	38	43.5	5.96	480550	1	1	0	693.878	2771.48	4	2771.49	-0.0029	1	14.66	14	32	0.044	R	AVLVDHALSSGDAEREPSVFSK	I
1	Pavir.Aa01274.1.p|PACid:30249038	Pavir.Aa01274.1.p|PACid:30249038	9225	84483	441	441	38	38	43.5	5.96	480551	1	1	0	693.878	2771.48	4	2771.49	-0.0024	1	25.91	14	32	0.0037	R	AVLVDHALSSGDAEREPSVFSK	I
1	Pavir.Aa01274.1.p|PACid:30249038	Pavir.Aa01274.1.p|PACid:30249038	9225	84483	441	441	38	38	43.5	5.96	480554	1	1	0	924.836	2771.48	3	2771.49	-0.0011	1	36.96	15	32	0.00034	R	AVLVDHALSSGDAEREPSVFSK	I
1	Pavir.Aa01274.1.p|PACid:30249038	Pavir.Aa01274.1.p|PACid:30249038	9225	84483	441	441	38	38	43.5	5.96	480555	1	1	0	693.879	2771.49	4	2771.49	-0.0009	1	23.42	14	32	0.0064	R	AVLVDHALSSGDAEREPSVFSK	I
1	Pavir.Aa01274.1.p|PACid:30249038	Pavir.Aa01274.1.p|PACid:30249038	9225	84483	441	441	38	38	43.5	5.96	480559	1	1	0	693.879	2771.49	4	2771.49	0.002	1	22.54	14	32	0.0077	R	AVLVDHALSSGDAEREPSVFSK	I					Quantitation summary for protein	126/127C	0.861	342	N/A		N/A	127n/127C	1.054	379	N/A		N/A	128c/127C	1.407	379	N/A
2	Pavir.Ca02597.1.p|PACid:30205664	Pavir.Ca02597.1.p|PACid:30205664	8721	83285	467	467	38	38	47.9	5.13	42854	1	1	0	573.367	1144.72	2	1144.72	-0.0024	0	31.42		28	0.025	R	LIGDAAK	N
2	Pavir.Ca02597.1.p|PACid:30205664	Pavir.Ca02597.1.p|PACid:30205664	8721	83285	467	467	38	38	47.9	5.13	42895	1	1	0	573.367	1144.72	2	1144.72	-0.0018	0	29.74		28	0.038	R	LIGDAAK	N
2	Pavir.Ca02597.1.p|PACid:30205664	Pavir.Ca02597.1.p|PACid:30205664	8721	83285	467	467	38	38	47.9	5.13	42897	1	1	0	573.367	1144.72	2	1144.72	-0.0018	0	30.92		28	0.029	R	LIGDAAK	N
2	Pavir.Ca02597.1.p|PACid:30205664	Pavir.Ca02597.1.p|PACid:30205664	8721	83285	467	467	38	38	47.9	5.13	42907	1	1	0	573.368	1144.72	2	1144.72	-0.0016	0	32.13		28	0.022	R	LIGDAAK	N
2	Pavir.Ca02597.1.p|PACid:30205664	Pavir.Ca02597.1.p|PACid:30205664	8721	83285	467	467	38	38	47.9	5.13	43700	1	1	0	575.347	1148.68	2	1148.68	-0.0021	0	24.27	21	30	0.026	K	ATSVGEK	N
2	Pavir.Ca02597.1.p|PACid:30205664	Pavir.Ca02597.1.p|PACid:30205664	8721	83285	467	467	38	38	47.9	5.13	43704	1	1	0	575.347	1148.68	2	1148.68	-0.0019	0	30.03	24	30	0.014	K	ATSVGEK	N
2	Pavir.Ca02597.1.p|PACid:30205664	Pavir.Ca02597.1.p|PACid:30205664	8721	83285	467	467	38	38	47.9	5.13	43705	1	1	0	575.347	1148.68	2	1148.68	-0.0019	0	23.72	19	30	0.017	K	ATSVGEK	N
2	Pavir.Ca02597.1.p|PACid:30205664	Pavir.Ca02597.1.p|PACid:30205664	8721	83285	467	467	38	38	47.9	5.13	61699	1	1	0	616.373	1230.73	2	1230.73	-0.0016	0	23.2	18	28	0.018	R	DNNLLGK	F
2	Pavir.Ca02597.1.p|PACid:30205664	Pavir.Ca02597.1.p|PACid:30205664	8721	83285	467	467	38	38	47.9	5.13	61700	1	1	0	616.373	1230.73	2	1230.73	-0.0016	0	23.48	18	28	0.014	R	DNNLLGK	F
2	Pavir.Ca02597.1.p|PACid:30205664	Pavir.Ca02597.1.p|PACid:30205664	8721	83285	467	467	38	38	47.9	5.13	61701	1	1	0	616.373	1230.73	2	1230.73	-0.0015	0	24.77	18	28	0.011	R	DNNLLGK	F
2	Pavir.Ca02597.1.p|PACid:30205664	Pavir.Ca02597.1.p|PACid:30205664	8721	83285	467	467	38	38	47.9	5.13	70962	1	1	0	632.381	1262.75	2	1262.75	-0.0016	0	33.02	28	30	0.016	K	ITITNDK	G	Deamidated (NQ)	0.0000200.0
2	Pavir.Ca02597.1.p|PACid:30205664	Pavir.Ca02597.1.p|PACid:30205664	8721	83285	467	467	38	38	47.9	5.13	75694	1	1	0	639.859	1277.7	2	1277.71	-0.0017	0	33.8		29	0.019	K	MVQDAEK	Y
2	Pavir.Ca02597.1.p|PACid:30205664	Pavir.Ca02597.1.p|PACid:30205664	8721	83285	467	467	38	38	47.9	5.13	94013	1	1	0	447.231	1338.67	3	1338.68	-0.0037	0	23.19	14	28	0.0067	K	CMEPVEK	C
2	Pavir.Ca02597.1.p|PACid:30205664	Pavir.Ca02597.1.p|PACid:30205664	8721	83285	467	467	38	38	47.9	5.13	98749	1	1	0	452.563	1354.67	3	1354.67	-0.0031	0	24.4	14	28	0.0051	K	CMEPVEK	C	Oxidation (M)	0.0100000.0
2	Pavir.Ca02597.1.p|PACid:30205664	Pavir.Ca02597.1.p|PACid:30205664	8721	83285	467	467	38	38	47.9	5.13	98750	1	1	0	452.563	1354.67	3	1354.67	-0.0025	0	16.79	14	27	0.027	K	CMEPVEK	C	Oxidation (M)	0.0100000.0
2	Pavir.Ca02597.1.p|PACid:30205664	Pavir.Ca02597.1.p|PACid:30205664	8721	83285	467	467	38	38	47.9	5.13	98756	1	1	0	678.341	1354.67	2	1354.67	-0.002	0	17.03	14	27	0.025	K	CMEPVEK	C	Oxidation (M)	0.0100000.0
2	Pavir.Ca02597.1.p|PACid:30205664	Pavir.Ca02597.1.p|PACid:30205664	8721	83285	467	467	38	38	47.9	5.13	122096	1	1	0	713.929	1425.84	2	1425.85	-0.0066	0	30.58	14	28	0.0014	K	DAGVIAGLNVLR	I
2	Pavir.Ca02597.1.p|PACid:30205664	Pavir.Ca02597.1.p|PACid:30205664	8721	83285	467	467	38	38	47.9	5.13	122103	1	1	0	713.93	1425.85	2	1425.85	-0.0056	0	44.26	27	27	0.00099	K	DAGVIAGLNVLR	I
2	Pavir.Ca02597.1.p|PACid:30205664	Pavir.Ca02597.1.p|PACid:30205664	8721	83285	467	467	38	38	47.9	5.13	122115	1	1	0	713.931	1425.85	2	1425.85	-0.0035	0	67.28		28	6.1e-06	K	DAGVIAGLNVLR	I
2	Pavir.Ca02597.1.p|PACid:30205664	Pavir.Ca02597.1.p|PACid:30205664	8721	83285	467	467	38	38	47.9	5.13	122118	1	1	0	713.931	1425.85	2	1425.85	-0.0034	0	65.4	24	28	3.7e-06	K	DAGVIAGLNVLR	I
2	Pavir.Ca02597.1.p|PACid:30205664	Pavir.Ca02597.1.p|PACid:30205664	8721	83285	467	467	38	38	47.9	5.13	122119	1	1	0	476.29	1425.85	3	1425.85	-0.0034	0	35.2		28	0.0098	K	DAGVIAGLNVLR	I
2	Pavir.Ca02597.1.p|PACid:30205664	Pavir.Ca02597.1.p|PACid:30205664	8721	83285	467	467	38	38	47.9	5.13	122120	1	1	0	476.29	1425.85	3	1425.85	-0.0033	0	57.01		28	6.4e-05	K	DAGVIAGLNVLR	I
2	Pavir.Ca02597.1.p|PACid:30205664	Pavir.Ca02597.1.p|PACid:30205664	8721	83285	467	467	38	38	47.9	5.13	122124	1	1	0	713.931	1425.85	2	1425.85	-0.003	0	52.83		28	0.00018	K	DAGVIAGLNVLR	I
2	Pavir.Ca02597.1.p|PACid:30205664	Pavir.Ca02597.1.p|PACid:30205664	8721	83285	467	467	38	38	47.9	5.13	122129	1	1	0	476.29	1425.85	3	1425.85	-0.0029	0	57.43		28	6.4e-05	K	DAGVIAGLNVLR	I
2	Pavir.Ca02597.1.p|PACid:30205664	Pavir.Ca02597.1.p|PACid:30205664	8721	83285	467	467	38	38	47.9	5.13	122131	1	1	0	713.931	1425.85	2	1425.85	-0.0028	0	36.54		28	0.0078	K	DAGVIAGLNVLR	I
2	Pavir.Ca02597.1.p|PACid:30205664	Pavir.Ca02597.1.p|PACid:30205664	8721	83285	467	467	38	38	47.9	5.13	122133	1	1	0	713.931	1425.85	2	1425.85	-0.0028	0	44.28	22	28	0.0003	K	DAGVIAGLNVLR	I
2	Pavir.Ca02597.1.p|PACid:30205664	Pavir.Ca02597.1.p|PACid:30205664	8721	83285	467	467	38	38	47.9	5.13	122134	1	1	0	476.29	1425.85	3	1425.85	-0.0027	0	54.52		28	0.00012	K	DAGVIAGLNVLR	I
2	Pavir.Ca02597.1.p|PACid:30205664	Pavir.Ca02597.1.p|PACid:30205664	8721	83285	467	467	38	38	47.9	5.13	122138	1	1	0	713.931	1425.85	2	1425.85	-0.0027	0	89.69		28	3.9e-08	K	DAGVIAGLNVLR	I
2	Pavir.Ca02597.1.p|PACid:30205664	Pavir.Ca02597.1.p|PACid:30205664	8721	83285	467	467	38	38	47.9	5.13	122139	1	1	0	476.29	1425.85	3	1425.85	-0.0026	0	42.04	28	28	0.0023	K	DAGVIAGLNVLR	I
2	Pavir.Ca02597.1.p|PACid:30205664	Pavir.Ca02597.1.p|PACid:30205664	8721	83285	467	467	38	38	47.9	5.13	122140	1	1	0	476.29	1425.85	3	1425.85	-0.0025	0	46.82	27	28	0.00053	K	DAGVIAGLNVLR	I
2	Pavir.Ca02597.1.p|PACid:30205664	Pavir.Ca02597.1.p|PACid:30205664	8721	83285	467	467	38	38	47.9	5.13	122141	1	1	0	476.29	1425.85	3	1425.85	-0.0025	0	41.67		28	0.0025	K	DAGVIAGLNVLR	I
2	Pavir.Ca02597.1.p|PACid:30205664	Pavir.Ca02597.1.p|PACid:30205664	8721	83285	467	467	38	38	47.9	5.13	122142	1	1	0	713.931	1425.85	2	1425.85	-0.0025	0	49.76		28	0.00038	K	DAGVIAGLNVLR	I
2	Pavir.Ca02597.1.p|PACid:30205664	Pavir.Ca02597.1.p|PACid:30205664	8721	83285	467	467	38	38	47.9	5.13	122144	1	1	0	713.931	1425.85	2	1425.85	-0.0025	0	81.31		28	2.7e-07	K	DAGVIAGLNVLR	I
2	Pavir.Ca02597.1.p|PACid:30205664	Pavir.Ca02597.1.p|PACid:30205664	8721	83285	467	467	38	38	47.9	5.13	122145	1	1	0	713.931	1425.85	2	1425.85	-0.0024	0	63.9	27	28	1.3e-05	K	DAGVIAGLNVLR	I
2	Pavir.Ca02597.1.p|PACid:30205664	Pavir.Ca02597.1.p|PACid:30205664	8721	83285	467	467	38	38	47.9	5.13	122146	1	1	0	713.931	1425.85	2	1425.85	-0.0024	0	63.1	28	28	1.7e-05	K	DAGVIAGLNVLR	I
2	Pavir.Ca02597.1.p|PACid:30205664	Pavir.Ca02597.1.p|PACid:30205664	8721	83285	467	467	38	38	47.9	5.13	122147	1	1	0	476.29	1425.85	3	1425.85	-0.0024	0	17.64	15	28	0.033	K	DAGVIAGLNVLR	I
2	Pavir.Ca02597.1.p|PACid:30205664	Pavir.Ca02597.1.p|PACid:30205664	8721	83285	467	467	38	38	47.9	5.13	122148	1	1	0	476.29	1425.85	3	1425.85	-0.0024	0	38.77	25	28	0.0025	K	DAGVIAGLNVLR	I
2	Pavir.Ca02597.1.p|PACid:30205664	Pavir.Ca02597.1.p|PACid:30205664	8721	83285	467	467	38	38	47.9	5.13	122149	1	1	0	476.29	1425.85	3	1425.85	-0.0024	0	46.34		28	0.00084	K	DAGVIAGLNVLR	I
2	Pavir.Ca02597.1.p|PACid:30205664	Pavir.Ca02597.1.p|PACid:30205664	8721	83285	467	467	38	38	47.9	5.13	122151	1	1	0	476.29	1425.85	3	1425.85	-0.0023	0	64.22		28	1.4e-05	K	DAGVIAGLNVLR	I
2	Pavir.Ca02597.1.p|PACid:30205664	Pavir.Ca02597.1.p|PACid:30205664	8721	83285	467	467	38	38	47.9	5.13	122153	1	1	0	713.932	1425.85	2	1425.85	-0.0022	0	93.14		28	1.8e-08	K	DAGVIAGLNVLR	I
2	Pavir.Ca02597.1.p|PACid:30205664	Pavir.Ca02597.1.p|PACid:30205664	8721	83285	467	467	38	38	47.9	5.13	122157	1	1	0	713.932	1425.85	2	1425.85	-0.002	0	67.36	27	28	5.5e-06	K	DAGVIAGLNVLR	I
2	Pavir.Ca02597.1.p|PACid:30205664	Pavir.Ca02597.1.p|PACid:30205664	8721	83285	467	467	38	38	47.9	5.13	122158	1	1	0	713.932	1425.85	2	1425.85	-0.002	0	53.36	27	28	0.00014	K	DAGVIAGLNVLR	I
2	Pavir.Ca02597.1.p|PACid:30205664	Pavir.Ca02597.1.p|PACid:30205664	8721	83285	467	467	38	38	47.9	5.13	122159	1	1	0	476.29	1425.85	3	1425.85	-0.002	0	59.88		28	3.7e-05	K	DAGVIAGLNVLR	I
2	Pavir.Ca02597.1.p|PACid:30205664	Pavir.Ca02597.1.p|PACid:30205664	8721	83285	467	467	38	38	47.9	5.13	122161	1	1	0	713.932	1425.85	2	1425.85	-0.0019	0	45.36	23	28	0.00035	K	DAGVIAGLNVLR	I
2	Pavir.Ca02597.1.p|PACid:30205664	Pavir.Ca02597.1.p|PACid:30205664	8721	83285	467	467	38	38	47.9	5.13	122162	1	1	0	713.932	1425.85	2	1425.85	-0.0019	0	72.31		28	2.1e-06	K	DAGVIAGLNVLR	I
2	Pavir.Ca02597.1.p|PACid:30205664	Pavir.Ca02597.1.p|PACid:30205664	8721	83285	467	467	38	38	47.9	5.13	122164	1	1	0	713.932	1425.85	2	1425.85	-0.0019	0	81.07		28	2.8e-07	K	DAGVIAGLNVLR	I
2	Pavir.Ca02597.1.p|PACid:30205664	Pavir.Ca02597.1.p|PACid:30205664	8721	83285	467	467	38	38	47.9	5.13	122166	1	1	0	713.932	1425.85	2	1425.85	-0.0018	0	45.11	21	28	0.0002	K	DAGVIAGLNVLR	I
2	Pavir.Ca02597.1.p|PACid:30205664	Pavir.Ca02597.1.p|PACid:30205664	8721	83285	467	467	38	38	47.9	5.13	122167	1	1	0	476.29	1425.85	3	1425.85	-0.0017	0	31.14	24	28	0.011	K	DAGVIAGLNVLR	I
2	Pavir.Ca02597.1.p|PACid:30205664	Pavir.Ca02597.1.p|PACid:30205664	8721	83285	467	467	38	38	47.9	5.13	122168	1	1	0	476.29	1425.85	3	1425.85	-0.0017	0	66.15		28	8.2e-06	K	DAGVIAGLNVLR	I
2	Pavir.Ca02597.1.p|PACid:30205664	Pavir.Ca02597.1.p|PACid:30205664	8721	83285	467	467	38	38	47.9	5.13	122170	1	1	0	713.932	1425.85	2	1425.85	-0.0017	0	74.39		28	1.2e-06	K	DAGVIAGLNVLR	I
2	Pavir.Ca02597.1.p|PACid:30205664	Pavir.Ca02597.1.p|PACid:30205664	8721	83285	467	467	38	38	47.9	5.13	122176	1	1	0	713.932	1425.85	2	1425.85	-0.0016	0	79.39		28	3.9e-07	K	DAGVIAGLNVLR	I
2	Pavir.Ca02597.1.p|PACid:30205664	Pavir.Ca02597.1.p|PACid:30205664	8721	83285	467	467	38	38	47.9	5.13	122177	1	1	0	476.29	1425.85	3	1425.85	-0.0015	0	41.45		28	0.0024	K	DAGVIAGLNVLR	I
2	Pavir.Ca02597.1.p|PACid:30205664	Pavir.Ca02597.1.p|PACid:30205664	8721	83285	467	467	38	38	47.9	5.13	122180	1	1	0	476.29	1425.85	3	1425.85	-0.0013	0	57.23		28	6.4e-05	K	DAGVIAGLNVLR	I
2	Pavir.Ca02597.1.p|PACid:30205664	Pavir.Ca02597.1.p|PACid:30205664	8721	83285	467	467	38	38	47.9	5.13	122185	1	1	0	713.932	1425.85	2	1425.85	-0.0011	0	90.12		28	3.3e-08	K	DAGVIAGLNVLR	I
2	Pavir.Ca02597.1.p|PACid:30205664	Pavir.Ca02597.1.p|PACid:30205664	8721	83285	467	467	38	38	47.9	5.13	122188	1	1	0	713.932	1425.85	2	1425.85	-0.0006	0	26.62	23	28	0.026	K	DAGVIAGLNVLR	I
2	Pavir.Ca02597.1.p|PACid:30205664	Pavir.Ca02597.1.p|PACid:30205664	8721	83285	467	467	38	38	47.9	5.13	122189	1	1	0	713.932	1425.85	2	1425.85	-0.0005	0	78.28		28	5.1e-07	K	DAGVIAGLNVLR	I
2	Pavir.Ca02597.1.p|PACid:30205664	Pavir.Ca02597.1.p|PACid:30205664	8721	83285	467	467	38	38	47.9	5.13	122193	1	1	0	476.291	1425.85	3	1425.85	0.0001	0	60.62		28	3e-05	K	DAGVIAGLNVLR	I
2	Pavir.Ca02597.1.p|PACid:30205664	Pavir.Ca02597.1.p|PACid:30205664	8721	83285	467	467	38	38	47.9	5.13	122476	1	1	0	476.618	1426.83	3	1426.83	-0.0034	0	49.67		28	0.00043	K	DAGVIAGLNVLR	I	Deamidated (NQ)	0.000000002000.0
2	Pavir.Ca02597.1.p|PACid:30205664	Pavir.Ca02597.1.p|PACid:30205664	8721	83285	467	467	38	38	47.9	5.13	122478	1	1	0	714.423	1426.83	2	1426.83	-0.0026	0	39.36	24	29	0.0018	K	DAGVIAGLNVLR	I	Deamidated (NQ)	0.000000002000.0
2	Pavir.Ca02597.1.p|PACid:30205664	Pavir.Ca02597.1.p|PACid:30205664	8721	83285	467	467	38	38	47.9	5.13	122480	1	1	0	476.618	1426.83	3	1426.83	-0.0021	0	47.07		29	0.00087	K	DAGVIAGLNVLR	I	Deamidated (NQ)	0.000000002000.0
2	Pavir.Ca02597.1.p|PACid:30205664	Pavir.Ca02597.1.p|PACid:30205664	8721	83285	467	467	38	38	47.9	5.13	129740	1	1	0	724.456	1446.9	2	1446.9	-0.0035	1	25.94	24	30	0.039	K	LAADDKK	K
2	Pavir.Ca02597.1.p|PACid:30205664	Pavir.Ca02597.1.p|PACid:30205664	8721	83285	467	467	38	38	47.9	5.13	129769	1	1	0	724.457	1446.9	2	1446.9	-0.0028	1	24.86	23	31	0.034	K	LAADDKK	K
2	Pavir.Ca02597.1.p|PACid:30205664	Pavir.Ca02597.1.p|PACid:30205664	8721	83285	467	467	38	38	47.9	5.13	129813	1	1	0	724.458	1446.9	2	1446.9	-0.0008	1	27.73	24	30	0.023	K	LAADDKK	K
2	Pavir.Ca02597.1.p|PACid:30205664	Pavir.Ca02597.1.p|PACid:30205664	8721	83285	467	467	38	38	47.9	5.13	132745	1	1	0	486.601	1456.78	3	1456.78	-0.0027	0	52.57		29	0.00024	R	VEIIANDQGNR	T
2	Pavir.Ca02597.1.p|PACid:30205664	Pavir.Ca02597.1.p|PACid:30205664	8721	83285	467	467	38	38	47.9	5.13	132746	1	1	0	729.398	1456.78	2	1456.78	-0.0023	0	51.02	25	29	0.00016	R	VEIIANDQGNR	T
2	Pavir.Ca02597.1.p|PACid:30205664	Pavir.Ca02597.1.p|PACid:30205664	8721	83285	467	467	38	38	47.9	5.13	132750	1	1	0	729.398	1456.78	2	1456.78	-0.0018	0	37.08	18	29	0.00069	R	VEIIANDQGNR	T
2	Pavir.Ca02597.1.p|PACid:30205664	Pavir.Ca02597.1.p|PACid:30205664	8721	83285	467	467	38	38	47.9	5.13	132753	1	1	0	729.399	1456.78	2	1456.78	-0.0012	0	43.12	23	29	0.00058	R	VEIIANDQGNR	T
2	Pavir.Ca02597.1.p|PACid:30205664	Pavir.Ca02597.1.p|PACid:30205664	8721	83285	467	467	38	38	47.9	5.13	133003	1	1	0	729.889	1457.76	2	1457.77	-0.0039	0	62.28		28	2.2e-05	R	VEIIANDQGNR	T	Deamidated (NQ)	0.00000000020.0
2	Pavir.Ca02597.1.p|PACid:30205664	Pavir.Ca02597.1.p|PACid:30205664	8721	83285	467	467	38	38	47.9	5.13	133006	1	1	0	729.89	1457.77	2	1457.77	-0.0025	0	52.53	28	28	0.00019	R	VEIIANDQGNR	T	Deamidated (NQ)	0.00000200000.0
2	Pavir.Ca02597.1.p|PACid:30205664	Pavir.Ca02597.1.p|PACid:30205664	8721	83285	467	467	38	38	47.9	5.13	133007	1	1	0	729.89	1457.77	2	1457.77	-0.0021	0	43.37		28	0.0018	R	VEIIANDQGNR	T	Deamidated (NQ)	0.00000000020.0
2	Pavir.Ca02597.1.p|PACid:30205664	Pavir.Ca02597.1.p|PACid:30205664	8721	83285	467	467	38	38	47.9	5.13	133008	1	1	0	729.89	1457.77	2	1457.77	-0.0021	0	69.25	27	28	3.1e-06	R	VEIIANDQGNR	T	Deamidated (NQ)	0.00000200000.0
2	Pavir.Ca02597.1.p|PACid:30205664	Pavir.Ca02597.1.p|PACid:30205664	8721	83285	467	467	38	38	47.9	5.13	133011	1	1	0	729.89	1457.77	2	1457.77	-0.0014	0	30.94	23	29	0.01	R	VEIIANDQGNR	T	Deamidated (NQ)	0.00000000020.0
2	Pavir.Ca02597.1.p|PACid:30205664	Pavir.Ca02597.1.p|PACid:30205664	8721	83285	467	467	38	38	47.9	5.13	139312	1	1	0	492.964	1475.87	3	1475.87	-0.0027	1	17.01	16	30	0.049	K	ITITNDKGR	L	Deamidated (NQ)	0.000020000.0
2	Pavir.Ca02597.1.p|PACid:30205664	Pavir.Ca02597.1.p|PACid:30205664	8721	83285	467	467	38	38	47.9	5.13	139313	1	1	0	738.942	1475.87	2	1475.87	-0.0027	1	31.98	21	30	0.0048	K	ITITNDKGR	L	Deamidated (NQ)	0.000020000.0
2	Pavir.Ca02597.1.p|PACid:30205664	Pavir.Ca02597.1.p|PACid:30205664	8721	83285	467	467	38	38	47.9	5.13	139318	1	1	0	492.964	1475.87	3	1475.87	-0.0024	1	17.9	16	30	0.035	K	ITITNDKGR	L	Deamidated (NQ)	0.000020000.0
2	Pavir.Ca02597.1.p|PACid:30205664	Pavir.Ca02597.1.p|PACid:30205664	8721	83285	467	467	38	38	47.9	5.13	139319	1	1	0	492.964	1475.87	3	1475.87	-0.0024	1	20.59	20	30	0.044	K	ITITNDKGR	L	Deamidated (NQ)	0.000020000.0
2	Pavir.Ca02597.1.p|PACid:30205664	Pavir.Ca02597.1.p|PACid:30205664	8721	83285	467	467	38	38	47.9	5.13	139326	1	1	0	738.942	1475.87	2	1475.87	-0.002	1	19.46	15	30	0.02	K	ITITNDKGR	L	Deamidated (NQ)	0.000020000.0
2	Pavir.Ca02597.1.p|PACid:30205664	Pavir.Ca02597.1.p|PACid:30205664	8721	83285	467	467	38	38	47.9	5.13	143354	1	1	0	496.967	1487.88	3	1487.88	-0.0024	1	20.71	14	30	0.011	R	TRDNNLLGK	F
2	Pavir.Ca02597.1.p|PACid:30205664	Pavir.Ca02597.1.p|PACid:30205664	8721	83285	467	467	38	38	47.9	5.13	143692	1	1	0	497.296	1488.86	3	1488.87	-0.0019	1	25.37	24	31	0.042	R	TRDNNLLGK	F	Deamidated (NQ)	0.000200000.0
2	Pavir.Ca02597.1.p|PACid:30205664	Pavir.Ca02597.1.p|PACid:30205664	8721	83285	467	467	38	38	47.9	5.13	149794	1	1	0	753.974	1505.93	2	1505.94	-0.0046	1	25.64	22	29	0.025	K	KATSVGEK	N
2	Pavir.Ca02597.1.p|PACid:30205664	Pavir.Ca02597.1.p|PACid:30205664	8721	83285	467	467	38	38	47.9	5.13	167229	1	1	0	779.89	1557.77	2	1557.77	-0.0039	0	28.92	14	27	0.0019	R	FEELNMDLFR	K	Oxidation (M)	0.0000010000.0
2	Pavir.Ca02597.1.p|PACid:30205664	Pavir.Ca02597.1.p|PACid:30205664	8721	83285	467	467	38	38	47.9	5.13	167230	1	1	0	779.891	1557.77	2	1557.77	-0.0033	0	33.32	19	27	0.0022	R	FEELNMDLFR	K	Oxidation (M)	0.0000010000.0
2	Pavir.Ca02597.1.p|PACid:30205664	Pavir.Ca02597.1.p|PACid:30205664	8721	83285	467	467	38	38	47.9	5.13	167231	1	1	0	779.891	1557.77	2	1557.77	-0.0028	0	22.97	14	27	0.007	R	FEELNMDLFR	K	Oxidation (M)	0.0000010000.0
2	Pavir.Ca02597.1.p|PACid:30205664	Pavir.Ca02597.1.p|PACid:30205664	8721	83285	467	467	38	38	47.9	5.13	167232	1	1	0	779.891	1557.77	2	1557.77	-0.0025	0	49.48	16	27	2.3e-05	R	FEELNMDLFR	K	Oxidation (M)	0.0000010000.0
2	Pavir.Ca02597.1.p|PACid:30205664	Pavir.Ca02597.1.p|PACid:30205664	8721	83285	467	467	38	38	47.9	5.13	167234	1	1	0	779.891	1557.77	2	1557.77	-0.0017	0	26.79	14	27	0.0031	R	FEELNMDLFR	K	Oxidation (M)	0.0000010000.0
2	Pavir.Ca02597.1.p|PACid:30205664	Pavir.Ca02597.1.p|PACid:30205664	8721	83285	467	467	38	38	47.9	5.13	178903	1	1	0	795.512	1589.01	2	1589.01	-0.0034	1	24.35	14	27	0.0052	R	NTTIPTKK	E
2	Pavir.Ca02597.1.p|PACid:30205664	Pavir.Ca02597.1.p|PACid:30205664	8721	83285	467	467	38	38	47.9	5.13	178947	1	1	0	795.513	1589.01	2	1589.01	-0.0004	1	40.34	21	27	0.00067	R	NTTIPTKK	E
2	Pavir.Ca02597.1.p|PACid:30205664	Pavir.Ca02597.1.p|PACid:30205664	8721	83285	467	467	38	38	47.9	5.13	184050	1	1	0	802.389	1602.76	2	1602.77	-0.0031	0	74.95	17	25	9.4e-08	K	NSLENYAYNMR	N
2	Pavir.Ca02597.1.p|PACid:30205664	Pavir.Ca02597.1.p|PACid:30205664	8721	83285	467	467	38	38	47.9	5.13	184051	1	1	0	802.389	1602.76	2	1602.77	-0.0029	0	62.59	16	25	1.4e-06	K	NSLENYAYNMR	N
2	Pavir.Ca02597.1.p|PACid:30205664	Pavir.Ca02597.1.p|PACid:30205664	8721	83285	467	467	38	38	47.9	5.13	184054	1	1	0	802.389	1602.76	2	1602.77	-0.0025	0	37.33	18	25	0.00059	K	NSLENYAYNMR	N
2	Pavir.Ca02597.1.p|PACid:30205664	Pavir.Ca02597.1.p|PACid:30205664	8721	83285	467	467	38	38	47.9	5.13	184056	1	1	0	802.389	1602.76	2	1602.77	-0.0024	0	32.94	15	25	0.00081	K	NSLENYAYNMR	N
2	Pavir.Ca02597.1.p|PACid:30205664	Pavir.Ca02597.1.p|PACid:30205664	8721	83285	467	467	38	38	47.9	5.13	184060	1	1	0	535.262	1602.76	3	1602.77	-0.0015	0	48.33	16	25	2.9e-05	K	NSLENYAYNMR	N
2	Pavir.Ca02597.1.p|PACid:30205664	Pavir.Ca02597.1.p|PACid:30205664	8721	83285	467	467	38	38	47.9	5.13	184061	1	1	0	535.262	1602.77	3	1602.77	-0.0011	0	50.22	16	25	2.1e-05	K	NSLENYAYNMR	N
2	Pavir.Ca02597.1.p|PACid:30205664	Pavir.Ca02597.1.p|PACid:30205664	8721	83285	467	467	38	38	47.9	5.13	184372	1	1	0	802.881	1603.75	2	1603.75	-0.0024	0	36.52	15	23	0.00038	K	NSLENYAYNMR	N	Deamidated (NQ)	0.20000000000.0
2	Pavir.Ca02597.1.p|PACid:30205664	Pavir.Ca02597.1.p|PACid:30205664	8721	83285	467	467	38	38	47.9	5.13	184374	1	1	0	802.882	1603.75	2	1603.75	-0.0017	0	25.72	17	23	0.007	K	NSLENYAYNMR	N	Deamidated (NQ)	0.00002000000.0
2	Pavir.Ca02597.1.p|PACid:30205664	Pavir.Ca02597.1.p|PACid:30205664	8721	83285	467	467	38	38	47.9	5.13	184376	1	1	0	802.882	1603.75	2	1603.75	-0.001	0	32.98	15	24	0.00081	K	NSLENYAYNMR	N	Deamidated (NQ)	0.00002000000.0
2	Pavir.Ca02597.1.p|PACid:30205664	Pavir.Ca02597.1.p|PACid:30205664	8721	83285	467	467	38	38	47.9	5.13	189709	1	1	0	810.386	1618.76	2	1618.76	-0.0045	0	27.05		24	0.031	K	NSLENYAYNMR	N	Oxidation (M)	0.00000000010.0
2	Pavir.Ca02597.1.p|PACid:30205664	Pavir.Ca02597.1.p|PACid:30205664	8721	83285	467	467	38	38	47.9	5.13	189711	1	1	0	810.386	1618.76	2	1618.76	-0.0033	0	46.2		24	0.00038	K	NSLENYAYNMR	N	Oxidation (M)	0.00000000010.0
2	Pavir.Ca02597.1.p|PACid:30205664	Pavir.Ca02597.1.p|PACid:30205664	8721	83285	467	467	38	38	47.9	5.13	189713	1	1	0	810.386	1618.76	2	1618.76	-0.0029	0	53.89		24	6.4e-05	K	NSLENYAYNMR	N	Oxidation (M)	0.00000000010.0
2	Pavir.Ca02597.1.p|PACid:30205664	Pavir.Ca02597.1.p|PACid:30205664	8721	83285	467	467	38	38	47.9	5.13	189714	1	1	0	810.387	1618.76	2	1618.76	-0.0026	0	56.08		24	3.9e-05	K	NSLENYAYNMR	N	Oxidation (M)	0.00000000010.0
2	Pavir.Ca02597.1.p|PACid:30205664	Pavir.Ca02597.1.p|PACid:30205664	8721	83285	467	467	38	38	47.9	5.13	189715	1	1	0	810.387	1618.76	2	1618.76	-0.0026	0	45.4		24	0.00045	K	NSLENYAYNMR	N	Oxidation (M)	0.00000000010.0
2	Pavir.Ca02597.1.p|PACid:30205664	Pavir.Ca02597.1.p|PACid:30205664	8721	83285	467	467	38	38	47.9	5.13	189716	1	1	0	810.387	1618.76	2	1618.76	-0.0026	0	54		24	6.3e-05	K	NSLENYAYNMR	N	Oxidation (M)	0.00000000010.0
2	Pavir.Ca02597.1.p|PACid:30205664	Pavir.Ca02597.1.p|PACid:30205664	8721	83285	467	467	38	38	47.9	5.13	189717	1	1	0	810.387	1618.76	2	1618.76	-0.0024	0	41.12		25	0.0012	K	NSLENYAYNMR	N	Oxidation (M)	0.00000000010.0
2	Pavir.Ca02597.1.p|PACid:30205664	Pavir.Ca02597.1.p|PACid:30205664	8721	83285	467	467	38	38	47.9	5.13	189718	1	1	0	810.387	1618.76	2	1618.76	-0.0024	0	53.99		25	6.3e-05	K	NSLENYAYNMR	N	Oxidation (M)	0.00000000010.0
2	Pavir.Ca02597.1.p|PACid:30205664	Pavir.Ca02597.1.p|PACid:30205664	8721	83285	467	467	38	38	47.9	5.13	189719	1	1	0	540.594	1618.76	3	1618.76	-0.0023	0	33.62		25	0.007	K	NSLENYAYNMR	N	Oxidation (M)	0.00000000010.0
2	Pavir.Ca02597.1.p|PACid:30205664	Pavir.Ca02597.1.p|PACid:30205664	8721	83285	467	467	38	38	47.9	5.13	189720	1	1	0	810.387	1618.76	2	1618.76	-0.0021	0	31.65	18	25	0.0024	K	NSLENYAYNMR	N	Oxidation (M)	0.00000000010.0
2	Pavir.Ca02597.1.p|PACid:30205664	Pavir.Ca02597.1.p|PACid:30205664	8721	83285	467	467	38	38	47.9	5.13	189721	1	1	0	540.594	1618.76	3	1618.76	-0.0016	0	45.64		25	0.00044	K	NSLENYAYNMR	N	Oxidation (M)	0.00000000010.0
2	Pavir.Ca02597.1.p|PACid:30205664	Pavir.Ca02597.1.p|PACid:30205664	8721	83285	467	467	38	38	47.9	5.13	189725	2	1	0	810.387	1618.76	2	1618.76	-0.0012	0	28.43		25	0.024	K	NSLENYAYNMR	N	Oxidation (M)	0.00000000010.0
2	Pavir.Ca02597.1.p|PACid:30205664	Pavir.Ca02597.1.p|PACid:30205664	8721	83285	467	467	38	38	47.9	5.13	189726	1	1	0	810.387	1618.76	2	1618.76	-0.0012	0	39.61	21	25	0.0007	K	NSLENYAYNMR	N	Oxidation (M)	0.00000000010.0
2	Pavir.Ca02597.1.p|PACid:30205664	Pavir.Ca02597.1.p|PACid:30205664	8721	83285	467	467	38	38	47.9	5.13	189727	1	1	0	540.594	1618.76	3	1618.76	-0.0009	0	34.89		25	0.0055	K	NSLENYAYNMR	N	Oxidation (M)	0.00000000010.0
2	Pavir.Ca02597.1.p|PACid:30205664	Pavir.Ca02597.1.p|PACid:30205664	8721	83285	467	467	38	38	47.9	5.13	189728	1	1	0	810.388	1618.76	2	1618.76	-0.0004	0	32.05	20	25	0.0034	K	NSLENYAYNMR	N	Oxidation (M)	0.00000000010.0
2	Pavir.Ca02597.1.p|PACid:30205664	Pavir.Ca02597.1.p|PACid:30205664	8721	83285	467	467	38	38	47.9	5.13	189729	1	1	0	810.388	1618.76	2	1618.76	-0.0001	0	19.1	14	25	0.016	K	NSLENYAYNMR	N	Oxidation (M)	0.00000000010.0
2	Pavir.Ca02597.1.p|PACid:30205664	Pavir.Ca02597.1.p|PACid:30205664	8721	83285	467	467	38	38	47.9	5.13	190206	1	1	0	810.878	1619.74	2	1619.75	-0.0039	0	40.48	20	23	0.00053	K	NSLENYAYNMR	N	Oxidation (M); Deamidated (NQ)	0.20000000010.0
2	Pavir.Ca02597.1.p|PACid:30205664	Pavir.Ca02597.1.p|PACid:30205664	8721	83285	467	467	38	38	47.9	5.13	190210	1	1	0	810.879	1619.74	2	1619.75	-0.0026	0	45.34		23	0.00036	K	NSLENYAYNMR	N	Oxidation (M); Deamidated (NQ)	0.00000000210.0
2	Pavir.Ca02597.1.p|PACid:30205664	Pavir.Ca02597.1.p|PACid:30205664	8721	83285	467	467	38	38	47.9	5.13	190211	1	1	0	810.879	1619.74	2	1619.75	-0.0026	0	32.78	20	23	0.0031	K	NSLENYAYNMR	N	Oxidation (M); Deamidated (NQ)	0.20000000010.0
2	Pavir.Ca02597.1.p|PACid:30205664	Pavir.Ca02597.1.p|PACid:30205664	8721	83285	467	467	38	38	47.9	5.13	190214	1	1	0	810.879	1619.74	2	1619.75	-0.0021	0	48.94		23	0.00016	K	NSLENYAYNMR	N	Oxidation (M); Deamidated (NQ)	0.20000000010.0
2	Pavir.Ca02597.1.p|PACid:30205664	Pavir.Ca02597.1.p|PACid:30205664	8721	83285	467	467	38	38	47.9	5.13	190215	1	1	0	810.879	1619.74	2	1619.75	-0.0018	0	42.06		23	0.00078	K	NSLENYAYNMR	N	Oxidation (M); Deamidated (NQ)	0.20000000010.0
2	Pavir.Ca02597.1.p|PACid:30205664	Pavir.Ca02597.1.p|PACid:30205664	8721	83285	467	467	38	38	47.9	5.13	190216	1	1	0	810.879	1619.74	2	1619.75	-0.0017	0	27.41	19	23	0.0075	K	NSLENYAYNMR	N	Oxidation (M); Deamidated (NQ)	0.00000000210.0
2	Pavir.Ca02597.1.p|PACid:30205664	Pavir.Ca02597.1.p|PACid:30205664	8721	83285	467	467	38	38	47.9	5.13	190217	1	1	0	810.879	1619.74	2	1619.75	-0.0017	0	56.06		23	3.1e-05	K	NSLENYAYNMR	N	Oxidation (M); Deamidated (NQ)	0.00000000210.0
2	Pavir.Ca02597.1.p|PACid:30205664	Pavir.Ca02597.1.p|PACid:30205664	8721	83285	467	467	38	38	47.9	5.13	190218	1	1	0	810.879	1619.74	2	1619.75	-0.0013	0	25.54	18	24	0.0099	K	NSLENYAYNMR	N	Oxidation (M); Deamidated (NQ)	0.20000000010.0
2	Pavir.Ca02597.1.p|PACid:30205664	Pavir.Ca02597.1.p|PACid:30205664	8721	83285	467	467	38	38	47.9	5.13	190221	1	1	0	810.88	1619.75	2	1619.75	0.0011	0	52.39		24	7.4e-05	K	NSLENYAYNMR	N	Oxidation (M); Deamidated (NQ)	0.00000000210.0
2	Pavir.Ca02597.1.p|PACid:30205664	Pavir.Ca02597.1.p|PACid:30205664	8721	83285	467	467	38	38	47.9	5.13	198744	1	1	0	821.457	1640.9	2	1640.9	-0.0047	0	73.44	20	29	2.4e-07	K	SSVHDVVLVGGSTR	I
2	Pavir.Ca02597.1.p|PACid:30205664	Pavir.Ca02597.1.p|PACid:30205664	8721	83285	467	467	38	38	47.9	5.13	198747	1	1	0	547.974	1640.9	3	1640.9	-0.0037	0	51.33	25	29	0.00012	K	SSVHDVVLVGGSTR	I
2	Pavir.Ca02597.1.p|PACid:30205664	Pavir.Ca02597.1.p|PACid:30205664	8721	83285	467	467	38	38	47.9	5.13	198749	1	1	0	547.975	1640.9	3	1640.9	-0.0033	0	38.15	15	29	0.00026	K	SSVHDVVLVGGSTR	I
2	Pavir.Ca02597.1.p|PACid:30205664	Pavir.Ca02597.1.p|PACid:30205664	8721	83285	467	467	38	38	47.9	5.13	206980	1	1	0	832.014	1662.01	2	1662.02	-0.0029	1	31.91		29	0.03	R	LSKEEIEK	M
2	Pavir.Ca02597.1.p|PACid:30205664	Pavir.Ca02597.1.p|PACid:30205664	8721	83285	467	467	38	38	47.9	5.13	209621	1	1	0	834.963	1667.91	2	1667.91	-0.0021	0	43.79	16	30	8.4e-05	R	FTDASVQSDIK	L
2	Pavir.Ca02597.1.p|PACid:30205664	Pavir.Ca02597.1.p|PACid:30205664	8721	83285	467	467	38	38	47.9	5.13	209626	1	1	0	834.964	1667.91	2	1667.91	-0.0002	0	47.01	23	30	0.00023	R	FTDASVQSDIK	L
2	Pavir.Ca02597.1.p|PACid:30205664	Pavir.Ca02597.1.p|PACid:30205664	8721	83285	467	467	38	38	47.9	5.13	221247	1	1	0	566.317	1695.93	3	1695.93	-0.0031	1	15.51	13	30	0.035	R	KCMEPVEK	C
2	Pavir.Ca02597.1.p|PACid:30205664	Pavir.Ca02597.1.p|PACid:30205664	8721	83285	467	467	38	38	47.9	5.13	221251	1	1	0	566.318	1695.93	3	1695.93	-0.002	1	14.65	13	30	0.042	R	KCMEPVEK	C
2	Pavir.Ca02597.1.p|PACid:30205664	Pavir.Ca02597.1.p|PACid:30205664	8721	83285	467	467	38	38	47.9	5.13	223421	1	1	0	568.285	1701.83	3	1701.84	-0.0069	0	20.01	16	26	0.023	R	TTPSYVAFTDSER	L
2	Pavir.Ca02597.1.p|PACid:30205664	Pavir.Ca02597.1.p|PACid:30205664	8721	83285	467	467	38	38	47.9	5.13	223425	1	1	0	851.926	1701.84	2	1701.84	-0.0039	0	46.62	21	26	0.00014	R	TTPSYVAFTDSER	L
2	Pavir.Ca02597.1.p|PACid:30205664	Pavir.Ca02597.1.p|PACid:30205664	8721	83285	467	467	38	38	47.9	5.13	223427	1	1	0	851.926	1701.84	2	1701.84	-0.0033	0	68.06	23	26	1.9e-06	R	TTPSYVAFTDSER	L
2	Pavir.Ca02597.1.p|PACid:30205664	Pavir.Ca02597.1.p|PACid:30205664	8721	83285	467	467	38	38	47.9	5.13	223428	1	1	0	851.926	1701.84	2	1701.84	-0.0031	0	34.84	20	26	0.0017	R	TTPSYVAFTDSER	L
2	Pavir.Ca02597.1.p|PACid:30205664	Pavir.Ca02597.1.p|PACid:30205664	8721	83285	467	467	38	38	47.9	5.13	223429	1	1	0	851.927	1701.84	2	1701.84	-0.0028	0	72.51	24	26	7.8e-07	R	TTPSYVAFTDSER	L
2	Pavir.Ca02597.1.p|PACid:30205664	Pavir.Ca02597.1.p|PACid:30205664	8721	83285	467	467	38	38	47.9	5.13	223431	1	1	0	568.287	1701.84	3	1701.84	-0.0025	0	52.82	16	26	1.1e-05	R	TTPSYVAFTDSER	L
2	Pavir.Ca02597.1.p|PACid:30205664	Pavir.Ca02597.1.p|PACid:30205664	8721	83285	467	467	38	38	47.9	5.13	223433	1	1	0	851.927	1701.84	2	1701.84	-0.0024	0	62.25	22	26	5.2e-06	R	TTPSYVAFTDSER	L
2	Pavir.Ca02597.1.p|PACid:30205664	Pavir.Ca02597.1.p|PACid:30205664	8721	83285	467	467	38	38	47.9	5.13	223435	1	1	0	568.287	1701.84	3	1701.84	-0.0023	0	30.5	16	27	0.0018	R	TTPSYVAFTDSER	L
2	Pavir.Ca02597.1.p|PACid:30205664	Pavir.Ca02597.1.p|PACid:30205664	8721	83285	467	467	38	38	47.9	5.13	223437	1	1	0	851.927	1701.84	2	1701.84	-0.0018	0	45.92	22	26	0.00022	R	TTPSYVAFTDSER	L
2	Pavir.Ca02597.1.p|PACid:30205664	Pavir.Ca02597.1.p|PACid:30205664	8721	83285	467	467	38	38	47.9	5.13	227478	1	1	0	571.648	1711.92	3	1711.93	-0.0057	1	20.67	15	30	0.015	R	KCMEPVEK	C	Oxidation (M)	0.00100000.0
2	Pavir.Ca02597.1.p|PACid:30205664	Pavir.Ca02597.1.p|PACid:30205664	8721	83285	467	467	38	38	47.9	5.13	227485	1	1	0	571.649	1711.92	3	1711.93	-0.0039	1	15.54	13	30	0.035	R	KCMEPVEK	C	Oxidation (M)	0.00100000.0
2	Pavir.Ca02597.1.p|PACid:30205664	Pavir.Ca02597.1.p|PACid:30205664	8721	83285	467	467	38	38	47.9	5.13	235828	1	1	0	867.538	1733.06	2	1733.07	-0.0033	1	29.1	16	28	0.0026	K	NKITITNDK	G
2	Pavir.Ca02597.1.p|PACid:30205664	Pavir.Ca02597.1.p|PACid:30205664	8721	83285	467	467	38	38	47.9	5.13	235831	1	1	0	578.695	1733.06	3	1733.07	-0.0025	1	18.38	14	28	0.02	K	NKITITNDK	G
2	Pavir.Ca02597.1.p|PACid:30205664	Pavir.Ca02597.1.p|PACid:30205664	8721	83285	467	467	38	38	47.9	5.13	236828	1	1	0	579.655	1735.94	3	1735.95	-0.0058	0	18.46	14	30	0.019	R	MVNHFVQEFK	R
2	Pavir.Ca02597.1.p|PACid:30205664	Pavir.Ca02597.1.p|PACid:30205664	8721	83285	467	467	38	38	47.9	5.13	236835	1	1	0	579.655	1735.94	3	1735.95	-0.0044	0	31.35	14	30	0.0011	R	MVNHFVQEFK	R
2	Pavir.Ca02597.1.p|PACid:30205664	Pavir.Ca02597.1.p|PACid:30205664	8721	83285	467	467	38	38	47.9	5.13	236837	1	1	0	868.98	1735.94	2	1735.95	-0.0039	0	36.11	15	30	0.00041	R	MVNHFVQEFK	R
2	Pavir.Ca02597.1.p|PACid:30205664	Pavir.Ca02597.1.p|PACid:30205664	8721	83285	467	467	38	38	47.9	5.13	236838	1	1	0	579.656	1735.94	3	1735.95	-0.0036	0	25.08	14	31	0.0044	R	MVNHFVQEFK	R
2	Pavir.Ca02597.1.p|PACid:30205664	Pavir.Ca02597.1.p|PACid:30205664	8721	83285	467	467	38	38	47.9	5.13	236841	1	1	0	579.656	1735.95	3	1735.95	-0.0031	0	44.77	20	31	0.00018	R	MVNHFVQEFK	R
2	Pavir.Ca02597.1.p|PACid:30205664	Pavir.Ca02597.1.p|PACid:30205664	8721	83285	467	467	38	38	47.9	5.13	236842	1	1	0	434.994	1735.95	4	1735.95	-0.0029	0	22.42	14	30	0.008	R	MVNHFVQEFK	R
2	Pavir.Ca02597.1.p|PACid:30205664	Pavir.Ca02597.1.p|PACid:30205664	8721	83285	467	467	38	38	47.9	5.13	236844	1	1	0	868.98	1735.95	2	1735.95	-0.0029	0	62.68	21	30	3.9e-06	R	MVNHFVQEFK	R
2	Pavir.Ca02597.1.p|PACid:30205664	Pavir.Ca02597.1.p|PACid:30205664	8721	83285	467	467	38	38	47.9	5.13	236846	1	1	0	579.656	1735.95	3	1735.95	-0.0026	0	25.75	14	31	0.0038	R	MVNHFVQEFK	R
2	Pavir.Ca02597.1.p|PACid:30205664	Pavir.Ca02597.1.p|PACid:30205664	8721	83285	467	467	38	38	47.9	5.13	236847	1	1	0	579.656	1735.95	3	1735.95	-0.0022	0	17.41	14	31	0.023	R	MVNHFVQEFK	R
2	Pavir.Ca02597.1.p|PACid:30205664	Pavir.Ca02597.1.p|PACid:30205664	8721	83285	467	467	38	38	47.9	5.13	236851	1	1	0	579.656	1735.95	3	1735.95	-0.002	0	44.61	20	31	0.00019	R	MVNHFVQEFK	R
2	Pavir.Ca02597.1.p|PACid:30205664	Pavir.Ca02597.1.p|PACid:30205664	8721	83285	467	467	38	38	47.9	5.13	236852	1	1	0	579.656	1735.95	3	1735.95	-0.0018	0	21.31	14	30	0.01	R	MVNHFVQEFK	R
2	Pavir.Ca02597.1.p|PACid:30205664	Pavir.Ca02597.1.p|PACid:30205664	8721	83285	467	467	38	38	47.9	5.13	236853	1	1	0	579.656	1735.95	3	1735.95	-0.0014	0	47.94	21	30	0.00011	R	MVNHFVQEFK	R
2	Pavir.Ca02597.1.p|PACid:30205664	Pavir.Ca02597.1.p|PACid:30205664	8721	83285	467	467	38	38	47.9	5.13	236855	1	1	0	868.981	1735.95	2	1735.95	-0.0009	0	43.98	19	30	0.00018	R	MVNHFVQEFK	R
2	Pavir.Ca02597.1.p|PACid:30205664	Pavir.Ca02597.1.p|PACid:30205664	8721	83285	467	467	38	38	47.9	5.13	236856	1	1	0	579.657	1735.95	3	1735.95	-0.0009	0	15.82	14	30	0.041	R	MVNHFVQEFK	R
2	Pavir.Ca02597.1.p|PACid:30205664	Pavir.Ca02597.1.p|PACid:30205664	8721	83285	467	467	38	38	47.9	5.13	236860	1	1	0	579.657	1735.95	3	1735.95	-0.0003	0	38.2	16	30	0.00033	R	MVNHFVQEFK	R
2	Pavir.Ca02597.1.p|PACid:30205664	Pavir.Ca02597.1.p|PACid:30205664	8721	83285	467	467	38	38	47.9	5.13	236885	1	1	0	868.986	1735.96	2	1735.95	0.0087	0	42.14	26	30	0.0015	R	MVNHFVQEFK	R
2	Pavir.Ca02597.1.p|PACid:30205664	Pavir.Ca02597.1.p|PACid:30205664	8721	83285	467	467	38	38	47.9	5.13	237237	1	1	0	579.984	1736.93	3	1736.93	-0.0027	0	31.05	21	30	0.0052	R	MVNHFVQEFK	R	Deamidated (NQ)	0.0020000000.0
2	Pavir.Ca02597.1.p|PACid:30205664	Pavir.Ca02597.1.p|PACid:30205664	8721	83285	467	467	38	38	47.9	5.13	237238	1	1	0	579.984	1736.93	3	1736.93	-0.0024	0	22.43	20	30	0.03	R	MVNHFVQEFK	R	Deamidated (NQ)	0.0000002000.0
2	Pavir.Ca02597.1.p|PACid:30205664	Pavir.Ca02597.1.p|PACid:30205664	8721	83285	467	467	38	38	47.9	5.13	237239	1	1	0	579.984	1736.93	3	1736.93	-0.0024	0	14.77	13	30	0.041	R	MVNHFVQEFK	R	Deamidated (NQ)	0.0020000000.0
2	Pavir.Ca02597.1.p|PACid:30205664	Pavir.Ca02597.1.p|PACid:30205664	8721	83285	467	467	38	38	47.9	5.13	237240	1	1	0	579.984	1736.93	3	1736.93	-0.0022	0	36.79	22	30	0.002	R	MVNHFVQEFK	R	Deamidated (NQ)	0.0020000000.0
2	Pavir.Ca02597.1.p|PACid:30205664	Pavir.Ca02597.1.p|PACid:30205664	8721	83285	467	467	38	38	47.9	5.13	237242	1	1	0	579.984	1736.93	3	1736.93	-0.0016	0	20.96	17	30	0.022	R	MVNHFVQEFK	R	Deamidated (NQ)	0.0020000000.0
2	Pavir.Ca02597.1.p|PACid:30205664	Pavir.Ca02597.1.p|PACid:30205664	8721	83285	467	467	38	38	47.9	5.13	243172	1	1	0	584.987	1751.94	3	1751.94	-0.0048	0	19.85	14	30	0.014	R	MVNHFVQEFK	R	Oxidation (M)	0.1000000000.0
2	Pavir.Ca02597.1.p|PACid:30205664	Pavir.Ca02597.1.p|PACid:30205664	8721	83285	467	467	38	38	47.9	5.13	243176	1	1	0	584.987	1751.94	3	1751.94	-0.0045	0	20.59	14	30	0.012	R	MVNHFVQEFK	R	Oxidation (M)	0.1000000000.0
2	Pavir.Ca02597.1.p|PACid:30205664	Pavir.Ca02597.1.p|PACid:30205664	8721	83285	467	467	38	38	47.9	5.13	243180	1	1	0	584.987	1751.94	3	1751.94	-0.0038	0	25.3	16	30	0.0068	R	MVNHFVQEFK	R	Oxidation (M)	0.1000000000.0
2	Pavir.Ca02597.1.p|PACid:30205664	Pavir.Ca02597.1.p|PACid:30205664	8721	83285	467	467	38	38	47.9	5.13	243182	1	1	0	876.977	1751.94	2	1751.94	-0.0036	0	51.25	23	30	8.2e-05	R	MVNHFVQEFK	R	Oxidation (M)	0.1000000000.0
2	Pavir.Ca02597.1.p|PACid:30205664	Pavir.Ca02597.1.p|PACid:30205664	8721	83285	467	467	38	38	47.9	5.13	243185	1	1	0	584.987	1751.94	3	1751.94	-0.0034	0	24.17	14	30	0.0054	R	MVNHFVQEFK	R	Oxidation (M)	0.1000000000.0
2	Pavir.Ca02597.1.p|PACid:30205664	Pavir.Ca02597.1.p|PACid:30205664	8721	83285	467	467	38	38	47.9	5.13	243186	1	1	0	584.987	1751.94	3	1751.94	-0.0034	0	31.38	14	30	0.0011	R	MVNHFVQEFK	R	Oxidation (M)	0.1000000000.0
2	Pavir.Ca02597.1.p|PACid:30205664	Pavir.Ca02597.1.p|PACid:30205664	8721	83285	467	467	38	38	47.9	5.13	243188	1	1	0	584.987	1751.94	3	1751.94	-0.0032	0	22.18	14	30	0.0083	R	MVNHFVQEFK	R	Oxidation (M)	0.1000000000.0
2	Pavir.Ca02597.1.p|PACid:30205664	Pavir.Ca02597.1.p|PACid:30205664	8721	83285	467	467	38	38	47.9	5.13	243190	1	1	0	584.987	1751.94	3	1751.94	-0.0032	0	46.12	18	30	9.1e-05	R	MVNHFVQEFK	R	Oxidation (M)	0.1000000000.0
2	Pavir.Ca02597.1.p|PACid:30205664	Pavir.Ca02597.1.p|PACid:30205664	8721	83285	467	467	38	38	47.9	5.13	243191	1	1	0	584.987	1751.94	3	1751.94	-0.0032	0	31.21	14	30	0.0012	R	MVNHFVQEFK	R	Oxidation (M)	0.1000000000.0
2	Pavir.Ca02597.1.p|PACid:30205664	Pavir.Ca02597.1.p|PACid:30205664	8721	83285	467	467	38	38	47.9	5.13	243192	1	1	0	876.977	1751.94	2	1751.94	-0.0032	0	34.29	15	30	0.00061	R	MVNHFVQEFK	R	Oxidation (M)	0.1000000000.0
2	Pavir.Ca02597.1.p|PACid:30205664	Pavir.Ca02597.1.p|PACid:30205664	8721	83285	467	467	38	38	47.9	5.13	243193	1	1	0	438.992	1751.94	4	1751.94	-0.0031	0	16.36	14	30	0.031	R	MVNHFVQEFK	R	Oxidation (M)	0.1000000000.0
2	Pavir.Ca02597.1.p|PACid:30205664	Pavir.Ca02597.1.p|PACid:30205664	8721	83285	467	467	38	38	47.9	5.13	243194	1	1	0	584.987	1751.94	3	1751.94	-0.003	0	26.86	20	30	0.01	R	MVNHFVQEFK	R	Oxidation (M)	0.1000000000.0
2	Pavir.Ca02597.1.p|PACid:30205664	Pavir.Ca02597.1.p|PACid:30205664	8721	83285	467	467	38	38	47.9	5.13	243195	1	1	0	584.987	1751.94	3	1751.94	-0.003	0	27.28	20	30	0.011	R	MVNHFVQEFK	R	Oxidation (M)	0.1000000000.0
2	Pavir.Ca02597.1.p|PACid:30205664	Pavir.Ca02597.1.p|PACid:30205664	8721	83285	467	467	38	38	47.9	5.13	243196	1	1	0	584.987	1751.94	3	1751.94	-0.003	0	46.11	19	30	9.9e-05	R	MVNHFVQEFK	R	Oxidation (M)	0.1000000000.0
2	Pavir.Ca02597.1.p|PACid:30205664	Pavir.Ca02597.1.p|PACid:30205664	8721	83285	467	467	38	38	47.9	5.13	243198	1	1	0	584.987	1751.94	3	1751.94	-0.0028	0	32.48	15	30	0.0009	R	MVNHFVQEFK	R	Oxidation (M)	0.1000000000.0
2	Pavir.Ca02597.1.p|PACid:30205664	Pavir.Ca02597.1.p|PACid:30205664	8721	83285	467	467	38	38	47.9	5.13	243199	1	1	0	876.978	1751.94	2	1751.94	-0.0028	0	44.39	20	30	0.0002	R	MVNHFVQEFK	R	Oxidation (M)	0.1000000000.0
2	Pavir.Ca02597.1.p|PACid:30205664	Pavir.Ca02597.1.p|PACid:30205664	8721	83285	467	467	38	38	47.9	5.13	243201	1	1	0	584.988	1751.94	3	1751.94	-0.0026	0	21.19	14	30	0.01	R	MVNHFVQEFK	R	Oxidation (M)	0.1000000000.0
2	Pavir.Ca02597.1.p|PACid:30205664	Pavir.Ca02597.1.p|PACid:30205664	8721	83285	467	467	38	38	47.9	5.13	243203	1	1	0	584.988	1751.94	3	1751.94	-0.0026	0	20.78	14	30	0.011	R	MVNHFVQEFK	R	Oxidation (M)	0.1000000000.0
2	Pavir.Ca02597.1.p|PACid:30205664	Pavir.Ca02597.1.p|PACid:30205664	8721	83285	467	467	38	38	47.9	5.13	243204	1	1	0	584.988	1751.94	3	1751.94	-0.0026	0	26.96	14	30	0.003	R	MVNHFVQEFK	R	Oxidation (M)	0.1000000000.0
2	Pavir.Ca02597.1.p|PACid:30205664	Pavir.Ca02597.1.p|PACid:30205664	8721	83285	467	467	38	38	47.9	5.13	243205	1	1	0	584.988	1751.94	3	1751.94	-0.0026	0	14.66	13	30	0.042	R	MVNHFVQEFK	R	Oxidation (M)	0.1000000000.0
2	Pavir.Ca02597.1.p|PACid:30205664	Pavir.Ca02597.1.p|PACid:30205664	8721	83285	467	467	38	38	47.9	5.13	243206	1	1	0	438.993	1751.94	4	1751.94	-0.0025	0	26.72	19	30	0.0088	R	MVNHFVQEFK	R	Oxidation (M)	0.1000000000.0
2	Pavir.Ca02597.1.p|PACid:30205664	Pavir.Ca02597.1.p|PACid:30205664	8721	83285	467	467	38	38	47.9	5.13	243210	1	1	0	876.978	1751.94	2	1751.94	-0.0021	0	47.6	15	30	3.4e-05	R	MVNHFVQEFK	R	Oxidation (M)	0.1000000000.0
2	Pavir.Ca02597.1.p|PACid:30205664	Pavir.Ca02597.1.p|PACid:30205664	8721	83285	467	467	38	38	47.9	5.13	243211	1	1	0	876.978	1751.94	2	1751.94	-0.0021	0	51.17	23	30	8.3e-05	R	MVNHFVQEFK	R	Oxidation (M)	0.1000000000.0
2	Pavir.Ca02597.1.p|PACid:30205664	Pavir.Ca02597.1.p|PACid:30205664	8721	83285	467	467	38	38	47.9	5.13	243213	1	1	0	584.988	1751.94	3	1751.94	-0.0019	0	34.21	18	30	0.0012	R	MVNHFVQEFK	R	Oxidation (M)	0.1000000000.0
2	Pavir.Ca02597.1.p|PACid:30205664	Pavir.Ca02597.1.p|PACid:30205664	8721	83285	467	467	38	38	47.9	5.13	243215	1	1	0	584.988	1751.94	3	1751.94	-0.0017	0	31.41	14	30	0.0011	R	MVNHFVQEFK	R	Oxidation (M)	0.1000000000.0
2	Pavir.Ca02597.1.p|PACid:30205664	Pavir.Ca02597.1.p|PACid:30205664	8721	83285	467	467	38	38	47.9	5.13	243216	1	1	0	584.988	1751.94	3	1751.94	-0.0017	0	45.97	15	30	4.9e-05	R	MVNHFVQEFK	R	Oxidation (M)	0.1000000000.0
2	Pavir.Ca02597.1.p|PACid:30205664	Pavir.Ca02597.1.p|PACid:30205664	8721	83285	467	467	38	38	47.9	5.13	243225	1	1	0	584.988	1751.94	3	1751.94	-0.001	0	28.54	14	30	0.0021	R	MVNHFVQEFK	R	Oxidation (M)	0.1000000000.0
2	Pavir.Ca02597.1.p|PACid:30205664	Pavir.Ca02597.1.p|PACid:30205664	8721	83285	467	467	38	38	47.9	5.13	243226	1	1	0	584.988	1751.94	3	1751.94	-0.001	0	27.55	17	30	0.0049	R	MVNHFVQEFK	R	Oxidation (M)	0.1000000000.0
2	Pavir.Ca02597.1.p|PACid:30205664	Pavir.Ca02597.1.p|PACid:30205664	8721	83285	467	467	38	38	47.9	5.13	243227	1	1	0	584.988	1751.94	3	1751.94	-0.0008	0	33.81	17	30	0.0013	R	MVNHFVQEFK	R	Oxidation (M)	0.1000000000.0
2	Pavir.Ca02597.1.p|PACid:30205664	Pavir.Ca02597.1.p|PACid:30205664	8721	83285	467	467	38	38	47.9	5.13	243228	1	1	0	584.988	1751.94	3	1751.94	-0.0008	0	29.33	16	30	0.0026	R	MVNHFVQEFK	R	Oxidation (M)	0.1000000000.0
2	Pavir.Ca02597.1.p|PACid:30205664	Pavir.Ca02597.1.p|PACid:30205664	8721	83285	467	467	38	38	47.9	5.13	243232	1	1	0	584.988	1751.94	3	1751.94	-0.0005	0	35.11	17	30	0.00096	R	MVNHFVQEFK	R	Oxidation (M)	0.1000000000.0
2	Pavir.Ca02597.1.p|PACid:30205664	Pavir.Ca02597.1.p|PACid:30205664	8721	83285	467	467	38	38	47.9	5.13	243343	1	1	0	585.009	1752	3	1752.01	-0.0031	0	25.34	14	30	0.0042	R	EIAEAYLGSTIK	N
2	Pavir.Ca02597.1.p|PACid:30205664	Pavir.Ca02597.1.p|PACid:30205664	8721	83285	467	467	38	38	47.9	5.13	243344	1	1	0	585.009	1752	3	1752.01	-0.0031	0	23.83	14	30	0.0058	R	EIAEAYLGSTIK	N
2	Pavir.Ca02597.1.p|PACid:30205664	Pavir.Ca02597.1.p|PACid:30205664	8721	83285	467	467	38	38	47.9	5.13	243349	1	1	0	877.01	1752.01	2	1752.01	-0.002	0	66.94	26	30	4.5e-06	R	EIAEAYLGSTIK	N
2	Pavir.Ca02597.1.p|PACid:30205664	Pavir.Ca02597.1.p|PACid:30205664	8721	83285	467	467	38	38	47.9	5.13	243580	1	1	0	585.315	1752.92	3	1752.93	-0.0054	0	34.99	17	30	0.00093	R	MVNHFVQEFK	R	Oxidation (M); Deamidated (NQ)	0.1020000000.0
2	Pavir.Ca02597.1.p|PACid:30205664	Pavir.Ca02597.1.p|PACid:30205664	8721	83285	467	467	38	38	47.9	5.13	243582	1	1	0	585.315	1752.92	3	1752.93	-0.0039	0	33.37	15	30	0.00074	R	MVNHFVQEFK	R	Oxidation (M); Deamidated (NQ)	0.1020000000.0
2	Pavir.Ca02597.1.p|PACid:30205664	Pavir.Ca02597.1.p|PACid:30205664	8721	83285	467	467	38	38	47.9	5.13	243583	1	1	0	585.315	1752.92	3	1752.93	-0.0039	0	26.79	16	30	0.0043	R	MVNHFVQEFK	R	Oxidation (M); Deamidated (NQ)	0.1020000000.0
2	Pavir.Ca02597.1.p|PACid:30205664	Pavir.Ca02597.1.p|PACid:30205664	8721	83285	467	467	38	38	47.9	5.13	243585	1	1	0	585.316	1752.92	3	1752.93	-0.0028	0	32.91	16	30	0.0012	R	MVNHFVQEFK	R	Oxidation (M); Deamidated (NQ)	0.1020000000.0
2	Pavir.Ca02597.1.p|PACid:30205664	Pavir.Ca02597.1.p|PACid:30205664	8721	83285	467	467	38	38	47.9	5.13	243586	1	1	0	585.316	1752.92	3	1752.93	-0.0028	0	30.58	16	30	0.0022	R	MVNHFVQEFK	R	Oxidation (M); Deamidated (NQ)	0.1020000000.0
2	Pavir.Ca02597.1.p|PACid:30205664	Pavir.Ca02597.1.p|PACid:30205664	8721	83285	467	467	38	38	47.9	5.13	243587	1	1	0	585.316	1752.92	3	1752.93	-0.0027	0	32.77	18	30	0.0019	R	MVNHFVQEFK	R	Oxidation (M); Deamidated (NQ)	0.1020000000.0
2	Pavir.Ca02597.1.p|PACid:30205664	Pavir.Ca02597.1.p|PACid:30205664	8721	83285	467	467	38	38	47.9	5.13	243588	1	1	0	585.316	1752.92	3	1752.93	-0.0027	0	35.81	17	30	0.00081	R	MVNHFVQEFK	R	Oxidation (M); Deamidated (NQ)	0.1020000000.0
2	Pavir.Ca02597.1.p|PACid:30205664	Pavir.Ca02597.1.p|PACid:30205664	8721	83285	467	467	38	38	47.9	5.13	243589	1	1	0	585.316	1752.93	3	1752.93	-0.0023	0	33.66	17	30	0.0013	R	MVNHFVQEFK	R	Oxidation (M); Deamidated (NQ)	0.1020000000.0
2	Pavir.Ca02597.1.p|PACid:30205664	Pavir.Ca02597.1.p|PACid:30205664	8721	83285	467	467	38	38	47.9	5.13	243590	1	1	0	877.47	1752.93	2	1752.93	-0.002	0	20.38	17	30	0.025	R	MVNHFVQEFK	R	Oxidation (M); Deamidated (NQ)	0.1020000000.0
2	Pavir.Ca02597.1.p|PACid:30205664	Pavir.Ca02597.1.p|PACid:30205664	8721	83285	467	467	38	38	47.9	5.13	243592	1	1	0	877.47	1752.93	2	1752.93	-0.0016	0	56.93	20	30	1.1e-05	R	MVNHFVQEFK	R	Oxidation (M); Deamidated (NQ)	0.1020000000.0
2	Pavir.Ca02597.1.p|PACid:30205664	Pavir.Ca02597.1.p|PACid:30205664	8721	83285	467	467	38	38	47.9	5.13	243593	1	1	0	585.316	1752.93	3	1752.93	-0.0014	0	30.92	16	30	0.0019	R	MVNHFVQEFK	R	Oxidation (M); Deamidated (NQ)	0.1000002000.0
2	Pavir.Ca02597.1.p|PACid:30205664	Pavir.Ca02597.1.p|PACid:30205664	8721	83285	467	467	38	38	47.9	5.13	243595	1	1	0	585.316	1752.93	3	1752.93	-0.0006	0	29.79	14	30	0.0016	R	MVNHFVQEFK	R	Oxidation (M); Deamidated (NQ)	0.1020000000.0
2	Pavir.Ca02597.1.p|PACid:30205664	Pavir.Ca02597.1.p|PACid:30205664	8721	83285	467	467	38	38	47.9	5.13	243598	1	1	0	585.316	1752.93	3	1752.93	-0.0001	0	35.8	17	30	0.00082	R	MVNHFVQEFK	R	Oxidation (M); Deamidated (NQ)	0.1020000000.0
2	Pavir.Ca02597.1.p|PACid:30205664	Pavir.Ca02597.1.p|PACid:30205664	8721	83285	467	467	38	38	47.9	5.13	243599	1	1	0	585.317	1752.93	3	1752.93	0.0003	0	35.33	17	30	0.00075	R	MVNHFVQEFK	R	Oxidation (M); Deamidated (NQ)	0.1020000000.0
2	Pavir.Ca02597.1.p|PACid:30205664	Pavir.Ca02597.1.p|PACid:30205664	8721	83285	467	467	38	38	47.9	5.13	243629	1	1	0	585.322	1752.94	3	1752.93	0.0166	0	25.74	14	30	0.0039	R	MVNHFVQEFK	R	Oxidation (M); Deamidated (NQ)	0.1020000000.0
2	Pavir.Ca02597.1.p|PACid:30205664	Pavir.Ca02597.1.p|PACid:30205664	8721	83285	467	467	38	38	47.9	5.13	243969	1	1	0	585.649	1753.93	3	1753.91	0.0146	0	27.2	25	29	0.031	R	MVNHFVQEFK	R	Oxidation (M); 2 Deamidated (NQ)	0.1020002000.0
2	Pavir.Ca02597.1.p|PACid:30205664	Pavir.Ca02597.1.p|PACid:30205664	8721	83285	467	467	38	38	47.9	5.13	254978	1	1	0	595.974	1784.9	3	1784.91	-0.0079	1	15.67	13	28	0.034	R	ARFEELNMDLFR	K	Oxidation (M)	0.000000010000.0
2	Pavir.Ca02597.1.p|PACid:30205664	Pavir.Ca02597.1.p|PACid:30205664	8721	83285	467	467	38	38	47.9	5.13	254981	1	1	0	595.976	1784.9	3	1784.91	-0.0035	1	22.71	14	28	0.0074	R	ARFEELNMDLFR	K	Oxidation (M)	0.000000010000.0
2	Pavir.Ca02597.1.p|PACid:30205664	Pavir.Ca02597.1.p|PACid:30205664	8721	83285	467	467	38	38	47.9	5.13	254983	1	1	0	595.976	1784.91	3	1784.91	-0.0031	1	29.39	14	28	0.0018	R	ARFEELNMDLFR	K	Oxidation (M)	0.000000010000.0
2	Pavir.Ca02597.1.p|PACid:30205664	Pavir.Ca02597.1.p|PACid:30205664	8721	83285	467	467	38	38	47.9	5.13	254989	1	1	0	595.976	1784.91	3	1784.91	-0.0022	1	31.08	14	28	0.0012	R	ARFEELNMDLFR	K	Oxidation (M)	0.000000010000.0
2	Pavir.Ca02597.1.p|PACid:30205664	Pavir.Ca02597.1.p|PACid:30205664	8721	83285	467	467	38	38	47.9	5.13	254990	1	1	0	893.46	1784.91	2	1784.91	-0.0021	1	36.9	24	28	0.0029	R	ARFEELNMDLFR	K	Oxidation (M)	0.000000010000.0
2	Pavir.Ca02597.1.p|PACid:30205664	Pavir.Ca02597.1.p|PACid:30205664	8721	83285	467	467	38	38	47.9	5.13	254991	1	1	0	595.976	1784.91	3	1784.91	-0.0018	1	24.83	14	28	0.0047	R	ARFEELNMDLFR	K	Oxidation (M)	0.000000010000.0
2	Pavir.Ca02597.1.p|PACid:30205664	Pavir.Ca02597.1.p|PACid:30205664	8721	83285	467	467	38	38	47.9	5.13	255336	1	1	0	893.961	1785.91	2	1785.89	0.0159	1	39.1	17	28	0.00034	R	ARFEELNMDLFR	K	Oxidation (M); Deamidated (NQ)	0.000000210000.0
2	Pavir.Ca02597.1.p|PACid:30205664	Pavir.Ca02597.1.p|PACid:30205664	8721	83285	467	467	38	38	47.9	5.13	272390	1	1	0	917.512	1833.01	2	1833.01	-0.0049	0	61.3	26	31	1.8e-05	K	ELESLCNPIIAK	M
2	Pavir.Ca02597.1.p|PACid:30205664	Pavir.Ca02597.1.p|PACid:30205664	8721	83285	467	467	38	38	47.9	5.13	272391	1	1	0	612.011	1833.01	3	1833.01	-0.0045	0	30.92	18	31	0.0029	K	ELESLCNPIIAK	M
2	Pavir.Ca02597.1.p|PACid:30205664	Pavir.Ca02597.1.p|PACid:30205664	8721	83285	467	467	38	38	47.9	5.13	272392	1	1	0	917.513	1833.01	2	1833.01	-0.0036	0	70.9		31	6.1e-06	K	ELESLCNPIIAK	M
2	Pavir.Ca02597.1.p|PACid:30205664	Pavir.Ca02597.1.p|PACid:30205664	8721	83285	467	467	38	38	47.9	5.13	272395	1	1	0	917.513	1833.01	2	1833.01	-0.0033	0	76.09		31	1.9e-06	K	ELESLCNPIIAK	M
2	Pavir.Ca02597.1.p|PACid:30205664	Pavir.Ca02597.1.p|PACid:30205664	8721	83285	467	467	38	38	47.9	5.13	272396	1	1	0	917.513	1833.01	2	1833.01	-0.0031	0	87.39		31	1.4e-07	K	ELESLCNPIIAK	M
2	Pavir.Ca02597.1.p|PACid:30205664	Pavir.Ca02597.1.p|PACid:30205664	8721	83285	467	467	38	38	47.9	5.13	272397	1	1	0	612.011	1833.01	3	1833.01	-0.003	0	28.96	19	31	0.0057	K	ELESLCNPIIAK	M
2	Pavir.Ca02597.1.p|PACid:30205664	Pavir.Ca02597.1.p|PACid:30205664	8721	83285	467	467	38	38	47.9	5.13	272398	1	1	0	612.011	1833.01	3	1833.01	-0.003	0	34.48	17	31	0.00098	K	ELESLCNPIIAK	M
2	Pavir.Ca02597.1.p|PACid:30205664	Pavir.Ca02597.1.p|PACid:30205664	8721	83285	467	467	38	38	47.9	5.13	272399	1	1	0	917.513	1833.01	2	1833.01	-0.0027	0	72.25	29	31	2.9e-06	K	ELESLCNPIIAK	M
2	Pavir.Ca02597.1.p|PACid:30205664	Pavir.Ca02597.1.p|PACid:30205664	8721	83285	467	467	38	38	47.9	5.13	272400	1	1	0	917.513	1833.01	2	1833.01	-0.0027	0	85.42	30	31	1.8e-07	K	ELESLCNPIIAK	M
2	Pavir.Ca02597.1.p|PACid:30205664	Pavir.Ca02597.1.p|PACid:30205664	8721	83285	467	467	38	38	47.9	5.13	272402	1	1	0	612.011	1833.01	3	1833.01	-0.0027	0	38.38	19	31	0.00068	K	ELESLCNPIIAK	M
2	Pavir.Ca02597.1.p|PACid:30205664	Pavir.Ca02597.1.p|PACid:30205664	8721	83285	467	467	38	38	47.9	5.13	272403	1	1	0	917.513	1833.01	2	1833.01	-0.0026	0	20.86	19	31	0.04	K	ELESLCNPIIAK	M
2	Pavir.Ca02597.1.p|PACid:30205664	Pavir.Ca02597.1.p|PACid:30205664	8721	83285	467	467	38	38	47.9	5.13	272404	1	1	0	917.513	1833.01	2	1833.01	-0.0025	0	66.82		31	1.6e-05	K	ELESLCNPIIAK	M
2	Pavir.Ca02597.1.p|PACid:30205664	Pavir.Ca02597.1.p|PACid:30205664	8721	83285	467	467	38	38	47.9	5.13	272407	1	1	0	917.514	1833.01	2	1833.01	-0.0019	0	17.56	14	31	0.023	K	ELESLCNPIIAK	M
2	Pavir.Ca02597.1.p|PACid:30205664	Pavir.Ca02597.1.p|PACid:30205664	8721	83285	467	467	38	38	47.9	5.13	272408	1	1	0	612.011	1833.01	3	1833.01	-0.0017	0	35.78	19	31	0.0012	K	ELESLCNPIIAK	M
2	Pavir.Ca02597.1.p|PACid:30205664	Pavir.Ca02597.1.p|PACid:30205664	8721	83285	467	467	38	38	47.9	5.13	272410	1	1	0	612.012	1833.01	3	1833.01	-0.001	0	21.16	14	31	0.011	K	ELESLCNPIIAK	M
2	Pavir.Ca02597.1.p|PACid:30205664	Pavir.Ca02597.1.p|PACid:30205664	8721	83285	467	467	38	38	47.9	5.13	272413	1	1	0	612.012	1833.01	3	1833.01	-0.0007	0	31.13	18	31	0.0028	K	ELESLCNPIIAK	M
2	Pavir.Ca02597.1.p|PACid:30205664	Pavir.Ca02597.1.p|PACid:30205664	8721	83285	467	467	38	38	47.9	5.13	272416	1	1	0	612.012	1833.01	3	1833.01	0.0003	0	40.52	19	31	0.00044	K	ELESLCNPIIAK	M
2	Pavir.Ca02597.1.p|PACid:30205664	Pavir.Ca02597.1.p|PACid:30205664	8721	83285	467	467	38	38	47.9	5.13	296442	1	1	0	635.634	1903.88	3	1903.89	-0.0057	0	29.31	14	25	0.0018	K	ATAGDTHLGGEDFDNR	M
2	Pavir.Ca02597.1.p|PACid:30205664	Pavir.Ca02597.1.p|PACid:30205664	8721	83285	467	467	38	38	47.9	5.13	296443	1	1	0	952.948	1903.88	2	1903.89	-0.0055	0	47.1	15	25	3.8e-05	K	ATAGDTHLGGEDFDNR	M
2	Pavir.Ca02597.1.p|PACid:30205664	Pavir.Ca02597.1.p|PACid:30205664	8721	83285	467	467	38	38	47.9	5.13	296444	1	1	0	635.634	1903.88	3	1903.89	-0.0053	0	13.91	13	25	0.05	K	ATAGDTHLGGEDFDNR	M
2	Pavir.Ca02597.1.p|PACid:30205664	Pavir.Ca02597.1.p|PACid:30205664	8721	83285	467	467	38	38	47.9	5.13	296447	1	1	0	635.635	1903.88	3	1903.89	-0.0046	0	29.58	14	25	0.0017	K	ATAGDTHLGGEDFDNR	M
2	Pavir.Ca02597.1.p|PACid:30205664	Pavir.Ca02597.1.p|PACid:30205664	8721	83285	467	467	38	38	47.9	5.13	296448	1	1	0	635.635	1903.88	3	1903.89	-0.0044	0	22.09	14	25	0.0085	K	ATAGDTHLGGEDFDNR	M
2	Pavir.Ca02597.1.p|PACid:30205664	Pavir.Ca02597.1.p|PACid:30205664	8721	83285	467	467	38	38	47.9	5.13	296449	1	1	0	635.635	1903.88	3	1903.89	-0.0044	0	54.41	16	25	7.9e-06	K	ATAGDTHLGGEDFDNR	M
2	Pavir.Ca02597.1.p|PACid:30205664	Pavir.Ca02597.1.p|PACid:30205664	8721	83285	467	467	38	38	47.9	5.13	296450	1	1	0	635.635	1903.88	3	1903.89	-0.0042	0	18.68	14	25	0.018	K	ATAGDTHLGGEDFDNR	M
2	Pavir.Ca02597.1.p|PACid:30205664	Pavir.Ca02597.1.p|PACid:30205664	8721	83285	467	467	38	38	47.9	5.13	296452	1	1	0	635.635	1903.88	3	1903.89	-0.0039	0	15.16	13	25	0.038	K	ATAGDTHLGGEDFDNR	M
2	Pavir.Ca02597.1.p|PACid:30205664	Pavir.Ca02597.1.p|PACid:30205664	8721	83285	467	467	38	38	47.9	5.13	296455	1	1	0	635.635	1903.88	3	1903.89	-0.0037	0	50.39	16	25	1.9e-05	K	ATAGDTHLGGEDFDNR	M
2	Pavir.Ca02597.1.p|PACid:30205664	Pavir.Ca02597.1.p|PACid:30205664	8721	83285	467	467	38	38	47.9	5.13	296456	1	1	0	952.949	1903.88	2	1903.89	-0.0037	0	50.45	22	25	7.8e-05	K	ATAGDTHLGGEDFDNR	M
2	Pavir.Ca02597.1.p|PACid:30205664	Pavir.Ca02597.1.p|PACid:30205664	8721	83285	467	467	38	38	47.9	5.13	296457	1	1	0	952.949	1903.88	2	1903.89	-0.0037	0	53.54	16	25	9.5e-06	K	ATAGDTHLGGEDFDNR	M
2	Pavir.Ca02597.1.p|PACid:30205664	Pavir.Ca02597.1.p|PACid:30205664	8721	83285	467	467	38	38	47.9	5.13	296458	1	1	0	635.635	1903.88	3	1903.89	-0.0035	0	47.71	15	25	3.4e-05	K	ATAGDTHLGGEDFDNR	M
2	Pavir.Ca02597.1.p|PACid:30205664	Pavir.Ca02597.1.p|PACid:30205664	8721	83285	467	467	38	38	47.9	5.13	296459	1	1	0	635.635	1903.88	3	1903.89	-0.0033	0	15.58	13	25	0.035	K	ATAGDTHLGGEDFDNR	M
2	Pavir.Ca02597.1.p|PACid:30205664	Pavir.Ca02597.1.p|PACid:30205664	8721	83285	467	467	38	38	47.9	5.13	296460	1	1	0	635.635	1903.88	3	1903.89	-0.0033	0	14.84	13	25	0.041	K	ATAGDTHLGGEDFDNR	M
2	Pavir.Ca02597.1.p|PACid:30205664	Pavir.Ca02597.1.p|PACid:30205664	8721	83285	467	467	38	38	47.9	5.13	296461	1	1	0	635.635	1903.88	3	1903.89	-0.0033	0	16.66	14	25	0.027	K	ATAGDTHLGGEDFDNR	M
2	Pavir.Ca02597.1.p|PACid:30205664	Pavir.Ca02597.1.p|PACid:30205664	8721	83285	467	467	38	38	47.9	5.13	296462	1	1	0	635.635	1903.88	3	1903.89	-0.0033	0	61.09	16	25	1.9e-06	K	ATAGDTHLGGEDFDNR	M
2	Pavir.Ca02597.1.p|PACid:30205664	Pavir.Ca02597.1.p|PACid:30205664	8721	83285	467	467	38	38	47.9	5.13	296463	1	1	0	635.635	1903.88	3	1903.89	-0.0033	0	33.58	15	25	0.00071	K	ATAGDTHLGGEDFDNR	M
2	Pavir.Ca02597.1.p|PACid:30205664	Pavir.Ca02597.1.p|PACid:30205664	8721	83285	467	467	38	38	47.9	5.13	296464	1	1	0	952.949	1903.88	2	1903.89	-0.0033	0	58.91	16	25	3e-06	K	ATAGDTHLGGEDFDNR	M
2	Pavir.Ca02597.1.p|PACid:30205664	Pavir.Ca02597.1.p|PACid:30205664	8721	83285	467	467	38	38	47.9	5.13	296466	1	1	0	635.635	1903.88	3	1903.89	-0.0031	0	19.48	14	25	0.015	K	ATAGDTHLGGEDFDNR	M
2	Pavir.Ca02597.1.p|PACid:30205664	Pavir.Ca02597.1.p|PACid:30205664	8721	83285	467	467	38	38	47.9	5.13	296467	1	1	0	635.635	1903.88	3	1903.89	-0.0031	0	27.06	14	25	0.0029	K	ATAGDTHLGGEDFDNR	M
2	Pavir.Ca02597.1.p|PACid:30205664	Pavir.Ca02597.1.p|PACid:30205664	8721	83285	467	467	38	38	47.9	5.13	296468	1	1	0	635.635	1903.88	3	1903.89	-0.0031	0	16.67	14	25	0.027	K	ATAGDTHLGGEDFDNR	M
2	Pavir.Ca02597.1.p|PACid:30205664	Pavir.Ca02597.1.p|PACid:30205664	8721	83285	467	467	38	38	47.9	5.13	296469	1	1	0	635.635	1903.88	3	1903.89	-0.0031	0	28.7	14	25	0.002	K	ATAGDTHLGGEDFDNR	M
2	Pavir.Ca02597.1.p|PACid:30205664	Pavir.Ca02597.1.p|PACid:30205664	8721	83285	467	467	38	38	47.9	5.13	296470	1	1	0	635.635	1903.88	3	1903.89	-0.0031	0	17.81	14	25	0.021	K	ATAGDTHLGGEDFDNR	M
2	Pavir.Ca02597.1.p|PACid:30205664	Pavir.Ca02597.1.p|PACid:30205664	8721	83285	467	467	38	38	47.9	5.13	296472	1	1	0	635.635	1903.88	3	1903.89	-0.003	0	16.02	14	25	0.031	K	ATAGDTHLGGEDFDNR	M
2	Pavir.Ca02597.1.p|PACid:30205664	Pavir.Ca02597.1.p|PACid:30205664	8721	83285	467	467	38	38	47.9	5.13	296473	1	1	0	635.635	1903.88	3	1903.89	-0.003	0	26.46	14	25	0.0033	K	ATAGDTHLGGEDFDNR	M
2	Pavir.Ca02597.1.p|PACid:30205664	Pavir.Ca02597.1.p|PACid:30205664	8721	83285	467	467	38	38	47.9	5.13	296474	1	1	0	952.949	1903.88	2	1903.89	-0.0028	0	29.69	14	25	0.0016	K	ATAGDTHLGGEDFDNR	M
2	Pavir.Ca02597.1.p|PACid:30205664	Pavir.Ca02597.1.p|PACid:30205664	8721	83285	467	467	38	38	47.9	5.13	296476	1	1	0	635.635	1903.88	3	1903.89	-0.0028	0	46.12	15	25	4.7e-05	K	ATAGDTHLGGEDFDNR	M
2	Pavir.Ca02597.1.p|PACid:30205664	Pavir.Ca02597.1.p|PACid:30205664	8721	83285	467	467	38	38	47.9	5.13	296477	1	1	0	635.635	1903.88	3	1903.89	-0.0028	0	30.48	14	25	0.0014	K	ATAGDTHLGGEDFDNR	M
2	Pavir.Ca02597.1.p|PACid:30205664	Pavir.Ca02597.1.p|PACid:30205664	8721	83285	467	467	38	38	47.9	5.13	296478	1	1	0	635.635	1903.88	3	1903.89	-0.0028	0	36.31	15	25	0.00039	K	ATAGDTHLGGEDFDNR	M
2	Pavir.Ca02597.1.p|PACid:30205664	Pavir.Ca02597.1.p|PACid:30205664	8721	83285	467	467	38	38	47.9	5.13	296479	1	1	0	635.635	1903.88	3	1903.89	-0.0028	0	17.46	14	25	0.023	K	ATAGDTHLGGEDFDNR	M
2	Pavir.Ca02597.1.p|PACid:30205664	Pavir.Ca02597.1.p|PACid:30205664	8721	83285	467	467	38	38	47.9	5.13	296482	1	1	0	635.635	1903.88	3	1903.89	-0.0026	0	15.91	13	25	0.032	K	ATAGDTHLGGEDFDNR	M
2	Pavir.Ca02597.1.p|PACid:30205664	Pavir.Ca02597.1.p|PACid:30205664	8721	83285	467	467	38	38	47.9	5.13	296483	1	1	0	635.635	1903.88	3	1903.89	-0.0022	0	16.67	14	25	0.027	K	ATAGDTHLGGEDFDNR	M
2	Pavir.Ca02597.1.p|PACid:30205664	Pavir.Ca02597.1.p|PACid:30205664	8721	83285	467	467	38	38	47.9	5.13	296484	1	1	0	952.949	1903.88	2	1903.89	-0.0021	0	111.64		25	1.1e-10	K	ATAGDTHLGGEDFDNR	M
2	Pavir.Ca02597.1.p|PACid:30205664	Pavir.Ca02597.1.p|PACid:30205664	8721	83285	467	467	38	38	47.9	5.13	296486	1	1	0	635.635	1903.88	3	1903.89	-0.002	0	13.93	13	25	0.049	K	ATAGDTHLGGEDFDNR	M
2	Pavir.Ca02597.1.p|PACid:30205664	Pavir.Ca02597.1.p|PACid:30205664	8721	83285	467	467	38	38	47.9	5.13	296487	1	1	0	476.978	1903.88	4	1903.89	-0.0019	0	24.65	14	25	0.0049	K	ATAGDTHLGGEDFDNR	M
2	Pavir.Ca02597.1.p|PACid:30205664	Pavir.Ca02597.1.p|PACid:30205664	8721	83285	467	467	38	38	47.9	5.13	296488	1	1	0	952.949	1903.88	2	1903.89	-0.0018	0	30.04	17	25	0.0026	K	ATAGDTHLGGEDFDNR	M
2	Pavir.Ca02597.1.p|PACid:30205664	Pavir.Ca02597.1.p|PACid:30205664	8721	83285	467	467	38	38	47.9	5.13	296491	1	1	0	635.636	1903.88	3	1903.89	-0.0013	0	41.14	15	25	0.00014	K	ATAGDTHLGGEDFDNR	M
2	Pavir.Ca02597.1.p|PACid:30205664	Pavir.Ca02597.1.p|PACid:30205664	8721	83285	467	467	38	38	47.9	5.13	296492	1	1	0	635.636	1903.89	3	1903.89	-0.0009	0	45.73	19	25	0.00013	K	ATAGDTHLGGEDFDNR	M
2	Pavir.Ca02597.1.p|PACid:30205664	Pavir.Ca02597.1.p|PACid:30205664	8721	83285	467	467	38	38	47.9	5.13	296727	1	1	0	635.963	1904.87	3	1904.87	-0.004	0	40.29	15	24	0.00017	K	ATAGDTHLGGEDFDNR	M	Deamidated (NQ)	0.0000000000000020.0
2	Pavir.Ca02597.1.p|PACid:30205664	Pavir.Ca02597.1.p|PACid:30205664	8721	83285	467	467	38	38	47.9	5.13	296732	1	1	0	635.969	1904.88	3	1904.87	0.0144	0	21.47	14	25	0.0097	K	ATAGDTHLGGEDFDNR	M	Deamidated (NQ)	0.0000000000000020.0
2	Pavir.Ca02597.1.p|PACid:30205664	Pavir.Ca02597.1.p|PACid:30205664	8721	83285	467	467	38	38	47.9	5.13	298126	1	1	0	955.496	1908.98	2	1908.99	-0.0122	0	32.41	23	30	0.0063	K	NAVVTVPAYFNDSQR	Q
2	Pavir.Ca02597.1.p|PACid:30205664	Pavir.Ca02597.1.p|PACid:30205664	8721	83285	467	467	38	38	47.9	5.13	298127	1	1	0	637.333	1908.98	3	1908.99	-0.0112	0	22.64	14	30	0.0075	K	NAVVTVPAYFNDSQR	Q
2	Pavir.Ca02597.1.p|PACid:30205664	Pavir.Ca02597.1.p|PACid:30205664	8721	83285	467	467	38	38	47.9	5.13	298138	1	1	0	637.335	1908.98	3	1908.99	-0.0053	0	27.82	14	30	0.0025	K	NAVVTVPAYFNDSQR	Q
2	Pavir.Ca02597.1.p|PACid:30205664	Pavir.Ca02597.1.p|PACid:30205664	8721	83285	467	467	38	38	47.9	5.13	298140	1	1	0	955.5	1908.98	2	1908.99	-0.0047	0	49.19	16	30	2.6e-05	K	NAVVTVPAYFNDSQR	Q
2	Pavir.Ca02597.1.p|PACid:30205664	Pavir.Ca02597.1.p|PACid:30205664	8721	83285	467	467	38	38	47.9	5.13	298141	1	1	0	955.5	1908.99	2	1908.99	-0.0042	0	42.57	15	30	0.00011	K	NAVVTVPAYFNDSQR	Q
2	Pavir.Ca02597.1.p|PACid:30205664	Pavir.Ca02597.1.p|PACid:30205664	8721	83285	467	467	38	38	47.9	5.13	298143	1	1	0	955.5	1908.99	2	1908.99	-0.0041	0	70.81	17	30	2.3e-07	K	NAVVTVPAYFNDSQR	Q
2	Pavir.Ca02597.1.p|PACid:30205664	Pavir.Ca02597.1.p|PACid:30205664	8721	83285	467	467	38	38	47.9	5.13	298145	1	1	0	955.5	1908.99	2	1908.99	-0.0035	0	68.88	19	30	6.4e-07	K	NAVVTVPAYFNDSQR	Q
2	Pavir.Ca02597.1.p|PACid:30205664	Pavir.Ca02597.1.p|PACid:30205664	8721	83285	467	467	38	38	47.9	5.13	298147	1	1	0	955.5	1908.99	2	1908.99	-0.0032	0	75.62	19	30	1.3e-07	K	NAVVTVPAYFNDSQR	Q
2	Pavir.Ca02597.1.p|PACid:30205664	Pavir.Ca02597.1.p|PACid:30205664	8721	83285	467	467	38	38	47.9	5.13	298148	1	1	0	637.336	1908.99	3	1908.99	-0.0031	0	21.46	14	30	0.0097	K	NAVVTVPAYFNDSQR	Q
2	Pavir.Ca02597.1.p|PACid:30205664	Pavir.Ca02597.1.p|PACid:30205664	8721	83285	467	467	38	38	47.9	5.13	298149	1	1	0	955.501	1908.99	2	1908.99	-0.003	0	25.36	14	30	0.0042	K	NAVVTVPAYFNDSQR	Q
2	Pavir.Ca02597.1.p|PACid:30205664	Pavir.Ca02597.1.p|PACid:30205664	8721	83285	467	467	38	38	47.9	5.13	298151	1	1	0	637.336	1908.99	3	1908.99	-0.0028	0	46.05	15	30	4.8e-05	K	NAVVTVPAYFNDSQR	Q
2	Pavir.Ca02597.1.p|PACid:30205664	Pavir.Ca02597.1.p|PACid:30205664	8721	83285	467	467	38	38	47.9	5.13	298152	1	1	0	955.501	1908.99	2	1908.99	-0.0024	0	22.28	14	30	0.0081	K	NAVVTVPAYFNDSQR	Q
2	Pavir.Ca02597.1.p|PACid:30205664	Pavir.Ca02597.1.p|PACid:30205664	8721	83285	467	467	38	38	47.9	5.13	298153	1	1	0	955.501	1908.99	2	1908.99	-0.0024	0	75.66	19	30	1.2e-07	K	NAVVTVPAYFNDSQR	Q
2	Pavir.Ca02597.1.p|PACid:30205664	Pavir.Ca02597.1.p|PACid:30205664	8721	83285	467	467	38	38	47.9	5.13	298155	1	1	0	637.337	1908.99	3	1908.99	-0.0018	0	38.9	15	30	0.00022	K	NAVVTVPAYFNDSQR	Q
2	Pavir.Ca02597.1.p|PACid:30205664	Pavir.Ca02597.1.p|PACid:30205664	8721	83285	467	467	38	38	47.9	5.13	298162	1	1	0	955.502	1908.99	2	1908.99	-0.0007	0	29.92	14	30	0.0016	K	NAVVTVPAYFNDSQR	Q
2	Pavir.Ca02597.1.p|PACid:30205664	Pavir.Ca02597.1.p|PACid:30205664	8721	83285	467	467	38	38	47.9	5.13	298164	1	1	0	955.502	1908.99	2	1908.99	-0.0003	0	24.95	14	30	0.0046	K	NAVVTVPAYFNDSQR	Q
2	Pavir.Ca02597.1.p|PACid:30205664	Pavir.Ca02597.1.p|PACid:30205664	8721	83285	467	467	38	38	47.9	5.13	298165	1	1	0	955.502	1908.99	2	1908.99	-0.0001	0	31.47	14	30	0.0011	K	NAVVTVPAYFNDSQR	Q
2	Pavir.Ca02597.1.p|PACid:30205664	Pavir.Ca02597.1.p|PACid:30205664	8721	83285	467	467	38	38	47.9	5.13	298166	1	1	0	637.337	1908.99	3	1908.99	0	0	36.93	15	30	0.00034	K	NAVVTVPAYFNDSQR	Q
2	Pavir.Ca02597.1.p|PACid:30205664	Pavir.Ca02597.1.p|PACid:30205664	8721	83285	467	467	38	38	47.9	5.13	298167	1	1	0	637.337	1908.99	3	1908.99	0.0007	0	50.95	16	30	1.7e-05	K	NAVVTVPAYFNDSQR	Q
2	Pavir.Ca02597.1.p|PACid:30205664	Pavir.Ca02597.1.p|PACid:30205664	8721	83285	467	467	38	38	47.9	5.13	298463	1	1	0	955.992	1909.97	2	1909.97	-0.0033	0	48.22	17	30	4.5e-05	K	NAVVTVPAYFNDSQR	Q	Deamidated (NQ)	0.000000000020000.0
2	Pavir.Ca02597.1.p|PACid:30205664	Pavir.Ca02597.1.p|PACid:30205664	8721	83285	467	467	38	38	47.9	5.13	298464	1	1	0	955.993	1909.97	2	1909.97	-0.003	0	45.63	15	30	5.3e-05	K	NAVVTVPAYFNDSQR	Q	Deamidated (NQ)	0.000000000020000.0
2	Pavir.Ca02597.1.p|PACid:30205664	Pavir.Ca02597.1.p|PACid:30205664	8721	83285	467	467	38	38	47.9	5.13	298468	1	1	0	955.993	1909.97	2	1909.97	-0.0022	0	25.77	17	30	0.0068	K	NAVVTVPAYFNDSQR	Q	Deamidated (NQ)	0.200000000000000.0
2	Pavir.Ca02597.1.p|PACid:30205664	Pavir.Ca02597.1.p|PACid:30205664	8721	83285	467	467	38	38	47.9	5.13	298469	1	1	0	955.993	1909.97	2	1909.97	-0.002	0	46.24	15	30	4.6e-05	K	NAVVTVPAYFNDSQR	Q	Deamidated (NQ)	0.000000000020000.0
2	Pavir.Ca02597.1.p|PACid:30205664	Pavir.Ca02597.1.p|PACid:30205664	8721	83285	467	467	38	38	47.9	5.13	298491	1	1	0	955.995	1909.98	2	1909.97	0.0014	0	20.81	14	30	0.011	K	NAVVTVPAYFNDSQR	Q	Deamidated (NQ)	0.000000000020000.0
2	Pavir.Ca02597.1.p|PACid:30205664	Pavir.Ca02597.1.p|PACid:30205664	8721	83285	467	467	38	38	47.9	5.13	298492	1	1	0	637.666	1909.98	3	1909.97	0.0018	0	17.47	14	30	0.023	K	NAVVTVPAYFNDSQR	Q	Deamidated (NQ)	0.200000000000000.0
2	Pavir.Ca02597.1.p|PACid:30205664	Pavir.Ca02597.1.p|PACid:30205664	8721	83285	467	467	38	38	47.9	5.13	353052	1	1	0	521.819	2083.25	4	2083.25	-0.0047	1	17.45	14	28	0.028	R	QATKDAGVIAGLNVLR	I
2	Pavir.Ca02597.1.p|PACid:30205664	Pavir.Ca02597.1.p|PACid:30205664	8721	83285	467	467	38	38	47.9	5.13	353053	1	1	0	695.423	2083.25	3	2083.25	-0.0035	1	15.45	13	28	0.036	R	QATKDAGVIAGLNVLR	I
2	Pavir.Ca02597.1.p|PACid:30205664	Pavir.Ca02597.1.p|PACid:30205664	8721	83285	467	467	38	38	47.9	5.13	353054	1	1	0	695.423	2083.25	3	2083.25	-0.0035	1	27.59	14	28	0.0026	R	QATKDAGVIAGLNVLR	I
2	Pavir.Ca02597.1.p|PACid:30205664	Pavir.Ca02597.1.p|PACid:30205664	8721	83285	467	467	38	38	47.9	5.13	353056	1	1	0	521.819	2083.25	4	2083.25	-0.0034	1	35.2	15	28	0.0005	R	QATKDAGVIAGLNVLR	I
2	Pavir.Ca02597.1.p|PACid:30205664	Pavir.Ca02597.1.p|PACid:30205664	8721	83285	467	467	38	38	47.9	5.13	361859	1	1	0	1059.61	2117.21	2	2117.21	-0.0042	0	49.53	26	31	0.00023	R	IINEPTAAAIAYGLDK	K
2	Pavir.Ca02597.1.p|PACid:30205664	Pavir.Ca02597.1.p|PACid:30205664	8721	83285	467	467	38	38	47.9	5.13	361860	1	1	0	706.744	2117.21	3	2117.21	-0.0035	0	14.9	13	31	0.04	R	IINEPTAAAIAYGLDK	K
2	Pavir.Ca02597.1.p|PACid:30205664	Pavir.Ca02597.1.p|PACid:30205664	8721	83285	467	467	38	38	47.9	5.13	361861	1	1	0	706.744	2117.21	3	2117.21	-0.0035	0	16.89	14	31	0.026	R	IINEPTAAAIAYGLDK	K
2	Pavir.Ca02597.1.p|PACid:30205664	Pavir.Ca02597.1.p|PACid:30205664	8721	83285	467	467	38	38	47.9	5.13	361863	1	1	0	706.744	2117.21	3	2117.21	-0.0032	0	45.94	16	31	5.7e-05	R	IINEPTAAAIAYGLDK	K
2	Pavir.Ca02597.1.p|PACid:30205664	Pavir.Ca02597.1.p|PACid:30205664	8721	83285	467	467	38	38	47.9	5.13	361864	1	1	0	706.744	2117.21	3	2117.21	-0.003	0	29.52	15	31	0.0018	R	IINEPTAAAIAYGLDK	K
2	Pavir.Ca02597.1.p|PACid:30205664	Pavir.Ca02597.1.p|PACid:30205664	8721	83285	467	467	38	38	47.9	5.13	361866	1	1	0	706.744	2117.21	3	2117.21	-0.0024	0	33.75	18	31	0.0015	R	IINEPTAAAIAYGLDK	K
2	Pavir.Ca02597.1.p|PACid:30205664	Pavir.Ca02597.1.p|PACid:30205664	8721	83285	467	467	38	38	47.9	5.13	361867	1	1	0	706.744	2117.21	3	2117.21	-0.0024	0	46.62	17	31	6.7e-05	R	IINEPTAAAIAYGLDK	K
2	Pavir.Ca02597.1.p|PACid:30205664	Pavir.Ca02597.1.p|PACid:30205664	8721	83285	467	467	38	38	47.9	5.13	361871	1	1	0	706.745	2117.21	3	2117.21	-0.001	0	30.34	14	31	0.0014	R	IINEPTAAAIAYGLDK	K
2	Pavir.Ca02597.1.p|PACid:30205664	Pavir.Ca02597.1.p|PACid:30205664	8721	83285	467	467	38	38	47.9	5.13	361872	1	1	0	706.745	2117.21	3	2117.21	-0.001	0	22.68	14	31	0.0075	R	IINEPTAAAIAYGLDK	K
2	Pavir.Ca02597.1.p|PACid:30205664	Pavir.Ca02597.1.p|PACid:30205664	8721	83285	467	467	38	38	47.9	5.13	361873	1	1	0	706.745	2117.21	3	2117.21	-0.0006	0	35.44	15	31	0.00047	R	IINEPTAAAIAYGLDK	K
2	Pavir.Ca02597.1.p|PACid:30205664	Pavir.Ca02597.1.p|PACid:30205664	8721	83285	467	467	38	38	47.9	5.13	361876	1	1	0	706.745	2117.21	3	2117.21	-0.0004	0	16.94	14	30	0.026	R	IINEPTAAAIAYGLDK	K
2	Pavir.Ca02597.1.p|PACid:30205664	Pavir.Ca02597.1.p|PACid:30205664	8721	83285	467	467	38	38	47.9	5.13	361877	1	1	0	706.745	2117.21	3	2117.21	0.0007	0	26.36	14	30	0.0034	R	IINEPTAAAIAYGLDK	K
2	Pavir.Ca02597.1.p|PACid:30205664	Pavir.Ca02597.1.p|PACid:30205664	8721	83285	467	467	38	38	47.9	5.13	361879	1	1	0	706.746	2117.22	3	2117.21	0.0012	0	22.29	14	30	0.0081	R	IINEPTAAAIAYGLDK	K
2	Pavir.Ca02597.1.p|PACid:30205664	Pavir.Ca02597.1.p|PACid:30205664	8721	83285	467	467	38	38	47.9	5.13	361880	1	1	0	1059.62	2117.22	2	2117.21	0.0039	0	29.1	14	30	0.0019	R	IINEPTAAAIAYGLDK	K
2	Pavir.Ca02597.1.p|PACid:30205664	Pavir.Ca02597.1.p|PACid:30205664	8721	83285	467	467	38	38	47.9	5.13	362286	1	1	0	707.389	2119.14	3	2119.15	-0.0052	0	23.35	15	31	0.0074	K	NQVAMNPINTVFDAK	R
2	Pavir.Ca02597.1.p|PACid:30205664	Pavir.Ca02597.1.p|PACid:30205664	8721	83285	467	467	38	38	47.9	5.13	362287	1	1	0	530.794	2119.15	4	2119.15	-0.0049	0	43.96	20	31	0.00025	K	NQVAMNPINTVFDAK	R
2	Pavir.Ca02597.1.p|PACid:30205664	Pavir.Ca02597.1.p|PACid:30205664	8721	83285	467	467	38	38	47.9	5.13	362288	1	1	0	707.389	2119.15	3	2119.15	-0.0049	0	35.17	17	31	0.00085	K	NQVAMNPINTVFDAK	R
2	Pavir.Ca02597.1.p|PACid:30205664	Pavir.Ca02597.1.p|PACid:30205664	8721	83285	467	467	38	38	47.9	5.13	362290	1	1	0	1060.58	2119.15	2	2119.15	-0.0038	0	23.57	15	31	0.0074	K	NQVAMNPINTVFDAK	R
2	Pavir.Ca02597.1.p|PACid:30205664	Pavir.Ca02597.1.p|PACid:30205664	8721	83285	467	467	38	38	47.9	5.13	362291	1	1	0	1060.58	2119.15	2	2119.15	-0.0038	0	78.31	26	31	3.5e-07	K	NQVAMNPINTVFDAK	R
2	Pavir.Ca02597.1.p|PACid:30205664	Pavir.Ca02597.1.p|PACid:30205664	8721	83285	467	467	38	38	47.9	5.13	362292	1	1	0	707.389	2119.15	3	2119.15	-0.0038	0	46.41	22	31	0.0002	K	NQVAMNPINTVFDAK	R
2	Pavir.Ca02597.1.p|PACid:30205664	Pavir.Ca02597.1.p|PACid:30205664	8721	83285	467	467	38	38	47.9	5.13	362298	1	1	0	707.39	2119.15	3	2119.15	-0.0019	0	43.35	16	31	0.00011	K	NQVAMNPINTVFDAK	R
2	Pavir.Ca02597.1.p|PACid:30205664	Pavir.Ca02597.1.p|PACid:30205664	8721	83285	467	467	38	38	47.9	5.13	362299	1	1	0	707.39	2119.15	3	2119.15	-0.001	0	34.71	16	31	0.00083	K	NQVAMNPINTVFDAK	R
2	Pavir.Ca02597.1.p|PACid:30205664	Pavir.Ca02597.1.p|PACid:30205664	8721	83285	467	467	38	38	47.9	5.13	362304	1	1	0	1060.58	2119.15	2	2119.15	0.0011	0	63.1	24	31	7.4e-06	K	NQVAMNPINTVFDAK	R
2	Pavir.Ca02597.1.p|PACid:30205664	Pavir.Ca02597.1.p|PACid:30205664	8721	83285	467	467	38	38	47.9	5.13	362553	1	1	0	1061.08	2120.15	2	2120.13	0.0139	0	15.56	14	31	0.043	K	NQVAMNPINTVFDAK	R	Deamidated (NQ)	0.000000002000000.0
2	Pavir.Ca02597.1.p|PACid:30205664	Pavir.Ca02597.1.p|PACid:30205664	8721	83285	467	467	38	38	47.9	5.13	364072	1	1	0	532.549	2126.17	4	2126.17	-0.0045	2	28.3	15	31	0.0029	R	ARFEELNMDLFRK	C
2	Pavir.Ca02597.1.p|PACid:30205664	Pavir.Ca02597.1.p|PACid:30205664	8721	83285	467	467	38	38	47.9	5.13	364078	1	1	0	532.549	2126.17	4	2126.17	-0.0028	2	18.07	16	31	0.033	R	ARFEELNMDLFRK	C
2	Pavir.Ca02597.1.p|PACid:30205664	Pavir.Ca02597.1.p|PACid:30205664	8721	83285	467	467	38	38	47.9	5.13	364079	1	1	0	532.549	2126.17	4	2126.17	-0.0025	2	15.11	14	31	0.041	R	ARFEELNMDLFRK	C
2	Pavir.Ca02597.1.p|PACid:30205664	Pavir.Ca02597.1.p|PACid:30205664	8721	83285	467	467	38	38	47.9	5.13	364080	1	1	0	532.549	2126.17	4	2126.17	-0.0025	2	15.2	13	31	0.037	R	ARFEELNMDLFRK	C
2	Pavir.Ca02597.1.p|PACid:30205664	Pavir.Ca02597.1.p|PACid:30205664	8721	83285	467	467	38	38	47.9	5.13	366336	1	1	0	712.72	2135.14	3	2135.15	-0.0066	0	29.22	19	31	0.0048	K	NQVAMNPINTVFDAK	R	Oxidation (M)	0.000010000000000.0
2	Pavir.Ca02597.1.p|PACid:30205664	Pavir.Ca02597.1.p|PACid:30205664	8721	83285	467	467	38	38	47.9	5.13	366337	1	1	0	712.72	2135.14	3	2135.15	-0.0066	0	31.88	16	31	0.0014	K	NQVAMNPINTVFDAK	R	Oxidation (M)	0.000010000000000.0
2	Pavir.Ca02597.1.p|PACid:30205664	Pavir.Ca02597.1.p|PACid:30205664	8721	83285	467	467	38	38	47.9	5.13	366341	1	1	0	712.721	2135.14	3	2135.15	-0.005	0	23.95	15	31	0.0069	K	NQVAMNPINTVFDAK	R	Oxidation (M)	0.000010000000000.0
2	Pavir.Ca02597.1.p|PACid:30205664	Pavir.Ca02597.1.p|PACid:30205664	8721	83285	467	467	38	38	47.9	5.13	366346	1	1	0	1068.58	2135.14	2	2135.15	-0.0046	0	39.36	23	31	0.0013	K	NQVAMNPINTVFDAK	R	Oxidation (M)	0.000010000000000.0
2	Pavir.Ca02597.1.p|PACid:30205664	Pavir.Ca02597.1.p|PACid:30205664	8721	83285	467	467	38	38	47.9	5.13	366349	1	1	0	1068.58	2135.14	2	2135.15	-0.0043	0	20.31	14	31	0.012	K	NQVAMNPINTVFDAK	R	Oxidation (M)	0.000010000000000.0
2	Pavir.Ca02597.1.p|PACid:30205664	Pavir.Ca02597.1.p|PACid:30205664	8721	83285	467	467	38	38	47.9	5.13	366350	1	1	0	1068.58	2135.14	2	2135.15	-0.0041	0	31.25	15	31	0.0014	K	NQVAMNPINTVFDAK	R	Oxidation (M)	0.000010000000000.0
2	Pavir.Ca02597.1.p|PACid:30205664	Pavir.Ca02597.1.p|PACid:30205664	8721	83285	467	467	38	38	47.9	5.13	366353	1	1	0	1068.58	2135.14	2	2135.15	-0.0039	0	57.67	26	31	3.7e-05	K	NQVAMNPINTVFDAK	R	Oxidation (M)	0.000010000000000.0
2	Pavir.Ca02597.1.p|PACid:30205664	Pavir.Ca02597.1.p|PACid:30205664	8721	83285	467	467	38	38	47.9	5.13	366355	1	1	0	712.721	2135.14	3	2135.15	-0.0033	0	34.74	23	31	0.004	K	NQVAMNPINTVFDAK	R	Oxidation (M)	0.000010000000000.0
2	Pavir.Ca02597.1.p|PACid:30205664	Pavir.Ca02597.1.p|PACid:30205664	8721	83285	467	467	38	38	47.9	5.13	366357	1	1	0	1068.58	2135.14	2	2135.15	-0.0031	0	79.27		31	8.5e-07	K	NQVAMNPINTVFDAK	R	Oxidation (M)	0.000010000000000.0
2	Pavir.Ca02597.1.p|PACid:30205664	Pavir.Ca02597.1.p|PACid:30205664	8721	83285	467	467	38	38	47.9	5.13	366360	1	1	0	1068.58	2135.14	2	2135.15	-0.0029	0	57.53	27	31	5.1e-05	K	NQVAMNPINTVFDAK	R	Oxidation (M)	0.000010000000000.0
2	Pavir.Ca02597.1.p|PACid:30205664	Pavir.Ca02597.1.p|PACid:30205664	8721	83285	467	467	38	38	47.9	5.13	366361	1	1	0	712.721	2135.14	3	2135.15	-0.0028	0	51.4	18	31	2.8e-05	K	NQVAMNPINTVFDAK	R	Oxidation (M)	0.000010000000000.0
2	Pavir.Ca02597.1.p|PACid:30205664	Pavir.Ca02597.1.p|PACid:30205664	8721	83285	467	467	38	38	47.9	5.13	366362	1	1	0	712.721	2135.14	3	2135.15	-0.0028	0	24.99	15	31	0.0053	K	NQVAMNPINTVFDAK	R	Oxidation (M)	0.000010000000000.0
2	Pavir.Ca02597.1.p|PACid:30205664	Pavir.Ca02597.1.p|PACid:30205664	8721	83285	467	467	38	38	47.9	5.13	366363	1	1	0	712.721	2135.14	3	2135.15	-0.0028	0	28.6	14	31	0.0021	K	NQVAMNPINTVFDAK	R	Oxidation (M)	0.000010000000000.0
2	Pavir.Ca02597.1.p|PACid:30205664	Pavir.Ca02597.1.p|PACid:30205664	8721	83285	467	467	38	38	47.9	5.13	366365	1	1	0	712.721	2135.14	3	2135.15	-0.0024	0	19.51	17	31	0.034	K	NQVAMNPINTVFDAK	R	Oxidation (M)	0.000010000000000.0
2	Pavir.Ca02597.1.p|PACid:30205664	Pavir.Ca02597.1.p|PACid:30205664	8721	83285	467	467	38	38	47.9	5.13	366366	1	1	0	712.722	2135.14	3	2135.15	-0.0022	0	41.32	16	31	0.00017	K	NQVAMNPINTVFDAK	R	Oxidation (M)	0.000010000000000.0
2	Pavir.Ca02597.1.p|PACid:30205664	Pavir.Ca02597.1.p|PACid:30205664	8721	83285	467	467	38	38	47.9	5.13	366367	1	1	0	712.722	2135.14	3	2135.15	-0.0019	0	61.33	18	31	2.8e-06	K	NQVAMNPINTVFDAK	R	Oxidation (M)	0.000010000000000.0
2	Pavir.Ca02597.1.p|PACid:30205664	Pavir.Ca02597.1.p|PACid:30205664	8721	83285	467	467	38	38	47.9	5.13	366368	1	1	0	712.722	2135.14	3	2135.15	-0.0019	0	44.19	17	31	0.0001	K	NQVAMNPINTVFDAK	R	Oxidation (M)	0.000010000000000.0
2	Pavir.Ca02597.1.p|PACid:30205664	Pavir.Ca02597.1.p|PACid:30205664	8721	83285	467	467	38	38	47.9	5.13	366380	1	1	0	712.723	2135.15	3	2135.15	0.0009	0	39.13	15	31	0.00023	K	NQVAMNPINTVFDAK	R	Oxidation (M)	0.000010000000000.0
2	Pavir.Ca02597.1.p|PACid:30205664	Pavir.Ca02597.1.p|PACid:30205664	8721	83285	467	467	38	38	47.9	5.13	366382	1	1	0	712.723	2135.15	3	2135.15	0.0013	0	37.89	16	31	0.00037	K	NQVAMNPINTVFDAK	R	Oxidation (M)	0.000010000000000.0
2	Pavir.Ca02597.1.p|PACid:30205664	Pavir.Ca02597.1.p|PACid:30205664	8721	83285	467	467	38	38	47.9	5.13	366384	1	1	0	712.724	2135.15	3	2135.15	0.0049	0	23.32	16	31	0.011	K	NQVAMNPINTVFDAK	R	Oxidation (M)	0.000010000000000.0
2	Pavir.Ca02597.1.p|PACid:30205664	Pavir.Ca02597.1.p|PACid:30205664	8721	83285	467	467	38	38	47.9	5.13	366537	1	1	0	713.048	2136.12	3	2136.13	-0.0064	0	32.7	16	31	0.0012	K	NQVAMNPINTVFDAK	R	Oxidation (M); Deamidated (NQ)	0.020010000000000.0
2	Pavir.Ca02597.1.p|PACid:30205664	Pavir.Ca02597.1.p|PACid:30205664	8721	83285	467	467	38	38	47.9	5.13	366540	1	1	0	713.049	2136.12	3	2136.13	-0.005	0	22.86	14	31	0.0072	K	NQVAMNPINTVFDAK	R	Oxidation (M); Deamidated (NQ)	0.200010000000000.0
2	Pavir.Ca02597.1.p|PACid:30205664	Pavir.Ca02597.1.p|PACid:30205664	8721	83285	467	467	38	38	47.9	5.13	366545	1	1	0	713.049	2136.12	3	2136.13	-0.0041	0	37.39	16	31	0.00045	K	NQVAMNPINTVFDAK	R	Oxidation (M); Deamidated (NQ)	0.020010000000000.0
2	Pavir.Ca02597.1.p|PACid:30205664	Pavir.Ca02597.1.p|PACid:30205664	8721	83285	467	467	38	38	47.9	5.13	366546	1	1	0	713.049	2136.12	3	2136.13	-0.0041	0	27.56	17	31	0.0051	K	NQVAMNPINTVFDAK	R	Oxidation (M); Deamidated (NQ)	0.020010000000000.0
2	Pavir.Ca02597.1.p|PACid:30205664	Pavir.Ca02597.1.p|PACid:30205664	8721	83285	467	467	38	38	47.9	5.13	366548	1	1	0	1069.07	2136.13	2	2136.13	-0.0037	0	25.5	20	31	0.014	K	NQVAMNPINTVFDAK	R	Oxidation (M); Deamidated (NQ)	0.200010000000000.0
2	Pavir.Ca02597.1.p|PACid:30205664	Pavir.Ca02597.1.p|PACid:30205664	8721	83285	467	467	38	38	47.9	5.13	366551	1	1	0	1069.07	2136.13	2	2136.13	-0.0028	0	29.21	15	31	0.0023	K	NQVAMNPINTVFDAK	R	Oxidation (M); Deamidated (NQ)	0.200010000000000.0
2	Pavir.Ca02597.1.p|PACid:30205664	Pavir.Ca02597.1.p|PACid:30205664	8721	83285	467	467	38	38	47.9	5.13	366552	1	1	0	713.049	2136.13	3	2136.13	-0.0024	0	44.17	18	31	0.00012	K	NQVAMNPINTVFDAK	R	Oxidation (M); Deamidated (NQ)	0.020010000000000.0
2	Pavir.Ca02597.1.p|PACid:30205664	Pavir.Ca02597.1.p|PACid:30205664	8721	83285	467	467	38	38	47.9	5.13	366553	1	1	0	713.05	2136.13	3	2136.13	-0.0022	0	46.09	17	31	7e-05	K	NQVAMNPINTVFDAK	R	Oxidation (M); Deamidated (NQ)	0.200010000000000.0
2	Pavir.Ca02597.1.p|PACid:30205664	Pavir.Ca02597.1.p|PACid:30205664	8721	83285	467	467	38	38	47.9	5.13	366556	1	1	0	713.05	2136.13	3	2136.13	-0.0004	0	29.9	16	31	0.0022	K	NQVAMNPINTVFDAK	R	Oxidation (M); Deamidated (NQ)	0.200010000000000.0
2	Pavir.Ca02597.1.p|PACid:30205664	Pavir.Ca02597.1.p|PACid:30205664	8721	83285	467	467	38	38	47.9	5.13	366561	1	1	0	1069.07	2136.13	2	2136.13	0.0024	0	31.1	16	31	0.0018	K	NQVAMNPINTVFDAK	R	Oxidation (M); Deamidated (NQ)	0.020010000000000.0
2	Pavir.Ca02597.1.p|PACid:30205664	Pavir.Ca02597.1.p|PACid:30205664	8721	83285	467	467	38	38	47.9	5.13	366562	1	1	0	713.052	2136.13	3	2136.13	0.004	0	26.55	15	31	0.0037	K	NQVAMNPINTVFDAK	R	Oxidation (M); Deamidated (NQ)	0.200010000000000.0
2	Pavir.Ca02597.1.p|PACid:30205664	Pavir.Ca02597.1.p|PACid:30205664	8721	83285	467	467	38	38	47.9	5.13	366569	1	1	0	713.053	2136.14	3	2136.13	0.008	0	37.2	18	31	0.00071	K	NQVAMNPINTVFDAK	R	Oxidation (M); Deamidated (NQ)	0.200010000000000.0
2	Pavir.Ca02597.1.p|PACid:30205664	Pavir.Ca02597.1.p|PACid:30205664	8721	83285	467	467	38	38	47.9	5.13	395125	1	1	0	566.063	2260.22	4	2260.23	-0.0028	1	14.38	13	31	0.045	K	MDKSSVHDVVLVGGSTR	I	Oxidation (M)	0.10000000000000000.0
2	Pavir.Ca02597.1.p|PACid:30205664	Pavir.Ca02597.1.p|PACid:30205664	8721	83285	467	467	38	38	47.9	5.13	398389	1	1	0	759.423	2275.25	3	2275.25	-0.0042	1	38.59	15	31	0.00024	K	NQVAMNPINTVFDAKR	L
2	Pavir.Ca02597.1.p|PACid:30205664	Pavir.Ca02597.1.p|PACid:30205664	8721	83285	467	467	38	38	47.9	5.13	398394	1	1	0	759.423	2275.25	3	2275.25	-0.0027	1	52.99	16	31	1.1e-05	K	NQVAMNPINTVFDAKR	L
2	Pavir.Ca02597.1.p|PACid:30205664	Pavir.Ca02597.1.p|PACid:30205664	8721	83285	467	467	38	38	47.9	5.13	398397	1	1	0	759.424	2275.25	3	2275.25	-0.0009	1	43.05	15	31	9.2e-05	K	NQVAMNPINTVFDAKR	L
2	Pavir.Ca02597.1.p|PACid:30205664	Pavir.Ca02597.1.p|PACid:30205664	8721	83285	467	467	38	38	47.9	5.13	398621	1	1	0	759.751	2276.23	3	2276.24	-0.0029	1	14.18	13	31	0.047	K	NQVAMNPINTVFDAKR	L	Deamidated (NQ)	0.2000000000000000.0
2	Pavir.Ca02597.1.p|PACid:30205664	Pavir.Ca02597.1.p|PACid:30205664	8721	83285	467	467	38	38	47.9	5.13	401709	1	1	0	764.754	2291.24	3	2291.25	-0.0067	1	17.63	14	31	0.022	K	NQVAMNPINTVFDAKR	L	Oxidation (M)	0.0000100000000000.0
2	Pavir.Ca02597.1.p|PACid:30205664	Pavir.Ca02597.1.p|PACid:30205664	8721	83285	467	467	38	38	47.9	5.13	401717	1	1	0	764.755	2291.24	3	2291.25	-0.0041	1	33.97	16	31	0.00097	K	NQVAMNPINTVFDAKR	L	Oxidation (M)	0.0000100000000000.0
2	Pavir.Ca02597.1.p|PACid:30205664	Pavir.Ca02597.1.p|PACid:30205664	8721	83285	467	467	38	38	47.9	5.13	401718	1	1	0	573.818	2291.24	4	2291.25	-0.0038	1	40.33	22	31	0.00081	K	NQVAMNPINTVFDAKR	L	Oxidation (M)	0.0000100000000000.0
2	Pavir.Ca02597.1.p|PACid:30205664	Pavir.Ca02597.1.p|PACid:30205664	8721	83285	467	467	38	38	47.9	5.13	401720	1	1	0	764.755	2291.24	3	2291.25	-0.0035	1	49.96	17	31	2.7e-05	K	NQVAMNPINTVFDAKR	L	Oxidation (M)	0.0000100000000000.0
2	Pavir.Ca02597.1.p|PACid:30205664	Pavir.Ca02597.1.p|PACid:30205664	8721	83285	467	467	38	38	47.9	5.13	401721	1	1	0	764.755	2291.24	3	2291.25	-0.003	1	23.89	14	31	0.0057	K	NQVAMNPINTVFDAKR	L	Oxidation (M)	0.0000100000000000.0
2	Pavir.Ca02597.1.p|PACid:30205664	Pavir.Ca02597.1.p|PACid:30205664	8721	83285	467	467	38	38	47.9	5.13	401929	1	1	0	765.083	2292.23	3	2292.23	-0.0039	1	29.19	14	31	0.0018	K	NQVAMNPINTVFDAKR	L	Oxidation (M); Deamidated (NQ)	0.0200100000000000.0
2	Pavir.Ca02597.1.p|PACid:30205664	Pavir.Ca02597.1.p|PACid:30205664	8721	83285	467	467	38	38	47.9	5.13	401932	1	1	0	765.083	2292.23	3	2292.23	-0.0035	1	31.2	14	31	0.0012	K	NQVAMNPINTVFDAKR	L	Oxidation (M); Deamidated (NQ)	0.0000100020000000.0
2	Pavir.Ca02597.1.p|PACid:30205664	Pavir.Ca02597.1.p|PACid:30205664	8721	83285	467	467	38	38	47.9	5.13	401934	1	1	0	765.083	2292.23	3	2292.23	-0.0021	1	27.65	16	31	0.0038	K	NQVAMNPINTVFDAKR	L	Oxidation (M); Deamidated (NQ)	0.2000100000000000.0
2	Pavir.Ca02597.1.p|PACid:30205664	Pavir.Ca02597.1.p|PACid:30205664	8721	83285	467	467	38	38	47.9	5.13	402140	1	1	0	765.416	2293.23	3	2293.21	0.0109	1	14.71	13	31	0.042	K	NQVAMNPINTVFDAKR	L	Oxidation (M); 2 Deamidated (NQ)	0.0000120020000000.0
2	Pavir.Ca02597.1.p|PACid:30205664	Pavir.Ca02597.1.p|PACid:30205664	8721	83285	467	467	38	38	47.9	5.13	426612	1	1	0	606.366	2421.43	4	2421.44	-0.0041	0	16.54	14	28	0.028	K	VISGPGEKPMIVVQHK	G	Oxidation (M)	0.0000000001000000.0
2	Pavir.Ca02597.1.p|PACid:30205664	Pavir.Ca02597.1.p|PACid:30205664	8721	83285	467	467	38	38	47.9	5.13	435428	1	1	0	825.828	2474.46	3	2474.47	-0.0091	1	15.34	13	28	0.036	R	IINEPTAAAIAYGLDKK	A
2	Pavir.Ca02597.1.p|PACid:30205664	Pavir.Ca02597.1.p|PACid:30205664	8721	83285	467	467	38	38	47.9	5.13	435430	1	1	0	619.623	2474.46	4	2474.47	-0.0078	1	32.41	15	28	0.00091	R	IINEPTAAAIAYGLDKK	A
2	Pavir.Ca02597.1.p|PACid:30205664	Pavir.Ca02597.1.p|PACid:30205664	8721	83285	467	467	38	38	47.9	5.13	435440	1	1	0	825.829	2474.47	3	2474.47	-0.0062	1	20.95	14	28	0.011	R	IINEPTAAAIAYGLDKK	A
2	Pavir.Ca02597.1.p|PACid:30205664	Pavir.Ca02597.1.p|PACid:30205664	8721	83285	467	467	38	38	47.9	5.13	435441	1	1	0	619.624	2474.47	4	2474.47	-0.0061	1	53.72	16	28	9.2e-06	R	IINEPTAAAIAYGLDKK	A
2	Pavir.Ca02597.1.p|PACid:30205664	Pavir.Ca02597.1.p|PACid:30205664	8721	83285	467	467	38	38	47.9	5.13	435445	1	1	0	825.829	2474.47	3	2474.47	-0.0058	1	33.56	15	28	0.00071	R	IINEPTAAAIAYGLDKK	A
2	Pavir.Ca02597.1.p|PACid:30205664	Pavir.Ca02597.1.p|PACid:30205664	8721	83285	467	467	38	38	47.9	5.13	435449	1	1	0	619.624	2474.47	4	2474.47	-0.0056	1	27.88	14	28	0.0024	R	IINEPTAAAIAYGLDKK	A
2	Pavir.Ca02597.1.p|PACid:30205664	Pavir.Ca02597.1.p|PACid:30205664	8721	83285	467	467	38	38	47.9	5.13	435453	1	1	0	619.624	2474.47	4	2474.47	-0.0052	1	38.03	15	28	0.00027	R	IINEPTAAAIAYGLDKK	A
2	Pavir.Ca02597.1.p|PACid:30205664	Pavir.Ca02597.1.p|PACid:30205664	8721	83285	467	467	38	38	47.9	5.13	435455	1	1	0	825.83	2474.47	3	2474.47	-0.0051	1	19.72	14	28	0.014	R	IINEPTAAAIAYGLDKK	A
2	Pavir.Ca02597.1.p|PACid:30205664	Pavir.Ca02597.1.p|PACid:30205664	8721	83285	467	467	38	38	47.9	5.13	435459	1	1	0	825.83	2474.47	3	2474.47	-0.0049	1	14.94	13	28	0.04	R	IINEPTAAAIAYGLDKK	A
2	Pavir.Ca02597.1.p|PACid:30205664	Pavir.Ca02597.1.p|PACid:30205664	8721	83285	467	467	38	38	47.9	5.13	435461	1	1	0	825.83	2474.47	3	2474.47	-0.0049	1	41.26	15	28	0.00014	R	IINEPTAAAIAYGLDKK	A
2	Pavir.Ca02597.1.p|PACid:30205664	Pavir.Ca02597.1.p|PACid:30205664	8721	83285	467	467	38	38	47.9	5.13	435463	1	1	0	619.624	2474.47	4	2474.47	-0.0047	1	36.98	15	28	0.00034	R	IINEPTAAAIAYGLDKK	A
2	Pavir.Ca02597.1.p|PACid:30205664	Pavir.Ca02597.1.p|PACid:30205664	8721	83285	467	467	38	38	47.9	5.13	435466	1	1	0	825.83	2474.47	3	2474.47	-0.0045	1	32.95	15	28	0.00081	R	IINEPTAAAIAYGLDKK	A
2	Pavir.Ca02597.1.p|PACid:30205664	Pavir.Ca02597.1.p|PACid:30205664	8721	83285	467	467	38	38	47.9	5.13	435467	1	1	0	825.83	2474.47	3	2474.47	-0.0045	1	46.9	15	28	4e-05	R	IINEPTAAAIAYGLDKK	A
2	Pavir.Ca02597.1.p|PACid:30205664	Pavir.Ca02597.1.p|PACid:30205664	8721	83285	467	467	38	38	47.9	5.13	435472	1	1	0	825.83	2474.47	3	2474.47	-0.0042	1	43.51	15	28	8.3e-05	R	IINEPTAAAIAYGLDKK	A
2	Pavir.Ca02597.1.p|PACid:30205664	Pavir.Ca02597.1.p|PACid:30205664	8721	83285	467	467	38	38	47.9	5.13	435473	1	1	0	619.624	2474.47	4	2474.47	-0.0042	1	29.05	14	28	0.0019	R	IINEPTAAAIAYGLDKK	A
2	Pavir.Ca02597.1.p|PACid:30205664	Pavir.Ca02597.1.p|PACid:30205664	8721	83285	467	467	38	38	47.9	5.13	435474	1	1	0	619.624	2474.47	4	2474.47	-0.0042	1	27.75	14	28	0.0025	R	IINEPTAAAIAYGLDKK	A
2	Pavir.Ca02597.1.p|PACid:30205664	Pavir.Ca02597.1.p|PACid:30205664	8721	83285	467	467	38	38	47.9	5.13	435477	1	1	0	619.624	2474.47	4	2474.47	-0.0039	1	28.17	18	28	0.0051	R	IINEPTAAAIAYGLDKK	A
2	Pavir.Ca02597.1.p|PACid:30205664	Pavir.Ca02597.1.p|PACid:30205664	8721	83285	467	467	38	38	47.9	5.13	435481	1	1	0	825.83	2474.47	3	2474.47	-0.0038	1	17.3	14	28	0.024	R	IINEPTAAAIAYGLDKK	A
2	Pavir.Ca02597.1.p|PACid:30205664	Pavir.Ca02597.1.p|PACid:30205664	8721	83285	467	467	38	38	47.9	5.13	435483	1	1	0	825.83	2474.47	3	2474.47	-0.0038	1	29.77	14	28	0.0016	R	IINEPTAAAIAYGLDKK	A
2	Pavir.Ca02597.1.p|PACid:30205664	Pavir.Ca02597.1.p|PACid:30205664	8721	83285	467	467	38	38	47.9	5.13	435486	1	1	0	825.83	2474.47	3	2474.47	-0.0036	1	21.24	14	28	0.01	R	IINEPTAAAIAYGLDKK	A
2	Pavir.Ca02597.1.p|PACid:30205664	Pavir.Ca02597.1.p|PACid:30205664	8721	83285	467	467	38	38	47.9	5.13	435487	1	1	0	619.624	2474.47	4	2474.47	-0.0034	1	26.6	14	28	0.0032	R	IINEPTAAAIAYGLDKK	A
2	Pavir.Ca02597.1.p|PACid:30205664	Pavir.Ca02597.1.p|PACid:30205664	8721	83285	467	467	38	38	47.9	5.13	435488	1	1	0	619.624	2474.47	4	2474.47	-0.0034	1	26.32	14	28	0.0034	R	IINEPTAAAIAYGLDKK	A
2	Pavir.Ca02597.1.p|PACid:30205664	Pavir.Ca02597.1.p|PACid:30205664	8721	83285	467	467	38	38	47.9	5.13	435490	1	1	0	825.83	2474.47	3	2474.47	-0.0034	1	26.97	16	28	0.0041	R	IINEPTAAAIAYGLDKK	A
2	Pavir.Ca02597.1.p|PACid:30205664	Pavir.Ca02597.1.p|PACid:30205664	8721	83285	467	467	38	38	47.9	5.13	435491	1	1	0	825.83	2474.47	3	2474.47	-0.0034	1	43.75	15	28	7.9e-05	R	IINEPTAAAIAYGLDKK	A
2	Pavir.Ca02597.1.p|PACid:30205664	Pavir.Ca02597.1.p|PACid:30205664	8721	83285	467	467	38	38	47.9	5.13	435492	1	1	0	825.83	2474.47	3	2474.47	-0.0034	1	39.54	15	28	0.0002	R	IINEPTAAAIAYGLDKK	A
2	Pavir.Ca02597.1.p|PACid:30205664	Pavir.Ca02597.1.p|PACid:30205664	8721	83285	467	467	38	38	47.9	5.13	435495	1	1	0	825.83	2474.47	3	2474.47	-0.0032	1	38.87	15	28	0.00023	R	IINEPTAAAIAYGLDKK	A
2	Pavir.Ca02597.1.p|PACid:30205664	Pavir.Ca02597.1.p|PACid:30205664	8721	83285	467	467	38	38	47.9	5.13	435496	1	1	0	825.83	2474.47	3	2474.47	-0.0032	1	38.05	15	28	0.00027	R	IINEPTAAAIAYGLDKK	A
2	Pavir.Ca02597.1.p|PACid:30205664	Pavir.Ca02597.1.p|PACid:30205664	8721	83285	467	467	38	38	47.9	5.13	435497	1	1	0	825.83	2474.47	3	2474.47	-0.0032	1	36.55	15	28	0.00037	R	IINEPTAAAIAYGLDKK	A
2	Pavir.Ca02597.1.p|PACid:30205664	Pavir.Ca02597.1.p|PACid:30205664	8721	83285	467	467	38	38	47.9	5.13	435498	1	1	0	825.83	2474.47	3	2474.47	-0.0032	1	45.77	15	28	5.1e-05	R	IINEPTAAAIAYGLDKK	A
2	Pavir.Ca02597.1.p|PACid:30205664	Pavir.Ca02597.1.p|PACid:30205664	8721	83285	467	467	38	38	47.9	5.13	435499	1	1	0	619.624	2474.47	4	2474.47	-0.0032	1	28.35	14	28	0.0022	R	IINEPTAAAIAYGLDKK	A
2	Pavir.Ca02597.1.p|PACid:30205664	Pavir.Ca02597.1.p|PACid:30205664	8721	83285	467	467	38	38	47.9	5.13	435502	1	1	0	619.625	2474.47	4	2474.47	-0.003	1	26.76	14	28	0.0031	R	IINEPTAAAIAYGLDKK	A
2	Pavir.Ca02597.1.p|PACid:30205664	Pavir.Ca02597.1.p|PACid:30205664	8721	83285	467	467	38	38	47.9	5.13	435505	1	1	0	825.83	2474.47	3	2474.47	-0.0027	1	46.57	15	28	4.3e-05	R	IINEPTAAAIAYGLDKK	A
2	Pavir.Ca02597.1.p|PACid:30205664	Pavir.Ca02597.1.p|PACid:30205664	8721	83285	467	467	38	38	47.9	5.13	435507	1	1	0	619.625	2474.47	4	2474.47	-0.0025	1	34.8	15	28	0.00055	R	IINEPTAAAIAYGLDKK	A
2	Pavir.Ca02597.1.p|PACid:30205664	Pavir.Ca02597.1.p|PACid:30205664	8721	83285	467	467	38	38	47.9	5.13	435509	1	1	0	619.625	2474.47	4	2474.47	-0.0022	1	35.04	15	28	0.00052	R	IINEPTAAAIAYGLDKK	A
2	Pavir.Ca02597.1.p|PACid:30205664	Pavir.Ca02597.1.p|PACid:30205664	8721	83285	467	467	38	38	47.9	5.13	435510	1	1	0	619.625	2474.47	4	2474.47	-0.0022	1	27.76	14	28	0.0025	R	IINEPTAAAIAYGLDKK	A
2	Pavir.Ca02597.1.p|PACid:30205664	Pavir.Ca02597.1.p|PACid:30205664	8721	83285	467	467	38	38	47.9	5.13	435511	1	1	0	619.625	2474.47	4	2474.47	-0.0022	1	27	17	28	0.0056	R	IINEPTAAAIAYGLDKK	A
2	Pavir.Ca02597.1.p|PACid:30205664	Pavir.Ca02597.1.p|PACid:30205664	8721	83285	467	467	38	38	47.9	5.13	435513	1	1	0	825.831	2474.47	3	2474.47	-0.002	1	33.71	15	28	0.00069	R	IINEPTAAAIAYGLDKK	A
2	Pavir.Ca02597.1.p|PACid:30205664	Pavir.Ca02597.1.p|PACid:30205664	8721	83285	467	467	38	38	47.9	5.13	435524	1	1	0	619.625	2474.47	4	2474.47	-0.0005	1	32.03	15	28	0.0011	R	IINEPTAAAIAYGLDKK	A
2	Pavir.Ca02597.1.p|PACid:30205664	Pavir.Ca02597.1.p|PACid:30205664	8721	83285	467	467	38	38	47.9	5.13	435674	1	1	0	619.874	2475.47	4	2475.46	0.0128	1	21.74	14	28	0.0091	R	IINEPTAAAIAYGLDKK	A	Deamidated (NQ)	0.00200000000000000.0
2	Pavir.Ca02597.1.p|PACid:30205664	Pavir.Ca02597.1.p|PACid:30205664	8721	83285	467	467	38	38	47.9	5.13	435701	1	1	0	619.875	2475.47	4	2475.46	0.0174	1	14.66	13	28	0.042	R	IINEPTAAAIAYGLDKK	A	Deamidated (NQ)	0.00200000000000000.0
2	Pavir.Ca02597.1.p|PACid:30205664	Pavir.Ca02597.1.p|PACid:30205664	8721	83285	467	467	38	38	47.9	5.13	507468	1	1	0	755.426	3017.68	4	3017.68	-0.0066	1	15.65	13	31	0.034	R	LIGDAAKNQVAMNPINTVFDAK	R	Deamidated (NQ)	0.0000000200000000000000.0
2	Pavir.Ca02597.1.p|PACid:30205664	Pavir.Ca02597.1.p|PACid:30205664	8721	83285	467	467	38	38	47.9	5.13	507469	1	1	0	1006.9	3017.68	3	3017.68	-0.0055	1	20.88	15	31	0.014	R	LIGDAAKNQVAMNPINTVFDAK	R	Deamidated (NQ)	0.0000000200000000000000.0
2	Pavir.Ca02597.1.p|PACid:30205664	Pavir.Ca02597.1.p|PACid:30205664	8721	83285	467	467	38	38	47.9	5.13	507470	1	1	0	755.427	3017.68	4	3017.68	-0.0049	1	39.8	17	30	0.00031	R	LIGDAAKNQVAMNPINTVFDAK	R	Deamidated (NQ)	0.0000000200000000000000.0
2	Pavir.Ca02597.1.p|PACid:30205664	Pavir.Ca02597.1.p|PACid:30205664	8721	83285	467	467	38	38	47.9	5.13	508573	1	1	0	1012.23	3033.67	3	3033.68	-0.0059	1	22.25	14	31	0.0082	R	LIGDAAKNQVAMNPINTVFDAK	R	Oxidation (M); Deamidated (NQ)	0.0000000200010000000000.0
2	Pavir.Ca02597.1.p|PACid:30205664	Pavir.Ca02597.1.p|PACid:30205664	8721	83285	467	467	38	38	47.9	5.13	508575	1	1	0	759.426	3033.67	4	3033.68	-0.0047	1	39.8	18	31	0.00034	R	LIGDAAKNQVAMNPINTVFDAK	R	Oxidation (M); Deamidated (NQ)	0.0000000200010000000000.0
2	Pavir.Ca02597.1.p|PACid:30205664	Pavir.Ca02597.1.p|PACid:30205664	8721	83285	467	467	38	38	47.9	5.13	508579	1	1	0	759.426	3033.67	4	3033.68	-0.0035	1	29.27	14	31	0.0018	R	LIGDAAKNQVAMNPINTVFDAK	R	Oxidation (M); Deamidated (NQ)	0.0000000200010000000000.0
2	Pavir.Ca02597.1.p|PACid:30205664	Pavir.Ca02597.1.p|PACid:30205664	8721	83285	467	467	38	38	47.9	5.13	513921	1	1	0	1033.14	3096.39	3	3096.4	-0.0076	0	55.76	16	25	5.9e-06	K	MYQGAGADMGGAAGMDEDAPAGSGGPGPK	I	Oxidation (M)	0.00000000000000100000000000000.0
2	Pavir.Ca02597.1.p|PACid:30205664	Pavir.Ca02597.1.p|PACid:30205664	8721	83285	467	467	38	38	47.9	5.13	514005	1	1	0	1033.47	3097.4	3	3097.38	0.0176	0	35.65	15	25	0.00045	K	MYQGAGADMGGAAGMDEDAPAGSGGPGPK	I	Oxidation (M); Deamidated (NQ)	0.10200000000000000000000000000.0
2	Pavir.Ca02597.1.p|PACid:30205664	Pavir.Ca02597.1.p|PACid:30205664	8721	83285	467	467	38	38	47.9	5.13	515542	1	1	0	1038.47	3112.38	3	3112.39	-0.0098	0	29.29	14	24	0.0018	K	MYQGAGADMGGAAGMDEDAPAGSGGPGPK	I	2 Oxidation (M)	0.00000000100000100000000000000.0
2	Pavir.Ca02597.1.p|PACid:30205664	Pavir.Ca02597.1.p|PACid:30205664	8721	83285	467	467	38	38	47.9	5.13	515543	1	1	0	1038.47	3112.39	3	3112.39	-0.0087	0	39.59	15	24	0.00019	K	MYQGAGADMGGAAGMDEDAPAGSGGPGPK	I	2 Oxidation (M)	0.00000000100000100000000000000.0
2	Pavir.Ca02597.1.p|PACid:30205664	Pavir.Ca02597.1.p|PACid:30205664	8721	83285	467	467	38	38	47.9	5.13	515545	1	1	0	1038.47	3112.39	3	3112.39	-0.0076	0	31.54	14	24	0.0011	K	MYQGAGADMGGAAGMDEDAPAGSGGPGPK	I	2 Oxidation (M)	0.10000000000000100000000000000.0
2	Pavir.Ca02597.1.p|PACid:30205664	Pavir.Ca02597.1.p|PACid:30205664	8721	83285	467	467	38	38	47.9	5.13	515558	1	1	0	1038.47	3112.39	3	3112.39	-0.0054	0	37.24	15	24	0.00032	K	MYQGAGADMGGAAGMDEDAPAGSGGPGPK	I	2 Oxidation (M)	0.00000000100000100000000000000.0
2	Pavir.Ca02597.1.p|PACid:30205664	Pavir.Ca02597.1.p|PACid:30205664	8721	83285	467	467	38	38	47.9	5.13	515560	1	1	0	779.105	3112.39	4	3112.39	-0.0053	0	14.8	13	24	0.041	K	MYQGAGADMGGAAGMDEDAPAGSGGPGPK	I	2 Oxidation (M)	0.10000000000000100000000000000.0
2	Pavir.Ca02597.1.p|PACid:30205664	Pavir.Ca02597.1.p|PACid:30205664	8721	83285	467	467	38	38	47.9	5.13	515561	1	1	0	1038.47	3112.39	3	3112.39	-0.0046	0	59.51	16	24	2.6e-06	K	MYQGAGADMGGAAGMDEDAPAGSGGPGPK	I	2 Oxidation (M)	0.10000000000000100000000000000.0
2	Pavir.Ca02597.1.p|PACid:30205664	Pavir.Ca02597.1.p|PACid:30205664	8721	83285	467	467	38	38	47.9	5.13	515567	1	1	0	779.105	3112.39	4	3112.39	-0.0021	0	39.19	15	25	0.00021	K	MYQGAGADMGGAAGMDEDAPAGSGGPGPK	I	2 Oxidation (M)	0.00000000100000100000000000000.0
2	Pavir.Ca02597.1.p|PACid:30205664	Pavir.Ca02597.1.p|PACid:30205664	8721	83285	467	467	38	38	47.9	5.13	515568	1	1	0	1038.47	3112.39	3	3112.39	-0.0017	0	31.13	14	25	0.0012	K	MYQGAGADMGGAAGMDEDAPAGSGGPGPK	I	2 Oxidation (M)	0.00000000100000100000000000000.0
2	Pavir.Ca02597.1.p|PACid:30205664	Pavir.Ca02597.1.p|PACid:30205664	8721	83285	467	467	38	38	47.9	5.13	515570	1	1	0	1038.48	3112.4	3	3112.39	0.0104	0	16.86	14	26	0.026	K	MYQGAGADMGGAAGMDEDAPAGSGGPGPK	I	2 Oxidation (M)	0.10000000100000000000000000000.0
2	Pavir.Ca02597.1.p|PACid:30205664	Pavir.Ca02597.1.p|PACid:30205664	8721	83285	467	467	38	38	47.9	5.13	515613	1	1	0	1038.8	3113.38	3	3113.38	0.0063	0	37.45	15	24	0.00031	K	MYQGAGADMGGAAGMDEDAPAGSGGPGPK	I	2 Oxidation (M); Deamidated (NQ)	0.00200000100000100000000000000.0
2	Pavir.Ca02597.1.p|PACid:30205664	Pavir.Ca02597.1.p|PACid:30205664	8721	83285	467	467	38	38	47.9	5.13	515614	1	1	0	1038.8	3113.38	3	3113.38	0.0063	0	30.34	14	24	0.0014	K	MYQGAGADMGGAAGMDEDAPAGSGGPGPK	I	2 Oxidation (M); Deamidated (NQ)	0.00200000100000100000000000000.0
2	Pavir.Ca02597.1.p|PACid:30205664	Pavir.Ca02597.1.p|PACid:30205664	8721	83285	467	467	38	38	47.9	5.13	515617	1	1	0	1038.8	3113.39	3	3113.38	0.0118	0	21.81	14	24	0.009	K	MYQGAGADMGGAAGMDEDAPAGSGGPGPK	I	2 Oxidation (M); Deamidated (NQ)	0.10200000000000100000000000000.0
2	Pavir.Ca02597.1.p|PACid:30205664	Pavir.Ca02597.1.p|PACid:30205664	8721	83285	467	467	38	38	47.9	5.13	515618	1	1	0	1038.8	3113.39	3	3113.38	0.0122	0	29.11	14	24	0.0019	K	MYQGAGADMGGAAGMDEDAPAGSGGPGPK	I	2 Oxidation (M); Deamidated (NQ)	0.00200000100000100000000000000.0
2	Pavir.Ca02597.1.p|PACid:30205664	Pavir.Ca02597.1.p|PACid:30205664	8721	83285	467	467	38	38	47.9	5.13	515620	1	1	0	1038.8	3113.39	3	3113.38	0.0126	0	54.08	16	24	8.5e-06	K	MYQGAGADMGGAAGMDEDAPAGSGGPGPK	I	2 Oxidation (M); Deamidated (NQ)	0.00200000100000100000000000000.0
2	Pavir.Ca02597.1.p|PACid:30205664	Pavir.Ca02597.1.p|PACid:30205664	8721	83285	467	467	38	38	47.9	5.13	515624	1	1	0	1038.8	3113.39	3	3113.38	0.0137	0	27.72	14	24	0.0025	K	MYQGAGADMGGAAGMDEDAPAGSGGPGPK	I	2 Oxidation (M); Deamidated (NQ)	0.00200000100000100000000000000.0
2	Pavir.Ca02597.1.p|PACid:30205664	Pavir.Ca02597.1.p|PACid:30205664	8721	83285	467	467	38	38	47.9	5.13	515626	1	1	0	1038.8	3113.39	3	3113.38	0.0144	0	19.34	14	24	0.015	K	MYQGAGADMGGAAGMDEDAPAGSGGPGPK	I	2 Oxidation (M); Deamidated (NQ)	0.00200000100000100000000000000.0
2	Pavir.Ca02597.1.p|PACid:30205664	Pavir.Ca02597.1.p|PACid:30205664	8721	83285	467	467	38	38	47.9	5.13	515628	1	1	0	1038.8	3113.39	3	3113.38	0.0148	0	25.37	14	24	0.0042	K	MYQGAGADMGGAAGMDEDAPAGSGGPGPK	I	2 Oxidation (M); Deamidated (NQ)	0.00200000100000100000000000000.0
2	Pavir.Ca02597.1.p|PACid:30205664	Pavir.Ca02597.1.p|PACid:30205664	8721	83285	467	467	38	38	47.9	5.13	516950	1	1	0	783.102	3128.38	4	3128.39	-0.0112	0	54.13	16	23	8.4e-06	K	MYQGAGADMGGAAGMDEDAPAGSGGPGPK	I	3 Oxidation (M)	0.10000000100000100000000000000.0
2	Pavir.Ca02597.1.p|PACid:30205664	Pavir.Ca02597.1.p|PACid:30205664	8721	83285	467	467	38	38	47.9	5.13	516951	1	1	0	1043.8	3128.38	3	3128.39	-0.0097	0	33.73	15	23	0.00069	K	MYQGAGADMGGAAGMDEDAPAGSGGPGPK	I	3 Oxidation (M)	0.10000000100000100000000000000.0
2	Pavir.Ca02597.1.p|PACid:30205664	Pavir.Ca02597.1.p|PACid:30205664	8721	83285	467	467	38	38	47.9	5.13	516953	1	1	0	1043.8	3128.38	3	3128.39	-0.0086	0	64.84	17	23	8.3e-07	K	MYQGAGADMGGAAGMDEDAPAGSGGPGPK	I	3 Oxidation (M)	0.10000000100000100000000000000.0
2	Pavir.Ca02597.1.p|PACid:30205664	Pavir.Ca02597.1.p|PACid:30205664	8721	83285	467	467	38	38	47.9	5.13	516954	1	1	0	1043.8	3128.38	3	3128.39	-0.0082	0	19.52	14	23	0.015	K	MYQGAGADMGGAAGMDEDAPAGSGGPGPK	I	3 Oxidation (M)	0.10000000100000100000000000000.0
2	Pavir.Ca02597.1.p|PACid:30205664	Pavir.Ca02597.1.p|PACid:30205664	8721	83285	467	467	38	38	47.9	5.13	516955	1	1	0	1043.8	3128.38	3	3128.39	-0.0068	0	44.21	15	23	7.1e-05	K	MYQGAGADMGGAAGMDEDAPAGSGGPGPK	I	3 Oxidation (M)	0.10000000100000100000000000000.0
2	Pavir.Ca02597.1.p|PACid:30205664	Pavir.Ca02597.1.p|PACid:30205664	8721	83285	467	467	38	38	47.9	5.13	516957	1	1	0	783.104	3128.39	4	3128.39	-0.0039	0	62.27	16	23	1.4e-06	K	MYQGAGADMGGAAGMDEDAPAGSGGPGPK	I	3 Oxidation (M)	0.10000000100000100000000000000.0
2	Pavir.Ca02597.1.p|PACid:30205664	Pavir.Ca02597.1.p|PACid:30205664	8721	83285	467	467	38	38	47.9	5.13	516958	1	1	0	783.104	3128.39	4	3128.39	-0.0037	0	30.73	14	23	0.0013	K	MYQGAGADMGGAAGMDEDAPAGSGGPGPK	I	3 Oxidation (M)	0.10000000100000100000000000000.0
2	Pavir.Ca02597.1.p|PACid:30205664	Pavir.Ca02597.1.p|PACid:30205664	8721	83285	467	467	38	38	47.9	5.13	516959	1	1	0	783.104	3128.39	4	3128.39	-0.0029	0	25.74	14	24	0.0039	K	MYQGAGADMGGAAGMDEDAPAGSGGPGPK	I	3 Oxidation (M)	0.10000000100000100000000000000.0
2	Pavir.Ca02597.1.p|PACid:30205664	Pavir.Ca02597.1.p|PACid:30205664	8721	83285	467	467	38	38	47.9	5.13	516960	1	1	0	1043.8	3128.39	3	3128.39	-0.0009	0	42.55	15	24	0.0001	K	MYQGAGADMGGAAGMDEDAPAGSGGPGPK	I	3 Oxidation (M)	0.10000000100000100000000000000.0
2	Pavir.Ca02597.1.p|PACid:30205664	Pavir.Ca02597.1.p|PACid:30205664	8721	83285	467	467	38	38	47.9	5.13	516961	1	1	0	783.105	3128.39	4	3128.39	-0.0003	0	84.86	22	24	3.2e-08	K	MYQGAGADMGGAAGMDEDAPAGSGGPGPK	I	3 Oxidation (M)	0.10000000100000100000000000000.0
2	Pavir.Ca02597.1.p|PACid:30205664	Pavir.Ca02597.1.p|PACid:30205664	8721	83285	467	467	38	38	47.9	5.13	516963	1	1	0	1043.81	3128.4	3	3128.39	0.0112	0	28.58	14	24	0.0021	K	MYQGAGADMGGAAGMDEDAPAGSGGPGPK	I	3 Oxidation (M)	0.10000000100000100000000000000.0
2	Pavir.Ca02597.1.p|PACid:30205664	Pavir.Ca02597.1.p|PACid:30205664	8721	83285	467	467	38	38	47.9	5.13	516964	1	1	0	1043.81	3128.4	3	3128.39	0.0119	0	19.6	16	24	0.023	K	MYQGAGADMGGAAGMDEDAPAGSGGPGPK	I	3 Oxidation (M)	0.10000000100000100000000000000.0
2	Pavir.Ca02597.1.p|PACid:30205664	Pavir.Ca02597.1.p|PACid:30205664	8721	83285	467	467	38	38	47.9	5.13	516965	1	1	0	783.108	3128.4	4	3128.39	0.0146	0	17.06	14	24	0.025	K	MYQGAGADMGGAAGMDEDAPAGSGGPGPK	I	3 Oxidation (M)	0.10000000100000100000000000000.0
2	Pavir.Ca02597.1.p|PACid:30205664	Pavir.Ca02597.1.p|PACid:30205664	8721	83285	467	467	38	38	47.9	5.13	517026	1	1	0	1044.13	3129.38	3	3129.37	0.0082	0	49.98	16	23	2.1e-05	K	MYQGAGADMGGAAGMDEDAPAGSGGPGPK	I	3 Oxidation (M); Deamidated (NQ)	0.10200000100000100000000000000.0
2	Pavir.Ca02597.1.p|PACid:30205664	Pavir.Ca02597.1.p|PACid:30205664	8721	83285	467	467	38	38	47.9	5.13	517027	1	1	0	1044.14	3129.38	3	3129.37	0.0115	0	34.94	15	23	0.00053	K	MYQGAGADMGGAAGMDEDAPAGSGGPGPK	I	3 Oxidation (M); Deamidated (NQ)	0.10200000100000100000000000000.0
2	Pavir.Ca02597.1.p|PACid:30205664	Pavir.Ca02597.1.p|PACid:30205664	8721	83285	467	467	38	38	47.9	5.13	517028	1	1	0	783.354	3129.39	4	3129.37	0.015	0	41.77	15	24	0.00012	K	MYQGAGADMGGAAGMDEDAPAGSGGPGPK	I	3 Oxidation (M); Deamidated (NQ)	0.10200000100000100000000000000.0
2	Pavir.Ca02597.1.p|PACid:30205664	Pavir.Ca02597.1.p|PACid:30205664	8721	83285	467	467	38	38	47.9	5.13	517029	1	1	0	1044.14	3129.39	3	3129.37	0.0152	0	29.23	14	24	0.0018	K	MYQGAGADMGGAAGMDEDAPAGSGGPGPK	I	3 Oxidation (M); Deamidated (NQ)	0.10200000100000100000000000000.0
2	Pavir.Ca02597.1.p|PACid:30205664	Pavir.Ca02597.1.p|PACid:30205664	8721	83285	467	467	38	38	47.9	5.13	517030	1	1	0	783.354	3129.39	4	3129.37	0.0155	0	34.77	15	24	0.00055	K	MYQGAGADMGGAAGMDEDAPAGSGGPGPK	I	3 Oxidation (M); Deamidated (NQ)	0.10200000100000100000000000000.0
2	Pavir.Ca02597.1.p|PACid:30205664	Pavir.Ca02597.1.p|PACid:30205664	8721	83285	467	467	38	38	47.9	5.13	517032	1	1	0	1044.14	3129.39	3	3129.37	0.017	0	21.83	14	24	0.009	K	MYQGAGADMGGAAGMDEDAPAGSGGPGPK	I	3 Oxidation (M); Deamidated (NQ)	0.10200000100000100000000000000.0
2	Pavir.Ca02597.1.p|PACid:30205664	Pavir.Ca02597.1.p|PACid:30205664	8721	83285	467	467	38	38	47.9	5.13	542832	1	1	0	929.418	3713.64	4	3713.65	-0.0112	1	43.89	15	24	7.7e-05	K	MYQGAGADMGGAAGMDEDAPAGSGGPGPKIEEVD	-	3 Oxidation (M)	0.1000000010000010000000000000000000.0
2	Pavir.Ca02597.1.p|PACid:30205664	Pavir.Ca02597.1.p|PACid:30205664	8721	83285	467	467	38	38	47.9	5.13	542834	1	1	0	1238.89	3713.65	3	3713.65	-0.004	1	17.34	14	24	0.024	K	MYQGAGADMGGAAGMDEDAPAGSGGPGPKIEEVD	-	3 Oxidation (M)	0.1000000010000010000000000000000000.0			Quantitation summary for protein	126/127C	0.65	346	N/A		N/A	127n/127C	0.779	369	N/A		N/A	128c/127C	1.072	374	N/A
3	Pavir.Ca00213.1.p|PACid:30205475	Pavir.Ca00213.1.p|PACid:30205475	8007	46652	435	435	25	25	56.2	5.31	6138	1	1	0	437.271	872.527	2	872.528	-0.0016	0	33.5		31	0.029	R	LDLAGR	D
3	Pavir.Ca00213.1.p|PACid:30205475	Pavir.Ca00213.1.p|PACid:30205475	8007	46652	435	435	25	25	56.2	5.31	19975	1	1	0	498.245	994.476	2	994.478	-0.0017	0	36.11		23	0.0025	K	CDVDIR	K
3	Pavir.Ca00213.1.p|PACid:30205475	Pavir.Ca00213.1.p|PACid:30205475	8007	46652	435	435	25	25	56.2	5.31	20175	1	1	0	498.805	995.596	2	995.597	-0.001	0	32.44		22	0.0046	K	VVAPPER	K
3	Pavir.Ca00213.1.p|PACid:30205475	Pavir.Ca00213.1.p|PACid:30205475	8007	46652	435	435	25	25	56.2	5.31	20178	1	1	0	498.805	995.596	2	995.597	-0.0003	0	22.49		22	0.046	K	VVAPPER	K
3	Pavir.Ca00213.1.p|PACid:30205475	Pavir.Ca00213.1.p|PACid:30205475	8007	46652	435	435	25	25	56.2	5.31	52098	1	1	0	598.35	1194.68	2	1194.69	-0.0015	0	31.19		28	0.03	K	TSSSVEK	S
3	Pavir.Ca00213.1.p|PACid:30205475	Pavir.Ca00213.1.p|PACid:30205475	8007	46652	435	435	25	25	56.2	5.31	54539	1	1	0	603.308	1204.6	2	1204.6	-0.0031	0	51.51		25	0.00013	K	AGFAGDDAPR	A
3	Pavir.Ca00213.1.p|PACid:30205475	Pavir.Ca00213.1.p|PACid:30205475	8007	46652	435	435	25	25	56.2	5.31	54544	1	1	0	603.308	1204.6	2	1204.6	-0.0025	0	29.95		25	0.018	K	AGFAGDDAPR	A
3	Pavir.Ca00213.1.p|PACid:30205475	Pavir.Ca00213.1.p|PACid:30205475	8007	46652	435	435	25	25	56.2	5.31	54545	1	1	0	603.308	1204.6	2	1204.6	-0.0024	0	31.13		25	0.014	K	AGFAGDDAPR	A
3	Pavir.Ca00213.1.p|PACid:30205475	Pavir.Ca00213.1.p|PACid:30205475	8007	46652	435	435	25	25	56.2	5.31	54548	1	1	0	603.308	1204.6	2	1204.6	-0.0023	0	71.47		25	1.2e-06	K	AGFAGDDAPR	A
3	Pavir.Ca00213.1.p|PACid:30205475	Pavir.Ca00213.1.p|PACid:30205475	8007	46652	435	435	25	25	56.2	5.31	54549	1	1	0	603.308	1204.6	2	1204.6	-0.0023	0	33.6	16	25	0.00098	K	AGFAGDDAPR	A
3	Pavir.Ca00213.1.p|PACid:30205475	Pavir.Ca00213.1.p|PACid:30205475	8007	46652	435	435	25	25	56.2	5.31	54551	1	1	0	603.308	1204.6	2	1204.6	-0.0022	0	34.16		26	0.0078	K	AGFAGDDAPR	A
3	Pavir.Ca00213.1.p|PACid:30205475	Pavir.Ca00213.1.p|PACid:30205475	8007	46652	435	435	25	25	56.2	5.31	54552	1	1	0	603.308	1204.6	2	1204.6	-0.0022	0	43.82		26	0.00084	K	AGFAGDDAPR	A
3	Pavir.Ca00213.1.p|PACid:30205475	Pavir.Ca00213.1.p|PACid:30205475	8007	46652	435	435	25	25	56.2	5.31	54555	1	1	0	603.308	1204.6	2	1204.6	-0.002	0	35.13	25	26	0.006	K	AGFAGDDAPR	A
3	Pavir.Ca00213.1.p|PACid:30205475	Pavir.Ca00213.1.p|PACid:30205475	8007	46652	435	435	25	25	56.2	5.31	54559	1	1	0	603.308	1204.6	2	1204.6	-0.0019	0	17.57	14	26	0.025	K	AGFAGDDAPR	A
3	Pavir.Ca00213.1.p|PACid:30205475	Pavir.Ca00213.1.p|PACid:30205475	8007	46652	435	435	25	25	56.2	5.31	54560	1	1	0	603.308	1204.6	2	1204.6	-0.0019	0	56.77		26	4.3e-05	K	AGFAGDDAPR	A
3	Pavir.Ca00213.1.p|PACid:30205475	Pavir.Ca00213.1.p|PACid:30205475	8007	46652	435	435	25	25	56.2	5.31	54561	1	1	0	603.308	1204.6	2	1204.6	-0.0018	0	47.66		26	0.00035	K	AGFAGDDAPR	A
3	Pavir.Ca00213.1.p|PACid:30205475	Pavir.Ca00213.1.p|PACid:30205475	8007	46652	435	435	25	25	56.2	5.31	54565	1	1	0	603.308	1204.6	2	1204.6	-0.0016	0	59.96		26	2e-05	K	AGFAGDDAPR	A
3	Pavir.Ca00213.1.p|PACid:30205475	Pavir.Ca00213.1.p|PACid:30205475	8007	46652	435	435	25	25	56.2	5.31	54568	1	1	0	603.309	1204.6	2	1204.6	-0.0013	0	18.18	17	26	0.039	K	AGFAGDDAPR	A
3	Pavir.Ca00213.1.p|PACid:30205475	Pavir.Ca00213.1.p|PACid:30205475	8007	46652	435	435	25	25	56.2	5.31	54569	1	1	0	402.542	1204.6	3	1204.6	-0.0008	0	29.63	14	26	0.0017	K	AGFAGDDAPR	A
3	Pavir.Ca00213.1.p|PACid:30205475	Pavir.Ca00213.1.p|PACid:30205475	8007	46652	435	435	25	25	56.2	5.31	54570	1	1	0	603.309	1204.6	2	1204.6	-0.0007	0	36.56		26	0.005	K	AGFAGDDAPR	A
3	Pavir.Ca00213.1.p|PACid:30205475	Pavir.Ca00213.1.p|PACid:30205475	8007	46652	435	435	25	25	56.2	5.31	54573	1	1	0	603.309	1204.6	2	1204.6	-0.0005	0	30.06	22	26	0.0086	K	AGFAGDDAPR	A
3	Pavir.Ca00213.1.p|PACid:30205475	Pavir.Ca00213.1.p|PACid:30205475	8007	46652	435	435	25	25	56.2	5.31	97988	1	1	0	676.874	1351.73	2	1351.74	-0.0028	1	22.19	14	30	0.0093	K	CDVDIRK	D
3	Pavir.Ca00213.1.p|PACid:30205475	Pavir.Ca00213.1.p|PACid:30205475	8007	46652	435	435	25	25	56.2	5.31	97996	1	1	0	676.874	1351.73	2	1351.74	-0.0025	1	15.99	14	30	0.037	K	CDVDIRK	D
3	Pavir.Ca00213.1.p|PACid:30205475	Pavir.Ca00213.1.p|PACid:30205475	8007	46652	435	435	25	25	56.2	5.31	98004	1	1	0	451.585	1351.73	3	1351.74	-0.002	1	19.17	16	30	0.029	K	CDVDIRK	D
3	Pavir.Ca00213.1.p|PACid:30205475	Pavir.Ca00213.1.p|PACid:30205475	8007	46652	435	435	25	25	56.2	5.31	98009	1	1	0	451.585	1351.73	3	1351.74	-0.0018	1	20.93	17	30	0.022	K	CDVDIRK	D
3	Pavir.Ca00213.1.p|PACid:30205475	Pavir.Ca00213.1.p|PACid:30205475	8007	46652	435	435	25	25	56.2	5.31	98379	1	1	0	677.433	1352.85	2	1352.85	-0.0031	1	34.56	16	27	0.0008	K	VVAPPERK	Y
3	Pavir.Ca00213.1.p|PACid:30205475	Pavir.Ca00213.1.p|PACid:30205475	8007	46652	435	435	25	25	56.2	5.31	98383	1	1	0	451.958	1352.85	3	1352.85	-0.0027	1	17.45	14	27	0.023	K	VVAPPERK	Y
3	Pavir.Ca00213.1.p|PACid:30205475	Pavir.Ca00213.1.p|PACid:30205475	8007	46652	435	435	25	25	56.2	5.31	98385	1	1	0	451.958	1352.85	3	1352.85	-0.0027	1	14.83	13	27	0.041	K	VVAPPERK	Y
3	Pavir.Ca00213.1.p|PACid:30205475	Pavir.Ca00213.1.p|PACid:30205475	8007	46652	435	435	25	25	56.2	5.31	98397	1	1	0	677.433	1352.85	2	1352.85	-0.0025	1	32.66	16	27	0.0012	K	VVAPPERK	Y
3	Pavir.Ca00213.1.p|PACid:30205475	Pavir.Ca00213.1.p|PACid:30205475	8007	46652	435	435	25	25	56.2	5.31	98412	1	1	0	451.958	1352.85	3	1352.85	-0.0022	1	16.94	14	27	0.026	K	VVAPPERK	Y
3	Pavir.Ca00213.1.p|PACid:30205475	Pavir.Ca00213.1.p|PACid:30205475	8007	46652	435	435	25	25	56.2	5.31	98425	1	1	0	677.434	1352.85	2	1352.85	-0.0017	1	30.16	14	27	0.0015	K	VVAPPERK	Y
3	Pavir.Ca00213.1.p|PACid:30205475	Pavir.Ca00213.1.p|PACid:30205475	8007	46652	435	435	25	25	56.2	5.31	101139	1	1	0	681.347	1360.68	2	1360.68	-0.003	0	34.31	16	27	0.00087	R	GYSFTTTAER	E
3	Pavir.Ca00213.1.p|PACid:30205475	Pavir.Ca00213.1.p|PACid:30205475	8007	46652	435	435	25	25	56.2	5.31	101140	1	1	0	681.347	1360.68	2	1360.68	-0.0026	0	53.98	21	27	2.6e-05	R	GYSFTTTAER	E
3	Pavir.Ca00213.1.p|PACid:30205475	Pavir.Ca00213.1.p|PACid:30205475	8007	46652	435	435	25	25	56.2	5.31	107168	1	1	0	690.893	1379.77	2	1379.77	-0.0014	0	43.51	28	30	0.0015	R	DLTDSLMK	I
3	Pavir.Ca00213.1.p|PACid:30205475	Pavir.Ca00213.1.p|PACid:30205475	8007	46652	435	435	25	25	56.2	5.31	112025	1	1	0	698.89	1395.77	2	1395.77	-0.0028	0	31.22	18	29	0.003	R	DLTDSLMK	I	Oxidation (M)	0.00000010.0
3	Pavir.Ca00213.1.p|PACid:30205475	Pavir.Ca00213.1.p|PACid:30205475	8007	46652	435	435	25	25	56.2	5.31	112028	1	1	0	698.89	1395.77	2	1395.77	-0.0022	0	27.41	17	29	0.0052	R	DLTDSLMK	I	Oxidation (M)	0.00000010.0
3	Pavir.Ca00213.1.p|PACid:30205475	Pavir.Ca00213.1.p|PACid:30205475	8007	46652	435	435	25	25	56.2	5.31	112029	1	1	0	698.891	1395.77	2	1395.77	-0.0008	0	22.6	14	29	0.0076	R	DLTDSLMK	I	Oxidation (M)	0.00000010.0
3	Pavir.Ca00213.1.p|PACid:30205475	Pavir.Ca00213.1.p|PACid:30205475	8007	46652	435	435	25	25	56.2	5.31	122517	1	1	0	476.626	1426.86	3	1426.86	-0.0044	0	16.1	14	28	0.031	R	AVFPSIVGRPR	H
3	Pavir.Ca00213.1.p|PACid:30205475	Pavir.Ca00213.1.p|PACid:30205475	8007	46652	435	435	25	25	56.2	5.31	122519	1	1	0	476.627	1426.86	3	1426.86	-0.0033	0	26.3	14	28	0.0034	R	AVFPSIVGRPR	H
3	Pavir.Ca00213.1.p|PACid:30205475	Pavir.Ca00213.1.p|PACid:30205475	8007	46652	435	435	25	25	56.2	5.31	122520	1	1	0	476.627	1426.86	3	1426.86	-0.0031	0	34.83	16	28	0.00078	R	AVFPSIVGRPR	H
3	Pavir.Ca00213.1.p|PACid:30205475	Pavir.Ca00213.1.p|PACid:30205475	8007	46652	435	435	25	25	56.2	5.31	122521	1	1	0	476.627	1426.86	3	1426.86	-0.0029	0	29.18	15	28	0.0021	R	AVFPSIVGRPR	H
3	Pavir.Ca00213.1.p|PACid:30205475	Pavir.Ca00213.1.p|PACid:30205475	8007	46652	435	435	25	25	56.2	5.31	122523	1	1	0	476.627	1426.86	3	1426.86	-0.0027	0	14.69	13	28	0.042	R	AVFPSIVGRPR	H
3	Pavir.Ca00213.1.p|PACid:30205475	Pavir.Ca00213.1.p|PACid:30205475	8007	46652	435	435	25	25	56.2	5.31	122524	1	1	0	476.627	1426.86	3	1426.86	-0.0025	0	27.01	24	28	0.031	R	AVFPSIVGRPR	H
3	Pavir.Ca00213.1.p|PACid:30205475	Pavir.Ca00213.1.p|PACid:30205475	8007	46652	435	435	25	25	56.2	5.31	122525	1	1	0	476.627	1426.86	3	1426.86	-0.0025	0	42.68	25	28	0.00093	R	AVFPSIVGRPR	H
3	Pavir.Ca00213.1.p|PACid:30205475	Pavir.Ca00213.1.p|PACid:30205475	8007	46652	435	435	25	25	56.2	5.31	122526	1	1	0	476.627	1426.86	3	1426.86	-0.0024	0	35.06	25	28	0.0051	R	AVFPSIVGRPR	H
3	Pavir.Ca00213.1.p|PACid:30205475	Pavir.Ca00213.1.p|PACid:30205475	8007	46652	435	435	25	25	56.2	5.31	122528	1	1	0	476.627	1426.86	3	1426.86	-0.0022	0	31.5	18	28	0.0025	R	AVFPSIVGRPR	H
3	Pavir.Ca00213.1.p|PACid:30205475	Pavir.Ca00213.1.p|PACid:30205475	8007	46652	435	435	25	25	56.2	5.31	122529	1	1	0	476.627	1426.86	3	1426.86	-0.0021	0	28.17	25	28	0.025	R	AVFPSIVGRPR	H
3	Pavir.Ca00213.1.p|PACid:30205475	Pavir.Ca00213.1.p|PACid:30205475	8007	46652	435	435	25	25	56.2	5.31	122530	1	1	0	476.627	1426.86	3	1426.86	-0.002	0	30.2	24	28	0.013	R	AVFPSIVGRPR	H
3	Pavir.Ca00213.1.p|PACid:30205475	Pavir.Ca00213.1.p|PACid:30205475	8007	46652	435	435	25	25	56.2	5.31	122531	1	1	0	476.627	1426.86	3	1426.86	-0.002	0	34.03	26	28	0.0098	R	AVFPSIVGRPR	H
3	Pavir.Ca00213.1.p|PACid:30205475	Pavir.Ca00213.1.p|PACid:30205475	8007	46652	435	435	25	25	56.2	5.31	122532	1	1	0	476.627	1426.86	3	1426.86	-0.002	0	20.88	14	28	0.011	R	AVFPSIVGRPR	H
3	Pavir.Ca00213.1.p|PACid:30205475	Pavir.Ca00213.1.p|PACid:30205475	8007	46652	435	435	25	25	56.2	5.31	122533	1	1	0	476.627	1426.86	3	1426.86	-0.002	0	35.29	26	28	0.0069	R	AVFPSIVGRPR	H
3	Pavir.Ca00213.1.p|PACid:30205475	Pavir.Ca00213.1.p|PACid:30205475	8007	46652	435	435	25	25	56.2	5.31	122534	1	1	0	476.627	1426.86	3	1426.86	-0.0018	0	32.16	15	28	0.0011	R	AVFPSIVGRPR	H
3	Pavir.Ca00213.1.p|PACid:30205475	Pavir.Ca00213.1.p|PACid:30205475	8007	46652	435	435	25	25	56.2	5.31	122535	1	1	0	476.627	1426.86	3	1426.86	-0.0017	0	25.04	14	28	0.0045	R	AVFPSIVGRPR	H
3	Pavir.Ca00213.1.p|PACid:30205475	Pavir.Ca00213.1.p|PACid:30205475	8007	46652	435	435	25	25	56.2	5.31	122536	1	1	0	476.627	1426.86	3	1426.86	-0.0017	0	28.33	17	28	0.0046	R	AVFPSIVGRPR	H
3	Pavir.Ca00213.1.p|PACid:30205475	Pavir.Ca00213.1.p|PACid:30205475	8007	46652	435	435	25	25	56.2	5.31	122538	1	1	0	476.627	1426.86	3	1426.86	-0.0013	0	21.52	14	28	0.0096	R	AVFPSIVGRPR	H
3	Pavir.Ca00213.1.p|PACid:30205475	Pavir.Ca00213.1.p|PACid:30205475	8007	46652	435	435	25	25	56.2	5.31	122539	1	1	0	476.627	1426.86	3	1426.86	-0.0012	0	31.14	14	28	0.0012	R	AVFPSIVGRPR	H
3	Pavir.Ca00213.1.p|PACid:30205475	Pavir.Ca00213.1.p|PACid:30205475	8007	46652	435	435	25	25	56.2	5.31	122540	1	1	0	476.628	1426.86	3	1426.86	0.0002	0	31.36	18	27	0.0024	R	AVFPSIVGRPR	H
3	Pavir.Ca00213.1.p|PACid:30205475	Pavir.Ca00213.1.p|PACid:30205475	8007	46652	435	435	25	25	56.2	5.31	122541	1	1	0	476.629	1426.86	3	1426.86	0.0034	0	33.19	17	27	0.0015	R	AVFPSIVGRPR	H
3	Pavir.Ca00213.1.p|PACid:30205475	Pavir.Ca00213.1.p|PACid:30205475	8007	46652	435	435	25	25	56.2	5.31	122542	1	1	0	476.629	1426.87	3	1426.86	0.0041	0	32.38	15	27	0.00092	R	AVFPSIVGRPR	H
3	Pavir.Ca00213.1.p|PACid:30205475	Pavir.Ca00213.1.p|PACid:30205475	8007	46652	435	435	25	25	56.2	5.31	183711	1	1	0	534.966	1601.87	3	1601.88	-0.0039	0	29.18	14	30	0.0018	R	HTGVMVGMGQK	D
3	Pavir.Ca00213.1.p|PACid:30205475	Pavir.Ca00213.1.p|PACid:30205475	8007	46652	435	435	25	25	56.2	5.31	183712	1	1	0	534.966	1601.88	3	1601.88	-0.0037	0	31.03	14	30	0.0012	R	HTGVMVGMGQK	D
3	Pavir.Ca00213.1.p|PACid:30205475	Pavir.Ca00213.1.p|PACid:30205475	8007	46652	435	435	25	25	56.2	5.31	183715	1	1	0	534.966	1601.88	3	1601.88	-0.0033	0	43.61	15	30	8.1e-05	R	HTGVMVGMGQK	D
3	Pavir.Ca00213.1.p|PACid:30205475	Pavir.Ca00213.1.p|PACid:30205475	8007	46652	435	435	25	25	56.2	5.31	183720	1	1	0	534.966	1601.88	3	1601.88	-0.0024	0	43.85	16	30	8.5e-05	R	HTGVMVGMGQK	D
3	Pavir.Ca00213.1.p|PACid:30205475	Pavir.Ca00213.1.p|PACid:30205475	8007	46652	435	435	25	25	56.2	5.31	183722	1	1	0	534.966	1601.88	3	1601.88	-0.0017	0	55.54	16	30	6.7e-06	R	HTGVMVGMGQK	D
3	Pavir.Ca00213.1.p|PACid:30205475	Pavir.Ca00213.1.p|PACid:30205475	8007	46652	435	435	25	25	56.2	5.31	183723	1	1	0	401.477	1601.88	4	1601.88	-0.0014	0	21.88	15	30	0.011	R	HTGVMVGMGQK	D
3	Pavir.Ca00213.1.p|PACid:30205475	Pavir.Ca00213.1.p|PACid:30205475	8007	46652	435	435	25	25	56.2	5.31	183724	1	1	0	534.966	1601.88	3	1601.88	-0.0013	0	28.03	14	30	0.0024	R	HTGVMVGMGQK	D
3	Pavir.Ca00213.1.p|PACid:30205475	Pavir.Ca00213.1.p|PACid:30205475	8007	46652	435	435	25	25	56.2	5.31	183726	1	1	0	801.946	1601.88	2	1601.88	-0.0006	0	78.21	17	30	4.7e-08	R	HTGVMVGMGQK	D
3	Pavir.Ca00213.1.p|PACid:30205475	Pavir.Ca00213.1.p|PACid:30205475	8007	46652	435	435	25	25	56.2	5.31	185017	1	1	0	803.466	1604.92	2	1604.92	-0.0029	0	49.09		31	0.00088	K	EITALAPSSMK	I
3	Pavir.Ca00213.1.p|PACid:30205475	Pavir.Ca00213.1.p|PACid:30205475	8007	46652	435	435	25	25	56.2	5.31	185018	1	1	0	803.466	1604.92	2	1604.92	-0.0027	0	68.25		31	1.1e-05	K	EITALAPSSMK	I
3	Pavir.Ca00213.1.p|PACid:30205475	Pavir.Ca00213.1.p|PACid:30205475	8007	46652	435	435	25	25	56.2	5.31	185021	1	1	0	535.98	1604.92	3	1604.92	-0.0025	0	30.4	15	31	0.0015	K	EITALAPSSMK	I
3	Pavir.Ca00213.1.p|PACid:30205475	Pavir.Ca00213.1.p|PACid:30205475	8007	46652	435	435	25	25	56.2	5.31	185024	1	1	0	535.98	1604.92	3	1604.92	-0.0019	0	50.45	18	31	3.2e-05	K	EITALAPSSMK	I
3	Pavir.Ca00213.1.p|PACid:30205475	Pavir.Ca00213.1.p|PACid:30205475	8007	46652	435	435	25	25	56.2	5.31	185027	1	1	0	535.981	1604.92	3	1604.92	-0.0015	0	54.15	18	31	1.4e-05	K	EITALAPSSMK	I
3	Pavir.Ca00213.1.p|PACid:30205475	Pavir.Ca00213.1.p|PACid:30205475	8007	46652	435	435	25	25	56.2	5.31	185029	1	1	0	803.467	1604.92	2	1604.92	-0.0008	0	62.18		31	4.1e-05	K	EITALAPSSMK	I
3	Pavir.Ca00213.1.p|PACid:30205475	Pavir.Ca00213.1.p|PACid:30205475	8007	46652	435	435	25	25	56.2	5.31	185038	1	1	0	803.468	1604.92	2	1604.92	0.0006	0	49.32		31	0.0008	K	EITALAPSSMK	I
3	Pavir.Ca00213.1.p|PACid:30205475	Pavir.Ca00213.1.p|PACid:30205475	8007	46652	435	435	25	25	56.2	5.31	189366	1	1	0	540.297	1617.87	3	1617.87	-0.0045	0	39.43	21	30	0.00086	R	HTGVMVGMGQK	D	Oxidation (M)	0.00000001000.0
3	Pavir.Ca00213.1.p|PACid:30205475	Pavir.Ca00213.1.p|PACid:30205475	8007	46652	435	435	25	25	56.2	5.31	189368	1	1	0	540.297	1617.87	3	1617.87	-0.0045	0	36.45	15	30	0.00038	R	HTGVMVGMGQK	D	Oxidation (M)	0.00001000000.0
3	Pavir.Ca00213.1.p|PACid:30205475	Pavir.Ca00213.1.p|PACid:30205475	8007	46652	435	435	25	25	56.2	5.31	189370	1	1	0	540.297	1617.87	3	1617.87	-0.004	0	13.92	13	30	0.049	R	HTGVMVGMGQK	D	Oxidation (M)	0.00001000000.0
3	Pavir.Ca00213.1.p|PACid:30205475	Pavir.Ca00213.1.p|PACid:30205475	8007	46652	435	435	25	25	56.2	5.31	189372	1	1	0	540.297	1617.87	3	1617.87	-0.0038	0	15.34	13	30	0.036	R	HTGVMVGMGQK	D	Oxidation (M)	0.00001000000.0
3	Pavir.Ca00213.1.p|PACid:30205475	Pavir.Ca00213.1.p|PACid:30205475	8007	46652	435	435	25	25	56.2	5.31	189373	1	1	0	540.297	1617.87	3	1617.87	-0.0036	0	15.59	13	30	0.034	R	HTGVMVGMGQK	D	Oxidation (M)	0.00001000000.0
3	Pavir.Ca00213.1.p|PACid:30205475	Pavir.Ca00213.1.p|PACid:30205475	8007	46652	435	435	25	25	56.2	5.31	189374	1	1	0	540.297	1617.87	3	1617.87	-0.0036	0	18.32	14	30	0.019	R	HTGVMVGMGQK	D	Oxidation (M)	0.00001000000.0
3	Pavir.Ca00213.1.p|PACid:30205475	Pavir.Ca00213.1.p|PACid:30205475	8007	46652	435	435	25	25	56.2	5.31	189375	1	1	0	540.297	1617.87	3	1617.87	-0.0036	0	17.28	14	30	0.024	R	HTGVMVGMGQK	D	Oxidation (M)	0.00001000000.0
3	Pavir.Ca00213.1.p|PACid:30205475	Pavir.Ca00213.1.p|PACid:30205475	8007	46652	435	435	25	25	56.2	5.31	189376	1	1	0	540.297	1617.87	3	1617.87	-0.0034	0	31.48	14	30	0.0011	R	HTGVMVGMGQK	D	Oxidation (M)	0.00000001000.0
3	Pavir.Ca00213.1.p|PACid:30205475	Pavir.Ca00213.1.p|PACid:30205475	8007	46652	435	435	25	25	56.2	5.31	189377	1	1	0	540.297	1617.87	3	1617.87	-0.0033	0	23.21	21	30	0.033	R	HTGVMVGMGQK	D	Oxidation (M)	0.00001000000.0
3	Pavir.Ca00213.1.p|PACid:30205475	Pavir.Ca00213.1.p|PACid:30205475	8007	46652	435	435	25	25	56.2	5.31	189379	1	1	0	540.297	1617.87	3	1617.87	-0.0033	0	51.25	16	30	1.6e-05	R	HTGVMVGMGQK	D	Oxidation (M)	0.00000001000.0
3	Pavir.Ca00213.1.p|PACid:30205475	Pavir.Ca00213.1.p|PACid:30205475	8007	46652	435	435	25	25	56.2	5.31	189381	1	1	0	540.298	1617.87	3	1617.87	-0.0031	0	35.71	16	30	0.00054	R	HTGVMVGMGQK	D	Oxidation (M)	0.00001000000.0
3	Pavir.Ca00213.1.p|PACid:30205475	Pavir.Ca00213.1.p|PACid:30205475	8007	46652	435	435	25	25	56.2	5.31	189382	1	1	0	540.298	1617.87	3	1617.87	-0.0031	0	38.8	15	30	0.00023	R	HTGVMVGMGQK	D	Oxidation (M)	0.00000001000.0
3	Pavir.Ca00213.1.p|PACid:30205475	Pavir.Ca00213.1.p|PACid:30205475	8007	46652	435	435	25	25	56.2	5.31	189384	1	1	0	405.475	1617.87	4	1617.87	-0.0029	0	37.13	22	30	0.0018	R	HTGVMVGMGQK	D	Oxidation (M)	0.00000001000.0
3	Pavir.Ca00213.1.p|PACid:30205475	Pavir.Ca00213.1.p|PACid:30205475	8007	46652	435	435	25	25	56.2	5.31	189385	1	1	0	540.298	1617.87	3	1617.87	-0.0029	0	47.63	15	30	3.4e-05	R	HTGVMVGMGQK	D	Oxidation (M)	0.00000001000.0
3	Pavir.Ca00213.1.p|PACid:30205475	Pavir.Ca00213.1.p|PACid:30205475	8007	46652	435	435	25	25	56.2	5.31	189386	1	1	0	540.298	1617.87	3	1617.87	-0.0027	0	50.76	16	30	1.7e-05	R	HTGVMVGMGQK	D	Oxidation (M)	0.00000001000.0
3	Pavir.Ca00213.1.p|PACid:30205475	Pavir.Ca00213.1.p|PACid:30205475	8007	46652	435	435	25	25	56.2	5.31	189387	1	1	0	540.298	1617.87	3	1617.87	-0.0027	0	20.01	16	30	0.021	R	HTGVMVGMGQK	D	Oxidation (M)	0.00001000000.0
3	Pavir.Ca00213.1.p|PACid:30205475	Pavir.Ca00213.1.p|PACid:30205475	8007	46652	435	435	25	25	56.2	5.31	189390	1	1	0	809.943	1617.87	2	1617.87	-0.0026	0	40	15	30	0.00018	R	HTGVMVGMGQK	D	Oxidation (M)	0.00000001000.0
3	Pavir.Ca00213.1.p|PACid:30205475	Pavir.Ca00213.1.p|PACid:30205475	8007	46652	435	435	25	25	56.2	5.31	189392	1	1	0	809.943	1617.87	2	1617.87	-0.0024	0	16.96	14	30	0.026	R	HTGVMVGMGQK	D	Oxidation (M)	0.00000001000.0
3	Pavir.Ca00213.1.p|PACid:30205475	Pavir.Ca00213.1.p|PACid:30205475	8007	46652	435	435	25	25	56.2	5.31	189393	1	1	0	540.298	1617.87	3	1617.87	-0.0023	0	17.08	14	30	0.025	R	HTGVMVGMGQK	D	Oxidation (M)	0.00001000000.0
3	Pavir.Ca00213.1.p|PACid:30205475	Pavir.Ca00213.1.p|PACid:30205475	8007	46652	435	435	25	25	56.2	5.31	189394	1	1	0	540.298	1617.87	3	1617.87	-0.0023	0	24	14	30	0.0056	R	HTGVMVGMGQK	D	Oxidation (M)	0.00000001000.0
3	Pavir.Ca00213.1.p|PACid:30205475	Pavir.Ca00213.1.p|PACid:30205475	8007	46652	435	435	25	25	56.2	5.31	189395	1	1	0	405.475	1617.87	4	1617.87	-0.0022	0	31.48	16	30	0.0016	R	HTGVMVGMGQK	D	Oxidation (M)	0.00000001000.0
3	Pavir.Ca00213.1.p|PACid:30205475	Pavir.Ca00213.1.p|PACid:30205475	8007	46652	435	435	25	25	56.2	5.31	189396	1	1	0	540.298	1617.87	3	1617.87	-0.0021	0	24.79	14	30	0.0047	R	HTGVMVGMGQK	D	Oxidation (M)	0.00001000000.0
3	Pavir.Ca00213.1.p|PACid:30205475	Pavir.Ca00213.1.p|PACid:30205475	8007	46652	435	435	25	25	56.2	5.31	189397	1	1	0	540.298	1617.87	3	1617.87	-0.0021	0	27.34	14	30	0.0027	R	HTGVMVGMGQK	D	Oxidation (M)	0.00001000000.0
3	Pavir.Ca00213.1.p|PACid:30205475	Pavir.Ca00213.1.p|PACid:30205475	8007	46652	435	435	25	25	56.2	5.31	189398	1	1	0	540.298	1617.87	3	1617.87	-0.0021	0	29.56	14	30	0.0017	R	HTGVMVGMGQK	D	Oxidation (M)	0.00000001000.0
3	Pavir.Ca00213.1.p|PACid:30205475	Pavir.Ca00213.1.p|PACid:30205475	8007	46652	435	435	25	25	56.2	5.31	189400	1	1	0	540.298	1617.87	3	1617.87	-0.0021	0	46.04	15	30	4.8e-05	R	HTGVMVGMGQK	D	Oxidation (M)	0.00000001000.0
3	Pavir.Ca00213.1.p|PACid:30205475	Pavir.Ca00213.1.p|PACid:30205475	8007	46652	435	435	25	25	56.2	5.31	189401	1	1	0	540.298	1617.87	3	1617.87	-0.0021	0	36.05	16	30	0.00053	R	HTGVMVGMGQK	D	Oxidation (M)	0.00001000000.0
3	Pavir.Ca00213.1.p|PACid:30205475	Pavir.Ca00213.1.p|PACid:30205475	8007	46652	435	435	25	25	56.2	5.31	189402	1	1	0	540.298	1617.87	3	1617.87	-0.0021	0	37.78	15	30	0.00033	R	HTGVMVGMGQK	D	Oxidation (M)	0.00001000000.0
3	Pavir.Ca00213.1.p|PACid:30205475	Pavir.Ca00213.1.p|PACid:30205475	8007	46652	435	435	25	25	56.2	5.31	189403	1	1	0	540.298	1617.87	3	1617.87	-0.002	0	33.7	15	30	0.00069	R	HTGVMVGMGQK	D	Oxidation (M)	0.00001000000.0
3	Pavir.Ca00213.1.p|PACid:30205475	Pavir.Ca00213.1.p|PACid:30205475	8007	46652	435	435	25	25	56.2	5.31	189404	1	1	0	540.298	1617.87	3	1617.87	-0.002	0	33.45	15	30	0.00073	R	HTGVMVGMGQK	D	Oxidation (M)	0.00001000000.0
3	Pavir.Ca00213.1.p|PACid:30205475	Pavir.Ca00213.1.p|PACid:30205475	8007	46652	435	435	25	25	56.2	5.31	189405	1	1	0	540.298	1617.87	3	1617.87	-0.002	0	34.36	15	30	0.0006	R	HTGVMVGMGQK	D	Oxidation (M)	0.00000001000.0
3	Pavir.Ca00213.1.p|PACid:30205475	Pavir.Ca00213.1.p|PACid:30205475	8007	46652	435	435	25	25	56.2	5.31	189406	1	1	0	540.298	1617.87	3	1617.87	-0.002	0	39.74	15	30	0.00019	R	HTGVMVGMGQK	D	Oxidation (M)	0.00001000000.0
3	Pavir.Ca00213.1.p|PACid:30205475	Pavir.Ca00213.1.p|PACid:30205475	8007	46652	435	435	25	25	56.2	5.31	189407	1	1	0	540.298	1617.87	3	1617.87	-0.0018	0	35.96	15	30	0.00043	R	HTGVMVGMGQK	D	Oxidation (M)	0.00001000000.0
3	Pavir.Ca00213.1.p|PACid:30205475	Pavir.Ca00213.1.p|PACid:30205475	8007	46652	435	435	25	25	56.2	5.31	189408	1	1	0	540.298	1617.87	3	1617.87	-0.0018	0	43.87	17	30	0.00011	R	HTGVMVGMGQK	D	Oxidation (M)	0.00001000000.0
3	Pavir.Ca00213.1.p|PACid:30205475	Pavir.Ca00213.1.p|PACid:30205475	8007	46652	435	435	25	25	56.2	5.31	189410	1	1	0	540.298	1617.87	3	1617.87	-0.0016	0	28.35	14	30	0.0022	R	HTGVMVGMGQK	D	Oxidation (M)	0.00001000000.0
3	Pavir.Ca00213.1.p|PACid:30205475	Pavir.Ca00213.1.p|PACid:30205475	8007	46652	435	435	25	25	56.2	5.31	189411	1	1	0	540.298	1617.87	3	1617.87	-0.0016	0	31.56	14	30	0.0011	R	HTGVMVGMGQK	D	Oxidation (M)	0.00000001000.0
3	Pavir.Ca00213.1.p|PACid:30205475	Pavir.Ca00213.1.p|PACid:30205475	8007	46652	435	435	25	25	56.2	5.31	189412	1	1	0	809.943	1617.87	2	1617.87	-0.0015	0	51.67	16	30	1.4e-05	R	HTGVMVGMGQK	D	Oxidation (M)	0.00001000000.0
3	Pavir.Ca00213.1.p|PACid:30205475	Pavir.Ca00213.1.p|PACid:30205475	8007	46652	435	435	25	25	56.2	5.31	189413	1	1	0	540.298	1617.87	3	1617.87	-0.0014	0	26.83	14	30	0.003	R	HTGVMVGMGQK	D	Oxidation (M)	0.00001000000.0
3	Pavir.Ca00213.1.p|PACid:30205475	Pavir.Ca00213.1.p|PACid:30205475	8007	46652	435	435	25	25	56.2	5.31	189414	1	1	0	540.298	1617.87	3	1617.87	-0.0014	0	51.27	16	30	1.6e-05	R	HTGVMVGMGQK	D	Oxidation (M)	0.00000001000.0
3	Pavir.Ca00213.1.p|PACid:30205475	Pavir.Ca00213.1.p|PACid:30205475	8007	46652	435	435	25	25	56.2	5.31	189415	1	1	0	540.298	1617.87	3	1617.87	-0.0014	0	35.59	16	30	0.00057	R	HTGVMVGMGQK	D	Oxidation (M)	0.00001000000.0
3	Pavir.Ca00213.1.p|PACid:30205475	Pavir.Ca00213.1.p|PACid:30205475	8007	46652	435	435	25	25	56.2	5.31	189416	1	1	0	809.943	1617.87	2	1617.87	-0.0012	0	37.99	15	30	0.00027	R	HTGVMVGMGQK	D	Oxidation (M)	0.00001000000.0
3	Pavir.Ca00213.1.p|PACid:30205475	Pavir.Ca00213.1.p|PACid:30205475	8007	46652	435	435	25	25	56.2	5.31	189417	1	1	0	540.298	1617.87	3	1617.87	-0.001	0	18.88	14	30	0.017	R	HTGVMVGMGQK	D	Oxidation (M)	0.00000001000.0
3	Pavir.Ca00213.1.p|PACid:30205475	Pavir.Ca00213.1.p|PACid:30205475	8007	46652	435	435	25	25	56.2	5.31	189418	1	1	0	540.298	1617.87	3	1617.87	-0.0009	0	25.14	14	30	0.0044	R	HTGVMVGMGQK	D	Oxidation (M)	0.00001000000.0
3	Pavir.Ca00213.1.p|PACid:30205475	Pavir.Ca00213.1.p|PACid:30205475	8007	46652	435	435	25	25	56.2	5.31	189419	1	1	0	540.298	1617.87	3	1617.87	-0.0009	0	23.94	14	30	0.0057	R	HTGVMVGMGQK	D	Oxidation (M)	0.00001000000.0
3	Pavir.Ca00213.1.p|PACid:30205475	Pavir.Ca00213.1.p|PACid:30205475	8007	46652	435	435	25	25	56.2	5.31	189420	1	1	0	540.298	1617.87	3	1617.87	-0.0007	0	17.43	14	30	0.023	R	HTGVMVGMGQK	D	Oxidation (M)	0.00001000000.0
3	Pavir.Ca00213.1.p|PACid:30205475	Pavir.Ca00213.1.p|PACid:30205475	8007	46652	435	435	25	25	56.2	5.31	189421	1	1	0	809.944	1617.87	2	1617.87	-0.0007	0	29.55	14	30	0.0017	R	HTGVMVGMGQK	D	Oxidation (M)	0.00000001000.0
3	Pavir.Ca00213.1.p|PACid:30205475	Pavir.Ca00213.1.p|PACid:30205475	8007	46652	435	435	25	25	56.2	5.31	189422	1	1	0	540.299	1617.87	3	1617.87	0.0004	0	15.31	13	30	0.037	R	HTGVMVGMGQK	D	Oxidation (M)	0.00001000000.0
3	Pavir.Ca00213.1.p|PACid:30205475	Pavir.Ca00213.1.p|PACid:30205475	8007	46652	435	435	25	25	56.2	5.31	189423	1	1	0	405.476	1617.87	4	1617.87	0.0006	0	14.97	14	30	0.041	R	HTGVMVGMGQK	D	Oxidation (M)	0.00001000000.0
3	Pavir.Ca00213.1.p|PACid:30205475	Pavir.Ca00213.1.p|PACid:30205475	8007	46652	435	435	25	25	56.2	5.31	189428	1	1	0	540.299	1617.88	3	1617.87	0.0024	0	36.28	16	30	0.00049	R	HTGVMVGMGQK	D	Oxidation (M)	0.00001000000.0
3	Pavir.Ca00213.1.p|PACid:30205475	Pavir.Ca00213.1.p|PACid:30205475	8007	46652	435	435	25	25	56.2	5.31	190980	1	1	0	811.463	1620.91	2	1620.92	-0.0042	0	22.18	21	31	0.044	K	EITALAPSSMK	I	Oxidation (M)	0.00000000010.0
3	Pavir.Ca00213.1.p|PACid:30205475	Pavir.Ca00213.1.p|PACid:30205475	8007	46652	435	435	25	25	56.2	5.31	190984	1	1	0	541.311	1620.91	3	1620.92	-0.0038	0	37.8	16	31	0.00038	K	EITALAPSSMK	I	Oxidation (M)	0.00000000010.0
3	Pavir.Ca00213.1.p|PACid:30205475	Pavir.Ca00213.1.p|PACid:30205475	8007	46652	435	435	25	25	56.2	5.31	190987	1	1	0	541.312	1620.91	3	1620.92	-0.0029	0	23	14	31	0.0075	K	EITALAPSSMK	I	Oxidation (M)	0.00000000010.0
3	Pavir.Ca00213.1.p|PACid:30205475	Pavir.Ca00213.1.p|PACid:30205475	8007	46652	435	435	25	25	56.2	5.31	190988	1	1	0	811.464	1620.91	2	1620.92	-0.0029	0	47.29		31	0.0013	K	EITALAPSSMK	I	Oxidation (M)	0.00000000010.0
3	Pavir.Ca00213.1.p|PACid:30205475	Pavir.Ca00213.1.p|PACid:30205475	8007	46652	435	435	25	25	56.2	5.31	190990	1	1	0	541.312	1620.91	3	1620.92	-0.0026	0	17.99	14	31	0.025	K	EITALAPSSMK	I	Oxidation (M)	0.00000000010.0
3	Pavir.Ca00213.1.p|PACid:30205475	Pavir.Ca00213.1.p|PACid:30205475	8007	46652	435	435	25	25	56.2	5.31	190993	1	1	0	811.464	1620.91	2	1620.92	-0.0025	0	49.67		31	0.00073	K	EITALAPSSMK	I	Oxidation (M)	0.00000000010.0
3	Pavir.Ca00213.1.p|PACid:30205475	Pavir.Ca00213.1.p|PACid:30205475	8007	46652	435	435	25	25	56.2	5.31	190995	1	1	0	811.464	1620.91	2	1620.92	-0.0024	0	23.82	20	31	0.023	K	EITALAPSSMK	I	Oxidation (M)	0.00000000010.0
3	Pavir.Ca00213.1.p|PACid:30205475	Pavir.Ca00213.1.p|PACid:30205475	8007	46652	435	435	25	25	56.2	5.31	191002	1	1	0	541.312	1620.91	3	1620.92	-0.0018	0	24.55	14	31	0.005	K	EITALAPSSMK	I	Oxidation (M)	0.00000000010.0
3	Pavir.Ca00213.1.p|PACid:30205475	Pavir.Ca00213.1.p|PACid:30205475	8007	46652	435	435	25	25	56.2	5.31	191005	1	1	0	811.465	1620.91	2	1620.92	-0.0017	0	18.33	14	31	0.022	K	EITALAPSSMK	I	Oxidation (M)	0.00000000010.0
3	Pavir.Ca00213.1.p|PACid:30205475	Pavir.Ca00213.1.p|PACid:30205475	8007	46652	435	435	25	25	56.2	5.31	191007	1	1	0	541.312	1620.91	3	1620.92	-0.0017	0	47.77	19	31	8e-05	K	EITALAPSSMK	I	Oxidation (M)	0.00000000010.0
3	Pavir.Ca00213.1.p|PACid:30205475	Pavir.Ca00213.1.p|PACid:30205475	8007	46652	435	435	25	25	56.2	5.31	191009	1	1	0	541.312	1620.91	3	1620.92	-0.0015	0	36.7	16	31	0.00045	K	EITALAPSSMK	I	Oxidation (M)	0.00000000010.0
3	Pavir.Ca00213.1.p|PACid:30205475	Pavir.Ca00213.1.p|PACid:30205475	8007	46652	435	435	25	25	56.2	5.31	191013	1	1	0	541.312	1620.91	3	1620.92	-0.0013	0	29.29	16	31	0.0024	K	EITALAPSSMK	I	Oxidation (M)	0.00000000010.0
3	Pavir.Ca00213.1.p|PACid:30205475	Pavir.Ca00213.1.p|PACid:30205475	8007	46652	435	435	25	25	56.2	5.31	191014	1	1	0	541.312	1620.91	3	1620.92	-0.0013	0	41.75	20	31	0.00042	K	EITALAPSSMK	I	Oxidation (M)	0.00000000010.0
3	Pavir.Ca00213.1.p|PACid:30205475	Pavir.Ca00213.1.p|PACid:30205475	8007	46652	435	435	25	25	56.2	5.31	191015	1	1	0	541.312	1620.91	3	1620.92	-0.0013	0	42.51	16	31	0.00014	K	EITALAPSSMK	I	Oxidation (M)	0.00000000010.0
3	Pavir.Ca00213.1.p|PACid:30205475	Pavir.Ca00213.1.p|PACid:30205475	8007	46652	435	435	25	25	56.2	5.31	191016	1	1	0	811.465	1620.92	2	1620.92	-0.0011	0	38.07		31	0.01	K	EITALAPSSMK	I	Oxidation (M)	0.00000000010.0
3	Pavir.Ca00213.1.p|PACid:30205475	Pavir.Ca00213.1.p|PACid:30205475	8007	46652	435	435	25	25	56.2	5.31	195908	1	1	0	817.938	1633.86	2	1633.87	-0.0062	0	22.57	14	30	0.0076	R	HTGVMVGMGQK	D	2 Oxidation (M)	0.00001001000.0
3	Pavir.Ca00213.1.p|PACid:30205475	Pavir.Ca00213.1.p|PACid:30205475	8007	46652	435	435	25	25	56.2	5.31	195909	1	1	0	545.628	1633.86	3	1633.87	-0.0055	0	19.16	17	30	0.036	R	HTGVMVGMGQK	D	2 Oxidation (M)	0.00001001000.0
3	Pavir.Ca00213.1.p|PACid:30205475	Pavir.Ca00213.1.p|PACid:30205475	8007	46652	435	435	25	25	56.2	5.31	195912	1	1	0	545.629	1633.86	3	1633.87	-0.0048	0	15.21	13	30	0.037	R	HTGVMVGMGQK	D	2 Oxidation (M)	0.00001001000.0
3	Pavir.Ca00213.1.p|PACid:30205475	Pavir.Ca00213.1.p|PACid:30205475	8007	46652	435	435	25	25	56.2	5.31	195913	1	1	0	817.939	1633.86	2	1633.87	-0.0046	0	18.76	14	30	0.017	R	HTGVMVGMGQK	D	2 Oxidation (M)	0.00001001000.0
3	Pavir.Ca00213.1.p|PACid:30205475	Pavir.Ca00213.1.p|PACid:30205475	8007	46652	435	435	25	25	56.2	5.31	195914	1	1	0	545.629	1633.86	3	1633.87	-0.0045	0	22.32	14	30	0.0083	R	HTGVMVGMGQK	D	2 Oxidation (M)	0.00001001000.0
3	Pavir.Ca00213.1.p|PACid:30205475	Pavir.Ca00213.1.p|PACid:30205475	8007	46652	435	435	25	25	56.2	5.31	195917	1	1	0	545.629	1633.86	3	1633.87	-0.0043	0	21.16	16	30	0.018	R	HTGVMVGMGQK	D	2 Oxidation (M)	0.00001001000.0
3	Pavir.Ca00213.1.p|PACid:30205475	Pavir.Ca00213.1.p|PACid:30205475	8007	46652	435	435	25	25	56.2	5.31	195919	1	1	0	545.629	1633.86	3	1633.87	-0.0041	0	24.02	19	30	0.016	R	HTGVMVGMGQK	D	2 Oxidation (M)	0.00001001000.0
3	Pavir.Ca00213.1.p|PACid:30205475	Pavir.Ca00213.1.p|PACid:30205475	8007	46652	435	435	25	25	56.2	5.31	195922	1	1	0	545.629	1633.86	3	1633.87	-0.0039	0	14.72	14	30	0.045	R	HTGVMVGMGQK	D	2 Oxidation (M)	0.00001001000.0
3	Pavir.Ca00213.1.p|PACid:30205475	Pavir.Ca00213.1.p|PACid:30205475	8007	46652	435	435	25	25	56.2	5.31	195924	1	1	0	545.629	1633.86	3	1633.87	-0.0039	0	14.42	13	30	0.044	R	HTGVMVGMGQK	D	2 Oxidation (M)	0.00001001000.0
3	Pavir.Ca00213.1.p|PACid:30205475	Pavir.Ca00213.1.p|PACid:30205475	8007	46652	435	435	25	25	56.2	5.31	195925	1	1	0	545.629	1633.86	3	1633.87	-0.0039	0	34.06	20	30	0.0024	R	HTGVMVGMGQK	D	2 Oxidation (M)	0.00001001000.0
3	Pavir.Ca00213.1.p|PACid:30205475	Pavir.Ca00213.1.p|PACid:30205475	8007	46652	435	435	25	25	56.2	5.31	195926	1	1	0	545.629	1633.86	3	1633.87	-0.0039	0	26.24	18	30	0.0085	R	HTGVMVGMGQK	D	2 Oxidation (M)	0.00001001000.0
3	Pavir.Ca00213.1.p|PACid:30205475	Pavir.Ca00213.1.p|PACid:30205475	8007	46652	435	435	25	25	56.2	5.31	195927	1	1	0	545.629	1633.86	3	1633.87	-0.0039	0	26.74	14	30	0.0031	R	HTGVMVGMGQK	D	2 Oxidation (M)	0.00001001000.0
3	Pavir.Ca00213.1.p|PACid:30205475	Pavir.Ca00213.1.p|PACid:30205475	8007	46652	435	435	25	25	56.2	5.31	195928	1	1	0	545.629	1633.86	3	1633.87	-0.0039	0	23.91	14	30	0.0057	R	HTGVMVGMGQK	D	2 Oxidation (M)	0.00001001000.0
3	Pavir.Ca00213.1.p|PACid:30205475	Pavir.Ca00213.1.p|PACid:30205475	8007	46652	435	435	25	25	56.2	5.31	195931	1	1	0	545.629	1633.86	3	1633.87	-0.0037	0	30.35	21	30	0.0065	R	HTGVMVGMGQK	D	2 Oxidation (M)	0.00001001000.0
3	Pavir.Ca00213.1.p|PACid:30205475	Pavir.Ca00213.1.p|PACid:30205475	8007	46652	435	435	25	25	56.2	5.31	195932	1	1	0	545.629	1633.87	3	1633.87	-0.0035	0	25.77	16	30	0.006	R	HTGVMVGMGQK	D	2 Oxidation (M)	0.00001001000.0
3	Pavir.Ca00213.1.p|PACid:30205475	Pavir.Ca00213.1.p|PACid:30205475	8007	46652	435	435	25	25	56.2	5.31	195933	1	1	0	545.629	1633.87	3	1633.87	-0.0035	0	28.77	20	30	0.0071	R	HTGVMVGMGQK	D	2 Oxidation (M)	0.00001001000.0
3	Pavir.Ca00213.1.p|PACid:30205475	Pavir.Ca00213.1.p|PACid:30205475	8007	46652	435	435	25	25	56.2	5.31	195935	1	1	0	545.629	1633.87	3	1633.87	-0.0035	0	24.92	14	30	0.0046	R	HTGVMVGMGQK	D	2 Oxidation (M)	0.00001001000.0
3	Pavir.Ca00213.1.p|PACid:30205475	Pavir.Ca00213.1.p|PACid:30205475	8007	46652	435	435	25	25	56.2	5.31	195941	1	1	0	545.629	1633.87	3	1633.87	-0.0033	0	17.72	16	30	0.039	R	HTGVMVGMGQK	D	2 Oxidation (M)	0.00001001000.0
3	Pavir.Ca00213.1.p|PACid:30205475	Pavir.Ca00213.1.p|PACid:30205475	8007	46652	435	435	25	25	56.2	5.31	195943	1	1	0	545.629	1633.87	3	1633.87	-0.0033	0	27.72	19	30	0.007	R	HTGVMVGMGQK	D	2 Oxidation (M)	0.00001001000.0
3	Pavir.Ca00213.1.p|PACid:30205475	Pavir.Ca00213.1.p|PACid:30205475	8007	46652	435	435	25	25	56.2	5.31	195944	1	1	0	545.629	1633.87	3	1633.87	-0.0033	0	34.78	20	30	0.002	R	HTGVMVGMGQK	D	2 Oxidation (M)	0.00001001000.0
3	Pavir.Ca00213.1.p|PACid:30205475	Pavir.Ca00213.1.p|PACid:30205475	8007	46652	435	435	25	25	56.2	5.31	195945	1	1	0	545.629	1633.87	3	1633.87	-0.0033	0	31.16	15	30	0.0015	R	HTGVMVGMGQK	D	2 Oxidation (M)	0.00001001000.0
3	Pavir.Ca00213.1.p|PACid:30205475	Pavir.Ca00213.1.p|PACid:30205475	8007	46652	435	435	25	25	56.2	5.31	195946	1	1	0	545.629	1633.87	3	1633.87	-0.0033	0	41.05	17	30	0.00024	R	HTGVMVGMGQK	D	2 Oxidation (M)	0.00001001000.0
3	Pavir.Ca00213.1.p|PACid:30205475	Pavir.Ca00213.1.p|PACid:30205475	8007	46652	435	435	25	25	56.2	5.31	195948	1	1	0	545.629	1633.87	3	1633.87	-0.0032	0	14.27	13	30	0.046	R	HTGVMVGMGQK	D	2 Oxidation (M)	0.00001001000.0
3	Pavir.Ca00213.1.p|PACid:30205475	Pavir.Ca00213.1.p|PACid:30205475	8007	46652	435	435	25	25	56.2	5.31	195951	1	1	0	545.629	1633.87	3	1633.87	-0.0032	0	37.57	25	30	0.0028	R	HTGVMVGMGQK	D	2 Oxidation (M)	0.00001001000.0
3	Pavir.Ca00213.1.p|PACid:30205475	Pavir.Ca00213.1.p|PACid:30205475	8007	46652	435	435	25	25	56.2	5.31	195952	1	1	0	545.629	1633.87	3	1633.87	-0.0032	0	31.78	20	30	0.0034	R	HTGVMVGMGQK	D	2 Oxidation (M)	0.00001001000.0
3	Pavir.Ca00213.1.p|PACid:30205475	Pavir.Ca00213.1.p|PACid:30205475	8007	46652	435	435	25	25	56.2	5.31	195953	1	1	0	545.629	1633.87	3	1633.87	-0.0032	0	41.44	22	30	0.00069	R	HTGVMVGMGQK	D	2 Oxidation (M)	0.00001001000.0
3	Pavir.Ca00213.1.p|PACid:30205475	Pavir.Ca00213.1.p|PACid:30205475	8007	46652	435	435	25	25	56.2	5.31	195955	1	1	0	545.629	1633.87	3	1633.87	-0.003	0	16.49	14	30	0.028	R	HTGVMVGMGQK	D	2 Oxidation (M)	0.00001001000.0
3	Pavir.Ca00213.1.p|PACid:30205475	Pavir.Ca00213.1.p|PACid:30205475	8007	46652	435	435	25	25	56.2	5.31	195957	1	1	0	545.629	1633.87	3	1633.87	-0.003	0	16.92	14	30	0.026	R	HTGVMVGMGQK	D	2 Oxidation (M)	0.00001001000.0
3	Pavir.Ca00213.1.p|PACid:30205475	Pavir.Ca00213.1.p|PACid:30205475	8007	46652	435	435	25	25	56.2	5.31	195958	1	1	0	545.629	1633.87	3	1633.87	-0.003	0	28.61	24	30	0.019	R	HTGVMVGMGQK	D	2 Oxidation (M)	0.00001001000.0
3	Pavir.Ca00213.1.p|PACid:30205475	Pavir.Ca00213.1.p|PACid:30205475	8007	46652	435	435	25	25	56.2	5.31	195960	1	1	0	545.629	1633.87	3	1633.87	-0.003	0	30.58	21	30	0.0066	R	HTGVMVGMGQK	D	2 Oxidation (M)	0.00001001000.0
3	Pavir.Ca00213.1.p|PACid:30205475	Pavir.Ca00213.1.p|PACid:30205475	8007	46652	435	435	25	25	56.2	5.31	195961	1	1	0	545.629	1633.87	3	1633.87	-0.003	0	31.9	14	30	0.001	R	HTGVMVGMGQK	D	2 Oxidation (M)	0.00001001000.0
3	Pavir.Ca00213.1.p|PACid:30205475	Pavir.Ca00213.1.p|PACid:30205475	8007	46652	435	435	25	25	56.2	5.31	195962	1	1	0	545.629	1633.87	3	1633.87	-0.003	0	33.79	15	30	0.00068	R	HTGVMVGMGQK	D	2 Oxidation (M)	0.00001001000.0
3	Pavir.Ca00213.1.p|PACid:30205475	Pavir.Ca00213.1.p|PACid:30205475	8007	46652	435	435	25	25	56.2	5.31	195963	1	1	0	409.474	1633.87	4	1633.87	-0.0028	0	14.29	13	30	0.046	R	HTGVMVGMGQK	D	2 Oxidation (M)	0.00001001000.0
3	Pavir.Ca00213.1.p|PACid:30205475	Pavir.Ca00213.1.p|PACid:30205475	8007	46652	435	435	25	25	56.2	5.31	195964	1	1	0	545.629	1633.87	3	1633.87	-0.0028	0	19.26	15	30	0.02	R	HTGVMVGMGQK	D	2 Oxidation (M)	0.00001001000.0
3	Pavir.Ca00213.1.p|PACid:30205475	Pavir.Ca00213.1.p|PACid:30205475	8007	46652	435	435	25	25	56.2	5.31	195968	1	1	0	545.629	1633.87	3	1633.87	-0.0028	0	29.28	23	30	0.013	R	HTGVMVGMGQK	D	2 Oxidation (M)	0.00001001000.0
3	Pavir.Ca00213.1.p|PACid:30205475	Pavir.Ca00213.1.p|PACid:30205475	8007	46652	435	435	25	25	56.2	5.31	195969	1	1	0	545.629	1633.87	3	1633.87	-0.0028	0	27.77	20	30	0.0091	R	HTGVMVGMGQK	D	2 Oxidation (M)	0.00001001000.0
3	Pavir.Ca00213.1.p|PACid:30205475	Pavir.Ca00213.1.p|PACid:30205475	8007	46652	435	435	25	25	56.2	5.31	195970	1	1	0	545.629	1633.87	3	1633.87	-0.0028	0	22.74	14	30	0.0079	R	HTGVMVGMGQK	D	2 Oxidation (M)	0.00001001000.0
3	Pavir.Ca00213.1.p|PACid:30205475	Pavir.Ca00213.1.p|PACid:30205475	8007	46652	435	435	25	25	56.2	5.31	195971	1	1	0	545.629	1633.87	3	1633.87	-0.0028	0	41.48	24	30	0.00092	R	HTGVMVGMGQK	D	2 Oxidation (M)	0.00001001000.0
3	Pavir.Ca00213.1.p|PACid:30205475	Pavir.Ca00213.1.p|PACid:30205475	8007	46652	435	435	25	25	56.2	5.31	195972	1	1	0	545.629	1633.87	3	1633.87	-0.0028	0	36.08	21	30	0.0019	R	HTGVMVGMGQK	D	2 Oxidation (M)	0.00001001000.0
3	Pavir.Ca00213.1.p|PACid:30205475	Pavir.Ca00213.1.p|PACid:30205475	8007	46652	435	435	25	25	56.2	5.31	195973	1	1	0	545.629	1633.87	3	1633.87	-0.0028	0	38.96	17	30	0.00037	R	HTGVMVGMGQK	D	2 Oxidation (M)	0.00001001000.0
3	Pavir.Ca00213.1.p|PACid:30205475	Pavir.Ca00213.1.p|PACid:30205475	8007	46652	435	435	25	25	56.2	5.31	195974	1	1	0	545.629	1633.87	3	1633.87	-0.0028	0	40.77	23	30	0.00087	R	HTGVMVGMGQK	D	2 Oxidation (M)	0.00001001000.0
3	Pavir.Ca00213.1.p|PACid:30205475	Pavir.Ca00213.1.p|PACid:30205475	8007	46652	435	435	25	25	56.2	5.31	195976	1	1	0	545.629	1633.87	3	1633.87	-0.0026	0	34.99	22	30	0.0028	R	HTGVMVGMGQK	D	2 Oxidation (M)	0.00001001000.0
3	Pavir.Ca00213.1.p|PACid:30205475	Pavir.Ca00213.1.p|PACid:30205475	8007	46652	435	435	25	25	56.2	5.31	195977	1	1	0	545.629	1633.87	3	1633.87	-0.0026	0	36.62	22	30	0.0021	R	HTGVMVGMGQK	D	2 Oxidation (M)	0.00001001000.0
3	Pavir.Ca00213.1.p|PACid:30205475	Pavir.Ca00213.1.p|PACid:30205475	8007	46652	435	435	25	25	56.2	5.31	195978	1	1	0	545.629	1633.87	3	1633.87	-0.0026	0	37.97	23	30	0.002	R	HTGVMVGMGQK	D	2 Oxidation (M)	0.00001001000.0
3	Pavir.Ca00213.1.p|PACid:30205475	Pavir.Ca00213.1.p|PACid:30205475	8007	46652	435	435	25	25	56.2	5.31	195979	1	1	0	545.629	1633.87	3	1633.87	-0.0026	0	33.55	20	30	0.0027	R	HTGVMVGMGQK	D	2 Oxidation (M)	0.00001001000.0
3	Pavir.Ca00213.1.p|PACid:30205475	Pavir.Ca00213.1.p|PACid:30205475	8007	46652	435	435	25	25	56.2	5.31	195980	1	1	0	545.629	1633.87	3	1633.87	-0.0026	0	33.4	15	30	0.00074	R	HTGVMVGMGQK	D	2 Oxidation (M)	0.00001001000.0
3	Pavir.Ca00213.1.p|PACid:30205475	Pavir.Ca00213.1.p|PACid:30205475	8007	46652	435	435	25	25	56.2	5.31	195982	1	1	0	545.629	1633.87	3	1633.87	-0.0024	0	23.24	21	30	0.03	R	HTGVMVGMGQK	D	2 Oxidation (M)	0.00001001000.0
3	Pavir.Ca00213.1.p|PACid:30205475	Pavir.Ca00213.1.p|PACid:30205475	8007	46652	435	435	25	25	56.2	5.31	195984	1	1	0	545.629	1633.87	3	1633.87	-0.0024	0	13.95	13	30	0.049	R	HTGVMVGMGQK	D	2 Oxidation (M)	0.00001001000.0
3	Pavir.Ca00213.1.p|PACid:30205475	Pavir.Ca00213.1.p|PACid:30205475	8007	46652	435	435	25	25	56.2	5.31	195985	1	1	0	545.629	1633.87	3	1633.87	-0.0024	0	24.23	14	30	0.0053	R	HTGVMVGMGQK	D	2 Oxidation (M)	0.00001001000.0
3	Pavir.Ca00213.1.p|PACid:30205475	Pavir.Ca00213.1.p|PACid:30205475	8007	46652	435	435	25	25	56.2	5.31	195987	1	1	0	545.629	1633.87	3	1633.87	-0.0024	0	36.34	22	30	0.002	R	HTGVMVGMGQK	D	2 Oxidation (M)	0.00001001000.0
3	Pavir.Ca00213.1.p|PACid:30205475	Pavir.Ca00213.1.p|PACid:30205475	8007	46652	435	435	25	25	56.2	5.31	195989	1	1	0	545.629	1633.87	3	1633.87	-0.0024	0	40.52	21	30	0.0007	R	HTGVMVGMGQK	D	2 Oxidation (M)	0.00001001000.0
3	Pavir.Ca00213.1.p|PACid:30205475	Pavir.Ca00213.1.p|PACid:30205475	8007	46652	435	435	25	25	56.2	5.31	195990	1	1	0	409.474	1633.87	4	1633.87	-0.0023	0	23.8	15	30	0.0077	R	HTGVMVGMGQK	D	2 Oxidation (M)	0.00001001000.0
3	Pavir.Ca00213.1.p|PACid:30205475	Pavir.Ca00213.1.p|PACid:30205475	8007	46652	435	435	25	25	56.2	5.31	195995	1	1	0	545.629	1633.87	3	1633.87	-0.0023	0	27.56	17	30	0.0051	R	HTGVMVGMGQK	D	2 Oxidation (M)	0.00001001000.0
3	Pavir.Ca00213.1.p|PACid:30205475	Pavir.Ca00213.1.p|PACid:30205475	8007	46652	435	435	25	25	56.2	5.31	195996	1	1	0	545.629	1633.87	3	1633.87	-0.0023	0	15.28	13	30	0.037	R	HTGVMVGMGQK	D	2 Oxidation (M)	0.00001001000.0
3	Pavir.Ca00213.1.p|PACid:30205475	Pavir.Ca00213.1.p|PACid:30205475	8007	46652	435	435	25	25	56.2	5.31	195998	1	1	0	545.629	1633.87	3	1633.87	-0.0023	0	32.81	15	30	0.00084	R	HTGVMVGMGQK	D	2 Oxidation (M)	0.00001001000.0
3	Pavir.Ca00213.1.p|PACid:30205475	Pavir.Ca00213.1.p|PACid:30205475	8007	46652	435	435	25	25	56.2	5.31	196004	1	1	0	817.941	1633.87	2	1633.87	-0.0021	0	23.58	14	30	0.0061	R	HTGVMVGMGQK	D	2 Oxidation (M)	0.00001001000.0
3	Pavir.Ca00213.1.p|PACid:30205475	Pavir.Ca00213.1.p|PACid:30205475	8007	46652	435	435	25	25	56.2	5.31	196009	1	1	0	545.63	1633.87	3	1633.87	-0.0021	0	34.9	24	30	0.0048	R	HTGVMVGMGQK	D	2 Oxidation (M)	0.00001001000.0
3	Pavir.Ca00213.1.p|PACid:30205475	Pavir.Ca00213.1.p|PACid:30205475	8007	46652	435	435	25	25	56.2	5.31	196010	1	1	0	545.63	1633.87	3	1633.87	-0.0021	0	33.54	19	30	0.0022	R	HTGVMVGMGQK	D	2 Oxidation (M)	0.00001001000.0
3	Pavir.Ca00213.1.p|PACid:30205475	Pavir.Ca00213.1.p|PACid:30205475	8007	46652	435	435	25	25	56.2	5.31	196011	1	1	0	545.63	1633.87	3	1633.87	-0.0021	0	31.44	24	30	0.01	R	HTGVMVGMGQK	D	2 Oxidation (M)	0.00001001000.0
3	Pavir.Ca00213.1.p|PACid:30205475	Pavir.Ca00213.1.p|PACid:30205475	8007	46652	435	435	25	25	56.2	5.31	196013	1	1	0	545.63	1633.87	3	1633.87	-0.0021	0	22.18	14	30	0.0083	R	HTGVMVGMGQK	D	2 Oxidation (M)	0.00001001000.0
3	Pavir.Ca00213.1.p|PACid:30205475	Pavir.Ca00213.1.p|PACid:30205475	8007	46652	435	435	25	25	56.2	5.31	196014	1	1	0	545.63	1633.87	3	1633.87	-0.0021	0	35.48	21	30	0.0021	R	HTGVMVGMGQK	D	2 Oxidation (M)	0.00001001000.0
3	Pavir.Ca00213.1.p|PACid:30205475	Pavir.Ca00213.1.p|PACid:30205475	8007	46652	435	435	25	25	56.2	5.31	196015	1	1	0	545.63	1633.87	3	1633.87	-0.0019	0	20.83	14	30	0.012	R	HTGVMVGMGQK	D	2 Oxidation (M)	0.00001001000.0
3	Pavir.Ca00213.1.p|PACid:30205475	Pavir.Ca00213.1.p|PACid:30205475	8007	46652	435	435	25	25	56.2	5.31	196016	1	1	0	545.63	1633.87	3	1633.87	-0.0019	0	25.42	15	30	0.0049	R	HTGVMVGMGQK	D	2 Oxidation (M)	0.00001001000.0
3	Pavir.Ca00213.1.p|PACid:30205475	Pavir.Ca00213.1.p|PACid:30205475	8007	46652	435	435	25	25	56.2	5.31	196018	1	1	0	545.63	1633.87	3	1633.87	-0.0019	0	32.72	18	30	0.0021	R	HTGVMVGMGQK	D	2 Oxidation (M)	0.00001001000.0
3	Pavir.Ca00213.1.p|PACid:30205475	Pavir.Ca00213.1.p|PACid:30205475	8007	46652	435	435	25	25	56.2	5.31	196019	1	1	0	545.63	1633.87	3	1633.87	-0.0019	0	25.65	22	30	0.023	R	HTGVMVGMGQK	D	2 Oxidation (M)	0.00001001000.0
3	Pavir.Ca00213.1.p|PACid:30205475	Pavir.Ca00213.1.p|PACid:30205475	8007	46652	435	435	25	25	56.2	5.31	196020	1	1	0	545.63	1633.87	3	1633.87	-0.0019	0	46.13	27	30	0.00063	R	HTGVMVGMGQK	D	2 Oxidation (M)	0.00001001000.0
3	Pavir.Ca00213.1.p|PACid:30205475	Pavir.Ca00213.1.p|PACid:30205475	8007	46652	435	435	25	25	56.2	5.31	196021	1	1	0	545.63	1633.87	3	1633.87	-0.0019	0	41.63	23	30	0.00074	R	HTGVMVGMGQK	D	2 Oxidation (M)	0.00001001000.0
3	Pavir.Ca00213.1.p|PACid:30205475	Pavir.Ca00213.1.p|PACid:30205475	8007	46652	435	435	25	25	56.2	5.31	196022	1	1	0	545.63	1633.87	3	1633.87	-0.0017	0	32.78	21	30	0.0034	R	HTGVMVGMGQK	D	2 Oxidation (M)	0.00001001000.0
3	Pavir.Ca00213.1.p|PACid:30205475	Pavir.Ca00213.1.p|PACid:30205475	8007	46652	435	435	25	25	56.2	5.31	196023	1	1	0	545.63	1633.87	3	1633.87	-0.0017	0	30.32	24	30	0.012	R	HTGVMVGMGQK	D	2 Oxidation (M)	0.00001001000.0
3	Pavir.Ca00213.1.p|PACid:30205475	Pavir.Ca00213.1.p|PACid:30205475	8007	46652	435	435	25	25	56.2	5.31	196027	1	1	0	545.63	1633.87	3	1633.87	-0.0015	0	15.98	13	30	0.032	R	HTGVMVGMGQK	D	2 Oxidation (M)	0.00001001000.0
3	Pavir.Ca00213.1.p|PACid:30205475	Pavir.Ca00213.1.p|PACid:30205475	8007	46652	435	435	25	25	56.2	5.31	196029	1	1	0	545.63	1633.87	3	1633.87	-0.0015	0	35.24	24	30	0.0046	R	HTGVMVGMGQK	D	2 Oxidation (M)	0.00001001000.0
3	Pavir.Ca00213.1.p|PACid:30205475	Pavir.Ca00213.1.p|PACid:30205475	8007	46652	435	435	25	25	56.2	5.31	196030	1	1	0	545.63	1633.87	3	1633.87	-0.0015	0	22.99	14	30	0.007	R	HTGVMVGMGQK	D	2 Oxidation (M)	0.00001001000.0
3	Pavir.Ca00213.1.p|PACid:30205475	Pavir.Ca00213.1.p|PACid:30205475	8007	46652	435	435	25	25	56.2	5.31	196031	1	1	0	545.63	1633.87	3	1633.87	-0.0015	0	36.37	17	30	0.0006	R	HTGVMVGMGQK	D	2 Oxidation (M)	0.00001001000.0
3	Pavir.Ca00213.1.p|PACid:30205475	Pavir.Ca00213.1.p|PACid:30205475	8007	46652	435	435	25	25	56.2	5.31	196032	1	1	0	545.63	1633.87	3	1633.87	-0.0015	0	27.37	14	30	0.0027	R	HTGVMVGMGQK	D	2 Oxidation (M)	0.00001001000.0
3	Pavir.Ca00213.1.p|PACid:30205475	Pavir.Ca00213.1.p|PACid:30205475	8007	46652	435	435	25	25	56.2	5.31	196035	1	1	0	545.63	1633.87	3	1633.87	-0.0013	0	32.6	17	30	0.0014	R	HTGVMVGMGQK	D	2 Oxidation (M)	0.00001001000.0
3	Pavir.Ca00213.1.p|PACid:30205475	Pavir.Ca00213.1.p|PACid:30205475	8007	46652	435	435	25	25	56.2	5.31	196036	1	1	0	545.63	1633.87	3	1633.87	-0.0013	0	31.04	24	30	0.01	R	HTGVMVGMGQK	D	2 Oxidation (M)	0.00001001000.0
3	Pavir.Ca00213.1.p|PACid:30205475	Pavir.Ca00213.1.p|PACid:30205475	8007	46652	435	435	25	25	56.2	5.31	196037	1	1	0	545.63	1633.87	3	1633.87	-0.0013	0	26.98	15	30	0.0034	R	HTGVMVGMGQK	D	2 Oxidation (M)	0.00001001000.0
3	Pavir.Ca00213.1.p|PACid:30205475	Pavir.Ca00213.1.p|PACid:30205475	8007	46652	435	435	25	25	56.2	5.31	196038	1	1	0	545.63	1633.87	3	1633.87	-0.0013	0	14.78	14	30	0.046	R	HTGVMVGMGQK	D	2 Oxidation (M)	0.00001001000.0
3	Pavir.Ca00213.1.p|PACid:30205475	Pavir.Ca00213.1.p|PACid:30205475	8007	46652	435	435	25	25	56.2	5.31	196040	1	1	0	545.63	1633.87	3	1633.87	-0.0012	0	29.4	23	30	0.011	R	HTGVMVGMGQK	D	2 Oxidation (M)	0.00001001000.0
3	Pavir.Ca00213.1.p|PACid:30205475	Pavir.Ca00213.1.p|PACid:30205475	8007	46652	435	435	25	25	56.2	5.31	196041	1	1	0	409.474	1633.87	4	1633.87	-0.0011	0	30.6	16	30	0.0018	R	HTGVMVGMGQK	D	2 Oxidation (M)	0.00001001000.0
3	Pavir.Ca00213.1.p|PACid:30205475	Pavir.Ca00213.1.p|PACid:30205475	8007	46652	435	435	25	25	56.2	5.31	196042	1	1	0	545.63	1633.87	3	1633.87	-0.001	0	38.86	22	30	0.0012	R	HTGVMVGMGQK	D	2 Oxidation (M)	0.00001001000.0
3	Pavir.Ca00213.1.p|PACid:30205475	Pavir.Ca00213.1.p|PACid:30205475	8007	46652	435	435	25	25	56.2	5.31	196043	1	1	0	545.63	1633.87	3	1633.87	-0.0008	0	23.42	14	30	0.0064	R	HTGVMVGMGQK	D	2 Oxidation (M)	0.00001001000.0
3	Pavir.Ca00213.1.p|PACid:30205475	Pavir.Ca00213.1.p|PACid:30205475	8007	46652	435	435	25	25	56.2	5.31	196045	1	1	0	545.63	1633.87	3	1633.87	-0.0008	0	32.65	24	30	0.0068	R	HTGVMVGMGQK	D	2 Oxidation (M)	0.00001001000.0
3	Pavir.Ca00213.1.p|PACid:30205475	Pavir.Ca00213.1.p|PACid:30205475	8007	46652	435	435	25	25	56.2	5.31	196046	1	1	0	545.63	1633.87	3	1633.87	-0.0008	0	25.74	16	30	0.0065	R	HTGVMVGMGQK	D	2 Oxidation (M)	0.00001001000.0
3	Pavir.Ca00213.1.p|PACid:30205475	Pavir.Ca00213.1.p|PACid:30205475	8007	46652	435	435	25	25	56.2	5.31	196047	1	1	0	545.63	1633.87	3	1633.87	-0.0008	0	29.85	24	30	0.014	R	HTGVMVGMGQK	D	2 Oxidation (M)	0.00001001000.0
3	Pavir.Ca00213.1.p|PACid:30205475	Pavir.Ca00213.1.p|PACid:30205475	8007	46652	435	435	25	25	56.2	5.31	196048	1	1	0	545.63	1633.87	3	1633.87	-0.0008	0	43.35	26	30	0.0011	R	HTGVMVGMGQK	D	2 Oxidation (M)	0.00001001000.0
3	Pavir.Ca00213.1.p|PACid:30205475	Pavir.Ca00213.1.p|PACid:30205475	8007	46652	435	435	25	25	56.2	5.31	196049	1	1	0	545.63	1633.87	3	1633.87	-0.0006	0	36.55	16	30	0.00049	R	HTGVMVGMGQK	D	2 Oxidation (M)	0.00001001000.0
3	Pavir.Ca00213.1.p|PACid:30205475	Pavir.Ca00213.1.p|PACid:30205475	8007	46652	435	435	25	25	56.2	5.31	196053	1	1	0	545.63	1633.87	3	1633.87	0	0	17.05	14	30	0.025	R	HTGVMVGMGQK	D	2 Oxidation (M)	0.00001001000.0
3	Pavir.Ca00213.1.p|PACid:30205475	Pavir.Ca00213.1.p|PACid:30205475	8007	46652	435	435	25	25	56.2	5.31	196055	1	1	0	545.63	1633.87	3	1633.87	0	0	22.71	18	30	0.019	R	HTGVMVGMGQK	D	2 Oxidation (M)	0.00001001000.0
3	Pavir.Ca00213.1.p|PACid:30205475	Pavir.Ca00213.1.p|PACid:30205475	8007	46652	435	435	25	25	56.2	5.31	196056	1	1	0	545.63	1633.87	3	1633.87	0.0001	0	29.74	18	30	0.0035	R	HTGVMVGMGQK	D	2 Oxidation (M)	0.00001001000.0
3	Pavir.Ca00213.1.p|PACid:30205475	Pavir.Ca00213.1.p|PACid:30205475	8007	46652	435	435	25	25	56.2	5.31	196429	1	1	0	545.957	1634.85	3	1634.85	-0.0034	0	29.2	15	29	0.0023	R	HTGVMVGMGQK	D	2 Oxidation (M); Deamidated (NQ)	0.00001001020.0
3	Pavir.Ca00213.1.p|PACid:30205475	Pavir.Ca00213.1.p|PACid:30205475	8007	46652	435	435	25	25	56.2	5.31	196432	1	1	0	545.957	1634.85	3	1634.85	-0.0026	0	29.25	21	29	0.0079	R	HTGVMVGMGQK	D	2 Oxidation (M); Deamidated (NQ)	0.00001001020.0
3	Pavir.Ca00213.1.p|PACid:30205475	Pavir.Ca00213.1.p|PACid:30205475	8007	46652	435	435	25	25	56.2	5.31	196434	1	1	0	545.958	1634.85	3	1634.85	-0.0004	0	23.97	14	29	0.0056	R	HTGVMVGMGQK	D	2 Oxidation (M); Deamidated (NQ)	0.00001001020.0
3	Pavir.Ca00213.1.p|PACid:30205475	Pavir.Ca00213.1.p|PACid:30205475	8007	46652	435	435	25	25	56.2	5.31	198285	1	1	0	547.621	1639.84	3	1639.85	-0.0035	0	27.39	24	29	0.023	K	DAYVGDEAQSK	R
3	Pavir.Ca00213.1.p|PACid:30205475	Pavir.Ca00213.1.p|PACid:30205475	8007	46652	435	435	25	25	56.2	5.31	198287	1	1	0	820.929	1639.84	2	1639.85	-0.003	0	66.3	27	29	6.7e-06	K	DAYVGDEAQSK	R
3	Pavir.Ca00213.1.p|PACid:30205475	Pavir.Ca00213.1.p|PACid:30205475	8007	46652	435	435	25	25	56.2	5.31	198288	1	1	0	547.622	1639.84	3	1639.85	-0.003	0	50.34	25	29	0.00018	K	DAYVGDEAQSK	R
3	Pavir.Ca00213.1.p|PACid:30205475	Pavir.Ca00213.1.p|PACid:30205475	8007	46652	435	435	25	25	56.2	5.31	198289	1	1	0	820.929	1639.84	2	1639.85	-0.0029	0	70.96		29	3.3e-06	K	DAYVGDEAQSK	R
3	Pavir.Ca00213.1.p|PACid:30205475	Pavir.Ca00213.1.p|PACid:30205475	8007	46652	435	435	25	25	56.2	5.31	198290	1	1	0	820.929	1639.84	2	1639.85	-0.0029	0	71.82		29	2.7e-06	K	DAYVGDEAQSK	R
3	Pavir.Ca00213.1.p|PACid:30205475	Pavir.Ca00213.1.p|PACid:30205475	8007	46652	435	435	25	25	56.2	5.31	198291	1	1	0	820.929	1639.84	2	1639.85	-0.0028	0	66.74	26	29	4.6e-06	K	DAYVGDEAQSK	R
3	Pavir.Ca00213.1.p|PACid:30205475	Pavir.Ca00213.1.p|PACid:30205475	8007	46652	435	435	25	25	56.2	5.31	198293	1	1	0	547.622	1639.84	3	1639.85	-0.0021	0	64.33		29	1.5e-05	K	DAYVGDEAQSK	R
3	Pavir.Ca00213.1.p|PACid:30205475	Pavir.Ca00213.1.p|PACid:30205475	8007	46652	435	435	25	25	56.2	5.31	198294	1	1	0	820.929	1639.84	2	1639.85	-0.0019	0	77		29	8.1e-07	K	DAYVGDEAQSK	R
3	Pavir.Ca00213.1.p|PACid:30205475	Pavir.Ca00213.1.p|PACid:30205475	8007	46652	435	435	25	25	56.2	5.31	198295	1	1	0	547.622	1639.84	3	1639.85	-0.0019	0	44.55	26	29	0.00084	K	DAYVGDEAQSK	R
3	Pavir.Ca00213.1.p|PACid:30205475	Pavir.Ca00213.1.p|PACid:30205475	8007	46652	435	435	25	25	56.2	5.31	198298	1	1	0	820.929	1639.84	2	1639.85	-0.0015	0	27.75	23	29	0.017	K	DAYVGDEAQSK	R
3	Pavir.Ca00213.1.p|PACid:30205475	Pavir.Ca00213.1.p|PACid:30205475	8007	46652	435	435	25	25	56.2	5.31	198299	1	1	0	820.929	1639.84	2	1639.85	-0.0015	0	60.35		29	3.8e-05	K	DAYVGDEAQSK	R
3	Pavir.Ca00213.1.p|PACid:30205475	Pavir.Ca00213.1.p|PACid:30205475	8007	46652	435	435	25	25	56.2	5.31	198656	1	1	0	821.42	1640.83	2	1640.83	-0.0047	0	34.24	15	28	0.00062	K	DAYVGDEAQSK	R	Deamidated (NQ)	0.00000000200.0
3	Pavir.Ca00213.1.p|PACid:30205475	Pavir.Ca00213.1.p|PACid:30205475	8007	46652	435	435	25	25	56.2	5.31	205226	1	1	1	553.615	1657.82	3	1657.83	-0.0042	0	57.46	17	27	5.2e-06	K	GEYDESGPAIVHR	K
3	Pavir.Ca00213.1.p|PACid:30205475	Pavir.Ca00213.1.p|PACid:30205475	8007	46652	435	435	25	25	56.2	5.31	205227	1	1	1	553.615	1657.82	3	1657.83	-0.0041	0	51.65	17	28	1.8e-05	K	GEYDESGPAIVHR	K
3	Pavir.Ca00213.1.p|PACid:30205475	Pavir.Ca00213.1.p|PACid:30205475	8007	46652	435	435	25	25	56.2	5.31	205228	1	1	1	553.615	1657.82	3	1657.83	-0.0037	0	59.8	22	28	8.4e-06	K	GEYDESGPAIVHR	K
3	Pavir.Ca00213.1.p|PACid:30205475	Pavir.Ca00213.1.p|PACid:30205475	8007	46652	435	435	25	25	56.2	5.31	205229	1	1	1	553.615	1657.82	3	1657.83	-0.0035	0	63.91	18	28	1.5e-06	K	GEYDESGPAIVHR	K
3	Pavir.Ca00213.1.p|PACid:30205475	Pavir.Ca00213.1.p|PACid:30205475	8007	46652	435	435	25	25	56.2	5.31	205230	1	1	1	553.615	1657.82	3	1657.83	-0.0033	0	55.5	16	28	6.2e-06	K	GEYDESGPAIVHR	K
3	Pavir.Ca00213.1.p|PACid:30205475	Pavir.Ca00213.1.p|PACid:30205475	8007	46652	435	435	25	25	56.2	5.31	205232	1	1	1	553.615	1657.82	3	1657.83	-0.003	0	57.82	18	28	5.4e-06	K	GEYDESGPAIVHR	K
3	Pavir.Ca00213.1.p|PACid:30205475	Pavir.Ca00213.1.p|PACid:30205475	8007	46652	435	435	25	25	56.2	5.31	205233	1	1	1	553.615	1657.82	3	1657.83	-0.003	0	57.69	16	28	3.9e-06	K	GEYDESGPAIVHR	K
3	Pavir.Ca00213.1.p|PACid:30205475	Pavir.Ca00213.1.p|PACid:30205475	8007	46652	435	435	25	25	56.2	5.31	205234	1	1	1	553.615	1657.82	3	1657.83	-0.0026	0	51.96	21	28	4.1e-05	K	GEYDESGPAIVHR	K
3	Pavir.Ca00213.1.p|PACid:30205475	Pavir.Ca00213.1.p|PACid:30205475	8007	46652	435	435	25	25	56.2	5.31	205235	1	1	1	829.92	1657.82	2	1657.83	-0.0017	0	84.04		28	1.3e-07	K	GEYDESGPAIVHR	K
3	Pavir.Ca00213.1.p|PACid:30205475	Pavir.Ca00213.1.p|PACid:30205475	8007	46652	435	435	25	25	56.2	5.31	258983	1	1	0	898.978	1795.94	2	1795.95	-0.005	1	52.51		30	0.00034	K	DAYVGDEAQSKR	G
3	Pavir.Ca00213.1.p|PACid:30205475	Pavir.Ca00213.1.p|PACid:30205475	8007	46652	435	435	25	25	56.2	5.31	258993	1	1	0	599.655	1795.94	3	1795.95	-0.0045	1	31.8	21	30	0.0048	K	DAYVGDEAQSKR	G
3	Pavir.Ca00213.1.p|PACid:30205475	Pavir.Ca00213.1.p|PACid:30205475	8007	46652	435	435	25	25	56.2	5.31	259005	1	1	0	898.979	1795.94	2	1795.95	-0.0039	1	44.65		30	0.0021	K	DAYVGDEAQSKR	G
3	Pavir.Ca00213.1.p|PACid:30205475	Pavir.Ca00213.1.p|PACid:30205475	8007	46652	435	435	25	25	56.2	5.31	259027	1	1	0	898.979	1795.94	2	1795.95	-0.0031	1	56.52		30	0.00013	K	DAYVGDEAQSKR	G
3	Pavir.Ca00213.1.p|PACid:30205475	Pavir.Ca00213.1.p|PACid:30205475	8007	46652	435	435	25	25	56.2	5.31	259036	1	1	0	599.655	1795.94	3	1795.95	-0.003	1	20.67	17	30	0.024	K	DAYVGDEAQSKR	G
3	Pavir.Ca00213.1.p|PACid:30205475	Pavir.Ca00213.1.p|PACid:30205475	8007	46652	435	435	25	25	56.2	5.31	259044	1	1	0	898.979	1795.94	2	1795.95	-0.0027	1	58.56		31	8.8e-05	K	DAYVGDEAQSKR	G
3	Pavir.Ca00213.1.p|PACid:30205475	Pavir.Ca00213.1.p|PACid:30205475	8007	46652	435	435	25	25	56.2	5.31	259066	1	1	0	599.655	1795.94	3	1795.95	-0.0025	1	34.97	21	31	0.002	K	DAYVGDEAQSKR	G
3	Pavir.Ca00213.1.p|PACid:30205475	Pavir.Ca00213.1.p|PACid:30205475	8007	46652	435	435	25	25	56.2	5.31	259077	1	1	0	599.655	1795.94	3	1795.95	-0.0023	1	28.88	14	30	0.002	K	DAYVGDEAQSKR	G
3	Pavir.Ca00213.1.p|PACid:30205475	Pavir.Ca00213.1.p|PACid:30205475	8007	46652	435	435	25	25	56.2	5.31	259084	1	1	0	599.656	1795.94	3	1795.95	-0.0021	1	15.3	14	30	0.042	K	DAYVGDEAQSKR	G
3	Pavir.Ca00213.1.p|PACid:30205475	Pavir.Ca00213.1.p|PACid:30205475	8007	46652	435	435	25	25	56.2	5.31	259102	1	1	0	599.656	1795.95	3	1795.95	-0.0017	1	23.11	15	30	0.009	K	DAYVGDEAQSKR	G
3	Pavir.Ca00213.1.p|PACid:30205475	Pavir.Ca00213.1.p|PACid:30205475	8007	46652	435	435	25	25	56.2	5.31	259103	1	1	0	599.656	1795.95	3	1795.95	-0.0017	1	41.2	16	30	0.00017	K	DAYVGDEAQSKR	G
3	Pavir.Ca00213.1.p|PACid:30205475	Pavir.Ca00213.1.p|PACid:30205475	8007	46652	435	435	25	25	56.2	5.31	259104	1	1	0	599.656	1795.95	3	1795.95	-0.0017	1	41.26	16	30	0.00019	K	DAYVGDEAQSKR	G
3	Pavir.Ca00213.1.p|PACid:30205475	Pavir.Ca00213.1.p|PACid:30205475	8007	46652	435	435	25	25	56.2	5.31	259105	1	1	0	599.656	1795.95	3	1795.95	-0.0017	1	39.47	18	30	0.00038	K	DAYVGDEAQSKR	G
3	Pavir.Ca00213.1.p|PACid:30205475	Pavir.Ca00213.1.p|PACid:30205475	8007	46652	435	435	25	25	56.2	5.31	259116	1	1	0	599.656	1795.95	3	1795.95	-0.0016	1	28.34	14	30	0.0022	K	DAYVGDEAQSKR	G
3	Pavir.Ca00213.1.p|PACid:30205475	Pavir.Ca00213.1.p|PACid:30205475	8007	46652	435	435	25	25	56.2	5.31	259128	1	1	0	599.656	1795.95	3	1795.95	-0.0008	1	41.4	19	30	0.00029	K	DAYVGDEAQSKR	G
3	Pavir.Ca00213.1.p|PACid:30205475	Pavir.Ca00213.1.p|PACid:30205475	8007	46652	435	435	25	25	56.2	5.31	259415	1	1	0	599.984	1796.93	3	1796.93	-0.0023	1	30.45	14	30	0.0014	K	DAYVGDEAQSKR	G	Deamidated (NQ)	0.000000002000.0
3	Pavir.Ca00213.1.p|PACid:30205475	Pavir.Ca00213.1.p|PACid:30205475	8007	46652	435	435	25	25	56.2	5.31	280707	1	1	0	620.333	1857.98	3	1857.98	-0.0028	1	17.95	14	30	0.021	R	GYSFTTTAEREIVR	D
3	Pavir.Ca00213.1.p|PACid:30205475	Pavir.Ca00213.1.p|PACid:30205475	8007	46652	435	435	25	25	56.2	5.31	319868	1	1	0	989.025	1976.04	2	1976.04	-0.0053	0	71.15	23	30	8.3e-07	K	SYELPDGQVITIGAER	F
3	Pavir.Ca00213.1.p|PACid:30205475	Pavir.Ca00213.1.p|PACid:30205475	8007	46652	435	435	25	25	56.2	5.31	319872	1	1	0	989.026	1976.04	2	1976.04	-0.005	0	18.52	14	30	0.018	K	SYELPDGQVITIGAER	F
3	Pavir.Ca00213.1.p|PACid:30205475	Pavir.Ca00213.1.p|PACid:30205475	8007	46652	435	435	25	25	56.2	5.31	319873	1	1	0	659.686	1976.04	3	1976.04	-0.0049	0	36.58	20	30	0.0012	K	SYELPDGQVITIGAER	F
3	Pavir.Ca00213.1.p|PACid:30205475	Pavir.Ca00213.1.p|PACid:30205475	8007	46652	435	435	25	25	56.2	5.31	319882	1	1	0	989.026	1976.04	2	1976.04	-0.0047	0	95.74	18	30	1.1e-09	K	SYELPDGQVITIGAER	F
3	Pavir.Ca00213.1.p|PACid:30205475	Pavir.Ca00213.1.p|PACid:30205475	8007	46652	435	435	25	25	56.2	5.31	319885	1	1	0	989.026	1976.04	2	1976.04	-0.0044	0	33.42	15	30	0.00073	K	SYELPDGQVITIGAER	F
3	Pavir.Ca00213.1.p|PACid:30205475	Pavir.Ca00213.1.p|PACid:30205475	8007	46652	435	435	25	25	56.2	5.31	319886	1	1	0	989.026	1976.04	2	1976.04	-0.0044	0	89.2	18	30	4.3e-09	K	SYELPDGQVITIGAER	F
3	Pavir.Ca00213.1.p|PACid:30205475	Pavir.Ca00213.1.p|PACid:30205475	8007	46652	435	435	25	25	56.2	5.31	319887	1	1	0	659.686	1976.04	3	1976.04	-0.0044	0	14.07	13	30	0.048	K	SYELPDGQVITIGAER	F
3	Pavir.Ca00213.1.p|PACid:30205475	Pavir.Ca00213.1.p|PACid:30205475	8007	46652	435	435	25	25	56.2	5.31	319888	1	1	0	989.026	1976.04	2	1976.04	-0.0042	0	72.67	17	30	1.5e-07	K	SYELPDGQVITIGAER	F
3	Pavir.Ca00213.1.p|PACid:30205475	Pavir.Ca00213.1.p|PACid:30205475	8007	46652	435	435	25	25	56.2	5.31	319889	1	1	0	989.026	1976.04	2	1976.04	-0.0042	0	73.33	17	30	1.3e-07	K	SYELPDGQVITIGAER	F
3	Pavir.Ca00213.1.p|PACid:30205475	Pavir.Ca00213.1.p|PACid:30205475	8007	46652	435	435	25	25	56.2	5.31	319891	1	1	0	989.026	1976.04	2	1976.04	-0.0041	0	46.45	16	30	5.2e-05	K	SYELPDGQVITIGAER	F
3	Pavir.Ca00213.1.p|PACid:30205475	Pavir.Ca00213.1.p|PACid:30205475	8007	46652	435	435	25	25	56.2	5.31	319899	1	1	0	989.026	1976.04	2	1976.04	-0.0039	0	17.51	14	30	0.023	K	SYELPDGQVITIGAER	F
3	Pavir.Ca00213.1.p|PACid:30205475	Pavir.Ca00213.1.p|PACid:30205475	8007	46652	435	435	25	25	56.2	5.31	319902	1	1	0	989.026	1976.04	2	1976.04	-0.0038	0	88.62	18	30	4.9e-09	K	SYELPDGQVITIGAER	F
3	Pavir.Ca00213.1.p|PACid:30205475	Pavir.Ca00213.1.p|PACid:30205475	8007	46652	435	435	25	25	56.2	5.31	319903	1	1	0	989.026	1976.04	2	1976.04	-0.0038	0	95.07	18	30	1.2e-09	K	SYELPDGQVITIGAER	F
3	Pavir.Ca00213.1.p|PACid:30205475	Pavir.Ca00213.1.p|PACid:30205475	8007	46652	435	435	25	25	56.2	5.31	319904	1	1	0	989.026	1976.04	2	1976.04	-0.0037	0	52.97	16	30	1.1e-05	K	SYELPDGQVITIGAER	F
3	Pavir.Ca00213.1.p|PACid:30205475	Pavir.Ca00213.1.p|PACid:30205475	8007	46652	435	435	25	25	56.2	5.31	319906	1	1	0	989.026	1976.04	2	1976.04	-0.0037	0	58.15	16	30	3.5e-06	K	SYELPDGQVITIGAER	F
3	Pavir.Ca00213.1.p|PACid:30205475	Pavir.Ca00213.1.p|PACid:30205475	8007	46652	435	435	25	25	56.2	5.31	319908	1	1	0	989.026	1976.04	2	1976.04	-0.0037	0	47.87	15	30	3.2e-05	K	SYELPDGQVITIGAER	F
3	Pavir.Ca00213.1.p|PACid:30205475	Pavir.Ca00213.1.p|PACid:30205475	8007	46652	435	435	25	25	56.2	5.31	319911	1	1	0	659.687	1976.04	3	1976.04	-0.0036	0	39.81	15	30	0.00018	K	SYELPDGQVITIGAER	F
3	Pavir.Ca00213.1.p|PACid:30205475	Pavir.Ca00213.1.p|PACid:30205475	8007	46652	435	435	25	25	56.2	5.31	319912	1	1	0	659.687	1976.04	3	1976.04	-0.0036	0	32.15	15	30	0.00097	K	SYELPDGQVITIGAER	F
3	Pavir.Ca00213.1.p|PACid:30205475	Pavir.Ca00213.1.p|PACid:30205475	8007	46652	435	435	25	25	56.2	5.31	319914	1	1	0	989.026	1976.04	2	1976.04	-0.0036	0	36.49	15	30	0.00038	K	SYELPDGQVITIGAER	F
3	Pavir.Ca00213.1.p|PACid:30205475	Pavir.Ca00213.1.p|PACid:30205475	8007	46652	435	435	25	25	56.2	5.31	319918	1	1	0	989.026	1976.04	2	1976.04	-0.0034	0	88.62	18	30	5.1e-09	K	SYELPDGQVITIGAER	F
3	Pavir.Ca00213.1.p|PACid:30205475	Pavir.Ca00213.1.p|PACid:30205475	8007	46652	435	435	25	25	56.2	5.31	319921	1	1	0	989.027	1976.04	2	1976.04	-0.0033	0	21.45	14	30	0.0097	K	SYELPDGQVITIGAER	F
3	Pavir.Ca00213.1.p|PACid:30205475	Pavir.Ca00213.1.p|PACid:30205475	8007	46652	435	435	25	25	56.2	5.31	319922	1	1	0	989.027	1976.04	2	1976.04	-0.0033	0	55.87	18	30	9.4e-06	K	SYELPDGQVITIGAER	F
3	Pavir.Ca00213.1.p|PACid:30205475	Pavir.Ca00213.1.p|PACid:30205475	8007	46652	435	435	25	25	56.2	5.31	319923	1	1	0	989.027	1976.04	2	1976.04	-0.0033	0	75.63	19	30	1.1e-07	K	SYELPDGQVITIGAER	F
3	Pavir.Ca00213.1.p|PACid:30205475	Pavir.Ca00213.1.p|PACid:30205475	8007	46652	435	435	25	25	56.2	5.31	319929	1	1	0	989.027	1976.04	2	1976.04	-0.0032	0	34.12	15	30	0.00072	K	SYELPDGQVITIGAER	F
3	Pavir.Ca00213.1.p|PACid:30205475	Pavir.Ca00213.1.p|PACid:30205475	8007	46652	435	435	25	25	56.2	5.31	319930	1	1	0	989.027	1976.04	2	1976.04	-0.0032	0	21.65	14	30	0.0093	K	SYELPDGQVITIGAER	F
3	Pavir.Ca00213.1.p|PACid:30205475	Pavir.Ca00213.1.p|PACid:30205475	8007	46652	435	435	25	25	56.2	5.31	319931	1	1	0	989.027	1976.04	2	1976.04	-0.0032	0	27.75	15	30	0.0028	K	SYELPDGQVITIGAER	F
3	Pavir.Ca00213.1.p|PACid:30205475	Pavir.Ca00213.1.p|PACid:30205475	8007	46652	435	435	25	25	56.2	5.31	319932	1	1	0	659.687	1976.04	3	1976.04	-0.0031	0	35.22	15	30	0.00051	K	SYELPDGQVITIGAER	F
3	Pavir.Ca00213.1.p|PACid:30205475	Pavir.Ca00213.1.p|PACid:30205475	8007	46652	435	435	25	25	56.2	5.31	319933	1	1	0	659.687	1976.04	3	1976.04	-0.0031	0	48.92	16	30	2.6e-05	K	SYELPDGQVITIGAER	F
3	Pavir.Ca00213.1.p|PACid:30205475	Pavir.Ca00213.1.p|PACid:30205475	8007	46652	435	435	25	25	56.2	5.31	319934	1	1	0	659.687	1976.04	3	1976.04	-0.0031	0	29.35	14	30	0.0018	K	SYELPDGQVITIGAER	F
3	Pavir.Ca00213.1.p|PACid:30205475	Pavir.Ca00213.1.p|PACid:30205475	8007	46652	435	435	25	25	56.2	5.31	319935	1	1	0	659.687	1976.04	3	1976.04	-0.0031	0	61.46	20	30	3.7e-06	K	SYELPDGQVITIGAER	F
3	Pavir.Ca00213.1.p|PACid:30205475	Pavir.Ca00213.1.p|PACid:30205475	8007	46652	435	435	25	25	56.2	5.31	319940	1	1	0	989.027	1976.04	2	1976.04	-0.003	0	41.31	16	30	0.00017	K	SYELPDGQVITIGAER	F
3	Pavir.Ca00213.1.p|PACid:30205475	Pavir.Ca00213.1.p|PACid:30205475	8007	46652	435	435	25	25	56.2	5.31	319942	1	1	0	659.687	1976.04	3	1976.04	-0.0029	0	36.3	15	30	0.00046	K	SYELPDGQVITIGAER	F
3	Pavir.Ca00213.1.p|PACid:30205475	Pavir.Ca00213.1.p|PACid:30205475	8007	46652	435	435	25	25	56.2	5.31	319943	1	1	0	659.687	1976.04	3	1976.04	-0.0029	0	54.2	19	30	1.5e-05	K	SYELPDGQVITIGAER	F
3	Pavir.Ca00213.1.p|PACid:30205475	Pavir.Ca00213.1.p|PACid:30205475	8007	46652	435	435	25	25	56.2	5.31	319945	1	1	0	659.687	1976.04	3	1976.04	-0.0027	0	58.99	17	30	3.3e-06	K	SYELPDGQVITIGAER	F
3	Pavir.Ca00213.1.p|PACid:30205475	Pavir.Ca00213.1.p|PACid:30205475	8007	46652	435	435	25	25	56.2	5.31	319946	1	1	0	989.027	1976.04	2	1976.04	-0.0027	0	28.54	14	30	0.0021	K	SYELPDGQVITIGAER	F
3	Pavir.Ca00213.1.p|PACid:30205475	Pavir.Ca00213.1.p|PACid:30205475	8007	46652	435	435	25	25	56.2	5.31	319947	1	1	0	989.027	1976.04	2	1976.04	-0.0027	0	106.33	20	30	1.2e-10	K	SYELPDGQVITIGAER	F
3	Pavir.Ca00213.1.p|PACid:30205475	Pavir.Ca00213.1.p|PACid:30205475	8007	46652	435	435	25	25	56.2	5.31	319948	1	1	0	989.027	1976.04	2	1976.04	-0.0027	0	77.91	17	30	5e-08	K	SYELPDGQVITIGAER	F
3	Pavir.Ca00213.1.p|PACid:30205475	Pavir.Ca00213.1.p|PACid:30205475	8007	46652	435	435	25	25	56.2	5.31	319950	1	1	0	659.687	1976.04	3	1976.04	-0.0025	0	53.25	24	30	6.3e-05	K	SYELPDGQVITIGAER	F
3	Pavir.Ca00213.1.p|PACid:30205475	Pavir.Ca00213.1.p|PACid:30205475	8007	46652	435	435	25	25	56.2	5.31	319951	1	1	0	659.687	1976.04	3	1976.04	-0.0025	0	49.1	16	30	2.7e-05	K	SYELPDGQVITIGAER	F
3	Pavir.Ca00213.1.p|PACid:30205475	Pavir.Ca00213.1.p|PACid:30205475	8007	46652	435	435	25	25	56.2	5.31	319954	1	1	0	989.027	1976.04	2	1976.04	-0.0025	0	35.76	15	30	0.00047	K	SYELPDGQVITIGAER	F
3	Pavir.Ca00213.1.p|PACid:30205475	Pavir.Ca00213.1.p|PACid:30205475	8007	46652	435	435	25	25	56.2	5.31	319956	1	1	0	659.687	1976.04	3	1976.04	-0.0024	0	50.92	19	30	3.4e-05	K	SYELPDGQVITIGAER	F
3	Pavir.Ca00213.1.p|PACid:30205475	Pavir.Ca00213.1.p|PACid:30205475	8007	46652	435	435	25	25	56.2	5.31	319957	1	1	0	659.687	1976.04	3	1976.04	-0.0024	0	70.5	17	30	2.6e-07	K	SYELPDGQVITIGAER	F
3	Pavir.Ca00213.1.p|PACid:30205475	Pavir.Ca00213.1.p|PACid:30205475	8007	46652	435	435	25	25	56.2	5.31	319958	1	1	0	659.687	1976.04	3	1976.04	-0.0024	0	62.1	23	30	7.5e-06	K	SYELPDGQVITIGAER	F
3	Pavir.Ca00213.1.p|PACid:30205475	Pavir.Ca00213.1.p|PACid:30205475	8007	46652	435	435	25	25	56.2	5.31	319970	1	1	0	659.687	1976.04	3	1976.04	-0.0018	0	69.12	20	30	6.5e-07	K	SYELPDGQVITIGAER	F
3	Pavir.Ca00213.1.p|PACid:30205475	Pavir.Ca00213.1.p|PACid:30205475	8007	46652	435	435	25	25	56.2	5.31	319971	1	1	0	989.027	1976.04	2	1976.04	-0.0017	0	40.29	15	30	0.00017	K	SYELPDGQVITIGAER	F
3	Pavir.Ca00213.1.p|PACid:30205475	Pavir.Ca00213.1.p|PACid:30205475	8007	46652	435	435	25	25	56.2	5.31	319977	1	1	0	659.687	1976.04	3	1976.04	-0.0013	0	65.35	24	30	4.1e-06	K	SYELPDGQVITIGAER	F
3	Pavir.Ca00213.1.p|PACid:30205475	Pavir.Ca00213.1.p|PACid:30205475	8007	46652	435	435	25	25	56.2	5.31	319981	1	1	0	989.028	1976.04	2	1976.04	-0.0011	0	36.94	15	30	0.00034	K	SYELPDGQVITIGAER	F
3	Pavir.Ca00213.1.p|PACid:30205475	Pavir.Ca00213.1.p|PACid:30205475	8007	46652	435	435	25	25	56.2	5.31	319983	1	1	0	989.028	1976.04	2	1976.04	-0.0004	0	19.63	14	30	0.014	K	SYELPDGQVITIGAER	F
3	Pavir.Ca00213.1.p|PACid:30205475	Pavir.Ca00213.1.p|PACid:30205475	8007	46652	435	435	25	25	56.2	5.31	319984	1	1	0	659.688	1976.04	3	1976.04	-0.0004	0	35.21	17	30	0.00084	K	SYELPDGQVITIGAER	F
3	Pavir.Ca00213.1.p|PACid:30205475	Pavir.Ca00213.1.p|PACid:30205475	8007	46652	435	435	25	25	56.2	5.31	319990	1	1	0	659.689	1976.04	3	1976.04	0.0022	0	19.63	14	30	0.014	K	SYELPDGQVITIGAER	F
3	Pavir.Ca00213.1.p|PACid:30205475	Pavir.Ca00213.1.p|PACid:30205475	8007	46652	435	435	25	25	56.2	5.31	320314	1	1	0	660.014	1977.02	3	1977.03	-0.0069	0	28.62	22	30	0.011	K	SYELPDGQVITIGAER	F	Deamidated (NQ)	0.0000000200000000.0
3	Pavir.Ca00213.1.p|PACid:30205475	Pavir.Ca00213.1.p|PACid:30205475	8007	46652	435	435	25	25	56.2	5.31	320317	1	1	0	660.014	1977.02	3	1977.03	-0.0056	0	14.66	14	30	0.043	K	SYELPDGQVITIGAER	F	Deamidated (NQ)	0.0000000200000000.0
3	Pavir.Ca00213.1.p|PACid:30205475	Pavir.Ca00213.1.p|PACid:30205475	8007	46652	435	435	25	25	56.2	5.31	320318	1	1	0	660.014	1977.02	3	1977.03	-0.0051	0	31.14	14	30	0.0012	K	SYELPDGQVITIGAER	F	Deamidated (NQ)	0.0000000200000000.0
3	Pavir.Ca00213.1.p|PACid:30205475	Pavir.Ca00213.1.p|PACid:30205475	8007	46652	435	435	25	25	56.2	5.31	320322	1	1	0	989.519	1977.02	2	1977.03	-0.0032	0	19.44	14	30	0.018	K	SYELPDGQVITIGAER	F	Deamidated (NQ)	0.0000000200000000.0
3	Pavir.Ca00213.1.p|PACid:30205475	Pavir.Ca00213.1.p|PACid:30205475	8007	46652	435	435	25	25	56.2	5.31	320323	1	1	0	989.519	1977.02	2	1977.03	-0.0031	0	18.62	14	30	0.018	K	SYELPDGQVITIGAER	F	Deamidated (NQ)	0.0000000200000000.0
3	Pavir.Ca00213.1.p|PACid:30205475	Pavir.Ca00213.1.p|PACid:30205475	8007	46652	435	435	25	25	56.2	5.31	320353	1	1	0	660.021	1977.04	3	1977.03	0.015	0	21.06	14	30	0.012	K	SYELPDGQVITIGAER	F	Deamidated (NQ)	0.0000000200000000.0
3	Pavir.Ca00213.1.p|PACid:30205475	Pavir.Ca00213.1.p|PACid:30205475	8007	46652	435	435	25	25	56.2	5.31	320354	1	1	0	660.021	1977.04	3	1977.03	0.0152	0	24.97	14	30	0.005	K	SYELPDGQVITIGAER	F	Deamidated (NQ)	0.0000000200000000.0
3	Pavir.Ca00213.1.p|PACid:30205475	Pavir.Ca00213.1.p|PACid:30205475	8007	46652	435	435	25	25	56.2	5.31	332931	1	1	1	504.778	2015.08	4	2015.08	-0.0015	1	26.72	14	30	0.0031	K	GEYDESGPAIVHRK	C
3	Pavir.Ca00213.1.p|PACid:30205475	Pavir.Ca00213.1.p|PACid:30205475	8007	46652	435	435	25	25	56.2	5.31	380986	1	1	0	733.088	2196.24	3	2196.25	-0.0041	1	37.26	21	31	0.0014	R	MSKEITALAPSSMK	I	Oxidation (M)	0.10000000000000.0
3	Pavir.Ca00213.1.p|PACid:30205475	Pavir.Ca00213.1.p|PACid:30205475	8007	46652	435	435	25	25	56.2	5.31	380988	1	1	0	733.088	2196.24	3	2196.25	-0.0035	1	16.17	14	31	0.03	R	MSKEITALAPSSMK	I	Oxidation (M)	0.10000000000000.0
3	Pavir.Ca00213.1.p|PACid:30205475	Pavir.Ca00213.1.p|PACid:30205475	8007	46652	435	435	25	25	56.2	5.31	380989	1	1	0	733.088	2196.24	3	2196.25	-0.0033	1	20.01	14	31	0.013	R	MSKEITALAPSSMK	I	Oxidation (M)	0.00000000000010.0
3	Pavir.Ca00213.1.p|PACid:30205475	Pavir.Ca00213.1.p|PACid:30205475	8007	46652	435	435	25	25	56.2	5.31	380991	1	1	0	733.088	2196.24	3	2196.25	-0.0029	1	24.51	21	31	0.028	R	MSKEITALAPSSMK	I	Oxidation (M)	0.10000000000000.0
3	Pavir.Ca00213.1.p|PACid:30205475	Pavir.Ca00213.1.p|PACid:30205475	8007	46652	435	435	25	25	56.2	5.31	380993	1	1	0	550.068	2196.24	4	2196.25	-0.0018	1	21.44	14	30	0.0097	R	MSKEITALAPSSMK	I	Oxidation (M)	0.00000000000010.0
3	Pavir.Ca00213.1.p|PACid:30205475	Pavir.Ca00213.1.p|PACid:30205475	8007	46652	435	435	25	25	56.2	5.31	384564	1	1	0	738.419	2212.24	3	2212.24	-0.0052	1	16.29	14	31	0.03	R	MSKEITALAPSSMK	I	2 Oxidation (M)	0.10000000000010.0
3	Pavir.Ca00213.1.p|PACid:30205475	Pavir.Ca00213.1.p|PACid:30205475	8007	46652	435	435	25	25	56.2	5.31	384567	1	1	0	554.067	2212.24	4	2212.24	-0.0043	1	24.87	23	30	0.039	R	MSKEITALAPSSMK	I	2 Oxidation (M)	0.10000000000010.0
3	Pavir.Ca00213.1.p|PACid:30205475	Pavir.Ca00213.1.p|PACid:30205475	8007	46652	435	435	25	25	56.2	5.31	384568	1	1	0	738.42	2212.24	3	2212.24	-0.0041	1	18.41	15	30	0.028	R	MSKEITALAPSSMK	I	2 Oxidation (M)	0.10000000000010.0
3	Pavir.Ca00213.1.p|PACid:30205475	Pavir.Ca00213.1.p|PACid:30205475	8007	46652	435	435	25	25	56.2	5.31	384570	1	1	0	738.42	2212.24	3	2212.24	-0.0038	1	29.86	19	30	0.0042	R	MSKEITALAPSSMK	I	2 Oxidation (M)	0.10000000000010.0
3	Pavir.Ca00213.1.p|PACid:30205475	Pavir.Ca00213.1.p|PACid:30205475	8007	46652	435	435	25	25	56.2	5.31	384571	1	1	0	738.42	2212.24	3	2212.24	-0.0036	1	18.17	14	30	0.02	R	MSKEITALAPSSMK	I	2 Oxidation (M)	0.10000000000010.0
3	Pavir.Ca00213.1.p|PACid:30205475	Pavir.Ca00213.1.p|PACid:30205475	8007	46652	435	435	25	25	56.2	5.31	384573	1	1	0	738.42	2212.24	3	2212.24	-0.0027	1	20.52	14	30	0.012	R	MSKEITALAPSSMK	I	2 Oxidation (M)	0.10000000000010.0
3	Pavir.Ca00213.1.p|PACid:30205475	Pavir.Ca00213.1.p|PACid:30205475	8007	46652	435	435	25	25	56.2	5.31	406414	1	1	0	772.089	2313.25	3	2313.25	-0.0052	0	34.47	15	31	0.00062	K	LAYVALDYEQELETAK	T
3	Pavir.Ca00213.1.p|PACid:30205475	Pavir.Ca00213.1.p|PACid:30205475	8007	46652	435	435	25	25	56.2	5.31	420632	1	1	0	797.739	2390.19	3	2390.2	-0.0039	0	75.1	17	30	9.1e-08	K	YPIEHGIVSNWDDMEK	I
3	Pavir.Ca00213.1.p|PACid:30205475	Pavir.Ca00213.1.p|PACid:30205475	8007	46652	435	435	25	25	56.2	5.31	420633	1	1	0	797.74	2390.2	3	2390.2	-0.0012	0	68.87	17	30	3.5e-07	K	YPIEHGIVSNWDDMEK	I
3	Pavir.Ca00213.1.p|PACid:30205475	Pavir.Ca00213.1.p|PACid:30205475	8007	46652	435	435	25	25	56.2	5.31	423581	1	1	0	803.069	2406.19	3	2406.19	-0.0068	0	25.49	14	29	0.0041	K	YPIEHGIVSNWDDMEK	I	Oxidation (M)	0.0000000000000100.0
3	Pavir.Ca00213.1.p|PACid:30205475	Pavir.Ca00213.1.p|PACid:30205475	8007	46652	435	435	25	25	56.2	5.31	423582	1	1	0	803.07	2406.19	3	2406.19	-0.0044	0	39.54	15	29	0.0002	K	YPIEHGIVSNWDDMEK	I	Oxidation (M)	0.0000000000000100.0
3	Pavir.Ca00213.1.p|PACid:30205475	Pavir.Ca00213.1.p|PACid:30205475	8007	46652	435	435	25	25	56.2	5.31	423584	1	1	0	602.555	2406.19	4	2406.19	-0.0035	0	46.09	15	29	4.8e-05	K	YPIEHGIVSNWDDMEK	I	Oxidation (M)	0.0000000000000100.0
3	Pavir.Ca00213.1.p|PACid:30205475	Pavir.Ca00213.1.p|PACid:30205475	8007	46652	435	435	25	25	56.2	5.31	423585	1	1	0	803.071	2406.19	3	2406.19	-0.0033	0	38.01	15	29	0.00027	K	YPIEHGIVSNWDDMEK	I	Oxidation (M)	0.0000000000000100.0
3	Pavir.Ca00213.1.p|PACid:30205475	Pavir.Ca00213.1.p|PACid:30205475	8007	46652	435	435	25	25	56.2	5.31	424658	1	1	0	1206.69	2411.38	2	2411.38	-0.0079	0	56.68	18	30	6.9e-06	R	VAPEEHPVLLTEAPLNPK	A
3	Pavir.Ca00213.1.p|PACid:30205475	Pavir.Ca00213.1.p|PACid:30205475	8007	46652	435	435	25	25	56.2	5.31	424662	1	1	0	804.799	2411.38	3	2411.38	-0.007	0	60.94	16	30	1.9e-06	R	VAPEEHPVLLTEAPLNPK	A
3	Pavir.Ca00213.1.p|PACid:30205475	Pavir.Ca00213.1.p|PACid:30205475	8007	46652	435	435	25	25	56.2	5.31	424666	1	1	0	804.799	2411.38	3	2411.38	-0.0065	0	21.06	15	30	0.013	R	VAPEEHPVLLTEAPLNPK	A
3	Pavir.Ca00213.1.p|PACid:30205475	Pavir.Ca00213.1.p|PACid:30205475	8007	46652	435	435	25	25	56.2	5.31	424672	1	1	0	804.8	2411.38	3	2411.38	-0.0058	0	21.84	17	30	0.02	R	VAPEEHPVLLTEAPLNPK	A
3	Pavir.Ca00213.1.p|PACid:30205475	Pavir.Ca00213.1.p|PACid:30205475	8007	46652	435	435	25	25	56.2	5.31	424674	1	1	0	804.8	2411.38	3	2411.38	-0.0056	0	48.73	16	30	3.3e-05	R	VAPEEHPVLLTEAPLNPK	A
3	Pavir.Ca00213.1.p|PACid:30205475	Pavir.Ca00213.1.p|PACid:30205475	8007	46652	435	435	25	25	56.2	5.31	424682	1	1	0	804.8	2411.38	3	2411.38	-0.0052	0	25.21	14	30	0.0043	R	VAPEEHPVLLTEAPLNPK	A
3	Pavir.Ca00213.1.p|PACid:30205475	Pavir.Ca00213.1.p|PACid:30205475	8007	46652	435	435	25	25	56.2	5.31	424683	1	1	0	804.8	2411.38	3	2411.38	-0.0052	0	44.24	15	30	7.1e-05	R	VAPEEHPVLLTEAPLNPK	A
3	Pavir.Ca00213.1.p|PACid:30205475	Pavir.Ca00213.1.p|PACid:30205475	8007	46652	435	435	25	25	56.2	5.31	424689	1	1	0	804.8	2411.38	3	2411.38	-0.005	0	64.59	17	30	8.8e-07	R	VAPEEHPVLLTEAPLNPK	A
3	Pavir.Ca00213.1.p|PACid:30205475	Pavir.Ca00213.1.p|PACid:30205475	8007	46652	435	435	25	25	56.2	5.31	424692	1	1	0	804.8	2411.38	3	2411.38	-0.0048	0	46.01	16	30	5.1e-05	R	VAPEEHPVLLTEAPLNPK	A
3	Pavir.Ca00213.1.p|PACid:30205475	Pavir.Ca00213.1.p|PACid:30205475	8007	46652	435	435	25	25	56.2	5.31	424693	1	1	0	804.8	2411.38	3	2411.38	-0.0048	0	58.65	16	30	3.2e-06	R	VAPEEHPVLLTEAPLNPK	A
3	Pavir.Ca00213.1.p|PACid:30205475	Pavir.Ca00213.1.p|PACid:30205475	8007	46652	435	435	25	25	56.2	5.31	424694	1	1	0	804.8	2411.38	3	2411.38	-0.0046	0	56.13	16	30	5.5e-06	R	VAPEEHPVLLTEAPLNPK	A
3	Pavir.Ca00213.1.p|PACid:30205475	Pavir.Ca00213.1.p|PACid:30205475	8007	46652	435	435	25	25	56.2	5.31	424695	1	1	0	804.8	2411.38	3	2411.38	-0.0046	0	45.34	15	30	5.6e-05	R	VAPEEHPVLLTEAPLNPK	A
3	Pavir.Ca00213.1.p|PACid:30205475	Pavir.Ca00213.1.p|PACid:30205475	8007	46652	435	435	25	25	56.2	5.31	424697	1	1	0	603.852	2411.38	4	2411.38	-0.0046	0	23.15	18	30	0.017	R	VAPEEHPVLLTEAPLNPK	A
3	Pavir.Ca00213.1.p|PACid:30205475	Pavir.Ca00213.1.p|PACid:30205475	8007	46652	435	435	25	25	56.2	5.31	424698	1	1	0	603.852	2411.38	4	2411.38	-0.0046	0	32.41	15	30	0.0011	R	VAPEEHPVLLTEAPLNPK	A
3	Pavir.Ca00213.1.p|PACid:30205475	Pavir.Ca00213.1.p|PACid:30205475	8007	46652	435	435	25	25	56.2	5.31	424699	1	1	0	603.852	2411.38	4	2411.38	-0.0046	0	28.91	20	30	0.0073	R	VAPEEHPVLLTEAPLNPK	A
3	Pavir.Ca00213.1.p|PACid:30205475	Pavir.Ca00213.1.p|PACid:30205475	8007	46652	435	435	25	25	56.2	5.31	424702	1	1	0	804.8	2411.38	3	2411.38	-0.0045	0	32.39	17	30	0.0017	R	VAPEEHPVLLTEAPLNPK	A
3	Pavir.Ca00213.1.p|PACid:30205475	Pavir.Ca00213.1.p|PACid:30205475	8007	46652	435	435	25	25	56.2	5.31	424703	1	1	0	804.8	2411.38	3	2411.38	-0.0045	0	48.08	18	30	5e-05	R	VAPEEHPVLLTEAPLNPK	A
3	Pavir.Ca00213.1.p|PACid:30205475	Pavir.Ca00213.1.p|PACid:30205475	8007	46652	435	435	25	25	56.2	5.31	424704	1	1	0	804.8	2411.38	3	2411.38	-0.0045	0	37.49	17	30	0.00054	R	VAPEEHPVLLTEAPLNPK	A
3	Pavir.Ca00213.1.p|PACid:30205475	Pavir.Ca00213.1.p|PACid:30205475	8007	46652	435	435	25	25	56.2	5.31	424705	1	1	0	804.8	2411.38	3	2411.38	-0.0045	0	38.46	15	30	0.00025	R	VAPEEHPVLLTEAPLNPK	A
3	Pavir.Ca00213.1.p|PACid:30205475	Pavir.Ca00213.1.p|PACid:30205475	8007	46652	435	435	25	25	56.2	5.31	424706	1	1	0	1206.7	2411.38	2	2411.38	-0.0045	0	23.27	15	30	0.0092	R	VAPEEHPVLLTEAPLNPK	A
3	Pavir.Ca00213.1.p|PACid:30205475	Pavir.Ca00213.1.p|PACid:30205475	8007	46652	435	435	25	25	56.2	5.31	424711	1	1	0	804.8	2411.38	3	2411.38	-0.0043	0	50.04	16	30	2e-05	R	VAPEEHPVLLTEAPLNPK	A
3	Pavir.Ca00213.1.p|PACid:30205475	Pavir.Ca00213.1.p|PACid:30205475	8007	46652	435	435	25	25	56.2	5.31	424712	1	1	0	804.8	2411.38	3	2411.38	-0.0043	0	33.95	15	30	0.00065	R	VAPEEHPVLLTEAPLNPK	A
3	Pavir.Ca00213.1.p|PACid:30205475	Pavir.Ca00213.1.p|PACid:30205475	8007	46652	435	435	25	25	56.2	5.31	424713	1	1	0	804.8	2411.38	3	2411.38	-0.0043	0	51.85	16	30	1.4e-05	R	VAPEEHPVLLTEAPLNPK	A
3	Pavir.Ca00213.1.p|PACid:30205475	Pavir.Ca00213.1.p|PACid:30205475	8007	46652	435	435	25	25	56.2	5.31	424715	1	1	0	804.8	2411.38	3	2411.38	-0.0041	0	57.08	16	30	4.4e-06	R	VAPEEHPVLLTEAPLNPK	A
3	Pavir.Ca00213.1.p|PACid:30205475	Pavir.Ca00213.1.p|PACid:30205475	8007	46652	435	435	25	25	56.2	5.31	424716	1	1	0	804.8	2411.38	3	2411.38	-0.0041	0	37.43	15	30	0.00031	R	VAPEEHPVLLTEAPLNPK	A
3	Pavir.Ca00213.1.p|PACid:30205475	Pavir.Ca00213.1.p|PACid:30205475	8007	46652	435	435	25	25	56.2	5.31	424717	1	1	0	804.8	2411.38	3	2411.38	-0.0041	0	45.2	15	30	5.8e-05	R	VAPEEHPVLLTEAPLNPK	A
3	Pavir.Ca00213.1.p|PACid:30205475	Pavir.Ca00213.1.p|PACid:30205475	8007	46652	435	435	25	25	56.2	5.31	424718	1	1	0	483.283	2411.38	5	2411.38	-0.0041	0	21.8	19	30	0.027	R	VAPEEHPVLLTEAPLNPK	A
3	Pavir.Ca00213.1.p|PACid:30205475	Pavir.Ca00213.1.p|PACid:30205475	8007	46652	435	435	25	25	56.2	5.31	424721	1	1	0	804.8	2411.38	3	2411.38	-0.0039	0	43.97	15	30	7.5e-05	R	VAPEEHPVLLTEAPLNPK	A
3	Pavir.Ca00213.1.p|PACid:30205475	Pavir.Ca00213.1.p|PACid:30205475	8007	46652	435	435	25	25	56.2	5.31	424722	1	1	0	603.852	2411.38	4	2411.38	-0.0039	0	25.6	20	30	0.016	R	VAPEEHPVLLTEAPLNPK	A
3	Pavir.Ca00213.1.p|PACid:30205475	Pavir.Ca00213.1.p|PACid:30205475	8007	46652	435	435	25	25	56.2	5.31	424724	1	1	0	804.8	2411.38	3	2411.38	-0.0037	0	65.4	17	30	7.4e-07	R	VAPEEHPVLLTEAPLNPK	A
3	Pavir.Ca00213.1.p|PACid:30205475	Pavir.Ca00213.1.p|PACid:30205475	8007	46652	435	435	25	25	56.2	5.31	424725	1	1	0	804.8	2411.38	3	2411.38	-0.0037	0	69.28	17	30	3.2e-07	R	VAPEEHPVLLTEAPLNPK	A
3	Pavir.Ca00213.1.p|PACid:30205475	Pavir.Ca00213.1.p|PACid:30205475	8007	46652	435	435	25	25	56.2	5.31	424728	1	1	0	603.852	2411.38	4	2411.38	-0.0036	0	34.33	21	30	0.0027	R	VAPEEHPVLLTEAPLNPK	A
3	Pavir.Ca00213.1.p|PACid:30205475	Pavir.Ca00213.1.p|PACid:30205475	8007	46652	435	435	25	25	56.2	5.31	424730	1	1	0	603.852	2411.38	4	2411.38	-0.0036	0	42.3	22	30	0.00053	R	VAPEEHPVLLTEAPLNPK	A
3	Pavir.Ca00213.1.p|PACid:30205475	Pavir.Ca00213.1.p|PACid:30205475	8007	46652	435	435	25	25	56.2	5.31	424731	1	1	0	603.852	2411.38	4	2411.38	-0.0036	0	29.13	19	30	0.0051	R	VAPEEHPVLLTEAPLNPK	A
3	Pavir.Ca00213.1.p|PACid:30205475	Pavir.Ca00213.1.p|PACid:30205475	8007	46652	435	435	25	25	56.2	5.31	424733	1	1	0	804.8	2411.38	3	2411.38	-0.0036	0	22.89	14	30	0.0071	R	VAPEEHPVLLTEAPLNPK	A
3	Pavir.Ca00213.1.p|PACid:30205475	Pavir.Ca00213.1.p|PACid:30205475	8007	46652	435	435	25	25	56.2	5.31	424734	1	1	0	804.8	2411.38	3	2411.38	-0.0036	0	30.03	16	30	0.0021	R	VAPEEHPVLLTEAPLNPK	A
3	Pavir.Ca00213.1.p|PACid:30205475	Pavir.Ca00213.1.p|PACid:30205475	8007	46652	435	435	25	25	56.2	5.31	424735	1	1	0	804.8	2411.38	3	2411.38	-0.0036	0	44.96	18	30	0.00013	R	VAPEEHPVLLTEAPLNPK	A
3	Pavir.Ca00213.1.p|PACid:30205475	Pavir.Ca00213.1.p|PACid:30205475	8007	46652	435	435	25	25	56.2	5.31	424737	1	1	0	603.852	2411.38	4	2411.38	-0.0034	0	28.65	18	30	0.0048	R	VAPEEHPVLLTEAPLNPK	A
3	Pavir.Ca00213.1.p|PACid:30205475	Pavir.Ca00213.1.p|PACid:30205475	8007	46652	435	435	25	25	56.2	5.31	424739	1	1	0	603.852	2411.38	4	2411.38	-0.0034	0	30.3	19	30	0.0044	R	VAPEEHPVLLTEAPLNPK	A
3	Pavir.Ca00213.1.p|PACid:30205475	Pavir.Ca00213.1.p|PACid:30205475	8007	46652	435	435	25	25	56.2	5.31	424740	1	1	0	804.801	2411.38	3	2411.38	-0.0034	0	41.03	16	30	0.00017	R	VAPEEHPVLLTEAPLNPK	A
3	Pavir.Ca00213.1.p|PACid:30205475	Pavir.Ca00213.1.p|PACid:30205475	8007	46652	435	435	25	25	56.2	5.31	424742	1	1	0	804.801	2411.38	3	2411.38	-0.0032	0	21.28	14	30	0.01	R	VAPEEHPVLLTEAPLNPK	A
3	Pavir.Ca00213.1.p|PACid:30205475	Pavir.Ca00213.1.p|PACid:30205475	8007	46652	435	435	25	25	56.2	5.31	424743	1	1	0	804.801	2411.38	3	2411.38	-0.0032	0	51.46	16	30	1.5e-05	R	VAPEEHPVLLTEAPLNPK	A
3	Pavir.Ca00213.1.p|PACid:30205475	Pavir.Ca00213.1.p|PACid:30205475	8007	46652	435	435	25	25	56.2	5.31	424744	1	1	0	804.801	2411.38	3	2411.38	-0.0032	0	18.05	17	30	0.045	R	VAPEEHPVLLTEAPLNPK	A
3	Pavir.Ca00213.1.p|PACid:30205475	Pavir.Ca00213.1.p|PACid:30205475	8007	46652	435	435	25	25	56.2	5.31	424745	1	1	0	603.852	2411.38	4	2411.38	-0.0031	0	18.06	15	30	0.027	R	VAPEEHPVLLTEAPLNPK	A
3	Pavir.Ca00213.1.p|PACid:30205475	Pavir.Ca00213.1.p|PACid:30205475	8007	46652	435	435	25	25	56.2	5.31	424747	1	1	0	603.852	2411.38	4	2411.38	-0.0031	0	16.51	14	30	0.028	R	VAPEEHPVLLTEAPLNPK	A
3	Pavir.Ca00213.1.p|PACid:30205475	Pavir.Ca00213.1.p|PACid:30205475	8007	46652	435	435	25	25	56.2	5.31	424750	1	1	0	603.852	2411.38	4	2411.38	-0.0031	0	23.95	15	30	0.0071	R	VAPEEHPVLLTEAPLNPK	A
3	Pavir.Ca00213.1.p|PACid:30205475	Pavir.Ca00213.1.p|PACid:30205475	8007	46652	435	435	25	25	56.2	5.31	424754	1	1	0	804.801	2411.38	3	2411.38	-0.0028	0	31.19	14	30	0.0012	R	VAPEEHPVLLTEAPLNPK	A
3	Pavir.Ca00213.1.p|PACid:30205475	Pavir.Ca00213.1.p|PACid:30205475	8007	46652	435	435	25	25	56.2	5.31	424755	1	1	0	804.801	2411.38	3	2411.38	-0.0028	0	47.55	15	30	3.5e-05	R	VAPEEHPVLLTEAPLNPK	A
3	Pavir.Ca00213.1.p|PACid:30205475	Pavir.Ca00213.1.p|PACid:30205475	8007	46652	435	435	25	25	56.2	5.31	424756	1	1	0	804.801	2411.38	3	2411.38	-0.0028	0	59.81	16	30	2.5e-06	R	VAPEEHPVLLTEAPLNPK	A
3	Pavir.Ca00213.1.p|PACid:30205475	Pavir.Ca00213.1.p|PACid:30205475	8007	46652	435	435	25	25	56.2	5.31	424757	1	1	0	804.801	2411.38	3	2411.38	-0.0026	0	55.96	16	30	5.7e-06	R	VAPEEHPVLLTEAPLNPK	A
3	Pavir.Ca00213.1.p|PACid:30205475	Pavir.Ca00213.1.p|PACid:30205475	8007	46652	435	435	25	25	56.2	5.31	424758	1	1	0	804.801	2411.38	3	2411.38	-0.0026	0	58.83	16	30	3e-06	R	VAPEEHPVLLTEAPLNPK	A
3	Pavir.Ca00213.1.p|PACid:30205475	Pavir.Ca00213.1.p|PACid:30205475	8007	46652	435	435	25	25	56.2	5.31	424760	1	1	0	603.852	2411.38	4	2411.38	-0.0026	0	17.86	16	30	0.039	R	VAPEEHPVLLTEAPLNPK	A
3	Pavir.Ca00213.1.p|PACid:30205475	Pavir.Ca00213.1.p|PACid:30205475	8007	46652	435	435	25	25	56.2	5.31	424761	1	1	0	603.852	2411.38	4	2411.38	-0.0026	0	29.72	20	30	0.0055	R	VAPEEHPVLLTEAPLNPK	A
3	Pavir.Ca00213.1.p|PACid:30205475	Pavir.Ca00213.1.p|PACid:30205475	8007	46652	435	435	25	25	56.2	5.31	424763	1	1	0	804.801	2411.38	3	2411.38	-0.0025	0	24.73	17	30	0.0091	R	VAPEEHPVLLTEAPLNPK	A
3	Pavir.Ca00213.1.p|PACid:30205475	Pavir.Ca00213.1.p|PACid:30205475	8007	46652	435	435	25	25	56.2	5.31	424764	1	1	0	804.801	2411.38	3	2411.38	-0.0025	0	34.85	17	30	0.00087	R	VAPEEHPVLLTEAPLNPK	A
3	Pavir.Ca00213.1.p|PACid:30205475	Pavir.Ca00213.1.p|PACid:30205475	8007	46652	435	435	25	25	56.2	5.31	424766	1	1	0	804.801	2411.38	3	2411.38	-0.0023	0	43.58	19	30	0.0002	R	VAPEEHPVLLTEAPLNPK	A
3	Pavir.Ca00213.1.p|PACid:30205475	Pavir.Ca00213.1.p|PACid:30205475	8007	46652	435	435	25	25	56.2	5.31	424767	1	1	0	603.852	2411.38	4	2411.38	-0.0021	0	28.12	18	30	0.0057	R	VAPEEHPVLLTEAPLNPK	A
3	Pavir.Ca00213.1.p|PACid:30205475	Pavir.Ca00213.1.p|PACid:30205475	8007	46652	435	435	25	25	56.2	5.31	424770	1	1	0	804.801	2411.38	3	2411.38	-0.0019	0	23.76	21	30	0.028	R	VAPEEHPVLLTEAPLNPK	A
3	Pavir.Ca00213.1.p|PACid:30205475	Pavir.Ca00213.1.p|PACid:30205475	8007	46652	435	435	25	25	56.2	5.31	424772	1	1	0	804.801	2411.38	3	2411.38	-0.0019	0	34	15	30	0.00065	R	VAPEEHPVLLTEAPLNPK	A
3	Pavir.Ca00213.1.p|PACid:30205475	Pavir.Ca00213.1.p|PACid:30205475	8007	46652	435	435	25	25	56.2	5.31	424773	1	1	0	804.801	2411.38	3	2411.38	-0.0019	0	69.54	17	30	3e-07	R	VAPEEHPVLLTEAPLNPK	A
3	Pavir.Ca00213.1.p|PACid:30205475	Pavir.Ca00213.1.p|PACid:30205475	8007	46652	435	435	25	25	56.2	5.31	424774	1	1	0	804.801	2411.38	3	2411.38	-0.0017	0	25.42	15	30	0.0046	R	VAPEEHPVLLTEAPLNPK	A
3	Pavir.Ca00213.1.p|PACid:30205475	Pavir.Ca00213.1.p|PACid:30205475	8007	46652	435	435	25	25	56.2	5.31	424775	1	1	0	804.801	2411.38	3	2411.38	-0.0017	0	35.59	15	30	0.00047	R	VAPEEHPVLLTEAPLNPK	A
3	Pavir.Ca00213.1.p|PACid:30205475	Pavir.Ca00213.1.p|PACid:30205475	8007	46652	435	435	25	25	56.2	5.31	424779	1	1	0	1206.7	2411.38	2	2411.38	-0.0013	0	40.99	15	30	0.00015	R	VAPEEHPVLLTEAPLNPK	A
3	Pavir.Ca00213.1.p|PACid:30205475	Pavir.Ca00213.1.p|PACid:30205475	8007	46652	435	435	25	25	56.2	5.31	424781	1	1	0	603.853	2411.38	4	2411.38	-0.0012	0	29.76	23	30	0.012	R	VAPEEHPVLLTEAPLNPK	A
3	Pavir.Ca00213.1.p|PACid:30205475	Pavir.Ca00213.1.p|PACid:30205475	8007	46652	435	435	25	25	56.2	5.31	424784	1	1	0	603.853	2411.38	4	2411.38	-0.0007	0	24.65	19	30	0.014	R	VAPEEHPVLLTEAPLNPK	A
3	Pavir.Ca00213.1.p|PACid:30205475	Pavir.Ca00213.1.p|PACid:30205475	8007	46652	435	435	25	25	56.2	5.31	424786	1	1	0	603.853	2411.38	4	2411.38	-0.0005	0	31.63	19	30	0.0029	R	VAPEEHPVLLTEAPLNPK	A
3	Pavir.Ca00213.1.p|PACid:30205475	Pavir.Ca00213.1.p|PACid:30205475	8007	46652	435	435	25	25	56.2	5.31	424787	1	1	0	804.802	2411.38	3	2411.38	-0.0003	0	19.38	15	30	0.018	R	VAPEEHPVLLTEAPLNPK	A
3	Pavir.Ca00213.1.p|PACid:30205475	Pavir.Ca00213.1.p|PACid:30205475	8007	46652	435	435	25	25	56.2	5.31	424789	1	1	0	603.853	2411.38	4	2411.38	0.001	0	34.85	19	30	0.0014	R	VAPEEHPVLLTEAPLNPK	A
3	Pavir.Ca00213.1.p|PACid:30205475	Pavir.Ca00213.1.p|PACid:30205475	8007	46652	435	435	25	25	56.2	5.31	424791	1	1	0	804.802	2411.39	3	2411.38	0.0023	0	56.3	17	30	6.5e-06	R	VAPEEHPVLLTEAPLNPK	A
3	Pavir.Ca00213.1.p|PACid:30205475	Pavir.Ca00213.1.p|PACid:30205475	8007	46652	435	435	25	25	56.2	5.31	424886	1	1	0	805.128	2412.36	3	2412.37	-0.0054	0	47.37	18	31	6.2e-05	R	VAPEEHPVLLTEAPLNPK	A	Deamidated (NQ)	0.000000000000000200.0
3	Pavir.Ca00213.1.p|PACid:30205475	Pavir.Ca00213.1.p|PACid:30205475	8007	46652	435	435	25	25	56.2	5.31	424887	1	1	0	805.129	2412.37	3	2412.37	-0.0014	0	33.11	15	31	0.00079	R	VAPEEHPVLLTEAPLNPK	A	Deamidated (NQ)	0.000000000000000200.0
3	Pavir.Ca00213.1.p|PACid:30205475	Pavir.Ca00213.1.p|PACid:30205475	8007	46652	435	435	25	25	56.2	5.31	424899	1	1	0	1207.2	2412.38	2	2412.37	0.0137	0	37.44	15	30	0.00031	R	VAPEEHPVLLTEAPLNPK	A	Deamidated (NQ)	0.000000000000000200.0
3	Pavir.Ca00213.1.p|PACid:30205475	Pavir.Ca00213.1.p|PACid:30205475	8007	46652	435	435	25	25	56.2	5.31	424901	1	1	0	805.134	2412.38	3	2412.37	0.0139	0	17.4	14	30	0.023	R	VAPEEHPVLLTEAPLNPK	A	Deamidated (NQ)	0.000000000000000200.0
3	Pavir.Ca00213.1.p|PACid:30205475	Pavir.Ca00213.1.p|PACid:30205475	8007	46652	435	435	25	25	56.2	5.31	424914	1	1	0	604.103	2412.38	4	2412.37	0.0158	0	18.42	14	30	0.019	R	VAPEEHPVLLTEAPLNPK	A	Deamidated (NQ)	0.000000000000000200.0
3	Pavir.Ca00213.1.p|PACid:30205475	Pavir.Ca00213.1.p|PACid:30205475	8007	46652	435	435	25	25	56.2	5.31	424919	1	1	0	805.135	2412.38	3	2412.37	0.0164	0	40.81	15	30	0.00015	R	VAPEEHPVLLTEAPLNPK	A	Deamidated (NQ)	0.000000000000000200.0
3	Pavir.Ca00213.1.p|PACid:30205475	Pavir.Ca00213.1.p|PACid:30205475	8007	46652	435	435	25	25	56.2	5.31	424920	1	1	0	805.135	2412.38	3	2412.37	0.0171	0	14.91	13	30	0.04	R	VAPEEHPVLLTEAPLNPK	A	Deamidated (NQ)	0.000000000000000200.0
3	Pavir.Ca00213.1.p|PACid:30205475	Pavir.Ca00213.1.p|PACid:30205475	8007	46652	435	435	25	25	56.2	5.31	477680	1	1	0	689.147	2752.56	4	2752.56	-0.0051	1	40.85	15	29	0.00015	R	VAPEEHPVLLTEAPLNPKANR	E
3	Pavir.Ca00213.1.p|PACid:30205475	Pavir.Ca00213.1.p|PACid:30205475	8007	46652	435	435	25	25	56.2	5.31	477681	1	1	0	689.147	2752.56	4	2752.56	-0.0046	1	32.67	15	29	0.00086	R	VAPEEHPVLLTEAPLNPKANR	E
3	Pavir.Ca00213.1.p|PACid:30205475	Pavir.Ca00213.1.p|PACid:30205475	8007	46652	435	435	25	25	56.2	5.31	477682	1	1	0	689.148	2752.56	4	2752.56	-0.0031	1	35.46	15	29	0.00047	R	VAPEEHPVLLTEAPLNPKANR	E
3	Pavir.Ca00213.1.p|PACid:30205475	Pavir.Ca00213.1.p|PACid:30205475	8007	46652	435	435	25	25	56.2	5.31	477683	1	1	0	689.148	2752.56	4	2752.56	-0.0024	1	22.99	14	29	0.007	R	VAPEEHPVLLTEAPLNPKANR	E
3	Pavir.Ca00213.1.p|PACid:30205475	Pavir.Ca00213.1.p|PACid:30205475	8007	46652	435	435	25	25	56.2	5.31	477684	1	1	0	689.148	2752.56	4	2752.56	-0.0016	1	33.71	15	29	0.00076	R	VAPEEHPVLLTEAPLNPKANR	E
3	Pavir.Ca00213.1.p|PACid:30205475	Pavir.Ca00213.1.p|PACid:30205475	8007	46652	435	435	25	25	56.2	5.31	482317	1	1	0	929.169	2784.48	3	2784.49	-0.0045	1	31.67	14	32	0.0011	R	KDLYGNIVLSGGSTMFPGIADR	M	Oxidation (M)	0.0000000000000010000000.0
3	Pavir.Ca00213.1.p|PACid:30205475	Pavir.Ca00213.1.p|PACid:30205475	8007	46652	435	435	25	25	56.2	5.31	482318	1	1	0	929.169	2784.48	3	2784.49	-0.0045	1	68.06	22	32	1.3e-06	R	KDLYGNIVLSGGSTMFPGIADR	M	Oxidation (M)	0.0000000000000010000000.0
3	Pavir.Ca00213.1.p|PACid:30205475	Pavir.Ca00213.1.p|PACid:30205475	8007	46652	435	435	25	25	56.2	5.31	482320	1	1	0	697.129	2784.49	4	2784.49	-0.0011	1	52.26	16	32	1.3e-05	R	KDLYGNIVLSGGSTMFPGIADR	M	Oxidation (M)	0.0000000000000010000000.0
3	Pavir.Ca00213.1.p|PACid:30205475	Pavir.Ca00213.1.p|PACid:30205475	8007	46652	435	435	25	25	56.2	5.31	482488	1	1	0	929.503	2785.49	3	2785.47	0.0151	1	28.43	14	32	0.0022	R	KDLYGNIVLSGGSTMFPGIADR	M	Oxidation (M); Deamidated (NQ)	0.0000020000000010000000.0
3	Pavir.Ca00213.1.p|PACid:30205475	Pavir.Ca00213.1.p|PACid:30205475	8007	46652	435	435	25	25	56.2	5.31	506918	1	1	0	753.643	3010.54	4	3010.55	-0.0044	1	52.75	18	31	1.9e-05	R	HTGVMVGMGQKDAYVGDEAQSK	R	Oxidation (M)	0.0000100000000000000000.0
3	Pavir.Ca00213.1.p|PACid:30205475	Pavir.Ca00213.1.p|PACid:30205475	8007	46652	435	435	25	25	56.2	5.31	506919	1	1	0	753.643	3010.54	4	3010.55	-0.0039	1	53.57	21	31	2.9e-05	R	HTGVMVGMGQKDAYVGDEAQSK	R	Oxidation (M)	0.0000000100000000000000.0
3	Pavir.Ca00213.1.p|PACid:30205475	Pavir.Ca00213.1.p|PACid:30205475	8007	46652	435	435	25	25	56.2	5.31	506976	1	1	0	753.893	3011.54	4	3011.53	0.0118	1	17.77	14	31	0.022	R	HTGVMVGMGQKDAYVGDEAQSK	R	Oxidation (M); Deamidated (NQ)	0.0000000102000000000000.0
3	Pavir.Ca00213.1.p|PACid:30205475	Pavir.Ca00213.1.p|PACid:30205475	8007	46652	435	435	25	25	56.2	5.31	506978	1	1	0	753.893	3011.54	4	3011.53	0.0145	1	53.5	16	31	1e-05	R	HTGVMVGMGQKDAYVGDEAQSK	R	Oxidation (M); Deamidated (NQ)	0.0000100002000000000000.0
3	Pavir.Ca00213.1.p|PACid:30205475	Pavir.Ca00213.1.p|PACid:30205475	8007	46652	435	435	25	25	56.2	5.31	508109	1	1	0	757.64	3026.53	4	3026.54	-0.0086	1	21.97	17	31	0.016	R	HTGVMVGMGQKDAYVGDEAQSK	R	2 Oxidation (M)	0.0000100100000000000000.0
3	Pavir.Ca00213.1.p|PACid:30205475	Pavir.Ca00213.1.p|PACid:30205475	8007	46652	435	435	25	25	56.2	5.31	508182	1	1	0	757.892	3027.54	4	3027.53	0.013	1	41.29	15	31	0.00013	R	HTGVMVGMGQKDAYVGDEAQSK	R	2 Oxidation (M); Deamidated (NQ)	0.0000100102000000000000.0			Quantitation summary for protein	126/127C	1.105	342	N/A		N/A	127n/127C	1.114	371	N/A		N/A	128c/127C	1.087	362	N/A
4	Pavir.Ia02104.1.p|PACid:30213356	Pavir.Ia02104.1.p|PACid:30213356	7906	46496	432	432	24	24	54.4	5.24	6138	1	0	0	437.271	872.527	2	872.528	-0.0016	0	33.5		31	0.029	R	LDLAGR	D
4	Pavir.Ia02104.1.p|PACid:30213356	Pavir.Ia02104.1.p|PACid:30213356	7906	46496	432	432	24	24	54.4	5.24	19975	1	0	0	498.245	994.476	2	994.478	-0.0017	0	36.11		23	0.0025	K	CDVDIR	K
4	Pavir.Ia02104.1.p|PACid:30213356	Pavir.Ia02104.1.p|PACid:30213356	7906	46496	432	432	24	24	54.4	5.24	20175	1	0	0	498.805	995.596	2	995.597	-0.001	0	32.44		22	0.0046	K	VVAPPER	K
4	Pavir.Ia02104.1.p|PACid:30213356	Pavir.Ia02104.1.p|PACid:30213356	7906	46496	432	432	24	24	54.4	5.24	20178	1	0	0	498.805	995.596	2	995.597	-0.0003	0	22.49		22	0.046	K	VVAPPER	K
4	Pavir.Ia02104.1.p|PACid:30213356	Pavir.Ia02104.1.p|PACid:30213356	7906	46496	432	432	24	24	54.4	5.24	54539	1	0	0	603.308	1204.6	2	1204.6	-0.0031	0	51.51		25	0.00013	K	AGFAGDDAPR	A
4	Pavir.Ia02104.1.p|PACid:30213356	Pavir.Ia02104.1.p|PACid:30213356	7906	46496	432	432	24	24	54.4	5.24	54544	1	0	0	603.308	1204.6	2	1204.6	-0.0025	0	29.95		25	0.018	K	AGFAGDDAPR	A
4	Pavir.Ia02104.1.p|PACid:30213356	Pavir.Ia02104.1.p|PACid:30213356	7906	46496	432	432	24	24	54.4	5.24	54545	1	0	0	603.308	1204.6	2	1204.6	-0.0024	0	31.13		25	0.014	K	AGFAGDDAPR	A
4	Pavir.Ia02104.1.p|PACid:30213356	Pavir.Ia02104.1.p|PACid:30213356	7906	46496	432	432	24	24	54.4	5.24	54548	1	0	0	603.308	1204.6	2	1204.6	-0.0023	0	71.47		25	1.2e-06	K	AGFAGDDAPR	A
4	Pavir.Ia02104.1.p|PACid:30213356	Pavir.Ia02104.1.p|PACid:30213356	7906	46496	432	432	24	24	54.4	5.24	54549	1	0	0	603.308	1204.6	2	1204.6	-0.0023	0	33.6	16	25	0.00098	K	AGFAGDDAPR	A
4	Pavir.Ia02104.1.p|PACid:30213356	Pavir.Ia02104.1.p|PACid:30213356	7906	46496	432	432	24	24	54.4	5.24	54551	1	0	0	603.308	1204.6	2	1204.6	-0.0022	0	34.16		26	0.0078	K	AGFAGDDAPR	A
4	Pavir.Ia02104.1.p|PACid:30213356	Pavir.Ia02104.1.p|PACid:30213356	7906	46496	432	432	24	24	54.4	5.24	54552	1	0	0	603.308	1204.6	2	1204.6	-0.0022	0	43.82		26	0.00084	K	AGFAGDDAPR	A
4	Pavir.Ia02104.1.p|PACid:30213356	Pavir.Ia02104.1.p|PACid:30213356	7906	46496	432	432	24	24	54.4	5.24	54555	1	0	0	603.308	1204.6	2	1204.6	-0.002	0	35.13	25	26	0.006	K	AGFAGDDAPR	A
4	Pavir.Ia02104.1.p|PACid:30213356	Pavir.Ia02104.1.p|PACid:30213356	7906	46496	432	432	24	24	54.4	5.24	54559	1	0	0	603.308	1204.6	2	1204.6	-0.0019	0	17.57	14	26	0.025	K	AGFAGDDAPR	A
4	Pavir.Ia02104.1.p|PACid:30213356	Pavir.Ia02104.1.p|PACid:30213356	7906	46496	432	432	24	24	54.4	5.24	54560	1	0	0	603.308	1204.6	2	1204.6	-0.0019	0	56.77		26	4.3e-05	K	AGFAGDDAPR	A
4	Pavir.Ia02104.1.p|PACid:30213356	Pavir.Ia02104.1.p|PACid:30213356	7906	46496	432	432	24	24	54.4	5.24	54561	1	0	0	603.308	1204.6	2	1204.6	-0.0018	0	47.66		26	0.00035	K	AGFAGDDAPR	A
4	Pavir.Ia02104.1.p|PACid:30213356	Pavir.Ia02104.1.p|PACid:30213356	7906	46496	432	432	24	24	54.4	5.24	54565	1	0	0	603.308	1204.6	2	1204.6	-0.0016	0	59.96		26	2e-05	K	AGFAGDDAPR	A
4	Pavir.Ia02104.1.p|PACid:30213356	Pavir.Ia02104.1.p|PACid:30213356	7906	46496	432	432	24	24	54.4	5.24	54568	1	0	0	603.309	1204.6	2	1204.6	-0.0013	0	18.18	17	26	0.039	K	AGFAGDDAPR	A
4	Pavir.Ia02104.1.p|PACid:30213356	Pavir.Ia02104.1.p|PACid:30213356	7906	46496	432	432	24	24	54.4	5.24	54569	1	0	0	402.542	1204.6	3	1204.6	-0.0008	0	29.63	14	26	0.0017	K	AGFAGDDAPR	A
4	Pavir.Ia02104.1.p|PACid:30213356	Pavir.Ia02104.1.p|PACid:30213356	7906	46496	432	432	24	24	54.4	5.24	54570	1	0	0	603.309	1204.6	2	1204.6	-0.0007	0	36.56		26	0.005	K	AGFAGDDAPR	A
4	Pavir.Ia02104.1.p|PACid:30213356	Pavir.Ia02104.1.p|PACid:30213356	7906	46496	432	432	24	24	54.4	5.24	54573	1	0	0	603.309	1204.6	2	1204.6	-0.0005	0	30.06	22	26	0.0086	K	AGFAGDDAPR	A
4	Pavir.Ia02104.1.p|PACid:30213356	Pavir.Ia02104.1.p|PACid:30213356	7906	46496	432	432	24	24	54.4	5.24	97988	1	0	0	676.874	1351.73	2	1351.74	-0.0028	1	22.19	14	30	0.0093	K	CDVDIRK	D
4	Pavir.Ia02104.1.p|PACid:30213356	Pavir.Ia02104.1.p|PACid:30213356	7906	46496	432	432	24	24	54.4	5.24	97996	1	0	0	676.874	1351.73	2	1351.74	-0.0025	1	15.99	14	30	0.037	K	CDVDIRK	D
4	Pavir.Ia02104.1.p|PACid:30213356	Pavir.Ia02104.1.p|PACid:30213356	7906	46496	432	432	24	24	54.4	5.24	98004	1	0	0	451.585	1351.73	3	1351.74	-0.002	1	19.17	16	30	0.029	K	CDVDIRK	D
4	Pavir.Ia02104.1.p|PACid:30213356	Pavir.Ia02104.1.p|PACid:30213356	7906	46496	432	432	24	24	54.4	5.24	98009	1	0	0	451.585	1351.73	3	1351.74	-0.0018	1	20.93	17	30	0.022	K	CDVDIRK	D
4	Pavir.Ia02104.1.p|PACid:30213356	Pavir.Ia02104.1.p|PACid:30213356	7906	46496	432	432	24	24	54.4	5.24	98379	1	0	0	677.433	1352.85	2	1352.85	-0.0031	1	34.56	16	27	0.0008	K	VVAPPERK	Y
4	Pavir.Ia02104.1.p|PACid:30213356	Pavir.Ia02104.1.p|PACid:30213356	7906	46496	432	432	24	24	54.4	5.24	98383	1	0	0	451.958	1352.85	3	1352.85	-0.0027	1	17.45	14	27	0.023	K	VVAPPERK	Y
4	Pavir.Ia02104.1.p|PACid:30213356	Pavir.Ia02104.1.p|PACid:30213356	7906	46496	432	432	24	24	54.4	5.24	98385	1	0	0	451.958	1352.85	3	1352.85	-0.0027	1	14.83	13	27	0.041	K	VVAPPERK	Y
4	Pavir.Ia02104.1.p|PACid:30213356	Pavir.Ia02104.1.p|PACid:30213356	7906	46496	432	432	24	24	54.4	5.24	98397	1	0	0	677.433	1352.85	2	1352.85	-0.0025	1	32.66	16	27	0.0012	K	VVAPPERK	Y
4	Pavir.Ia02104.1.p|PACid:30213356	Pavir.Ia02104.1.p|PACid:30213356	7906	46496	432	432	24	24	54.4	5.24	98412	1	0	0	451.958	1352.85	3	1352.85	-0.0022	1	16.94	14	27	0.026	K	VVAPPERK	Y
4	Pavir.Ia02104.1.p|PACid:30213356	Pavir.Ia02104.1.p|PACid:30213356	7906	46496	432	432	24	24	54.4	5.24	98425	1	0	0	677.434	1352.85	2	1352.85	-0.0017	1	30.16	14	27	0.0015	K	VVAPPERK	Y
4	Pavir.Ia02104.1.p|PACid:30213356	Pavir.Ia02104.1.p|PACid:30213356	7906	46496	432	432	24	24	54.4	5.24	101139	1	0	0	681.347	1360.68	2	1360.68	-0.003	0	34.31	16	27	0.00087	R	GYSFTTTAER	E
4	Pavir.Ia02104.1.p|PACid:30213356	Pavir.Ia02104.1.p|PACid:30213356	7906	46496	432	432	24	24	54.4	5.24	101140	1	0	0	681.347	1360.68	2	1360.68	-0.0026	0	53.98	21	27	2.6e-05	R	GYSFTTTAER	E
4	Pavir.Ia02104.1.p|PACid:30213356	Pavir.Ia02104.1.p|PACid:30213356	7906	46496	432	432	24	24	54.4	5.24	107168	1	0	0	690.893	1379.77	2	1379.77	-0.0014	0	43.51	28	30	0.0015	R	DLTDSLMK	I
4	Pavir.Ia02104.1.p|PACid:30213356	Pavir.Ia02104.1.p|PACid:30213356	7906	46496	432	432	24	24	54.4	5.24	112025	1	0	0	698.89	1395.77	2	1395.77	-0.0028	0	31.22	18	29	0.003	R	DLTDSLMK	I	Oxidation (M)	0.00000010.0
4	Pavir.Ia02104.1.p|PACid:30213356	Pavir.Ia02104.1.p|PACid:30213356	7906	46496	432	432	24	24	54.4	5.24	112028	1	0	0	698.89	1395.77	2	1395.77	-0.0022	0	27.41	17	29	0.0052	R	DLTDSLMK	I	Oxidation (M)	0.00000010.0
4	Pavir.Ia02104.1.p|PACid:30213356	Pavir.Ia02104.1.p|PACid:30213356	7906	46496	432	432	24	24	54.4	5.24	112029	1	0	0	698.891	1395.77	2	1395.77	-0.0008	0	22.6	14	29	0.0076	R	DLTDSLMK	I	Oxidation (M)	0.00000010.0
4	Pavir.Ia02104.1.p|PACid:30213356	Pavir.Ia02104.1.p|PACid:30213356	7906	46496	432	432	24	24	54.4	5.24	122517	1	0	0	476.626	1426.86	3	1426.86	-0.0044	0	16.1	14	28	0.031	R	AVFPSIVGRPR	H
4	Pavir.Ia02104.1.p|PACid:30213356	Pavir.Ia02104.1.p|PACid:30213356	7906	46496	432	432	24	24	54.4	5.24	122519	1	0	0	476.627	1426.86	3	1426.86	-0.0033	0	26.3	14	28	0.0034	R	AVFPSIVGRPR	H
4	Pavir.Ia02104.1.p|PACid:30213356	Pavir.Ia02104.1.p|PACid:30213356	7906	46496	432	432	24	24	54.4	5.24	122520	1	0	0	476.627	1426.86	3	1426.86	-0.0031	0	34.83	16	28	0.00078	R	AVFPSIVGRPR	H
4	Pavir.Ia02104.1.p|PACid:30213356	Pavir.Ia02104.1.p|PACid:30213356	7906	46496	432	432	24	24	54.4	5.24	122521	1	0	0	476.627	1426.86	3	1426.86	-0.0029	0	29.18	15	28	0.0021	R	AVFPSIVGRPR	H
4	Pavir.Ia02104.1.p|PACid:30213356	Pavir.Ia02104.1.p|PACid:30213356	7906	46496	432	432	24	24	54.4	5.24	122523	1	0	0	476.627	1426.86	3	1426.86	-0.0027	0	14.69	13	28	0.042	R	AVFPSIVGRPR	H
4	Pavir.Ia02104.1.p|PACid:30213356	Pavir.Ia02104.1.p|PACid:30213356	7906	46496	432	432	24	24	54.4	5.24	122524	1	0	0	476.627	1426.86	3	1426.86	-0.0025	0	27.01	24	28	0.031	R	AVFPSIVGRPR	H
4	Pavir.Ia02104.1.p|PACid:30213356	Pavir.Ia02104.1.p|PACid:30213356	7906	46496	432	432	24	24	54.4	5.24	122525	1	0	0	476.627	1426.86	3	1426.86	-0.0025	0	42.68	25	28	0.00093	R	AVFPSIVGRPR	H
4	Pavir.Ia02104.1.p|PACid:30213356	Pavir.Ia02104.1.p|PACid:30213356	7906	46496	432	432	24	24	54.4	5.24	122526	1	0	0	476.627	1426.86	3	1426.86	-0.0024	0	35.06	25	28	0.0051	R	AVFPSIVGRPR	H
4	Pavir.Ia02104.1.p|PACid:30213356	Pavir.Ia02104.1.p|PACid:30213356	7906	46496	432	432	24	24	54.4	5.24	122528	1	0	0	476.627	1426.86	3	1426.86	-0.0022	0	31.5	18	28	0.0025	R	AVFPSIVGRPR	H
4	Pavir.Ia02104.1.p|PACid:30213356	Pavir.Ia02104.1.p|PACid:30213356	7906	46496	432	432	24	24	54.4	5.24	122529	1	0	0	476.627	1426.86	3	1426.86	-0.0021	0	28.17	25	28	0.025	R	AVFPSIVGRPR	H
4	Pavir.Ia02104.1.p|PACid:30213356	Pavir.Ia02104.1.p|PACid:30213356	7906	46496	432	432	24	24	54.4	5.24	122530	1	0	0	476.627	1426.86	3	1426.86	-0.002	0	30.2	24	28	0.013	R	AVFPSIVGRPR	H
4	Pavir.Ia02104.1.p|PACid:30213356	Pavir.Ia02104.1.p|PACid:30213356	7906	46496	432	432	24	24	54.4	5.24	122531	1	0	0	476.627	1426.86	3	1426.86	-0.002	0	34.03	26	28	0.0098	R	AVFPSIVGRPR	H
4	Pavir.Ia02104.1.p|PACid:30213356	Pavir.Ia02104.1.p|PACid:30213356	7906	46496	432	432	24	24	54.4	5.24	122532	1	0	0	476.627	1426.86	3	1426.86	-0.002	0	20.88	14	28	0.011	R	AVFPSIVGRPR	H
4	Pavir.Ia02104.1.p|PACid:30213356	Pavir.Ia02104.1.p|PACid:30213356	7906	46496	432	432	24	24	54.4	5.24	122533	1	0	0	476.627	1426.86	3	1426.86	-0.002	0	35.29	26	28	0.0069	R	AVFPSIVGRPR	H
4	Pavir.Ia02104.1.p|PACid:30213356	Pavir.Ia02104.1.p|PACid:30213356	7906	46496	432	432	24	24	54.4	5.24	122534	1	0	0	476.627	1426.86	3	1426.86	-0.0018	0	32.16	15	28	0.0011	R	AVFPSIVGRPR	H
4	Pavir.Ia02104.1.p|PACid:30213356	Pavir.Ia02104.1.p|PACid:30213356	7906	46496	432	432	24	24	54.4	5.24	122535	1	0	0	476.627	1426.86	3	1426.86	-0.0017	0	25.04	14	28	0.0045	R	AVFPSIVGRPR	H
4	Pavir.Ia02104.1.p|PACid:30213356	Pavir.Ia02104.1.p|PACid:30213356	7906	46496	432	432	24	24	54.4	5.24	122536	1	0	0	476.627	1426.86	3	1426.86	-0.0017	0	28.33	17	28	0.0046	R	AVFPSIVGRPR	H
4	Pavir.Ia02104.1.p|PACid:30213356	Pavir.Ia02104.1.p|PACid:30213356	7906	46496	432	432	24	24	54.4	5.24	122538	1	0	0	476.627	1426.86	3	1426.86	-0.0013	0	21.52	14	28	0.0096	R	AVFPSIVGRPR	H
4	Pavir.Ia02104.1.p|PACid:30213356	Pavir.Ia02104.1.p|PACid:30213356	7906	46496	432	432	24	24	54.4	5.24	122539	1	0	0	476.627	1426.86	3	1426.86	-0.0012	0	31.14	14	28	0.0012	R	AVFPSIVGRPR	H
4	Pavir.Ia02104.1.p|PACid:30213356	Pavir.Ia02104.1.p|PACid:30213356	7906	46496	432	432	24	24	54.4	5.24	122540	1	0	0	476.628	1426.86	3	1426.86	0.0002	0	31.36	18	27	0.0024	R	AVFPSIVGRPR	H
4	Pavir.Ia02104.1.p|PACid:30213356	Pavir.Ia02104.1.p|PACid:30213356	7906	46496	432	432	24	24	54.4	5.24	122541	1	0	0	476.629	1426.86	3	1426.86	0.0034	0	33.19	17	27	0.0015	R	AVFPSIVGRPR	H
4	Pavir.Ia02104.1.p|PACid:30213356	Pavir.Ia02104.1.p|PACid:30213356	7906	46496	432	432	24	24	54.4	5.24	122542	1	0	0	476.629	1426.87	3	1426.86	0.0041	0	32.38	15	27	0.00092	R	AVFPSIVGRPR	H
4	Pavir.Ia02104.1.p|PACid:30213356	Pavir.Ia02104.1.p|PACid:30213356	7906	46496	432	432	24	24	54.4	5.24	183711	1	0	0	534.966	1601.87	3	1601.88	-0.0039	0	29.18	14	30	0.0018	R	HTGVMVGMGQK	D
4	Pavir.Ia02104.1.p|PACid:30213356	Pavir.Ia02104.1.p|PACid:30213356	7906	46496	432	432	24	24	54.4	5.24	183712	1	0	0	534.966	1601.88	3	1601.88	-0.0037	0	31.03	14	30	0.0012	R	HTGVMVGMGQK	D
4	Pavir.Ia02104.1.p|PACid:30213356	Pavir.Ia02104.1.p|PACid:30213356	7906	46496	432	432	24	24	54.4	5.24	183715	1	0	0	534.966	1601.88	3	1601.88	-0.0033	0	43.61	15	30	8.1e-05	R	HTGVMVGMGQK	D
4	Pavir.Ia02104.1.p|PACid:30213356	Pavir.Ia02104.1.p|PACid:30213356	7906	46496	432	432	24	24	54.4	5.24	183720	1	0	0	534.966	1601.88	3	1601.88	-0.0024	0	43.85	16	30	8.5e-05	R	HTGVMVGMGQK	D
4	Pavir.Ia02104.1.p|PACid:30213356	Pavir.Ia02104.1.p|PACid:30213356	7906	46496	432	432	24	24	54.4	5.24	183722	1	0	0	534.966	1601.88	3	1601.88	-0.0017	0	55.54	16	30	6.7e-06	R	HTGVMVGMGQK	D
4	Pavir.Ia02104.1.p|PACid:30213356	Pavir.Ia02104.1.p|PACid:30213356	7906	46496	432	432	24	24	54.4	5.24	183723	1	0	0	401.477	1601.88	4	1601.88	-0.0014	0	21.88	15	30	0.011	R	HTGVMVGMGQK	D
4	Pavir.Ia02104.1.p|PACid:30213356	Pavir.Ia02104.1.p|PACid:30213356	7906	46496	432	432	24	24	54.4	5.24	183724	1	0	0	534.966	1601.88	3	1601.88	-0.0013	0	28.03	14	30	0.0024	R	HTGVMVGMGQK	D
4	Pavir.Ia02104.1.p|PACid:30213356	Pavir.Ia02104.1.p|PACid:30213356	7906	46496	432	432	24	24	54.4	5.24	183726	1	0	0	801.946	1601.88	2	1601.88	-0.0006	0	78.21	17	30	4.7e-08	R	HTGVMVGMGQK	D
4	Pavir.Ia02104.1.p|PACid:30213356	Pavir.Ia02104.1.p|PACid:30213356	7906	46496	432	432	24	24	54.4	5.24	185017	1	0	0	803.466	1604.92	2	1604.92	-0.0029	0	49.09		31	0.00088	K	EITALAPSSMK	I
4	Pavir.Ia02104.1.p|PACid:30213356	Pavir.Ia02104.1.p|PACid:30213356	7906	46496	432	432	24	24	54.4	5.24	185018	1	0	0	803.466	1604.92	2	1604.92	-0.0027	0	68.25		31	1.1e-05	K	EITALAPSSMK	I
4	Pavir.Ia02104.1.p|PACid:30213356	Pavir.Ia02104.1.p|PACid:30213356	7906	46496	432	432	24	24	54.4	5.24	185021	1	0	0	535.98	1604.92	3	1604.92	-0.0025	0	30.4	15	31	0.0015	K	EITALAPSSMK	I
4	Pavir.Ia02104.1.p|PACid:30213356	Pavir.Ia02104.1.p|PACid:30213356	7906	46496	432	432	24	24	54.4	5.24	185024	1	0	0	535.98	1604.92	3	1604.92	-0.0019	0	50.45	18	31	3.2e-05	K	EITALAPSSMK	I
4	Pavir.Ia02104.1.p|PACid:30213356	Pavir.Ia02104.1.p|PACid:30213356	7906	46496	432	432	24	24	54.4	5.24	185027	1	0	0	535.981	1604.92	3	1604.92	-0.0015	0	54.15	18	31	1.4e-05	K	EITALAPSSMK	I
4	Pavir.Ia02104.1.p|PACid:30213356	Pavir.Ia02104.1.p|PACid:30213356	7906	46496	432	432	24	24	54.4	5.24	185029	1	0	0	803.467	1604.92	2	1604.92	-0.0008	0	62.18		31	4.1e-05	K	EITALAPSSMK	I
4	Pavir.Ia02104.1.p|PACid:30213356	Pavir.Ia02104.1.p|PACid:30213356	7906	46496	432	432	24	24	54.4	5.24	185038	1	0	0	803.468	1604.92	2	1604.92	0.0006	0	49.32		31	0.0008	K	EITALAPSSMK	I
4	Pavir.Ia02104.1.p|PACid:30213356	Pavir.Ia02104.1.p|PACid:30213356	7906	46496	432	432	24	24	54.4	5.24	189366	1	0	0	540.297	1617.87	3	1617.87	-0.0045	0	39.43	21	30	0.00086	R	HTGVMVGMGQK	D	Oxidation (M)	0.00000001000.0
4	Pavir.Ia02104.1.p|PACid:30213356	Pavir.Ia02104.1.p|PACid:30213356	7906	46496	432	432	24	24	54.4	5.24	189368	1	0	0	540.297	1617.87	3	1617.87	-0.0045	0	36.45	15	30	0.00038	R	HTGVMVGMGQK	D	Oxidation (M)	0.00001000000.0
4	Pavir.Ia02104.1.p|PACid:30213356	Pavir.Ia02104.1.p|PACid:30213356	7906	46496	432	432	24	24	54.4	5.24	189370	1	0	0	540.297	1617.87	3	1617.87	-0.004	0	13.92	13	30	0.049	R	HTGVMVGMGQK	D	Oxidation (M)	0.00001000000.0
4	Pavir.Ia02104.1.p|PACid:30213356	Pavir.Ia02104.1.p|PACid:30213356	7906	46496	432	432	24	24	54.4	5.24	189372	1	0	0	540.297	1617.87	3	1617.87	-0.0038	0	15.34	13	30	0.036	R	HTGVMVGMGQK	D	Oxidation (M)	0.00001000000.0
4	Pavir.Ia02104.1.p|PACid:30213356	Pavir.Ia02104.1.p|PACid:30213356	7906	46496	432	432	24	24	54.4	5.24	189373	1	0	0	540.297	1617.87	3	1617.87	-0.0036	0	15.59	13	30	0.034	R	HTGVMVGMGQK	D	Oxidation (M)	0.00001000000.0
4	Pavir.Ia02104.1.p|PACid:30213356	Pavir.Ia02104.1.p|PACid:30213356	7906	46496	432	432	24	24	54.4	5.24	189374	1	0	0	540.297	1617.87	3	1617.87	-0.0036	0	18.32	14	30	0.019	R	HTGVMVGMGQK	D	Oxidation (M)	0.00001000000.0
4	Pavir.Ia02104.1.p|PACid:30213356	Pavir.Ia02104.1.p|PACid:30213356	7906	46496	432	432	24	24	54.4	5.24	189375	1	0	0	540.297	1617.87	3	1617.87	-0.0036	0	17.28	14	30	0.024	R	HTGVMVGMGQK	D	Oxidation (M)	0.00001000000.0
4	Pavir.Ia02104.1.p|PACid:30213356	Pavir.Ia02104.1.p|PACid:30213356	7906	46496	432	432	24	24	54.4	5.24	189376	1	0	0	540.297	1617.87	3	1617.87	-0.0034	0	31.48	14	30	0.0011	R	HTGVMVGMGQK	D	Oxidation (M)	0.00000001000.0
4	Pavir.Ia02104.1.p|PACid:30213356	Pavir.Ia02104.1.p|PACid:30213356	7906	46496	432	432	24	24	54.4	5.24	189377	1	0	0	540.297	1617.87	3	1617.87	-0.0033	0	23.21	21	30	0.033	R	HTGVMVGMGQK	D	Oxidation (M)	0.00001000000.0
4	Pavir.Ia02104.1.p|PACid:30213356	Pavir.Ia02104.1.p|PACid:30213356	7906	46496	432	432	24	24	54.4	5.24	189379	1	0	0	540.297	1617.87	3	1617.87	-0.0033	0	51.25	16	30	1.6e-05	R	HTGVMVGMGQK	D	Oxidation (M)	0.00000001000.0
4	Pavir.Ia02104.1.p|PACid:30213356	Pavir.Ia02104.1.p|PACid:30213356	7906	46496	432	432	24	24	54.4	5.24	189381	1	0	0	540.298	1617.87	3	1617.87	-0.0031	0	35.71	16	30	0.00054	R	HTGVMVGMGQK	D	Oxidation (M)	0.00001000000.0
4	Pavir.Ia02104.1.p|PACid:30213356	Pavir.Ia02104.1.p|PACid:30213356	7906	46496	432	432	24	24	54.4	5.24	189382	1	0	0	540.298	1617.87	3	1617.87	-0.0031	0	38.8	15	30	0.00023	R	HTGVMVGMGQK	D	Oxidation (M)	0.00000001000.0
4	Pavir.Ia02104.1.p|PACid:30213356	Pavir.Ia02104.1.p|PACid:30213356	7906	46496	432	432	24	24	54.4	5.24	189384	1	0	0	405.475	1617.87	4	1617.87	-0.0029	0	37.13	22	30	0.0018	R	HTGVMVGMGQK	D	Oxidation (M)	0.00000001000.0
4	Pavir.Ia02104.1.p|PACid:30213356	Pavir.Ia02104.1.p|PACid:30213356	7906	46496	432	432	24	24	54.4	5.24	189385	1	0	0	540.298	1617.87	3	1617.87	-0.0029	0	47.63	15	30	3.4e-05	R	HTGVMVGMGQK	D	Oxidation (M)	0.00000001000.0
4	Pavir.Ia02104.1.p|PACid:30213356	Pavir.Ia02104.1.p|PACid:30213356	7906	46496	432	432	24	24	54.4	5.24	189386	1	0	0	540.298	1617.87	3	1617.87	-0.0027	0	50.76	16	30	1.7e-05	R	HTGVMVGMGQK	D	Oxidation (M)	0.00000001000.0
4	Pavir.Ia02104.1.p|PACid:30213356	Pavir.Ia02104.1.p|PACid:30213356	7906	46496	432	432	24	24	54.4	5.24	189387	1	0	0	540.298	1617.87	3	1617.87	-0.0027	0	20.01	16	30	0.021	R	HTGVMVGMGQK	D	Oxidation (M)	0.00001000000.0
4	Pavir.Ia02104.1.p|PACid:30213356	Pavir.Ia02104.1.p|PACid:30213356	7906	46496	432	432	24	24	54.4	5.24	189390	1	0	0	809.943	1617.87	2	1617.87	-0.0026	0	40	15	30	0.00018	R	HTGVMVGMGQK	D	Oxidation (M)	0.00000001000.0
4	Pavir.Ia02104.1.p|PACid:30213356	Pavir.Ia02104.1.p|PACid:30213356	7906	46496	432	432	24	24	54.4	5.24	189392	1	0	0	809.943	1617.87	2	1617.87	-0.0024	0	16.96	14	30	0.026	R	HTGVMVGMGQK	D	Oxidation (M)	0.00000001000.0
4	Pavir.Ia02104.1.p|PACid:30213356	Pavir.Ia02104.1.p|PACid:30213356	7906	46496	432	432	24	24	54.4	5.24	189393	1	0	0	540.298	1617.87	3	1617.87	-0.0023	0	17.08	14	30	0.025	R	HTGVMVGMGQK	D	Oxidation (M)	0.00001000000.0
4	Pavir.Ia02104.1.p|PACid:30213356	Pavir.Ia02104.1.p|PACid:30213356	7906	46496	432	432	24	24	54.4	5.24	189394	1	0	0	540.298	1617.87	3	1617.87	-0.0023	0	24	14	30	0.0056	R	HTGVMVGMGQK	D	Oxidation (M)	0.00000001000.0
4	Pavir.Ia02104.1.p|PACid:30213356	Pavir.Ia02104.1.p|PACid:30213356	7906	46496	432	432	24	24	54.4	5.24	189395	1	0	0	405.475	1617.87	4	1617.87	-0.0022	0	31.48	16	30	0.0016	R	HTGVMVGMGQK	D	Oxidation (M)	0.00000001000.0
4	Pavir.Ia02104.1.p|PACid:30213356	Pavir.Ia02104.1.p|PACid:30213356	7906	46496	432	432	24	24	54.4	5.24	189396	1	0	0	540.298	1617.87	3	1617.87	-0.0021	0	24.79	14	30	0.0047	R	HTGVMVGMGQK	D	Oxidation (M)	0.00001000000.0
4	Pavir.Ia02104.1.p|PACid:30213356	Pavir.Ia02104.1.p|PACid:30213356	7906	46496	432	432	24	24	54.4	5.24	189397	1	0	0	540.298	1617.87	3	1617.87	-0.0021	0	27.34	14	30	0.0027	R	HTGVMVGMGQK	D	Oxidation (M)	0.00001000000.0
4	Pavir.Ia02104.1.p|PACid:30213356	Pavir.Ia02104.1.p|PACid:30213356	7906	46496	432	432	24	24	54.4	5.24	189398	1	0	0	540.298	1617.87	3	1617.87	-0.0021	0	29.56	14	30	0.0017	R	HTGVMVGMGQK	D	Oxidation (M)	0.00000001000.0
4	Pavir.Ia02104.1.p|PACid:30213356	Pavir.Ia02104.1.p|PACid:30213356	7906	46496	432	432	24	24	54.4	5.24	189400	1	0	0	540.298	1617.87	3	1617.87	-0.0021	0	46.04	15	30	4.8e-05	R	HTGVMVGMGQK	D	Oxidation (M)	0.00000001000.0
4	Pavir.Ia02104.1.p|PACid:30213356	Pavir.Ia02104.1.p|PACid:30213356	7906	46496	432	432	24	24	54.4	5.24	189401	1	0	0	540.298	1617.87	3	1617.87	-0.0021	0	36.05	16	30	0.00053	R	HTGVMVGMGQK	D	Oxidation (M)	0.00001000000.0
4	Pavir.Ia02104.1.p|PACid:30213356	Pavir.Ia02104.1.p|PACid:30213356	7906	46496	432	432	24	24	54.4	5.24	189402	1	0	0	540.298	1617.87	3	1617.87	-0.0021	0	37.78	15	30	0.00033	R	HTGVMVGMGQK	D	Oxidation (M)	0.00001000000.0
4	Pavir.Ia02104.1.p|PACid:30213356	Pavir.Ia02104.1.p|PACid:30213356	7906	46496	432	432	24	24	54.4	5.24	189403	1	0	0	540.298	1617.87	3	1617.87	-0.002	0	33.7	15	30	0.00069	R	HTGVMVGMGQK	D	Oxidation (M)	0.00001000000.0
4	Pavir.Ia02104.1.p|PACid:30213356	Pavir.Ia02104.1.p|PACid:30213356	7906	46496	432	432	24	24	54.4	5.24	189404	1	0	0	540.298	1617.87	3	1617.87	-0.002	0	33.45	15	30	0.00073	R	HTGVMVGMGQK	D	Oxidation (M)	0.00001000000.0
4	Pavir.Ia02104.1.p|PACid:30213356	Pavir.Ia02104.1.p|PACid:30213356	7906	46496	432	432	24	24	54.4	5.24	189405	1	0	0	540.298	1617.87	3	1617.87	-0.002	0	34.36	15	30	0.0006	R	HTGVMVGMGQK	D	Oxidation (M)	0.00000001000.0
4	Pavir.Ia02104.1.p|PACid:30213356	Pavir.Ia02104.1.p|PACid:30213356	7906	46496	432	432	24	24	54.4	5.24	189406	1	0	0	540.298	1617.87	3	1617.87	-0.002	0	39.74	15	30	0.00019	R	HTGVMVGMGQK	D	Oxidation (M)	0.00001000000.0
4	Pavir.Ia02104.1.p|PACid:30213356	Pavir.Ia02104.1.p|PACid:30213356	7906	46496	432	432	24	24	54.4	5.24	189407	1	0	0	540.298	1617.87	3	1617.87	-0.0018	0	35.96	15	30	0.00043	R	HTGVMVGMGQK	D	Oxidation (M)	0.00001000000.0
4	Pavir.Ia02104.1.p|PACid:30213356	Pavir.Ia02104.1.p|PACid:30213356	7906	46496	432	432	24	24	54.4	5.24	189408	1	0	0	540.298	1617.87	3	1617.87	-0.0018	0	43.87	17	30	0.00011	R	HTGVMVGMGQK	D	Oxidation (M)	0.00001000000.0
4	Pavir.Ia02104.1.p|PACid:30213356	Pavir.Ia02104.1.p|PACid:30213356	7906	46496	432	432	24	24	54.4	5.24	189410	1	0	0	540.298	1617.87	3	1617.87	-0.0016	0	28.35	14	30	0.0022	R	HTGVMVGMGQK	D	Oxidation (M)	0.00001000000.0
4	Pavir.Ia02104.1.p|PACid:30213356	Pavir.Ia02104.1.p|PACid:30213356	7906	46496	432	432	24	24	54.4	5.24	189411	1	0	0	540.298	1617.87	3	1617.87	-0.0016	0	31.56	14	30	0.0011	R	HTGVMVGMGQK	D	Oxidation (M)	0.00000001000.0
4	Pavir.Ia02104.1.p|PACid:30213356	Pavir.Ia02104.1.p|PACid:30213356	7906	46496	432	432	24	24	54.4	5.24	189412	1	0	0	809.943	1617.87	2	1617.87	-0.0015	0	51.67	16	30	1.4e-05	R	HTGVMVGMGQK	D	Oxidation (M)	0.00001000000.0
4	Pavir.Ia02104.1.p|PACid:30213356	Pavir.Ia02104.1.p|PACid:30213356	7906	46496	432	432	24	24	54.4	5.24	189413	1	0	0	540.298	1617.87	3	1617.87	-0.0014	0	26.83	14	30	0.003	R	HTGVMVGMGQK	D	Oxidation (M)	0.00001000000.0
4	Pavir.Ia02104.1.p|PACid:30213356	Pavir.Ia02104.1.p|PACid:30213356	7906	46496	432	432	24	24	54.4	5.24	189414	1	0	0	540.298	1617.87	3	1617.87	-0.0014	0	51.27	16	30	1.6e-05	R	HTGVMVGMGQK	D	Oxidation (M)	0.00000001000.0
4	Pavir.Ia02104.1.p|PACid:30213356	Pavir.Ia02104.1.p|PACid:30213356	7906	46496	432	432	24	24	54.4	5.24	189415	1	0	0	540.298	1617.87	3	1617.87	-0.0014	0	35.59	16	30	0.00057	R	HTGVMVGMGQK	D	Oxidation (M)	0.00001000000.0
4	Pavir.Ia02104.1.p|PACid:30213356	Pavir.Ia02104.1.p|PACid:30213356	7906	46496	432	432	24	24	54.4	5.24	189416	1	0	0	809.943	1617.87	2	1617.87	-0.0012	0	37.99	15	30	0.00027	R	HTGVMVGMGQK	D	Oxidation (M)	0.00001000000.0
4	Pavir.Ia02104.1.p|PACid:30213356	Pavir.Ia02104.1.p|PACid:30213356	7906	46496	432	432	24	24	54.4	5.24	189417	1	0	0	540.298	1617.87	3	1617.87	-0.001	0	18.88	14	30	0.017	R	HTGVMVGMGQK	D	Oxidation (M)	0.00000001000.0
4	Pavir.Ia02104.1.p|PACid:30213356	Pavir.Ia02104.1.p|PACid:30213356	7906	46496	432	432	24	24	54.4	5.24	189418	1	0	0	540.298	1617.87	3	1617.87	-0.0009	0	25.14	14	30	0.0044	R	HTGVMVGMGQK	D	Oxidation (M)	0.00001000000.0
4	Pavir.Ia02104.1.p|PACid:30213356	Pavir.Ia02104.1.p|PACid:30213356	7906	46496	432	432	24	24	54.4	5.24	189419	1	0	0	540.298	1617.87	3	1617.87	-0.0009	0	23.94	14	30	0.0057	R	HTGVMVGMGQK	D	Oxidation (M)	0.00001000000.0
4	Pavir.Ia02104.1.p|PACid:30213356	Pavir.Ia02104.1.p|PACid:30213356	7906	46496	432	432	24	24	54.4	5.24	189420	1	0	0	540.298	1617.87	3	1617.87	-0.0007	0	17.43	14	30	0.023	R	HTGVMVGMGQK	D	Oxidation (M)	0.00001000000.0
4	Pavir.Ia02104.1.p|PACid:30213356	Pavir.Ia02104.1.p|PACid:30213356	7906	46496	432	432	24	24	54.4	5.24	189421	1	0	0	809.944	1617.87	2	1617.87	-0.0007	0	29.55	14	30	0.0017	R	HTGVMVGMGQK	D	Oxidation (M)	0.00000001000.0
4	Pavir.Ia02104.1.p|PACid:30213356	Pavir.Ia02104.1.p|PACid:30213356	7906	46496	432	432	24	24	54.4	5.24	189422	1	0	0	540.299	1617.87	3	1617.87	0.0004	0	15.31	13	30	0.037	R	HTGVMVGMGQK	D	Oxidation (M)	0.00001000000.0
4	Pavir.Ia02104.1.p|PACid:30213356	Pavir.Ia02104.1.p|PACid:30213356	7906	46496	432	432	24	24	54.4	5.24	189423	1	0	0	405.476	1617.87	4	1617.87	0.0006	0	14.97	14	30	0.041	R	HTGVMVGMGQK	D	Oxidation (M)	0.00001000000.0
4	Pavir.Ia02104.1.p|PACid:30213356	Pavir.Ia02104.1.p|PACid:30213356	7906	46496	432	432	24	24	54.4	5.24	189428	1	0	0	540.299	1617.88	3	1617.87	0.0024	0	36.28	16	30	0.00049	R	HTGVMVGMGQK	D	Oxidation (M)	0.00001000000.0
4	Pavir.Ia02104.1.p|PACid:30213356	Pavir.Ia02104.1.p|PACid:30213356	7906	46496	432	432	24	24	54.4	5.24	190980	1	0	0	811.463	1620.91	2	1620.92	-0.0042	0	22.18	21	31	0.044	K	EITALAPSSMK	I	Oxidation (M)	0.00000000010.0
4	Pavir.Ia02104.1.p|PACid:30213356	Pavir.Ia02104.1.p|PACid:30213356	7906	46496	432	432	24	24	54.4	5.24	190984	1	0	0	541.311	1620.91	3	1620.92	-0.0038	0	37.8	16	31	0.00038	K	EITALAPSSMK	I	Oxidation (M)	0.00000000010.0
4	Pavir.Ia02104.1.p|PACid:30213356	Pavir.Ia02104.1.p|PACid:30213356	7906	46496	432	432	24	24	54.4	5.24	190987	1	0	0	541.312	1620.91	3	1620.92	-0.0029	0	23	14	31	0.0075	K	EITALAPSSMK	I	Oxidation (M)	0.00000000010.0
4	Pavir.Ia02104.1.p|PACid:30213356	Pavir.Ia02104.1.p|PACid:30213356	7906	46496	432	432	24	24	54.4	5.24	190988	1	0	0	811.464	1620.91	2	1620.92	-0.0029	0	47.29		31	0.0013	K	EITALAPSSMK	I	Oxidation (M)	0.00000000010.0
4	Pavir.Ia02104.1.p|PACid:30213356	Pavir.Ia02104.1.p|PACid:30213356	7906	46496	432	432	24	24	54.4	5.24	190990	1	0	0	541.312	1620.91	3	1620.92	-0.0026	0	17.99	14	31	0.025	K	EITALAPSSMK	I	Oxidation (M)	0.00000000010.0
4	Pavir.Ia02104.1.p|PACid:30213356	Pavir.Ia02104.1.p|PACid:30213356	7906	46496	432	432	24	24	54.4	5.24	190993	1	0	0	811.464	1620.91	2	1620.92	-0.0025	0	49.67		31	0.00073	K	EITALAPSSMK	I	Oxidation (M)	0.00000000010.0
4	Pavir.Ia02104.1.p|PACid:30213356	Pavir.Ia02104.1.p|PACid:30213356	7906	46496	432	432	24	24	54.4	5.24	190995	1	0	0	811.464	1620.91	2	1620.92	-0.0024	0	23.82	20	31	0.023	K	EITALAPSSMK	I	Oxidation (M)	0.00000000010.0
4	Pavir.Ia02104.1.p|PACid:30213356	Pavir.Ia02104.1.p|PACid:30213356	7906	46496	432	432	24	24	54.4	5.24	191002	1	0	0	541.312	1620.91	3	1620.92	-0.0018	0	24.55	14	31	0.005	K	EITALAPSSMK	I	Oxidation (M)	0.00000000010.0
4	Pavir.Ia02104.1.p|PACid:30213356	Pavir.Ia02104.1.p|PACid:30213356	7906	46496	432	432	24	24	54.4	5.24	191005	1	0	0	811.465	1620.91	2	1620.92	-0.0017	0	18.33	14	31	0.022	K	EITALAPSSMK	I	Oxidation (M)	0.00000000010.0
4	Pavir.Ia02104.1.p|PACid:30213356	Pavir.Ia02104.1.p|PACid:30213356	7906	46496	432	432	24	24	54.4	5.24	191007	1	0	0	541.312	1620.91	3	1620.92	-0.0017	0	47.77	19	31	8e-05	K	EITALAPSSMK	I	Oxidation (M)	0.00000000010.0
4	Pavir.Ia02104.1.p|PACid:30213356	Pavir.Ia02104.1.p|PACid:30213356	7906	46496	432	432	24	24	54.4	5.24	191009	1	0	0	541.312	1620.91	3	1620.92	-0.0015	0	36.7	16	31	0.00045	K	EITALAPSSMK	I	Oxidation (M)	0.00000000010.0
4	Pavir.Ia02104.1.p|PACid:30213356	Pavir.Ia02104.1.p|PACid:30213356	7906	46496	432	432	24	24	54.4	5.24	191013	1	0	0	541.312	1620.91	3	1620.92	-0.0013	0	29.29	16	31	0.0024	K	EITALAPSSMK	I	Oxidation (M)	0.00000000010.0
4	Pavir.Ia02104.1.p|PACid:30213356	Pavir.Ia02104.1.p|PACid:30213356	7906	46496	432	432	24	24	54.4	5.24	191014	1	0	0	541.312	1620.91	3	1620.92	-0.0013	0	41.75	20	31	0.00042	K	EITALAPSSMK	I	Oxidation (M)	0.00000000010.0
4	Pavir.Ia02104.1.p|PACid:30213356	Pavir.Ia02104.1.p|PACid:30213356	7906	46496	432	432	24	24	54.4	5.24	191015	1	0	0	541.312	1620.91	3	1620.92	-0.0013	0	42.51	16	31	0.00014	K	EITALAPSSMK	I	Oxidation (M)	0.00000000010.0
4	Pavir.Ia02104.1.p|PACid:30213356	Pavir.Ia02104.1.p|PACid:30213356	7906	46496	432	432	24	24	54.4	5.24	191016	1	0	0	811.465	1620.92	2	1620.92	-0.0011	0	38.07		31	0.01	K	EITALAPSSMK	I	Oxidation (M)	0.00000000010.0
4	Pavir.Ia02104.1.p|PACid:30213356	Pavir.Ia02104.1.p|PACid:30213356	7906	46496	432	432	24	24	54.4	5.24	195908	1	0	0	817.938	1633.86	2	1633.87	-0.0062	0	22.57	14	30	0.0076	R	HTGVMVGMGQK	D	2 Oxidation (M)	0.00001001000.0
4	Pavir.Ia02104.1.p|PACid:30213356	Pavir.Ia02104.1.p|PACid:30213356	7906	46496	432	432	24	24	54.4	5.24	195909	1	0	0	545.628	1633.86	3	1633.87	-0.0055	0	19.16	17	30	0.036	R	HTGVMVGMGQK	D	2 Oxidation (M)	0.00001001000.0
4	Pavir.Ia02104.1.p|PACid:30213356	Pavir.Ia02104.1.p|PACid:30213356	7906	46496	432	432	24	24	54.4	5.24	195912	1	0	0	545.629	1633.86	3	1633.87	-0.0048	0	15.21	13	30	0.037	R	HTGVMVGMGQK	D	2 Oxidation (M)	0.00001001000.0
4	Pavir.Ia02104.1.p|PACid:30213356	Pavir.Ia02104.1.p|PACid:30213356	7906	46496	432	432	24	24	54.4	5.24	195913	1	0	0	817.939	1633.86	2	1633.87	-0.0046	0	18.76	14	30	0.017	R	HTGVMVGMGQK	D	2 Oxidation (M)	0.00001001000.0
4	Pavir.Ia02104.1.p|PACid:30213356	Pavir.Ia02104.1.p|PACid:30213356	7906	46496	432	432	24	24	54.4	5.24	195914	1	0	0	545.629	1633.86	3	1633.87	-0.0045	0	22.32	14	30	0.0083	R	HTGVMVGMGQK	D	2 Oxidation (M)	0.00001001000.0
4	Pavir.Ia02104.1.p|PACid:30213356	Pavir.Ia02104.1.p|PACid:30213356	7906	46496	432	432	24	24	54.4	5.24	195917	1	0	0	545.629	1633.86	3	1633.87	-0.0043	0	21.16	16	30	0.018	R	HTGVMVGMGQK	D	2 Oxidation (M)	0.00001001000.0
4	Pavir.Ia02104.1.p|PACid:30213356	Pavir.Ia02104.1.p|PACid:30213356	7906	46496	432	432	24	24	54.4	5.24	195919	1	0	0	545.629	1633.86	3	1633.87	-0.0041	0	24.02	19	30	0.016	R	HTGVMVGMGQK	D	2 Oxidation (M)	0.00001001000.0
4	Pavir.Ia02104.1.p|PACid:30213356	Pavir.Ia02104.1.p|PACid:30213356	7906	46496	432	432	24	24	54.4	5.24	195922	1	0	0	545.629	1633.86	3	1633.87	-0.0039	0	14.72	14	30	0.045	R	HTGVMVGMGQK	D	2 Oxidation (M)	0.00001001000.0
4	Pavir.Ia02104.1.p|PACid:30213356	Pavir.Ia02104.1.p|PACid:30213356	7906	46496	432	432	24	24	54.4	5.24	195924	1	0	0	545.629	1633.86	3	1633.87	-0.0039	0	14.42	13	30	0.044	R	HTGVMVGMGQK	D	2 Oxidation (M)	0.00001001000.0
4	Pavir.Ia02104.1.p|PACid:30213356	Pavir.Ia02104.1.p|PACid:30213356	7906	46496	432	432	24	24	54.4	5.24	195925	1	0	0	545.629	1633.86	3	1633.87	-0.0039	0	34.06	20	30	0.0024	R	HTGVMVGMGQK	D	2 Oxidation (M)	0.00001001000.0
4	Pavir.Ia02104.1.p|PACid:30213356	Pavir.Ia02104.1.p|PACid:30213356	7906	46496	432	432	24	24	54.4	5.24	195926	1	0	0	545.629	1633.86	3	1633.87	-0.0039	0	26.24	18	30	0.0085	R	HTGVMVGMGQK	D	2 Oxidation (M)	0.00001001000.0
4	Pavir.Ia02104.1.p|PACid:30213356	Pavir.Ia02104.1.p|PACid:30213356	7906	46496	432	432	24	24	54.4	5.24	195927	1	0	0	545.629	1633.86	3	1633.87	-0.0039	0	26.74	14	30	0.0031	R	HTGVMVGMGQK	D	2 Oxidation (M)	0.00001001000.0
4	Pavir.Ia02104.1.p|PACid:30213356	Pavir.Ia02104.1.p|PACid:30213356	7906	46496	432	432	24	24	54.4	5.24	195928	1	0	0	545.629	1633.86	3	1633.87	-0.0039	0	23.91	14	30	0.0057	R	HTGVMVGMGQK	D	2 Oxidation (M)	0.00001001000.0
4	Pavir.Ia02104.1.p|PACid:30213356	Pavir.Ia02104.1.p|PACid:30213356	7906	46496	432	432	24	24	54.4	5.24	195931	1	0	0	545.629	1633.86	3	1633.87	-0.0037	0	30.35	21	30	0.0065	R	HTGVMVGMGQK	D	2 Oxidation (M)	0.00001001000.0
4	Pavir.Ia02104.1.p|PACid:30213356	Pavir.Ia02104.1.p|PACid:30213356	7906	46496	432	432	24	24	54.4	5.24	195932	1	0	0	545.629	1633.87	3	1633.87	-0.0035	0	25.77	16	30	0.006	R	HTGVMVGMGQK	D	2 Oxidation (M)	0.00001001000.0
4	Pavir.Ia02104.1.p|PACid:30213356	Pavir.Ia02104.1.p|PACid:30213356	7906	46496	432	432	24	24	54.4	5.24	195933	1	0	0	545.629	1633.87	3	1633.87	-0.0035	0	28.77	20	30	0.0071	R	HTGVMVGMGQK	D	2 Oxidation (M)	0.00001001000.0
4	Pavir.Ia02104.1.p|PACid:30213356	Pavir.Ia02104.1.p|PACid:30213356	7906	46496	432	432	24	24	54.4	5.24	195935	1	0	0	545.629	1633.87	3	1633.87	-0.0035	0	24.92	14	30	0.0046	R	HTGVMVGMGQK	D	2 Oxidation (M)	0.00001001000.0
4	Pavir.Ia02104.1.p|PACid:30213356	Pavir.Ia02104.1.p|PACid:30213356	7906	46496	432	432	24	24	54.4	5.24	195941	1	0	0	545.629	1633.87	3	1633.87	-0.0033	0	17.72	16	30	0.039	R	HTGVMVGMGQK	D	2 Oxidation (M)	0.00001001000.0
4	Pavir.Ia02104.1.p|PACid:30213356	Pavir.Ia02104.1.p|PACid:30213356	7906	46496	432	432	24	24	54.4	5.24	195943	1	0	0	545.629	1633.87	3	1633.87	-0.0033	0	27.72	19	30	0.007	R	HTGVMVGMGQK	D	2 Oxidation (M)	0.00001001000.0
4	Pavir.Ia02104.1.p|PACid:30213356	Pavir.Ia02104.1.p|PACid:30213356	7906	46496	432	432	24	24	54.4	5.24	195944	1	0	0	545.629	1633.87	3	1633.87	-0.0033	0	34.78	20	30	0.002	R	HTGVMVGMGQK	D	2 Oxidation (M)	0.00001001000.0
4	Pavir.Ia02104.1.p|PACid:30213356	Pavir.Ia02104.1.p|PACid:30213356	7906	46496	432	432	24	24	54.4	5.24	195945	1	0	0	545.629	1633.87	3	1633.87	-0.0033	0	31.16	15	30	0.0015	R	HTGVMVGMGQK	D	2 Oxidation (M)	0.00001001000.0
4	Pavir.Ia02104.1.p|PACid:30213356	Pavir.Ia02104.1.p|PACid:30213356	7906	46496	432	432	24	24	54.4	5.24	195946	1	0	0	545.629	1633.87	3	1633.87	-0.0033	0	41.05	17	30	0.00024	R	HTGVMVGMGQK	D	2 Oxidation (M)	0.00001001000.0
4	Pavir.Ia02104.1.p|PACid:30213356	Pavir.Ia02104.1.p|PACid:30213356	7906	46496	432	432	24	24	54.4	5.24	195948	1	0	0	545.629	1633.87	3	1633.87	-0.0032	0	14.27	13	30	0.046	R	HTGVMVGMGQK	D	2 Oxidation (M)	0.00001001000.0
4	Pavir.Ia02104.1.p|PACid:30213356	Pavir.Ia02104.1.p|PACid:30213356	7906	46496	432	432	24	24	54.4	5.24	195951	1	0	0	545.629	1633.87	3	1633.87	-0.0032	0	37.57	25	30	0.0028	R	HTGVMVGMGQK	D	2 Oxidation (M)	0.00001001000.0
4	Pavir.Ia02104.1.p|PACid:30213356	Pavir.Ia02104.1.p|PACid:30213356	7906	46496	432	432	24	24	54.4	5.24	195952	1	0	0	545.629	1633.87	3	1633.87	-0.0032	0	31.78	20	30	0.0034	R	HTGVMVGMGQK	D	2 Oxidation (M)	0.00001001000.0
4	Pavir.Ia02104.1.p|PACid:30213356	Pavir.Ia02104.1.p|PACid:30213356	7906	46496	432	432	24	24	54.4	5.24	195953	1	0	0	545.629	1633.87	3	1633.87	-0.0032	0	41.44	22	30	0.00069	R	HTGVMVGMGQK	D	2 Oxidation (M)	0.00001001000.0
4	Pavir.Ia02104.1.p|PACid:30213356	Pavir.Ia02104.1.p|PACid:30213356	7906	46496	432	432	24	24	54.4	5.24	195955	1	0	0	545.629	1633.87	3	1633.87	-0.003	0	16.49	14	30	0.028	R	HTGVMVGMGQK	D	2 Oxidation (M)	0.00001001000.0
4	Pavir.Ia02104.1.p|PACid:30213356	Pavir.Ia02104.1.p|PACid:30213356	7906	46496	432	432	24	24	54.4	5.24	195957	1	0	0	545.629	1633.87	3	1633.87	-0.003	0	16.92	14	30	0.026	R	HTGVMVGMGQK	D	2 Oxidation (M)	0.00001001000.0
4	Pavir.Ia02104.1.p|PACid:30213356	Pavir.Ia02104.1.p|PACid:30213356	7906	46496	432	432	24	24	54.4	5.24	195958	1	0	0	545.629	1633.87	3	1633.87	-0.003	0	28.61	24	30	0.019	R	HTGVMVGMGQK	D	2 Oxidation (M)	0.00001001000.0
4	Pavir.Ia02104.1.p|PACid:30213356	Pavir.Ia02104.1.p|PACid:30213356	7906	46496	432	432	24	24	54.4	5.24	195960	1	0	0	545.629	1633.87	3	1633.87	-0.003	0	30.58	21	30	0.0066	R	HTGVMVGMGQK	D	2 Oxidation (M)	0.00001001000.0
4	Pavir.Ia02104.1.p|PACid:30213356	Pavir.Ia02104.1.p|PACid:30213356	7906	46496	432	432	24	24	54.4	5.24	195961	1	0	0	545.629	1633.87	3	1633.87	-0.003	0	31.9	14	30	0.001	R	HTGVMVGMGQK	D	2 Oxidation (M)	0.00001001000.0
4	Pavir.Ia02104.1.p|PACid:30213356	Pavir.Ia02104.1.p|PACid:30213356	7906	46496	432	432	24	24	54.4	5.24	195962	1	0	0	545.629	1633.87	3	1633.87	-0.003	0	33.79	15	30	0.00068	R	HTGVMVGMGQK	D	2 Oxidation (M)	0.00001001000.0
4	Pavir.Ia02104.1.p|PACid:30213356	Pavir.Ia02104.1.p|PACid:30213356	7906	46496	432	432	24	24	54.4	5.24	195963	1	0	0	409.474	1633.87	4	1633.87	-0.0028	0	14.29	13	30	0.046	R	HTGVMVGMGQK	D	2 Oxidation (M)	0.00001001000.0
4	Pavir.Ia02104.1.p|PACid:30213356	Pavir.Ia02104.1.p|PACid:30213356	7906	46496	432	432	24	24	54.4	5.24	195964	1	0	0	545.629	1633.87	3	1633.87	-0.0028	0	19.26	15	30	0.02	R	HTGVMVGMGQK	D	2 Oxidation (M)	0.00001001000.0
4	Pavir.Ia02104.1.p|PACid:30213356	Pavir.Ia02104.1.p|PACid:30213356	7906	46496	432	432	24	24	54.4	5.24	195968	1	0	0	545.629	1633.87	3	1633.87	-0.0028	0	29.28	23	30	0.013	R	HTGVMVGMGQK	D	2 Oxidation (M)	0.00001001000.0
4	Pavir.Ia02104.1.p|PACid:30213356	Pavir.Ia02104.1.p|PACid:30213356	7906	46496	432	432	24	24	54.4	5.24	195969	1	0	0	545.629	1633.87	3	1633.87	-0.0028	0	27.77	20	30	0.0091	R	HTGVMVGMGQK	D	2 Oxidation (M)	0.00001001000.0
4	Pavir.Ia02104.1.p|PACid:30213356	Pavir.Ia02104.1.p|PACid:30213356	7906	46496	432	432	24	24	54.4	5.24	195970	1	0	0	545.629	1633.87	3	1633.87	-0.0028	0	22.74	14	30	0.0079	R	HTGVMVGMGQK	D	2 Oxidation (M)	0.00001001000.0
4	Pavir.Ia02104.1.p|PACid:30213356	Pavir.Ia02104.1.p|PACid:30213356	7906	46496	432	432	24	24	54.4	5.24	195971	1	0	0	545.629	1633.87	3	1633.87	-0.0028	0	41.48	24	30	0.00092	R	HTGVMVGMGQK	D	2 Oxidation (M)	0.00001001000.0
4	Pavir.Ia02104.1.p|PACid:30213356	Pavir.Ia02104.1.p|PACid:30213356	7906	46496	432	432	24	24	54.4	5.24	195972	1	0	0	545.629	1633.87	3	1633.87	-0.0028	0	36.08	21	30	0.0019	R	HTGVMVGMGQK	D	2 Oxidation (M)	0.00001001000.0
4	Pavir.Ia02104.1.p|PACid:30213356	Pavir.Ia02104.1.p|PACid:30213356	7906	46496	432	432	24	24	54.4	5.24	195973	1	0	0	545.629	1633.87	3	1633.87	-0.0028	0	38.96	17	30	0.00037	R	HTGVMVGMGQK	D	2 Oxidation (M)	0.00001001000.0
4	Pavir.Ia02104.1.p|PACid:30213356	Pavir.Ia02104.1.p|PACid:30213356	7906	46496	432	432	24	24	54.4	5.24	195974	1	0	0	545.629	1633.87	3	1633.87	-0.0028	0	40.77	23	30	0.00087	R	HTGVMVGMGQK	D	2 Oxidation (M)	0.00001001000.0
4	Pavir.Ia02104.1.p|PACid:30213356	Pavir.Ia02104.1.p|PACid:30213356	7906	46496	432	432	24	24	54.4	5.24	195976	1	0	0	545.629	1633.87	3	1633.87	-0.0026	0	34.99	22	30	0.0028	R	HTGVMVGMGQK	D	2 Oxidation (M)	0.00001001000.0
4	Pavir.Ia02104.1.p|PACid:30213356	Pavir.Ia02104.1.p|PACid:30213356	7906	46496	432	432	24	24	54.4	5.24	195977	1	0	0	545.629	1633.87	3	1633.87	-0.0026	0	36.62	22	30	0.0021	R	HTGVMVGMGQK	D	2 Oxidation (M)	0.00001001000.0
4	Pavir.Ia02104.1.p|PACid:30213356	Pavir.Ia02104.1.p|PACid:30213356	7906	46496	432	432	24	24	54.4	5.24	195978	1	0	0	545.629	1633.87	3	1633.87	-0.0026	0	37.97	23	30	0.002	R	HTGVMVGMGQK	D	2 Oxidation (M)	0.00001001000.0
4	Pavir.Ia02104.1.p|PACid:30213356	Pavir.Ia02104.1.p|PACid:30213356	7906	46496	432	432	24	24	54.4	5.24	195979	1	0	0	545.629	1633.87	3	1633.87	-0.0026	0	33.55	20	30	0.0027	R	HTGVMVGMGQK	D	2 Oxidation (M)	0.00001001000.0
4	Pavir.Ia02104.1.p|PACid:30213356	Pavir.Ia02104.1.p|PACid:30213356	7906	46496	432	432	24	24	54.4	5.24	195980	1	0	0	545.629	1633.87	3	1633.87	-0.0026	0	33.4	15	30	0.00074	R	HTGVMVGMGQK	D	2 Oxidation (M)	0.00001001000.0
4	Pavir.Ia02104.1.p|PACid:30213356	Pavir.Ia02104.1.p|PACid:30213356	7906	46496	432	432	24	24	54.4	5.24	195982	1	0	0	545.629	1633.87	3	1633.87	-0.0024	0	23.24	21	30	0.03	R	HTGVMVGMGQK	D	2 Oxidation (M)	0.00001001000.0
4	Pavir.Ia02104.1.p|PACid:30213356	Pavir.Ia02104.1.p|PACid:30213356	7906	46496	432	432	24	24	54.4	5.24	195984	1	0	0	545.629	1633.87	3	1633.87	-0.0024	0	13.95	13	30	0.049	R	HTGVMVGMGQK	D	2 Oxidation (M)	0.00001001000.0
4	Pavir.Ia02104.1.p|PACid:30213356	Pavir.Ia02104.1.p|PACid:30213356	7906	46496	432	432	24	24	54.4	5.24	195985	1	0	0	545.629	1633.87	3	1633.87	-0.0024	0	24.23	14	30	0.0053	R	HTGVMVGMGQK	D	2 Oxidation (M)	0.00001001000.0
4	Pavir.Ia02104.1.p|PACid:30213356	Pavir.Ia02104.1.p|PACid:30213356	7906	46496	432	432	24	24	54.4	5.24	195987	1	0	0	545.629	1633.87	3	1633.87	-0.0024	0	36.34	22	30	0.002	R	HTGVMVGMGQK	D	2 Oxidation (M)	0.00001001000.0
4	Pavir.Ia02104.1.p|PACid:30213356	Pavir.Ia02104.1.p|PACid:30213356	7906	46496	432	432	24	24	54.4	5.24	195989	1	0	0	545.629	1633.87	3	1633.87	-0.0024	0	40.52	21	30	0.0007	R	HTGVMVGMGQK	D	2 Oxidation (M)	0.00001001000.0
4	Pavir.Ia02104.1.p|PACid:30213356	Pavir.Ia02104.1.p|PACid:30213356	7906	46496	432	432	24	24	54.4	5.24	195990	1	0	0	409.474	1633.87	4	1633.87	-0.0023	0	23.8	15	30	0.0077	R	HTGVMVGMGQK	D	2 Oxidation (M)	0.00001001000.0
4	Pavir.Ia02104.1.p|PACid:30213356	Pavir.Ia02104.1.p|PACid:30213356	7906	46496	432	432	24	24	54.4	5.24	195995	1	0	0	545.629	1633.87	3	1633.87	-0.0023	0	27.56	17	30	0.0051	R	HTGVMVGMGQK	D	2 Oxidation (M)	0.00001001000.0
4	Pavir.Ia02104.1.p|PACid:30213356	Pavir.Ia02104.1.p|PACid:30213356	7906	46496	432	432	24	24	54.4	5.24	195996	1	0	0	545.629	1633.87	3	1633.87	-0.0023	0	15.28	13	30	0.037	R	HTGVMVGMGQK	D	2 Oxidation (M)	0.00001001000.0
4	Pavir.Ia02104.1.p|PACid:30213356	Pavir.Ia02104.1.p|PACid:30213356	7906	46496	432	432	24	24	54.4	5.24	195998	1	0	0	545.629	1633.87	3	1633.87	-0.0023	0	32.81	15	30	0.00084	R	HTGVMVGMGQK	D	2 Oxidation (M)	0.00001001000.0
4	Pavir.Ia02104.1.p|PACid:30213356	Pavir.Ia02104.1.p|PACid:30213356	7906	46496	432	432	24	24	54.4	5.24	196004	1	0	0	817.941	1633.87	2	1633.87	-0.0021	0	23.58	14	30	0.0061	R	HTGVMVGMGQK	D	2 Oxidation (M)	0.00001001000.0
4	Pavir.Ia02104.1.p|PACid:30213356	Pavir.Ia02104.1.p|PACid:30213356	7906	46496	432	432	24	24	54.4	5.24	196009	1	0	0	545.63	1633.87	3	1633.87	-0.0021	0	34.9	24	30	0.0048	R	HTGVMVGMGQK	D	2 Oxidation (M)	0.00001001000.0
4	Pavir.Ia02104.1.p|PACid:30213356	Pavir.Ia02104.1.p|PACid:30213356	7906	46496	432	432	24	24	54.4	5.24	196010	1	0	0	545.63	1633.87	3	1633.87	-0.0021	0	33.54	19	30	0.0022	R	HTGVMVGMGQK	D	2 Oxidation (M)	0.00001001000.0
4	Pavir.Ia02104.1.p|PACid:30213356	Pavir.Ia02104.1.p|PACid:30213356	7906	46496	432	432	24	24	54.4	5.24	196011	1	0	0	545.63	1633.87	3	1633.87	-0.0021	0	31.44	24	30	0.01	R	HTGVMVGMGQK	D	2 Oxidation (M)	0.00001001000.0
4	Pavir.Ia02104.1.p|PACid:30213356	Pavir.Ia02104.1.p|PACid:30213356	7906	46496	432	432	24	24	54.4	5.24	196013	1	0	0	545.63	1633.87	3	1633.87	-0.0021	0	22.18	14	30	0.0083	R	HTGVMVGMGQK	D	2 Oxidation (M)	0.00001001000.0
4	Pavir.Ia02104.1.p|PACid:30213356	Pavir.Ia02104.1.p|PACid:30213356	7906	46496	432	432	24	24	54.4	5.24	196014	1	0	0	545.63	1633.87	3	1633.87	-0.0021	0	35.48	21	30	0.0021	R	HTGVMVGMGQK	D	2 Oxidation (M)	0.00001001000.0
4	Pavir.Ia02104.1.p|PACid:30213356	Pavir.Ia02104.1.p|PACid:30213356	7906	46496	432	432	24	24	54.4	5.24	196015	1	0	0	545.63	1633.87	3	1633.87	-0.0019	0	20.83	14	30	0.012	R	HTGVMVGMGQK	D	2 Oxidation (M)	0.00001001000.0
4	Pavir.Ia02104.1.p|PACid:30213356	Pavir.Ia02104.1.p|PACid:30213356	7906	46496	432	432	24	24	54.4	5.24	196016	1	0	0	545.63	1633.87	3	1633.87	-0.0019	0	25.42	15	30	0.0049	R	HTGVMVGMGQK	D	2 Oxidation (M)	0.00001001000.0
4	Pavir.Ia02104.1.p|PACid:30213356	Pavir.Ia02104.1.p|PACid:30213356	7906	46496	432	432	24	24	54.4	5.24	196018	1	0	0	545.63	1633.87	3	1633.87	-0.0019	0	32.72	18	30	0.0021	R	HTGVMVGMGQK	D	2 Oxidation (M)	0.00001001000.0
4	Pavir.Ia02104.1.p|PACid:30213356	Pavir.Ia02104.1.p|PACid:30213356	7906	46496	432	432	24	24	54.4	5.24	196019	1	0	0	545.63	1633.87	3	1633.87	-0.0019	0	25.65	22	30	0.023	R	HTGVMVGMGQK	D	2 Oxidation (M)	0.00001001000.0
4	Pavir.Ia02104.1.p|PACid:30213356	Pavir.Ia02104.1.p|PACid:30213356	7906	46496	432	432	24	24	54.4	5.24	196020	1	0	0	545.63	1633.87	3	1633.87	-0.0019	0	46.13	27	30	0.00063	R	HTGVMVGMGQK	D	2 Oxidation (M)	0.00001001000.0
4	Pavir.Ia02104.1.p|PACid:30213356	Pavir.Ia02104.1.p|PACid:30213356	7906	46496	432	432	24	24	54.4	5.24	196021	1	0	0	545.63	1633.87	3	1633.87	-0.0019	0	41.63	23	30	0.00074	R	HTGVMVGMGQK	D	2 Oxidation (M)	0.00001001000.0
4	Pavir.Ia02104.1.p|PACid:30213356	Pavir.Ia02104.1.p|PACid:30213356	7906	46496	432	432	24	24	54.4	5.24	196022	1	0	0	545.63	1633.87	3	1633.87	-0.0017	0	32.78	21	30	0.0034	R	HTGVMVGMGQK	D	2 Oxidation (M)	0.00001001000.0
4	Pavir.Ia02104.1.p|PACid:30213356	Pavir.Ia02104.1.p|PACid:30213356	7906	46496	432	432	24	24	54.4	5.24	196023	1	0	0	545.63	1633.87	3	1633.87	-0.0017	0	30.32	24	30	0.012	R	HTGVMVGMGQK	D	2 Oxidation (M)	0.00001001000.0
4	Pavir.Ia02104.1.p|PACid:30213356	Pavir.Ia02104.1.p|PACid:30213356	7906	46496	432	432	24	24	54.4	5.24	196027	1	0	0	545.63	1633.87	3	1633.87	-0.0015	0	15.98	13	30	0.032	R	HTGVMVGMGQK	D	2 Oxidation (M)	0.00001001000.0
4	Pavir.Ia02104.1.p|PACid:30213356	Pavir.Ia02104.1.p|PACid:30213356	7906	46496	432	432	24	24	54.4	5.24	196029	1	0	0	545.63	1633.87	3	1633.87	-0.0015	0	35.24	24	30	0.0046	R	HTGVMVGMGQK	D	2 Oxidation (M)	0.00001001000.0
4	Pavir.Ia02104.1.p|PACid:30213356	Pavir.Ia02104.1.p|PACid:30213356	7906	46496	432	432	24	24	54.4	5.24	196030	1	0	0	545.63	1633.87	3	1633.87	-0.0015	0	22.99	14	30	0.007	R	HTGVMVGMGQK	D	2 Oxidation (M)	0.00001001000.0
4	Pavir.Ia02104.1.p|PACid:30213356	Pavir.Ia02104.1.p|PACid:30213356	7906	46496	432	432	24	24	54.4	5.24	196031	1	0	0	545.63	1633.87	3	1633.87	-0.0015	0	36.37	17	30	0.0006	R	HTGVMVGMGQK	D	2 Oxidation (M)	0.00001001000.0
4	Pavir.Ia02104.1.p|PACid:30213356	Pavir.Ia02104.1.p|PACid:30213356	7906	46496	432	432	24	24	54.4	5.24	196032	1	0	0	545.63	1633.87	3	1633.87	-0.0015	0	27.37	14	30	0.0027	R	HTGVMVGMGQK	D	2 Oxidation (M)	0.00001001000.0
4	Pavir.Ia02104.1.p|PACid:30213356	Pavir.Ia02104.1.p|PACid:30213356	7906	46496	432	432	24	24	54.4	5.24	196035	1	0	0	545.63	1633.87	3	1633.87	-0.0013	0	32.6	17	30	0.0014	R	HTGVMVGMGQK	D	2 Oxidation (M)	0.00001001000.0
4	Pavir.Ia02104.1.p|PACid:30213356	Pavir.Ia02104.1.p|PACid:30213356	7906	46496	432	432	24	24	54.4	5.24	196036	1	0	0	545.63	1633.87	3	1633.87	-0.0013	0	31.04	24	30	0.01	R	HTGVMVGMGQK	D	2 Oxidation (M)	0.00001001000.0
4	Pavir.Ia02104.1.p|PACid:30213356	Pavir.Ia02104.1.p|PACid:30213356	7906	46496	432	432	24	24	54.4	5.24	196037	1	0	0	545.63	1633.87	3	1633.87	-0.0013	0	26.98	15	30	0.0034	R	HTGVMVGMGQK	D	2 Oxidation (M)	0.00001001000.0
4	Pavir.Ia02104.1.p|PACid:30213356	Pavir.Ia02104.1.p|PACid:30213356	7906	46496	432	432	24	24	54.4	5.24	196038	1	0	0	545.63	1633.87	3	1633.87	-0.0013	0	14.78	14	30	0.046	R	HTGVMVGMGQK	D	2 Oxidation (M)	0.00001001000.0
4	Pavir.Ia02104.1.p|PACid:30213356	Pavir.Ia02104.1.p|PACid:30213356	7906	46496	432	432	24	24	54.4	5.24	196040	1	0	0	545.63	1633.87	3	1633.87	-0.0012	0	29.4	23	30	0.011	R	HTGVMVGMGQK	D	2 Oxidation (M)	0.00001001000.0
4	Pavir.Ia02104.1.p|PACid:30213356	Pavir.Ia02104.1.p|PACid:30213356	7906	46496	432	432	24	24	54.4	5.24	196041	1	0	0	409.474	1633.87	4	1633.87	-0.0011	0	30.6	16	30	0.0018	R	HTGVMVGMGQK	D	2 Oxidation (M)	0.00001001000.0
4	Pavir.Ia02104.1.p|PACid:30213356	Pavir.Ia02104.1.p|PACid:30213356	7906	46496	432	432	24	24	54.4	5.24	196042	1	0	0	545.63	1633.87	3	1633.87	-0.001	0	38.86	22	30	0.0012	R	HTGVMVGMGQK	D	2 Oxidation (M)	0.00001001000.0
4	Pavir.Ia02104.1.p|PACid:30213356	Pavir.Ia02104.1.p|PACid:30213356	7906	46496	432	432	24	24	54.4	5.24	196043	1	0	0	545.63	1633.87	3	1633.87	-0.0008	0	23.42	14	30	0.0064	R	HTGVMVGMGQK	D	2 Oxidation (M)	0.00001001000.0
4	Pavir.Ia02104.1.p|PACid:30213356	Pavir.Ia02104.1.p|PACid:30213356	7906	46496	432	432	24	24	54.4	5.24	196045	1	0	0	545.63	1633.87	3	1633.87	-0.0008	0	32.65	24	30	0.0068	R	HTGVMVGMGQK	D	2 Oxidation (M)	0.00001001000.0
4	Pavir.Ia02104.1.p|PACid:30213356	Pavir.Ia02104.1.p|PACid:30213356	7906	46496	432	432	24	24	54.4	5.24	196046	1	0	0	545.63	1633.87	3	1633.87	-0.0008	0	25.74	16	30	0.0065	R	HTGVMVGMGQK	D	2 Oxidation (M)	0.00001001000.0
4	Pavir.Ia02104.1.p|PACid:30213356	Pavir.Ia02104.1.p|PACid:30213356	7906	46496	432	432	24	24	54.4	5.24	196047	1	0	0	545.63	1633.87	3	1633.87	-0.0008	0	29.85	24	30	0.014	R	HTGVMVGMGQK	D	2 Oxidation (M)	0.00001001000.0
4	Pavir.Ia02104.1.p|PACid:30213356	Pavir.Ia02104.1.p|PACid:30213356	7906	46496	432	432	24	24	54.4	5.24	196048	1	0	0	545.63	1633.87	3	1633.87	-0.0008	0	43.35	26	30	0.0011	R	HTGVMVGMGQK	D	2 Oxidation (M)	0.00001001000.0
4	Pavir.Ia02104.1.p|PACid:30213356	Pavir.Ia02104.1.p|PACid:30213356	7906	46496	432	432	24	24	54.4	5.24	196049	1	0	0	545.63	1633.87	3	1633.87	-0.0006	0	36.55	16	30	0.00049	R	HTGVMVGMGQK	D	2 Oxidation (M)	0.00001001000.0
4	Pavir.Ia02104.1.p|PACid:30213356	Pavir.Ia02104.1.p|PACid:30213356	7906	46496	432	432	24	24	54.4	5.24	196053	1	0	0	545.63	1633.87	3	1633.87	0	0	17.05	14	30	0.025	R	HTGVMVGMGQK	D	2 Oxidation (M)	0.00001001000.0
4	Pavir.Ia02104.1.p|PACid:30213356	Pavir.Ia02104.1.p|PACid:30213356	7906	46496	432	432	24	24	54.4	5.24	196055	1	0	0	545.63	1633.87	3	1633.87	0	0	22.71	18	30	0.019	R	HTGVMVGMGQK	D	2 Oxidation (M)	0.00001001000.0
4	Pavir.Ia02104.1.p|PACid:30213356	Pavir.Ia02104.1.p|PACid:30213356	7906	46496	432	432	24	24	54.4	5.24	196056	1	0	0	545.63	1633.87	3	1633.87	0.0001	0	29.74	18	30	0.0035	R	HTGVMVGMGQK	D	2 Oxidation (M)	0.00001001000.0
4	Pavir.Ia02104.1.p|PACid:30213356	Pavir.Ia02104.1.p|PACid:30213356	7906	46496	432	432	24	24	54.4	5.24	196429	1	0	0	545.957	1634.85	3	1634.85	-0.0034	0	29.2	15	29	0.0023	R	HTGVMVGMGQK	D	2 Oxidation (M); Deamidated (NQ)	0.00001001020.0
4	Pavir.Ia02104.1.p|PACid:30213356	Pavir.Ia02104.1.p|PACid:30213356	7906	46496	432	432	24	24	54.4	5.24	196432	1	0	0	545.957	1634.85	3	1634.85	-0.0026	0	29.25	21	29	0.0079	R	HTGVMVGMGQK	D	2 Oxidation (M); Deamidated (NQ)	0.00001001020.0
4	Pavir.Ia02104.1.p|PACid:30213356	Pavir.Ia02104.1.p|PACid:30213356	7906	46496	432	432	24	24	54.4	5.24	196434	1	0	0	545.958	1634.85	3	1634.85	-0.0004	0	23.97	14	29	0.0056	R	HTGVMVGMGQK	D	2 Oxidation (M); Deamidated (NQ)	0.00001001020.0
4	Pavir.Ia02104.1.p|PACid:30213356	Pavir.Ia02104.1.p|PACid:30213356	7906	46496	432	432	24	24	54.4	5.24	198285	1	0	0	547.621	1639.84	3	1639.85	-0.0035	0	27.39	24	29	0.023	K	DAYVGDEAQSK	R
4	Pavir.Ia02104.1.p|PACid:30213356	Pavir.Ia02104.1.p|PACid:30213356	7906	46496	432	432	24	24	54.4	5.24	198287	1	0	0	820.929	1639.84	2	1639.85	-0.003	0	66.3	27	29	6.7e-06	K	DAYVGDEAQSK	R
4	Pavir.Ia02104.1.p|PACid:30213356	Pavir.Ia02104.1.p|PACid:30213356	7906	46496	432	432	24	24	54.4	5.24	198288	1	0	0	547.622	1639.84	3	1639.85	-0.003	0	50.34	25	29	0.00018	K	DAYVGDEAQSK	R
4	Pavir.Ia02104.1.p|PACid:30213356	Pavir.Ia02104.1.p|PACid:30213356	7906	46496	432	432	24	24	54.4	5.24	198289	1	0	0	820.929	1639.84	2	1639.85	-0.0029	0	70.96		29	3.3e-06	K	DAYVGDEAQSK	R
4	Pavir.Ia02104.1.p|PACid:30213356	Pavir.Ia02104.1.p|PACid:30213356	7906	46496	432	432	24	24	54.4	5.24	198290	1	0	0	820.929	1639.84	2	1639.85	-0.0029	0	71.82		29	2.7e-06	K	DAYVGDEAQSK	R
4	Pavir.Ia02104.1.p|PACid:30213356	Pavir.Ia02104.1.p|PACid:30213356	7906	46496	432	432	24	24	54.4	5.24	198291	1	0	0	820.929	1639.84	2	1639.85	-0.0028	0	66.74	26	29	4.6e-06	K	DAYVGDEAQSK	R
4	Pavir.Ia02104.1.p|PACid:30213356	Pavir.Ia02104.1.p|PACid:30213356	7906	46496	432	432	24	24	54.4	5.24	198293	1	0	0	547.622	1639.84	3	1639.85	-0.0021	0	64.33		29	1.5e-05	K	DAYVGDEAQSK	R
4	Pavir.Ia02104.1.p|PACid:30213356	Pavir.Ia02104.1.p|PACid:30213356	7906	46496	432	432	24	24	54.4	5.24	198294	1	0	0	820.929	1639.84	2	1639.85	-0.0019	0	77		29	8.1e-07	K	DAYVGDEAQSK	R
4	Pavir.Ia02104.1.p|PACid:30213356	Pavir.Ia02104.1.p|PACid:30213356	7906	46496	432	432	24	24	54.4	5.24	198295	1	0	0	547.622	1639.84	3	1639.85	-0.0019	0	44.55	26	29	0.00084	K	DAYVGDEAQSK	R
4	Pavir.Ia02104.1.p|PACid:30213356	Pavir.Ia02104.1.p|PACid:30213356	7906	46496	432	432	24	24	54.4	5.24	198298	1	0	0	820.929	1639.84	2	1639.85	-0.0015	0	27.75	23	29	0.017	K	DAYVGDEAQSK	R
4	Pavir.Ia02104.1.p|PACid:30213356	Pavir.Ia02104.1.p|PACid:30213356	7906	46496	432	432	24	24	54.4	5.24	198299	1	0	0	820.929	1639.84	2	1639.85	-0.0015	0	60.35		29	3.8e-05	K	DAYVGDEAQSK	R
4	Pavir.Ia02104.1.p|PACid:30213356	Pavir.Ia02104.1.p|PACid:30213356	7906	46496	432	432	24	24	54.4	5.24	198656	1	0	0	821.42	1640.83	2	1640.83	-0.0047	0	34.24	15	28	0.00062	K	DAYVGDEAQSK	R	Deamidated (NQ)	0.00000000200.0
4	Pavir.Ia02104.1.p|PACid:30213356	Pavir.Ia02104.1.p|PACid:30213356	7906	46496	432	432	24	24	54.4	5.24	240011	1	1	1	582.294	1743.86	3	1743.86	-0.0039	0	68.71	17	28	3.6e-07	R	EEYEESGPAIVHR	K
4	Pavir.Ia02104.1.p|PACid:30213356	Pavir.Ia02104.1.p|PACid:30213356	7906	46496	432	432	24	24	54.4	5.24	240012	1	1	1	582.294	1743.86	3	1743.86	-0.0036	0	63.2	16	28	1.2e-06	R	EEYEESGPAIVHR	K
4	Pavir.Ia02104.1.p|PACid:30213356	Pavir.Ia02104.1.p|PACid:30213356	7906	46496	432	432	24	24	54.4	5.24	240014	1	1	1	582.294	1743.86	3	1743.86	-0.0025	0	62.53	16	28	1.4e-06	R	EEYEESGPAIVHR	K
4	Pavir.Ia02104.1.p|PACid:30213356	Pavir.Ia02104.1.p|PACid:30213356	7906	46496	432	432	24	24	54.4	5.24	240015	1	1	1	582.294	1743.86	3	1743.86	-0.0025	0	62.44	16	28	1.4e-06	R	EEYEESGPAIVHR	K
4	Pavir.Ia02104.1.p|PACid:30213356	Pavir.Ia02104.1.p|PACid:30213356	7906	46496	432	432	24	24	54.4	5.24	240017	1	1	1	582.294	1743.86	3	1743.86	-0.0014	0	62.17	16	28	1.5e-06	R	EEYEESGPAIVHR	K
4	Pavir.Ia02104.1.p|PACid:30213356	Pavir.Ia02104.1.p|PACid:30213356	7906	46496	432	432	24	24	54.4	5.24	258983	1	0	0	898.978	1795.94	2	1795.95	-0.005	1	52.51		30	0.00034	K	DAYVGDEAQSKR	G
4	Pavir.Ia02104.1.p|PACid:30213356	Pavir.Ia02104.1.p|PACid:30213356	7906	46496	432	432	24	24	54.4	5.24	258993	1	0	0	599.655	1795.94	3	1795.95	-0.0045	1	31.8	21	30	0.0048	K	DAYVGDEAQSKR	G
4	Pavir.Ia02104.1.p|PACid:30213356	Pavir.Ia02104.1.p|PACid:30213356	7906	46496	432	432	24	24	54.4	5.24	259005	1	0	0	898.979	1795.94	2	1795.95	-0.0039	1	44.65		30	0.0021	K	DAYVGDEAQSKR	G
4	Pavir.Ia02104.1.p|PACid:30213356	Pavir.Ia02104.1.p|PACid:30213356	7906	46496	432	432	24	24	54.4	5.24	259027	1	0	0	898.979	1795.94	2	1795.95	-0.0031	1	56.52		30	0.00013	K	DAYVGDEAQSKR	G
4	Pavir.Ia02104.1.p|PACid:30213356	Pavir.Ia02104.1.p|PACid:30213356	7906	46496	432	432	24	24	54.4	5.24	259036	1	0	0	599.655	1795.94	3	1795.95	-0.003	1	20.67	17	30	0.024	K	DAYVGDEAQSKR	G
4	Pavir.Ia02104.1.p|PACid:30213356	Pavir.Ia02104.1.p|PACid:30213356	7906	46496	432	432	24	24	54.4	5.24	259044	1	0	0	898.979	1795.94	2	1795.95	-0.0027	1	58.56		31	8.8e-05	K	DAYVGDEAQSKR	G
4	Pavir.Ia02104.1.p|PACid:30213356	Pavir.Ia02104.1.p|PACid:30213356	7906	46496	432	432	24	24	54.4	5.24	259066	1	0	0	599.655	1795.94	3	1795.95	-0.0025	1	34.97	21	31	0.002	K	DAYVGDEAQSKR	G
4	Pavir.Ia02104.1.p|PACid:30213356	Pavir.Ia02104.1.p|PACid:30213356	7906	46496	432	432	24	24	54.4	5.24	259077	1	0	0	599.655	1795.94	3	1795.95	-0.0023	1	28.88	14	30	0.002	K	DAYVGDEAQSKR	G
4	Pavir.Ia02104.1.p|PACid:30213356	Pavir.Ia02104.1.p|PACid:30213356	7906	46496	432	432	24	24	54.4	5.24	259084	1	0	0	599.656	1795.94	3	1795.95	-0.0021	1	15.3	14	30	0.042	K	DAYVGDEAQSKR	G
4	Pavir.Ia02104.1.p|PACid:30213356	Pavir.Ia02104.1.p|PACid:30213356	7906	46496	432	432	24	24	54.4	5.24	259102	1	0	0	599.656	1795.95	3	1795.95	-0.0017	1	23.11	15	30	0.009	K	DAYVGDEAQSKR	G
4	Pavir.Ia02104.1.p|PACid:30213356	Pavir.Ia02104.1.p|PACid:30213356	7906	46496	432	432	24	24	54.4	5.24	259103	1	0	0	599.656	1795.95	3	1795.95	-0.0017	1	41.2	16	30	0.00017	K	DAYVGDEAQSKR	G
4	Pavir.Ia02104.1.p|PACid:30213356	Pavir.Ia02104.1.p|PACid:30213356	7906	46496	432	432	24	24	54.4	5.24	259104	1	0	0	599.656	1795.95	3	1795.95	-0.0017	1	41.26	16	30	0.00019	K	DAYVGDEAQSKR	G
4	Pavir.Ia02104.1.p|PACid:30213356	Pavir.Ia02104.1.p|PACid:30213356	7906	46496	432	432	24	24	54.4	5.24	259105	1	0	0	599.656	1795.95	3	1795.95	-0.0017	1	39.47	18	30	0.00038	K	DAYVGDEAQSKR	G
4	Pavir.Ia02104.1.p|PACid:30213356	Pavir.Ia02104.1.p|PACid:30213356	7906	46496	432	432	24	24	54.4	5.24	259116	1	0	0	599.656	1795.95	3	1795.95	-0.0016	1	28.34	14	30	0.0022	K	DAYVGDEAQSKR	G
4	Pavir.Ia02104.1.p|PACid:30213356	Pavir.Ia02104.1.p|PACid:30213356	7906	46496	432	432	24	24	54.4	5.24	259128	1	0	0	599.656	1795.95	3	1795.95	-0.0008	1	41.4	19	30	0.00029	K	DAYVGDEAQSKR	G
4	Pavir.Ia02104.1.p|PACid:30213356	Pavir.Ia02104.1.p|PACid:30213356	7906	46496	432	432	24	24	54.4	5.24	259415	1	0	0	599.984	1796.93	3	1796.93	-0.0023	1	30.45	14	30	0.0014	K	DAYVGDEAQSKR	G	Deamidated (NQ)	0.000000002000.0
4	Pavir.Ia02104.1.p|PACid:30213356	Pavir.Ia02104.1.p|PACid:30213356	7906	46496	432	432	24	24	54.4	5.24	280707	1	0	0	620.333	1857.98	3	1857.98	-0.0028	1	17.95	14	30	0.021	R	GYSFTTTAEREIVR	D
4	Pavir.Ia02104.1.p|PACid:30213356	Pavir.Ia02104.1.p|PACid:30213356	7906	46496	432	432	24	24	54.4	5.24	319868	1	0	0	989.025	1976.04	2	1976.04	-0.0053	0	71.15	23	30	8.3e-07	K	SYELPDGQVITIGAER	F
4	Pavir.Ia02104.1.p|PACid:30213356	Pavir.Ia02104.1.p|PACid:30213356	7906	46496	432	432	24	24	54.4	5.24	319872	1	0	0	989.026	1976.04	2	1976.04	-0.005	0	18.52	14	30	0.018	K	SYELPDGQVITIGAER	F
4	Pavir.Ia02104.1.p|PACid:30213356	Pavir.Ia02104.1.p|PACid:30213356	7906	46496	432	432	24	24	54.4	5.24	319873	1	0	0	659.686	1976.04	3	1976.04	-0.0049	0	36.58	20	30	0.0012	K	SYELPDGQVITIGAER	F
4	Pavir.Ia02104.1.p|PACid:30213356	Pavir.Ia02104.1.p|PACid:30213356	7906	46496	432	432	24	24	54.4	5.24	319882	1	0	0	989.026	1976.04	2	1976.04	-0.0047	0	95.74	18	30	1.1e-09	K	SYELPDGQVITIGAER	F
4	Pavir.Ia02104.1.p|PACid:30213356	Pavir.Ia02104.1.p|PACid:30213356	7906	46496	432	432	24	24	54.4	5.24	319885	1	0	0	989.026	1976.04	2	1976.04	-0.0044	0	33.42	15	30	0.00073	K	SYELPDGQVITIGAER	F
4	Pavir.Ia02104.1.p|PACid:30213356	Pavir.Ia02104.1.p|PACid:30213356	7906	46496	432	432	24	24	54.4	5.24	319886	1	0	0	989.026	1976.04	2	1976.04	-0.0044	0	89.2	18	30	4.3e-09	K	SYELPDGQVITIGAER	F
4	Pavir.Ia02104.1.p|PACid:30213356	Pavir.Ia02104.1.p|PACid:30213356	7906	46496	432	432	24	24	54.4	5.24	319887	1	0	0	659.686	1976.04	3	1976.04	-0.0044	0	14.07	13	30	0.048	K	SYELPDGQVITIGAER	F
4	Pavir.Ia02104.1.p|PACid:30213356	Pavir.Ia02104.1.p|PACid:30213356	7906	46496	432	432	24	24	54.4	5.24	319888	1	0	0	989.026	1976.04	2	1976.04	-0.0042	0	72.67	17	30	1.5e-07	K	SYELPDGQVITIGAER	F
4	Pavir.Ia02104.1.p|PACid:30213356	Pavir.Ia02104.1.p|PACid:30213356	7906	46496	432	432	24	24	54.4	5.24	319889	1	0	0	989.026	1976.04	2	1976.04	-0.0042	0	73.33	17	30	1.3e-07	K	SYELPDGQVITIGAER	F
4	Pavir.Ia02104.1.p|PACid:30213356	Pavir.Ia02104.1.p|PACid:30213356	7906	46496	432	432	24	24	54.4	5.24	319891	1	0	0	989.026	1976.04	2	1976.04	-0.0041	0	46.45	16	30	5.2e-05	K	SYELPDGQVITIGAER	F
4	Pavir.Ia02104.1.p|PACid:30213356	Pavir.Ia02104.1.p|PACid:30213356	7906	46496	432	432	24	24	54.4	5.24	319899	1	0	0	989.026	1976.04	2	1976.04	-0.0039	0	17.51	14	30	0.023	K	SYELPDGQVITIGAER	F
4	Pavir.Ia02104.1.p|PACid:30213356	Pavir.Ia02104.1.p|PACid:30213356	7906	46496	432	432	24	24	54.4	5.24	319902	1	0	0	989.026	1976.04	2	1976.04	-0.0038	0	88.62	18	30	4.9e-09	K	SYELPDGQVITIGAER	F
4	Pavir.Ia02104.1.p|PACid:30213356	Pavir.Ia02104.1.p|PACid:30213356	7906	46496	432	432	24	24	54.4	5.24	319903	1	0	0	989.026	1976.04	2	1976.04	-0.0038	0	95.07	18	30	1.2e-09	K	SYELPDGQVITIGAER	F
4	Pavir.Ia02104.1.p|PACid:30213356	Pavir.Ia02104.1.p|PACid:30213356	7906	46496	432	432	24	24	54.4	5.24	319904	1	0	0	989.026	1976.04	2	1976.04	-0.0037	0	52.97	16	30	1.1e-05	K	SYELPDGQVITIGAER	F
4	Pavir.Ia02104.1.p|PACid:30213356	Pavir.Ia02104.1.p|PACid:30213356	7906	46496	432	432	24	24	54.4	5.24	319906	1	0	0	989.026	1976.04	2	1976.04	-0.0037	0	58.15	16	30	3.5e-06	K	SYELPDGQVITIGAER	F
4	Pavir.Ia02104.1.p|PACid:30213356	Pavir.Ia02104.1.p|PACid:30213356	7906	46496	432	432	24	24	54.4	5.24	319908	1	0	0	989.026	1976.04	2	1976.04	-0.0037	0	47.87	15	30	3.2e-05	K	SYELPDGQVITIGAER	F
4	Pavir.Ia02104.1.p|PACid:30213356	Pavir.Ia02104.1.p|PACid:30213356	7906	46496	432	432	24	24	54.4	5.24	319911	1	0	0	659.687	1976.04	3	1976.04	-0.0036	0	39.81	15	30	0.00018	K	SYELPDGQVITIGAER	F
4	Pavir.Ia02104.1.p|PACid:30213356	Pavir.Ia02104.1.p|PACid:30213356	7906	46496	432	432	24	24	54.4	5.24	319912	1	0	0	659.687	1976.04	3	1976.04	-0.0036	0	32.15	15	30	0.00097	K	SYELPDGQVITIGAER	F
4	Pavir.Ia02104.1.p|PACid:30213356	Pavir.Ia02104.1.p|PACid:30213356	7906	46496	432	432	24	24	54.4	5.24	319914	1	0	0	989.026	1976.04	2	1976.04	-0.0036	0	36.49	15	30	0.00038	K	SYELPDGQVITIGAER	F
4	Pavir.Ia02104.1.p|PACid:30213356	Pavir.Ia02104.1.p|PACid:30213356	7906	46496	432	432	24	24	54.4	5.24	319918	1	0	0	989.026	1976.04	2	1976.04	-0.0034	0	88.62	18	30	5.1e-09	K	SYELPDGQVITIGAER	F
4	Pavir.Ia02104.1.p|PACid:30213356	Pavir.Ia02104.1.p|PACid:30213356	7906	46496	432	432	24	24	54.4	5.24	319921	1	0	0	989.027	1976.04	2	1976.04	-0.0033	0	21.45	14	30	0.0097	K	SYELPDGQVITIGAER	F
4	Pavir.Ia02104.1.p|PACid:30213356	Pavir.Ia02104.1.p|PACid:30213356	7906	46496	432	432	24	24	54.4	5.24	319922	1	0	0	989.027	1976.04	2	1976.04	-0.0033	0	55.87	18	30	9.4e-06	K	SYELPDGQVITIGAER	F
4	Pavir.Ia02104.1.p|PACid:30213356	Pavir.Ia02104.1.p|PACid:30213356	7906	46496	432	432	24	24	54.4	5.24	319923	1	0	0	989.027	1976.04	2	1976.04	-0.0033	0	75.63	19	30	1.1e-07	K	SYELPDGQVITIGAER	F
4	Pavir.Ia02104.1.p|PACid:30213356	Pavir.Ia02104.1.p|PACid:30213356	7906	46496	432	432	24	24	54.4	5.24	319929	1	0	0	989.027	1976.04	2	1976.04	-0.0032	0	34.12	15	30	0.00072	K	SYELPDGQVITIGAER	F
4	Pavir.Ia02104.1.p|PACid:30213356	Pavir.Ia02104.1.p|PACid:30213356	7906	46496	432	432	24	24	54.4	5.24	319930	1	0	0	989.027	1976.04	2	1976.04	-0.0032	0	21.65	14	30	0.0093	K	SYELPDGQVITIGAER	F
4	Pavir.Ia02104.1.p|PACid:30213356	Pavir.Ia02104.1.p|PACid:30213356	7906	46496	432	432	24	24	54.4	5.24	319931	1	0	0	989.027	1976.04	2	1976.04	-0.0032	0	27.75	15	30	0.0028	K	SYELPDGQVITIGAER	F
4	Pavir.Ia02104.1.p|PACid:30213356	Pavir.Ia02104.1.p|PACid:30213356	7906	46496	432	432	24	24	54.4	5.24	319932	1	0	0	659.687	1976.04	3	1976.04	-0.0031	0	35.22	15	30	0.00051	K	SYELPDGQVITIGAER	F
4	Pavir.Ia02104.1.p|PACid:30213356	Pavir.Ia02104.1.p|PACid:30213356	7906	46496	432	432	24	24	54.4	5.24	319933	1	0	0	659.687	1976.04	3	1976.04	-0.0031	0	48.92	16	30	2.6e-05	K	SYELPDGQVITIGAER	F
4	Pavir.Ia02104.1.p|PACid:30213356	Pavir.Ia02104.1.p|PACid:30213356	7906	46496	432	432	24	24	54.4	5.24	319934	1	0	0	659.687	1976.04	3	1976.04	-0.0031	0	29.35	14	30	0.0018	K	SYELPDGQVITIGAER	F
4	Pavir.Ia02104.1.p|PACid:30213356	Pavir.Ia02104.1.p|PACid:30213356	7906	46496	432	432	24	24	54.4	5.24	319935	1	0	0	659.687	1976.04	3	1976.04	-0.0031	0	61.46	20	30	3.7e-06	K	SYELPDGQVITIGAER	F
4	Pavir.Ia02104.1.p|PACid:30213356	Pavir.Ia02104.1.p|PACid:30213356	7906	46496	432	432	24	24	54.4	5.24	319940	1	0	0	989.027	1976.04	2	1976.04	-0.003	0	41.31	16	30	0.00017	K	SYELPDGQVITIGAER	F
4	Pavir.Ia02104.1.p|PACid:30213356	Pavir.Ia02104.1.p|PACid:30213356	7906	46496	432	432	24	24	54.4	5.24	319942	1	0	0	659.687	1976.04	3	1976.04	-0.0029	0	36.3	15	30	0.00046	K	SYELPDGQVITIGAER	F
4	Pavir.Ia02104.1.p|PACid:30213356	Pavir.Ia02104.1.p|PACid:30213356	7906	46496	432	432	24	24	54.4	5.24	319943	1	0	0	659.687	1976.04	3	1976.04	-0.0029	0	54.2	19	30	1.5e-05	K	SYELPDGQVITIGAER	F
4	Pavir.Ia02104.1.p|PACid:30213356	Pavir.Ia02104.1.p|PACid:30213356	7906	46496	432	432	24	24	54.4	5.24	319945	1	0	0	659.687	1976.04	3	1976.04	-0.0027	0	58.99	17	30	3.3e-06	K	SYELPDGQVITIGAER	F
4	Pavir.Ia02104.1.p|PACid:30213356	Pavir.Ia02104.1.p|PACid:30213356	7906	46496	432	432	24	24	54.4	5.24	319946	1	0	0	989.027	1976.04	2	1976.04	-0.0027	0	28.54	14	30	0.0021	K	SYELPDGQVITIGAER	F
4	Pavir.Ia02104.1.p|PACid:30213356	Pavir.Ia02104.1.p|PACid:30213356	7906	46496	432	432	24	24	54.4	5.24	319947	1	0	0	989.027	1976.04	2	1976.04	-0.0027	0	106.33	20	30	1.2e-10	K	SYELPDGQVITIGAER	F
4	Pavir.Ia02104.1.p|PACid:30213356	Pavir.Ia02104.1.p|PACid:30213356	7906	46496	432	432	24	24	54.4	5.24	319948	1	0	0	989.027	1976.04	2	1976.04	-0.0027	0	77.91	17	30	5e-08	K	SYELPDGQVITIGAER	F
4	Pavir.Ia02104.1.p|PACid:30213356	Pavir.Ia02104.1.p|PACid:30213356	7906	46496	432	432	24	24	54.4	5.24	319950	1	0	0	659.687	1976.04	3	1976.04	-0.0025	0	53.25	24	30	6.3e-05	K	SYELPDGQVITIGAER	F
4	Pavir.Ia02104.1.p|PACid:30213356	Pavir.Ia02104.1.p|PACid:30213356	7906	46496	432	432	24	24	54.4	5.24	319951	1	0	0	659.687	1976.04	3	1976.04	-0.0025	0	49.1	16	30	2.7e-05	K	SYELPDGQVITIGAER	F
4	Pavir.Ia02104.1.p|PACid:30213356	Pavir.Ia02104.1.p|PACid:30213356	7906	46496	432	432	24	24	54.4	5.24	319954	1	0	0	989.027	1976.04	2	1976.04	-0.0025	0	35.76	15	30	0.00047	K	SYELPDGQVITIGAER	F
4	Pavir.Ia02104.1.p|PACid:30213356	Pavir.Ia02104.1.p|PACid:30213356	7906	46496	432	432	24	24	54.4	5.24	319956	1	0	0	659.687	1976.04	3	1976.04	-0.0024	0	50.92	19	30	3.4e-05	K	SYELPDGQVITIGAER	F
4	Pavir.Ia02104.1.p|PACid:30213356	Pavir.Ia02104.1.p|PACid:30213356	7906	46496	432	432	24	24	54.4	5.24	319957	1	0	0	659.687	1976.04	3	1976.04	-0.0024	0	70.5	17	30	2.6e-07	K	SYELPDGQVITIGAER	F
4	Pavir.Ia02104.1.p|PACid:30213356	Pavir.Ia02104.1.p|PACid:30213356	7906	46496	432	432	24	24	54.4	5.24	319958	1	0	0	659.687	1976.04	3	1976.04	-0.0024	0	62.1	23	30	7.5e-06	K	SYELPDGQVITIGAER	F
4	Pavir.Ia02104.1.p|PACid:30213356	Pavir.Ia02104.1.p|PACid:30213356	7906	46496	432	432	24	24	54.4	5.24	319970	1	0	0	659.687	1976.04	3	1976.04	-0.0018	0	69.12	20	30	6.5e-07	K	SYELPDGQVITIGAER	F
4	Pavir.Ia02104.1.p|PACid:30213356	Pavir.Ia02104.1.p|PACid:30213356	7906	46496	432	432	24	24	54.4	5.24	319971	1	0	0	989.027	1976.04	2	1976.04	-0.0017	0	40.29	15	30	0.00017	K	SYELPDGQVITIGAER	F
4	Pavir.Ia02104.1.p|PACid:30213356	Pavir.Ia02104.1.p|PACid:30213356	7906	46496	432	432	24	24	54.4	5.24	319977	1	0	0	659.687	1976.04	3	1976.04	-0.0013	0	65.35	24	30	4.1e-06	K	SYELPDGQVITIGAER	F
4	Pavir.Ia02104.1.p|PACid:30213356	Pavir.Ia02104.1.p|PACid:30213356	7906	46496	432	432	24	24	54.4	5.24	319981	1	0	0	989.028	1976.04	2	1976.04	-0.0011	0	36.94	15	30	0.00034	K	SYELPDGQVITIGAER	F
4	Pavir.Ia02104.1.p|PACid:30213356	Pavir.Ia02104.1.p|PACid:30213356	7906	46496	432	432	24	24	54.4	5.24	319983	1	0	0	989.028	1976.04	2	1976.04	-0.0004	0	19.63	14	30	0.014	K	SYELPDGQVITIGAER	F
4	Pavir.Ia02104.1.p|PACid:30213356	Pavir.Ia02104.1.p|PACid:30213356	7906	46496	432	432	24	24	54.4	5.24	319984	1	0	0	659.688	1976.04	3	1976.04	-0.0004	0	35.21	17	30	0.00084	K	SYELPDGQVITIGAER	F
4	Pavir.Ia02104.1.p|PACid:30213356	Pavir.Ia02104.1.p|PACid:30213356	7906	46496	432	432	24	24	54.4	5.24	319990	1	0	0	659.689	1976.04	3	1976.04	0.0022	0	19.63	14	30	0.014	K	SYELPDGQVITIGAER	F
4	Pavir.Ia02104.1.p|PACid:30213356	Pavir.Ia02104.1.p|PACid:30213356	7906	46496	432	432	24	24	54.4	5.24	320314	1	0	0	660.014	1977.02	3	1977.03	-0.0069	0	28.62	22	30	0.011	K	SYELPDGQVITIGAER	F	Deamidated (NQ)	0.0000000200000000.0
4	Pavir.Ia02104.1.p|PACid:30213356	Pavir.Ia02104.1.p|PACid:30213356	7906	46496	432	432	24	24	54.4	5.24	320317	1	0	0	660.014	1977.02	3	1977.03	-0.0056	0	14.66	14	30	0.043	K	SYELPDGQVITIGAER	F	Deamidated (NQ)	0.0000000200000000.0
4	Pavir.Ia02104.1.p|PACid:30213356	Pavir.Ia02104.1.p|PACid:30213356	7906	46496	432	432	24	24	54.4	5.24	320318	1	0	0	660.014	1977.02	3	1977.03	-0.0051	0	31.14	14	30	0.0012	K	SYELPDGQVITIGAER	F	Deamidated (NQ)	0.0000000200000000.0
4	Pavir.Ia02104.1.p|PACid:30213356	Pavir.Ia02104.1.p|PACid:30213356	7906	46496	432	432	24	24	54.4	5.24	320322	1	0	0	989.519	1977.02	2	1977.03	-0.0032	0	19.44	14	30	0.018	K	SYELPDGQVITIGAER	F	Deamidated (NQ)	0.0000000200000000.0
4	Pavir.Ia02104.1.p|PACid:30213356	Pavir.Ia02104.1.p|PACid:30213356	7906	46496	432	432	24	24	54.4	5.24	320323	1	0	0	989.519	1977.02	2	1977.03	-0.0031	0	18.62	14	30	0.018	K	SYELPDGQVITIGAER	F	Deamidated (NQ)	0.0000000200000000.0
4	Pavir.Ia02104.1.p|PACid:30213356	Pavir.Ia02104.1.p|PACid:30213356	7906	46496	432	432	24	24	54.4	5.24	320353	1	0	0	660.021	1977.04	3	1977.03	0.015	0	21.06	14	30	0.012	K	SYELPDGQVITIGAER	F	Deamidated (NQ)	0.0000000200000000.0
4	Pavir.Ia02104.1.p|PACid:30213356	Pavir.Ia02104.1.p|PACid:30213356	7906	46496	432	432	24	24	54.4	5.24	320354	1	0	0	660.021	1977.04	3	1977.03	0.0152	0	24.97	14	30	0.005	K	SYELPDGQVITIGAER	F	Deamidated (NQ)	0.0000000200000000.0
4	Pavir.Ia02104.1.p|PACid:30213356	Pavir.Ia02104.1.p|PACid:30213356	7906	46496	432	432	24	24	54.4	5.24	357756	1	1	1	526.287	2101.12	4	2101.12	-0.0038	1	35.34	16	31	0.00069	R	EEYEESGPAIVHRK	C
4	Pavir.Ia02104.1.p|PACid:30213356	Pavir.Ia02104.1.p|PACid:30213356	7906	46496	432	432	24	24	54.4	5.24	357757	1	1	1	526.287	2101.12	4	2101.12	-0.0026	1	29.16	16	31	0.0025	R	EEYEESGPAIVHRK	C
4	Pavir.Ia02104.1.p|PACid:30213356	Pavir.Ia02104.1.p|PACid:30213356	7906	46496	432	432	24	24	54.4	5.24	357760	1	1	1	526.287	2101.12	4	2101.12	-0.0011	1	25.39	15	31	0.005	R	EEYEESGPAIVHRK	C
4	Pavir.Ia02104.1.p|PACid:30213356	Pavir.Ia02104.1.p|PACid:30213356	7906	46496	432	432	24	24	54.4	5.24	380986	1	0	0	733.088	2196.24	3	2196.25	-0.0041	1	37.26	21	31	0.0014	R	MSKEITALAPSSMK	I	Oxidation (M)	0.10000000000000.0
4	Pavir.Ia02104.1.p|PACid:30213356	Pavir.Ia02104.1.p|PACid:30213356	7906	46496	432	432	24	24	54.4	5.24	380988	1	0	0	733.088	2196.24	3	2196.25	-0.0035	1	16.17	14	31	0.03	R	MSKEITALAPSSMK	I	Oxidation (M)	0.10000000000000.0
4	Pavir.Ia02104.1.p|PACid:30213356	Pavir.Ia02104.1.p|PACid:30213356	7906	46496	432	432	24	24	54.4	5.24	380989	1	0	0	733.088	2196.24	3	2196.25	-0.0033	1	20.01	14	31	0.013	R	MSKEITALAPSSMK	I	Oxidation (M)	0.00000000000010.0
4	Pavir.Ia02104.1.p|PACid:30213356	Pavir.Ia02104.1.p|PACid:30213356	7906	46496	432	432	24	24	54.4	5.24	380991	1	0	0	733.088	2196.24	3	2196.25	-0.0029	1	24.51	21	31	0.028	R	MSKEITALAPSSMK	I	Oxidation (M)	0.10000000000000.0
4	Pavir.Ia02104.1.p|PACid:30213356	Pavir.Ia02104.1.p|PACid:30213356	7906	46496	432	432	24	24	54.4	5.24	380993	1	0	0	550.068	2196.24	4	2196.25	-0.0018	1	21.44	14	30	0.0097	R	MSKEITALAPSSMK	I	Oxidation (M)	0.00000000000010.0
4	Pavir.Ia02104.1.p|PACid:30213356	Pavir.Ia02104.1.p|PACid:30213356	7906	46496	432	432	24	24	54.4	5.24	384564	1	0	0	738.419	2212.24	3	2212.24	-0.0052	1	16.29	14	31	0.03	R	MSKEITALAPSSMK	I	2 Oxidation (M)	0.10000000000010.0
4	Pavir.Ia02104.1.p|PACid:30213356	Pavir.Ia02104.1.p|PACid:30213356	7906	46496	432	432	24	24	54.4	5.24	384567	1	0	0	554.067	2212.24	4	2212.24	-0.0043	1	24.87	23	30	0.039	R	MSKEITALAPSSMK	I	2 Oxidation (M)	0.10000000000010.0
4	Pavir.Ia02104.1.p|PACid:30213356	Pavir.Ia02104.1.p|PACid:30213356	7906	46496	432	432	24	24	54.4	5.24	384568	1	0	0	738.42	2212.24	3	2212.24	-0.0041	1	18.41	15	30	0.028	R	MSKEITALAPSSMK	I	2 Oxidation (M)	0.10000000000010.0
4	Pavir.Ia02104.1.p|PACid:30213356	Pavir.Ia02104.1.p|PACid:30213356	7906	46496	432	432	24	24	54.4	5.24	384570	1	0	0	738.42	2212.24	3	2212.24	-0.0038	1	29.86	19	30	0.0042	R	MSKEITALAPSSMK	I	2 Oxidation (M)	0.10000000000010.0
4	Pavir.Ia02104.1.p|PACid:30213356	Pavir.Ia02104.1.p|PACid:30213356	7906	46496	432	432	24	24	54.4	5.24	384571	1	0	0	738.42	2212.24	3	2212.24	-0.0036	1	18.17	14	30	0.02	R	MSKEITALAPSSMK	I	2 Oxidation (M)	0.10000000000010.0
4	Pavir.Ia02104.1.p|PACid:30213356	Pavir.Ia02104.1.p|PACid:30213356	7906	46496	432	432	24	24	54.4	5.24	384573	1	0	0	738.42	2212.24	3	2212.24	-0.0027	1	20.52	14	30	0.012	R	MSKEITALAPSSMK	I	2 Oxidation (M)	0.10000000000010.0
4	Pavir.Ia02104.1.p|PACid:30213356	Pavir.Ia02104.1.p|PACid:30213356	7906	46496	432	432	24	24	54.4	5.24	406414	1	0	0	772.089	2313.25	3	2313.25	-0.0052	0	34.47	15	31	0.00062	K	LAYVALDYEQELETAK	S
4	Pavir.Ia02104.1.p|PACid:30213356	Pavir.Ia02104.1.p|PACid:30213356	7906	46496	432	432	24	24	54.4	5.24	420632	1	0	0	797.739	2390.19	3	2390.2	-0.0039	0	75.1	17	30	9.1e-08	K	YPIEHGIVSNWDDMEK	I
4	Pavir.Ia02104.1.p|PACid:30213356	Pavir.Ia02104.1.p|PACid:30213356	7906	46496	432	432	24	24	54.4	5.24	420633	1	0	0	797.74	2390.2	3	2390.2	-0.0012	0	68.87	17	30	3.5e-07	K	YPIEHGIVSNWDDMEK	I
4	Pavir.Ia02104.1.p|PACid:30213356	Pavir.Ia02104.1.p|PACid:30213356	7906	46496	432	432	24	24	54.4	5.24	423581	1	0	0	803.069	2406.19	3	2406.19	-0.0068	0	25.49	14	29	0.0041	K	YPIEHGIVSNWDDMEK	I	Oxidation (M)	0.0000000000000100.0
4	Pavir.Ia02104.1.p|PACid:30213356	Pavir.Ia02104.1.p|PACid:30213356	7906	46496	432	432	24	24	54.4	5.24	423582	1	0	0	803.07	2406.19	3	2406.19	-0.0044	0	39.54	15	29	0.0002	K	YPIEHGIVSNWDDMEK	I	Oxidation (M)	0.0000000000000100.0
4	Pavir.Ia02104.1.p|PACid:30213356	Pavir.Ia02104.1.p|PACid:30213356	7906	46496	432	432	24	24	54.4	5.24	423584	1	0	0	602.555	2406.19	4	2406.19	-0.0035	0	46.09	15	29	4.8e-05	K	YPIEHGIVSNWDDMEK	I	Oxidation (M)	0.0000000000000100.0
4	Pavir.Ia02104.1.p|PACid:30213356	Pavir.Ia02104.1.p|PACid:30213356	7906	46496	432	432	24	24	54.4	5.24	423585	1	0	0	803.071	2406.19	3	2406.19	-0.0033	0	38.01	15	29	0.00027	K	YPIEHGIVSNWDDMEK	I	Oxidation (M)	0.0000000000000100.0
4	Pavir.Ia02104.1.p|PACid:30213356	Pavir.Ia02104.1.p|PACid:30213356	7906	46496	432	432	24	24	54.4	5.24	424658	1	0	0	1206.69	2411.38	2	2411.38	-0.0079	0	56.68	18	30	6.9e-06	R	VAPEEHPVLLTEAPLNPK	A
4	Pavir.Ia02104.1.p|PACid:30213356	Pavir.Ia02104.1.p|PACid:30213356	7906	46496	432	432	24	24	54.4	5.24	424662	1	0	0	804.799	2411.38	3	2411.38	-0.007	0	60.94	16	30	1.9e-06	R	VAPEEHPVLLTEAPLNPK	A
4	Pavir.Ia02104.1.p|PACid:30213356	Pavir.Ia02104.1.p|PACid:30213356	7906	46496	432	432	24	24	54.4	5.24	424666	1	0	0	804.799	2411.38	3	2411.38	-0.0065	0	21.06	15	30	0.013	R	VAPEEHPVLLTEAPLNPK	A
4	Pavir.Ia02104.1.p|PACid:30213356	Pavir.Ia02104.1.p|PACid:30213356	7906	46496	432	432	24	24	54.4	5.24	424672	1	0	0	804.8	2411.38	3	2411.38	-0.0058	0	21.84	17	30	0.02	R	VAPEEHPVLLTEAPLNPK	A
4	Pavir.Ia02104.1.p|PACid:30213356	Pavir.Ia02104.1.p|PACid:30213356	7906	46496	432	432	24	24	54.4	5.24	424674	1	0	0	804.8	2411.38	3	2411.38	-0.0056	0	48.73	16	30	3.3e-05	R	VAPEEHPVLLTEAPLNPK	A
4	Pavir.Ia02104.1.p|PACid:30213356	Pavir.Ia02104.1.p|PACid:30213356	7906	46496	432	432	24	24	54.4	5.24	424682	1	0	0	804.8	2411.38	3	2411.38	-0.0052	0	25.21	14	30	0.0043	R	VAPEEHPVLLTEAPLNPK	A
4	Pavir.Ia02104.1.p|PACid:30213356	Pavir.Ia02104.1.p|PACid:30213356	7906	46496	432	432	24	24	54.4	5.24	424683	1	0	0	804.8	2411.38	3	2411.38	-0.0052	0	44.24	15	30	7.1e-05	R	VAPEEHPVLLTEAPLNPK	A
4	Pavir.Ia02104.1.p|PACid:30213356	Pavir.Ia02104.1.p|PACid:30213356	7906	46496	432	432	24	24	54.4	5.24	424689	1	0	0	804.8	2411.38	3	2411.38	-0.005	0	64.59	17	30	8.8e-07	R	VAPEEHPVLLTEAPLNPK	A
4	Pavir.Ia02104.1.p|PACid:30213356	Pavir.Ia02104.1.p|PACid:30213356	7906	46496	432	432	24	24	54.4	5.24	424692	1	0	0	804.8	2411.38	3	2411.38	-0.0048	0	46.01	16	30	5.1e-05	R	VAPEEHPVLLTEAPLNPK	A
4	Pavir.Ia02104.1.p|PACid:30213356	Pavir.Ia02104.1.p|PACid:30213356	7906	46496	432	432	24	24	54.4	5.24	424693	1	0	0	804.8	2411.38	3	2411.38	-0.0048	0	58.65	16	30	3.2e-06	R	VAPEEHPVLLTEAPLNPK	A
4	Pavir.Ia02104.1.p|PACid:30213356	Pavir.Ia02104.1.p|PACid:30213356	7906	46496	432	432	24	24	54.4	5.24	424694	1	0	0	804.8	2411.38	3	2411.38	-0.0046	0	56.13	16	30	5.5e-06	R	VAPEEHPVLLTEAPLNPK	A
4	Pavir.Ia02104.1.p|PACid:30213356	Pavir.Ia02104.1.p|PACid:30213356	7906	46496	432	432	24	24	54.4	5.24	424695	1	0	0	804.8	2411.38	3	2411.38	-0.0046	0	45.34	15	30	5.6e-05	R	VAPEEHPVLLTEAPLNPK	A
4	Pavir.Ia02104.1.p|PACid:30213356	Pavir.Ia02104.1.p|PACid:30213356	7906	46496	432	432	24	24	54.4	5.24	424697	1	0	0	603.852	2411.38	4	2411.38	-0.0046	0	23.15	18	30	0.017	R	VAPEEHPVLLTEAPLNPK	A
4	Pavir.Ia02104.1.p|PACid:30213356	Pavir.Ia02104.1.p|PACid:30213356	7906	46496	432	432	24	24	54.4	5.24	424698	1	0	0	603.852	2411.38	4	2411.38	-0.0046	0	32.41	15	30	0.0011	R	VAPEEHPVLLTEAPLNPK	A
4	Pavir.Ia02104.1.p|PACid:30213356	Pavir.Ia02104.1.p|PACid:30213356	7906	46496	432	432	24	24	54.4	5.24	424699	1	0	0	603.852	2411.38	4	2411.38	-0.0046	0	28.91	20	30	0.0073	R	VAPEEHPVLLTEAPLNPK	A
4	Pavir.Ia02104.1.p|PACid:30213356	Pavir.Ia02104.1.p|PACid:30213356	7906	46496	432	432	24	24	54.4	5.24	424702	1	0	0	804.8	2411.38	3	2411.38	-0.0045	0	32.39	17	30	0.0017	R	VAPEEHPVLLTEAPLNPK	A
4	Pavir.Ia02104.1.p|PACid:30213356	Pavir.Ia02104.1.p|PACid:30213356	7906	46496	432	432	24	24	54.4	5.24	424703	1	0	0	804.8	2411.38	3	2411.38	-0.0045	0	48.08	18	30	5e-05	R	VAPEEHPVLLTEAPLNPK	A
4	Pavir.Ia02104.1.p|PACid:30213356	Pavir.Ia02104.1.p|PACid:30213356	7906	46496	432	432	24	24	54.4	5.24	424704	1	0	0	804.8	2411.38	3	2411.38	-0.0045	0	37.49	17	30	0.00054	R	VAPEEHPVLLTEAPLNPK	A
4	Pavir.Ia02104.1.p|PACid:30213356	Pavir.Ia02104.1.p|PACid:30213356	7906	46496	432	432	24	24	54.4	5.24	424705	1	0	0	804.8	2411.38	3	2411.38	-0.0045	0	38.46	15	30	0.00025	R	VAPEEHPVLLTEAPLNPK	A
4	Pavir.Ia02104.1.p|PACid:30213356	Pavir.Ia02104.1.p|PACid:30213356	7906	46496	432	432	24	24	54.4	5.24	424706	1	0	0	1206.7	2411.38	2	2411.38	-0.0045	0	23.27	15	30	0.0092	R	VAPEEHPVLLTEAPLNPK	A
4	Pavir.Ia02104.1.p|PACid:30213356	Pavir.Ia02104.1.p|PACid:30213356	7906	46496	432	432	24	24	54.4	5.24	424711	1	0	0	804.8	2411.38	3	2411.38	-0.0043	0	50.04	16	30	2e-05	R	VAPEEHPVLLTEAPLNPK	A
4	Pavir.Ia02104.1.p|PACid:30213356	Pavir.Ia02104.1.p|PACid:30213356	7906	46496	432	432	24	24	54.4	5.24	424712	1	0	0	804.8	2411.38	3	2411.38	-0.0043	0	33.95	15	30	0.00065	R	VAPEEHPVLLTEAPLNPK	A
4	Pavir.Ia02104.1.p|PACid:30213356	Pavir.Ia02104.1.p|PACid:30213356	7906	46496	432	432	24	24	54.4	5.24	424713	1	0	0	804.8	2411.38	3	2411.38	-0.0043	0	51.85	16	30	1.4e-05	R	VAPEEHPVLLTEAPLNPK	A
4	Pavir.Ia02104.1.p|PACid:30213356	Pavir.Ia02104.1.p|PACid:30213356	7906	46496	432	432	24	24	54.4	5.24	424715	1	0	0	804.8	2411.38	3	2411.38	-0.0041	0	57.08	16	30	4.4e-06	R	VAPEEHPVLLTEAPLNPK	A
4	Pavir.Ia02104.1.p|PACid:30213356	Pavir.Ia02104.1.p|PACid:30213356	7906	46496	432	432	24	24	54.4	5.24	424716	1	0	0	804.8	2411.38	3	2411.38	-0.0041	0	37.43	15	30	0.00031	R	VAPEEHPVLLTEAPLNPK	A
4	Pavir.Ia02104.1.p|PACid:30213356	Pavir.Ia02104.1.p|PACid:30213356	7906	46496	432	432	24	24	54.4	5.24	424717	1	0	0	804.8	2411.38	3	2411.38	-0.0041	0	45.2	15	30	5.8e-05	R	VAPEEHPVLLTEAPLNPK	A
4	Pavir.Ia02104.1.p|PACid:30213356	Pavir.Ia02104.1.p|PACid:30213356	7906	46496	432	432	24	24	54.4	5.24	424718	1	0	0	483.283	2411.38	5	2411.38	-0.0041	0	21.8	19	30	0.027	R	VAPEEHPVLLTEAPLNPK	A
4	Pavir.Ia02104.1.p|PACid:30213356	Pavir.Ia02104.1.p|PACid:30213356	7906	46496	432	432	24	24	54.4	5.24	424721	1	0	0	804.8	2411.38	3	2411.38	-0.0039	0	43.97	15	30	7.5e-05	R	VAPEEHPVLLTEAPLNPK	A
4	Pavir.Ia02104.1.p|PACid:30213356	Pavir.Ia02104.1.p|PACid:30213356	7906	46496	432	432	24	24	54.4	5.24	424722	1	0	0	603.852	2411.38	4	2411.38	-0.0039	0	25.6	20	30	0.016	R	VAPEEHPVLLTEAPLNPK	A
4	Pavir.Ia02104.1.p|PACid:30213356	Pavir.Ia02104.1.p|PACid:30213356	7906	46496	432	432	24	24	54.4	5.24	424724	1	0	0	804.8	2411.38	3	2411.38	-0.0037	0	65.4	17	30	7.4e-07	R	VAPEEHPVLLTEAPLNPK	A
4	Pavir.Ia02104.1.p|PACid:30213356	Pavir.Ia02104.1.p|PACid:30213356	7906	46496	432	432	24	24	54.4	5.24	424725	1	0	0	804.8	2411.38	3	2411.38	-0.0037	0	69.28	17	30	3.2e-07	R	VAPEEHPVLLTEAPLNPK	A
4	Pavir.Ia02104.1.p|PACid:30213356	Pavir.Ia02104.1.p|PACid:30213356	7906	46496	432	432	24	24	54.4	5.24	424728	1	0	0	603.852	2411.38	4	2411.38	-0.0036	0	34.33	21	30	0.0027	R	VAPEEHPVLLTEAPLNPK	A
4	Pavir.Ia02104.1.p|PACid:30213356	Pavir.Ia02104.1.p|PACid:30213356	7906	46496	432	432	24	24	54.4	5.24	424730	1	0	0	603.852	2411.38	4	2411.38	-0.0036	0	42.3	22	30	0.00053	R	VAPEEHPVLLTEAPLNPK	A
4	Pavir.Ia02104.1.p|PACid:30213356	Pavir.Ia02104.1.p|PACid:30213356	7906	46496	432	432	24	24	54.4	5.24	424731	1	0	0	603.852	2411.38	4	2411.38	-0.0036	0	29.13	19	30	0.0051	R	VAPEEHPVLLTEAPLNPK	A
4	Pavir.Ia02104.1.p|PACid:30213356	Pavir.Ia02104.1.p|PACid:30213356	7906	46496	432	432	24	24	54.4	5.24	424733	1	0	0	804.8	2411.38	3	2411.38	-0.0036	0	22.89	14	30	0.0071	R	VAPEEHPVLLTEAPLNPK	A
4	Pavir.Ia02104.1.p|PACid:30213356	Pavir.Ia02104.1.p|PACid:30213356	7906	46496	432	432	24	24	54.4	5.24	424734	1	0	0	804.8	2411.38	3	2411.38	-0.0036	0	30.03	16	30	0.0021	R	VAPEEHPVLLTEAPLNPK	A
4	Pavir.Ia02104.1.p|PACid:30213356	Pavir.Ia02104.1.p|PACid:30213356	7906	46496	432	432	24	24	54.4	5.24	424735	1	0	0	804.8	2411.38	3	2411.38	-0.0036	0	44.96	18	30	0.00013	R	VAPEEHPVLLTEAPLNPK	A
4	Pavir.Ia02104.1.p|PACid:30213356	Pavir.Ia02104.1.p|PACid:30213356	7906	46496	432	432	24	24	54.4	5.24	424737	1	0	0	603.852	2411.38	4	2411.38	-0.0034	0	28.65	18	30	0.0048	R	VAPEEHPVLLTEAPLNPK	A
4	Pavir.Ia02104.1.p|PACid:30213356	Pavir.Ia02104.1.p|PACid:30213356	7906	46496	432	432	24	24	54.4	5.24	424739	1	0	0	603.852	2411.38	4	2411.38	-0.0034	0	30.3	19	30	0.0044	R	VAPEEHPVLLTEAPLNPK	A
4	Pavir.Ia02104.1.p|PACid:30213356	Pavir.Ia02104.1.p|PACid:30213356	7906	46496	432	432	24	24	54.4	5.24	424740	1	0	0	804.801	2411.38	3	2411.38	-0.0034	0	41.03	16	30	0.00017	R	VAPEEHPVLLTEAPLNPK	A
4	Pavir.Ia02104.1.p|PACid:30213356	Pavir.Ia02104.1.p|PACid:30213356	7906	46496	432	432	24	24	54.4	5.24	424742	1	0	0	804.801	2411.38	3	2411.38	-0.0032	0	21.28	14	30	0.01	R	VAPEEHPVLLTEAPLNPK	A
4	Pavir.Ia02104.1.p|PACid:30213356	Pavir.Ia02104.1.p|PACid:30213356	7906	46496	432	432	24	24	54.4	5.24	424743	1	0	0	804.801	2411.38	3	2411.38	-0.0032	0	51.46	16	30	1.5e-05	R	VAPEEHPVLLTEAPLNPK	A
4	Pavir.Ia02104.1.p|PACid:30213356	Pavir.Ia02104.1.p|PACid:30213356	7906	46496	432	432	24	24	54.4	5.24	424744	1	0	0	804.801	2411.38	3	2411.38	-0.0032	0	18.05	17	30	0.045	R	VAPEEHPVLLTEAPLNPK	A
4	Pavir.Ia02104.1.p|PACid:30213356	Pavir.Ia02104.1.p|PACid:30213356	7906	46496	432	432	24	24	54.4	5.24	424745	1	0	0	603.852	2411.38	4	2411.38	-0.0031	0	18.06	15	30	0.027	R	VAPEEHPVLLTEAPLNPK	A
4	Pavir.Ia02104.1.p|PACid:30213356	Pavir.Ia02104.1.p|PACid:30213356	7906	46496	432	432	24	24	54.4	5.24	424747	1	0	0	603.852	2411.38	4	2411.38	-0.0031	0	16.51	14	30	0.028	R	VAPEEHPVLLTEAPLNPK	A
4	Pavir.Ia02104.1.p|PACid:30213356	Pavir.Ia02104.1.p|PACid:30213356	7906	46496	432	432	24	24	54.4	5.24	424750	1	0	0	603.852	2411.38	4	2411.38	-0.0031	0	23.95	15	30	0.0071	R	VAPEEHPVLLTEAPLNPK	A
4	Pavir.Ia02104.1.p|PACid:30213356	Pavir.Ia02104.1.p|PACid:30213356	7906	46496	432	432	24	24	54.4	5.24	424754	1	0	0	804.801	2411.38	3	2411.38	-0.0028	0	31.19	14	30	0.0012	R	VAPEEHPVLLTEAPLNPK	A
4	Pavir.Ia02104.1.p|PACid:30213356	Pavir.Ia02104.1.p|PACid:30213356	7906	46496	432	432	24	24	54.4	5.24	424755	1	0	0	804.801	2411.38	3	2411.38	-0.0028	0	47.55	15	30	3.5e-05	R	VAPEEHPVLLTEAPLNPK	A
4	Pavir.Ia02104.1.p|PACid:30213356	Pavir.Ia02104.1.p|PACid:30213356	7906	46496	432	432	24	24	54.4	5.24	424756	1	0	0	804.801	2411.38	3	2411.38	-0.0028	0	59.81	16	30	2.5e-06	R	VAPEEHPVLLTEAPLNPK	A
4	Pavir.Ia02104.1.p|PACid:30213356	Pavir.Ia02104.1.p|PACid:30213356	7906	46496	432	432	24	24	54.4	5.24	424757	1	0	0	804.801	2411.38	3	2411.38	-0.0026	0	55.96	16	30	5.7e-06	R	VAPEEHPVLLTEAPLNPK	A
4	Pavir.Ia02104.1.p|PACid:30213356	Pavir.Ia02104.1.p|PACid:30213356	7906	46496	432	432	24	24	54.4	5.24	424758	1	0	0	804.801	2411.38	3	2411.38	-0.0026	0	58.83	16	30	3e-06	R	VAPEEHPVLLTEAPLNPK	A
4	Pavir.Ia02104.1.p|PACid:30213356	Pavir.Ia02104.1.p|PACid:30213356	7906	46496	432	432	24	24	54.4	5.24	424760	1	0	0	603.852	2411.38	4	2411.38	-0.0026	0	17.86	16	30	0.039	R	VAPEEHPVLLTEAPLNPK	A
4	Pavir.Ia02104.1.p|PACid:30213356	Pavir.Ia02104.1.p|PACid:30213356	7906	46496	432	432	24	24	54.4	5.24	424761	1	0	0	603.852	2411.38	4	2411.38	-0.0026	0	29.72	20	30	0.0055	R	VAPEEHPVLLTEAPLNPK	A
4	Pavir.Ia02104.1.p|PACid:30213356	Pavir.Ia02104.1.p|PACid:30213356	7906	46496	432	432	24	24	54.4	5.24	424763	1	0	0	804.801	2411.38	3	2411.38	-0.0025	0	24.73	17	30	0.0091	R	VAPEEHPVLLTEAPLNPK	A
4	Pavir.Ia02104.1.p|PACid:30213356	Pavir.Ia02104.1.p|PACid:30213356	7906	46496	432	432	24	24	54.4	5.24	424764	1	0	0	804.801	2411.38	3	2411.38	-0.0025	0	34.85	17	30	0.00087	R	VAPEEHPVLLTEAPLNPK	A
4	Pavir.Ia02104.1.p|PACid:30213356	Pavir.Ia02104.1.p|PACid:30213356	7906	46496	432	432	24	24	54.4	5.24	424766	1	0	0	804.801	2411.38	3	2411.38	-0.0023	0	43.58	19	30	0.0002	R	VAPEEHPVLLTEAPLNPK	A
4	Pavir.Ia02104.1.p|PACid:30213356	Pavir.Ia02104.1.p|PACid:30213356	7906	46496	432	432	24	24	54.4	5.24	424767	1	0	0	603.852	2411.38	4	2411.38	-0.0021	0	28.12	18	30	0.0057	R	VAPEEHPVLLTEAPLNPK	A
4	Pavir.Ia02104.1.p|PACid:30213356	Pavir.Ia02104.1.p|PACid:30213356	7906	46496	432	432	24	24	54.4	5.24	424770	1	0	0	804.801	2411.38	3	2411.38	-0.0019	0	23.76	21	30	0.028	R	VAPEEHPVLLTEAPLNPK	A
4	Pavir.Ia02104.1.p|PACid:30213356	Pavir.Ia02104.1.p|PACid:30213356	7906	46496	432	432	24	24	54.4	5.24	424772	1	0	0	804.801	2411.38	3	2411.38	-0.0019	0	34	15	30	0.00065	R	VAPEEHPVLLTEAPLNPK	A
4	Pavir.Ia02104.1.p|PACid:30213356	Pavir.Ia02104.1.p|PACid:30213356	7906	46496	432	432	24	24	54.4	5.24	424773	1	0	0	804.801	2411.38	3	2411.38	-0.0019	0	69.54	17	30	3e-07	R	VAPEEHPVLLTEAPLNPK	A
4	Pavir.Ia02104.1.p|PACid:30213356	Pavir.Ia02104.1.p|PACid:30213356	7906	46496	432	432	24	24	54.4	5.24	424774	1	0	0	804.801	2411.38	3	2411.38	-0.0017	0	25.42	15	30	0.0046	R	VAPEEHPVLLTEAPLNPK	A
4	Pavir.Ia02104.1.p|PACid:30213356	Pavir.Ia02104.1.p|PACid:30213356	7906	46496	432	432	24	24	54.4	5.24	424775	1	0	0	804.801	2411.38	3	2411.38	-0.0017	0	35.59	15	30	0.00047	R	VAPEEHPVLLTEAPLNPK	A
4	Pavir.Ia02104.1.p|PACid:30213356	Pavir.Ia02104.1.p|PACid:30213356	7906	46496	432	432	24	24	54.4	5.24	424779	1	0	0	1206.7	2411.38	2	2411.38	-0.0013	0	40.99	15	30	0.00015	R	VAPEEHPVLLTEAPLNPK	A
4	Pavir.Ia02104.1.p|PACid:30213356	Pavir.Ia02104.1.p|PACid:30213356	7906	46496	432	432	24	24	54.4	5.24	424781	1	0	0	603.853	2411.38	4	2411.38	-0.0012	0	29.76	23	30	0.012	R	VAPEEHPVLLTEAPLNPK	A
4	Pavir.Ia02104.1.p|PACid:30213356	Pavir.Ia02104.1.p|PACid:30213356	7906	46496	432	432	24	24	54.4	5.24	424784	1	0	0	603.853	2411.38	4	2411.38	-0.0007	0	24.65	19	30	0.014	R	VAPEEHPVLLTEAPLNPK	A
4	Pavir.Ia02104.1.p|PACid:30213356	Pavir.Ia02104.1.p|PACid:30213356	7906	46496	432	432	24	24	54.4	5.24	424786	1	0	0	603.853	2411.38	4	2411.38	-0.0005	0	31.63	19	30	0.0029	R	VAPEEHPVLLTEAPLNPK	A
4	Pavir.Ia02104.1.p|PACid:30213356	Pavir.Ia02104.1.p|PACid:30213356	7906	46496	432	432	24	24	54.4	5.24	424787	1	0	0	804.802	2411.38	3	2411.38	-0.0003	0	19.38	15	30	0.018	R	VAPEEHPVLLTEAPLNPK	A
4	Pavir.Ia02104.1.p|PACid:30213356	Pavir.Ia02104.1.p|PACid:30213356	7906	46496	432	432	24	24	54.4	5.24	424789	1	0	0	603.853	2411.38	4	2411.38	0.001	0	34.85	19	30	0.0014	R	VAPEEHPVLLTEAPLNPK	A
4	Pavir.Ia02104.1.p|PACid:30213356	Pavir.Ia02104.1.p|PACid:30213356	7906	46496	432	432	24	24	54.4	5.24	424791	1	0	0	804.802	2411.39	3	2411.38	0.0023	0	56.3	17	30	6.5e-06	R	VAPEEHPVLLTEAPLNPK	A
4	Pavir.Ia02104.1.p|PACid:30213356	Pavir.Ia02104.1.p|PACid:30213356	7906	46496	432	432	24	24	54.4	5.24	424886	1	0	0	805.128	2412.36	3	2412.37	-0.0054	0	47.37	18	31	6.2e-05	R	VAPEEHPVLLTEAPLNPK	A	Deamidated (NQ)	0.000000000000000200.0
4	Pavir.Ia02104.1.p|PACid:30213356	Pavir.Ia02104.1.p|PACid:30213356	7906	46496	432	432	24	24	54.4	5.24	424887	1	0	0	805.129	2412.37	3	2412.37	-0.0014	0	33.11	15	31	0.00079	R	VAPEEHPVLLTEAPLNPK	A	Deamidated (NQ)	0.000000000000000200.0
4	Pavir.Ia02104.1.p|PACid:30213356	Pavir.Ia02104.1.p|PACid:30213356	7906	46496	432	432	24	24	54.4	5.24	424899	1	0	0	1207.2	2412.38	2	2412.37	0.0137	0	37.44	15	30	0.00031	R	VAPEEHPVLLTEAPLNPK	A	Deamidated (NQ)	0.000000000000000200.0
4	Pavir.Ia02104.1.p|PACid:30213356	Pavir.Ia02104.1.p|PACid:30213356	7906	46496	432	432	24	24	54.4	5.24	424901	1	0	0	805.134	2412.38	3	2412.37	0.0139	0	17.4	14	30	0.023	R	VAPEEHPVLLTEAPLNPK	A	Deamidated (NQ)	0.000000000000000200.0
4	Pavir.Ia02104.1.p|PACid:30213356	Pavir.Ia02104.1.p|PACid:30213356	7906	46496	432	432	24	24	54.4	5.24	424914	1	0	0	604.103	2412.38	4	2412.37	0.0158	0	18.42	14	30	0.019	R	VAPEEHPVLLTEAPLNPK	A	Deamidated (NQ)	0.000000000000000200.0
4	Pavir.Ia02104.1.p|PACid:30213356	Pavir.Ia02104.1.p|PACid:30213356	7906	46496	432	432	24	24	54.4	5.24	424919	1	0	0	805.135	2412.38	3	2412.37	0.0164	0	40.81	15	30	0.00015	R	VAPEEHPVLLTEAPLNPK	A	Deamidated (NQ)	0.000000000000000200.0
4	Pavir.Ia02104.1.p|PACid:30213356	Pavir.Ia02104.1.p|PACid:30213356	7906	46496	432	432	24	24	54.4	5.24	424920	1	0	0	805.135	2412.38	3	2412.37	0.0171	0	14.91	13	30	0.04	R	VAPEEHPVLLTEAPLNPK	A	Deamidated (NQ)	0.000000000000000200.0
4	Pavir.Ia02104.1.p|PACid:30213356	Pavir.Ia02104.1.p|PACid:30213356	7906	46496	432	432	24	24	54.4	5.24	477680	1	0	0	689.147	2752.56	4	2752.56	-0.0051	1	40.85	15	29	0.00015	R	VAPEEHPVLLTEAPLNPKANR	E
4	Pavir.Ia02104.1.p|PACid:30213356	Pavir.Ia02104.1.p|PACid:30213356	7906	46496	432	432	24	24	54.4	5.24	477681	1	0	0	689.147	2752.56	4	2752.56	-0.0046	1	32.67	15	29	0.00086	R	VAPEEHPVLLTEAPLNPKANR	E
4	Pavir.Ia02104.1.p|PACid:30213356	Pavir.Ia02104.1.p|PACid:30213356	7906	46496	432	432	24	24	54.4	5.24	477682	1	0	0	689.148	2752.56	4	2752.56	-0.0031	1	35.46	15	29	0.00047	R	VAPEEHPVLLTEAPLNPKANR	E
4	Pavir.Ia02104.1.p|PACid:30213356	Pavir.Ia02104.1.p|PACid:30213356	7906	46496	432	432	24	24	54.4	5.24	477683	1	0	0	689.148	2752.56	4	2752.56	-0.0024	1	22.99	14	29	0.007	R	VAPEEHPVLLTEAPLNPKANR	E
4	Pavir.Ia02104.1.p|PACid:30213356	Pavir.Ia02104.1.p|PACid:30213356	7906	46496	432	432	24	24	54.4	5.24	477684	1	0	0	689.148	2752.56	4	2752.56	-0.0016	1	33.71	15	29	0.00076	R	VAPEEHPVLLTEAPLNPKANR	E
4	Pavir.Ia02104.1.p|PACid:30213356	Pavir.Ia02104.1.p|PACid:30213356	7906	46496	432	432	24	24	54.4	5.24	482317	1	0	0	929.169	2784.48	3	2784.49	-0.0045	1	31.67	14	32	0.0011	R	KDLYGNIVLSGGSTMFPGIADR	M	Oxidation (M)	0.0000000000000010000000.0
4	Pavir.Ia02104.1.p|PACid:30213356	Pavir.Ia02104.1.p|PACid:30213356	7906	46496	432	432	24	24	54.4	5.24	482318	1	0	0	929.169	2784.48	3	2784.49	-0.0045	1	68.06	22	32	1.3e-06	R	KDLYGNIVLSGGSTMFPGIADR	M	Oxidation (M)	0.0000000000000010000000.0
4	Pavir.Ia02104.1.p|PACid:30213356	Pavir.Ia02104.1.p|PACid:30213356	7906	46496	432	432	24	24	54.4	5.24	482320	1	0	0	697.129	2784.49	4	2784.49	-0.0011	1	52.26	16	32	1.3e-05	R	KDLYGNIVLSGGSTMFPGIADR	M	Oxidation (M)	0.0000000000000010000000.0
4	Pavir.Ia02104.1.p|PACid:30213356	Pavir.Ia02104.1.p|PACid:30213356	7906	46496	432	432	24	24	54.4	5.24	482488	1	0	0	929.503	2785.49	3	2785.47	0.0151	1	28.43	14	32	0.0022	R	KDLYGNIVLSGGSTMFPGIADR	M	Oxidation (M); Deamidated (NQ)	0.0000020000000010000000.0
4	Pavir.Ia02104.1.p|PACid:30213356	Pavir.Ia02104.1.p|PACid:30213356	7906	46496	432	432	24	24	54.4	5.24	506918	1	0	0	753.643	3010.54	4	3010.55	-0.0044	1	52.75	18	31	1.9e-05	R	HTGVMVGMGQKDAYVGDEAQSK	R	Oxidation (M)	0.0000100000000000000000.0
4	Pavir.Ia02104.1.p|PACid:30213356	Pavir.Ia02104.1.p|PACid:30213356	7906	46496	432	432	24	24	54.4	5.24	506919	1	0	0	753.643	3010.54	4	3010.55	-0.0039	1	53.57	21	31	2.9e-05	R	HTGVMVGMGQKDAYVGDEAQSK	R	Oxidation (M)	0.0000000100000000000000.0
4	Pavir.Ia02104.1.p|PACid:30213356	Pavir.Ia02104.1.p|PACid:30213356	7906	46496	432	432	24	24	54.4	5.24	506976	1	0	0	753.893	3011.54	4	3011.53	0.0118	1	17.77	14	31	0.022	R	HTGVMVGMGQKDAYVGDEAQSK	R	Oxidation (M); Deamidated (NQ)	0.0000000102000000000000.0
4	Pavir.Ia02104.1.p|PACid:30213356	Pavir.Ia02104.1.p|PACid:30213356	7906	46496	432	432	24	24	54.4	5.24	506978	1	0	0	753.893	3011.54	4	3011.53	0.0145	1	53.5	16	31	1e-05	R	HTGVMVGMGQKDAYVGDEAQSK	R	Oxidation (M); Deamidated (NQ)	0.0000100002000000000000.0
4	Pavir.Ia02104.1.p|PACid:30213356	Pavir.Ia02104.1.p|PACid:30213356	7906	46496	432	432	24	24	54.4	5.24	508109	1	0	0	757.64	3026.53	4	3026.54	-0.0086	1	21.97	17	31	0.016	R	HTGVMVGMGQKDAYVGDEAQSK	R	2 Oxidation (M)	0.0000100100000000000000.0
4	Pavir.Ia02104.1.p|PACid:30213356	Pavir.Ia02104.1.p|PACid:30213356	7906	46496	432	432	24	24	54.4	5.24	508182	1	0	0	757.892	3027.54	4	3027.53	0.013	1	41.29	15	31	0.00013	R	HTGVMVGMGQKDAYVGDEAQSK	R	2 Oxidation (M); Deamidated (NQ)	0.0000100102000000000000.0			Quantitation summary for protein	126/127C	1.12	339	N/A		N/A	127n/127C	1.124	368	N/A		N/A	128c/127C	1.088	359	N/A
5	Pavir.Eb04008.1.p|PACid:30314287	Pavir.Eb04008.1.p|PACid:30314287	7766	46707	431	431	25	25	56.2	5.24	6138	1	0	0	437.271	872.527	2	872.528	-0.0016	0	33.5		31	0.029	R	LDLAGR	D
5	Pavir.Eb04008.1.p|PACid:30314287	Pavir.Eb04008.1.p|PACid:30314287	7766	46707	431	431	25	25	56.2	5.24	19975	1	0	0	498.245	994.476	2	994.478	-0.0017	0	36.11		23	0.0025	K	CDVDIR	K
5	Pavir.Eb04008.1.p|PACid:30314287	Pavir.Eb04008.1.p|PACid:30314287	7766	46707	431	431	25	25	56.2	5.24	20175	1	0	0	498.805	995.596	2	995.597	-0.001	0	32.44		22	0.0046	K	VVAPPER	K
5	Pavir.Eb04008.1.p|PACid:30314287	Pavir.Eb04008.1.p|PACid:30314287	7766	46707	431	431	25	25	56.2	5.24	20178	1	0	0	498.805	995.596	2	995.597	-0.0003	0	22.49		22	0.046	K	VVAPPER	K
5	Pavir.Eb04008.1.p|PACid:30314287	Pavir.Eb04008.1.p|PACid:30314287	7766	46707	431	431	25	25	56.2	5.24	54539	1	0	0	603.308	1204.6	2	1204.6	-0.0031	0	51.51		25	0.00013	K	AGFAGDDAPR	A
5	Pavir.Eb04008.1.p|PACid:30314287	Pavir.Eb04008.1.p|PACid:30314287	7766	46707	431	431	25	25	56.2	5.24	54544	1	0	0	603.308	1204.6	2	1204.6	-0.0025	0	29.95		25	0.018	K	AGFAGDDAPR	A
5	Pavir.Eb04008.1.p|PACid:30314287	Pavir.Eb04008.1.p|PACid:30314287	7766	46707	431	431	25	25	56.2	5.24	54545	1	0	0	603.308	1204.6	2	1204.6	-0.0024	0	31.13		25	0.014	K	AGFAGDDAPR	A
5	Pavir.Eb04008.1.p|PACid:30314287	Pavir.Eb04008.1.p|PACid:30314287	7766	46707	431	431	25	25	56.2	5.24	54548	1	0	0	603.308	1204.6	2	1204.6	-0.0023	0	71.47		25	1.2e-06	K	AGFAGDDAPR	A
5	Pavir.Eb04008.1.p|PACid:30314287	Pavir.Eb04008.1.p|PACid:30314287	7766	46707	431	431	25	25	56.2	5.24	54549	1	0	0	603.308	1204.6	2	1204.6	-0.0023	0	33.6	16	25	0.00098	K	AGFAGDDAPR	A
5	Pavir.Eb04008.1.p|PACid:30314287	Pavir.Eb04008.1.p|PACid:30314287	7766	46707	431	431	25	25	56.2	5.24	54551	1	0	0	603.308	1204.6	2	1204.6	-0.0022	0	34.16		26	0.0078	K	AGFAGDDAPR	A
5	Pavir.Eb04008.1.p|PACid:30314287	Pavir.Eb04008.1.p|PACid:30314287	7766	46707	431	431	25	25	56.2	5.24	54552	1	0	0	603.308	1204.6	2	1204.6	-0.0022	0	43.82		26	0.00084	K	AGFAGDDAPR	A
5	Pavir.Eb04008.1.p|PACid:30314287	Pavir.Eb04008.1.p|PACid:30314287	7766	46707	431	431	25	25	56.2	5.24	54555	1	0	0	603.308	1204.6	2	1204.6	-0.002	0	35.13	25	26	0.006	K	AGFAGDDAPR	A
5	Pavir.Eb04008.1.p|PACid:30314287	Pavir.Eb04008.1.p|PACid:30314287	7766	46707	431	431	25	25	56.2	5.24	54559	1	0	0	603.308	1204.6	2	1204.6	-0.0019	0	17.57	14	26	0.025	K	AGFAGDDAPR	A
5	Pavir.Eb04008.1.p|PACid:30314287	Pavir.Eb04008.1.p|PACid:30314287	7766	46707	431	431	25	25	56.2	5.24	54560	1	0	0	603.308	1204.6	2	1204.6	-0.0019	0	56.77		26	4.3e-05	K	AGFAGDDAPR	A
5	Pavir.Eb04008.1.p|PACid:30314287	Pavir.Eb04008.1.p|PACid:30314287	7766	46707	431	431	25	25	56.2	5.24	54561	1	0	0	603.308	1204.6	2	1204.6	-0.0018	0	47.66		26	0.00035	K	AGFAGDDAPR	A
5	Pavir.Eb04008.1.p|PACid:30314287	Pavir.Eb04008.1.p|PACid:30314287	7766	46707	431	431	25	25	56.2	5.24	54565	1	0	0	603.308	1204.6	2	1204.6	-0.0016	0	59.96		26	2e-05	K	AGFAGDDAPR	A
5	Pavir.Eb04008.1.p|PACid:30314287	Pavir.Eb04008.1.p|PACid:30314287	7766	46707	431	431	25	25	56.2	5.24	54568	1	0	0	603.309	1204.6	2	1204.6	-0.0013	0	18.18	17	26	0.039	K	AGFAGDDAPR	A
5	Pavir.Eb04008.1.p|PACid:30314287	Pavir.Eb04008.1.p|PACid:30314287	7766	46707	431	431	25	25	56.2	5.24	54569	1	0	0	402.542	1204.6	3	1204.6	-0.0008	0	29.63	14	26	0.0017	K	AGFAGDDAPR	A
5	Pavir.Eb04008.1.p|PACid:30314287	Pavir.Eb04008.1.p|PACid:30314287	7766	46707	431	431	25	25	56.2	5.24	54570	1	0	0	603.309	1204.6	2	1204.6	-0.0007	0	36.56		26	0.005	K	AGFAGDDAPR	A
5	Pavir.Eb04008.1.p|PACid:30314287	Pavir.Eb04008.1.p|PACid:30314287	7766	46707	431	431	25	25	56.2	5.24	54573	1	0	0	603.309	1204.6	2	1204.6	-0.0005	0	30.06	22	26	0.0086	K	AGFAGDDAPR	A
5	Pavir.Eb04008.1.p|PACid:30314287	Pavir.Eb04008.1.p|PACid:30314287	7766	46707	431	431	25	25	56.2	5.24	55566	1	1	0	604.847	1207.68	2	1207.68	-0.0017	0	22.42	19	29	0.024	K	NSSSVEK	S
5	Pavir.Eb04008.1.p|PACid:30314287	Pavir.Eb04008.1.p|PACid:30314287	7766	46707	431	431	25	25	56.2	5.24	55822	1	1	0	605.339	1208.66	2	1208.67	-0.0012	0	22.92	21	28	0.033	K	NSSSVEK	S	Deamidated (NQ)	0.2000000.0
5	Pavir.Eb04008.1.p|PACid:30314287	Pavir.Eb04008.1.p|PACid:30314287	7766	46707	431	431	25	25	56.2	5.24	55823	1	1	0	605.339	1208.66	2	1208.67	-0.0011	0	21.44	18	28	0.025	K	NSSSVEK	S	Deamidated (NQ)	0.2000000.0
5	Pavir.Eb04008.1.p|PACid:30314287	Pavir.Eb04008.1.p|PACid:30314287	7766	46707	431	431	25	25	56.2	5.24	96280	1	1	0	674.339	1346.66	2	1346.67	-0.0033	0	52.85	19	25	2.1e-05	R	GYSFTTSAER	E
5	Pavir.Eb04008.1.p|PACid:30314287	Pavir.Eb04008.1.p|PACid:30314287	7766	46707	431	431	25	25	56.2	5.24	96281	1	1	0	674.34	1346.67	2	1346.67	-0.0018	0	55.24	17	26	8.5e-06	R	GYSFTTSAER	E
5	Pavir.Eb04008.1.p|PACid:30314287	Pavir.Eb04008.1.p|PACid:30314287	7766	46707	431	431	25	25	56.2	5.24	97988	1	0	0	676.874	1351.73	2	1351.74	-0.0028	1	22.19	14	30	0.0093	K	CDVDIRK	D
5	Pavir.Eb04008.1.p|PACid:30314287	Pavir.Eb04008.1.p|PACid:30314287	7766	46707	431	431	25	25	56.2	5.24	97996	1	0	0	676.874	1351.73	2	1351.74	-0.0025	1	15.99	14	30	0.037	K	CDVDIRK	D
5	Pavir.Eb04008.1.p|PACid:30314287	Pavir.Eb04008.1.p|PACid:30314287	7766	46707	431	431	25	25	56.2	5.24	98004	1	0	0	451.585	1351.73	3	1351.74	-0.002	1	19.17	16	30	0.029	K	CDVDIRK	D
5	Pavir.Eb04008.1.p|PACid:30314287	Pavir.Eb04008.1.p|PACid:30314287	7766	46707	431	431	25	25	56.2	5.24	98009	1	0	0	451.585	1351.73	3	1351.74	-0.0018	1	20.93	17	30	0.022	K	CDVDIRK	D
5	Pavir.Eb04008.1.p|PACid:30314287	Pavir.Eb04008.1.p|PACid:30314287	7766	46707	431	431	25	25	56.2	5.24	98379	1	0	0	677.433	1352.85	2	1352.85	-0.0031	1	34.56	16	27	0.0008	K	VVAPPERK	Y
5	Pavir.Eb04008.1.p|PACid:30314287	Pavir.Eb04008.1.p|PACid:30314287	7766	46707	431	431	25	25	56.2	5.24	98383	1	0	0	451.958	1352.85	3	1352.85	-0.0027	1	17.45	14	27	0.023	K	VVAPPERK	Y
5	Pavir.Eb04008.1.p|PACid:30314287	Pavir.Eb04008.1.p|PACid:30314287	7766	46707	431	431	25	25	56.2	5.24	98385	1	0	0	451.958	1352.85	3	1352.85	-0.0027	1	14.83	13	27	0.041	K	VVAPPERK	Y
5	Pavir.Eb04008.1.p|PACid:30314287	Pavir.Eb04008.1.p|PACid:30314287	7766	46707	431	431	25	25	56.2	5.24	98397	1	0	0	677.433	1352.85	2	1352.85	-0.0025	1	32.66	16	27	0.0012	K	VVAPPERK	Y
5	Pavir.Eb04008.1.p|PACid:30314287	Pavir.Eb04008.1.p|PACid:30314287	7766	46707	431	431	25	25	56.2	5.24	98412	1	0	0	451.958	1352.85	3	1352.85	-0.0022	1	16.94	14	27	0.026	K	VVAPPERK	Y
5	Pavir.Eb04008.1.p|PACid:30314287	Pavir.Eb04008.1.p|PACid:30314287	7766	46707	431	431	25	25	56.2	5.24	98425	1	0	0	677.434	1352.85	2	1352.85	-0.0017	1	30.16	14	27	0.0015	K	VVAPPERK	Y
5	Pavir.Eb04008.1.p|PACid:30314287	Pavir.Eb04008.1.p|PACid:30314287	7766	46707	431	431	25	25	56.2	5.24	107168	1	0	0	690.893	1379.77	2	1379.77	-0.0014	0	43.51	28	30	0.0015	R	DLTDSLMK	I
5	Pavir.Eb04008.1.p|PACid:30314287	Pavir.Eb04008.1.p|PACid:30314287	7766	46707	431	431	25	25	56.2	5.24	112025	1	0	0	698.89	1395.77	2	1395.77	-0.0028	0	31.22	18	29	0.003	R	DLTDSLMK	I	Oxidation (M)	0.00000010.0
5	Pavir.Eb04008.1.p|PACid:30314287	Pavir.Eb04008.1.p|PACid:30314287	7766	46707	431	431	25	25	56.2	5.24	112028	1	0	0	698.89	1395.77	2	1395.77	-0.0022	0	27.41	17	29	0.0052	R	DLTDSLMK	I	Oxidation (M)	0.00000010.0
5	Pavir.Eb04008.1.p|PACid:30314287	Pavir.Eb04008.1.p|PACid:30314287	7766	46707	431	431	25	25	56.2	5.24	112029	1	0	0	698.891	1395.77	2	1395.77	-0.0008	0	22.6	14	29	0.0076	R	DLTDSLMK	I	Oxidation (M)	0.00000010.0
5	Pavir.Eb04008.1.p|PACid:30314287	Pavir.Eb04008.1.p|PACid:30314287	7766	46707	431	431	25	25	56.2	5.24	122517	1	0	0	476.626	1426.86	3	1426.86	-0.0044	0	16.1	14	28	0.031	R	AVFPSIVGRPR	H
5	Pavir.Eb04008.1.p|PACid:30314287	Pavir.Eb04008.1.p|PACid:30314287	7766	46707	431	431	25	25	56.2	5.24	122519	1	0	0	476.627	1426.86	3	1426.86	-0.0033	0	26.3	14	28	0.0034	R	AVFPSIVGRPR	H
5	Pavir.Eb04008.1.p|PACid:30314287	Pavir.Eb04008.1.p|PACid:30314287	7766	46707	431	431	25	25	56.2	5.24	122520	1	0	0	476.627	1426.86	3	1426.86	-0.0031	0	34.83	16	28	0.00078	R	AVFPSIVGRPR	H
5	Pavir.Eb04008.1.p|PACid:30314287	Pavir.Eb04008.1.p|PACid:30314287	7766	46707	431	431	25	25	56.2	5.24	122521	1	0	0	476.627	1426.86	3	1426.86	-0.0029	0	29.18	15	28	0.0021	R	AVFPSIVGRPR	H
5	Pavir.Eb04008.1.p|PACid:30314287	Pavir.Eb04008.1.p|PACid:30314287	7766	46707	431	431	25	25	56.2	5.24	122523	1	0	0	476.627	1426.86	3	1426.86	-0.0027	0	14.69	13	28	0.042	R	AVFPSIVGRPR	H
5	Pavir.Eb04008.1.p|PACid:30314287	Pavir.Eb04008.1.p|PACid:30314287	7766	46707	431	431	25	25	56.2	5.24	122524	1	0	0	476.627	1426.86	3	1426.86	-0.0025	0	27.01	24	28	0.031	R	AVFPSIVGRPR	H
5	Pavir.Eb04008.1.p|PACid:30314287	Pavir.Eb04008.1.p|PACid:30314287	7766	46707	431	431	25	25	56.2	5.24	122525	1	0	0	476.627	1426.86	3	1426.86	-0.0025	0	42.68	25	28	0.00093	R	AVFPSIVGRPR	H
5	Pavir.Eb04008.1.p|PACid:30314287	Pavir.Eb04008.1.p|PACid:30314287	7766	46707	431	431	25	25	56.2	5.24	122526	1	0	0	476.627	1426.86	3	1426.86	-0.0024	0	35.06	25	28	0.0051	R	AVFPSIVGRPR	H
5	Pavir.Eb04008.1.p|PACid:30314287	Pavir.Eb04008.1.p|PACid:30314287	7766	46707	431	431	25	25	56.2	5.24	122528	1	0	0	476.627	1426.86	3	1426.86	-0.0022	0	31.5	18	28	0.0025	R	AVFPSIVGRPR	H
5	Pavir.Eb04008.1.p|PACid:30314287	Pavir.Eb04008.1.p|PACid:30314287	7766	46707	431	431	25	25	56.2	5.24	122529	1	0	0	476.627	1426.86	3	1426.86	-0.0021	0	28.17	25	28	0.025	R	AVFPSIVGRPR	H
5	Pavir.Eb04008.1.p|PACid:30314287	Pavir.Eb04008.1.p|PACid:30314287	7766	46707	431	431	25	25	56.2	5.24	122530	1	0	0	476.627	1426.86	3	1426.86	-0.002	0	30.2	24	28	0.013	R	AVFPSIVGRPR	H
5	Pavir.Eb04008.1.p|PACid:30314287	Pavir.Eb04008.1.p|PACid:30314287	7766	46707	431	431	25	25	56.2	5.24	122531	1	0	0	476.627	1426.86	3	1426.86	-0.002	0	34.03	26	28	0.0098	R	AVFPSIVGRPR	H
5	Pavir.Eb04008.1.p|PACid:30314287	Pavir.Eb04008.1.p|PACid:30314287	7766	46707	431	431	25	25	56.2	5.24	122532	1	0	0	476.627	1426.86	3	1426.86	-0.002	0	20.88	14	28	0.011	R	AVFPSIVGRPR	H
5	Pavir.Eb04008.1.p|PACid:30314287	Pavir.Eb04008.1.p|PACid:30314287	7766	46707	431	431	25	25	56.2	5.24	122533	1	0	0	476.627	1426.86	3	1426.86	-0.002	0	35.29	26	28	0.0069	R	AVFPSIVGRPR	H
5	Pavir.Eb04008.1.p|PACid:30314287	Pavir.Eb04008.1.p|PACid:30314287	7766	46707	431	431	25	25	56.2	5.24	122534	1	0	0	476.627	1426.86	3	1426.86	-0.0018	0	32.16	15	28	0.0011	R	AVFPSIVGRPR	H
5	Pavir.Eb04008.1.p|PACid:30314287	Pavir.Eb04008.1.p|PACid:30314287	7766	46707	431	431	25	25	56.2	5.24	122535	1	0	0	476.627	1426.86	3	1426.86	-0.0017	0	25.04	14	28	0.0045	R	AVFPSIVGRPR	H
5	Pavir.Eb04008.1.p|PACid:30314287	Pavir.Eb04008.1.p|PACid:30314287	7766	46707	431	431	25	25	56.2	5.24	122536	1	0	0	476.627	1426.86	3	1426.86	-0.0017	0	28.33	17	28	0.0046	R	AVFPSIVGRPR	H
5	Pavir.Eb04008.1.p|PACid:30314287	Pavir.Eb04008.1.p|PACid:30314287	7766	46707	431	431	25	25	56.2	5.24	122538	1	0	0	476.627	1426.86	3	1426.86	-0.0013	0	21.52	14	28	0.0096	R	AVFPSIVGRPR	H
5	Pavir.Eb04008.1.p|PACid:30314287	Pavir.Eb04008.1.p|PACid:30314287	7766	46707	431	431	25	25	56.2	5.24	122539	1	0	0	476.627	1426.86	3	1426.86	-0.0012	0	31.14	14	28	0.0012	R	AVFPSIVGRPR	H
5	Pavir.Eb04008.1.p|PACid:30314287	Pavir.Eb04008.1.p|PACid:30314287	7766	46707	431	431	25	25	56.2	5.24	122540	1	0	0	476.628	1426.86	3	1426.86	0.0002	0	31.36	18	27	0.0024	R	AVFPSIVGRPR	H
5	Pavir.Eb04008.1.p|PACid:30314287	Pavir.Eb04008.1.p|PACid:30314287	7766	46707	431	431	25	25	56.2	5.24	122541	1	0	0	476.629	1426.86	3	1426.86	0.0034	0	33.19	17	27	0.0015	R	AVFPSIVGRPR	H
5	Pavir.Eb04008.1.p|PACid:30314287	Pavir.Eb04008.1.p|PACid:30314287	7766	46707	431	431	25	25	56.2	5.24	122542	1	0	0	476.629	1426.87	3	1426.86	0.0041	0	32.38	15	27	0.00092	R	AVFPSIVGRPR	H
5	Pavir.Eb04008.1.p|PACid:30314287	Pavir.Eb04008.1.p|PACid:30314287	7766	46707	431	431	25	25	56.2	5.24	183711	1	0	0	534.966	1601.87	3	1601.88	-0.0039	0	29.18	14	30	0.0018	R	HTGVMVGMGQK	D
5	Pavir.Eb04008.1.p|PACid:30314287	Pavir.Eb04008.1.p|PACid:30314287	7766	46707	431	431	25	25	56.2	5.24	183712	1	0	0	534.966	1601.88	3	1601.88	-0.0037	0	31.03	14	30	0.0012	R	HTGVMVGMGQK	D
5	Pavir.Eb04008.1.p|PACid:30314287	Pavir.Eb04008.1.p|PACid:30314287	7766	46707	431	431	25	25	56.2	5.24	183715	1	0	0	534.966	1601.88	3	1601.88	-0.0033	0	43.61	15	30	8.1e-05	R	HTGVMVGMGQK	D
5	Pavir.Eb04008.1.p|PACid:30314287	Pavir.Eb04008.1.p|PACid:30314287	7766	46707	431	431	25	25	56.2	5.24	183720	1	0	0	534.966	1601.88	3	1601.88	-0.0024	0	43.85	16	30	8.5e-05	R	HTGVMVGMGQK	D
5	Pavir.Eb04008.1.p|PACid:30314287	Pavir.Eb04008.1.p|PACid:30314287	7766	46707	431	431	25	25	56.2	5.24	183722	1	0	0	534.966	1601.88	3	1601.88	-0.0017	0	55.54	16	30	6.7e-06	R	HTGVMVGMGQK	D
5	Pavir.Eb04008.1.p|PACid:30314287	Pavir.Eb04008.1.p|PACid:30314287	7766	46707	431	431	25	25	56.2	5.24	183723	1	0	0	401.477	1601.88	4	1601.88	-0.0014	0	21.88	15	30	0.011	R	HTGVMVGMGQK	D
5	Pavir.Eb04008.1.p|PACid:30314287	Pavir.Eb04008.1.p|PACid:30314287	7766	46707	431	431	25	25	56.2	5.24	183724	1	0	0	534.966	1601.88	3	1601.88	-0.0013	0	28.03	14	30	0.0024	R	HTGVMVGMGQK	D
5	Pavir.Eb04008.1.p|PACid:30314287	Pavir.Eb04008.1.p|PACid:30314287	7766	46707	431	431	25	25	56.2	5.24	183726	1	0	0	801.946	1601.88	2	1601.88	-0.0006	0	78.21	17	30	4.7e-08	R	HTGVMVGMGQK	D
5	Pavir.Eb04008.1.p|PACid:30314287	Pavir.Eb04008.1.p|PACid:30314287	7766	46707	431	431	25	25	56.2	5.24	185017	1	0	0	803.466	1604.92	2	1604.92	-0.0029	0	49.09		31	0.00088	K	EITALAPSSMK	I
5	Pavir.Eb04008.1.p|PACid:30314287	Pavir.Eb04008.1.p|PACid:30314287	7766	46707	431	431	25	25	56.2	5.24	185018	1	0	0	803.466	1604.92	2	1604.92	-0.0027	0	68.25		31	1.1e-05	K	EITALAPSSMK	I
5	Pavir.Eb04008.1.p|PACid:30314287	Pavir.Eb04008.1.p|PACid:30314287	7766	46707	431	431	25	25	56.2	5.24	185021	1	0	0	535.98	1604.92	3	1604.92	-0.0025	0	30.4	15	31	0.0015	K	EITALAPSSMK	I
5	Pavir.Eb04008.1.p|PACid:30314287	Pavir.Eb04008.1.p|PACid:30314287	7766	46707	431	431	25	25	56.2	5.24	185024	1	0	0	535.98	1604.92	3	1604.92	-0.0019	0	50.45	18	31	3.2e-05	K	EITALAPSSMK	I
5	Pavir.Eb04008.1.p|PACid:30314287	Pavir.Eb04008.1.p|PACid:30314287	7766	46707	431	431	25	25	56.2	5.24	185027	1	0	0	535.981	1604.92	3	1604.92	-0.0015	0	54.15	18	31	1.4e-05	K	EITALAPSSMK	I
5	Pavir.Eb04008.1.p|PACid:30314287	Pavir.Eb04008.1.p|PACid:30314287	7766	46707	431	431	25	25	56.2	5.24	185029	1	0	0	803.467	1604.92	2	1604.92	-0.0008	0	62.18		31	4.1e-05	K	EITALAPSSMK	I
5	Pavir.Eb04008.1.p|PACid:30314287	Pavir.Eb04008.1.p|PACid:30314287	7766	46707	431	431	25	25	56.2	5.24	185038	1	0	0	803.468	1604.92	2	1604.92	0.0006	0	49.32		31	0.0008	K	EITALAPSSMK	I
5	Pavir.Eb04008.1.p|PACid:30314287	Pavir.Eb04008.1.p|PACid:30314287	7766	46707	431	431	25	25	56.2	5.24	189366	1	0	0	540.297	1617.87	3	1617.87	-0.0045	0	39.43	21	30	0.00086	R	HTGVMVGMGQK	D	Oxidation (M)	0.00000001000.0
5	Pavir.Eb04008.1.p|PACid:30314287	Pavir.Eb04008.1.p|PACid:30314287	7766	46707	431	431	25	25	56.2	5.24	189368	1	0	0	540.297	1617.87	3	1617.87	-0.0045	0	36.45	15	30	0.00038	R	HTGVMVGMGQK	D	Oxidation (M)	0.00001000000.0
5	Pavir.Eb04008.1.p|PACid:30314287	Pavir.Eb04008.1.p|PACid:30314287	7766	46707	431	431	25	25	56.2	5.24	189370	1	0	0	540.297	1617.87	3	1617.87	-0.004	0	13.92	13	30	0.049	R	HTGVMVGMGQK	D	Oxidation (M)	0.00001000000.0
5	Pavir.Eb04008.1.p|PACid:30314287	Pavir.Eb04008.1.p|PACid:30314287	7766	46707	431	431	25	25	56.2	5.24	189372	1	0	0	540.297	1617.87	3	1617.87	-0.0038	0	15.34	13	30	0.036	R	HTGVMVGMGQK	D	Oxidation (M)	0.00001000000.0
5	Pavir.Eb04008.1.p|PACid:30314287	Pavir.Eb04008.1.p|PACid:30314287	7766	46707	431	431	25	25	56.2	5.24	189373	1	0	0	540.297	1617.87	3	1617.87	-0.0036	0	15.59	13	30	0.034	R	HTGVMVGMGQK	D	Oxidation (M)	0.00001000000.0
5	Pavir.Eb04008.1.p|PACid:30314287	Pavir.Eb04008.1.p|PACid:30314287	7766	46707	431	431	25	25	56.2	5.24	189374	1	0	0	540.297	1617.87	3	1617.87	-0.0036	0	18.32	14	30	0.019	R	HTGVMVGMGQK	D	Oxidation (M)	0.00001000000.0
5	Pavir.Eb04008.1.p|PACid:30314287	Pavir.Eb04008.1.p|PACid:30314287	7766	46707	431	431	25	25	56.2	5.24	189375	1	0	0	540.297	1617.87	3	1617.87	-0.0036	0	17.28	14	30	0.024	R	HTGVMVGMGQK	D	Oxidation (M)	0.00001000000.0
5	Pavir.Eb04008.1.p|PACid:30314287	Pavir.Eb04008.1.p|PACid:30314287	7766	46707	431	431	25	25	56.2	5.24	189376	1	0	0	540.297	1617.87	3	1617.87	-0.0034	0	31.48	14	30	0.0011	R	HTGVMVGMGQK	D	Oxidation (M)	0.00000001000.0
5	Pavir.Eb04008.1.p|PACid:30314287	Pavir.Eb04008.1.p|PACid:30314287	7766	46707	431	431	25	25	56.2	5.24	189377	1	0	0	540.297	1617.87	3	1617.87	-0.0033	0	23.21	21	30	0.033	R	HTGVMVGMGQK	D	Oxidation (M)	0.00001000000.0
5	Pavir.Eb04008.1.p|PACid:30314287	Pavir.Eb04008.1.p|PACid:30314287	7766	46707	431	431	25	25	56.2	5.24	189379	1	0	0	540.297	1617.87	3	1617.87	-0.0033	0	51.25	16	30	1.6e-05	R	HTGVMVGMGQK	D	Oxidation (M)	0.00000001000.0
5	Pavir.Eb04008.1.p|PACid:30314287	Pavir.Eb04008.1.p|PACid:30314287	7766	46707	431	431	25	25	56.2	5.24	189381	1	0	0	540.298	1617.87	3	1617.87	-0.0031	0	35.71	16	30	0.00054	R	HTGVMVGMGQK	D	Oxidation (M)	0.00001000000.0
5	Pavir.Eb04008.1.p|PACid:30314287	Pavir.Eb04008.1.p|PACid:30314287	7766	46707	431	431	25	25	56.2	5.24	189382	1	0	0	540.298	1617.87	3	1617.87	-0.0031	0	38.8	15	30	0.00023	R	HTGVMVGMGQK	D	Oxidation (M)	0.00000001000.0
5	Pavir.Eb04008.1.p|PACid:30314287	Pavir.Eb04008.1.p|PACid:30314287	7766	46707	431	431	25	25	56.2	5.24	189384	1	0	0	405.475	1617.87	4	1617.87	-0.0029	0	37.13	22	30	0.0018	R	HTGVMVGMGQK	D	Oxidation (M)	0.00000001000.0
5	Pavir.Eb04008.1.p|PACid:30314287	Pavir.Eb04008.1.p|PACid:30314287	7766	46707	431	431	25	25	56.2	5.24	189385	1	0	0	540.298	1617.87	3	1617.87	-0.0029	0	47.63	15	30	3.4e-05	R	HTGVMVGMGQK	D	Oxidation (M)	0.00000001000.0
5	Pavir.Eb04008.1.p|PACid:30314287	Pavir.Eb04008.1.p|PACid:30314287	7766	46707	431	431	25	25	56.2	5.24	189386	1	0	0	540.298	1617.87	3	1617.87	-0.0027	0	50.76	16	30	1.7e-05	R	HTGVMVGMGQK	D	Oxidation (M)	0.00000001000.0
5	Pavir.Eb04008.1.p|PACid:30314287	Pavir.Eb04008.1.p|PACid:30314287	7766	46707	431	431	25	25	56.2	5.24	189387	1	0	0	540.298	1617.87	3	1617.87	-0.0027	0	20.01	16	30	0.021	R	HTGVMVGMGQK	D	Oxidation (M)	0.00001000000.0
5	Pavir.Eb04008.1.p|PACid:30314287	Pavir.Eb04008.1.p|PACid:30314287	7766	46707	431	431	25	25	56.2	5.24	189390	1	0	0	809.943	1617.87	2	1617.87	-0.0026	0	40	15	30	0.00018	R	HTGVMVGMGQK	D	Oxidation (M)	0.00000001000.0
5	Pavir.Eb04008.1.p|PACid:30314287	Pavir.Eb04008.1.p|PACid:30314287	7766	46707	431	431	25	25	56.2	5.24	189392	1	0	0	809.943	1617.87	2	1617.87	-0.0024	0	16.96	14	30	0.026	R	HTGVMVGMGQK	D	Oxidation (M)	0.00000001000.0
5	Pavir.Eb04008.1.p|PACid:30314287	Pavir.Eb04008.1.p|PACid:30314287	7766	46707	431	431	25	25	56.2	5.24	189393	1	0	0	540.298	1617.87	3	1617.87	-0.0023	0	17.08	14	30	0.025	R	HTGVMVGMGQK	D	Oxidation (M)	0.00001000000.0
5	Pavir.Eb04008.1.p|PACid:30314287	Pavir.Eb04008.1.p|PACid:30314287	7766	46707	431	431	25	25	56.2	5.24	189394	1	0	0	540.298	1617.87	3	1617.87	-0.0023	0	24	14	30	0.0056	R	HTGVMVGMGQK	D	Oxidation (M)	0.00000001000.0
5	Pavir.Eb04008.1.p|PACid:30314287	Pavir.Eb04008.1.p|PACid:30314287	7766	46707	431	431	25	25	56.2	5.24	189395	1	0	0	405.475	1617.87	4	1617.87	-0.0022	0	31.48	16	30	0.0016	R	HTGVMVGMGQK	D	Oxidation (M)	0.00000001000.0
5	Pavir.Eb04008.1.p|PACid:30314287	Pavir.Eb04008.1.p|PACid:30314287	7766	46707	431	431	25	25	56.2	5.24	189396	1	0	0	540.298	1617.87	3	1617.87	-0.0021	0	24.79	14	30	0.0047	R	HTGVMVGMGQK	D	Oxidation (M)	0.00001000000.0
5	Pavir.Eb04008.1.p|PACid:30314287	Pavir.Eb04008.1.p|PACid:30314287	7766	46707	431	431	25	25	56.2	5.24	189397	1	0	0	540.298	1617.87	3	1617.87	-0.0021	0	27.34	14	30	0.0027	R	HTGVMVGMGQK	D	Oxidation (M)	0.00001000000.0
5	Pavir.Eb04008.1.p|PACid:30314287	Pavir.Eb04008.1.p|PACid:30314287	7766	46707	431	431	25	25	56.2	5.24	189398	1	0	0	540.298	1617.87	3	1617.87	-0.0021	0	29.56	14	30	0.0017	R	HTGVMVGMGQK	D	Oxidation (M)	0.00000001000.0
5	Pavir.Eb04008.1.p|PACid:30314287	Pavir.Eb04008.1.p|PACid:30314287	7766	46707	431	431	25	25	56.2	5.24	189400	1	0	0	540.298	1617.87	3	1617.87	-0.0021	0	46.04	15	30	4.8e-05	R	HTGVMVGMGQK	D	Oxidation (M)	0.00000001000.0
5	Pavir.Eb04008.1.p|PACid:30314287	Pavir.Eb04008.1.p|PACid:30314287	7766	46707	431	431	25	25	56.2	5.24	189401	1	0	0	540.298	1617.87	3	1617.87	-0.0021	0	36.05	16	30	0.00053	R	HTGVMVGMGQK	D	Oxidation (M)	0.00001000000.0
5	Pavir.Eb04008.1.p|PACid:30314287	Pavir.Eb04008.1.p|PACid:30314287	7766	46707	431	431	25	25	56.2	5.24	189402	1	0	0	540.298	1617.87	3	1617.87	-0.0021	0	37.78	15	30	0.00033	R	HTGVMVGMGQK	D	Oxidation (M)	0.00001000000.0
5	Pavir.Eb04008.1.p|PACid:30314287	Pavir.Eb04008.1.p|PACid:30314287	7766	46707	431	431	25	25	56.2	5.24	189403	1	0	0	540.298	1617.87	3	1617.87	-0.002	0	33.7	15	30	0.00069	R	HTGVMVGMGQK	D	Oxidation (M)	0.00001000000.0
5	Pavir.Eb04008.1.p|PACid:30314287	Pavir.Eb04008.1.p|PACid:30314287	7766	46707	431	431	25	25	56.2	5.24	189404	1	0	0	540.298	1617.87	3	1617.87	-0.002	0	33.45	15	30	0.00073	R	HTGVMVGMGQK	D	Oxidation (M)	0.00001000000.0
5	Pavir.Eb04008.1.p|PACid:30314287	Pavir.Eb04008.1.p|PACid:30314287	7766	46707	431	431	25	25	56.2	5.24	189405	1	0	0	540.298	1617.87	3	1617.87	-0.002	0	34.36	15	30	0.0006	R	HTGVMVGMGQK	D	Oxidation (M)	0.00000001000.0
5	Pavir.Eb04008.1.p|PACid:30314287	Pavir.Eb04008.1.p|PACid:30314287	7766	46707	431	431	25	25	56.2	5.24	189406	1	0	0	540.298	1617.87	3	1617.87	-0.002	0	39.74	15	30	0.00019	R	HTGVMVGMGQK	D	Oxidation (M)	0.00001000000.0
5	Pavir.Eb04008.1.p|PACid:30314287	Pavir.Eb04008.1.p|PACid:30314287	7766	46707	431	431	25	25	56.2	5.24	189407	1	0	0	540.298	1617.87	3	1617.87	-0.0018	0	35.96	15	30	0.00043	R	HTGVMVGMGQK	D	Oxidation (M)	0.00001000000.0
5	Pavir.Eb04008.1.p|PACid:30314287	Pavir.Eb04008.1.p|PACid:30314287	7766	46707	431	431	25	25	56.2	5.24	189408	1	0	0	540.298	1617.87	3	1617.87	-0.0018	0	43.87	17	30	0.00011	R	HTGVMVGMGQK	D	Oxidation (M)	0.00001000000.0
5	Pavir.Eb04008.1.p|PACid:30314287	Pavir.Eb04008.1.p|PACid:30314287	7766	46707	431	431	25	25	56.2	5.24	189410	1	0	0	540.298	1617.87	3	1617.87	-0.0016	0	28.35	14	30	0.0022	R	HTGVMVGMGQK	D	Oxidation (M)	0.00001000000.0
5	Pavir.Eb04008.1.p|PACid:30314287	Pavir.Eb04008.1.p|PACid:30314287	7766	46707	431	431	25	25	56.2	5.24	189411	1	0	0	540.298	1617.87	3	1617.87	-0.0016	0	31.56	14	30	0.0011	R	HTGVMVGMGQK	D	Oxidation (M)	0.00000001000.0
5	Pavir.Eb04008.1.p|PACid:30314287	Pavir.Eb04008.1.p|PACid:30314287	7766	46707	431	431	25	25	56.2	5.24	189412	1	0	0	809.943	1617.87	2	1617.87	-0.0015	0	51.67	16	30	1.4e-05	R	HTGVMVGMGQK	D	Oxidation (M)	0.00001000000.0
5	Pavir.Eb04008.1.p|PACid:30314287	Pavir.Eb04008.1.p|PACid:30314287	7766	46707	431	431	25	25	56.2	5.24	189413	1	0	0	540.298	1617.87	3	1617.87	-0.0014	0	26.83	14	30	0.003	R	HTGVMVGMGQK	D	Oxidation (M)	0.00001000000.0
5	Pavir.Eb04008.1.p|PACid:30314287	Pavir.Eb04008.1.p|PACid:30314287	7766	46707	431	431	25	25	56.2	5.24	189414	1	0	0	540.298	1617.87	3	1617.87	-0.0014	0	51.27	16	30	1.6e-05	R	HTGVMVGMGQK	D	Oxidation (M)	0.00000001000.0
5	Pavir.Eb04008.1.p|PACid:30314287	Pavir.Eb04008.1.p|PACid:30314287	7766	46707	431	431	25	25	56.2	5.24	189415	1	0	0	540.298	1617.87	3	1617.87	-0.0014	0	35.59	16	30	0.00057	R	HTGVMVGMGQK	D	Oxidation (M)	0.00001000000.0
5	Pavir.Eb04008.1.p|PACid:30314287	Pavir.Eb04008.1.p|PACid:30314287	7766	46707	431	431	25	25	56.2	5.24	189416	1	0	0	809.943	1617.87	2	1617.87	-0.0012	0	37.99	15	30	0.00027	R	HTGVMVGMGQK	D	Oxidation (M)	0.00001000000.0
5	Pavir.Eb04008.1.p|PACid:30314287	Pavir.Eb04008.1.p|PACid:30314287	7766	46707	431	431	25	25	56.2	5.24	189417	1	0	0	540.298	1617.87	3	1617.87	-0.001	0	18.88	14	30	0.017	R	HTGVMVGMGQK	D	Oxidation (M)	0.00000001000.0
5	Pavir.Eb04008.1.p|PACid:30314287	Pavir.Eb04008.1.p|PACid:30314287	7766	46707	431	431	25	25	56.2	5.24	189418	1	0	0	540.298	1617.87	3	1617.87	-0.0009	0	25.14	14	30	0.0044	R	HTGVMVGMGQK	D	Oxidation (M)	0.00001000000.0
5	Pavir.Eb04008.1.p|PACid:30314287	Pavir.Eb04008.1.p|PACid:30314287	7766	46707	431	431	25	25	56.2	5.24	189419	1	0	0	540.298	1617.87	3	1617.87	-0.0009	0	23.94	14	30	0.0057	R	HTGVMVGMGQK	D	Oxidation (M)	0.00001000000.0
5	Pavir.Eb04008.1.p|PACid:30314287	Pavir.Eb04008.1.p|PACid:30314287	7766	46707	431	431	25	25	56.2	5.24	189420	1	0	0	540.298	1617.87	3	1617.87	-0.0007	0	17.43	14	30	0.023	R	HTGVMVGMGQK	D	Oxidation (M)	0.00001000000.0
5	Pavir.Eb04008.1.p|PACid:30314287	Pavir.Eb04008.1.p|PACid:30314287	7766	46707	431	431	25	25	56.2	5.24	189421	1	0	0	809.944	1617.87	2	1617.87	-0.0007	0	29.55	14	30	0.0017	R	HTGVMVGMGQK	D	Oxidation (M)	0.00000001000.0
5	Pavir.Eb04008.1.p|PACid:30314287	Pavir.Eb04008.1.p|PACid:30314287	7766	46707	431	431	25	25	56.2	5.24	189422	1	0	0	540.299	1617.87	3	1617.87	0.0004	0	15.31	13	30	0.037	R	HTGVMVGMGQK	D	Oxidation (M)	0.00001000000.0
5	Pavir.Eb04008.1.p|PACid:30314287	Pavir.Eb04008.1.p|PACid:30314287	7766	46707	431	431	25	25	56.2	5.24	189423	1	0	0	405.476	1617.87	4	1617.87	0.0006	0	14.97	14	30	0.041	R	HTGVMVGMGQK	D	Oxidation (M)	0.00001000000.0
5	Pavir.Eb04008.1.p|PACid:30314287	Pavir.Eb04008.1.p|PACid:30314287	7766	46707	431	431	25	25	56.2	5.24	189428	1	0	0	540.299	1617.88	3	1617.87	0.0024	0	36.28	16	30	0.00049	R	HTGVMVGMGQK	D	Oxidation (M)	0.00001000000.0
5	Pavir.Eb04008.1.p|PACid:30314287	Pavir.Eb04008.1.p|PACid:30314287	7766	46707	431	431	25	25	56.2	5.24	190980	1	0	0	811.463	1620.91	2	1620.92	-0.0042	0	22.18	21	31	0.044	K	EITALAPSSMK	I	Oxidation (M)	0.00000000010.0
5	Pavir.Eb04008.1.p|PACid:30314287	Pavir.Eb04008.1.p|PACid:30314287	7766	46707	431	431	25	25	56.2	5.24	190984	1	0	0	541.311	1620.91	3	1620.92	-0.0038	0	37.8	16	31	0.00038	K	EITALAPSSMK	I	Oxidation (M)	0.00000000010.0
5	Pavir.Eb04008.1.p|PACid:30314287	Pavir.Eb04008.1.p|PACid:30314287	7766	46707	431	431	25	25	56.2	5.24	190987	1	0	0	541.312	1620.91	3	1620.92	-0.0029	0	23	14	31	0.0075	K	EITALAPSSMK	I	Oxidation (M)	0.00000000010.0
5	Pavir.Eb04008.1.p|PACid:30314287	Pavir.Eb04008.1.p|PACid:30314287	7766	46707	431	431	25	25	56.2	5.24	190988	1	0	0	811.464	1620.91	2	1620.92	-0.0029	0	47.29		31	0.0013	K	EITALAPSSMK	I	Oxidation (M)	0.00000000010.0
5	Pavir.Eb04008.1.p|PACid:30314287	Pavir.Eb04008.1.p|PACid:30314287	7766	46707	431	431	25	25	56.2	5.24	190990	1	0	0	541.312	1620.91	3	1620.92	-0.0026	0	17.99	14	31	0.025	K	EITALAPSSMK	I	Oxidation (M)	0.00000000010.0
5	Pavir.Eb04008.1.p|PACid:30314287	Pavir.Eb04008.1.p|PACid:30314287	7766	46707	431	431	25	25	56.2	5.24	190993	1	0	0	811.464	1620.91	2	1620.92	-0.0025	0	49.67		31	0.00073	K	EITALAPSSMK	I	Oxidation (M)	0.00000000010.0
5	Pavir.Eb04008.1.p|PACid:30314287	Pavir.Eb04008.1.p|PACid:30314287	7766	46707	431	431	25	25	56.2	5.24	190995	1	0	0	811.464	1620.91	2	1620.92	-0.0024	0	23.82	20	31	0.023	K	EITALAPSSMK	I	Oxidation (M)	0.00000000010.0
5	Pavir.Eb04008.1.p|PACid:30314287	Pavir.Eb04008.1.p|PACid:30314287	7766	46707	431	431	25	25	56.2	5.24	191002	1	0	0	541.312	1620.91	3	1620.92	-0.0018	0	24.55	14	31	0.005	K	EITALAPSSMK	I	Oxidation (M)	0.00000000010.0
5	Pavir.Eb04008.1.p|PACid:30314287	Pavir.Eb04008.1.p|PACid:30314287	7766	46707	431	431	25	25	56.2	5.24	191005	1	0	0	811.465	1620.91	2	1620.92	-0.0017	0	18.33	14	31	0.022	K	EITALAPSSMK	I	Oxidation (M)	0.00000000010.0
5	Pavir.Eb04008.1.p|PACid:30314287	Pavir.Eb04008.1.p|PACid:30314287	7766	46707	431	431	25	25	56.2	5.24	191007	1	0	0	541.312	1620.91	3	1620.92	-0.0017	0	47.77	19	31	8e-05	K	EITALAPSSMK	I	Oxidation (M)	0.00000000010.0
5	Pavir.Eb04008.1.p|PACid:30314287	Pavir.Eb04008.1.p|PACid:30314287	7766	46707	431	431	25	25	56.2	5.24	191009	1	0	0	541.312	1620.91	3	1620.92	-0.0015	0	36.7	16	31	0.00045	K	EITALAPSSMK	I	Oxidation (M)	0.00000000010.0
5	Pavir.Eb04008.1.p|PACid:30314287	Pavir.Eb04008.1.p|PACid:30314287	7766	46707	431	431	25	25	56.2	5.24	191013	1	0	0	541.312	1620.91	3	1620.92	-0.0013	0	29.29	16	31	0.0024	K	EITALAPSSMK	I	Oxidation (M)	0.00000000010.0
5	Pavir.Eb04008.1.p|PACid:30314287	Pavir.Eb04008.1.p|PACid:30314287	7766	46707	431	431	25	25	56.2	5.24	191014	1	0	0	541.312	1620.91	3	1620.92	-0.0013	0	41.75	20	31	0.00042	K	EITALAPSSMK	I	Oxidation (M)	0.00000000010.0
5	Pavir.Eb04008.1.p|PACid:30314287	Pavir.Eb04008.1.p|PACid:30314287	7766	46707	431	431	25	25	56.2	5.24	191015	1	0	0	541.312	1620.91	3	1620.92	-0.0013	0	42.51	16	31	0.00014	K	EITALAPSSMK	I	Oxidation (M)	0.00000000010.0
5	Pavir.Eb04008.1.p|PACid:30314287	Pavir.Eb04008.1.p|PACid:30314287	7766	46707	431	431	25	25	56.2	5.24	191016	1	0	0	811.465	1620.92	2	1620.92	-0.0011	0	38.07		31	0.01	K	EITALAPSSMK	I	Oxidation (M)	0.00000000010.0
5	Pavir.Eb04008.1.p|PACid:30314287	Pavir.Eb04008.1.p|PACid:30314287	7766	46707	431	431	25	25	56.2	5.24	195908	1	0	0	817.938	1633.86	2	1633.87	-0.0062	0	22.57	14	30	0.0076	R	HTGVMVGMGQK	D	2 Oxidation (M)	0.00001001000.0
5	Pavir.Eb04008.1.p|PACid:30314287	Pavir.Eb04008.1.p|PACid:30314287	7766	46707	431	431	25	25	56.2	5.24	195909	1	0	0	545.628	1633.86	3	1633.87	-0.0055	0	19.16	17	30	0.036	R	HTGVMVGMGQK	D	2 Oxidation (M)	0.00001001000.0
5	Pavir.Eb04008.1.p|PACid:30314287	Pavir.Eb04008.1.p|PACid:30314287	7766	46707	431	431	25	25	56.2	5.24	195912	1	0	0	545.629	1633.86	3	1633.87	-0.0048	0	15.21	13	30	0.037	R	HTGVMVGMGQK	D	2 Oxidation (M)	0.00001001000.0
5	Pavir.Eb04008.1.p|PACid:30314287	Pavir.Eb04008.1.p|PACid:30314287	7766	46707	431	431	25	25	56.2	5.24	195913	1	0	0	817.939	1633.86	2	1633.87	-0.0046	0	18.76	14	30	0.017	R	HTGVMVGMGQK	D	2 Oxidation (M)	0.00001001000.0
5	Pavir.Eb04008.1.p|PACid:30314287	Pavir.Eb04008.1.p|PACid:30314287	7766	46707	431	431	25	25	56.2	5.24	195914	1	0	0	545.629	1633.86	3	1633.87	-0.0045	0	22.32	14	30	0.0083	R	HTGVMVGMGQK	D	2 Oxidation (M)	0.00001001000.0
5	Pavir.Eb04008.1.p|PACid:30314287	Pavir.Eb04008.1.p|PACid:30314287	7766	46707	431	431	25	25	56.2	5.24	195917	1	0	0	545.629	1633.86	3	1633.87	-0.0043	0	21.16	16	30	0.018	R	HTGVMVGMGQK	D	2 Oxidation (M)	0.00001001000.0
5	Pavir.Eb04008.1.p|PACid:30314287	Pavir.Eb04008.1.p|PACid:30314287	7766	46707	431	431	25	25	56.2	5.24	195919	1	0	0	545.629	1633.86	3	1633.87	-0.0041	0	24.02	19	30	0.016	R	HTGVMVGMGQK	D	2 Oxidation (M)	0.00001001000.0
5	Pavir.Eb04008.1.p|PACid:30314287	Pavir.Eb04008.1.p|PACid:30314287	7766	46707	431	431	25	25	56.2	5.24	195922	1	0	0	545.629	1633.86	3	1633.87	-0.0039	0	14.72	14	30	0.045	R	HTGVMVGMGQK	D	2 Oxidation (M)	0.00001001000.0
5	Pavir.Eb04008.1.p|PACid:30314287	Pavir.Eb04008.1.p|PACid:30314287	7766	46707	431	431	25	25	56.2	5.24	195924	1	0	0	545.629	1633.86	3	1633.87	-0.0039	0	14.42	13	30	0.044	R	HTGVMVGMGQK	D	2 Oxidation (M)	0.00001001000.0
5	Pavir.Eb04008.1.p|PACid:30314287	Pavir.Eb04008.1.p|PACid:30314287	7766	46707	431	431	25	25	56.2	5.24	195925	1	0	0	545.629	1633.86	3	1633.87	-0.0039	0	34.06	20	30	0.0024	R	HTGVMVGMGQK	D	2 Oxidation (M)	0.00001001000.0
5	Pavir.Eb04008.1.p|PACid:30314287	Pavir.Eb04008.1.p|PACid:30314287	7766	46707	431	431	25	25	56.2	5.24	195926	1	0	0	545.629	1633.86	3	1633.87	-0.0039	0	26.24	18	30	0.0085	R	HTGVMVGMGQK	D	2 Oxidation (M)	0.00001001000.0
5	Pavir.Eb04008.1.p|PACid:30314287	Pavir.Eb04008.1.p|PACid:30314287	7766	46707	431	431	25	25	56.2	5.24	195927	1	0	0	545.629	1633.86	3	1633.87	-0.0039	0	26.74	14	30	0.0031	R	HTGVMVGMGQK	D	2 Oxidation (M)	0.00001001000.0
[truncated: 148,743 more rows]
[truncated: 31 more columns]
