# Supplementary material for: Association of Proteomics Changes with Al-Sensitive Root Zones in Switchgrass
Source: Proteomes. 2018 Mar 22;6(2):15. doi: 10.3390/proteomes6020015 (PMC6027131; doi:10.3390/proteomes6020015)
Supplement: Supplementary file 1 [file proteomes-06-00015-s001.zip › Supplementary materials/supplementary materials Table S1.xlsx]

## Sheet: Total 400 RT
Total identified proteins in 400 µM root-tip tissues
							Annotation (A. thaliana database)
Protein ID	No. peptides	t-test P-value	Treatment-log2 ratio	Log2 mean	Log2 -mean	Fold change	Accession	Description
30185070	10	0.0064	0.3559	0.39	-0.0341	0.976641	AT2G03510.1	SPFH/Band 7/PHB domain-containing membrane-associated protein family
30185080	26	<.0001	0.29391	0.39	-0.09609	0.935565	AT1G55150.1	DEA(D/H)-box RNA helicase family protein
30185128	1	0.0118	0.5572	0.39	0.1672	1.12288	AT5G05170.1	Cellulose synthase family protein
30185142	19	0.0038	0.18833	0.39	-0.20167	0.869543	AT5G14670.1	ADP-ribosylation factor A1B
30185151	7	0.0169	0.2708	0.39	-0.1192	0.920698	AT5G17770.1	NADH:cytochrome B5 reductase 1
30185155	5	0.0004	0.4478	0.39	0.0578	1.04088	AT5G18900.1	2-oxoglutarate (2OG) and Fe(II)-dependent oxygenase superfamily protein
30185168	5	0.0204	0.32	0.39	-0.07	0.952638	AT1G05620.1	uridine-ribohydrolase 2
30185183	1	0.3434	0.4613	0.39	0.0713	1.05066	AT5G13420.1	Aldolase-type TIM barrel family protein
30185249	1	0.756	0.1705	0.39	-0.2195	0.858863	AT3G13470.1	TCP-1/cpn60 chaperonin family protein
30185282	5	0.2635	0.1899	0.39	-0.2001	0.87049	AT5G25530.1	DNAJ heat shock family protein
30185318	5	0.0013	0.4561	0.39	0.0661	1.04688	AT4G31500.1	cytochrome P450, family 83, subfamily B, polypeptide 1
30185405	3	0.4226	-0.2262	0.39	-0.6162	0.652387	AT1G18970.1	germin-like protein 4
30185460	9	0.0036	-0.3952	0.39	-0.7852	0.580272	AT3G25230.1	rotamase FKBP 1
30185542	3	0.0025	0.8053	0.39	0.4153	1.33358	AT5G45550.1	Mob1/phocein family protein
30185591	2	0.4925	0.121	0.39	-0.269	0.829895	AT1G23890.2	NHL domain-containing protein
30185592	2	0.0062	-0.28199	0.39	-0.67199	0.62764	AT5G32470.1	Haem oxygenase-like, multi-helical
30185598	1	0.1338	0.6959	0.39	0.3059	1.23619	AT3G19280.1	fucosyltransferase 11
30185603	3	0.0117	0.3701	0.39	-0.0199	0.986301
30185605	1	0.3501	0.2968	0.39	-0.0932	0.937441	AT4G04885.1	PCF11P-similar protein 4
30185607	1	0.99	0.003457	0.39	-0.386543	0.76496
30185615	1	0.3144	0.488	0.39	0.098	1.07029	AT4G10260.1	pfkB-like carbohydrate kinase family protein
30185650	1	0.1471	0.3252	0.39	-0.0648	0.956078	AT1G17370.1	oligouridylate binding protein 1B
30185674	1	0.8644	0.04269	0.39	-0.34731	0.786048	AT3G63190.1	ribosome recycling factor, chloroplast precursor
30185752	8	0.1614	0.3338	0.39	-0.0562	0.961794	AT4G16450.2
30185814	3	0.0015	0.4928	0.39	0.1028	1.07386	AT3G49180.1	Transducin/WD40 repeat-like superfamily protein
30185834	1	0.1486	0.4028	0.39	0.0128	1.00891	AT1G08080.1	alpha carbonic anhydrase 7
30185835	6	<.0001	0.37357	0.39	-0.01643	0.988676	AT3G60600.1	vesicle associated protein
30185943	3	<.0001	0.8606	0.39	0.4706	1.38569	AT2G24420.1	DNA repair ATPase-related
30185990	7	0.0045	0.28701	0.39	-0.10299	0.931101	AT4G18100.1	Ribosomal protein L32e
30186007	18	<.0001	0.36983	0.39	-0.02017	0.986116	AT1G17745.2	D-3-phosphoglycerate dehydrogenase
30186020	2	0.0145	0.4258	0.39	0.0358	1.02513	AT4G10960.1	UDP-D-glucose/UDP-D-galactose 4-epimerase 5
30186071	1	0.1963	0.5577	0.39	0.1677	1.12327	AT1G27970.1	nuclear transport factor 2B
30186082	3	0.2139	0.2043	0.39	-0.1857	0.879222	AT3G48330.2	protein-l-isoaspartate methyltransferase 1
30186089	1	0.5645	0.194	0.39	-0.196	0.872968	AT3G11560.2	LETM1-like protein
30186092	2	0.1586	0.4501	0.39	0.0601	1.04254	AT3G07390.1	auxin-responsive family protein
30186103	3	0.0066	0.3649	0.39	-0.0251	0.982752	AT5G48930.1	hydroxycinnamoyl-CoA shikimate/quinate hydroxycinnamoyl transferase
30186116	4	<.0001	0.6705	0.39	0.2805	1.21462	AT1G30580.1	GTP binding
30186143	6	0.0054	0.22974	0.39	-0.16026	0.894864	AT2G46750.1	D-arabinono-1,4-lactone oxidase family protein
30186150	2	0.8859	0.07349	0.39	-0.31651	0.80301	AT2G36130.1	Cyclophilin-like peptidyl-prolyl cis-trans isomerase family protein
30186157	8	<.0001	0.57303	0.39	0.18303	1.13527	AT1G80490.2	TOPLESS-related 1
30186230	2	0.295	0.3356	0.39	-0.0544	0.962995	AT3G23940.1	dehydratase family
30186283	1	0.1	0.5424	0.39	0.1524	1.11142	AT2G35040.1	AICARFT/IMPCHase bienzyme family protein
30186302	2	0.0005	0.6029	0.39	0.2129	1.15902	AT1G73430.1	sec34-like family protein
30186336	15	<.0001	0.42279	0.39	0.03279	1.02299	AT2G05710.1	aconitase 3
30186351	7	0.1605	0.1903	0.39	-0.1997	0.870732	AT3G02100.1	UDP-Glycosyltransferase superfamily protein
30186363	11	0.7105	-0.03553	0.39	-0.42553	0.744565	AT1G11840.6	glyoxalase I homolog
30186366	5	0.0008	0.33577	0.39	-0.05423	0.963108	AT1G22410.1	Class-II DAHP synthetase family protein
30186378	4	0.1648	0.4048	0.39	0.0148	1.01031	AT1G02180.1	ferredoxin-related
30186379	1	0.4627	0.1934	0.39	-0.1966	0.872605	AT5G28840.1	GDP-D-mannose 3\',5\'-epimerase
30186382	2	0.0498	0.4696	0.39	0.0796	1.05673	AT5G56280.1	COP9 signalosome subunit 6A
30186387	2	0.1589	0.275	0.39	-0.115	0.923382	AT3G29010.1	Biotin/lipoate A/B protein ligase family
30186390	1	0.9514	-0.0186	0.39	-0.4086	0.753354	AT2G46760.1	D-arabinono-1,4-lactone oxidase family protein
30186398	1	0.2459	0.773	0.39	0.383	1.30405	AT5G23950.1	Calcium-dependent lipid-binding (CaLB domain) family protein
30186406	2	<.0001	1.1584	0.39	0.7684	1.70338	AT2G36930.1	zinc finger (C2H2 type) family protein
30186437	6	0.0073	0.5174	0.39	0.1274	1.09232	AT1G20200.1	PAM domain (PCI/PINT associated module) protein
30186446	8	<.0001	0.8804	0.39	0.4904	1.40483	AT5G52060.1	BCL-2-associated athanogene 1
30186465	1	0.0324	0.5431	0.39	0.1531	1.11196	AT2G06050.3	oxophytodienoate-reductase 3
30186471	9	0.0031	0.30818	0.39	-0.08182	0.944865	AT2G23140.1	RING/U-box superfamily protein with ARM repeat domain
30186489	7	<.0001	0.43191	0.39	0.04191	1.02948	AT4G10610.1	CTC-interacting domain 12
30186498	1	0.0237	0.5489	0.39	0.1589	1.11644	AT5G57550.1	xyloglucan endotransglucosylase/hydrolase 25
30186509	5	0.0004	0.5484	0.39	0.1584	1.11605	AT1G31070.2	N-acetylglucosamine-1-phosphate uridylyltransferase 1
30186523	1	0.1614	0.6952	0.39	0.3052	1.23559	AT5G64200.1	ortholog of human splicing factor SC35
30186531	1	0.1372	0.4926	0.39	0.1026	1.07371	AT5G59790.1	Domain of unknown function (DUF966)
30186533	7	0.1849	0.13026	0.39	-0.25974	0.835238	AT5G17330.1	glutamate decarboxylase
30186554	1	0.6395	0.1972	0.39	-0.1928	0.874906	AT4G22310.1	Uncharacterised protein family (UPF0041)
30186575	2	0.6116	0.1766	0.39	-0.2134	0.862502	AT3G11750.1	Dihydroneopterin aldolase
30186590	16	<.0001	0.56067	0.39	0.17067	1.12558	AT1G67430.1	Ribosomal protein L22p/L17e family protein
30186596	1	0.3991	0.3716	0.39	-0.0184	0.987327	AT1G20540.1	Transducin/WD40 repeat-like superfamily protein
30186601	6	0.0004	0.4687	0.39	0.0787	1.05607	AT3G12050.1	Aha1 domain-containing protein
30186607	1	0.0158	0.6664	0.39	0.2764	1.21117	AT2G36910.1	ATP binding cassette subfamily B1
30186647	4	0.4582	0.184	0.39	-0.206	0.866938
30186665	47	<.0001	0.45905	0.39	0.06905	1.04903	AT1G12310.1	Calcium-binding EF-hand family protein
30186676	1	0.1303	0.601	0.39	0.211	1.15749	AT3G27190.1	uridine kinase-like 2
30186678	1	0.3087	-0.1529	0.39	-0.5429	0.68639	AT2G35736.2
30186680	1	0.2038	0.2948	0.39	-0.0952	0.936142	AT2G46180.1	golgin candidate 4
30186692	2	0.1357	0.2583	0.39	-0.1317	0.912755	AT1G68650.1	Uncharacterized protein family (UPF0016)
30186714	6	<.0001	0.45648	0.39	0.06648	1.04716	AT5G14790.1	ARM repeat superfamily protein
30186734	7	0.0017	0.4153	0.39	0.0253	1.01769	AT4G27585.1	SPFH/Band 7/PHB domain-containing membrane-associated protein family
30186739	6	<.0001	0.63035	0.39	0.24035	1.18128	AT1G12110.1	nitrate transporter 1.1
30186746	5	0.0016	0.32701	0.39	-0.06299	0.957278	AT3G13060.2	evolutionarily conserved C-terminal region 5
30186758	8	0.1807	0.2752	0.39	-0.1148	0.92351	AT5G53620.2
30186773	6	0.3615	0.2478	0.39	-0.1422	0.906136	AT4G28730.1	Glutaredoxin family protein
30186795	4	0.0033	0.6839	0.39	0.2939	1.22595	AT3G52300.1	ATP synthase D chain, mitochondrial
30186826	1	0.3414	0.331	0.39	-0.059	0.959929	AT2G25110.1	stromal cell-derived factor 2-like protein precursor
30186861	4	<.0001	0.48685	0.39	0.09685	1.06944	AT1G06560.1	NOL1/NOP2/sun family protein
30186866	2	0.0298	0.6743	0.39	0.2843	1.21782	AT4G22320.1
30186868	1	0.0553	0.4363	0.39	0.0463	1.03261	AT4G24510.1	HXXXD-type acyl-transferase family protein
30186872	8	0.0762	0.2236	0.39	-0.1664	0.891063	AT1G12230.1	Aldolase superfamily protein
30186898	4	0.0001	1.1602	0.39	0.7702	1.70551	AT2G42680.1	multiprotein bridging factor 1A
30186910	3	<.0001	0.6433	0.39	0.2533	1.19193	AT1G55740.1	seed imbibition 1
30186971	7	<.0001	0.51785	0.39	0.12785	1.09266	AT3G54670.3	Structural maintenance of chromosomes (SMC) family protein
30186975	8	0.4839	0.2011	0.39	-0.1889	0.877274	AT3G02520.1	general regulatory factor 7
30186990	5	0.0002	0.38053	0.39	-0.00947	0.993457	AT5G50260.1	Cysteine proteinases superfamily protein
30186997	2	0.6925	0.09947	0.39	-0.29053	0.817602	AT4G34050.1	S-adenosyl-L-methionine-dependent methyltransferases superfamily protein
30187071	1	0.4982	-0.1606	0.39	-0.5506	0.682736	AT3G23570.1	alpha/beta-Hydrolases superfamily protein
30187088	13	<.0001	0.83755	0.39	0.44755	1.36372	AT1G08360.1	Ribosomal protein L1p/L10e family
30187167	7	0.7699	0.07703	0.39	-0.31297	0.804983	AT3G10090.1	Nucleic acid-binding, OB-fold-like protein
30187176	23	0.0419	0.18016	0.39	-0.20984	0.864633	AT5G54160.1	O-methyltransferase 1
30187213	1	0.0873	0.4641	0.39	0.0741	1.0527	AT5G10460.1	Haloacid dehalogenase-like hydrolase (HAD) superfamily protein
30187253	1	0.2881	0.605	0.39	0.215	1.1607	AT2G42310.1
30187271	3	0.0145	0.2957	0.39	-0.0943	0.936727	AT5G55300.2	DNA topoisomerase I alpha
30187283	2	0.0084	0.4985	0.39	0.1085	1.07811	AT3G60820.1	N-terminal nucleophile aminohydrolases (Ntn hydrolases) superfamily protein
30187335	9	0.0002	0.34306	0.39	-0.04694	0.967987	AT2G22360.1	DNAJ heat shock family protein
30187346	5	<.0001	0.5387	0.39	0.1487	1.10857	AT5G25100.1	Endomembrane protein 70 protein family
30187351	7	0.0149	0.2793	0.39	-0.1107	0.926139	AT3G47520.1	malate dehydrogenase
30187356	1	0.056	0.6375	0.39	0.2475	1.18715	AT3G52220.1
30187368	1	0.2574	0.5563	0.39	0.1663	1.12218	AT2G18990.1	thioredoxin domain-containing protein 9 homolog
30187385	11	<.0001	0.44378	0.39	0.05378	1.03798	AT2G22230.1	Thioesterase superfamily protein
30187401	2	0.1901	0.2646	0.39	-0.1254	0.91675	AT4G38090.1	Ribosomal protein S5 domain 2-like superfamily protein
30187404	2	0.0352	0.5411	0.39	0.1511	1.11042	AT2G24270.4	aldehyde dehydrogenase 11A3
30187408	2	0.1584	0.4102	0.39	0.0202	1.0141	AT4G34050.1	S-adenosyl-L-methionine-dependent methyltransferases superfamily protein
30187457	10	0.0123	0.3004	0.39	-0.0896	0.939783	AT4G38900.2	Basic-leucine zipper (bZIP) transcription factor family protein
30187473	1	0.019	0.6363	0.39	0.2463	1.18616	AT3G20240.1	Mitochondrial substrate carrier family protein
30187488	5	<.0001	0.743	0.39	0.353	1.27721	AT4G39330.1	cinnamyl alcohol dehydrogenase 9
30187499	5	0.0039	0.28722	0.39	-0.10278	0.931237	AT3G02540.3	Rad23 UV excision repair protein family
30187533	3	0.0065	0.3467	0.39	-0.0433	0.970433	AT5G43130.1	TBP-associated factor 4
30187537	10	0.0002	0.4041	0.39	0.0141	1.00982	AT1G11650.2	RNA-binding (RRM/RBD/RNP motifs) family protein
30187541	2	0.0512	0.3785	0.39	-0.0115	0.99206	AT2G32980.1
30187547	1	0.5286	0.09843	0.39	-0.29157	0.817012	AT3G20250.1	pumilio 5
30187551	7	<.0001	0.44107	0.39	0.05107	1.03603	AT3G59350.1	Protein kinase superfamily protein
30187552	3	0.1298	0.3577	0.39	-0.0323	0.97786	AT1G47480.1	alpha/beta-Hydrolases superfamily protein
30187556	6	0.029	0.3598	0.39	-0.0302	0.979285	AT2G46750.1	D-arabinono-1,4-lactone oxidase family protein
30187571	2	0.5914	0.1687	0.39	-0.2213	0.857792	AT2G36800.1	don-glucosyltransferase 1
30187576	8	<.0001	0.6852	0.39	0.2952	1.22706	AT1G76550.1	Phosphofructokinase family protein
30187580	1	0.1717	0.3481	0.39	-0.0419	0.971375	AT4G38220.1	Peptidase M20/M25/M40 family protein
30187606	2	0.0011	0.6001	0.39	0.2101	1.15677	AT5G55500.1	beta-1,2-xylosyltransferase
30187607	4	<.0001	0.6608	0.39	0.2708	1.20648	AT1G79720.1	Eukaryotic aspartyl protease family protein
30187623	19	<.0001	0.33025	0.39	-0.05975	0.95943	AT4G00100.1	ribosomal protein S13A
30187642	15	<.0001	0.83153	0.39	0.44153	1.35804	AT4G39200.1	Ribosomal protein S25 family protein
30187646	1	0.0158	0.5885	0.39	0.1985	1.1475	AT5G57460.1
30187651	4	<.0001	0.5287	0.39	0.1387	1.10091	AT2G44200.1	CBF1-interacting co-repressor CIR, N-terminal;Pre-mRNA splicing factor
30187689	15	<.0001	0.40838	0.39	0.01838	1.01282	AT3G04120.1	glyceraldehyde-3-phosphate dehydrogenase C subunit 1
30187706	42	<.0001	0.40468	0.39	0.01468	1.01023	AT1G21320.1	nucleotide binding;nucleic acid binding
30187713	1	0.0244	0.5512	0.39	0.1612	1.11822	AT2G31820.1	Ankyrin repeat family protein
30187717	1	0.5676	0.3973	0.39	0.0073	1.00507	AT5G43970.1	translocase of outer membrane 22-V
30187727	2	0.0754	0.3611	0.39	-0.0289	0.980167	AT5G61620.1	myb-like transcription factor family protein
30187732	1	0.63	0.146	0.39	-0.244	0.844401	AT4G10490.1	2-oxoglutarate (2OG) and Fe(II)-dependent oxygenase superfamily protein
30187740	1	0.2047	0.365	0.39	-0.025	0.982821	AT5G60790.1	ABC transporter family protein
30187752	2	0.1571	0.3469	0.39	-0.0431	0.970567	AT3G45070.1	P-loop containing nucleoside triphosphate hydrolases superfamily protein
30187765	1	0.15	0.5319	0.39	0.1419	1.10336	AT5G04600.1	RNA-binding (RRM/RBD/RNP motifs) family protein
30187771	2	0.0906	0.489	0.39	0.099	1.07103	AT1G15950.1	cinnamoyl coa reductase 1
30187796	1	0.3263	0.2538	0.39	-0.1362	0.909913	AT1G19130.1
30187797	1	0.6161	0.2743	0.39	-0.1157	0.922934	AT3G07660.1	Kinase-related protein of unknown function (DUF1296)
30187801	3	0.0356	0.4517	0.39	0.0617	1.04369	AT4G37530.1	Peroxidase superfamily protein
30187803	2	0.1107	0.2889	0.39	-0.1011	0.932322	AT5G54060.1	UDP-glucose:flavonoid 3-o-glucosyltransferase
30187831	3	0.0278	1.6201	0.39	1.2301	2.34583	AT4G26780.1	Co-chaperone GrpE family protein
30187839	4	0.3412	0.1141	0.39	-0.2759	0.825935	AT2G27100.1	C2H2 zinc-finger protein SERRATE (SE)
30187844	15	<.0001	0.48459	0.39	0.09459	1.06776	AT3G21240.1	4-coumarate:CoA ligase 2
30187869	1	0.2685	0.3362	0.39	-0.0538	0.963395	AT4G10070.1	KH domain-containing protein
30187898	1	0.1848	0.4539	0.39	0.0639	1.04529	AT5G63870.1	serine/threonine phosphatase 7
30187925	14	<.0001	0.53091	0.39	0.14091	1.1026	AT1G29880.1	glycyl-tRNA synthetase / glycine--tRNA ligase
30187961	26	<.0001	0.31964	0.39	-0.07036	0.9524	AT5G35530.1	Ribosomal protein S3 family protein
30187972	22	<.0001	0.44268	0.39	0.05268	1.03719	AT3G27240.1	Cytochrome C1 family
30187977	13	0.001	0.22995	0.39	-0.16005	0.894994	AT5G37720.1	ALWAYS EARLY 4
30188046	6	<.0001	0.53843	0.39	0.14843	1.10836	AT1G63770.3	Peptidase M1 family protein
30188049	1	0.1779	0.5237	0.39	0.1337	1.0971	AT4G10970.4
30188078	1	0.0108	0.9212	0.39	0.5312	1.44513	AT1G80750.1	Ribosomal protein L30/L7 family protein
30188092	1	0.2634	0.3274	0.39	-0.0626	0.957537	AT5G60170.2	RNA binding (RRM/RBD/RNP motifs) family protein
30188120	1	0.1674	0.4339	0.39	0.0439	1.0309	AT2G04030.1	Chaperone protein htpG family protein
30188121	5	0.001	0.3878	0.39	-0.0022	0.998476	AT4G25770.1	alpha/beta-Hydrolases superfamily protein
30188130	1	0.053	0.411	0.39	0.021	1.01466	AT1G24090.1	RNase H family protein
30188202	9	0.8979	-0.01287	0.39	-0.40287	0.756352	AT1G74920.1	aldehyde dehydrogenase 10A8
30188232	9	0.0005	0.3911	0.39	0.0011	1.00076	AT5G42220.1	Ubiquitin-like superfamily protein
30188238	1	0.1349	0.5544	0.39	0.1644	1.1207	AT2G33585.1
30188253	5	0.0069	0.351	0.39	-0.039	0.973329	AT1G13960.1	WRKY DNA-binding protein 4
30188258	3	0.1032	0.3074	0.39	-0.0826	0.944354	AT2G05990.1	NAD(P)-binding Rossmann-fold superfamily protein
30188272	13	<.0001	0.46643	0.39	0.07643	1.05441	AT3G44330.1
30188287	6	0.2294	0.3984	0.39	0.0084	1.00584	AT5G16040.1	Regulator of chromosome condensation (RCC1) family protein
30188344	1	0.0639	-0.5099	0.39	-0.8999	0.535924	AT5G10770.1	Eukaryotic aspartyl protease family protein
30188370	6	<.0001	0.64707	0.39	0.25707	1.19505	AT3G07680.1	emp24/gp25L/p24 family/GOLD family protein
30188379	1	0.0982	0.3838	0.39	-0.0062	0.995712	AT2G42280.1	basic helix-loop-helix (bHLH) DNA-binding superfamily protein
30188401	3	0.1163	0.3432	0.39	-0.0468	0.968081	AT3G50520.1	Phosphoglycerate mutase family protein
30188408	10	<.0001	0.45453	0.39	0.06453	1.04574	AT1G21080.1	DNAJ heat shock N-terminal domain-containing protein
30188430	11	0.0014	0.28945	0.39	-0.10055	0.932677	AT2G31680.1	RAB GTPase homolog A5D
30188443	1	0.828	0.05035	0.39	-0.33965	0.790233	AT3G21240.1	4-coumarate:CoA ligase 2
30188451	2	0.7375	0.03924	0.39	-0.35076	0.784171	AT5G64300.1	GTP cyclohydrolase II
30188483	7	0.0017	0.31415	0.39	-0.07585	0.948783	AT2G18600.1	Ubiquitin-conjugating enzyme family protein
30188517	4	0.0121	0.4167	0.39	0.0267	1.01868	AT3G01150.1	polypyrimidine tract-binding protein 1
30188533	12	0.0001	0.31071	0.39	-0.07929	0.946523	AT5G56290.1	peroxin 5
30188542	2	0.5199	0.08708	0.39	-0.30292	0.81061	AT4G00830.2	RNA-binding (RRM/RBD/RNP motifs) family protein
30188558	1	0.2687	0.325	0.39	-0.065	0.955945	AT1G08760.1	Plant protein of unknown function (DUF936)
30188577	1	0.0018	0.51648	0.39	0.12648	1.09163	AT1G73430.2	sec34-like family protein
30188590	3	0.1869	0.2649	0.39	-0.1251	0.91694	AT5G66140.1	proteasome alpha subunit D2
30188610	4	0.7408	0.08824	0.39	-0.30176	0.811262	AT3G03190.1	glutathione S-transferase F11
30188611	3	0.0211	0.5383	0.39	0.1483	1.10826	AT1G67325.1	Ran BP2/NZF zinc finger-like superfamily protein
30188638	5	0.0189	0.3914	0.39	0.0014	1.00097	AT4G00170.1	Plant VAMP (vesicle-associated membrane protein) family protein
30188663	2	0.7616	-0.06947	0.39	-0.45947	0.727253	AT5G58330.1	lactate/malate dehydrogenase family protein
30188716	1	0.6426	-0.1233	0.39	-0.5133	0.700618	AT5G46190.1	RNA-binding KH domain-containing protein
30188726	11	<.0001	1.3272	0.39	0.9372	1.91481	AT1G31812.1	acyl-CoA-binding protein 6
30188730	2	0.0172	0.2697	0.39	-0.1203	0.919996	AT3G12640.1	RNA binding (RRM/RBD/RNP motifs) family protein
30188742	1	0.356	0.338	0.39	-0.052	0.964598	AT5G63470.2	nuclear factor Y, subunit C4
30188745	2	0.0139	0.4382	0.39	0.0482	1.03397	AT3G50700.1	indeterminate(ID)-domain 2
30188767	1	0.0035	2.1098	0.39	1.7198	3.29391	AT5G04750.1	F1F0-ATPase inhibitor protein, putative
30188857	1	0.1736	0.5445	0.39	0.1545	1.11304	AT5G04000.1
30188858	2	0.0261	0.3601	0.39	-0.0299	0.979488	AT1G56190.1	Phosphoglycerate kinase family protein
30188890	2	0.0004	0.52016	0.39	0.13016	1.09442	AT3G56100.1	meristematic receptor-like kinase
30188897	1	0.1119	0.582	0.39	0.192	1.14235	AT2G26140.1	FTSH protease 4
30188906	1	0.0737	0.721	0.39	0.331	1.25788	AT5G42180.1	Peroxidase superfamily protein
30188945	7	<.0001	0.56085	0.39	0.17085	1.12572	AT2G41770.1	Protein of unknown function (DUF288)
30188961	2	0.0023	0.4369	0.39	0.0469	1.03304	AT2G41060.2	RNA-binding (RRM/RBD/RNP motifs) family protein
30188973	1	0.1026	0.4663	0.39	0.0763	1.05431	AT1G16470.2	proteasome subunit PAB1
30189025	4	0.0546	0.5779	0.39	0.1879	1.1391	AT4G31860.1	Protein phosphatase 2C family protein
30189101	1	0.343	0.5699	0.39	0.1799	1.13281	AT5G03170.1	FASCICLIN-like arabinogalactan-protein 11
30189139	3	0.8247	-0.03913	0.39	-0.42913	0.74271	ATCG00270.1	photosystem II reaction center protein D
30189177	10	<.0001	0.5527	0.39	0.1627	1.11938	AT1G04980.1	PDI-like 2-2
30189214	2	0.0566	0.2297	0.39	-0.1603	0.894839	AT3G12640.1	RNA binding (RRM/RBD/RNP motifs) family protein
30189239	1	0.9544	0.1003	0.39	-0.2897	0.818072	AT5G03040.3	IQ-domain 2
30189287	3	<.0001	0.9135	0.39	0.5235	1.43744	AT2G44120.2	Ribosomal protein L30/L7 family protein
30189301	1	0.0883	0.5091	0.39	0.1191	1.08606	AT1G09620.1	ATP binding;leucine-tRNA ligases;aminoacyl-tRNA ligases;nucleotide binding;ATP binding;aminoacyl-tRNA ligases
30189385	1	0.0224	0.5798	0.39	0.1898	1.14061	AT1G15520.1	pleiotropic drug resistance 12
30189411	4	<.0001	0.51366	0.39	0.12366	1.0895	AT3G57540.1	Remorin family protein
30189412	1	0.1424	0.508	0.39	0.118	1.08523	AT3G54310.1
30189504	1	0.1077	0.4627	0.39	0.0727	1.05168	AT5G40760.1	glucose-6-phosphate dehydrogenase 6
30189540	1	0.2676	0.4723	0.39	0.0823	1.0587	AT3G61200.1	Thioesterase superfamily protein
30189559	3	0.0092	0.5882	0.39	0.1982	1.14727	AT2G14260.1	proline iminopeptidase
30189575	1	0.3928	0.2649	0.39	-0.1251	0.91694	AT2G46750.1	D-arabinono-1,4-lactone oxidase family protein
30189591	2	0.5164	0.136	0.39	-0.254	0.838568	AT1G60730.3	NAD(P)-linked oxidoreductase superfamily protein
30189596	4	0.0055	0.5679	0.39	0.1779	1.13124	AT3G13410.1
30189650	6	0.002	0.3625	0.39	-0.0275	0.981119	AT1G07810.1	ER-type Ca2+-ATPase 1
30189695	2	0.3291	0.1944	0.39	-0.1956	0.87321	AT4G34215.1	Domain of unknown function (DUF303)
30189739	1	0.162	0.3748	0.39	-0.0152	0.989519	AT3G05290.1	peroxisomal adenine nucleotide carrier 1
30189742	1	0.409	0.4392	0.39	0.0492	1.03469	AT5G09920.1	RNA polymerase II, Rpb4, core protein
30189762	8	<.0001	0.34821	0.39	-0.04179	0.971449	AT4G24830.1	arginosuccinate synthase family
30189942	2	0.0029	0.652	0.39	0.262	1.19914	AT5G25610.1	BURP domain-containing protein
30190022	1	0.2338	0.4859	0.39	0.0959	1.06873	AT1G11360.2	Adenine nucleotide alpha hydrolases-like superfamily protein
30190028	7	0.4455	-0.1293	0.39	-0.5193	0.69771	AT4G15940.1	Fumarylacetoacetate (FAA) hydrolase family
30190056	1	0.7797	0.1145	0.39	-0.2755	0.826164	AT3G08860.1	PYRIMIDINE 4
30190058	1	0.0602	0.3738	0.39	-0.0162	0.988834	AT2G38410.1	ENTH/VHS/GAT family protein
30190101	6	0.0048	0.29571	0.39	-0.09429	0.936733	AT1G30480.1	D111/G-patch domain-containing protein
30190130	14	<.0001	0.39102	0.39	0.00102	1.00071	AT2G37170.1	plasma membrane intrinsic protein 2
30190132	6	0.0006	0.36229	0.39	-0.02771	0.980976	AT3G11400.1	eukaryotic translation initiation factor 3G1
30190141	8	0.3154	0.1516	0.39	-0.2384	0.847685	AT1G07890.8	ascorbate peroxidase 1
30190153	1	0.1031	1.0645	0.39	0.6745	1.59604	AT4G31720.2	TBP-associated factor II 15
30190170	3	<.0001	1.0109	0.39	0.6209	1.53783	AT4G31340.1	myosin heavy chain-related
30190217	7	0.0157	0.3479	0.39	-0.0421	0.97124	AT2G39050.1	hydroxyproline-rich glycoprotein family protein
30190219	1	0.8955	0.1215	0.39	-0.2685	0.830182
30190246	5	0.0454	0.2886	0.39	-0.1014	0.932128	AT3G13224.2	RNA-binding (RRM/RBD/RNP motifs) family protein
30190258	1	0.3251	0.5822	0.39	0.1922	1.1425	AT5G40190.1	RNA ligase/cyclic nucleotide phosphodiesterase family protein
30190291	3	0.0004	0.6437	0.39	0.2537	1.19226	AT1G09620.1	ATP binding;leucine-tRNA ligases;aminoacyl-tRNA ligases;nucleotide binding;ATP binding;aminoacyl-tRNA ligases
30190307	2	0.2432	0.3231	0.39	-0.0669	0.954687	AT1G20970.1
30190313	3	0.8857	0.01668	0.39	-0.37332	0.772004	AT4G13180.1	NAD(P)-binding Rossmann-fold superfamily protein
30190341	4	0.0332	0.2882	0.39	-0.1018	0.93187	AT3G51000.1	alpha/beta-Hydrolases superfamily protein
30190353	3	0.0001	0.8682	0.39	0.4782	1.393	AT2G37040.1	PHE ammonia lyase 1
30190366	7	0.0674	0.3999	0.39	0.0099	1.00689	AT3G09820.1	adenosine kinase 1
30190373	2	0.0587	0.4968	0.39	0.1068	1.07684	AT2G36760.1	UDP-glucosyl transferase 73C2
30190422	4	0.0002	0.4489	0.39	0.0589	1.04167	AT3G06860.1	multifunctional protein 2
30190435	12	<.0001	0.33518	0.39	-0.05482	0.962715	AT5G12200.1	pyrimidine 2
30190444	2	0.2469	0.2398	0.39	-0.1502	0.901126	AT3G62760.1	Glutathione S-transferase family protein
30190455	2	0.761	0.09815	0.39	-0.29185	0.816854	AT1G79650.1	Rad23 UV excision repair protein family
30190464	6	0.0012	0.33613	0.39	-0.05387	0.963349	AT3G52750.1	Tubulin/FtsZ family protein
30190504	2	0.0516	0.3258	0.39	-0.0642	0.956476	AT1G72710.1	casein kinase 1-like protein 2
30190514	10	0.6227	0.0523	0.39	-0.3377	0.791302	AT4G37930.1	serine transhydroxymethyltransferase 1
30190529	5	<.0001	0.517	0.39	0.127	1.09202	AT4G08950.1	Phosphate-responsive 1 family protein
30190533	3	0.6597	0.09273	0.39	-0.29727	0.813791	AT2G03870.2	Small nuclear ribonucleoprotein family protein
30190575	5	<.0001	0.38909	0.39	-0.00091	0.999369	AT1G27430.1	GYF domain-containing protein
30190587	2	0.8955	-0.02552	0.39	-0.41552	0.749749	AT3G48710.1	DEK domain-containing chromatin associated protein
30190591	1	0.2027	0.3823	0.39	-0.0077	0.994677	AT1G79090.1
30190603	7	<.0001	0.38307	0.39	-0.00693	0.995208	AT2G19520.1	Transducin family protein / WD-40 repeat family protein
30190611	1	0.0069	1.2458	0.39	0.8558	1.80976	AT1G74270.1	Ribosomal protein L35Ae family protein
30190667	16	0.0003	0.26278	0.39	-0.12722	0.915594	AT5G23950.1	Calcium-dependent lipid-binding (CaLB domain) family protein
30190683	17	0.1585	0.09173	0.39	-0.29827	0.813227	AT5G49910.1	chloroplast heat shock protein 70-2
30190713	1	0.2705	0.4431	0.39	0.0531	1.03749	AT4G13400.1	2-oxoglutarate (2OG) and Fe(II)-dependent oxygenase superfamily protein
30190714	7	<.0001	0.50938	0.39	0.11938	1.08627	AT5G42080.1	dynamin-like protein
30190715	1	0.0111	0.37911	0.39	-0.01089	0.99248	AT3G54220.1	GRAS family transcription factor
30190739	11	<.0001	0.50168	0.39	0.11168	1.08049	AT5G60460.1	Preprotein translocase Sec, Sec61-beta subunit protein
30190774	1	0.3866	0.3673	0.39	-0.0227	0.984389	AT3G62160.1	HXXXD-type acyl-transferase family protein
30190780	1	0.1052	0.4015	0.39	0.0115	1.008	AT1G11360.3	Adenine nucleotide alpha hydrolases-like superfamily protein
30190822	1	0.9677	-0.06047	0.39	-0.45047	0.731804	AT1G30580.1	GTP binding
30190823	6	0.0011	0.34988	0.39	-0.04012	0.972574	AT1G56190.1	Phosphoglycerate kinase family protein
30190858	6	0.0401	0.3316	0.39	-0.0584	0.960329	AT5G57850.1	D-aminoacid aminotransferase-like PLP-dependent enzymes superfamily protein
30190876	7	<.0001	0.67225	0.39	0.28225	1.21609	AT5G26710.1	Glutamyl/glutaminyl-tRNA synthetase, class Ic
30190884	2	0.0535	0.3159	0.39	-0.0741	0.949935	AT2G19590.1	ACC oxidase 1
30190908	9	0.1918	0.2411	0.39	-0.1489	0.901938	AT5G17990.1	tryptophan biosynthesis 1
30190971	2	0.0837	0.5234	0.39	0.1334	1.09688	AT3G54470.1	uridine 5\'-monophosphate synthase / UMP synthase (PYRE-F) (UMPS)
30190982	1	0.2701	0.4071	0.39	0.0171	1.01192	AT4G35987.1	S-adenosyl-L-methionine-dependent methyltransferases superfamily protein
30190984	2	0.1183	0.3073	0.39	-0.0827	0.944289	AT4G38660.1	Pathogenesis-related thaumatin superfamily protein
30190986	3	0.0356	0.4386	0.39	0.0486	1.03426	AT5G06580.1	FAD-linked oxidases family protein
30191049	1	0.1135	0.6521	0.39	0.2621	1.19922	AT1G02816.1	Protein of unknown function, DUF538
30191141	33	<.0001	0.25854	0.39	-0.13146	0.912907	AT3G17390.1	S-adenosylmethionine synthetase family protein
30191166	2	0.5667	0.1442	0.39	-0.2458	0.843348	AT3G51980.1	ARM repeat superfamily protein
30191185	2	0.5548	0.2737	0.39	-0.1163	0.922551	AT5G42890.1	sterol carrier protein 2
30191191	20	0.0008	0.3472	0.39	-0.0428	0.970769	AT5G13110.1	glucose-6-phosphate dehydrogenase 2
30191211	2	0.4366	0.2243	0.39	-0.1657	0.891496	AT3G47520.1	malate dehydrogenase
30191258	4	0.003	0.3765	0.39	-0.0135	0.990686	AT2G24580.1	FAD-dependent oxidoreductase family protein
30191271	1	0.1445	0.4386	0.39	0.0486	1.03426	AT2G42520.1	P-loop containing nucleoside triphosphate hydrolases superfamily protein
30191351	1	0.1222	0.6526	0.39	0.2626	1.19964	AT2G33845.1	Nucleic acid-binding, OB-fold-like protein
30191401	4	0.0337	0.361	0.39	-0.029	0.980099	AT2G15780.1	Cupredoxin superfamily protein
30191424	2	0.0604	0.3222	0.39	-0.0678	0.954092	AT3G18180.1	Glycosyltransferase family 61 protein
30191428	4	<.0001	0.48528	0.39	0.09528	1.06827	AT4G31580.1	serine/arginine-rich 22
30191431	1	0.2932	0.4809	0.39	0.0909	1.06503	AT2G35190.1	novel plant snare 11
30191454	4	0.0003	0.4477	0.39	0.0577	1.04081	AT1G65480.1	PEBP (phosphatidylethanolamine-binding protein) family protein
30191457	16	0.4482	0.06655	0.39	-0.32345	0.799157	AT2G40300.1	ferritin 4
30191491	21	<.0001	0.37331	0.39	-0.01669	0.988498	AT5G65020.1	annexin 2
30191504	4	0.0859	0.36	0.39	-0.03	0.97942	AT2G19480.3	nucleosome assembly protein 1;2
30191515	1	0.7145	0.175	0.39	-0.215	0.861546	AT5G44730.1	Haloacid dehalogenase-like hydrolase (HAD) superfamily protein
30191532	14	0.005	0.372	0.39	-0.018	0.987601	AT3G45030.1	Ribosomal protein S10p/S20e family protein
30191557	4	0.1111	0.3436	0.39	-0.0464	0.96835	AT1G53280.1	Class I glutamine amidotransferase-like superfamily protein
30191561	5	0.0017	0.33463	0.39	-0.05537	0.962348	AT1G26110.1	decapping 5
30191564	4	0.0015	0.596	0.39	0.206	1.15349	AT3G43190.1	sucrose synthase 4
30191590	1	0.5602	-0.1886	0.39	-0.5786	0.669613	AT1G70670.1	Caleosin-related family protein
30191596	1	0.0423	0.9123	0.39	0.5223	1.43624	AT2G19160.1	Core-2/I-branching beta-1,6-N-acetylglucosaminyltransferase family protein
30191644	5	0.0005	0.4906	0.39	0.1006	1.07222	AT5G19300.1
30191651	4	0.0194	0.3886	0.39	-0.0014	0.99903	AT3G20290.1	EPS15 homology domain 1
30191658	2	0.0905	0.4209	0.39	0.0309	1.02165	AT1G70670.1	Caleosin-related family protein
30191666	2	0.0001	0.45672	0.39	0.06672	1.04733	AT3G46920.1	Protein kinase superfamily protein with octicosapeptide/Phox/Bem1p domain
30191674	3	0.005	0.27013	0.39	-0.11987	0.920271	AT1G30900.1	VACUOLAR SORTING RECEPTOR 6
30191699	2	0.0007	0.48556	0.39	0.09556	1.06848
30191704	2	0.1009	1.0391	0.39	0.6491	1.56819	AT1G05205.1
30191706	2	0.055	0.5074	0.39	0.1174	1.08478	AT5G19485.1	transferases;nucleotidyltransferases
30191765	3	0.0241	0.3583	0.39	-0.0317	0.978267	AT5G24840.1	tRNA (guanine-N-7) methyltransferase
30191766	3	0.0075	0.7228	0.39	0.3328	1.25946	AT4G32690.1	hemoglobin 3
30191805	18	0.0008	0.3662	0.39	-0.0238	0.983638	AT3G52580.1	Ribosomal protein S11 family protein
30191828	1	0.6232	0.5249	0.39	0.1349	1.09802	AT1G22330.1	RNA-binding (RRM/RBD/RNP motifs) family protein
30191861	1	0.082	0.5494	0.39	0.1594	1.11682	AT2G33590.1	NAD(P)-binding Rossmann-fold superfamily protein
30191872	10	0.0005	0.34417	0.39	-0.04583	0.968732	AT3G50210.3	2-oxoglutarate (2OG) and Fe(II)-dependent oxygenase superfamily protein
30191887	4	0.0001	0.4867	0.39	0.0967	1.06932	AT3G60880.2	dihydrodipicolinate synthase 1
30191907	3	0.0006	0.5808	0.39	0.1908	1.1414	AT2G26040.1	PYR1-like 2
30191930	1	0.5195	0.5145	0.39	0.1245	1.09013	AT5G17560.1	BolA-like family protein
30191934	4	<.0001	1.0174	0.39	0.6274	1.54478	AT5G67490.1
30191959	4	0.0005	0.4364	0.39	0.0464	1.03268	AT5G38470.1	Rad23 UV excision repair protein family
30191968	1	0.3678	0.947	0.39	0.557	1.47121	AT4G12420.1	Cupredoxin superfamily protein
30192014	2	0.1506	0.3783	0.39	-0.0117	0.991923	AT1G01170.1	Protein of unknown function (DUF1138)
30192088	2	0.2528	0.3405	0.39	-0.0495	0.966271	AT2G43360.1	Radical SAM superfamily protein
30192104	2	<.0001	1.5842	0.39	1.1942	2.28818	AT4G29390.1	Ribosomal protein S30 family protein
30192161	2	0.0667	0.8858	0.39	0.4958	1.4101	AT1G72230.1	Cupredoxin superfamily protein
30192170	1	0.8929	0.1176	0.39	-0.2724	0.827941	AT5G42890.1	sterol carrier protein 2
30192183	2	0.4606	0.5174	0.39	0.1274	1.09232	AT5G20500.1	Glutaredoxin family protein
30192193	1	0.5854	-0.2469	0.39	-0.6369	0.643093	AT3G18035.1	winged-helix DNA-binding transcription factor family protein
30192227	1	0.2206	0.3665	0.39	-0.0235	0.983843	AT5G14720.1	Protein kinase superfamily protein
30192228	4	0.7758	0.03021	0.39	-0.35979	0.779278	AT5G11720.1	Glycosyl hydrolases family 31 protein
30192244	1	0.0311	0.8496	0.39	0.4596	1.37516	AT1G15690.1	Inorganic H pyrophosphatase family protein
30192247	1	0.5366	0.1958	0.39	-0.1942	0.874057	AT2G34630.1	geranyl diphosphate synthase 1
30192280	2	0.0036	0.762	0.39	0.372	1.29415	AT1G74270.1	Ribosomal protein L35Ae family protein
30192281	2	0.0214	0.2977	0.39	-0.0923	0.938026	AT1G49590.1	C2H2 and C2HC zinc fingers superfamily protein
30192296	3	0.1308	0.2991	0.39	-0.0909	0.938937	AT1G21320.2	nucleotide binding;nucleic acid binding
30192315	2	0.0014	0.5054	0.39	0.1154	1.08328	AT5G10240.1	asparagine synthetase 3
30192355	1	0.2357	0.536	0.39	0.146	1.1065	AT5G50430.1	ubiquitin-conjugating enzyme 33
30192387	8	0.0002	0.39979	0.39	0.00979	1.00681	AT1G17720.2	Protein phosphatase 2A, regulatory subunit PR55
30192393	2	0.1556	0.2667	0.39	-0.1233	0.918085	AT5G20070.1	nudix hydrolase homolog 19
30192408	15	<.0001	0.62886	0.39	0.23886	1.18006	AT5G07220.1	BCL-2-associated athanogene 3
30192409	3	0.1575	0.5274	0.39	0.1374	1.09992	AT2G04690.1	Pyridoxamine 5\'-phosphate oxidase family protein
30192433	1	0.1954	1.2366	0.39	0.8466	1.79826	AT4G19600.1	Cyclin family protein
30192442	2	0.0536	0.3316	0.39	-0.0584	0.960329	AT2G07180.1	Protein kinase superfamily protein
30192453	1	0.6268	0.1345	0.39	-0.2555	0.837697	AT5G54440.1	CLUB
30192467	14	<.0001	0.44114	0.39	0.05114	1.03608	AT5G56600.1	profilin 3
30192478	86	<.0001	0.52782	0.39	0.13782	1.10024	AT2G36530.1	Enolase
30192483	1	0.0012	0.8472	0.39	0.4572	1.37287	AT5G45910.1	GDSL-like Lipase/Acylhydrolase superfamily protein
30192494	3	0.4308	0.3237	0.39	-0.0663	0.955084	AT3G13772.1	transmembrane nine 7
30192498	1	0.1152	0.2805	0.39	-0.1095	0.926909	AT3G15980.4	Coatomer, beta\' subunit
30192515	5	0.8062	0.08162	0.39	-0.30838	0.807548	AT3G48140.1	B12D protein
30192539	2	0.1062	0.5451	0.39	0.1551	1.1135	AT2G33430.1	differentiation and greening-like 1
30192544	1	0.024	0.5463	0.39	0.1563	1.11443	AT5G19485.1	transferases;nucleotidyltransferases
30192554	6	0.0674	0.3099	0.39	-0.0801	0.945992	AT1G24510.1	TCP-1/cpn60 chaperonin family protein
30192575	1	0.3137	0.2857	0.39	-0.1043	0.930256	AT2G01660.1	plasmodesmata-located protein 6
30192586	2	0.2658	0.2486	0.39	-0.1414	0.906639	AT3G12685.1	Acid phosphatase/vanadium-dependent haloperoxidase-related protein
30192597	1	0.0336	0.6624	0.39	0.2724	1.20782	AT5G36210.1	alpha/beta-Hydrolases superfamily protein
30192598	4	0.061	0.2428	0.39	-0.1472	0.903001	AT5G14780.1	formate dehydrogenase
30192607	2	0.0004	0.8438	0.39	0.4538	1.36964	AT2G26640.1	3-ketoacyl-CoA synthase 11
30192613	1	0.2225	0.3258	0.39	-0.0642	0.956476	AT1G08490.1	chloroplastic NIFS-like cysteine desulfurase
30192625	2	0.9732	0.008617	0.39	-0.381383	0.767701	AT1G53670.1	methionine sulfoxide reductase B 1
30192629	1	0.0472	0.5794	0.39	0.1894	1.14029	AT1G70370.2	polygalacturonase 2
30192728	43	<.0001	0.49115	0.39	0.10115	1.07263	AT5G39570.1
30192740	1	0.0792	0.3859	0.39	-0.0041	0.997162	AT4G23180.1	cysteine-rich RLK (RECEPTOR-like protein kinase) 10
30192741	1	0.0263	0.5878	0.39	0.1978	1.14695	AT4G26550.1	Got1/Sft2-like vescicle transport protein family
30192743	1	0.5063	0.2656	0.39	-0.1244	0.917385	AT1G29400.2	MEI2-like protein 5
30192769	1	0.3137	0.2657	0.39	-0.1243	0.917449	AT2G25620.1	DNA-binding protein phosphatase 1
30192796	1	0.1585	0.7346	0.39	0.3446	1.2698	AT3G24503.1	aldehyde dehydrogenase 2C4
30192799	1	0.8598	0.05226	0.39	-0.33774	0.79128	AT5G37530.1	NAD(P)-binding Rossmann-fold superfamily protein
30192808	1	0.1116	0.2847	0.39	-0.1053	0.929612	AT1G76550.1	Phosphofructokinase family protein
30192817	2	0.3873	0.1877	0.39	-0.2023	0.869164	AT3G59760.1	O-acetylserine (thiol) lyase isoform C
30192822	7	0.0489	0.211	0.39	-0.179	0.883315	AT3G13470.1	TCP-1/cpn60 chaperonin family protein
30192823	2	0.0438	0.5138	0.39	0.1238	1.0896	AT3G59600.1	RNA polymerase Rpb8
30192897	1	0.4507	0.179	0.39	-0.211	0.863938	AT1G31812.1	acyl-CoA-binding protein 6
30192916	1	0.1024	0.3981	0.39	0.0081	1.00563	AT3G50220.1	Protein of unknown function (DUF579)
30192925	13	<.0001	0.38563	0.39	-0.00437	0.996976	ATMG00560.1	Nucleic acid-binding, OB-fold-like protein
30192930	3	0.1217	0.2029	0.39	-0.1871	0.87837	AT4G30170.1	Peroxidase family protein
30192931	3	0.0244	0.3781	0.39	-0.0119	0.991785	AT3G16090.1	RING/U-box superfamily protein
30192948	5	0.0136	0.3739	0.39	-0.0161	0.988902	AT2G18030.1	Peptide methionine sulfoxide reductase family protein
30192950	5	0.0021	0.3447	0.39	-0.0453	0.969088	AT4G00250.1	DNA-binding storekeeper protein-related transcriptional regulator
30192983	1	0.1046	0.2975	0.39	-0.0925	0.937896	AT5G60580.3	RING/U-box superfamily protein
30192989	1	0.1864	0.3349	0.39	-0.0551	0.962528	AT5G47650.1	nudix hydrolase homolog 2
30192995	12	<.0001	0.51674	0.39	0.12674	1.09182	AT1G12000.1	Phosphofructokinase family protein
30193002	2	0.9822	-0.01208	0.39	-0.40208	0.756766	AT5G14420.3	RING domain ligase2
30193018	1	0.0395	0.561	0.39	0.171	1.12584	AT1G74460.1	GDSL-like Lipase/Acylhydrolase superfamily protein
30193020	1	0.2163	0.457	0.39	0.067	1.04754	AT2G19080.1	metaxin-related
30193025	3	0.1537	0.2512	0.39	-0.1388	0.908274	AT2G35010.2	thioredoxin O1
30193034	5	0.0018	0.33098	0.39	-0.05902	0.959916	AT5G20200.1	nucleoporin-related
30193057	26	<.0001	0.38807	0.39	-0.00193	0.998663	AT1G59610.1	dynamin-like 3
30193058	4	0.5514	0.0849	0.39	-0.3051	0.809386	AT2G38740.1	Haloacid dehalogenase-like hydrolase (HAD) superfamily protein
30193086	1	0.0032	0.6446	0.39	0.2546	1.193	AT4G30160.2	villin 4
30193089	2	0.0006	0.5803	0.39	0.1903	1.141	AT1G76940.1	RNA-binding (RRM/RBD/RNP motifs) family protein
30193093	3	0.0812	0.3525	0.39	-0.0375	0.974342	AT1G20030.2	Pathogenesis-related thaumatin superfamily protein
30193119	1	0.241	0.5199	0.39	0.1299	1.09422	AT2G21940.4	shikimate kinase 1
30193134	1	0.13	0.4665	0.39	0.0765	1.05446	AT5G12950.1	Putative glycosyl hydrolase of unknown function (DUF1680)
30193147	1	0.2249	0.3665	0.39	-0.0235	0.983843	AT2G24170.1	Endomembrane protein 70 protein family
30193188	6	<.0001	0.7006	0.39	0.3106	1.24022	AT4G20820.1	FAD-binding Berberine family protein
30193273	1	0.3575	0.4058	0.39	0.0158	1.01101	AT5G24020.1	septum site-determining protein (MIND)
30193286	5	0.0001	0.6031	0.39	0.2131	1.15918	AT1G01800.1	NAD(P)-binding Rossmann-fold superfamily protein
30193315	1	0.1506	0.7858	0.39	0.3958	1.31567	AT1G09580.1	emp24/gp25L/p24 family/GOLD family protein
30193335	6	0.0068	0.3153	0.39	-0.0747	0.94954	AT2G36250.1	Tubulin/FtsZ family protein
30193340	3	0.0949	0.3819	0.39	-0.0081	0.994401	AT4G13360.1	ATP-dependent caseinolytic (Clp) protease/crotonase family protein
30193345	15	0.0007	0.24408	0.39	-0.14592	0.903803	AT2G45290.1	Transketolase
30193365	1	0.0478	1.1303	0.39	0.7403	1.67052	AT1G15270.1	Translation machinery associated TMA7
30193459	1	0.9731	-0.01115	0.39	-0.40115	0.757254	AT1G53720.1	cyclophilin 59
30193464	3	0.0002	0.7517	0.39	0.3617	1.28494	AT4G32330.1	TPX2 (targeting protein for Xklp2) protein family
30193491	2	<.0001	0.59205	0.39	0.20205	1.15033	AT3G13750.1	beta galactosidase 1
30193547	1	0.0794	0.9827	0.39	0.5927	1.50807	AT1G60070.1	Adaptor protein complex AP-1, gamma subunit
30193558	9	0.0106	0.26058	0.39	-0.12942	0.914199	AT5G34850.1	purple acid phosphatase 26
30193562	1	0.7358	0.1772	0.39	-0.2128	0.862861	AT1G23800.1	aldehyde dehydrogenase 2B7
30193575	3	0.5837	-0.1448	0.39	-0.5348	0.690254	AT5G38840.1	SMAD/FHA domain-containing protein
30193584	12	0.0018	0.22206	0.39	-0.16794	0.890113	AT2G27100.1	C2H2 zinc-finger protein SERRATE (SE)
30193631	1	0.1593	0.4577	0.39	0.0677	1.04804	AT5G10750.1	Protein of unknown function (DUF1336)
30193652	1	0.8645	-0.04918	0.39	-0.43918	0.737554	AT1G11660.1	heat shock protein 70 (Hsp 70) family protein
30193683	7	0.0046	0.3395	0.39	-0.0505	0.965602	AT1G27480.1	alpha/beta-Hydrolases superfamily protein
30193703	1	0.4885	0.2188	0.39	-0.1712	0.888104	AT2G18980.1	Peroxidase superfamily protein
30193716	1	0.5572	0.2182	0.39	-0.1718	0.887734	AT2G26670.1	Plant haem oxygenase (decyclizing) family protein
30193730	5	0.0092	0.4529	0.39	0.0629	1.04456	AT3G57050.1	cystathionine beta-lyase
30193736	1	0.6589	0.101	0.39	-0.289	0.818469	AT5G54080.1	homogentisate 1,2-dioxygenase
30193755	1	0.0372	0.6999	0.39	0.3099	1.23962	AT3G57930.2
30193758	1	0.4122	0.355	0.39	-0.035	0.976032	AT5G62560.1	RING/U-box superfamily protein with ARM repeat domain
30193762	2	0.0464	0.4876	0.39	0.0976	1.06999	AT5G53400.1	HSP20-like chaperones superfamily protein
30193782	2	0.2912	0.2826	0.39	-0.1074	0.928259	AT5G37670.1	HSP20-like chaperones superfamily protein
30193790	5	0.0034	0.4286	0.39	0.0386	1.02712	AT1G05260.1	Peroxidase superfamily protein
30193803	9	<.0001	0.6856	0.39	0.2956	1.2274	AT1G05260.1	Peroxidase superfamily protein
30193808	1	0.3528	0.2698	0.39	-0.1202	0.92006	AT4G15550.1	indole-3-acetate beta-D-glucosyltransferase
30193812	9	<.0001	0.5496	0.39	0.1596	1.11698	AT5G05340.1	Peroxidase superfamily protein
30193825	5	0.1177	0.5303	0.39	0.1403	1.10213	AT5G65260.1	RNA-binding (RRM/RBD/RNP motifs) family protein
30193830	6	0.0036	0.8752	0.39	0.4852	1.39978	AT1G48160.1	signal recognition particle 19 kDa protein, putative / SRP19, putative
30193839	2	<.0001	0.57521	0.39	0.18521	1.13698	AT5G25610.1	BURP domain-containing protein
30193847	2	0.0002	0.925	0.39	0.535	1.44894	AT1G53645.1	hydroxyproline-rich glycoprotein family protein
30193875	1	0.276	0.3631	0.39	-0.0269	0.981527	AT1G77140.1	vacuolar protein sorting 45
30193896	2	0.019	0.5673	0.39	0.1773	1.13077	AT2G25310.1	Protein of unknown function (DUF2012)
30193903	2	0.1471	0.4431	0.39	0.0531	1.03749	AT1G68850.1	Peroxidase superfamily protein
30193904	2	0.0098	0.5505	0.39	0.1605	1.11767	AT3G08600.1	Protein of unknown function (DUF1191)
30193909	8	0.0007	0.33797	0.39	-0.05203	0.964578	AT1G01950.1	armadillo repeat kinesin 2
30193912	3	0.0261	0.4717	0.39	0.0817	1.05826	AT3G21240.1	4-coumarate:CoA ligase 2
30193931	4	0.0153	0.3435	0.39	-0.0465	0.968283	AT2G22125.1	binding
30193936	1	0.1479	0.4955	0.39	0.1055	1.07587	AT1G14520.1	myo-inositol oxygenase 1
30193939	1	0.4292	0.437	0.39	0.047	1.03311	AT1G17890.1	NAD(P)-binding Rossmann-fold superfamily protein
30193942	2	0.0633	0.3175	0.39	-0.0725	0.950989	AT4G01560.1	Ribosomal RNA processing Brix domain protein
30193985	5	<.0001	0.4774	0.39	0.0874	1.06245	AT2G17420.1	NADPH-dependent thioredoxin reductase A
30193987	1	0.0434	0.6299	0.39	0.2399	1.18091	AT5G09250.1	ssDNA-binding transcriptional regulator
30194061	4	0.2891	0.2032	0.39	-0.1868	0.878552	AT3G59760.1	O-acetylserine (thiol) lyase isoform C
30194067	3	0.0077	0.5702	0.39	0.1802	1.13304	AT2G34160.1	Alba DNA/RNA-binding protein
30194075	3	0.0634	0.3376	0.39	-0.0524	0.964331	AT2G30950.1	FtsH extracellular protease family
30194082	1	0.0794	0.5685	0.39	0.1785	1.13171	AT2G36800.1	don-glucosyltransferase 1
30194088	24	0.7925	-0.01822	0.39	-0.40822	0.753553	AT5G38530.1	tryptophan synthase beta type 2
30194104	1	0.0336	0.4519	0.39	0.0619	1.04384	AT1G30680.1	toprim domain-containing protein
30194106	1	0.1895	0.5724	0.39	0.1824	1.13477	AT3G57890.1	Tubulin binding cofactor C domain-containing protein
30194112	4	<.0001	0.41431	0.39	0.02431	1.01699	AT1G16670.1	Protein kinase superfamily protein
30194124	3	0.1581	0.2421	0.39	-0.1479	0.902563	AT2G46950.1	cytochrome P450, family 709, subfamily B, polypeptide 2
30194127	4	0.0209	0.3222	0.39	-0.0678	0.954092	AT5G13030.1
30194169	1	0.0598	0.5698	0.39	0.1798	1.13273	AT3G61540.1	alpha/beta-Hydrolases superfamily protein
30194187	3	0.5946	0.1463	0.39	-0.2437	0.844576	AT1G14620.1	decoy
30194189	3	0.5657	0.1435	0.39	-0.2465	0.842939	AT2G35390.2	Phosphoribosyltransferase family protein
30194213	1	0.4864	0.3054	0.39	-0.0846	0.943046	AT4G23850.1	AMP-dependent synthetase and ligase family protein
30194215	2	0.3283	0.4385	0.39	0.0485	1.03419	AT1G31340.1	related to ubiquitin 1
30194231	2	0.1021	0.4209	0.39	0.0309	1.02165	AT2G04550.1	indole-3-butyric acid response 5
30194256	5	0.0586	0.393	0.39	0.003	1.00208	AT1G01710.1	Acyl-CoA thioesterase family protein
30194266	2	0.2155	-0.1964	0.39	-0.5864	0.666003	AT1G06680.1	photosystem II subunit P-1
30194269	23	<.0001	0.39319	0.39	0.00319	1.00221	AT3G02540.1	Rad23 UV excision repair protein family
30194276	42	<.0001	-0.48071	0.39	-0.87071	0.546878	AT5G43060.1	Granulin repeat cysteine protease family protein
30194286	1	0.3938	0.3826	0.39	-0.0074	0.994884	AT1G28210.2	DNAJ heat shock family protein
30194329	2	0.0883	0.5223	0.39	0.1323	1.09604	AT1G06290.1	acyl-CoA oxidase 3
30194355	2	0.6409	0.07624	0.39	-0.31376	0.804542	AT5G53060.1	RNA-binding KH domain-containing protein
30194375	3	0.0005	0.4612	0.39	0.0712	1.05059	AT5G53120.3	spermidine synthase 3
30194379	1	0.509	0.2989	0.39	-0.0911	0.938807	AT4G37880.1	LisH/CRA/RING-U-box domains-containing protein
30194396	4	0.0007	0.4268	0.39	0.0368	1.02584	AT5G66420.2
30194427	7	0.0046	0.3085	0.39	-0.0815	0.945075	AT5G20720.2	chaperonin 20
30194433	4	0.0103	0.3281	0.39	-0.0619	0.958002	AT2G45300.1	RNA 3\'-terminal phosphate cyclase/enolpyruvate transferase, alpha/beta
30194442	1	0.0133	0.5709	0.39	0.1809	1.13359	AT5G39900.1	Small GTP-binding protein
30194470	1	0.2529	0.3668	0.39	-0.0232	0.984048	AT4G25720.1	glutaminyl cyclase
30194478	1	0.0051	0.8037	0.39	0.4137	1.3321	AT1G15690.1	Inorganic H pyrophosphatase family protein
30194514	1	0.0727	0.4649	0.39	0.0749	1.05329	AT2G34790.1	FAD-binding Berberine family protein
30194518	3	0.2345	0.5074	0.39	0.1174	1.08478	AT5G53330.1	Ubiquitin-associated/translation elongation factor EF1B protein
30194539	2	0.0157	1.1617	0.39	0.7717	1.70728	AT3G49100.1	Signal recognition particle, SRP9/SRP14 subunit
30194558	2	<.0001	0.87469	0.39	0.48469	1.39929	AT1G76160.1	SKU5 similar 5
30194578	9	0.0083	0.2983	0.39	-0.0917	0.938416	AT1G03230.1	Eukaryotic aspartyl protease family protein
30194580	1	0.0002	1.18907	0.39	0.79907	1.73998	AT3G25140.1	Nucleotide-diphospho-sugar transferases superfamily protein
30194587	1	0.0262	0.3713	0.39	-0.0187	0.987122	AT4G00910.1	Aluminium activated malate transporter family protein
30194588	2	0.2198	0.3178	0.39	-0.0722	0.951186	AT1G53650.2	CTC-interacting domain 8
30194598	4	<.0001	0.6262	0.39	0.2362	1.17789	AT3G13990.2	Kinase-related protein of unknown function (DUF1296)
30194606	2	0.4726	0.2179	0.39	-0.1721	0.88755	AT4G33350.2	Tic22-like family protein
30194633	2	0.2198	0.2806	0.39	-0.1094	0.926973	AT4G38800.1	methylthioadenosine nucleosidase 1
30194644	8	<.0001	0.37552	0.39	-0.01448	0.990013	AT3G13290.1	varicose-related
30194663	2	0.4945	0.1311	0.39	-0.2589	0.835725	AT1G10200.1	GATA type zinc finger transcription factor family protein
30194675	3	0.0037	0.6902	0.39	0.3002	1.23132	AT3G22590.1	PLANT HOMOLOGOUS TO PARAFIBROMIN
30194688	3	0.0702	0.427	0.39	0.037	1.02598	AT4G29260.1	HAD superfamily, subfamily IIIB acid phosphatase
30194706	4	<.0001	0.5913	0.39	0.2013	1.14973	AT1G18270.2	ketose-bisphosphate aldolase class-II family protein
30194715	3	0.2338	-0.1271	0.39	-0.5171	0.698775	AT5G51430.1	conserved oligomeric Golgi complex component-related / COG complex component-related
30194734	2	0.9719	-0.01075	0.39	-0.40075	0.757464	AT2G47730.1	glutathione S-transferase phi 8
30194740	1	0.2494	0.5054	0.39	0.1154	1.08328	AT4G38240.1	alpha-1,3-mannosyl-glycoprotein beta-1,2-N-acetylglucosaminyltransferase, putative
30194828	4	0.0607	0.2594	0.39	-0.1306	0.913451	AT1G15950.1	cinnamoyl coa reductase 1
30194891	1	0.0136	0.83	0.39	0.44	1.3566	AT1G15340.1	methyl-CPG-binding domain 10
30194920	12	<.0001	0.48616	0.39	0.09616	1.06892	AT4G31990.2	aspartate aminotransferase 5
30194947	1	0.591	-0.8743	0.39	-1.2643	0.416301	AT3G25800.1	protein phosphatase 2A subunit A2
30194999	1	0.338	0.412	0.39	0.022	1.01537	AT5G53900.2	Serine/threonine-protein kinase WNK (With No Lysine)-related
30195084	1	0.2486	0.3423	0.39	-0.0477	0.967477	AT3G53140.1	O-methyltransferase family protein
30195091	2	0.4857	0.1975	0.39	-0.1925	0.875088	AT1G10310.1	NAD(P)-binding Rossmann-fold superfamily protein
30195162	2	0.5685	0.1366	0.39	-0.2534	0.838917	AT1G48320.1	Thioesterase superfamily protein
30195237	7	0.0076	0.4454	0.39	0.0554	1.03915	AT1G09640.1	Translation elongation factor EF1B, gamma chain
30195250	4	<.0001	0.815	0.39	0.425	1.34257	AT5G43940.2	GroES-like zinc-binding dehydrogenase family protein
30195280	3	0.0057	0.9785	0.39	0.5885	1.50368	AT1G10940.1	Protein kinase superfamily protein
30195318	5	0.0166	0.5646	0.39	0.1746	1.12865	AT5G27470.1	seryl-tRNA synthetase / serine--tRNA ligase
30195347	4	0.4866	0.1545	0.39	-0.2355	0.849391	AT1G09740.1	Adenine nucleotide alpha hydrolases-like superfamily protein
30195348	5	0.2008	0.2335	0.39	-0.1565	0.897199	AT5G64350.1	FK506-binding protein 12
30195360	1	0.0494	0.6373	0.39	0.2473	1.18698	AT1G14000.1	VH1-interacting kinase
30195394	1	0.1302	0.5121	0.39	0.1221	1.08832	AT3G59630.1	diphthamide synthesis DPH2 family protein
30195400	16	0.0002	0.38906	0.39	-0.00094	0.999349	AT1G07890.7	ascorbate peroxidase 1
30195433	7	0.0139	0.4267	0.39	0.0367	1.02576	AT1G14000.1	VH1-interacting kinase
30195435	1	0.0317	0.5587	0.39	0.1687	1.12405
30195439	5	0.0236	0.7025	0.39	0.3125	1.24186	AT2G38870.1	Serine protease inhibitor, potato inhibitor I-type family protein
30195440	11	<.0001	0.4877	0.39	0.0977	1.07007	AT2G32720.1	cytochrome B5 isoform B
30195446	2	0.3977	0.3707	0.39	-0.0193	0.986711	AT2G38870.1	Serine protease inhibitor, potato inhibitor I-type family protein
30195456	1	0.082	0.5663	0.39	0.1763	1.12998	AT5G14530.1	Transducin/WD40 repeat-like superfamily protein
30195468	1	0.9597	-0.05341	0.39	-0.44341	0.735394	AT3G46060.1	RAB GTPase homolog 8A
30195492	3	0.0354	0.3487	0.39	-0.0413	0.971779	AT3G06350.1	dehydroquinate dehydratase, putative / shikimate dehydrogenase, putative
30195549	22	<.0001	0.42644	0.39	0.03644	1.02558	AT3G06350.1	dehydroquinate dehydratase, putative / shikimate dehydrogenase, putative
30195555	1	0.1661	0.2962	0.39	-0.0938	0.937051	AT3G47120.1	RNA recognition motif (RRM)-containing protein
30195580	1	0.044	0.23702	0.39	-0.15298	0.899391	AT2G15790.1	peptidyl-prolyl cis-trans isomerase / cyclophilin-40 (CYP40) / rotamase
30195600	1	0.9544	0.005748	0.39	-0.384252	0.766176	AT2G42450.1	alpha/beta-Hydrolases superfamily protein
30195603	1	0.2264	0.3562	0.39	-0.0338	0.976844	AT1G03940.1	HXXXD-type acyl-transferase family protein
30195650	1	0.0012	0.6895	0.39	0.2995	1.23072	AT5G23490.1
30195656	9	<.0001	0.5051	0.39	0.1151	1.08305	AT1G74050.1	Ribosomal protein L6 family protein
30195685	8	<.0001	0.55638	0.39	0.16638	1.12224	AT5G08680.1	ATP synthase alpha/beta family protein
30195691	2	0.239	0.2303	0.39	-0.1597	0.895211	AT3G48730.1	glutamate-1-semialdehyde 2,1-aminomutase 2
30195713	5	0.006	0.4537	0.39	0.0637	1.04514	AT5G64160.1
30195720	4	0.0597	0.2571	0.39	-0.1329	0.911996	AT5G46070.1	Guanylate-binding family protein
30195741	8	0.0009	0.34343	0.39	-0.04657	0.968236	AT2G32910.1	DCD (Development and Cell Death) domain protein
30195769	1	0.1262	0.5132	0.39	0.1232	1.08915	AT4G38890.1	FMN-linked oxidoreductases superfamily protein
30195827	7	0.0108	0.3579	0.39	-0.0321	0.977996	AT5G40650.1	succinate dehydrogenase 2-2
30195831	3	0.0033	0.5208	0.39	0.1308	1.0949	AT2G37090.1	Nucleotide-diphospho-sugar transferases superfamily protein
30195835	1	0.6202	0.08339	0.39	-0.30661	0.808539	AT3G57560.1	N-acetyl-l-glutamate kinase
30195872	6	<.0001	0.62437	0.39	0.23437	1.17639	AT3G02760.1	Class II aaRS and biotin synthetases superfamily protein
30195873	23	<.0001	0.36388	0.39	-0.02612	0.982058	AT3G12290.1	Amino acid dehydrogenase family protein
30195916	4	0.3681	0.1414	0.39	-0.2486	0.841713	AT5G64570.1	beta-D-xylosidase 4
30195944	3	0.0982	0.2911	0.39	-0.0989	0.933745	AT1G13750.1	Purple acid phosphatases superfamily protein
30196002	1	0.4361	0.1985	0.39	-0.1915	0.875695	AT2G40490.1	Uroporphyrinogen decarboxylase
30196005	2	0.0305	0.3519	0.39	-0.0381	0.973937	AT1G17370.1	oligouridylate binding protein 1B
30196025	1	0.5431	0.1653	0.39	-0.2247	0.855773	AT5G19740.1	Peptidase M28 family protein
30196035	1	0.0648	1.0052	0.39	0.6152	1.53177	AT3G20650.1	mRNA capping enzyme family protein
30196067	16	<.0001	0.9761	0.39	0.5861	1.50118	AT1G62660.1	Glycosyl hydrolases family 32 protein
30196086	13	0.1336	0.07354	0.39	-0.31646	0.803038	AT5G13520.1	peptidase M1 family protein
30196118	1	0.62	0.4738	0.39	0.0838	1.05981
30196159	3	0.0067	0.3749	0.39	-0.0151	0.989588	AT2G17840.1	Senescence/dehydration-associated protein-related
30196357	10	<.0001	0.49372	0.39	0.10372	1.07454	AT3G56630.1	cytochrome P450, family 94, subfamily D, polypeptide 2
30196431	1	0.3009	0.3561	0.39	-0.0339	0.976776	AT2G01290.1	ribose-5-phosphate isomerase 2
30196457	1	0.0917	0.3388	0.39	-0.0512	0.965133	AT5G57510.1
30196513	2	0.1155	0.3873	0.39	-0.0027	0.99813	AT3G43190.1	sucrose synthase 4
30196532	6	<.0001	0.54903	0.39	0.15903	1.11654	AT5G26830.1	Threonyl-tRNA synthetase
30196544	2	0.0049	0.5713	0.39	0.1813	1.13391	AT5G60030.1
30196562	1	0.8545	0.06908	0.39	-0.32092	0.800559	AT1G15000.1	serine carboxypeptidase-like 50
30196609	3	0.0009	0.5015	0.39	0.1115	1.08035	AT1G73940.1
30196706	9	<.0001	0.46628	0.39	0.07628	1.0543	AT1G43170.5	ribosomal protein 1
30196731	1	0.0054	0.6923	0.39	0.3023	1.23311	AT5G61890.1	Integrase-type DNA-binding superfamily protein
30196742	1	0.0848	0.4296	0.39	0.0396	1.02783
30196781	46	<.0001	0.3802	0.39	-0.0098	0.99323	AT2G29960.1	cyclophilin 5
30196787	6	<.0001	0.40628	0.39	0.01628	1.01135	AT1G73670.1	MAP kinase 15
30196801	1	0.5185	0.437	0.39	0.047	1.03311	AT3G02790.1	zinc finger (C2H2 type) family protein
30196910	1	0.3993	0.2028	0.39	-0.1872	0.878309	AT4G20960.1	Cytidine/deoxycytidylate deaminase family protein
30196927	3	0.0201	0.355	0.39	-0.035	0.976032	AT4G32360.1	Pyridine nucleotide-disulphide oxidoreductase family protein
30196943	110	<.0001	0.84002	0.39	0.45002	1.36606
30196992	5	0.015	0.5304	0.39	0.1404	1.10221	AT4G27270.1	Quinone reductase family protein
30197013	1	0.2569	0.4826	0.39	0.0926	1.06629	AT5G16760.1	Inositol 1,3,4-trisphosphate 5/6-kinase family protein
30197054	9	0.0082	0.26408	0.39	-0.12592	0.916419	AT3G13224.2	RNA-binding (RRM/RBD/RNP motifs) family protein
30197086	1	0.7999	-0.1383	0.39	-0.5283	0.693371	AT5G28050.2	Cytidine/deoxycytidylate deaminase family protein
30197087	12	0.1002	0.1696	0.39	-0.2204	0.858327	AT5G28050.2	Cytidine/deoxycytidylate deaminase family protein
30197097	6	0.0013	0.442	0.39	0.052	1.0367	AT1G11910.1	aspartic proteinase A1
30197120	7	0.1235	0.289	0.39	-0.101	0.932386	AT1G49600.1	RNA-binding protein 47A
30197223	1	0.0027	0.8861	0.39	0.4961	1.4104	AT2G26230.1	uricase / urate oxidase / nodulin 35, putative
30197271	1	0.2207	0.5325	0.39	0.1425	1.10382	AT1G21326.1	VQ motif-containing protein
30197317	2	0.1135	0.7861	0.39	0.3961	1.31595	AT3G12490.2	cystatin B
30197377	5	0.8015	-0.03464	0.39	-0.42464	0.745025	AT1G52340.1	NAD(P)-binding Rossmann-fold superfamily protein
30197386	3	0.1788	0.4363	0.39	0.0463	1.03261	AT3G22400.1	PLAT/LH2 domain-containing lipoxygenase family protein
30197424	9	<.0001	0.36023	0.39	-0.02977	0.979576	AT2G34480.1	Ribosomal protein L18ae/LX family protein
30197425	3	0.7251	0.07272	0.39	-0.31728	0.802582	AT1G53580.1	glyoxalase II 3
30197449	4	0.1984	0.2666	0.39	-0.1234	0.918022	AT2G33740.2	Nitrogen regulatory PII-like, alpha/beta
30197456	17	<.0001	0.43432	0.39	0.04432	1.0312	AT2G34480.1	Ribosomal protein L18ae/LX family protein
30197458	1	0.8215	0.1405	0.39	-0.2495	0.841188	AT2G34470.2	urease accessory protein G
30197461	8	<.0001	0.5494	0.39	0.1594	1.11682	AT3G52880.1	monodehydroascorbate reductase 1
30197503	7	0.0012	0.3497	0.39	-0.0403	0.972453	AT1G01420.1	UDP-glucosyl transferase 72B3
30197529	4	0.0022	0.5134	0.39	0.1234	1.0893	AT3G13790.1	Glycosyl hydrolases family 32 protein
30197560	2	0.1043	0.6459	0.39	0.2559	1.19408	AT3G03190.1	glutathione S-transferase F11
30197585	3	<.0001	0.7978	0.39	0.4078	1.32666	AT3G12670.1	CTP synthase family protein
30197606	1	0.8977	0.05132	0.39	-0.33868	0.790764	AT1G79280.3	nuclear pore anchor
30197658	2	0.0106	0.4218	0.39	0.0318	1.02229	AT1G60710.1	NAD(P)-linked oxidoreductase superfamily protein
30197717	17	<.0001	0.31124	0.39	-0.07876	0.946871	AT5G20720.3	chaperonin 20
30197828	1	0.452	0.2397	0.39	-0.1503	0.901063	AT3G03490.1	peroxin 19-1
30197857	2	0.7042	0.1688	0.39	-0.2212	0.857852	AT1G21460.1	Nodulin MtN3 family protein
30197868	14	<.0001	0.45094	0.39	0.06094	1.04315	AT1G43170.8	ribosomal protein 1
30197879	1	0.4752	0.156	0.39	-0.234	0.850274
30197892	4	0.0001	0.5905	0.39	0.2005	1.1491	AT3G23640.2	heteroglycan glucosidase 1
30197910	3	0.0003	0.757	0.39	0.367	1.28967	AT4G15000.1	Ribosomal L27e protein family
30197932	1	0.748	0.09905	0.39	-0.29095	0.817364	AT2G36320.1	A20/AN1-like zinc finger family protein
30197950	13	0.0001	0.30488	0.39	-0.08512	0.942706	AT1G10390.1	Nucleoporin autopeptidase
30197978	1	0.3461	-0.5596	0.39	-0.9496	0.517776	AT5G47770.1	farnesyl diphosphate synthase 1
30198003	3	0.0261	0.3076	0.39	-0.0824	0.944485	AT5G64670.1	Ribosomal protein L18e/L15 superfamily protein
30198012	3	0.1609	0.2512	0.39	-0.1388	0.908274	AT5G11500.1
30198033	1	0.4681	0.2716	0.39	-0.1184	0.921209	AT1G65320.1	Cystathionine beta-synthase (CBS) family protein
30198034	1	0.1238	0.7817	0.39	0.3917	1.31194	AT2G43710.1	Plant stearoyl-acyl-carrier-protein desaturase family protein
30198036	4	0.5195	0.1423	0.39	-0.2477	0.842238	AT1G66200.1	glutamine synthase clone F11
30198037	69	<.0001	0.46247	0.39	0.07247	1.05152	AT1G70730.3	Phosphoglucomutase/phosphomannomutase family protein
30198046	2	0.8992	0.01585	0.39	-0.37415	0.77156	AT1G05680.1	Uridine diphosphate glycosyltransferase 74E2
30198054	3	0.3051	0.321	0.39	-0.069	0.953299	AT1G79330.1	metacaspase 5
30198056	1	0.4999	0.2526	0.39	-0.1374	0.909156	AT1G28200.1	FH interacting protein 1
30198086	6	0.0337	0.3285	0.39	-0.0615	0.958267	AT5G01650.1	Tautomerase/MIF superfamily protein
30198116	1	0.3437	0.3257	0.39	-0.0643	0.956409	AT1G49950.1	telomere repeat binding factor 1
30198286	1	0.291	0.4862	0.39	0.0962	1.06895	AT1G60730.1	NAD(P)-linked oxidoreductase superfamily protein
30198302	1	0.2889	0.4973	0.39	0.1073	1.07721	AT2G14260.1	proline iminopeptidase
30198306	2	0.7325	0.2935	0.39	-0.0965	0.935299	AT3G50670.1	U1 small nuclear ribonucleoprotein-70K
30198334	1	0.2273	0.2832	0.39	-0.1068	0.928646	AT3G07320.1	O-Glycosyl hydrolases family 17 protein
30198447	3	0.0878	0.2997	0.39	-0.0903	0.939327	AT2G43180.2	Phosphoenolpyruvate carboxylase family protein
30198480	18	0.0883	0.2378	0.39	-0.1522	0.899877	AT3G10920.1	manganese superoxide dismutase 1
30198660	12	0.0004	0.4997	0.39	0.1097	1.079	AT1G12000.1	Phosphofructokinase family protein
30198661	2	0.0062	0.34531	0.39	-0.04469	0.969498	AT1G59610.1	dynamin-like 3
30198717	2	0.0495	0.4374	0.39	0.0474	1.0334	AT5G64460.6	Phosphoglycerate mutase family protein
30198729	2	0.0084	0.6332	0.39	0.2432	1.18362	AT5G61030.1	glycine-rich RNA-binding protein 3
30198731	2	0.2027	0.3549	0.39	-0.0351	0.975964	AT5G16120.2	alpha/beta-Hydrolases superfamily protein
30198772	4	0.0075	0.8065	0.39	0.4165	1.33469	AT1G80230.1	Rubredoxin-like superfamily protein
30198815	13	<.0001	0.3477	0.39	-0.0423	0.971106	AT1G12520.1	copper chaperone for SOD1
30198837	15	0.0011	0.24528	0.39	-0.14472	0.904555	AT1G17160.1	pfkB-like carbohydrate kinase family protein
30198920	6	0.0257	0.369	0.39	-0.021	0.985549	AT4G38710.2	glycine-rich protein
30198964	6	0.005	0.29021	0.39	-0.09979	0.933169	AT5G56350.1	Pyruvate kinase family protein
30199003	11	<.0001	0.25463	0.39	-0.13537	0.910436	AT3G59290.1	ENTH/VHS family protein
30199017	9	<.0001	0.6452	0.39	0.2552	1.1935	AT4G11290.1	Peroxidase superfamily protein
30199049	43	<.0001	0.62037	0.39	0.23037	1.17314	AT4G15530.5	pyruvate orthophosphate dikinase
30199128	1	0.3177	0.243	0.39	-0.147	0.903127	AT5G37770.1	EF hand calcium-binding protein family
30199136	12	<.0001	0.48584	0.39	0.09584	1.06869	AT5G17310.2	UDP-glucose pyrophosphorylase 2
30199147	1	0.0599	-0.8579	0.39	-1.2479	0.421061	AT1G42970.1	glyceraldehyde-3-phosphate dehydrogenase B subunit
30199148	3	0.8393	-0.07375	0.39	-0.46375	0.725099	AT5G10860.1	Cystathionine beta-synthase (CBS) family protein
30199184	1	0.1406	0.5331	0.39	0.1431	1.10428	AT1G27390.1	translocase outer membrane 20-2
30199232	1	0.1304	0.5608	0.39	0.1708	1.12568	AT1G54100.1	aldehyde dehydrogenase 7B4
30199257	3	0.2961	0.1541	0.39	-0.2359	0.849155	AT5G03905.1	Iron-sulphur cluster biosynthesis family protein
30199271	9	0.0052	0.4794	0.39	0.0894	1.06393	AT5G42740.1	Sugar isomerase (SIS) family protein
30199280	1	0.1829	0.9849	0.39	0.5949	1.51037	AT3G52850.1	vacuolar sorting receptor homolog 1
30199322	4	<.0001	0.8021	0.39	0.4121	1.33062	AT1G55170.1
30199362	1	0.1744	0.3238	0.39	-0.0662	0.955151	AT1G59640.1	BIG PETAL P
30199387	5	0.1402	0.2591	0.39	-0.1309	0.913262	AT1G30580.1	GTP binding
30199419	2	0.0248	0.5332	0.39	0.1432	1.10435
30199464	3	0.0009	1.2203	0.39	0.8303	1.77806	AT5G57120.1
30199466	1	0.3734	0.3132	0.39	-0.0768	0.948158	AT1G59710.1	Protein of unknown function (DUF569)
30199475	2	0.0069	0.6642	0.39	0.2742	1.20932	AT3G23640.2	heteroglycan glucosidase 1
30199481	10	0.0002	0.38939	0.39	-0.00061	0.999577	AT2G27730.1	copper ion binding
30199544	7	<.0001	0.383	0.39	-0.007	0.99516	AT5G10770.1	Eukaryotic aspartyl protease family protein
30199551	2	0.2291	0.2484	0.39	-0.1416	0.906513	AT3G48730.1	glutamate-1-semialdehyde 2,1-aminomutase 2
30199570	1	0.0778	0.4319	0.39	0.0419	1.02947	AT1G22540.1	Major facilitator superfamily protein
30199571	4	0.0004	0.428	0.39	0.038	1.02669	AT2G16570.1	GLN phosphoribosyl pyrophosphate amidotransferase 1
30199604	3	0.0911	0.4478	0.39	0.0578	1.04088	AT2G29540.2	RNApolymerase 14 kDa subunit
30199614	1	0.9964	0.0017	0.39	-0.3883	0.764029	AT5G56030.1	heat shock protein 81-2
30199634	7	0.0783	0.3217	0.39	-0.0683	0.953761	AT4G35770.1	Rhodanese/Cell cycle control phosphatase superfamily protein
30199652	1	0.0013	1.1447	0.39	0.7547	1.68728	AT1G09750.1	Eukaryotic aspartyl protease family protein
30199746	2	0.1976	0.3562	0.39	-0.0338	0.976844
30199764	3	0.0012	0.4468	0.39	0.0568	1.04016	AT3G22430.1
30199844	1	0.3386	0.382	0.39	-0.008	0.99447	AT1G52820.1	2-oxoglutarate (2OG) and Fe(II)-dependent oxygenase superfamily protein
30199901	11	<.0001	0.79977	0.39	0.40977	1.32847	AT5G43940.1	GroES-like zinc-binding dehydrogenase family protein
30199914	5	0.001	0.4166	0.39	0.0266	1.01861	AT4G16580.1	Protein phosphatase 2C family protein
30199930	2	0.4723	0.1609	0.39	-0.2291	0.853167	AT5G55000.2	potassium channel tetramerisation domain-containing protein / pentapeptide repeat-containing protein
30199985	24	<.0001	0.4242	0.39	0.0342	1.02399	AT3G12110.1	actin-11
30199992	2	0.0993	0.312	0.39	-0.078	0.94737	AT5G55670.1	RNA-binding (RRM/RBD/RNP motifs) family protein
30200038	3	0.7444	0.1253	0.39	-0.2647	0.832372	AT5G45920.1	SGNH hydrolase-type esterase superfamily protein
30200042	2	0.2349	0.1788	0.39	-0.2112	0.863818	AT4G12080.1	AT-hook motif nuclear-localized protein 1
30200052	15	0.0036	0.18815	0.39	-0.20185	0.869435	AT2G02500.1	Nucleotide-diphospho-sugar transferases superfamily protein
30200114	8	0.1186	0.11937	0.39	-0.27063	0.828957	AT4G36690.1	U2 snRNP auxilliary factor, large subunit, splicing factor
30200124	2	0.8885	0.07549	0.39	-0.31451	0.804124	AT1G11930.2	Predicted pyridoxal phosphate-dependent enzyme, YBL036C type
30200160	1	0.1403	0.2171	0.39	-0.1729	0.887058	AT4G01690.2	Flavin containing amine oxidoreductase family
30200186	14	<.0001	0.48924	0.39	0.09924	1.07121	AT5G27540.1	MIRO-related GTP-ase 1
30200269	1	0.3077	0.3126	0.39	-0.0774	0.947764
30200279	2	0.0723	0.4921	0.39	0.1021	1.07333	AT2G45550.1	cytochrome P450, family 76, subfamily C, polypeptide 4
30200299	13	<.0001	0.41102	0.39	0.02102	1.01468	AT3G54290.1
30200307	1	0.2581	0.2634	0.39	-0.1266	0.915988	AT4G19880.1	Glutathione S-transferase family protein
30200352	2	0.102	0.2995	0.39	-0.0905	0.939197	AT3G53580.1	diaminopimelate epimerase family protein
30200353	1	0.1977	0.3587	0.39	-0.0313	0.978538	AT3G53580.1	diaminopimelate epimerase family protein
30200411	5	0.0085	0.4719	0.39	0.0819	1.05841	AT2G05790.1	O-Glycosyl hydrolases family 17 protein
30200430	1	0.2583	0.2551	0.39	-0.1349	0.910733	AT3G12490.2	cystatin B
30200445	2	0.5281	0.1269	0.39	-0.2631	0.833295	AT3G02830.1	zinc finger protein 1
30200466	2	0.0012	0.5194	0.39	0.1294	1.09384	AT1G22870.1	Protein kinase family protein with ARM repeat domain
30200510	4	0.0141	0.41	0.39	0.02	1.01396	AT5G17770.1	NADH:cytochrome B5 reductase 1
30200530	1	0.1734	0.5372	0.39	0.1472	1.10742	AT3G13960.1	growth-regulating factor 5
30200546	1	0.6724	-0.184	0.39	-0.574	0.671752	AT1G63440.1	heavy metal atpase 5
30200573	12	<.0001	0.41934	0.39	0.02934	1.02055	AT2G40600.1	appr-1-p processing enzyme family protein
30200586	2	0.1121	0.7097	0.39	0.3197	1.24807	AT3G51590.1	lipid transfer protein 12
30200591	1	0.0593	0.7155	0.39	0.3255	1.2531	AT3G62160.1	HXXXD-type acyl-transferase family protein
30200682	1	0.3735	0.2373	0.39	-0.1527	0.899565	AT4G27080.2	PDI-like 5-4
30200683	2	0.0122	0.4714	0.39	0.0814	1.05804	AT5G58100.1
30200688	1	0.7751	-0.2187	0.39	-0.6087	0.655787	AT5G56030.2	heat shock protein 81-2
30200700	4	0.9149	0.01377	0.39	-0.37623	0.770448	AT1G01910.2	P-loop containing nucleoside triphosphate hydrolases superfamily protein
30200706	7	<.0001	0.4531	0.39	0.0631	1.04471	AT4G11820.2	hydroxymethylglutaryl-CoA synthase / HMG-CoA synthase / 3-hydroxy-3-methylglutaryl coenzyme A synthase
30200752	1	0.0174	0.4996	0.39	0.1096	1.07893	AT1G33980.2	Smg-4/UPF3 family protein
30200794	2	0.8091	-0.09589	0.39	-0.48589	0.714056	AT1G60420.1	DC1 domain-containing protein
30200822	5	0.0002	0.4784	0.39	0.0884	1.06319	AT3G13060.2	evolutionarily conserved C-terminal region 5
30200868	1	0.0328	0.3709	0.39	-0.0191	0.986848	AT3G44150.1
30200876	12	<.0001	0.2857	0.39	-0.1043	0.930256	AT1G18640.2	3-phosphoserine phosphatase
30200890	1	0.2658	0.4737	0.39	0.0837	1.05973	AT1G33500.1
30200892	1	0.3754	0.27	0.39	-0.12	0.920188	AT5G47390.1	myb-like transcription factor family protein
30200965	2	0.3073	0.2278	0.39	-0.1622	0.893661	AT3G45300.1	isovaleryl-CoA-dehydrogenase
30201022	6	0.0024	0.4089	0.39	0.0189	1.01319	AT5G58490.1	NAD(P)-binding Rossmann-fold superfamily protein
30201037	1	0.057	0.797	0.39	0.407	1.32593
30201050	2	0.0338	0.3807	0.39	-0.0093	0.993574
30201079	4	0.99	0.001801	0.39	-0.388199	0.764083	AT5G07990.1	Cytochrome P450 superfamily protein
30201144	1	0.0958	0.4503	0.39	0.0603	1.04268	AT5G42740.1	Sugar isomerase (SIS) family protein
30201207	21	0.1018	0.211	0.39	-0.179	0.883315	AT3G53990.1	Adenine nucleotide alpha hydrolases-like superfamily protein
30201239	4	0.0162	0.2858	0.39	-0.1042	0.930321	AT1G24050.1	RNA-processing, Lsm domain
30201300	4	0.31	0.1325	0.39	-0.2575	0.836536	AT4G36810.1	geranylgeranyl pyrophosphate synthase 1
30201321	3	0.8798	-0.03142	0.39	-0.42142	0.746689
30201370	24	<.0001	0.34719	0.39	-0.04281	0.970762	AT3G16950.1	lipoamide dehydrogenase 1
30201441	2	0.0788	0.3867	0.39	-0.0033	0.997715	AT1G51560.1	Pyridoxamine 5\'-phosphate oxidase family protein
30201516	1	0.9417	-0.04102	0.39	-0.43102	0.741737	AT3G62760.1	Glutathione S-transferase family protein
30201535	12	<.0001	0.55609	0.39	0.16609	1.12201	AT3G07100.1	Sec23/Sec24 protein transport family protein
30201551	1	0.8084	0.0888	0.39	-0.3012	0.811577	AT5G15610.2	Proteasome component (PCI) domain protein
30201671	2	0.0647	0.331	0.39	-0.059	0.959929	AT1G25375.1	Metallo-hydrolase/oxidoreductase superfamily protein
30201738	1	0.1055	0.6084	0.39	0.2184	1.16344	AT4G10260.1	pfkB-like carbohydrate kinase family protein
30201743	2	0.049	0.28	0.39	-0.11	0.926588	AT1G31670.1	Copper amine oxidase family protein
30201766	1	0.3465	0.2816	0.39	-0.1084	0.927616	AT1G27210.1	ARM repeat superfamily protein
30201768	2	0.1262	0.226	0.39	-0.164	0.892547	AT3G63000.1	NPL4-like protein 1
30201911	2	0.6646	0.1508	0.39	-0.2392	0.847215	AT2G22780.1	peroxisomal NAD-malate dehydrogenase 1
30201936	1	0.0994	0.6282	0.39	0.2382	1.17952	AT2G39210.1	Major facilitator superfamily protein
30201993	3	0.4549	0.2742	0.39	-0.1158	0.92287	AT1G78660.2	gamma-glutamyl hydrolase 1
30201996	3	0.742	0.09569	0.39	-0.29431	0.815462	AT2G16060.1	hemoglobin 1
30202000	2	0.5354	0.4786	0.39	0.0886	1.06334	AT4G18930.1	RNA ligase/cyclic nucleotide phosphodiesterase family protein
30202015	3	0.0004	0.5345	0.39	0.1445	1.10535	AT4G24680.1	modifier of snc1
30202062	6	0.196	0.1701	0.39	-0.2199	0.858625	AT5G22060.1	DNAJ homologue 2
30202066	4	0.0032	0.31106	0.39	-0.07894	0.946753	AT3G10650.1
30202068	1	0.0021	0.7788	0.39	0.3888	1.3093	AT2G44120.2	Ribosomal protein L30/L7 family protein
30202083	10	0.5877	0.0729	0.39	-0.3171	0.802682	AT2G24200.2	Cytosol aminopeptidase family protein
30202125	2	0.9855	0.005743	0.39	-0.384257	0.766173	AT4G35470.1	plant intracellular ras group-related LRR 4
30202169	5	0.0227	0.357	0.39	-0.033	0.977386	AT5G67230.1	Nucleotide-diphospho-sugar transferases superfamily protein
30202228	1	0.8412	0.04389	0.39	-0.34611	0.786702
30202238	5	0.0034	1.0259	0.39	0.6359	1.55391	AT1G71350.1	eukaryotic translation initiation factor SUI1 family protein
30202282	2	0.0156	0.656	0.39	0.266	1.20247	AT2G37040.1	PHE ammonia lyase 1
30202287	1	0.055	0.583	0.39	0.193	1.14314	AT3G13940.1	DNA binding;DNA-directed RNA polymerases
30202310	23	<.0001	0.51362	0.39	0.12362	1.08947	AT2G19770.1	profilin 5
30202356	1	0.7992	0.09196	0.39	-0.29804	0.813357	AT5G20890.1	TCP-1/cpn60 chaperonin family protein
30202397	1	0.0208	0.4899	0.39	0.0999	1.0717	AT1G15520.1	pleiotropic drug resistance 12
30202457	17	<.0001	0.27912	0.39	-0.11088	0.926023	AT2G42710.1	Ribosomal protein L1p/L10e family
30202468	6	0.0047	0.27741	0.39	-0.11259	0.924926	AT2G15480.2	UDP-glucosyl transferase 73B5
30202491	13	<.0001	0.4305	0.39	0.0405	1.02847	AT1G65870.1	Disease resistance-responsive (dirigent-like protein) family protein
30202499	4	0.0039	0.4745	0.39	0.0845	1.06032	AT1G55120.1	beta-fructofuranosidase 5
30202524	14	<.0001	0.4142	0.39	0.0242	1.01692	AT3G25780.1	allene oxide cyclase 3
30202584	6	0.0223	0.3511	0.39	-0.0389	0.973397	AT1G15710.1	prephenate dehydrogenase family protein
30202606	1	0.0506	0.601	0.39	0.211	1.15749	AT4G08950.1	Phosphate-responsive 1 family protein
30202609	1	0.0092	0.6674	0.39	0.2774	1.21201	AT5G58300.1	Leucine-rich repeat protein kinase family protein
30202610	10	0.0024	0.3622	0.39	-0.0278	0.980915	AT3G08670.1
30202651	1	0.7315	0.1474	0.39	-0.2426	0.845221	AT3G14180.1	sequence-specific DNA binding transcription factors
30202669	2	0.017	0.6082	0.39	0.2182	1.16328	AT5G26830.1	Threonyl-tRNA synthetase
30202683	1	0.0609	0.5634	0.39	0.1734	1.12771	AT4G34215.2	Domain of unknown function (DUF303)
30202807	2	0.0904	0.4527	0.39	0.0627	1.04442	AT3G54250.1	GHMP kinase family protein
30202831	1	0.4309	0.4047	0.39	0.0147	1.01024	AT1G27970.1	nuclear transport factor 2B
30202850	2	0.0116	0.5099	0.39	0.1199	1.08666	AT1G70500.1	Pectin lyase-like superfamily protein
30202897	1	0.1168	0.3881	0.39	-0.0019	0.998684	AT2G39980.1	HXXXD-type acyl-transferase family protein
30202919	9	<.0001	0.38809	0.39	-0.00191	0.998677	AT1G29370.1	Kinase-related protein of unknown function (DUF1296)
30202922	3	0.0008	0.5575	0.39	0.1675	1.12311	AT1G10490.1	Domain of unknown function (DUF1726) ;Putative ATPase (DUF699)
30203057	1	0.0938	0.5053	0.39	0.1153	1.0832	AT3G62030.2	rotamase CYP 4
30203092	3	0.4007	0.4146	0.39	0.0246	1.0172	AT3G53620.1	pyrophosphorylase 4
30203129	5	0.0003	0.33611	0.39	-0.05389	0.963335	AT4G11060.1	mitochondrially targeted single-stranded DNA binding protein
30203147	11	0.0003	0.32734	0.39	-0.06266	0.957497	AT3G04600.1	Nucleotidylyl transferase superfamily protein
30203164	2	0.2873	0.1554	0.39	-0.2346	0.849921	AT1G28520.1	vascular plant one zinc finger protein
30203185	3	0.0249	0.2906	0.39	-0.0994	0.933421	AT2G43950.2	chloroplast outer envelope protein 37
30203200	1	0.7184	0.5017	0.39	0.1117	1.0805	AT2G47470.1	thioredoxin family protein
30203214	6	0.0013	0.2601	0.39	-0.1299	0.913895	AT1G03090.2	methylcrotonyl-CoA carboxylase alpha chain, mitochondrial / 3-methylcrotonyl-CoA carboxylase 1 (MCCA)
30203254	1	0.12	0.4132	0.39	0.0232	1.01621	AT1G09830.1	Glycinamide ribonucleotide (GAR) synthetase
30203256	16	0.0236	0.238	0.39	-0.152	0.900002	AT1G53240.1	Lactate/malate dehydrogenase family protein
30203264	2	0.1214	-0.4271	0.39	-0.8171	0.567582	AT3G45850.1	P-loop containing nucleoside triphosphate hydrolases superfamily protein
30203271	11	<.0001	0.41732	0.39	0.02732	1.01912	AT5G03040.2	IQ-domain 2
30203276	1	0.7988	-0.0659	0.39	-0.4559	0.729055	AT5G53160.2	regulatory components of ABA receptor 3
30203340	4	0.0045	0.4957	0.39	0.1057	1.07602	AT5G05010.2	clathrin adaptor complexes medium subunit family protein
30203341	1	0.8048	0.1286	0.39	-0.2614	0.834278	AT3G51000.1	alpha/beta-Hydrolases superfamily protein
30203354	1	0.0614	0.6018	0.39	0.2118	1.15813	AT1G19450.1	Major facilitator superfamily protein
30203356	3	0.0316	0.3819	0.39	-0.0081	0.994401	AT1G09850.1	xylem bark cysteine peptidase 3
30203357	3	0.3864	0.1576	0.39	-0.2324	0.851218	AT5G60860.1	RAB GTPase homolog A1F
30203374	1	0.853	-0.0553	0.39	-0.4453	0.734432	AT5G48230.2	acetoacetyl-CoA thiolase 2
30203403	23	0.0028	0.18772	0.39	-0.20228	0.869176	AT3G62600.1	DNAJ heat shock family protein
30203461	4	0.1819	0.1946	0.39	-0.1954	0.873331	AT5G43600.1	ureidoglycolate amidohydrolase
30203475	7	<.0001	0.57409	0.39	0.18409	1.1361	AT1G66580.1	senescence associated gene 24
30203493	1	0.819	0.1679	0.39	-0.2221	0.857317	AT3G55140.1	Pectin lyase-like superfamily protein
30203532	2	0.0032	0.5175	0.39	0.1275	1.0924	AT5G40890.1	chloride channel A
30203562	4	0.446	0.09302	0.39	-0.29698	0.813954	AT3G13860.1	heat shock protein 60-3A
30203563	7	<.0001	0.68207	0.39	0.29207	1.2244	AT5G50840.2
30203579	2	0.0211	0.4676	0.39	0.0776	1.05526	AT4G39850.1	peroxisomal ABC transporter 1
30203590	1	0.07	0.4537	0.39	0.0637	1.04514	AT1G19450.1	Major facilitator superfamily protein
30203592	1	0.0935	0.7058	0.39	0.3158	1.2447	AT1G10950.1	transmembrane nine 1
30203606	2	0.0986	0.16919	0.39	-0.22081	0.858084	AT1G16740.1	Ribosomal protein L20
30203634	1	0.3913	0.3724	0.39	-0.0176	0.987875	AT2G26980.4	CBL-interacting protein kinase 3
30203639	1	0.0573	0.5307	0.39	0.1407	1.10244	AT2G25770.1	Polyketide cyclase/dehydrase and lipid transport superfamily protein
30203660	2	0.0093	0.4358	0.39	0.0458	1.03226	AT3G56900.1	Transducin/WD40 repeat-like superfamily protein
30203675	3	0.0936	0.2531	0.39	-0.1369	0.909471	AT1G71750.1	Hypoxanthine-guanine phosphoribosyltransferase
30203692	3	0.3554	0.1565	0.39	-0.2335	0.850569	AT5G27650.1	Tudor/PWWP/MBT superfamily protein
30203695	2	0.0436	0.5244	0.39	0.1344	1.09764	AT4G18800.1	RAB GTPase homolog A1D
30203698	1	0.1963	0.6629	0.39	0.2729	1.20823	AT2G47580.1	spliceosomal protein U1A
30203700	1	0.2394	0.359	0.39	-0.031	0.978742	AT3G27925.1	DegP protease 1
30203719	6	<.0001	0.54246	0.39	0.15246	1.11146	AT3G01090.2	SNF1 kinase homolog 10
30203726	10	0.0015	0.26356	0.39	-0.12644	0.916089	AT1G22940.1	thiamin biosynthesis protein, putative
30203727	3	0.0012	0.39243	0.39	0.00243	1.00169	AT3G63410.1	S-adenosyl-L-methionine-dependent methyltransferases superfamily protein
30203757	12	0.0003	0.34542	0.39	-0.04458	0.969572	AT1G79500.2	Aldolase-type TIM barrel family protein
30203774	2	0.0214	0.5088	0.39	0.1188	1.08583	AT3G46290.1	hercules receptor kinase 1
30203800	6	0.0105	0.4509	0.39	0.0609	1.04312	AT1G52690.1	Late embryogenesis abundant protein (LEA) family protein
30203810	5	0.4194	0.1548	0.39	-0.2352	0.849567	AT3G03080.1	Zinc-binding dehydrogenase family protein
30203812	1	0.1039	0.4395	0.39	0.0495	1.03491	AT5G60710.1	Zinc finger (C3HC4-type RING finger) family protein
30203834	4	0.0013	0.8016	0.39	0.4116	1.33016	AT4G17520.1	Hyaluronan / mRNA binding family
30203843	12	0.1195	-0.297	0.39	-0.687	0.621144	AT2G28000.1	chaperonin-60alpha
30203847	4	0.0571	0.3059	0.39	-0.0841	0.943373	AT1G08450.1	calreticulin 3
30203850	1	0.8406	-0.1688	0.39	-0.5588	0.678867	AT3G17020.1	Adenine nucleotide alpha hydrolases-like superfamily protein
30203911	2	0.0787	0.4207	0.39	0.0307	1.02151	AT1G14510.1	alfin-like 7
30203913	3	0.0461	0.6811	0.39	0.2911	1.22357	AT5G62810.1	peroxin 14
30203917	38	<.0001	0.51244	0.39	0.12244	1.08857	AT1G18080.1	Transducin/WD40 repeat-like superfamily protein
30203925	4	<.0001	0.5881	0.39	0.1981	1.14719	AT1G25350.2	glutamine-tRNA ligase, putative / glutaminyl-tRNA synthetase, putative / GlnRS, putative
30203948	5	0.0357	0.2367	0.39	-0.1533	0.899191	AT3G62020.1	germin-like protein 10
30203949	1	0.5176	0.1971	0.39	-0.1929	0.874845	AT3G45600.1	tetraspanin3
30203971	1	0.4146	0.1854	0.39	-0.2046	0.867779	AT5G13120.1	cyclophilin 20-2
30203986	2	0.0068	0.5457	0.39	0.1557	1.11396	AT3G05000.1	Transport protein particle (TRAPP) component
30204010	3	0.0119	1.0869	0.39	0.6969	1.62102	AT5G63400.1	adenylate kinase 1
30204012	3	0.0009	0.6125	0.39	0.2225	1.16675	AT1G21680.1	DPP6 N-terminal domain-like protein
30204015	3	0.7419	0.1531	0.39	-0.2369	0.848567	AT2G34590.1	Transketolase family protein
30204016	1	0.003	1.0516	0.39	0.6616	1.58184
30204021	1	0.2286	0.1787	0.39	-0.2113	0.863759	AT5G53000.1	2A phosphatase associated protein of 46 kD
30204063	27	<.0001	0.3009	0.39	-0.0891	0.940109	AT5G62530.1	aldehyde dehydrogenase 12A1
30204078	10	<.0001	0.47539	0.39	0.08539	1.06097	AT5G11880.1	Pyridoxal-dependent decarboxylase family protein
30204081	1	0.5965	0.2213	0.39	-0.1687	0.889644	AT4G32400.1	Mitochondrial substrate carrier family protein
30204121	18	<.0001	0.41857	0.39	0.02857	1.02	AT1G76680.1	12-oxophytodienoate reductase 1
30204135	1	0.0631	0.3722	0.39	-0.0178	0.987738	AT4G25150.1	HAD superfamily, subfamily IIIB acid phosphatase
30204194	6	<.0001	0.5531	0.39	0.1631	1.11969	AT4G13850.1	glycine-rich RNA-binding protein 2
30204196	5	0.0005	0.33475	0.39	-0.05525	0.962428	AT4G12780.1	Chaperone DnaJ-domain superfamily protein
30204200	3	0.0054	0.562	0.39	0.172	1.12662	AT5G64110.1	Peroxidase superfamily protein
30204207	2	0.0022	0.6676	0.39	0.2776	1.21218	AT5G19690.1	staurosporin and temperature sensitive 3-like A
30204217	2	0.08	0.3391	0.39	-0.0509	0.965334	AT5G24020.1	septum site-determining protein (MIND)
30204220	2	0.0059	0.6303	0.39	0.2403	1.18124	AT5G55190.1	RAN GTPase 3
30204245	1	0.527	0.1834	0.39	-0.2066	0.866577	AT2G20690.1	lumazine-binding family protein
30204248	6	0.0002	0.6497	0.39	0.2597	1.19723	AT5G60710.1	Zinc finger (C3HC4-type RING finger) family protein
30204255	3	0.0363	0.4212	0.39	0.0312	1.02186	AT3G50520.1	Phosphoglycerate mutase family protein
30204317	5	0.0062	0.4844	0.39	0.0944	1.06762	AT5G61030.1	glycine-rich RNA-binding protein 3
30204326	7	0.1403	0.2511	0.39	-0.1389	0.908211	AT1G56340.2	calreticulin 1a
30204342	4	0.0001	0.5063	0.39	0.1163	1.08395	AT1G08880.1	Histone superfamily protein
30204345	25	0.1102	0.2074	0.39	-0.1826	0.881114	AT1G75270.1	dehydroascorbate reductase 2
30204353	3	0.1942	0.1635	0.39	-0.2265	0.854706	AT1G02880.3	thiamin pyrophosphokinase1
30204374	1	0.4097	0.2201	0.39	-0.1699	0.888904	AT4G12080.1	AT-hook motif nuclear-localized protein 1
30204384	2	0.4023	0.2457	0.39	-0.1443	0.904818	AT2G38870.1	Serine protease inhibitor, potato inhibitor I-type family protein
30204387	1	0.7504	0.1176	0.39	-0.2724	0.827941	AT5G49555.1	FAD/NAD(P)-binding oxidoreductase family protein
30204416	3	0.0415	0.297	0.39	-0.093	0.937571	AT1G65870.1	Disease resistance-responsive (dirigent-like protein) family protein
30204485	1	0.8015	-0.2127	0.39	-0.6027	0.65852	AT1G45145.1	thioredoxin H-type 5
30204487	22	<.0001	0.46243	0.39	0.07243	1.05149	AT5G42080.1	dynamin-like protein
30204498	3	0.9423	0.009098	0.39	-0.380902	0.767957	AT3G03560.1
30204509	1	0.0324	0.3597	0.39	-0.0303	0.979217	AT1G27000.1	Protein of unknown function (DUF1664)
30204537	1	0.3552	0.3027	0.39	-0.0873	0.941283	AT1G15340.1	methyl-CPG-binding domain 10
30204542	6	<.0001	0.52275	0.39	0.13275	1.09638	AT3G58660.1	Ribosomal protein L1p/L10e family
30204578	1	0.0163	1.4613	0.39	1.0713	2.10133	AT3G21380.1	Mannose-binding lectin superfamily protein
30204579	5	0.1288	0.4824	0.39	0.0924	1.06614	AT2G38870.1	Serine protease inhibitor, potato inhibitor I-type family protein
30204589	1	0.8914	0.08255	0.39	-0.30745	0.808069	AT1G79830.3	golgin candidate 5
30204590	1	0.1101	0.6229	0.39	0.2329	1.17519	AT1G21370.1
30204597	3	0.0143	0.5383	0.39	0.1483	1.10826	AT3G51800.3	metallopeptidase M24 family protein
30204600	1	0.5453	0.3088	0.39	-0.0812	0.945271	AT5G59890.1	actin depolymerizing factor 4
30204605	2	0.0156	0.7811	0.39	0.3911	1.31139	AT3G29310.1	calmodulin-binding protein-related
30204618	2	0.0104	0.4653	0.39	0.0753	1.05358	AT3G04820.1	Pseudouridine synthase family protein
30204623	2	0.1403	0.3625	0.39	-0.0275	0.981119	AT3G19720.1	P-loop containing nucleoside triphosphate hydrolases superfamily protein
30204657	3	0.0008	0.5954	0.39	0.2054	1.15301	AT5G25880.1	NADP-malic enzyme 3
30204659	5	<.0001	0.61913	0.39	0.22913	1.17213	AT1G55810.3	uridine kinase-like 3
30204669	2	0.0096	0.545	0.39	0.155	1.11342	AT1G63640.1	P-loop nucleoside triphosphate hydrolases superfamily protein with CH (Calponin Homology) domain
30204676	1	0.4495	0.4034	0.39	0.0134	1.00933	AT5G01010.2
30204682	7	0.0113	0.2844	0.39	-0.1056	0.929418	AT4G23100.3	glutamate-cysteine ligase
30204685	5	0.2479	0.1802	0.39	-0.2098	0.864657	AT3G07750.2	3\'-5\'-exoribonuclease family protein
30204707	2	0.5485	-0.1203	0.39	-0.5103	0.702076	AT1G11910.1	aspartic proteinase A1
30204710	1	0.2357	0.4003	0.39	0.0103	1.00716	AT1G67890.1	PAS domain-containing protein tyrosine kinase family protein
30204724	1	0.126	0.4317	0.39	0.0417	1.02933	AT5G27380.1	glutathione synthetase 2
30204737	5	0.3536	0.1367	0.39	-0.2533	0.838975	AT2G41430.5	dehydration-induced protein (ERD15)
30204759	2	0.0364	0.4946	0.39	0.1046	1.0752	AT4G34340.1	TBP-associated factor 8
30204766	1	0.4805	0.3877	0.39	-0.0023	0.998407	AT1G32470.1	Single hybrid motif superfamily protein
30204775	8	0.0421	0.2643	0.39	-0.1257	0.916559	AT4G35850.1	Pentatricopeptide repeat (PPR) superfamily protein
30204776	2	0.0018	1.2628	0.39	0.8728	1.83121	AT4G12340.1	copper ion binding
30204788	6	0.0044	0.3068	0.39	-0.0832	0.943962	AT5G60210.1	ROP interactive partner 5
30204806	1	0.0023	0.65501	0.39	0.26501	1.20164	ATCG01120.1	chloroplast ribosomal protein S15
30204809	2	0.1787	0.2939	0.39	-0.0961	0.935559	AT1G33800.1	Protein of unknown function (DUF579)
30204812	2	0.0598	0.3978	0.39	0.0078	1.00542	AT5G04740.1	ACT domain-containing protein
30204822	12	<.0001	0.47951	0.39	0.08951	1.06401	AT2G47060.4	Protein kinase superfamily protein
30204835	1	0.074	0.3268	0.39	-0.0632	0.957139	AT5G48810.1	cytochrome B5 isoform D
30204838	1	0.1884	0.6628	0.39	0.2728	1.20815	AT3G22750.1	Protein kinase superfamily protein
30204845	3	0.5792	0.2611	0.39	-0.1289	0.914528	AT1G21690.1	ATPase family associated with various cellular activities (AAA)
30204865	12	0.0333	0.15083	0.39	-0.23917	0.847233	AT3G55010.2	phosphoribosylformylglycinamidine cyclo-ligase, chloroplast / phosphoribosyl-aminoimidazole synthetase / AIR synthase (PUR5)
30204883	1	0.1917	0.2699	0.39	-0.1201	0.920124	AT3G55270.1	mitogen-activated protein kinase phosphatase 1
30204886	4	0.0106	0.3184	0.39	-0.0716	0.951582
30204892	2	0.5318	0.2093	0.39	-0.1807	0.882275	AT3G19980.1	flower-specific, phytochrome-associated protein phosphatase 3
30204894	21	<.0001	0.54221	0.39	0.15221	1.11127	AT3G62120.1	Class II aaRS and biotin synthetases superfamily protein
30204896	3	0.0004	0.6079	0.39	0.2179	1.16304	AT4G31360.1	selenium binding
30204915	1	0.6149	0.1209	0.39	-0.2691	0.829837	AT3G45300.1	isovaleryl-CoA-dehydrogenase
30204926	1	0.0493	0.8101	0.39	0.4201	1.33802	AT5G09500.1	Ribosomal protein S19 family protein
30204936	2	0.0036	0.452	0.39	0.062	1.04391	AT3G51840.1	acyl-CoA oxidase 4
30204962	4	0.0161	0.3606	0.39	-0.0294	0.979828	AT3G04610.1	RNA-binding KH domain-containing protein
30204968	3	0.0412	0.41	0.39	0.02	1.01396	AT3G04120.1	glyceraldehyde-3-phosphate dehydrogenase C subunit 1
30204987	1	0.6196	0.09434	0.39	-0.29566	0.8147	AT2G46270.1	G-box binding factor 3
30204996	9	<.0001	0.58213	0.39	0.19213	1.14245	AT5G01970.1
30205034	3	0.0715	0.3286	0.39	-0.0614	0.958334	AT1G43850.1	SEUSS transcriptional co-regulator
30205036	1	0.6806	-0.09264	0.39	-0.48264	0.715667	AT5G58440.1	sorting nexin 2A
30205041	1	0.562	0.2135	0.39	-0.1765	0.884847	AT2G36530.1	Enolase
30205054	9	0.0114	0.3612	0.39	-0.0288	0.980235	AT4G25150.1	HAD superfamily, subfamily IIIB acid phosphatase
30205062	1	0.9186	0.01938	0.39	-0.37062	0.77345	AT1G09320.1	agenet domain-containing protein
30205106	6	0.0237	0.3124	0.39	-0.0776	0.947633	AT1G11910.1	aspartic proteinase A1
30205120	4	0.0044	0.3461	0.39	-0.0439	0.970029	AT1G09430.1	ATP-citrate lyase A-3
30205126	1	0.0587	0.3818	0.39	-0.0082	0.994332	AT5G14310.1	carboxyesterase 16
30205157	5	0.0034	0.4674	0.39	0.0774	1.05511	AT3G52990.1	Pyruvate kinase family protein
30205169	1	0.065	0.4632	0.39	0.0732	1.05205	AT1G48410.1	Stabilizer of iron transporter SufD / Polynucleotidyl transferase
30205198	1	0.2211	0.5091	0.39	0.1191	1.08606	AT3G10940.1	dual specificity protein phosphatase (DsPTP1) family protein
30205205	1	0.5828	0.2722	0.39	-0.1178	0.921592	AT2G19480.3	nucleosome assembly protein 1;2
30205221	1	0.6757	0.1294	0.39	-0.2606	0.834741	AT1G33490.1
30205225	1	0.3149	0.5559	0.39	0.1659	1.12187	AT4G24830.1	arginosuccinate synthase family
30205263	3	0.0047	0.723	0.39	0.333	1.25963	AT5G39380.1	Plant calmodulin-binding protein-related
30205266	2	0.0003	0.8631	0.39	0.4731	1.38809	AT5G50210.1	quinolinate synthase
30205274	2	0.1064	0.35	0.39	-0.04	0.972655	AT5G08680.1	ATP synthase alpha/beta family protein
30205276	4	0.0015	0.4041	0.39	0.0141	1.00982	AT5G61450.1	P-loop containing nucleoside triphosphate hydrolases superfamily protein
30205289	3	0.4134	0.1	0.39	-0.29	0.817902	AT4G29130.1	hexokinase 1
30205313	2	0.0241	0.5306	0.39	0.1406	1.10236	AT1G56440.1	Tetratricopeptide repeat (TPR)-like superfamily protein
30205369	2	0.1084	0.2206	0.39	-0.1694	0.889212	AT3G16520.3	UDP-glucosyl transferase 88A1
30205372	19	<.0001	0.39625	0.39	0.00625	1.00434	AT2G19730.1	Ribosomal L28e protein family
30205374	4	<.0001	0.35161	0.39	-0.03839	0.973741	AT3G16630.2	P-loop containing nucleoside triphosphate hydrolases superfamily protein
30205375	31	<.0001	0.40769	0.39	0.01769	1.01234	AT5G49910.1	chloroplast heat shock protein 70-2
30205392	1	0.8667	0.1902	0.39	-0.1998	0.870671	AT5G61310.2	Cytochrome c oxidase subunit Vc family protein
30205406	5	0.2771	0.1372	0.39	-0.2528	0.839266	AT1G27450.1	adenine phosphoribosyl transferase 1
30205422	1	0.2425	0.4726	0.39	0.0826	1.05892	AT4G08790.1	Nitrilase/cyanide hydratase and apolipoprotein N-acyltransferase family protein
30205432	1	0.3738	0.2314	0.39	-0.1586	0.895894	AT3G01100.1	hypothetical protein 1
30205461	4	0.127	0.1785	0.39	-0.2115	0.863639	AT5G46070.1	Guanylate-binding family protein
30205470	4	<.0001	0.69156	0.39	0.30156	1.23248	AT1G18650.1	plasmodesmata callose-binding protein 3
30205475	2	0.0965	0.3959	0.39	0.0059	1.0041	AT5G09810.1	actin 7
30205500	11	<.0001	0.37696	0.39	-0.01304	0.991002	AT1G43700.1	VIRE2-interacting protein 1
30205507	1	0.3236	0.1916	0.39	-0.1984	0.871517	AT4G12290.1	Copper amine oxidase family protein
30205529	4	<.0001	0.74026	0.39	0.35026	1.27479	AT3G52850.1	vacuolar sorting receptor homolog 1
30205532	1	0.1999	0.4988	0.39	0.1088	1.07833	AT2G25100.1	Polynucleotidyl transferase, ribonuclease H-like superfamily protein
30205543	3	0.0025	0.4755	0.39	0.0855	1.06106	AT5G44170.1	S-adenosyl-L-methionine-dependent methyltransferases superfamily protein
30205550	1	0.0387	0.474	0.39	0.084	1.05995	AT3G05030.1	sodium hydrogen exchanger 2
30205569	1	0.6813	0.2357	0.39	-0.1543	0.898568	AT4G33670.1	NAD(P)-linked oxidoreductase superfamily protein
30205593	3	0.293	0.1852	0.39	-0.2048	0.867659	AT4G12280.1	copper amine oxidase family protein
30205601	1	0.406	0.3229	0.39	-0.0671	0.954555	AT1G70850.3	MLP-like protein 34
30205606	3	0.1189	0.3291	0.39	-0.0609	0.958666	AT1G79920.1	Heat shock protein 70 (Hsp 70) family protein
30205618	1	0.357	0.4258	0.39	0.0358	1.02513	AT3G52780.1	Purple acid phosphatases superfamily protein
30205637	2	0.0275	0.3407	0.39	-0.0493	0.966405	AT1G74790.1	catalytics
30205638	1	0.5427	0.2721	0.39	-0.1179	0.921528	AT5G58770.1	Undecaprenyl pyrophosphate synthetase family protein
30205650	1	0.4366	-0.395	0.39	-0.785	0.580352	AT2G02380.1	glutathione S-transferase (class zeta) 2
30205665	7	0.0688	0.1569	0.39	-0.2331	0.850805	AT1G48030.1	mitochondrial lipoamide dehydrogenase 1
30205667	4	0.0004	1.1516	0.39	0.7616	1.69537	AT5G57120.1
30205680	1	0.0307	0.4799	0.39	0.0899	1.0643	AT5G19480.1
30205714	3	0.1302	0.2653	0.39	-0.1247	0.917195	AT3G08710.2	thioredoxin H-type 9
30205719	5	0.857	-0.02512	0.39	-0.41512	0.749957	AT1G72550.1	tRNA synthetase beta subunit family protein
30205752	1	0.0704	0.5537	0.39	0.1637	1.12016	AT5G23490.1
30205755	1	0.6543	-0.1367	0.39	-0.5267	0.694141	AT4G15510.1	Photosystem II reaction center PsbP family protein
30205776	1	0.1045	0.4545	0.39	0.0645	1.04572
30205787	3	0.1143	0.4372	0.39	0.0472	1.03326	AT1G71730.1
30205801	11	0.0052	0.3223	0.39	-0.0677	0.954158	AT1G10390.1	Nucleoporin autopeptidase
30205829	1	0.1618	0.4806	0.39	0.0906	1.06481	AT3G17900.1
30205845	1	0.7545	0.0961	0.39	-0.2939	0.815694	AT5G23570.1	XS domain-containing protein / XS zinc finger domain-containing protein-related
30205853	1	0.1191	0.4396	0.39	0.0496	1.03498	AT1G15020.2	quiescin-sulfhydryl oxidase 1
30205863	1	0.3399	0.2844	0.39	-0.1056	0.929418	AT1G08320.3	bZIP transcription factor family protein
30205882	2	0.0028	0.3752	0.39	-0.0148	0.989794	AT5G10770.1	Eukaryotic aspartyl protease family protein
30205904	6	0.0236	0.2978	0.39	-0.0922	0.938091	AT1G34430.1	2-oxoacid dehydrogenases acyltransferase family protein
30205929	1	0.0063	0.6965	0.39	0.3065	1.2367	AT1G74270.1	Ribosomal protein L35Ae family protein
30205936	4	0.3407	0.1905	0.39	-0.1995	0.870852	AT1G74040.1	2-isopropylmalate synthase 1
30205940	1	0.1211	0.3618	0.39	-0.0282	0.980643	AT5G55860.1	Plant protein of unknown function (DUF827)
30205959	1	0.0212	0.6486	0.39	0.2586	1.19632	AT1G58110.2	Basic-leucine zipper (bZIP) transcription factor family protein
30206008	16	0.003	0.3779	0.39	-0.0121	0.991648	AT2G24490.1	replicon protein A2
30206023	9	0.0801	0.15646	0.39	-0.23354	0.850545	AT1G67280.1	Glyoxalase/Bleomycin resistance protein/Dioxygenase superfamily protein
30206026	1	0.9913	-0.01389	0.39	-0.40389	0.755818	AT2G20520.1	FASCICLIN-like arabinogalactan 6
30206027	2	0.0205	0.8987	0.39	0.5087	1.42277	AT1G10200.1	GATA type zinc finger transcription factor family protein
30206033	16	<.0001	0.35608	0.39	-0.03392	0.976763	AT3G58610.3	ketol-acid reductoisomerase
30206046	2	0.233	0.2819	0.39	-0.1081	0.927809	AT3G19340.1	Protein of unknown function (DUF3754)
30206054	5	<.0001	0.46611	0.39	0.07611	1.05417	AT5G62810.1	peroxin 14
30206067	1	0.2731	0.3856	0.39	-0.0044	0.996955	AT1G27900.1	RNA helicase family protein
30206073	5	0.0226	0.3994	0.39	0.0094	1.00654	AT3G62240.1	RING/U-box superfamily protein
30206078	3	0.7911	0.04434	0.39	-0.34566	0.786948	AT5G49810.1	methionine S-methyltransferase
30206088	3	0.0009	0.704	0.39	0.314	1.24315	AT2G34700.1	Pollen Ole e 1 allergen and extensin family protein
30206091	3	0.4259	0.1247	0.39	-0.2653	0.832026	AT1G14650.2	SWAP (Suppressor-of-White-APricot)/surp domain-containing protein / ubiquitin family protein
30206106	1	0.7159	0.08113	0.39	-0.30887	0.807274	AT2G16430.2	purple acid phosphatase 10
30206110	13	0.2939	0.1107	0.39	-0.2793	0.823991
30206127	3	0.0009	0.887	0.39	0.497	1.41128	AT1G21680.1	DPP6 N-terminal domain-like protein
30206129	1	0.106	0.4667	0.39	0.0767	1.0546	AT2G35980.1	Late embryogenesis abundant (LEA) hydroxyproline-rich glycoprotein family
30206139	2	0.1507	0.3852	0.39	-0.0048	0.996678	AT3G21640.1	FKBP-type peptidyl-prolyl cis-trans isomerase family protein
30206146	3	0.0131	0.3919	0.39	0.0019	1.00132	AT1G05260.1	Peroxidase superfamily protein
30206149	2	0.1653	0.3227	0.39	-0.0673	0.954423	AT4G02580.1	NADH-ubiquinone oxidoreductase 24 kDa subunit, putative
30206155	7	0.0003	0.4555	0.39	0.0655	1.04645	AT1G79590.2	syntaxin of plants 52
30206161	3	0.2893	0.5148	0.39	0.1248	1.09036	AT4G35160.1	O-methyltransferase family protein
30206177	2	0.5518	0.144	0.39	-0.246	0.843231	AT1G80600.1	HOPW1-1-interacting 1
30206190	1	0.9276	0.03534	0.39	-0.35466	0.782054	AT4G26160.1	atypical CYS HIS rich thioredoxin 1
30206192	1	0.0373	0.9478	0.39	0.5578	1.47202	AT5G60710.1	Zinc finger (C3HC4-type RING finger) family protein
30206195	5	0.0002	0.7645	0.39	0.3745	1.29639	AT5G05340.1	Peroxidase superfamily protein
30206198	6	<.0001	0.58786	0.39	0.19786	1.147	AT3G24550.1	proline extensin-like receptor kinase 1
30206215	1	0.0382	0.716	0.39	0.326	1.25353	AT5G18790.1	Ribosomal protein L33 family protein
30206217	14	<.0001	1.1771	0.39	0.7871	1.7256	AT1G69230.2	SPIRAL1-like2
30206220	2	0.0017	0.5689	0.39	0.1789	1.13202	AT1G16780.1	Inorganic H pyrophosphatase family protein
30206251	9	<.0001	0.42743	0.39	0.03743	1.02628	AT5G46160.1	Ribosomal protein L14p/L23e family protein
30206257	5	0.003	0.3486	0.39	-0.0414	0.971712	AT2G32810.1	beta galactosidase 9
30206259	23	0.0494	0.2191	0.39	-0.1709	0.888288	AT1G75630.1	vacuolar H+-pumping ATPase 16 kDa proteolipid subunit 4
30206263	2	0.1084	0.4444	0.39	0.0544	1.03843	AT1G61250.1	secretory carrier 3
30206270	1	0.2221	0.703	0.39	0.313	1.24229	AT3G63490.1	Ribosomal protein L1p/L10e family
30206335	1	0.0959	0.4064	0.39	0.0164	1.01143	AT4G37640.1	calcium ATPase 2
30206362	14	<.0001	0.6587	0.39	0.2687	1.20472	AT1G20850.1	xylem cysteine peptidase 2
30206418	4	0.006	0.4296	0.39	0.0396	1.02783	AT5G56580.1	MAP kinase kinase 6
30206419	3	0.003	0.8781	0.39	0.4881	1.4026	AT5G03170.1	FASCICLIN-like arabinogalactan-protein 11
30206437	2	0.4008	0.2201	0.39	-0.1699	0.888904	AT2G37340.1	arginine/serine-rich zinc knuckle-containing protein 33
30206463	2	0.0041	0.4854	0.39	0.0954	1.06836	AT5G54660.1	HSP20-like chaperones superfamily protein
30206465	4	0.4333	0.1162	0.39	-0.2738	0.827138	AT3G61650.1	gamma-tubulin
30206472	2	0.3558	0.2648	0.39	-0.1252	0.916877	AT3G26310.1	cytochrome P450, family 71, subfamily B, polypeptide 35
30206511	14	<.0001	0.39851	0.39	0.00851	1.00592	AT5G56760.1	serine acetyltransferase 1;1
30206512	7	<.0001	0.6358	0.39	0.2458	1.18575	AT4G39150.2	DNAJ heat shock N-terminal domain-containing protein
30206513	4	0.0295	0.3394	0.39	-0.0506	0.965535	AT1G09630.1	RAB GTPase 11C
30206515	8	0.2681	0.2245	0.39	-0.1655	0.891619	AT1G34360.1	translation initiation factor 3 (IF-3) family protein
30206522	1	0.1961	0.4071	0.39	0.0171	1.01192
30206560	3	0.0906	0.3537	0.39	-0.0363	0.975153	AT4G13400.1	2-oxoglutarate (2OG) and Fe(II)-dependent oxygenase superfamily protein
30206601	1	0.7162	0.1188	0.39	-0.2712	0.82863	AT3G57080.1	Eukaryotic rpb5 RNA polymerase subunit family protein
30206617	8	<.0001	0.5986	0.39	0.2086	1.15557	AT3G04710.3	ankyrin repeat family protein
30206660	2	0.0256	0.4375	0.39	0.0475	1.03347	AT5G13510.1	Ribosomal protein L10 family protein
30206683	4	0.0016	0.6024	0.39	0.2124	1.15861	AT2G01600.1	ENTH/ANTH/VHS superfamily protein
30206700	5	0.0028	0.412	0.39	0.022	1.01537	AT1G71800.1	cleavage stimulating factor 64
30206711	20	0.0002	0.34893	0.39	-0.04107	0.971934	AT2G39990.1	eukaryotic translation initiation factor 2
30206735	2	0.0724	0.244	0.39	-0.146	0.903753	AT2G41600.5	Mitochondrial glycoprotein family protein
30206739	8	0.0003	0.29217	0.39	-0.09783	0.934437	AT1G60500.1	Dynamin related protein 4C
30206742	4	0.4213	0.3464	0.39	-0.0436	0.970231	AT1G51510.1	RNA-binding (RRM/RBD/RNP motifs) family protein
30206757	6	0.0003	0.29583	0.39	-0.09417	0.936811	AT1G13960.1	WRKY DNA-binding protein 4
30206785	3	0.0255	0.3416	0.39	-0.0484	0.967008	AT3G60500.1	3\'-5\'-exoribonuclease family protein
30206797	1	0.6497	0.227	0.39	-0.163	0.893166	AT1G53400.1	Ubiquitin domain-containing protein
30206814	1	0.0169	0.812	0.39	0.422	1.33978	AT3G01490.1	Protein kinase superfamily protein
30206816	5	0.0037	0.2924	0.39	-0.0976	0.934586	AT5G63980.1	Inositol monophosphatase family protein
30206817	2	0.3618	0.2407	0.39	-0.1493	0.901688	AT2G42810.2	protein phosphatase 5.2
30206830	2	0.0258	0.4959	0.39	0.1059	1.07617	AT3G48410.1	alpha/beta-Hydrolases superfamily protein
30206832	9	0.0011	-0.4676	0.39	-0.8576	0.55187	AT3G07770.1	HEAT SHOCK PROTEIN 89.1
30206856	4	0.1573	0.2855	0.39	-0.1045	0.930127	AT5G44320.1	Eukaryotic translation initiation factor 3 subunit 7 (eIF-3)
30206858	1	0.1998	0.4987	0.39	0.1087	1.07826	AT2G47640.2	Small nuclear ribonucleoprotein family protein
30206883	16	0.0003	0.4186	0.39	0.0286	1.02002	AT4G29840.1	Pyridoxal-5\'-phosphate-dependent enzyme family protein
30206890	1	0.2317	0.4613	0.39	0.0713	1.05066	AT4G01900.1	GLNB1 homolog
30206921	1	0.0122	1.0945	0.39	0.7045	1.62958	AT5G04000.2
30206937	3	0.0122	0.5026	0.39	0.1126	1.08117	AT1G23380.1	KNOTTED1-like homeobox gene 6
30206946	1	0.3566	0.2386	0.39	-0.1514	0.900376	AT5G17540.1	HXXXD-type acyl-transferase family protein
30206952	1	0.4762	0.2695	0.39	-0.1205	0.919869	AT3G62760.1	Glutathione S-transferase family protein
30206960	4	0.1849	0.1573	0.39	-0.2327	0.851041	AT2G47010.1
30206971	2	0.9026	0.02156	0.39	-0.36844	0.77462	AT5G13200.1	GRAM domain family protein
30206984	2	0.021	0.3725	0.39	-0.0175	0.987943	AT4G33420.1	Peroxidase superfamily protein
30206985	4	0.0025	0.33953	0.39	-0.05047	0.965622	AT5G06410.1	DNAJ heat shock N-terminal domain-containing protein
30207049	4	0.0011	0.35489	0.39	-0.03511	0.975957	AT2G27170.1	Structural maintenance of chromosomes (SMC) family protein
30207061	3	<.0001	0.8198	0.39	0.4298	1.34705	AT4G28360.1	Ribosomal protein L22p/L17e family protein
30207111	8	0.9911	0.001628	0.39	-0.388372	0.763991
30207143	3	0.2232	0.2414	0.39	-0.1486	0.902125	AT5G01390.1	DNAJ heat shock family protein
30207146	8	<.0001	0.4631	0.39	0.0731	1.05197	AT3G22330.1	putative mitochondrial RNA helicase 2
30207147	1	0.2284	0.3422	0.39	-0.0478	0.96741	AT3G53390.1	Transducin/WD40 repeat-like superfamily protein
30207171	2	0.1829	0.4941	0.39	0.1041	1.07482	AT2G28060.1	5\'-AMP-activated protein kinase beta-2 subunit protein
30207203	15	<.0001	0.45675	0.39	0.06675	1.04735	AT3G09630.1	Ribosomal protein L4/L1 family
30207208	2	0.4218	-0.1493	0.39	-0.5393	0.688105	AT1G77330.1	2-oxoglutarate (2OG) and Fe(II)-dependent oxygenase superfamily protein
30207250	1	0.1741	0.3878	0.39	-0.0022	0.998476	AT2G26920.1	Ubiquitin-associated/translation elongation factor EF1B protein
30207259	1	0.3327	0.62	0.39	0.23	1.17283
30207419	2	0.9794	-0.00596	0.39	-0.39596	0.759983	AT2G27510.1	ferredoxin 3
30207466	1	0.4579	0.5173	0.39	0.1273	1.09225	AT3G62790.1	NADH-ubiquinone oxidoreductase-related
30207523	2	0.0322	0.366	0.39	-0.024	0.983502	AT1G48840.1	Plant protein of unknown function (DUF639)
30207524	1	0.0073	0.6713	0.39	0.2813	1.21529	AT1G49670.2	ARP protein (REF)
30207536	1	0.2672	0.3881	0.39	-0.0019	0.998684	AT1G17710.1	Pyridoxal phosphate phosphatase-related protein
30207582	5	0.061	0.2712	0.39	-0.1188	0.920953
30207616	9	0.1324	0.1716	0.39	-0.2184	0.859518	AT1G33140.1	Ribosomal protein L6 family
30207618	13	0.0126	0.3006	0.39	-0.0894	0.939914	AT1G65290.1	mitochondrial acyl carrier protein 2
30207626	3	0.3138	0.4066	0.39	0.0166	1.01157	AT2G36230.1	Aldolase-type TIM barrel family protein
30207642	3	0.0242	0.3366	0.39	-0.0534	0.963663	AT4G00570.1	NAD-dependent malic enzyme 2
30207661	1	0.0031	1.0665	0.39	0.6765	1.59826	AT2G32580.1	Protein of unknown function (DUF1068)
30207662	4	0.0006	0.5208	0.39	0.1308	1.0949
30207680	1	0.1776	0.5508	0.39	0.1608	1.11791	AT3G62240.1	RING/U-box superfamily protein
30207716	1	0.0892	0.4314	0.39	0.0414	1.02911	AT3G12050.1	Aha1 domain-containing protein
30207724	1	0.6675	0.1021	0.39	-0.2879	0.819093	AT1G53000.1	Nucleotide-diphospho-sugar transferases superfamily protein
30207734	6	0.0006	0.4653	0.39	0.0753	1.05358	AT4G10260.1	pfkB-like carbohydrate kinase family protein
30207755	3	0.5287	0.2758	0.39	-0.1142	0.923894	AT3G51610.1
30207855	1	0.0093	0.45885	0.39	0.06885	1.04888	AT1G75140.1
30207912	1	0.0999	0.4732	0.39	0.0832	1.05937	AT1G79090.1
30207981	1	0.0636	0.55	0.39	0.16	1.11729	AT2G37040.1	PHE ammonia lyase 1
30207993	2	0.3205	0.2714	0.39	-0.1186	0.921081	AT1G11360.3	Adenine nucleotide alpha hydrolases-like superfamily protein
30208065	3	<.0001	0.45566	0.39	0.06566	1.04656	AT3G62940.3	Cysteine proteinases superfamily protein
30208097	12	<.0001	0.48412	0.39	0.09412	1.06741	AT3G19820.3	cell elongation protein / DWARF1 / DIMINUTO (DIM)
30208099	2	<.0001	1.5482	0.39	1.1582	2.23179	AT5G13930.1	Chalcone and stilbene synthase family protein
30208100	3	0.0171	0.368	0.39	-0.022	0.984866	AT4G14030.2	selenium-binding protein 1
30208153	5	0.0004	0.4266	0.39	0.0366	1.02569	AT2G20560.1	DNAJ heat shock family protein
30208179	4	0.3766	-0.1928	0.39	-0.5828	0.667667	AT5G45390.1	CLP protease P4
30208181	1	0.2892	0.1595	0.39	-0.2305	0.852339	AT3G14470.1	NB-ARC domain-containing disease resistance protein
30208189	3	0.0326	0.3005	0.39	-0.0895	0.939848	AT3G04600.3	Nucleotidylyl transferase superfamily protein
30208198	14	<.0001	0.5032	0.39	0.1132	1.08162	AT3G50660.1	Cytochrome P450 superfamily protein
30208254	2	0.0117	0.8288	0.39	0.4388	1.35548	AT3G09090.1	defective in exine formation protein (DEX1)
30208286	2	0.0548	0.2889	0.39	-0.1011	0.932322	AT4G01560.1	Ribosomal RNA processing Brix domain protein
30208334	1	0.1111	0.6744	0.39	0.2844	1.2179	AT2G05830.1	NagB/RpiA/CoA transferase-like superfamily protein
30208352	13	0.0014	0.3094	0.39	-0.0806	0.945664	AT1G63940.2	monodehydroascorbate reductase 6
30208358	1	0.0472	0.7054	0.39	0.3154	1.24436	AT2G34560.2	P-loop containing nucleoside triphosphate hydrolases superfamily protein
30208361	7	<.0001	0.45564	0.39	0.06564	1.04655	AT5G15090.2	voltage dependent anion channel 3
30208366	5	0.001	0.34536	0.39	-0.04464	0.969532	AT4G22140.1	PHD finger family protein / bromo-adjacent homology (BAH) domain-containing protein
30208401	12	<.0001	0.47736	0.39	0.08736	1.06242	AT1G65680.1	expansin B2
30208403	1	0.5859	-0.2231	0.39	-0.6131	0.65379	AT1G65680.1	expansin B2
30208419	1	0.1747	0.4066	0.39	0.0166	1.01157	AT5G63260.2	Zinc finger C-x8-C-x5-C-x3-H type family protein
30208479	1	0.673	-0.1084	0.39	-0.4984	0.707891	AT4G33420.1	Peroxidase superfamily protein
30208519	3	0.0002	0.5775	0.39	0.1875	1.13879	AT1G74050.1	Ribosomal protein L6 family protein
30208522	1	0.0376	0.3435	0.39	-0.0465	0.968283	AT4G17370.1	Oxidoreductase family protein
30208528	2	0.0027	0.8801	0.39	0.4901	1.40454	AT5G45910.1	GDSL-like Lipase/Acylhydrolase superfamily protein
30208547	4	0.0075	1.1236	0.39	0.7336	1.66278	AT5G62440.1	Protein of unknown function (DUF3223)
30208561	1	0.1096	0.3822	0.39	-0.0078	0.994608	AT5G66590.1	CAP (Cysteine-rich secretory proteins, Antigen 5, and Pathogenesis-related 1 protein) superfamily protein
30208602	1	0.7756	0.07887	0.39	-0.31113	0.80601	AT1G14340.1	RNA-binding (RRM/RBD/RNP motifs) family protein
30208624	11	0.0091	0.19497	0.39	-0.19503	0.873555	AT2G15620.1	nitrite reductase 1
30208629	12	0.2245	0.09368	0.39	-0.29632	0.814327	AT4G14440.1	3-hydroxyacyl-CoA dehydratase 1
30208650	3	0.1433	0.3612	0.39	-0.0288	0.980235	AT4G10300.1	RmlC-like cupins superfamily protein
30208652	1	0.537	0.1252	0.39	-0.2648	0.832314	AT3G17220.1	pectin methylesterase inhibitor 2
30208701	2	0.0338	0.3239	0.39	-0.0661	0.955217	AT5G58490.1	NAD(P)-binding Rossmann-fold superfamily protein
30208713	2	0.1523	0.222	0.39	-0.168	0.890076	AT1G09300.1	Metallopeptidase M24 family protein
30208726	1	0.8467	0.03212	0.39	-0.35788	0.78031	AT1G27090.1	glycine-rich protein
30208775	1	0.2621	0.3399	0.39	-0.0501	0.965869	AT1G65060.1	4-coumarate:CoA ligase 3
30208804	6	0.0405	0.2854	0.39	-0.1046	0.930063	AT5G06860.1	polygalacturonase inhibiting protein 1
30208835	5	0.0328	0.2922	0.39	-0.0978	0.934457	AT5G50920.1	CLPC homologue 1
30208849	1	0.2837	0.2327	0.39	-0.1573	0.896702	AT4G04885.1	PCF11P-similar protein 4
30208865	42	<.0001	0.29267	0.39	-0.09733	0.934761	AT5G54810.1	tryptophan synthase beta-subunit 1
30208948	2	0.0063	0.5854	0.39	0.1954	1.14504	AT3G05420.1	acyl-CoA binding protein 4
30208955	5	0.6888	0.1026	0.39	-0.2874	0.819377	AT3G54900.1	CAX interacting protein 1
30209004	1	0.9592	0.02218	0.39	-0.36782	0.774953	AT3G19010.1	2-oxoglutarate (2OG) and Fe(II)-dependent oxygenase superfamily protein
30209033	6	0.0596	0.2045	0.39	-0.1855	0.879344	AT5G66150.1	Glycosyl hydrolase family 38 protein
30209041	14	<.0001	0.39302	0.39	0.00302	1.0021	AT1G35780.1
30209055	1	0.0913	0.3688	0.39	-0.0212	0.985413	AT4G36860.1	LIM domain-containing protein
30209077	13	<.0001	0.63007	0.39	0.24007	1.18105	AT5G02960.1	Ribosomal protein S12/S23 family protein
30209089	2	0.8422	-0.05108	0.39	-0.44108	0.736583	AT5G67500.2	voltage dependent anion channel 2
30209092	6	0.0051	0.304	0.39	-0.086	0.942131	AT1G13690.1	ATPase E1
30209098	4	0.0059	0.508	0.39	0.118	1.08523	AT5G27410.2	D-aminoacid aminotransferase-like PLP-dependent enzymes superfamily protein
30209110	2	0.864	0.05373	0.39	-0.33627	0.792087	AT3G57090.1	Tetratricopeptide repeat (TPR)-like superfamily protein
30209120	1	0.3461	0.2372	0.39	-0.1528	0.899503	AT4G35090.1	catalase 2
30209135	1	0.2847	0.8234	0.39	0.4334	1.35041	AT2G35790.1
30209150	4	0.0211	0.3697	0.39	-0.0203	0.986028	AT5G16820.2	heat shock factor 3
30209175	4	0.1908	0.2157	0.39	-0.1743	0.886197	AT4G14300.1	RNA-binding (RRM/RBD/RNP motifs) family protein
30209179	1	0.1389	0.6232	0.39	0.2332	1.17544	AT1G24450.1	Ribonuclease III family protein
30209189	2	0.3578	0.1995	0.39	-0.1905	0.876302	AT1G17020.1	senescence-related gene 1
30209195	7	0.8086	-0.03867	0.39	-0.42867	0.742946	AT1G17180.1	glutathione S-transferase TAU 25
30209219	1	0.0286	0.593	0.39	0.203	1.15109	AT3G29090.1	pectin methylesterase 31
30209235	2	0.8731	-0.04221	0.39	-0.43221	0.741126	AT5G53490.1	Tetratricopeptide repeat (TPR)-like superfamily protein
30209281	3	0.6478	0.1083	0.39	-0.2817	0.822621	AT2G38680.1	5\'-nucleotidases;magnesium ion binding
30209287	2	0.007	0.6038	0.39	0.2138	1.15974	AT3G11450.1	DnaJ domain ;Myb-like DNA-binding domain
30209315	4	0.0038	0.3792	0.39	-0.0108	0.992542	AT5G05440.1	Polyketide cyclase/dehydrase and lipid transport superfamily protein
30209330	1	0.1362	0.3288	0.39	-0.0612	0.958467	AT2G02040.1	peptide transporter 2
30209370	6	0.1636	0.1816	0.39	-0.2084	0.865497	AT5G38900.1	Thioredoxin superfamily protein
30209404	1	0.0751	0.8427	0.39	0.4527	1.3686	AT1G66590.1	cytochrome c oxidase 19-1
30209413	1	0.4726	0.2824	0.39	-0.1076	0.928131	AT4G05410.1	Transducin/WD40 repeat-like superfamily protein
30209419	2	0.3552	0.2433	0.39	-0.1467	0.903314	AT1G07980.1	nuclear factor Y, subunit C10
30209444	1	0.631	0.3108	0.39	-0.0792	0.946582	AT5G47550.1	Cystatin/monellin superfamily protein
30209464	3	0.0252	0.8642	0.39	0.4742	1.38915	AT2G04520.1	Nucleic acid-binding, OB-fold-like protein
30209495	1	0.405	0.4884	0.39	0.0984	1.07059	AT2G13840.1	Polymerase/histidinol phosphatase-like
30209499	5	0.486	0.1114	0.39	-0.2786	0.824391	AT4G37930.1	serine transhydroxymethyltransferase 1
30209519	28	<.0001	0.37592	0.39	-0.01408	0.990288	AT5G59950.5	RNA-binding (RRM/RBD/RNP motifs) family protein
30209585	2	0.4853	0.1863	0.39	-0.2037	0.868321	AT5G66005.3	Expressed protein
30209643	1	0.0365	0.5827	0.39	0.1927	1.1429	AT3G22300.1	ribosomal protein S10
30209647	1	0.4206	0.2381	0.39	-0.1519	0.900064	AT1G07410.1	RAB GTPase homolog A2B
30209664	1	0.6498	0.1045	0.39	-0.2855	0.820457	AT1G54390.2	PHD finger protein-related
30209683	4	0.0021	0.4141	0.39	0.0241	1.01685
30209688	1	0.2766	0.3284	0.39	-0.0616	0.958201	AT5G66730.1	C2H2-like zinc finger protein
30209719	1	0.0094	0.6667	0.39	0.2767	1.21142	AT3G55340.1	phragmoplastin interacting protein 1
30209725	6	0.0429	0.2624	0.39	-0.1276	0.915353	AT4G14710.1	RmlC-like cupins superfamily protein
30209733	3	0.0064	0.42	0.39	0.03	1.02101	AT4G34490.1	cyclase associated protein 1
30209735	1	0.4501	0.2227	0.39	-0.1673	0.890508	AT3G60810.1
30209738	1	0.8771	0.03773	0.39	-0.35227	0.783351	AT2G16760.1	Calcium-dependent phosphotriesterase superfamily protein
30209740	1	0.2741	0.297	0.39	-0.093	0.937571	AT4G16420.1	homolog of yeast ADA2 2B
30209754	1	0.0774	0.7012	0.39	0.3112	1.24074	AT5G60920.1	COBRA-like extracellular glycosyl-phosphatidyl inositol-anchored protein family
30209765	2	0.029	0.2845	0.39	-0.1055	0.929483	AT3G07030.1	Alba DNA/RNA-binding protein
30209771	1	0.1732	0.3091	0.39	-0.0809	0.945468	AT5G59250.1	Major facilitator superfamily protein
30209772	70	<.0001	0.44535	0.39	0.05535	1.03911	AT5G37510.2	NADH-ubiquinone dehydrogenase, mitochondrial, putative
30209777	1	0.444	0.1912	0.39	-0.1988	0.871275	AT2G17510.1	ribonuclease II family protein
30209780	3	0.0009	0.4631	0.39	0.0731	1.05197	AT5G15180.1	Peroxidase superfamily protein
30209831	8	0.0001	0.4442	0.39	0.0542	1.03828	AT3G22600.1	Bifunctional inhibitor/lipid-transfer protein/seed storage 2S albumin superfamily protein
30209854	2	0.0001	0.50994	0.39	0.11994	1.08669	AT5G02970.1	alpha/beta-Hydrolases superfamily protein
30209856	2	0.0745	0.3966	0.39	0.0066	1.00459	AT4G33950.1	Protein kinase superfamily protein
30209863	2	0.1721	0.4658	0.39	0.0758	1.05395
30209866	1	0.3914	0.1129	0.39	-0.2771	0.825248	AT3G22980.1	Ribosomal protein S5/Elongation factor G/III/V family protein
30209886	2	0.5123	0.1181	0.39	-0.2719	0.828228	AT1G71440.1	tubulin folding cofactor E / Pfifferling (PFI)
30209911	2	0.0272	0.3034	0.39	-0.0866	0.94174	AT4G34270.1	TIP41-like family protein
30209915	2	0.7558	0.05399	0.39	-0.33601	0.792229	AT1G79010.1	Alpha-helical ferredoxin
30209935	1	0.6521	0.2106	0.39	-0.1794	0.88307	AT1G17330.1	Metal-dependent phosphohydrolase
30209942	1	0.5929	0.207	0.39	-0.183	0.880869	AT5G20930.1	Protein kinase superfamily protein
30209950	1	0.9911	-0.01665	0.39	-0.40665	0.754373	AT3G13440.1	S-adenosyl-L-methionine-dependent methyltransferases superfamily protein
30209952	1	0.8048	0.05198	0.39	-0.33802	0.791126	AT5G67450.1	zinc-finger protein 1
30210019	1	0.8601	0.05092	0.39	-0.33908	0.790545	AT4G02340.1	alpha/beta-Hydrolases superfamily protein
30210043	5	0.0134	0.4551	0.39	0.0651	1.04616	AT1G20760.1	Calcium-binding EF hand family protein
30210061	2	0.3627	0.2804	0.39	-0.1096	0.926845	AT3G46220.1
30210076	8	0.0036	0.28187	0.39	-0.10813	0.92779	AT2G43120.1	RmlC-like cupins superfamily protein
30210086	1	0.0788	0.6684	0.39	0.2784	1.21285	AT1G63800.1	ubiquitin-conjugating enzyme 5
30210100	2	0.1716	0.3216	0.39	-0.0684	0.953695	AT5G37480.1
30210102	2	<.0001	0.61208	0.39	0.22208	1.16641	AT5G38640.1	NagB/RpiA/CoA transferase-like superfamily protein
30210106	2	0.1217	0.3424	0.39	-0.0476	0.967545	AT3G17940.1	Galactose mutarotase-like superfamily protein
30210143	2	0.7177	-0.1174	0.39	-0.5074	0.703489	AT5G58230.1	Transducin/WD40 repeat-like superfamily protein
30210162	2	0.0153	0.4787	0.39	0.0887	1.06341	AT5G55640.1
30210166	2	0.0649	0.3765	0.39	-0.0135	0.990686	AT1G65680.1	expansin B2
30210179	1	0.1229	0.6173	0.39	0.2273	1.17064	AT3G45850.1	P-loop containing nucleoside triphosphate hydrolases superfamily protein
30210196	1	0.0149	0.8594	0.39	0.4694	1.38453	AT5G05580.1	fatty acid desaturase 8
30210205	8	0.0009	0.3555	0.39	-0.0345	0.97637	AT3G04610.1	RNA-binding KH domain-containing protein
30210224	2	0.3464	-0.3607	0.39	-0.7507	0.594315	AT1G10360.1	glutathione S-transferase TAU 18
30210265	1	0.006	0.9359	0.39	0.5459	1.45993
30210269	5	0.0527	0.2278	0.39	-0.1622	0.893661	AT1G14810.1	semialdehyde dehydrogenase family protein
30210278	1	0.7898	0.1015	0.39	-0.2885	0.818753	AT5G44450.1	methyltransferases
30210290	1	0.0303	0.5678	0.39	0.1778	1.13116	AT3G22190.2	IQ-domain 5
30210291	7	0.0012	0.3525	0.39	-0.0375	0.974342	AT2G17190.1	ubiquitin family protein
30210295	3	0.0007	0.5544	0.39	0.1644	1.1207	AT4G34940.1	armadillo repeat only 1
30210303	1	0.4363	0.3189	0.39	-0.0711	0.951912	AT3G55530.1	RING/U-box superfamily protein
30210328	10	<.0001	0.4062	0.39	0.0162	1.01129	AT5G05980.1	DHFS-FPGS homolog B
30210331	4	0.9298	-0.01168	0.39	-0.40168	0.756976	AT3G18610.1	nucleolin like 2
30210339	6	0.0005	0.5542	0.39	0.1642	1.12054	AT4G24840.1
30210341	5	0.0003	0.4151	0.39	0.0251	1.01755	AT3G04930.1	DNA-binding storekeeper protein-related transcriptional regulator
30210343	10	0.0021	0.479	0.39	0.089	1.06363	AT5G27700.1	Ribosomal protein S21e
30210353	7	0.0015	0.3716	0.39	-0.0184	0.987327	AT4G09670.1	Oxidoreductase family protein
30210355	6	0.9197	0.01722	0.39	-0.37278	0.772293	AT4G15940.1	Fumarylacetoacetate (FAA) hydrolase family
30210367	1	0.2018	0.3755	0.39	-0.0145	0.99	AT5G40020.1	Pathogenesis-related thaumatin superfamily protein
30210389	9	0.0007	0.4478	0.39	0.0578	1.04088	AT5G27470.1	seryl-tRNA synthetase / serine--tRNA ligase
30210408	4	0.0463	0.2297	0.39	-0.1603	0.894839	AT4G29250.1	HXXXD-type acyl-transferase family protein
30210465	4	<.0001	1.3581	0.39	0.9681	1.95626	AT1G54410.1	dehydrin family protein
30210489	2	0.1615	0.2066	0.39	-0.1834	0.880625	AT5G61510.1	GroES-like zinc-binding alcohol dehydrogenase family protein
30210495	1	0.0427	1.2102	0.39	0.8202	1.76565	AT4G05400.2	copper ion binding
30210498	2	0.0733	0.3156	0.39	-0.0744	0.949737	AT2G32090.1	Lactoylglutathione lyase / glyoxalase I family protein
30210501	1	0.2426	0.513	0.39	0.123	1.089	AT3G24315.1	Sec20 family protein
30210536	11	<.0001	0.60625	0.39	0.21625	1.16171	AT2G40320.1	TRICHOME BIREFRINGENCE-LIKE 33
30210551	7	0.7078	0.09526	0.39	-0.29474	0.815219	AT2G34690.1	Glycolipid transfer protein (GLTP) family protein
30210555	2	0.0921	0.6121	0.39	0.2221	1.16643	AT4G19120.2	S-adenosyl-L-methionine-dependent methyltransferases superfamily protein
30210592	2	0.8933	0.06612	0.39	-0.32388	0.798918	AT2G15860.1
30210594	1	0.0592	0.4914	0.39	0.1014	1.07281	AT4G39050.1	Kinesin motor family protein
30210601	33	<.0001	0.48284	0.39	0.09284	1.06647	AT5G62300.2	Ribosomal protein S10p/S20e family protein
30210609	1	0.0794	0.6153	0.39	0.2253	1.16902	AT3G17440.1	novel plant snare 13
30210620	9	<.0001	0.43301	0.39	0.04301	1.03026	AT5G21950.1	alpha/beta-Hydrolases superfamily protein
30210623	3	0.0174	0.4252	0.39	0.0352	1.0247	AT1G65680.1	expansin B2
30210641	1	0.0467	0.5994	0.39	0.2094	1.15621	AT1G12740.1	cytochrome P450, family 87, subfamily A, polypeptide 2
30210678	2	0.055	0.3381	0.39	-0.0519	0.964665	AT5G35840.1	phytochrome C
30210700	5	0.0002	0.4665	0.39	0.0765	1.05446	AT5G05920.1	deoxyhypusine synthase
30210701	12	0.0056	0.3418	0.39	-0.0482	0.967142	AT2G27510.1	ferredoxin 3
30210712	3	0.0364	0.3507	0.39	-0.0393	0.973127	AT2G30200.1	catalytics;transferases;[acyl-carrier-protein] S-malonyltransferases;binding
30210722	1	0.1048	0.3504	0.39	-0.0396	0.972925	AT4G13580.1	Disease resistance-responsive (dirigent-like protein) family protein
30210753	2	0.0119	0.5049	0.39	0.1149	1.0829	AT3G58580.1	DNAse I-like superfamily protein
30210796	3	0.0655	0.2741	0.39	-0.1159	0.922806	AT5G42180.1	Peroxidase superfamily protein
30210801	59	<.0001	0.30847	0.39	-0.08153	0.945055	AT5G50950.2	FUMARASE 2
30210813	41	<.0001	0.35618	0.39	-0.03382	0.97683	AT5G17920.2	Cobalamin-independent synthase family protein
30210814	1	0.2087	0.3051	0.39	-0.0849	0.94285	AT2G41900.1	CCCH-type zinc finger protein with ARM repeat domain
30210821	1	0.5344	0.2024	0.39	-0.1876	0.878065	AT2G37500.1	arginine biosynthesis protein ArgJ family
30210874	2	0.6622	0.08979	0.39	-0.30021	0.812134	AT5G52840.1	NADH-ubiquinone oxidoreductase-related
30210900	5	0.0037	0.3935	0.39	0.0035	1.00243	AT5G41410.1	POX (plant homeobox) family protein
30210902	2	0.0217	0.7115	0.39	0.3215	1.24963	AT3G62370.1	heme binding
30210908	8	0.0006	0.387	0.39	-0.003	0.997923	AT5G05000.1	translocon at the outer envelope membrane of chloroplasts 34
30210910	1	0.1052	0.7997	0.39	0.4097	1.32841	AT1G16210.1
30210912	1	0.193	0.3993	0.39	0.0093	1.00647	AT5G42510.1	Disease resistance-responsive (dirigent-like protein) family protein
30210919	1	0.0637	0.4543	0.39	0.0643	1.04558	AT2G02850.1	plantacyanin
30210942	22	<.0001	0.48291	0.39	0.09291	1.06652	AT2G15480.2	UDP-glucosyl transferase 73B5
30210943	4	0.0223	0.3653	0.39	-0.0247	0.983025	AT5G58220.1	transthyretin-like protein
30210963	1	0.0036	0.40946	0.39	0.01946	1.01358	AT2G30630.2	P-loop containing nucleoside triphosphate hydrolases superfamily protein
30210991	3	0.3079	0.1637	0.39	-0.2263	0.854824	AT3G60190.1	DYNAMIN-like 1E
30210996	2	0.0956	0.4249	0.39	0.0349	1.02449	AT3G04830.1	Protein prenylyltransferase superfamily protein
30211006	4	0.0054	0.3643	0.39	-0.0257	0.982344	AT3G50370.1
30211015	1	0.16	0.5988	0.39	0.2088	1.15573	AT1G14870.1	PLANT CADMIUM RESISTANCE 2
30211046	1	0.1321	0.4854	0.39	0.0954	1.06836	AT3G02660.1	Tyrosyl-tRNA synthetase, class Ib, bacterial/mitochondrial
30211062	1	0.0639	0.8832	0.39	0.4932	1.40756	AT3G13200.1	Cwf15 / Cwc15 cell cycle control family protein
30211091	2	0.02	0.4204	0.39	0.0304	1.0213	AT1G04130.1	Tetratricopeptide repeat (TPR)-like superfamily protein
30211097	2	0.5291	0.2238	0.39	-0.1662	0.891187	AT2G29690.1	anthranilate synthase 2
30211098	6	0.0005	0.29663	0.39	-0.09337	0.937331	AT4G22110.2	GroES-like zinc-binding dehydrogenase family protein
30211105	5	0.0022	0.4803	0.39	0.0903	1.06459	AT2G44860.2	Ribosomal protein L24e family protein
30211112	7	<.0001	0.7136	0.39	0.3236	1.25145	AT3G48890.1	membrane-associated progesterone binding protein 3
30211114	2	0.048	0.4262	0.39	0.0362	1.02541	AT1G48850.1	chorismate synthase, putative / 5-enolpyruvylshikimate-3-phosphate phospholyase, putative
30211153	1	0.7975	-0.1872	0.39	-0.5772	0.670263	AT3G07300.2	NagB/RpiA/CoA transferase-like superfamily protein
30211162	7	<.0001	1.412	0.39	1.022	2.03073	AT5G23760.1	Copper transport protein family
30211168	1	0.0117	0.5274	0.39	0.1374	1.09992	AT5G35590.1	proteasome alpha subunit A1
30211174	11	0.1146	0.2423	0.39	-0.1477	0.902688	AT2G23930.1	probable small nuclear ribonucleoprotein G
30211214	1	0.1884	0.4141	0.39	0.0241	1.01685	AT2G47140.1	NAD(P)-binding Rossmann-fold superfamily protein
30211230	9	0.0334	0.3285	0.39	-0.0615	0.958267	AT3G06610.1	DNA-binding enhancer protein-related
30211241	3	0.0164	0.359	0.39	-0.031	0.978742	AT5G36160.1	Tyrosine transaminase family protein
30211245	7	0.2824	0.1691	0.39	-0.2209	0.85803	AT5G22060.1	DNAJ homologue 2
30211282	8	0.0754	0.2345	0.39	-0.1555	0.897821	AT1G56050.1	GTP-binding protein-related
30211286	2	0.0017	0.4369	0.39	0.0469	1.03304	AT3G02875.1	Peptidase M20/M25/M40 family protein
30211299	4	0.0244	0.3374	0.39	-0.0526	0.964197	AT2G28470.1	beta-galactosidase 8
30211338	4	0.6102	0.05247	0.39	-0.33753	0.791395	AT2G28000.1	chaperonin-60alpha
30211395	4	0.0021	0.5045	0.39	0.1145	1.0826	AT4G36220.1	ferulic acid 5-hydroxylase 1
30211407	6	0.008	0.3102	0.39	-0.0798	0.946189	AT3G18190.1	TCP-1/cpn60 chaperonin family protein
30211414	1	0.0243	0.5091	0.39	0.1191	1.08606	AT2G26890.1	DNAJ heat shock N-terminal domain-containing protein
30211421	2	0.0002	0.5676	0.39	0.1776	1.131	AT3G22750.1	Protein kinase superfamily protein
30211425	2	0.0252	0.3708	0.39	-0.0192	0.98678	AT1G09870.1	histidine acid phosphatase family protein
30211460	1	0.4368	0.3968	0.39	0.0068	1.00472	AT5G60940.1	Transducin/WD40 repeat-like superfamily protein
30211469	7	0.0002	0.36812	0.39	-0.02188	0.984948	AT5G46750.1	ARF-GAP domain 9
30211477	4	0.0007	0.7952	0.39	0.4052	1.32427	AT4G35300.1	tonoplast monosaccharide transporter2
30211482	5	0.0112	0.2921	0.39	-0.0979	0.934392	AT5G16760.1	Inositol 1,3,4-trisphosphate 5/6-kinase family protein
30211493	4	0.8071	-0.05524	0.39	-0.44524	0.734462	AT5G27640.1	translation initiation factor 3B1
30211504	6	0.0002	0.4711	0.39	0.0811	1.05782	AT2G47390.1	Prolyl oligopeptidase family protein
30211523	1	0.4273	0.2743	0.39	-0.1157	0.922934	AT4G17330.1	G2484-1 protein
30211547	2	0.0069	0.6514	0.39	0.2614	1.19864	AT5G67270.1	end binding protein 1C
30211554	2	0.0043	0.6268	0.39	0.2368	1.17838	AT5G20950.1	Glycosyl hydrolase family protein
30211597	1	0.0516	0.3261	0.39	-0.0639	0.956674	AT2G32020.1	Acyl-CoA N-acyltransferases (NAT) superfamily protein
30211637	5	0.0001	0.5246	0.39	0.1346	1.09779	AT1G65680.1	expansin B2
30211640	14	0.505	0.04516	0.39	-0.34484	0.787395	AT1G21680.1	DPP6 N-terminal domain-like protein
30211655	5	0.0008	0.4533	0.39	0.0633	1.04485	AT1G13950.1	eukaryotic elongation factor 5A-1
30211680	1	0.1807	0.5156	0.39	0.1256	1.09096	AT3G55090.1	ABC-2 type transporter family protein
30211698	2	0.0541	0.3007	0.39	-0.0893	0.939979	AT2G26280.1	CTC-interacting domain 7
30211719	1	0.2862	0.3922	0.39	0.0022	1.00153	AT4G18590.1	Nucleic acid-binding, OB-fold-like protein
30211729	1	0.0737	0.5185	0.39	0.1285	1.09316	AT1G05430.1
30211733	3	0.0604	0.3504	0.39	-0.0396	0.972925	AT3G55770.5	GATA type zinc finger transcription factor family protein
30211741	6	0.003	0.4017	0.39	0.0117	1.00814
30211752	1	0.3806	0.2496	0.39	-0.1404	0.907268	AT1G72320.1	pumilio 23
30211769	2	0.2103	0.3029	0.39	-0.0871	0.941413	AT1G09795.1	ATP phosphoribosyl transferase 2
30211770	4	<.0001	0.48218	0.39	0.09218	1.06598	AT2G27210.1	BRI1 suppressor 1 (BSU1)-like 3
30211791	8	<.0001	0.9015	0.39	0.5115	1.42553	AT3G18480.1	CCAAT-displacement protein alternatively spliced product
30211799	1	0.1871	0.6534	0.39	0.2634	1.2003	AT5G18110.1	novel cap-binding protein
30211812	6	0.3845	0.111	0.39	-0.279	0.824162	AT5G28050.1	Cytidine/deoxycytidylate deaminase family protein
30211819	9	0.0028	0.3586	0.39	-0.0314	0.97847	AT4G17870.1	Polyketide cyclase/dehydrase and lipid transport superfamily protein
30211830	1	0.22	0.2569	0.39	-0.1331	0.91187	AT3G10690.1	DNA GYRASE A
30211841	9	<.0001	1.0074	0.39	0.6174	1.53411	AT3G43980.1	Ribosomal protein S14p/S29e family protein
30211878	3	0.005	0.4494	0.39	0.0594	1.04203	AT2G38560.1	transcript elongation factor IIS
30211892	1	0.1099	0.5347	0.39	0.1447	1.1055	AT3G51430.1	Calcium-dependent phosphotriesterase superfamily protein
30211910	1	0.3546	0.3047	0.39	-0.0853	0.942589	AT5G27820.1	Ribosomal L18p/L5e family protein
30211917	6	0.195	0.12871	0.39	-0.26129	0.834342	AT5G12040.1	Nitrilase/cyanide hydratase and apolipoprotein N-acyltransferase family protein
30211925	1	0.132	0.3357	0.39	-0.0543	0.963062	AT1G30620.2	NAD(P)-binding Rossmann-fold superfamily protein
30211927	2	0.0936	0.6843	0.39	0.2943	1.22629	AT1G17020.1	senescence-related gene 1
30211961	5	0.0039	0.5054	0.39	0.1154	1.08328	AT1G61870.1	pentatricopeptide repeat 336
30211966	1	0.5701	0.2481	0.39	-0.1419	0.906325	AT5G61190.1	putative endonuclease or glycosyl hydrolase with C2H2-type zinc finger domain
30211985	1	0.228	0.7369	0.39	0.3469	1.27182	AT3G48750.1	cell division control 2
30211990	1	0.663	0.2316	0.39	-0.1584	0.896018	AT5G46800.1	Mitochondrial substrate carrier family protein
30212033	23	<.0001	0.32736	0.39	-0.06264	0.95751	AT3G02090.1	Insulinase (Peptidase family M16) protein
30212034	2	0.0471	0.7133	0.39	0.3233	1.25119	AT5G37690.1	SGNH hydrolase-type esterase superfamily protein
30212050	29	<.0001	0.43865	0.39	0.04865	1.0343	AT2G17980.1	Sec1/munc18-like (SM) proteins superfamily
30212070	1	0.4564	0.521	0.39	0.131	1.09505	AT1G75560.2	zinc knuckle (CCHC-type) family protein
30212081	1	0.3813	0.3006	0.39	-0.0894	0.939914	AT5G18230.1	transcription regulator NOT2/NOT3/NOT5 family protein
30212084	1	0.8258	-0.0941	0.39	-0.4841	0.714943	AT1G64940.1	cytochrome P450, family 87, subfamily A, polypeptide 6
30212127	1	0.2226	0.4549	0.39	0.0649	1.04601	AT1G50570.2	Calcium-dependent lipid-binding (CaLB domain) family protein
30212147	1	0.0487	0.4032	0.39	0.0132	1.00919	AT1G75210.1	HAD-superfamily hydrolase, subfamily IG, 5\'-nucleotidase
30212157	5	0.9753	0.004374	0.39	-0.385626	0.765447	AT3G23490.1	cyanase
30212173	17	<.0001	0.34809	0.39	-0.04191	0.971368	AT3G14750.1
30212180	3	0.0005	0.40437	0.39	0.01437	1.01001	AT3G10050.1	L-O-methylthreonine resistant 1
30212184	2	0.0019	1.3603	0.39	0.9703	1.95925	AT5G62440.1	Protein of unknown function (DUF3223)
30212221	4	0.4729	-0.2394	0.39	-0.6294	0.646445	AT4G28390.1	ADP/ATP carrier 3
30212223	2	0.082	0.4241	0.39	0.0341	1.02392	AT3G50845.1	Protein of unknown function (DUF59)
30212234	2	0.0156	0.4691	0.39	0.0791	1.05636	AT5G63840.1	Glycosyl hydrolases family 31 protein
30212270	5	0.1199	0.3013	0.39	-0.0887	0.94037	AT1G47710.1	Serine protease inhibitor (SERPIN) family protein
30212273	2	0.2805	0.2176	0.39	-0.1724	0.887365	AT3G55120.1	Chalcone-flavanone isomerase family protein
30212291	1	0.0643	0.972	0.39	0.582	1.49692	AT3G54700.1	phosphate transporter 1;7
30212303	2	0.0143	0.5619	0.39	0.1719	1.12654	AT3G09350.1	Fes1A
30212304	2	0.0566	1.7192	0.39	1.3292	2.51263	AT5G60920.1	COBRA-like extracellular glycosyl-phosphatidyl inositol-anchored protein family
30212308	1	0.3189	0.2555	0.39	-0.1345	0.910986	AT2G38710.1	AMMECR1 family
30212317	1	0.4766	0.1958	0.39	-0.1942	0.874057	AT4G07990.1	Chaperone DnaJ-domain superfamily protein
30212320	1	0.0437	0.494	0.39	0.104	1.07475	AT1G29940.1	nuclear RNA polymerase A2
30212357	18	<.0001	1.0358	0.39	0.6458	1.56461	AT2G44060.1	Late embryogenesis abundant protein, group 2
30212371	2	0.0136	0.5042	0.39	0.1142	1.08237	AT2G47960.1
30212378	10	0.1197	0.2116	0.39	-0.1784	0.883682	AT2G37660.1	NAD(P)-binding Rossmann-fold superfamily protein
30212379	5	0.076	0.2086	0.39	-0.1814	0.881847	AT5G63890.1	histidinol dehydrogenase
30212382	4	0.0006	0.4631	0.39	0.0731	1.05197	AT2G28380.1	dsRNA-binding protein 2
30212394	14	0.0659	0.3586	0.39	-0.0314	0.97847	AT3G15790.1	methyl-CPG-binding domain 11
30212405	2	0.2786	0.5576	0.39	0.1676	1.12319	AT5G06720.1	peroxidase 2
30212406	1	0.1638	0.6109	0.39	0.2209	1.16546	AT5G59610.1	Chaperone DnaJ-domain superfamily protein
30212429	1	0.1368	0.4849	0.39	0.0949	1.06799	AT2G25430.1	epsin N-terminal homology (ENTH) domain-containing protein / clathrin assembly protein-related
30212434	1	0.0223	0.5576	0.39	0.1676	1.12319	AT4G36195.1	Serine carboxypeptidase S28 family protein
30212435	2	0.17	0.3575	0.39	-0.0325	0.977725	AT2G33255.1	Haloacid dehalogenase-like hydrolase (HAD) superfamily protein
30212453	4	0.9556	0.0134	0.39	-0.3766	0.770251	AT5G04280.1	RNA-binding (RRM/RBD/RNP motifs) family protein with retrovirus zinc finger-like domain
30212463	1	0.5124	0.2083	0.39	-0.1817	0.881663	AT5G47430.1	DWNN domain, a CCHC-type zinc finger
30212506	3	0.0086	0.3426	0.39	-0.0474	0.967679	AT1G23260.1	MMS ZWEI homologue 1
30212510	2	0.0454	0.7356	0.39	0.3456	1.27068	AT1G54140.1	TATA binding protein associated factor 21kDa subunit
30212523	4	<.0001	0.8496	0.39	0.4596	1.37516	AT5G39850.1	Ribosomal protein S4
30212561	1	0.0635	0.4175	0.39	0.0275	1.01924	AT5G66290.1
30212584	1	0.2399	0.3002	0.39	-0.0898	0.939653	AT5G07980.1	dentin sialophosphoprotein-related
30212609	6	0.1157	0.1966	0.39	-0.1934	0.874542	AT3G08860.1	PYRIMIDINE 4
30212618	11	0.0012	0.4016	0.39	0.0116	1.00807	AT2G30880.1	Pleckstrin homology (PH) domain-containing protein
30212639	4	0.456	0.1024	0.39	-0.2876	0.819264	AT2G19860.1	hexokinase 2
30212665	1	0.0996	0.6838	0.39	0.2938	1.22586	AT5G51840.1
30212672	2	0.3303	0.2413	0.39	-0.1487	0.902063	AT3G62720.2	xylosyltransferase 1
30212699	2	0.0126	0.701	0.39	0.311	1.24057	AT2G35460.1	Late embryogenesis abundant (LEA) hydroxyproline-rich glycoprotein family
30212700	2	0.0729	0.3447	0.39	-0.0453	0.969088	AT1G17420.1	lipoxygenase 3
30212701	1	0.2712	0.2243	0.39	-0.1657	0.891496	AT2G32700.6	LEUNIG_homolog
30212707	4	0.0128	0.3487	0.39	-0.0413	0.971779	AT4G21860.1	methionine sulfoxide reductase B 2
30212712	1	0.8662	0.03856	0.39	-0.35144	0.783801	AT5G52810.1	NAD(P)-binding Rossmann-fold superfamily protein
30212713	4	0.0031	0.4425	0.39	0.0525	1.03706	AT3G16760.1	Tetratricopeptide repeat (TPR)-like superfamily protein
30212718	1	0.8775	0.04329	0.39	-0.34671	0.786375	AT2G33700.1	Protein phosphatase 2C family protein
30212722	5	0.0868	0.251	0.39	-0.139	0.908148	AT4G35630.1	phosphoserine aminotransferase
30212728	2	0.4458	0.2056	0.39	-0.1844	0.880015	AT3G28450.1	Leucine-rich repeat protein kinase family protein
30212741	13	<.0001	0.28802	0.39	-0.10198	0.931753	AT2G44160.1	methylenetetrahydrofolate reductase 2
30212771	1	0.7293	0.193	0.39	-0.197	0.872363	AT2G20330.1	Transducin/WD40 repeat-like superfamily protein
30212774	1	0.008	0.9057	0.39	0.5157	1.42969	AT2G40510.1	Ribosomal protein S26e family protein
30212795	1	0.204	0.3537	0.39	-0.0363	0.975153	AT2G38940.1	phosphate transporter 1;4
30212799	1	0.3328	0.1996	0.39	-0.1904	0.876363	AT3G29185.1	Domain of unknown function (DUF3598)
30212801	2	0.8289	0.02527	0.39	-0.36473	0.776614	AT1G50940.1	electron transfer flavoprotein alpha
30212803	4	0.0254	0.4089	0.39	0.0189	1.01319	AT5G15270.1	RNA-binding KH domain-containing protein
30212809	3	0.1814	0.1881	0.39	-0.2019	0.869405	AT2G27920.1	serine carboxypeptidase-like 51
30212818	4	0.7006	-0.05509	0.39	-0.44509	0.734538	AT4G29040.1	regulatory particle AAA-ATPase 2A
30212822	2	0.3908	0.2786	0.39	-0.1114	0.925689	AT1G05190.1	Ribosomal protein L6 family
30212853	4	0.0964	0.2813	0.39	-0.1087	0.927423	AT4G04860.1	DERLIN-2.2
30212873	6	0.2233	-0.241	0.39	-0.631	0.645729	AT5G03340.1	ATPase, AAA-type, CDC48 protein
30212909	6	0.0032	0.384	0.39	-0.006	0.99585	AT1G17020.1	senescence-related gene 1
30212912	12	0.0009	0.3081	0.39	-0.0819	0.944813	AT3G22430.1
30212933	3	0.1133	0.2872	0.39	-0.1028	0.931224	AT1G50510.1	indigoidine synthase A family protein
30212935	4	0.0032	0.4814	0.39	0.0914	1.0654	AT3G04770.2	40s ribosomal protein SA B
30212941	1	0.0579	0.4122	0.39	0.0222	1.01551	AT3G44150.1
30212945	2	0.9776	-0.004308	0.39	-0.394308	0.760854	AT3G01980.4	NAD(P)-binding Rossmann-fold superfamily protein
30212989	1	0.2651	0.2817	0.39	-0.1083	0.927681	AT5G16120.2	alpha/beta-Hydrolases superfamily protein
30213001	1	0.1087	0.4115	0.39	0.0215	1.01501	AT1G61010.3	cleavage and polyadenylation specificity factor 73-I
30213020	1	0.0169	0.8719	0.39	0.4819	1.39658	AT5G13280.1	aspartate kinase 1
30213033	20	<.0001	0.44761	0.39	0.05761	1.04074	AT5G54900.1	RNA-binding protein 45A
30213037	1	0.0012	0.62346	0.39	0.23346	1.17565	AT4G22460.1	Bifunctional inhibitor/lipid-transfer protein/seed storage 2S albumin superfamily protein
30213049	1	0.0583	0.5647	0.39	0.1747	1.12873	AT5G02740.1	Ribosomal protein S24e family protein
30213052	1	0.0215	0.7667	0.39	0.3767	1.29837	AT2G42520.1	P-loop containing nucleoside triphosphate hydrolases superfamily protein
30213073	9	<.0001	0.9871	0.39	0.5971	1.51267	AT1G62020.1	Coatomer, alpha subunit
30213093	2	0.077	0.2706	0.39	-0.1194	0.92057	AT1G17840.1	white-brown complex homolog protein 11
30213095	4	0.1196	0.2558	0.39	-0.1342	0.911175	AT4G09670.1	Oxidoreductase family protein
30213100	1	0.6607	0.1713	0.39	-0.2187	0.859339	AT3G06580.1	Mevalonate/galactokinase family protein
30213104	1	0.051	0.6559	0.39	0.2659	1.20239	AT1G78570.1	rhamnose biosynthesis 1
30213121	1	0.832	0.1219	0.39	-0.2681	0.830412	AT2G37020.1	Translin family protein
30213160	9	<.0001	0.40927	0.39	0.01927	1.01345	AT1G14710.2	hydroxyproline-rich glycoprotein family protein
30213170	1	0.7276	0.07638	0.39	-0.31362	0.80462	AT3G18610.1	nucleolin like 2
30213207	2	0.4188	0.186	0.39	-0.204	0.86814	AT4G27670.1	heat shock protein 21
30213222	5	<.0001	0.9819	0.39	0.5919	1.50723	AT4G19150.1	Ankyrin repeat family protein
30213249	3	0.3357	0.1718	0.39	-0.2182	0.859637	AT2G34250.2	SecY protein transport family protein
30213251	1	0.0572	0.976	0.39	0.586	1.50108	AT1G13330.1	Arabidopsis Hop2 homolog
30213262	2	0.9296	0.01638	0.39	-0.37362	0.771843	AT4G10790.1	UBX domain-containing protein
30213289	4	0.7904	0.04078	0.39	-0.34922	0.785008	AT4G11290.1	Peroxidase superfamily protein
30213308	2	0.737	-0.068	0.39	-0.458	0.727995	AT5G10860.1	Cystathionine beta-synthase (CBS) family protein
30213324	1	0.0115	0.38786	0.39	-0.00214	0.998518	AT1G19110.1	inter-alpha-trypsin inhibitor heavy chain-related
30213336	3	0.2205	-0.447	0.39	-0.837	0.559806	AT5G17820.1	Peroxidase superfamily protein
30213356	1	0.1142	0.3858	0.39	-0.0042	0.997093	AT5G09810.1	actin 7
30213359	2	0.0192	0.3892	0.39	-0.0008	0.999446	AT2G16270.1
30213433	45	<.0001	0.34386	0.39	-0.04614	0.968524	AT5G15650.1	reversibly glycosylated polypeptide 2
30213505	6	0.0119	0.3528	0.39	-0.0372	0.974545	AT3G01120.1	Pyridoxal phosphate (PLP)-dependent transferases superfamily protein
30213516	7	0.0282	0.505	0.39	0.115	1.08298	AT5G32450.1	RNA binding (RRM/RBD/RNP motifs) family protein
30213519	1	0.3878	0.2598	0.39	-0.1302	0.913705	AT5G13830.1	FtsJ-like methyltransferase family protein
30213532	1	0.0329	0.5847	0.39	0.1947	1.14449	AT5G06620.1	SET domain protein 38
30213540	1	0.2839	0.302	0.39	-0.088	0.940826	AT5G25260.1	SPFH/Band 7/PHB domain-containing membrane-associated protein family
30213556	2	0.0129	0.5908	0.39	0.2008	1.14934	AT3G25290.1	Auxin-responsive family protein
30213560	1	0.0891	0.5024	0.39	0.1124	1.08103	AT3G49660.1	Transducin/WD40 repeat-like superfamily protein
30213570	1	0.387	0.5408	0.39	0.1508	1.11018	AT2G32150.1	Haloacid dehalogenase-like hydrolase (HAD) superfamily protein
30213616	2	0.0107	0.5003	0.39	0.1103	1.07945	AT1G54690.1	gamma histone variant H2AX
30213617	4	0.0264	0.2522	0.39	-0.1378	0.908904	AT4G17720.1	RNA-binding (RRM/RBD/RNP motifs) family protein
30213622	4	0.0005	0.4896	0.39	0.0996	1.07148	AT5G62680.1	Major facilitator superfamily protein
30213633	2	0.392	-0.2821	0.39	-0.6721	0.627592	AT1G19530.1
30213641	1	0.041	0.5326	0.39	0.1426	1.10389	AT4G37850.1	basic helix-loop-helix (bHLH) DNA-binding superfamily protein
30213644	7	0.0072	0.26911	0.39	-0.12089	0.91962	AT1G07110.1	fructose-2,6-bisphosphatase
30213665	1	0.8818	-0.09248	0.39	-0.48248	0.715746	AT5G09900.1	26S proteasome regulatory subunit, putative (RPN5)
30213680	1	0.2399	0.423	0.39	0.033	1.02314	AT4G34890.1	xanthine dehydrogenase 1
30213695	2	0.1613	0.3306	0.39	-0.0594	0.959663	AT1G48480.1	receptor-like kinase 1
30213699	2	0.7954	0.03775	0.39	-0.35225	0.783361	AT1G71220.2	UDP-glucose:glycoprotein glucosyltransferases;transferases, transferring hexosyl groups;transferases, transferring glycosyl groups
30213703	1	0.1497	0.3874	0.39	-0.0026	0.998199	AT4G16440.1	ferredoxin hydrogenases
30213710	1	0.2139	0.4107	0.39	0.0207	1.01445	AT1G60995.1
30213713	1	0.1902	0.3818	0.39	-0.0082	0.994332	AT2G36360.3	Galactose oxidase/kelch repeat superfamily protein
30213734	1	0.2611	0.5981	0.39	0.2081	1.15517	AT3G49550.1
30213740	2	0.1219	0.5238	0.39	0.1338	1.09718	AT1G08780.1	ABI3-interacting protein 3
30213762	2	0.0377	0.3521	0.39	-0.0379	0.974072	AT5G43310.2	COP1-interacting protein-related
30213777	8	0.0005	0.4113	0.39	0.0213	1.01487	AT2G36800.1	don-glucosyltransferase 1
30213801	1	0.0061	0.7398	0.39	0.3498	1.27438	AT1G15200.1	protein-protein interaction regulator family protein
30213808	6	0.0203	-0.4255	0.39	-0.8155	0.568212	AT1G06950.1	translocon at the inner envelope membrane of chloroplasts 110
30213820	3	0.0009	0.6043	0.39	0.2143	1.16014	AT4G10730.1	Protein kinase superfamily protein
30213863	2	0.1292	0.6601	0.39	0.2701	1.20589	AT2G40290.1	Eukaryotic translation initiation factor 2 subunit 1
30213868	1	0.0398	0.9336	0.39	0.5436	1.45761	AT2G15890.1	maternal effect embryo arrest 14
30213873	11	<.0001	0.33444	0.39	-0.05556	0.962221	AT3G13460.1	evolutionarily conserved C-terminal region 2
30213881	3	0.1235	0.3343	0.39	-0.0557	0.962128	AT3G58470.1	nucleic acid binding;methyltransferases
30213895	1	0.0193	0.6023	0.39	0.2123	1.15853	AT5G39040.1	transporter associated with antigen processing protein 2
30213934	4	0.0077	0.3925	0.39	0.0025	1.00173	AT4G34460.1	GTP binding protein beta 1
30213955	14	0.0006	0.3869	0.39	-0.0031	0.997854	AT3G22630.1	20S proteasome beta subunit D1
30213976	2	0.7456	0.086	0.39	-0.304	0.810003	AT5G22020.1	Calcium-dependent phosphotriesterase superfamily protein
30213980	1	0.4092	0.4879	0.39	0.0979	1.07021	AT1G67350.1
30213987	1	0.3334	0.2462	0.39	-0.1438	0.905132	AT4G39260.3	cold, circadian rhythm, and RNA binding 1
30213989	1	0.2988	0.3825	0.39	-0.0075	0.994815	AT5G60660.1	plasma membrane intrinsic protein 2;4
30213995	2	0.3656	0.3279	0.39	-0.0621	0.957869	AT1G14830.1	DYNAMIN-like 1C
30214019	1	0.0125	0.6104	0.39	0.2204	1.16506	AT1G09160.1	Protein phosphatase 2C family protein
30214027	1	0.0213	0.4961	0.39	0.1061	1.07631	AT1G56000.1	FAD/NAD(P)-binding oxidoreductase family protein
30214053	8	0.0193	0.21439	0.39	-0.17561	0.885393	AT2G33150.1	peroxisomal 3-ketoacyl-CoA thiolase 3
30214058	3	0.0028	0.5341	0.39	0.1441	1.10504	AT4G30480.2	Tetratricopeptide repeat (TPR)-like superfamily protein
30214060	1	0.1562	0.4086	0.39	0.0186	1.01298	AT2G14835.2	RING/U-box superfamily protein
30214082	4	0.0052	0.3467	0.39	-0.0433	0.970433	AT4G01370.1	MAP kinase 4
30214087	9	0.0003	0.34821	0.39	-0.04179	0.971449	AT2G39050.1	hydroxyproline-rich glycoprotein family protein
30214088	20	0.0009	0.4451	0.39	0.0551	1.03893	AT2G39050.1	hydroxyproline-rich glycoprotein family protein
30214091	2	0.0052	0.4213	0.39	0.0313	1.02193	AT2G45620.1	Nucleotidyltransferase family protein
30214122	1	0.5067	0.2229	0.39	-0.1671	0.890631	AT5G47100.1	calcineurin B-like protein 9
30214132	1	0.1877	0.4195	0.39	0.0295	1.02066	AT5G28840.1	GDP-D-mannose 3\',5\'-epimerase
30214137	2	0.2846	0.2395	0.39	-0.1505	0.900938	AT5G08370.1	alpha-galactosidase 2
30214170	2	0.6894	0.05711	0.39	-0.33289	0.793944	AT1G58370.1	glycosyl hydrolase family 10 protein / carbohydrate-binding domain-containing protein
30214173	2	0.0218	0.3581	0.39	-0.0319	0.978131	AT5G42650.1	allene oxide synthase
30214178	1	0.092	0.325	0.39	-0.065	0.955945	AT5G42720.1	Glycosyl hydrolase family 17 protein
30214198	31	<.0001	-0.6956	0.39	-1.0856	0.471196	AT2G03440.1	nodulin-related protein 1
30214264	23	0.0003	0.33815	0.39	-0.05185	0.964698	AT3G46940.1	DUTP-PYROPHOSPHATASE-LIKE 1
30214267	4	0.2217	0.1399	0.39	-0.2501	0.840838	AT5G46180.1	ornithine-delta-aminotransferase
30214274	1	0.2421	0.4011	0.39	0.0111	1.00772	AT2G44870.1
30214285	7	0.0008	0.3018	0.39	-0.0882	0.940696	AT3G13460.1	evolutionarily conserved C-terminal region 2
30214305	1	0.2175	0.413	0.39	0.023	1.01607	AT3G19840.1	pre-mRNA-processing protein 40C
30214308	1	0.9524	-0.009611	0.39	-0.399611	0.758063	AT1G47550.1	exocyst complex component sec3A
30214335	1	0.1214	0.4172	0.39	0.0272	1.01903	AT5G66760.1	succinate dehydrogenase 1-1
30214341	8	<.0001	0.72239	0.39	0.33239	1.2591	AT1G56110.1	homolog of nucleolar protein NOP56
30214362	2	0.4526	0.2346	0.39	-0.1554	0.897883	AT2G14720.1	vacuolar sorting receptor 4
30214364	5	0.1098	0.2053	0.39	-0.1847	0.879832	AT4G19006.1	Proteasome component (PCI) domain protein
30214365	5	0.0766	0.2772	0.39	-0.1128	0.924791
30214378	2	0.0971	0.3427	0.39	-0.0473	0.967746	AT4G14570.1	acylaminoacyl-peptidase-related
30214379	3	0.0023	0.5551	0.39	0.1651	1.12124	AT2G16400.1	BEL1-like homeodomain 7
30214381	7	0.0045	0.4224	0.39	0.0324	1.02271	AT2G19940.2	oxidoreductases, acting on the aldehyde or oxo group of donors, NAD or NADP as acceptor;copper ion binding
30214385	6	<.0001	1.2277	0.39	0.8377	1.7872	AT1G76200.1
30214406	15	<.0001	0.53515	0.39	0.14515	1.10585	AT2G28760.3	UDP-XYL synthase 6
30214450	4	0.0923	0.2807	0.39	-0.1093	0.927038	AT2G31200.1	actin depolymerizing factor 6
30214452	1	0.0872	0.6451	0.39	0.2551	1.19342	AT4G34880.1	Amidase family protein
30214505	3	0.0792	0.3253	0.39	-0.0647	0.956144	AT3G19590.1	Transducin/WD40 repeat-like superfamily protein
30214525	1	0.4114	0.3458	0.39	-0.0442	0.969827	AT5G65860.2	ankyrin repeat family protein
30214528	1	0.2809	0.2905	0.39	-0.0995	0.933356	AT3G27690.1	photosystem II light harvesting complex gene 2.3
30214530	1	0.1169	0.5222	0.39	0.1322	1.09596	AT3G62310.1	RNA helicase family protein
30214537	1	0.0017	0.54199	0.39	0.15199	1.1111	AT5G15270.2	RNA-binding KH domain-containing protein
30214544	45	<.0001	0.35033	0.39	-0.03967	0.972877	AT5G43330.1	Lactate/malate dehydrogenase family protein
30214548	3	0.0007	0.5423	0.39	0.1523	1.11134	AT5G22040.3
30214552	6	0.6251	0.0575	0.39	-0.3325	0.794159	AT5G54190.1	protochlorophyllide oxidoreductase A
30214566	7	0.0005	0.28975	0.39	-0.10025	0.932871	AT1G05180.1	NAD(P)-binding Rossmann-fold superfamily protein
30214573	5	<.0001	0.5472	0.39	0.1572	1.11512	AT1G31910.1	GHMP kinase family protein
30214587	1	0.017	0.38366	0.39	-0.00634	0.995615	AT1G36160.1	acetyl-CoA carboxylase 1
30214607	3	0.0082	0.5017	0.39	0.1117	1.0805	AT1G07960.1	PDI-like 5-1
30214610	1	0.2212	0.4477	0.39	0.0577	1.04081	AT2G39630.1	Nucleotide-diphospho-sugar transferases superfamily protein
30214623	10	<.0001	0.43152	0.39	0.04152	1.0292	AT4G14960.2	Tubulin/FtsZ family protein
30214629	3	0.0137	0.5707	0.39	0.1807	1.13343	AT4G18440.1	L-Aspartase-like family protein
30214650	2	0.1263	0.3253	0.39	-0.0647	0.956144	AT4G02030.1	Vps51/Vps67 family (components of vesicular transport) protein
30214670	1	0.1896	0.3553	0.39	-0.0347	0.976235	AT3G22400.1	PLAT/LH2 domain-containing lipoxygenase family protein
30214710	2	0.3556	0.3259	0.39	-0.0641	0.956542	AT2G16060.1	hemoglobin 1
30214711	6	0.01	0.2877	0.39	-0.1023	0.931547	AT4G05390.1	root FNR 1
30214719	3	0.799	0.07544	0.39	-0.31456	0.804096	AT4G02280.1	sucrose synthase 3
30214725	4	0.0003	0.5914	0.39	0.2014	1.14981	AT5G67360.1	Subtilase family protein
30214746	5	0.0001	0.4843	0.39	0.0943	1.06755	AT5G46570.1	BR-signaling kinase 2
30214749	1	0.2068	0.2472	0.39	-0.1428	0.90576	AT3G60830.1	actin-related protein 7
30214752	2	0.914	0.03313	0.39	-0.35687	0.780857	AT5G61500.1	autophagy 3 (APG3)
30214755	3	0.5197	0.09488	0.39	-0.29512	0.815005	AT3G04770.2	40s ribosomal protein SA B
30214763	2	0.1234	0.3712	0.39	-0.0188	0.987053	AT4G34660.1	SH3 domain-containing protein
30214778	4	0.0004	0.5341	0.39	0.1441	1.10504	AT2G45790.1	phosphomannomutase
30214823	6	0.0401	0.3618	0.39	-0.0282	0.980643	AT1G27530.1
30214846	2	0.4597	-0.1808	0.39	-0.5708	0.673243
30214861	4	<.0001	0.7154	0.39	0.3254	1.25301	AT1G20330.1	sterol methyltransferase 2
30214866	1	0.429	0.3028	0.39	-0.0872	0.941348	AT1G79620.1	Leucine-rich repeat protein kinase family protein
30214868	4	0.0036	0.3695	0.39	-0.0205	0.985891	AT1G08130.1	DNA ligase 1
30214876	3	0.022	0.3355	0.39	-0.0545	0.962928	AT4G14960.2	Tubulin/FtsZ family protein
30214882	1	0.5649	0.2754	0.39	-0.1146	0.923638	AT1G04110.1	Subtilase family protein
30214895	1	0.0397	0.4466	0.39	0.0566	1.04001	AT5G42650.1	allene oxide synthase
30214900	5	<.0001	0.39803	0.39	0.00803	1.00558	AT5G65780.1	branched-chain amino acid aminotransferase 5 / branched-chain amino acid transaminase 5 (BCAT5)
30214932	1	0.5828	0.3798	0.39	-0.0102	0.992955	AT1G10130.1	endoplasmic reticulum-type calcium-transporting ATPase 3
30214946	1	0.9062	-0.03323	0.39	-0.42323	0.745753	AT4G26570.1	calcineurin B-like 3
30214975	6	0.0009	1.3733	0.39	0.9833	1.97698	AT1G17880.1	basic transcription factor 3
30214976	2	0.1552	0.2839	0.39	-0.1061	0.929096	AT4G39080.1	vacuolar proton ATPase A3
30214977	3	0.0251	0.2793	0.39	-0.1107	0.926139	AT1G70650.2	Ran BP2/NZF zinc finger-like superfamily protein
30214981	2	0.8694	0.04973	0.39	-0.34027	0.789893	AT2G03430.1	Ankyrin repeat family protein
30214982	3	0.0033	0.5299	0.39	0.1399	1.10183	AT4G13780.1	methionine--tRNA ligase, putative / methionyl-tRNA synthetase, putative / MetRS, putative
30214985	3	0.3217	0.1584	0.39	-0.2316	0.85169	AT3G54010.1	FKBP-type peptidyl-prolyl cis-trans isomerase family protein
30215000	3	0.1572	0.6251	0.39	0.2351	1.17699	AT4G40030.2	Histone superfamily protein
30215008	1	0.0629	0.4474	0.39	0.0574	1.04059	AT2G46520.1	cellular apoptosis susceptibility protein, putative / importin-alpha re-exporter, putative
30215019	23	0.0175	0.07963	0.39	-0.31037	0.806435	AT3G47340.1	glutamine-dependent asparagine synthase 1
30215024	1	0.3381	0.3073	0.39	-0.0827	0.944289	AT1G17455.1	ELF4-like 4
30215029	3	0.0013	0.7693	0.39	0.3793	1.30071	AT4G36195.3	Serine carboxypeptidase S28 family protein
30215060	2	0.0291	0.4415	0.39	0.0515	1.03634	AT3G22400.1	PLAT/LH2 domain-containing lipoxygenase family protein
30215081	1	0.6043	0.1642	0.39	-0.2258	0.855121	AT4G02715.1
30215087	26	0.0028	0.30269	0.39	-0.08731	0.941276	AT1G01090.1	pyruvate dehydrogenase E1 alpha
30215141	1	0.0808	0.3859	0.39	-0.0041	0.997162	AT1G57860.1	Translation protein SH3-like family protein
30215157	2	0.0191	0.4303	0.39	0.0403	1.02833	AT3G13990.2	Kinase-related protein of unknown function (DUF1296)
30215197	2	0.0143	0.5484	0.39	0.1584	1.11605	AT2G02040.1	peptide transporter 2
30215201	4	0.0054	0.3959	0.39	0.0059	1.0041	AT3G61690.1	nucleotidyltransferases
30215237	2	0.5536	0.07352	0.39	-0.31648	0.803027	AT1G64940.1	cytochrome P450, family 87, subfamily A, polypeptide 6
30215238	2	0.0006	0.9539	0.39	0.5639	1.47826	AT1G09750.1	Eukaryotic aspartyl protease family protein
30215239	20	0.0004	0.28328	0.39	-0.10672	0.928697	AT3G17390.1	S-adenosylmethionine synthetase family protein
30215251	1	0.7113	0.1247	0.39	-0.2653	0.832026	AT1G61620.1	phosphoinositide binding
30215283	2	0.0313	0.4585	0.39	0.0685	1.04863	AT2G42500.1	protein phosphatase 2A-3
30215299	12	<.0001	0.28449	0.39	-0.10551	0.929476	AT5G23860.1	tubulin beta 8
30215303	2	0.0665	0.2905	0.39	-0.0995	0.933356	AT5G12290.1	dgd1 suppressor 1
30215317	4	0.8907	0.03142	0.39	-0.35858	0.779932	AT1G55265.1	Protein of unknown function, DUF538
30215426	3	0.0029	0.4278	0.39	0.0378	1.02655	AT1G78900.1	vacuolar ATP synthase subunit A
30215457	1	0.0059	0.6985	0.39	0.3085	1.23842	AT3G05800.1	AtBS1(activation-tagged BRI1 suppressor 1)-interacting factor 1
30215472	3	0.0606	0.871	0.39	0.481	1.39571	AT1G09760.1	U2 small nuclear ribonucleoprotein A
30215482	10	<.0001	0.30785	0.39	-0.08215	0.944649	AT4G26000.1	RNA-binding KH domain-containing protein
30215538	1	0.0169	0.5233	0.39	0.1333	1.0968	AT2G01630.1	O-Glycosyl hydrolases family 17 protein
30215541	2	0.1889	0.2646	0.39	-0.1254	0.91675	AT1G64790.1	ILITYHIA
30215564	2	0.0007	0.5366	0.39	0.1466	1.10696	AT4G33910.1	2-oxoglutarate (2OG) and Fe(II)-dependent oxygenase superfamily protein
30215579	1	0.4945	0.2111	0.39	-0.1789	0.883376	AT5G03455.1	Rhodanese/Cell cycle control phosphatase superfamily protein
30215586	2	0.0818	0.3296	0.39	-0.0604	0.958998	AT3G19650.1	cyclin-related
30215591	1	0.3525	0.3852	0.39	-0.0048	0.996678	AT3G46060.2	RAB GTPase homolog 8A
30215601	1	0.1925	0.2559	0.39	-0.1341	0.911238	AT2G36950.1	Heavy metal transport/detoxification superfamily protein
30215618	4	0.0036	0.3335	0.39	-0.0565	0.961594	AT4G00660.1	RNAhelicase-like 8
30215630	9	0.2537	0.1892	0.39	-0.2008	0.870068	AT5G09570.1	Cox19-like CHCH family protein
30215648	5	0.0138	0.3345	0.39	-0.0555	0.962261	AT3G11830.1	TCP-1/cpn60 chaperonin family protein
30215678	1	0.0521	0.4189	0.39	0.0289	1.02023	AT1G55880.1	Pyridoxal-5\'-phosphate-dependent enzyme family protein
30215702	1	0.2223	0.4208	0.39	0.0308	1.02158	AT1G04430.1	S-adenosyl-L-methionine-dependent methyltransferases superfamily protein
30215710	7	<.0001	0.5072	0.39	0.1172	1.08463	AT4G12110.1	sterol-4alpha-methyl oxidase 1-1
30215723	1	0.4463	0.1689	0.39	-0.2211	0.857911	AT5G04890.1	HSP20-like chaperones superfamily protein
30215730	2	0.0217	0.4721	0.39	0.0821	1.05856	AT4G00090.1	Transducin/WD40 repeat-like superfamily protein
30215761	2	0.0036	0.5271	0.39	0.1371	1.09969	AT2G36850.1	glucan synthase-like 8
30215764	1	0.1055	0.3722	0.39	-0.0178	0.987738	AT5G62600.1	ARM repeat superfamily protein
30215822	11	0.0048	0.3056	0.39	-0.0844	0.943177	AT4G33250.1	eukaryotic translation initiation factor 3K
30215834	1	0.0795	0.3449	0.39	-0.0451	0.969223
30215843	1	0.1411	0.3567	0.39	-0.0333	0.977183	AT1G28590.1	GDSL-like Lipase/Acylhydrolase superfamily protein
30215852	2	0.0294	0.4142	0.39	0.0242	1.01692	AT2G20410.1	RNA-binding ASCH domain protein
30215864	3	0.0219	0.3447	0.39	-0.0453	0.969088	AT3G49680.1	branched-chain aminotransferase 3
30215874	26	0.0003	0.18647	0.39	-0.20353	0.868423	AT2G05710.1	aconitase 3
30215938	3	0.001	0.5238	0.39	0.1338	1.09718	AT1G35780.1
30215945	2	0.0293	0.5022	0.39	0.1122	1.08088	AT5G43490.1
30215979	1	0.1849	0.3216	0.39	-0.0684	0.953695	AT3G24200.2	FAD/NAD(P)-binding oxidoreductase family protein
30216005	4	0.7274	0.06777	0.39	-0.32223	0.799833	AT4G14110.1	COP9 signalosome, subunit CSN8
30216054	7	0.5415	0.09939	0.39	-0.29061	0.817556	AT4G18800.1	RAB GTPase homolog A1D
30216066	1	0.5738	0.2033	0.39	-0.1867	0.878613	AT3G01280.1	voltage dependent anion channel 1
30216112	1	0.2421	0.5103	0.39	0.1203	1.08696	AT1G31500.1	DNAse I-like superfamily protein
30216131	1	0.0825	0.6703	0.39	0.2803	1.21445	AT3G29770.1	methyl esterase 11
30216141	1	0.6053	-0.2201	0.39	-0.6101	0.655151	AT2G47350.1	HIT zinc finger ;PAPA-1-like conserved region
30216145	2	0.1266	0.3177	0.39	-0.0723	0.95112	AT2G38730.1	Cyclophilin-like peptidyl-prolyl cis-trans isomerase family protein
30216148	1	0.3919	0.2237	0.39	-0.1663	0.891125	AT3G06350.1	dehydroquinate dehydratase, putative / shikimate dehydrogenase, putative
30216151	2	0.0034	0.6188	0.39	0.2288	1.17186	AT1G36180.1	acetyl-CoA carboxylase 2
30216162	1	0.1175	0.4945	0.39	0.1045	1.07512	AT5G55530.2	Calcium-dependent lipid-binding (CaLB domain) family protein
30216165	7	<.0001	0.47651	0.39	0.08651	1.0618	AT1G61870.1	pentatricopeptide repeat 336
30216197	8	0.001	0.33331	0.39	-0.05669	0.961468	AT3G09630.1	Ribosomal protein L4/L1 family
30216201	6	0.0748	-0.1981	0.39	-0.5881	0.665218	AT5G06460.1	ubiquitin activating enzyme 2
30216220	4	0.0032	0.5933	0.39	0.2033	1.15133	AT1G73620.1	Pathogenesis-related thaumatin superfamily protein
30216223	4	<.0001	0.5681	0.39	0.1781	1.13139	AT5G53370.1	pectin methylesterase PCR fragment F
30216258	1	0.1481	1.0424	0.39	0.6524	1.57178	AT5G62440.1	Protein of unknown function (DUF3223)
30216309	1	0.1486	0.2735	0.39	-0.1165	0.922423	AT4G35160.1	O-methyltransferase family protein
30216329	11	0.1572	0.13724	0.39	-0.25276	0.839289	AT3G59920.1	RAB GDP dissociation inhibitor 2
30216335	1	0.2676	0.1692	0.39	-0.2208	0.858089	AT3G02910.1	AIG2-like (avirulence induced gene) family protein
30216348	10	<.0001	0.46611	0.39	0.07611	1.05417	AT1G04980.1	PDI-like 2-2
30216359	9	0.0172	0.22366	0.39	-0.16634	0.8911	AT5G10730.1	NAD(P)-binding Rossmann-fold superfamily protein
30216376	1	0.0913	0.3287	0.39	-0.0613	0.9584	AT2G24420.2	DNA repair ATPase-related
30216384	1	0.1161	0.4747	0.39	0.0847	1.06047	AT3G45010.1	serine carboxypeptidase-like 48
30216389	1	0.053	0.6467	0.39	0.2567	1.19474	AT5G26680.2	5\'-3\' exonuclease family protein
30216406	1	0.0384	0.843	0.39	0.453	1.36888	AT1G06020.1	pfkB-like carbohydrate kinase family protein
30216450	1	0.0694	0.4277	0.39	0.0377	1.02648	AT2G26040.1	PYR1-like 2
30216490	1	0.5744	0.1357	0.39	-0.2543	0.838394	AT2G45600.1	alpha/beta-Hydrolases superfamily protein
30216498	8	<.0001	0.35609	0.39	-0.03391	0.976769	AT3G12050.1	Aha1 domain-containing protein
30216529	2	0.0202	0.4833	0.39	0.0933	1.06681	AT2G48130.1	Bifunctional inhibitor/lipid-transfer protein/seed storage 2S albumin superfamily protein
30216541	4	0.0393	0.2781	0.39	-0.1119	0.925369	AT4G14950.1	SNARE associated Golgi protein family
30216580	1	0.1651	0.3486	0.39	-0.0414	0.971712	AT1G02410.1	cytochrome c oxidase assembly protein CtaG / Cox11 family
30216613	1	0.2563	0.2371	0.39	-0.1529	0.899441	AT5G07910.1	Leucine-rich repeat (LRR) family protein
30216685	7	0.0003	0.27994	0.39	-0.11006	0.92655	AT2G32910.1	DCD (Development and Cell Death) domain protein
30216686	5	0.0002	0.4507	0.39	0.0607	1.04297	AT3G55260.1	beta-hexosaminidase 1
30216892	2	0.6346	0.186	0.39	-0.204	0.86814	AT4G35160.1	O-methyltransferase family protein
30216941	1	0.28	0.3665	0.39	-0.0235	0.983843	AT4G31480.1	Coatomer, beta subunit
30216980	8	0.089	0.289	0.39	-0.101	0.932386	AT1G08450.1	calreticulin 3
30217104	1	0.3385	0.244	0.39	-0.146	0.903753	AT1G32100.1	pinoresinol reductase 1
30217123	2	0.3858	0.158	0.39	-0.232	0.851454	AT1G53280.1	Class I glutamine amidotransferase-like superfamily protein
30217135	20	<.0001	0.44706	0.39	0.05706	1.04034	AT1G27400.1	Ribosomal protein L22p/L17e family protein
30217165	1	0.013	0.6089	0.39	0.2189	1.16385	AT5G19280.1	kinase associated protein phosphatase
30217213	2	0.3755	0.1792	0.39	-0.2108	0.864058	AT4G13940.1	S-adenosyl-L-homocysteine hydrolase
30217222	2	0.001	0.5925	0.39	0.2025	1.15069	AT5G67090.1	Subtilisin-like serine endopeptidase family protein
30217289	4	0.0393	0.3437	0.39	-0.0463	0.968417	AT3G08910.1	DNAJ heat shock family protein
30217323	7	0.0062	0.28727	0.39	-0.10273	0.931269	AT1G07510.1	FTSH protease 10
30217391	1	0.2118	0.2797	0.39	-0.1103	0.926395	AT2G41870.1	Remorin family protein
30217437	1	0.4196	0.5876	0.39	0.1976	1.14679	AT5G37660.2	plasmodesmata-located protein 7
30217468	5	<.0001	0.5432	0.39	0.1532	1.11203	AT5G22010.1	replication factor C1
30217531	3	0.0845	0.2248	0.39	-0.1652	0.891805	AT3G13460.1	evolutionarily conserved C-terminal region 2
30217537	1	0.7082	0.1699	0.39	-0.2201	0.858506	AT3G21240.1	4-coumarate:CoA ligase 2
30217612	4	0.0013	0.4441	0.39	0.0541	1.03821	AT1G78060.1	Glycosyl hydrolase family protein
30217677	1	0.0176	0.407	0.39	0.017	1.01185	AT4G01690.1	Flavin containing amine oxidoreductase family
30217698	2	0.0359	0.5407	0.39	0.1507	1.11011	AT2G34470.2	urease accessory protein G
30217703	12	<.0001	0.40084	0.39	0.01084	1.00754	AT4G26310.1	elongation factor P (EF-P) family protein
30217709	2	0.0203	0.6361	0.39	0.2461	1.186	AT2G40730.1	Protein kinase family protein with ARM repeat domain
30217710	3	<.0001	0.6057	0.39	0.2157	1.16127	AT3G16810.1	pumilio 24
30217746	4	0.2254	0.4677	0.39	0.0777	1.05533	AT3G50360.1	centrin2
30217778	4	0.162	0.1796	0.39	-0.2104	0.864298	AT3G23600.1	alpha/beta-Hydrolases superfamily protein
30217812	1	0.0746	0.9498	0.39	0.5598	1.47406	AT2G47420.1	Ribosomal RNA adenine dimethylase family protein
30217813	3	0.0034	0.4047	0.39	0.0147	1.01024	AT3G10730.1	SAD1/UNC-84 domain protein 2
30217879	2	0.1466	0.5741	0.39	0.1841	1.13611	AT2G30970.1	aspartate aminotransferase 1
30217939	1	0.0404	0.983	0.39	0.593	1.50838	AT2G44120.2	Ribosomal protein L30/L7 family protein
30217988	1	0.2759	0.3662	0.39	-0.0238	0.983638	AT2G28100.1	alpha-L-fucosidase 1
30217989	3	<.0001	0.6042	0.39	0.2142	1.16006	AT5G62190.1	DEAD box RNA helicase (PRH75)
30218008	1	0.0916	0.5373	0.39	0.1473	1.10749	AT3G22320.1	Eukaryotic rpb5 RNA polymerase subunit family protein
30218024	3	0.0348	0.5309	0.39	0.1409	1.10259	AT5G10870.1	chorismate mutase 2
30218083	3	0.0127	0.4378	0.39	0.0478	1.03369	AT1G27680.1	ADPGLC-PPase large subunit
30218099	17	0.0001	0.4058	0.39	0.0158	1.01101	AT3G58730.1	vacuolar ATP synthase subunit D (VATD) / V-ATPase D subunit / vacuolar proton pump D subunit (VATPD)
30218119	1	0.0454	0.6735	0.39	0.2835	1.21714	AT4G31780.2	monogalactosyl diacylglycerol synthase 1
30218124	12	<.0001	0.42464	0.39	0.03464	1.0243	AT1G09640.1	Translation elongation factor EF1B, gamma chain
30218128	9	<.0001	0.35262	0.39	-0.03738	0.974423	AT2G44160.1	methylenetetrahydrofolate reductase 2
30218236	2	0.0537	0.3993	0.39	0.0093	1.00647	AT4G21090.2	MITOCHONDRIAL FERREDOXIN 2
30218390	7	0.0511	0.2095	0.39	-0.1805	0.882397	AT3G52200.2	Dihydrolipoamide acetyltransferase, long form protein
30218402	2	0.0258	0.5484	0.39	0.1584	1.11605	AT1G77940.1	Ribosomal protein L7Ae/L30e/S12e/Gadd45 family protein
30218405	1	0.3886	0.159	0.39	-0.231	0.852044	AT3G20000.1	translocase of the outer mitochondrial membrane 40
30218406	2	0.0377	0.4828	0.39	0.0928	1.06644	AT1G33980.1	Smg-4/UPF3 family protein
30218450	4	0.0007	0.4233	0.39	0.0333	1.02335	AT5G62270.2
30218457	2	0.1123	0.3837	0.39	-0.0063	0.995643	AT3G48050.2	BAH domain ;TFIIS helical bundle-like domain
30218481	7	0.0002	0.5129	0.39	0.1229	1.08892	AT2G05830.1	NagB/RpiA/CoA transferase-like superfamily protein
30218501	1	0.0385	0.27079	0.39	-0.11921	0.920692	AT2G26510.1	Xanthine/uracil permease family protein
30218544	3	0.0001	0.9677	0.39	0.5777	1.49247	AT4G15802.1	heat shock factor binding protein
30218560	3	0.0001	0.5683	0.39	0.1783	1.13155	AT5G21060.1	Glyceraldehyde-3-phosphate dehydrogenase-like family protein
30218567	1	0.0688	0.6333	0.39	0.2433	1.1837	AT2G30920.1	coenzyme Q 3
30218571	1	0.9593	0.01802	0.39	-0.37198	0.772721	AT2G44580.1	zinc ion binding
30218573	8	<.0001	0.9005	0.39	0.5105	1.42454	AT3G03340.1	LUC7 related protein
30218644	5	0.0013	0.446	0.39	0.056	1.03958	AT1G56080.1
30218661	1	0.2596	0.311	0.39	-0.079	0.946714	AT4G02930.1	GTP binding Elongation factor Tu family protein
30218783	5	0.0822	0.3507	0.39	-0.0393	0.973127	AT1G50510.1	indigoidine synthase A family protein
30218797	3	0.0112	0.5306	0.39	0.1406	1.10236	AT2G31170.1	Cysteinyl-tRNA synthetase, class Ia family protein
30218809	3	0.0027	0.5133	0.39	0.1233	1.08922	AT1G69690.1	TCP family transcription factor
30218811	2	0.9125	0.04758	0.39	-0.34242	0.788717	AT1G64520.1	regulatory particle non-ATPase 12A
30218862	2	0.8934	0.03809	0.39	-0.35191	0.783546	AT3G09800.1	SNARE-like superfamily protein
30218880	6	0.0004	0.4451	0.39	0.0551	1.03893	AT3G18080.1	B-S glucosidase 44
30218903	1	0.0381	0.6158	0.39	0.2258	1.16943	AT5G48580.1	FK506- and rapamycin-binding protein 15 kD-2
30218983	4	0.0057	0.3359	0.39	-0.0541	0.963195	AT5G62390.1	BCL-2-associated athanogene 7
30219009	36	0.1034	0.09773	0.39	-0.29227	0.816616	AT2G30620.1	winged-helix DNA-binding transcription factor family protein
30219010	3	<.0001	0.9072	0.39	0.5172	1.43117	AT5G09500.1	Ribosomal protein S19 family protein
30219019	7	0.0034	0.24966	0.39	-0.14034	0.907305	AT4G34030.1	3-methylcrotonyl-CoA carboxylase
30219029	29	<.0001	0.58851	0.39	0.19851	1.14751	AT2G39050.1	hydroxyproline-rich glycoprotein family protein
30219037	4	<.0001	0.6466	0.39	0.2566	1.19466	AT3G28860.1	ATP binding cassette subfamily B19
30219066	1	0.928	-0.04968	0.39	-0.43968	0.737298	AT1G70850.1	MLP-like protein 34
30219101	5	0.002	0.5494	0.39	0.1594	1.11682	AT2G38670.1	phosphorylethanolamine cytidylyltransferase 1
30219121	1	0.4779	0.2694	0.39	-0.1206	0.919805	AT5G55940.1	Uncharacterised protein family (UPF0172)
30219126	3	<.0001	0.619	0.39	0.229	1.17202	AT2G46300.1	Late embryogenesis abundant (LEA) hydroxyproline-rich glycoprotein family
30219167	1	0.2142	0.3206	0.39	-0.0694	0.953034	AT2G33700.1	Protein phosphatase 2C family protein
30219238	2	0.1877	0.4215	0.39	0.0315	1.02207	AT1G20270.1	2-oxoglutarate (2OG) and Fe(II)-dependent oxygenase superfamily protein
30219254	4	0.0037	0.31519	0.39	-0.07481	0.949467	AT3G25110.1	fatA acyl-ACP thioesterase
30219271	1	0.4433	0.108	0.39	-0.282	0.82245	AT2G44920.2	Tetratricopeptide repeat (TPR)-like superfamily protein
30219290	4	0.0015	0.4358	0.39	0.0458	1.03226	AT1G24764.1	microtubule-associated proteins 70-2
30219293	1	0.0028	0.7379	0.39	0.3479	1.27271	AT1G10270.1	glutamine-rich protein 23
30219305	5	0.0013	0.395	0.39	0.005	1.00347	AT3G11820.1	syntaxin of plants 121
30219343	4	<.0001	0.98752	0.39	0.59752	1.51311	AT3G05060.1	NOP56-like pre RNA processing ribonucleoprotein
30219363	5	0.0005	0.36245	0.39	-0.02755	0.981085	AT3G01280.1	voltage dependent anion channel 1
30219373	1	0.1563	0.5854	0.39	0.1954	1.14504	AT1G63780.1	Ribosomal RNA processing Brix domain protein
30219389	8	<.0001	0.48827	0.39	0.09827	1.07049	AT1G54630.1	acyl carrier protein 3
30219442	1	0.1466	0.4781	0.39	0.0881	1.06297	AT5G17540.1	HXXXD-type acyl-transferase family protein
30219462	20	<.0001	0.41272	0.39	0.02272	1.01587	AT3G25860.1	2-oxoacid dehydrogenases acyltransferase family protein
30219590	1	0.3165	0.3611	0.39	-0.0289	0.980167
30219720	4	0.6684	0.04991	0.39	-0.34009	0.789992	AT5G35630.3	glutamine synthetase 2
30219747	4	0.0002	0.531	0.39	0.141	1.10267	AT3G08030.1	Protein of unknown function, DUF642
30219748	1	0.2689	0.6263	0.39	0.2363	1.17797	AT3G57490.1	Ribosomal protein S5 family protein
30219767	9	0.0002	0.3741	0.39	-0.0159	0.989039	AT3G16480.1	mitochondrial processing peptidase alpha subunit
30219792	4	0.0052	0.4233	0.39	0.0333	1.02335	AT4G30160.2	villin 4
30219795	1	0.1479	0.5045	0.39	0.1145	1.0826	AT5G11150.1	vesicle-associated membrane protein 713
30219810	7	0.0029	0.4448	0.39	0.0548	1.03872	AT1G47420.1	succinate dehydrogenase 5
30219814	3	0.0003	0.6092	0.39	0.2192	1.16409	AT4G31180.2	Class II aminoacyl-tRNA and biotin synthetases superfamily protein
30219840	11	<.0001	0.36986	0.39	-0.02014	0.986137	AT3G15730.1	phospholipase D alpha 1
30219966	2	0.011	0.5489	0.39	0.1589	1.11644	AT4G17180.1	O-Glycosyl hydrolases family 17 protein
30219997	1	0.1381	0.522	0.39	0.132	1.09581	AT1G76940.1	RNA-binding (RRM/RBD/RNP motifs) family protein
30220066	1	0.0716	1.0257	0.39	0.6357	1.55369	AT1G65260.1	plastid transcriptionally active 4
30220069	1	0.7584	0.1808	0.39	-0.2092	0.865017	AT2G32060.1	Ribosomal protein L7Ae/L30e/S12e/Gadd45 family protein
30220099	3	0.1274	0.2454	0.39	-0.1446	0.90463	AT4G32605.1	Mitochondrial glycoprotein family protein
30220102	3	0.0694	0.3992	0.39	0.0092	1.0064	AT2G43680.1	IQ-domain 14
30220108	1	0.9429	0.02196	0.39	-0.36804	0.774834	AT2G41430.1	dehydration-induced protein (ERD15)
30220122	1	0.3344	0.4154	0.39	0.0254	1.01776	AT5G23670.2	long chain base2
30220131	8	<.0001	0.8451	0.39	0.4551	1.37088	AT5G58060.1	SNARE-like superfamily protein
30220133	1	0.0233	0.8714	0.39	0.4814	1.3961	AT1G43670.1	Inositol monophosphatase family protein
30220156	3	0.0031	0.5134	0.39	0.1234	1.0893	AT5G36110.1	cytochrome P450, family 716, subfamily A, polypeptide 1
30220192	1	0.1074	0.5398	0.39	0.1498	1.10942	AT1G69800.2	Cystathionine beta-synthase (CBS) protein
30220221	50	<.0001	0.41769	0.39	0.02769	1.01938	AT4G29130.1	hexokinase 1
30220238	1	0.1336	0.4236	0.39	0.0336	1.02356	AT1G18270.3	ketose-bisphosphate aldolase class-II family protein
30220248	2	0.6635	0.3748	0.39	-0.0152	0.989519	AT2G26920.1	Ubiquitin-associated/translation elongation factor EF1B protein
30220296	4	0.0729	0.3637	0.39	-0.0263	0.981935	AT3G15000.1	cobalt ion binding
30220368	19	<.0001	0.53597	0.39	0.14597	1.10647	AT5G57870.1	MIF4G domain-containing protein / MA3 domain-containing protein
30220429	1	0.0514	0.3745	0.39	-0.0155	0.989314	AT5G42820.2	Zinc finger C-x8-C-x5-C-x3-H type family protein
30220438	1	0.3091	0.3078	0.39	-0.0822	0.944616	AT5G48600.2	structural maintenance of chromosome 3
30220672	28	<.0001	0.30233	0.39	-0.08767	0.941041	AT5G13120.1	cyclophilin 20-2
30220682	11	<.0001	0.5832	0.39	0.1932	1.1433	AT2G37130.1	Peroxidase superfamily protein
30220715	4	0.589	-0.1181	0.39	-0.5081	0.703148	AT1G78300.1	general regulatory factor 2
30220747	3	0.0261	0.2721	0.39	-0.1179	0.921528	AT5G04940.1	SU(VAR)3-9 homolog 1
30220792	4	0.031	0.4259	0.39	0.0359	1.0252	AT3G12290.1	Amino acid dehydrogenase family protein
30220841	2	0.3184	0.335	0.39	-0.055	0.962594	AT5G61790.1	calnexin 1
30220846	6	0.0015	0.4563	0.39	0.0663	1.04703	AT2G35880.1	TPX2 (targeting protein for Xklp2) protein family
30220928	2	0.0019	0.7168	0.39	0.3268	1.25423	AT4G24040.1	trehalase 1
30220994	4	0.0075	0.4583	0.39	0.0683	1.04848	AT3G46970.1	alpha-glucan phosphorylase 2
30221005	3	0.5515	-0.1131	0.39	-0.5031	0.705589	AT5G12040.1	Nitrilase/cyanide hydratase and apolipoprotein N-acyltransferase family protein
30221015	5	0.0002	0.4863	0.39	0.0963	1.06903	AT1G49750.1	Leucine-rich repeat (LRR) family protein
30221078	2	0.1587	0.4468	0.39	0.0568	1.04016	AT4G02570.2	cullin 1
30221079	10	0.0096	0.3413	0.39	-0.0487	0.966807	AT3G25545.1
30221130	4	0.0572	0.2593	0.39	-0.1307	0.913388	AT4G29680.1	Alkaline-phosphatase-like family protein
30221151	6	0.2217	0.1463	0.39	-0.2437	0.844576	AT2G27600.1	AAA-type ATPase family protein
30221172	1	0.0817	1.0357	0.39	0.6457	1.5645	AT1G36730.1	Translation initiation factor IF2/IF5
30221243	2	0.0171	0.688	0.39	0.298	1.22944	AT3G11710.1	lysyl-tRNA synthetase 1
30221257	2	0.1737	0.2389	0.39	-0.1511	0.900564	AT3G46670.1	UDP-glucosyl transferase 76E11
30221277	3	0.6548	0.05092	0.39	-0.33908	0.790545	AT4G24520.1	P450 reductase 1
30221286	1	0.4048	0.1361	0.39	-0.2539	0.838626	AT4G17880.1	Basic helix-loop-helix (bHLH) DNA-binding family protein
30221301	1	0.005	0.7632	0.39	0.3732	1.29522	AT4G38540.1	FAD/NAD(P)-binding oxidoreductase family protein
30221355	2	0.0213	0.4746	0.39	0.0846	1.06039	AT3G11450.1	DnaJ domain ;Myb-like DNA-binding domain
30221372	1	0.1819	0.5701	0.39	0.1801	1.13296	AT5G07480.1	KAR-UP oxidoreductase 1
30221379	2	0.0734	0.3667	0.39	-0.0233	0.983979	AT3G10700.1	galacturonic acid kinase
30221385	4	0.0105	0.4228	0.39	0.0328	1.023	AT5G43060.1	Granulin repeat cysteine protease family protein
30221396	5	0.3195	0.1713	0.39	-0.2187	0.859339	AT5G13430.1	Ubiquinol-cytochrome C reductase iron-sulfur subunit
30221397	28	<.0001	0.25999	0.39	-0.13001	0.913825	AT3G19010.1	2-oxoglutarate (2OG) and Fe(II)-dependent oxygenase superfamily protein
30221402	3	0.5613	0.07842	0.39	-0.31158	0.805759	AT2G34660.2	multidrug resistance-associated protein 2
30221415	7	0.1096	0.1352	0.39	-0.2548	0.838103	AT4G08900.1	arginase
30221422	1	0.5021	-0.1437	0.39	-0.5337	0.690781	AT1G76690.1	12-oxophytodienoate reductase 2
30221426	1	0.6113	0.3481	0.39	-0.0419	0.971375	AT5G40370.1	Glutaredoxin family protein
30221452	2	0.256	-0.5104	0.39	-0.9004	0.535738	AT3G20050.1	T-complex protein 1 alpha subunit
30221454	8	0.0015	0.29091	0.39	-0.09909	0.933622	AT4G34110.1	poly(A) binding protein 2
30221470	1	0.4237	-0.1787	0.39	-0.5687	0.674224	AT1G29880.1	glycyl-tRNA synthetase / glycine--tRNA ligase
30221488	2	0.8514	0.06183	0.39	-0.32817	0.796546	AT4G00630.1	K+ efflux antiporter 2
30221520	2	0.7403	0.1898	0.39	-0.2002	0.87043	AT1G36050.2	Endoplasmic reticulum vesicle transporter protein
30221530	1	0.6028	0.1629	0.39	-0.2271	0.854351	AT1G32220.1	NAD(P)-binding Rossmann-fold superfamily protein
30221556	1	0.0633	0.5863	0.39	0.1963	1.14576	AT5G11420.1	Protein of unknown function, DUF642
30221574	5	0.0001	0.37089	0.39	-0.01911	0.986841	AT1G63500.1	Protein kinase protein with tetratricopeptide repeat domain
30221575	4	0.0295	0.2804	0.39	-0.1096	0.926845	AT1G14130.1	2-oxoglutarate (2OG) and Fe(II)-dependent oxygenase superfamily protein
30221602	2	0.1041	0.3272	0.39	-0.0628	0.957404	AT5G63910.1	farnesylcysteine lyase
30221620	7	<.0001	0.6873	0.39	0.2973	1.22884	AT3G16150.1	N-terminal nucleophile aminohydrolases (Ntn hydrolases) superfamily protein
30221647	8	0.0001	0.37526	0.39	-0.01474	0.989835	AT1G56070.1	Ribosomal protein S5/Elongation factor G/III/V family protein
30221661	4	<.0001	0.539	0.39	0.149	1.1088	AT4G31080.1	Protein of unknown function (DUF2296)
30221671	1	0.0238	0.5845	0.39	0.1945	1.14433	AT2G23420.1	nicotinate phosphoribosyltransferase 2
30221688	2	0.0354	0.3002	0.39	-0.0898	0.939653	AT1G53570.4	mitogen-activated protein kinase kinase kinase 3
30221691	1	0.2195	0.659	0.39	0.269	1.20497	AT5G57870.1	MIF4G domain-containing protein / MA3 domain-containing protein
30221692	2	0.8539	0.03987	0.39	-0.35013	0.784513	AT1G62660.1	Glycosyl hydrolases family 32 protein
30221703	6	0.1993	0.2388	0.39	-0.1512	0.900501	AT4G35260.1	isocitrate dehydrogenase 1
30221736	1	0.4477	0.196	0.39	-0.194	0.874179	AT5G18480.1	plant glycogenin-like starch initiation protein 6
30221760	2	0.0017	0.6002	0.39	0.2102	1.15685	AT1G03230.1	Eukaryotic aspartyl protease family protein
30221773	9	<.0001	0.4392	0.39	0.0492	1.03469	AT1G68290.1	endonuclease 2
30221826	2	0.0427	0.5017	0.39	0.1117	1.0805	AT4G39540.1	shikimate kinase 2
30221843	1	0.0495	0.566	0.39	0.176	1.12975	AT4G34215.2	Domain of unknown function (DUF303)
30221854	1	0.0477	1.6318	0.39	1.2418	2.36493	AT4G13200.1
30221859	2	0.0533	0.4068	0.39	0.0168	1.01171	AT1G31817.1	Ribosomal L18p/L5e family protein
30221868	2	0.433	0.6164	0.39	0.2264	1.16991	AT2G43670.1	Carbohydrate-binding X8 domain superfamily protein
30221903	2	0.0833	0.3869	0.39	-0.0031	0.997854	AT3G25660.1	Amidase family protein
30221915	2	0.3775	0.227	0.39	-0.163	0.893166	AT1G30630.1	Coatomer epsilon subunit
30221919	1	0.0915	0.4191	0.39	0.0291	1.02038	AT3G09970.1	Calcineurin-like metallo-phosphoesterase superfamily protein
30221920	1	0.5153	-0.569	0.39	-0.959	0.514413	AT3G02520.1	general regulatory factor 7
30221922	2	0.2864	0.2316	0.39	-0.1584	0.896018	AT1G05055.1	general transcription factor II H2
30221928	14	<.0001	1.0235	0.39	0.6335	1.55132	AT1G43245.1	SET domain-containing protein
30221932	4	0.0015	0.4545	0.39	0.0645	1.04572	AT4G10050.1	esterase/lipase/thioesterase family protein
30221953	1	0.0741	0.4212	0.39	0.0312	1.02186	AT4G04955.1	allantoinase
30221954	1	0.5723	0.3354	0.39	-0.0546	0.962861	AT1G18070.1	Translation elongation factor EF1A/initiation factor IF2gamma family protein
30221979	51	<.0001	0.41656	0.39	0.02656	1.01858	AT3G61110.1	ribosomal protein S27
30221993	1	0.1072	0.6071	0.39	0.2171	1.16239	AT2G37120.1	S1FA-like DNA-binding protein
30222003	1	0.4078	-0.3208	0.39	-0.7108	0.610981	AT5G45030.1	Trypsin family protein
30222026	3	0.5226	0.3601	0.39	-0.0299	0.979488	AT5G50320.1	radical SAM domain-containing protein / GCN5-related N-acetyltransferase (GNAT) family protein
30222044	2	0.1227	0.2821	0.39	-0.1079	0.927938	AT4G13010.1	Oxidoreductase, zinc-binding dehydrogenase family protein
30222074	1	0.0712	0.5587	0.39	0.1687	1.12405	AT3G28200.1	Peroxidase superfamily protein
30222106	4	0.0031	0.5528	0.39	0.1628	1.11946	AT5G08570.1	Pyruvate kinase family protein
30222110	1	0.4095	0.649	0.39	0.259	1.19665	AT2G45980.1
30222145	1	0.0353	0.9408	0.39	0.5508	1.4649	AT2G13610.1	ABC-2 type transporter family protein
30222146	1	0.3091	0.3415	0.39	-0.0485	0.966941	AT2G28100.1	alpha-L-fucosidase 1
30222166	1	0.1597	0.3963	0.39	0.0063	1.00438	AT1G05805.1	basic helix-loop-helix (bHLH) DNA-binding superfamily protein
30222214	1	0.6408	0.1499	0.39	-0.2401	0.846687	AT3G13570.1	SC35-like splicing factor 30A
30222231	5	0.0077	0.26942	0.39	-0.12058	0.919818	AT4G34660.1	SH3 domain-containing protein
30222267	13	0.0011	0.3594	0.39	-0.0306	0.979013	AT1G71695.1	Peroxidase superfamily protein
30222287	1	0.303	0.4568	0.39	0.0668	1.04739	AT1G62710.1	beta vacuolar processing enzyme
30222314	5	0.0092	0.27836	0.39	-0.11164	0.925535	AT1G24360.1	NAD(P)-binding Rossmann-fold superfamily protein
30222335	1	0.1071	0.9111	0.39	0.5211	1.43505	AT3G03420.1	Ku70-binding family protein
30222341	15	<.0001	0.41182	0.39	0.02182	1.01524	AT2G37190.1	Ribosomal protein L11 family protein
30222355	8	0.0037	0.5883	0.39	0.1983	1.14735	AT4G08390.2	stromal ascorbate peroxidase
30222365	4	0.2168	-0.2161	0.39	-0.6061	0.65697	AT2G27510.1	ferredoxin 3
30222366	6	0.0005	0.32367	0.39	-0.06633	0.955064	AT2G02070.1	indeterminate(ID)-domain 5
30222369	1	0.9342	-0.1084	0.39	-0.4984	0.707891	AT3G56860.3	UBP1-associated protein 2A
30222382	2	0.0184	0.8123	0.39	0.4223	1.34006	AT1G19880.1	Regulator of chromosome condensation (RCC1) family protein
30222401	2	0.0134	0.5667	0.39	0.1767	1.1303	AT3G27310.1	plant UBX domain-containing protein 1
30222408	2	0.0604	1.1055	0.39	0.7155	1.64205	AT5G05960.1	Bifunctional inhibitor/lipid-transfer protein/seed storage 2S albumin superfamily protein
30222409	3	0.0034	0.5602	0.39	0.1702	1.12521
30222568	2	0.0101	0.5612	0.39	0.1712	1.12599	AT3G07100.1	Sec23/Sec24 protein transport family protein
30222603	1	0.1036	0.5198	0.39	0.1298	1.09414	AT1G61820.1	beta glucosidase 46
30222615	3	0.0235	0.3891	0.39	-0.0009	0.999376	AT4G04210.1	plant UBX domain containing protein 4
30222616	1	0.3029	0.4267	0.39	0.0367	1.02576	AT1G45688.1
30222620	4	0.001	0.8959	0.39	0.5059	1.42001	AT4G20410.1	gamma-soluble NSF attachment protein
30222651	4	0.0478	0.2554	0.39	-0.1346	0.910922	AT1G31220.1	Formyl transferase
30222658	1	0.1636	0.5982	0.39	0.2082	1.15525	AT1G32050.1	SCAMP family protein
30222668	3	<.0001	0.7655	0.39	0.3755	1.29729	AT2G44120.2	Ribosomal protein L30/L7 family protein
30222670	61	<.0001	1.28779	0.39	0.89779	1.86321
30222675	1	0.7926	-0.09459	0.39	-0.48459	0.7147	AT4G24820.1	26S proteasome, regulatory subunit Rpn7;Proteasome component (PCI) domain
30222702	3	<.0001	0.41235	0.39	0.02235	1.01561	AT3G61860.1	RNA-binding (RRM/RBD/RNP motifs) family protein
30222731	3	0.0094	0.4329	0.39	0.0429	1.03018	AT5G48930.1	hydroxycinnamoyl-CoA shikimate/quinate hydroxycinnamoyl transferase
30222739	24	<.0001	0.44705	0.39	0.05705	1.04034	AT3G53260.1	phenylalanine ammonia-lyase 2
30222759	2	0.1093	0.4021	0.39	0.0121	1.00842	AT4G17170.1	RAB GTPase homolog B1C
30222788	1	0.1055	0.17981	0.39	-0.21019	0.864423	AT1G22360.1	UDP-glucosyl transferase 85A2
30222791	14	<.0001	0.3267	0.39	-0.0633	0.957072	AT2G43180.1	Phosphoenolpyruvate carboxylase family protein
30222793	9	0.0002	0.4256	0.39	0.0356	1.02498	AT5G16510.1	Alpha-1,4-glucan-protein synthase family protein
30222814	1	0.2719	0.317	0.39	-0.073	0.950659	AT2G27350.5	OTU-like cysteine protease family protein
30222818	2	0.0243	0.5294	0.39	0.1394	1.10145	AT1G04170.1	eukaryotic translation initiation factor 2 gamma subunit
30222820	3	0.0252	0.3428	0.39	-0.0472	0.967813	AT5G40760.1	glucose-6-phosphate dehydrogenase 6
30222832	1	0.6474	0.2612	0.39	-0.1288	0.914592	AT3G62160.1	HXXXD-type acyl-transferase family protein
30222836	10	0.0019	0.3726	0.39	-0.0174	0.988012	AT4G11790.1	Pleckstrin homology (PH) domain superfamily protein
30222886	29	0.2298	0.0769	0.39	-0.3131	0.80491	AT3G55280.1	ribosomal protein L23AB
30222887	1	0.0635	0.5651	0.39	0.1751	1.12904	AT2G45750.1	S-adenosyl-L-methionine-dependent methyltransferases superfamily protein
30222892	1	0.2261	0.3046	0.39	-0.0854	0.942523	AT5G18400.3	Cytokine-induced anti-apoptosis inhibitor 1, Fe-S biogenesis
30223020	15	<.0001	0.45802	0.39	0.06802	1.04828	AT1G11650.2	RNA-binding (RRM/RBD/RNP motifs) family protein
30223025	5	0.0034	0.5143	0.39	0.1243	1.08998	AT5G11710.1	ENTH/VHS family protein
30223033	9	0.0125	0.2809	0.39	-0.1091	0.927166	AT2G15490.1	UDP-glycosyltransferase 73B4
30223050	1	0.301	0.5373	0.39	0.1473	1.10749	AT5G41960.1
30223051	2	0.2418	0.2016	0.39	-0.1884	0.877578	AT4G39640.1	gamma-glutamyl transpeptidase 1
30223128	11	0.0082	0.3102	0.39	-0.0798	0.946189	AT1G80560.1	isopropylmalate dehydrogenase 2
30223129	1	0.4326	0.3206	0.39	-0.0694	0.953034	AT1G63270.1	non-intrinsic ABC protein 10
30223201	6	0.4216	0.1085	0.39	-0.2815	0.822735	AT5G43430.1	electron transfer flavoprotein beta
30223207	3	0.3088	0.3095	0.39	-0.0805	0.94573	AT5G24650.1	Mitochondrial import inner membrane translocase subunit Tim17/Tim22/Tim23 family protein
30223210	1	0.1199	0.5003	0.39	0.1103	1.07945	AT3G22370.1	alternative oxidase 1A
30223270	3	0.0006	0.82	0.39	0.43	1.34723	AT4G12400.2	stress-inducible protein, putative
30223284	6	0.0047	0.28079	0.39	-0.10921	0.927096	AT1G61720.1	NAD(P)-binding Rossmann-fold superfamily protein
30223294	1	0.0134	0.5789	0.39	0.1889	1.13989	AT1G62640.1	3-ketoacyl-acyl carrier protein synthase III
30223326	7	0.0002	0.7735	0.39	0.3835	1.3045	AT5G40570.1	Surfeit locus protein 2 (SURF2)
30223330	1	0.1186	0.349	0.39	-0.041	0.971981	AT1G03360.1	ribosomal RNA processing 4
30223345	1	0.3989	0.6128	0.39	0.2228	1.167	AT4G27780.1	acyl-CoA binding protein 2
30223363	2	0.01	0.6385	0.39	0.2485	1.18797	AT3G21865.1	peroxin 22
30223366	15	<.0001	0.37543	0.39	-0.01457	0.989952	AT4G08320.1	Tetratricopeptide repeat (TPR)-like superfamily protein
30223374	1	0.1456	0.4169	0.39	0.0269	1.01882	AT1G11190.1	bifunctional nuclease i
30223393	6	0.0096	0.3596	0.39	-0.0304	0.979149	AT5G20990.1	molybdopterin biosynthesis CNX1 protein / molybdenum cofactor biosynthesis enzyme CNX1 (CNX1)
30223398	4	0.0026	0.3587	0.39	-0.0313	0.978538	AT2G32910.1	DCD (Development and Cell Death) domain protein
30223401	1	0.822	0.07175	0.39	-0.31825	0.802042	AT5G07620.1	Protein kinase superfamily protein
30223422	1	0.0808	0.591	0.39	0.201	1.14949	AT1G76920.1	F-box family protein
30223434	3	0.1067	0.295	0.39	-0.095	0.936272	AT5G07440.2	glutamate dehydrogenase 2
30223457	1	0.1066	0.5523	0.39	0.1623	1.11907	AT5G58740.1	HSP20-like chaperones superfamily protein
30223473	11	0.0014	0.3442	0.39	-0.0458	0.968752	AT5G42510.1	Disease resistance-responsive (dirigent-like protein) family protein
30223474	2	0.0347	0.5107	0.39	0.1207	1.08726	AT2G37250.1	adenosine kinase
30223502	2	0.0006	0.47463	0.39	0.08463	1.06042	AT5G64500.1	Major facilitator superfamily protein
30223507	1	0.0259	0.595	0.39	0.205	1.15269	AT5G20600.1
30223511	3	0.0215	0.3562	0.39	-0.0338	0.976844	AT2G20860.1	lipoic acid synthase 1
30223549	1	0.1978	0.6166	0.39	0.2266	1.17007	AT3G06790.2	plastid developmental protein DAG, putative
30223561	4	<.0001	0.4271	0.39	0.0371	1.02605	AT4G33650.2	dynamin-related protein 3A
30223563	1	0.1521	0.3502	0.39	-0.0398	0.97279	AT2G35160.1	SU(VAR)3-9 homolog 5
30223591	17	0.6699	0.04357	0.39	-0.34643	0.786528	AT2G44050.1	6,7-dimethyl-8-ribityllumazine synthase / DMRL synthase / lumazine synthase / riboflavin synthase
30223594	1	0.838	0.09907	0.39	-0.29093	0.817375	AT1G19870.1	IQ-domain 32
30223602	1	0.06	0.4971	0.39	0.1071	1.07706	AT5G03500.2	Mediator complex, subunit Med7
30223610	1	0.1181	0.4222	0.39	0.0322	1.02257	AT3G25070.1	RPM1 interacting protein 4
30223613	1	0.0242	0.5676	0.39	0.1776	1.131	AT3G26400.1	eukaryotic translation initiation factor 4B1
30223630	2	0.2864	0.2966	0.39	-0.0934	0.937311	AT3G53430.1	Ribosomal protein L11 family protein
30223647	3	0.0471	0.1958	0.39	-0.1942	0.874057	AT5G39590.1	TLD-domain containing nucleolar protein
30223650	2	0.0306	0.412	0.39	0.022	1.01537	AT1G56130.1	Leucine-rich repeat transmembrane protein kinase
30223664	3	0.0137	0.3539	0.39	-0.0361	0.975288	AT5G66390.1	Peroxidase superfamily protein
30223677	1	0.1077	0.4876	0.39	0.0976	1.06999	AT2G31740.1	S-adenosyl-L-methionine-dependent methyltransferases superfamily protein
30223687	3	0.0109	0.3857	0.39	-0.0043	0.997024	AT1G67170.1
30223696	1	0.3027	0.1882	0.39	-0.2018	0.869465	AT3G10030.1	aspartate/glutamate/uridylate kinase family protein
30223710	6	<.0001	0.6221	0.39	0.2321	1.17454	AT2G43180.4	Phosphoenolpyruvate carboxylase family protein
30223720	1	0.117	0.5328	0.39	0.1428	1.10405	AT1G71980.1	Protease-associated (PA) RING/U-box zinc finger family protein
30223763	4	0.0004	0.5202	0.39	0.1302	1.09445	AT5G23300.1	pyrimidine d
30223809	3	0.0001	0.7011	0.39	0.3111	1.24065	AT3G03220.1	expansin A13
30223831	15	<.0001	0.33052	0.39	-0.05948	0.95961	AT2G43180.1	Phosphoenolpyruvate carboxylase family protein
30223836	2	0.6798	0.1751	0.39	-0.2149	0.861606	AT4G25280.1	P-loop containing nucleoside triphosphate hydrolases superfamily protein
30223837	3	0.001	0.5081	0.39	0.1181	1.0853	AT1G77510.1	PDI-like 1-2
30223852	1	0.0828	0.7089	0.39	0.3189	1.24738	AT1G16860.1	Ubiquitin-specific protease family C19-related protein
30223861	3	0.0159	0.4117	0.39	0.0217	1.01515	AT5G08170.1	porphyromonas-type peptidyl-arginine deiminase family protein
30223882	25	<.0001	0.4948	0.39	0.1048	1.07535	AT4G30190.1	H(+)-ATPase 2
30223909	8	<.0001	0.38777	0.39	-0.00223	0.998455	AT5G10560.1	Glycosyl hydrolase family protein
30223923	2	0.0905	0.298	0.39	-0.092	0.938221	AT4G31550.1	WRKY DNA-binding protein 11
30223927	1	0.2093	0.3719	0.39	-0.0181	0.987532	AT5G15140.1	Galactose mutarotase-like superfamily protein
30223933	1	0.4578	0.2119	0.39	-0.1781	0.883866	AT5G09380.1	RNA polymerase III RPC4
30223940	9	0.0118	0.2647	0.39	-0.1253	0.916813	AT5G10010.1
30223986	1	0.3796	-0.2589	0.39	-0.6489	0.637766	AT1G20696.3	high mobility group B3
30223987	1	0.0635	0.4207	0.39	0.0307	1.02151	AT3G12640.1	RNA binding (RRM/RBD/RNP motifs) family protein
30223989	7	0.0005	0.5518	0.39	0.1618	1.11868	AT3G11510.1	Ribosomal protein S11 family protein
30224019	2	0.1342	0.2907	0.39	-0.0993	0.933486	AT4G11640.1	serine racemase
30224062	1	0.0075	1.0522	0.39	0.6622	1.58249	AT2G25720.1
30224081	3	0.0452	0.3434	0.39	-0.0466	0.968215	AT5G08520.1	Duplicated homeodomain-like superfamily protein
30224099	8	0.0008	1.0354	0.39	0.6454	1.56417	AT4G25740.1	RNA binding Plectin/S10 domain-containing protein
30224139	5	0.4259	-0.1127	0.39	-0.5027	0.705785	AT3G48530.1	SNF1-related protein kinase regulatory subunit gamma 1
30224150	1	0.3107	0.3628	0.39	-0.0272	0.981323	AT5G16620.1	hydroxyproline-rich glycoprotein family protein
30224187	1	0.0347	0.479	0.39	0.089	1.06363	AT1G77540.1	Acyl-CoA N-acyltransferases (NAT) superfamily protein
30224213	1	0.0434	0.7014	0.39	0.3114	1.24091	AT5G14920.1	Gibberellin-regulated family protein
30224230	4	0.0028	0.7221	0.39	0.3321	1.25884	AT2G18980.1	Peroxidase superfamily protein
30224232	1	0.0032	0.854	0.39	0.464	1.37936	AT4G13730.1	Ypt/Rab-GAP domain of gyp1p superfamily protein
30224255	1	0.0272	0.8276	0.39	0.4376	1.35435	AT3G26020.2	Protein phosphatase 2A regulatory B subunit family protein
30224258	1	0.1616	0.4913	0.39	0.1013	1.07274	AT4G24990.1	Ubiquitin family protein
30224265	1	0.1804	0.3486	0.39	-0.0414	0.971712	AT3G49590.1	Autophagy-related protein 13
30224282	5	<.0001	0.7076	0.39	0.3176	1.24626	AT2G43640.2	Signal recognition particle, SRP9/SRP14 subunit
30224289	2	0.049	0.62	0.39	0.23	1.17283	AT3G22370.1	alternative oxidase 1A
30224294	1	0.0249	0.5909	0.39	0.2009	1.14942	AT4G30270.1	xyloglucan endotransglucosylase/hydrolase 24
30224297	3	0.3303	0.2128	0.39	-0.1772	0.884418	AT5G08540.1
30224310	5	0.0046	0.4521	0.39	0.0621	1.04398	AT1G03475.1	Coproporphyrinogen III oxidase
30224330	2	0.0189	0.3517	0.39	-0.0383	0.973802	AT5G63860.1	Regulator of chromosome condensation (RCC1) family protein
30224331	1	0.2247	0.3382	0.39	-0.0518	0.964732
30224359	2	0.0503	0.4466	0.39	0.0566	1.04001	AT3G52500.1	Eukaryotic aspartyl protease family protein
30224370	2	0.3971	0.1313	0.39	-0.2587	0.835841	AT1G36390.2	Co-chaperone GrpE family protein
30224371	1	0.0214	0.3804	0.39	-0.0096	0.993368	AT4G06744.1	Leucine-rich repeat (LRR) family protein
30224380	1	0.0281	0.3975	0.39	0.0075	1.00521	AT1G70180.2	Sterile alpha motif (SAM) domain-containing protein
30224387	2	0.0933	0.3777	0.39	-0.0123	0.991511	AT5G20190.1	Tetratricopeptide repeat (TPR)-like superfamily protein
30224391	2	0.1275	0.2769	0.39	-0.1131	0.924599	AT3G61260.1	Remorin family protein
30224405	2	0.5836	0.2123	0.39	-0.1777	0.884111	AT5G61790.1	calnexin 1
30224422	2	0.2123	0.2441	0.39	-0.1459	0.903815	AT5G55280.1	homolog of bacterial cytokinesis Z-ring protein FTSZ 1-1
30224465	1	0.0442	0.6728	0.39	0.2828	1.21655	AT2G45730.1	eukaryotic initiation factor 3 gamma subunit family protein
30224470	9	0.3909	-0.09482	0.39	-0.48482	0.714586	AT3G11330.1	plant intracellular ras group-related LRR 9
30224501	1	0.13	0.4484	0.39	0.0584	1.04131	AT1G18680.1	HNH endonuclease domain-containing protein
30224502	1	0.5877	-0.2749	0.39	-0.6649	0.630732	AT3G15130.1	Tetratricopeptide repeat (TPR)-like superfamily protein
30224537	3	0.0009	0.6018	0.39	0.2118	1.15813	AT5G60660.1	plasma membrane intrinsic protein 2;4
30224559	19	0.2814	0.07485	0.39	-0.31515	0.803767	AT1G47128.1	Granulin repeat cysteine protease family protein
30224605	4	0.0071	0.5007	0.39	0.1107	1.07975	AT5G60980.2	Nuclear transport factor 2 (NTF2) family protein with RNA binding (RRM-RBD-RNP motifs) domain
30224615	1	0.4499	0.2751	0.39	-0.1149	0.923446	AT3G45890.1	Protein of unknown function, DUF647
30224626	3	0.4712	0.2841	0.39	-0.1059	0.929225	AT3G29670.1	HXXXD-type acyl-transferase family protein
30224667	1	0.9507	-0.01306	0.39	-0.40306	0.756253	AT1G43690.1	ubiquitin interaction motif-containing protein
30224688	2	0.1774	0.2861	0.39	-0.1039	0.930514	AT3G10220.1	tubulin folding cofactor B
30224696	13	<.0001	0.44765	0.39	0.05765	1.04077	AT3G48990.1	AMP-dependent synthetase and ligase family protein
30224722	1	0.6748	0.168	0.39	-0.222	0.857376	AT1G47128.1	Granulin repeat cysteine protease family protein
30224747	1	0.3631	0.1419	0.39	-0.2481	0.842005	AT5G43960.1	Nuclear transport factor 2 (NTF2) family protein with RNA binding (RRM-RBD-RNP motifs) domain
30224749	3	0.0114	0.8581	0.39	0.4681	1.38329	AT2G20760.1	Clathrin light chain protein
30224758	1	0.6544	0.1513	0.39	-0.2387	0.847509	AT1G14570.1	UBX domain-containing protein
30224772	5	<.0001	0.657	0.39	0.267	1.2033	AT2G27285.1	Coiled-coil domain-containing protein 55 (DUF2040)
30224784	1	0.0969	0.6434	0.39	0.2534	1.19201	AT3G19690.1	CAP (Cysteine-rich secretory proteins, Antigen 5, and Pathogenesis-related 1 protein) superfamily protein
30224860	2	0.0692	0.3891	0.39	-0.0009	0.999376	AT5G52190.1	Sugar isomerase (SIS) family protein
30224868	1	0.0039	0.48794	0.39	0.09794	1.07024	AT3G14470.1	NB-ARC domain-containing disease resistance protein
30224904	11	0.0991	0.1912	0.39	-0.1988	0.871275	AT1G12840.1	vacuolar ATP synthase subunit C (VATC) / V-ATPase C subunit / vacuolar proton pump C subunit (DET3)
30224936	2	0.0007	0.5495	0.39	0.1595	1.1169	AT4G17720.1	RNA-binding (RRM/RBD/RNP motifs) family protein
30224942	1	0.1328	0.3466	0.39	-0.0434	0.970365	AT1G09010.1	glycoside hydrolase family 2 protein
30224950	3	0.0054	0.6054	0.39	0.2154	1.16103	AT5G05340.1	Peroxidase superfamily protein
30224978	1	0.4548	0.3159	0.39	-0.0741	0.949935	AT1G32730.1
30225033	1	0.2107	0.18	0.39	-0.21	0.864537	AT5G13630.1	magnesium-chelatase subunit chlH, chloroplast, putative / Mg-protoporphyrin IX chelatase, putative (CHLH)
30225046	8	0.0005	0.32037	0.39	-0.06963	0.952882	AT1G09700.1	dsRNA-binding domain-like superfamily protein
30225115	2	0.5084	0.445	0.39	0.055	1.03886	AT3G55520.1	FKBP-like peptidyl-prolyl cis-trans isomerase family protein
30225142	4	0.0072	0.4511	0.39	0.0611	1.04326	AT4G18070.3
30225162	5	0.112	0.2388	0.39	-0.1512	0.900501	AT3G11780.1	MD-2-related lipid recognition domain-containing protein / ML domain-containing protein
30225164	2	<.0001	1.1527	0.39	0.7627	1.69666	AT4G18260.1	Cytochrome b561/ferric reductase transmembrane protein family
30225237	6	0.003	0.3902	0.39	0.0002	1.00014	AT4G13930.1	serine hydroxymethyltransferase 4
30225242	1	0.0607	0.4427	0.39	0.0527	1.0372
30225275	1	0.2283	0.1995	0.39	-0.1905	0.876302	AT5G11420.1	Protein of unknown function, DUF642
30225375	5	0.0069	0.3359	0.39	-0.0541	0.963195	AT5G41330.1	BTB/POZ domain with WD40/YVTN repeat-like protein
30225503	3	0.0336	0.3378	0.39	-0.0522	0.964464	AT1G61790.1	Oligosaccharyltransferase complex/magnesium transporter family protein
30225512	2	0.2391	0.1578	0.39	-0.2322	0.851336	AT4G05160.1	AMP-dependent synthetase and ligase family protein
30225605	1	0.1459	0.5966	0.39	0.2066	1.15397	AT3G62360.1	Carbohydrate-binding-like fold
30225620	3	0.0288	0.3381	0.39	-0.0519	0.964665	AT4G35510.1
30225622	3	0.0258	0.288	0.39	-0.102	0.93174	AT1G21630.1	Calcium-binding EF hand family protein
30225665	1	0.6452	0.4247	0.39	0.0347	1.02434	AT1G08480.1
30225773	1	0.0584	0.4736	0.39	0.0836	1.05966	AT5G17330.1	glutamate decarboxylase
30225803	1	0.1654	0.683	0.39	0.293	1.22519	AT1G60710.1	NAD(P)-linked oxidoreductase superfamily protein
30225805	9	0.1862	0.13276	0.39	-0.25724	0.836687	AT1G60730.1	NAD(P)-linked oxidoreductase superfamily protein
30225809	3	0.0068	0.8541	0.39	0.4641	1.37946	AT2G20760.1	Clathrin light chain protein
30225849	1	0.2424	0.315	0.39	-0.075	0.949342
30225850	3	0.3515	0.3065	0.39	-0.0835	0.943765	AT5G63120.2	P-loop containing nucleoside triphosphate hydrolases superfamily protein
30225872	6	<.0001	0.3858	0.39	-0.0042	0.997093	AT2G44480.1	beta glucosidase 17
30225877	1	0.1599	0.5245	0.39	0.1345	1.09771	AT4G30160.1	villin 4
30225886	1	0.0209	0.4286	0.39	0.0386	1.02712	AT5G55550.3	RNA-binding (RRM/RBD/RNP motifs) family protein
30225887	1	0.2933	0.1474	0.39	-0.2426	0.845221	AT3G01160.1
30225893	2	0.1978	0.2304	0.39	-0.1596	0.895273	AT3G20550.1	SMAD/FHA domain-containing protein
30225895	1	0.2418	0.3554	0.39	-0.0346	0.976302	AT4G36870.2	BEL1-like homeodomain 2
30225911	1	0.0473	0.4917	0.39	0.1017	1.07304	AT3G07720.1	Galactose oxidase/kelch repeat superfamily protein
30225914	3	0.9276	0.03633	0.39	-0.35367	0.782591	AT5G66390.1	Peroxidase superfamily protein
30225929	1	0.0346	1.4109	0.39	1.0209	2.02918	AT3G62140.1
30225947	5	0.0013	0.28812	0.39	-0.10188	0.931818	AT1G03230.1	Eukaryotic aspartyl protease family protein
30225983	1	0.2692	0.3288	0.39	-0.0612	0.958467	AT5G10830.1	S-adenosyl-L-methionine-dependent methyltransferases superfamily protein
30225985	5	<.0001	0.5802	0.39	0.1902	1.14092	AT5G09760.1	Plant invertase/pectin methylesterase inhibitor superfamily
30225986	1	0.3402	-0.5001	0.39	-0.8901	0.539577	AT3G12380.2	actin-related protein 5
30226019	2	0.1339	0.3257	0.39	-0.0643	0.956409	AT3G04880.1	DNA-damage-repair/toleration protein (DRT102)
30226043	11	0.0008	0.4656	0.39	0.0756	1.0538	AT2G26080.1	glycine decarboxylase P-protein 2
30226049	18	<.0001	0.60839	0.39	0.21839	1.16343	AT5G24710.1	Transducin/WD40 repeat-like superfamily protein
30226070	1	0.5144	-0.2837	0.39	-0.6737	0.626897	AT3G48120.1
30226099	2	0.526	0.1902	0.39	-0.1998	0.870671	AT1G69370.1	chorismate mutase 3
30226100	4	0.1781	0.245	0.39	-0.145	0.904379	AT3G27890.1	NADPH:quinone oxidoreductase
30226117	1	0.291	1.557	0.39	1.167	2.24544	AT5G44360.1	FAD-binding Berberine family protein
30226118	1	0.238	0.5398	0.39	0.1498	1.10942	AT1G27480.1	alpha/beta-Hydrolases superfamily protein
30226196	6	0.4677	0.09892	0.39	-0.29108	0.81729	AT3G28715.1	ATPase, V0/A0 complex, subunit C/D
30226227	2	0.2014	0.2783	0.39	-0.1117	0.925497	AT2G39080.1	NAD(P)-binding Rossmann-fold superfamily protein
30226253	4	0.0002	0.6022	0.39	0.2122	1.15845	AT2G42580.1	tetratricopetide-repeat thioredoxin-like 3
30226279	1	0.2994	0.3468	0.39	-0.0432	0.9705	AT1G16430.1	Surfeit locus protein 5 subunit 22 of Mediator complex
30226281	1	0.7233	0.1238	0.39	-0.2662	0.831507	AT2G47810.1	nuclear factor Y, subunit B5
30226284	5	0.0507	0.2566	0.39	-0.1334	0.91168	AT1G66680.1	S-adenosyl-L-methionine-dependent methyltransferases superfamily protein
30226293	34	0.0007	0.21881	0.39	-0.17119	0.88811	AT5G03290.1	isocitrate dehydrogenase V
30226299	1	0.1668	0.5001	0.39	0.1101	1.0793	AT4G29480.1	Mitochondrial ATP synthase subunit G protein
30226325	1	0.8292	-0.03628	0.39	-0.42628	0.744178	AT1G35220.1
30226328	2	0.1671	0.2119	0.39	-0.1781	0.883866	AT5G53170.1	FTSH protease 11
[truncated: 4,312 more rows]

## Sheet: Total 400 E
Total identified proteins in 400 µM root maturation tissue sample
								Annotation (A. thaliana database)
Protein ID	No. peptides	Accession	t-test P-value	Treatment-log2 ratio	Log2 mean	Log2 -mean	Fold change	Accession	Description
30185070	7	Pavir.J35748.1	0.0008	-0.4806	-0.04	-0.4406	0.736828	AT2G03510.1	SPFH/Band 7/PHB domain-containing membrane-associated protein family
30185073	1	Pavir.J39206.1	0.2975	-0.4853	-0.04	-0.4453	0.734432	AT1G11650.2	RNA-binding (RRM/RBD/RNP motifs) family protein
30185111	1	Pavir.J25774.1	0.8114	-0.07502	-0.04	-0.03502	0.976018
30185142	12	Pavir.J00140.1	0.2202	0.10382	-0.04	0.14382	1.10483	AT5G14670.1	ADP-ribosylation factor A1B
30185151	8	Pavir.J00145.1	0.0538	-0.3002	-0.04	-0.2602	0.834972	AT5G17770.1	NADH:cytochrome B5 reductase 1
30185155	2	Pavir.J00143.1	0.3148	-0.3609	-0.04	-0.3209	0.80057	AT5G18900.1	2-oxoglutarate (2OG) and Fe(II)-dependent oxygenase superfamily protein
30185168	5	Pavir.J07454.1	0.7989	-0.0439	-0.04	-0.0039	0.9973	AT1G05620.1	uridine-ribohydrolase 2
30185180	1	Pavir.J05682.1	0.2318	0.2981	-0.04	0.3381	1.26409	AT5G61840.1	Exostosin family protein
30185183	2	Pavir.J05681.1	0.1604	-0.4796	-0.04	-0.4396	0.737339	AT5G13420.1	Aldolase-type TIM barrel family protein
30185204	1	Pavir.J16465.1	0.6195	-0.3576	-0.04	-0.3176	0.802404	AT5G39380.1	Plant calmodulin-binding protein-related
30185249	4	Pavir.J29109.1	0.0418	0.5198	-0.04	0.5598	1.47406	AT3G13470.1	TCP-1/cpn60 chaperonin family protein
30185261	1	Pavir.J04809.1	0.6105	0.1303	-0.04	0.1703	1.12529	AT1G74480.1	RWP-RK domain-containing protein
30185405	1	Pavir.J17443.1	0.6771	-0.4569	-0.04	-0.4169	0.749032	AT1G18970.1	germin-like protein 4
30185460	9	Pavir.Fa00397.1	0.1436	0.3012	-0.04	0.3412	1.26681	AT3G25230.1	rotamase FKBP 1
30185471	1	Pavir.Fa01285.1	0.3064	-0.2762	-0.04	-0.2362	0.848979	AT3G21215.1	RNA-binding (RRM/RBD/RNP motifs) family protein
30185480	1	Pavir.Fa00184.1	0.8025	0.1251	-0.04	0.1651	1.12124	AT4G33790.1	Jojoba acyl CoA reductase-related male sterility protein
30185525	9	Pavir.Fa00182.1	0.0898	0.2034	-0.04	0.2434	1.18378	AT2G36310.1	uridine-ribohydrolase 1
30185542	2	Pavir.Fa01867.1	0.0073	0.3814	-0.04	0.4214	1.33923	AT5G45550.1	Mob1/phocein family protein
30185552	3	Pavir.Fa00907.1	0.4318	-0.3796	-0.04	-0.3396	0.79026	AT5G35180.1	Protein of unknown function (DUF1336)
30185565	1	Pavir.Fa00989.1	0.2369	0.5297	-0.04	0.5697	1.48421	AT4G12730.1	FASCICLIN-like arabinogalactan 2
30185574	3	Pavir.Fa01372.1	0.085	0.4299	-0.04	0.4699	1.38501	AT1G63660.1	GMP synthase (glutamine-hydrolyzing), putative / glutamine amidotransferase, putative
30185591	3	Pavir.Fa01630.1	0.0144	-0.2888	-0.04	-0.2488	0.841596	AT1G23890.2	NHL domain-containing protein
30185592	1	Pavir.Fa00062.1	0.6357	-0.4575	-0.04	-0.4175	0.748721	AT5G32470.1	Haem oxygenase-like, multi-helical
30185603	2	Pavir.Fa01567.1	0.222	0.3626	-0.04	0.4026	1.32189																								1
30185607	8	Pavir.Fa01568.1	0.4313	0.1356	-0.04	0.1756	1.12943																								1
30185615	5	Pavir.Fa02199.1	0.0061	0.5412	-0.04	0.5812	1.49609	AT4G10260.1	pfkB-like carbohydrate kinase family protein
30185618	9	Pavir.Fa00852.1	0.388	0.1112	-0.04	0.1512	1.11049	AT1G55170.1
30185646	1	Pavir.Fa00410.1	0.1979	-0.6116	-0.04	-0.5716	0.67287	AT3G25290.1	Auxin-responsive family protein
30185650	7	Pavir.Fa00484.1	0.2534	-0.29	-0.04	-0.25	0.840896	AT1G17370.1	oligouridylate binding protein 1B
30185662	2	Pavir.Fa00406.1	0.7222	-0.05544	-0.04	-0.01544	0.989355	AT5G60190.1	Cysteine proteinases superfamily protein
30185674	3	Pavir.Fa02193.1	0.1645	-0.223	-0.04	-0.183	0.880869	AT3G63190.1	ribosome recycling factor, chloroplast precursor
30185712	2	Pavir.Fa02091.1	0.5935	0.08794	-0.04	0.12794	1.09273	AT1G64940.1	cytochrome P450, family 87, subfamily A, polypeptide 6
30185729	2	Pavir.Fa00616.1	0.2664	-0.2107	-0.04	-0.1707	0.888412	AT5G64260.1	EXORDIUM like 2
30185752	17	Pavir.Fa00867.1	0.0094	-0.34	-0.04	-0.3	0.812252	AT4G16450.2
30185761	3	Pavir.Fa00544.1	0.0557	0.7384	-0.04	0.7784	1.71523	AT5G56000.1	HEAT SHOCK PROTEIN 81.4
30185834	3	Pavir.Fa00681.1	0.7845	0.04117	-0.04	0.08117	1.05788	AT1G08080.1	alpha carbonic anhydrase 7
30185835	5	Pavir.Fa01915.1	0.5942	0.04902	-0.04	0.08902	1.06365	AT3G60600.1	vesicle associated protein
30185866	1	Pavir.Fa00150.1	0.1764	-0.3755	-0.04	-0.3355	0.792509	AT3G26935.1	DHHC-type zinc finger family protein
30185900	1	Pavir.Fa01131.1	0.2624	-0.2429	-0.04	-0.2029	0.868802	AT5G47780.1	galacturonosyltransferase 4
30185924	1	Pavir.Fa00632.1	0.6294	-0.07872	-0.04	-0.03872	0.973518	AT2G33620.1	AT hook motif DNA-binding family protein
30185943	2	Pavir.Fa00299.1	0.0476	0.2553	-0.04	0.2953	1.22714	AT2G24420.1	DNA repair ATPase-related
30185946	1	Pavir.Fa00225.1	0.1822	0.6762	-0.04	0.7162	1.64285	AT1G63120.1	RHOMBOID-like 2
30185952	1	Pavir.Fa00614.1	0.2332	-0.3985	-0.04	-0.3585	0.779975	AT5G64250.2	Aldolase-type TIM barrel family protein
30185990	4	Pavir.Fa00408.1	0.0003	-0.4408	-0.04	-0.4008	0.757438	AT4G18100.1	Ribosomal protein L32e
30186007	14	Pavir.Fa00827.1	0.7767	-0.03474	-0.04	0.00526	1.00365	AT1G17745.2	D-3-phosphoglycerate dehydrogenase
30186020	2	Pavir.Fa01457.1	0.1703	0.1906	-0.04	0.2306	1.17332	AT4G10960.1	UDP-D-glucose/UDP-D-galactose 4-epimerase 5
30186024	2	Pavir.Fa02158.1	0.7007	0.139	-0.04	0.179	1.1321	AT5G63620.1	GroES-like zinc-binding alcohol dehydrogenase family protein
30186072	2	Pavir.Fa01909.1	0.0919	0.2958	-0.04	0.3358	1.26208	AT1G79730.1	hydroxyproline-rich glycoprotein family protein
30186089	1	Pavir.Fa00635.1	0.198	0.7849	-0.04	0.8249	1.77141	AT3G11560.2	LETM1-like protein
30186092	1	Pavir.Fa00409.1	0.5444	0.1815	-0.04	0.2215	1.16595	AT3G07390.1	auxin-responsive family protein
30186103	1	Pavir.Fa00917.1	0.4353	-0.6121	-0.04	-0.5721	0.672637	AT5G48930.1	hydroxycinnamoyl-CoA shikimate/quinate hydroxycinnamoyl transferase
30186116	9	Pavir.Fa02071.1	0.4299	-0.05345	-0.04	-0.01345	0.99072	AT1G30580.1	GTP binding
30186119	1	Pavir.Fa01260.1	0.1551	-0.1778	-0.04	-0.1378	0.908904	AT1G79430.2	Homeodomain-like superfamily protein
30186143	6	Pavir.Fa01008.1	0.72	-0.06826	-0.04	-0.02826	0.980602	AT2G46750.1	D-arabinono-1,4-lactone oxidase family protein
30186150	2	Pavir.Fa00169.1	0.4229	0.2079	-0.04	0.2479	1.18748	AT2G36130.1	Cyclophilin-like peptidyl-prolyl cis-trans isomerase family protein
30186157	25	Pavir.Fa01874.1	0.0928	-0.15386	-0.04	-0.11386	0.924112	AT1G80490.2	TOPLESS-related 1
30186173	1	Pavir.Fa01460.1	0.1406	-1.2758	-0.04	-1.2358	0.424607	AT5G47530.1	Auxin-responsive family protein
30186221	1	Pavir.Fa02251.1	0.4908	-0.4635	-0.04	-0.4235	0.745614	AT1G32730.1
30186259	2	Pavir.Fa00175.1	0.636	0.05625	-0.04	0.09625	1.06899	AT3G54300.1	vesicle-associated membrane protein 727
30186302	2	Pavir.Fa00819.1	0.5739	0.2189	-0.04	0.2589	1.19657	AT1G73430.1	sec34-like family protein
30186331	2	Pavir.Fa01047.1	0.9632	-0.01046	-0.04	0.02954	1.02069	AT5G08120.1	movement protein binding protein 2C
30186336	27	Pavir.Fa01807.1	0.6698	-0.02787	-0.04	0.01213	1.00844	AT2G05710.1	aconitase 3
30186351	11	Pavir.Fa02092.1	0.5905	-0.07807	-0.04	-0.03807	0.973957	AT3G02100.1	UDP-Glycosyltransferase superfamily protein
30186362	1	Pavir.Fa01941.1	0.0913	1.1013	-0.04	1.1413	2.2058	AT1G06050.1	Protein of unknown function (DUF1336)
30186363	8	Pavir.Fa02123.1	0.5718	-0.04169	-0.04	-0.00169	0.998829	AT1G11840.6	glyoxalase I homolog
30186366	3	Pavir.Fa00618.1	0.2963	-0.318	-0.04	-0.278	0.824734	AT1G22410.1	Class-II DAHP synthetase family protein
30186378	24	Pavir.Fa00725.1	0.0265	-0.17767	-0.04	-0.13767	0.908986	AT1G02180.1	ferredoxin-related
30186379	2	Pavir.Fa01938.1	0.2841	-0.4678	-0.04	-0.4278	0.743395	AT5G28840.1	GDP-D-mannose 3\',5\'-epimerase
30186382	3	Pavir.Fa00552.1	0.257	-0.325	-0.04	-0.285	0.820742	AT5G56280.1	COP9 signalosome subunit 6A
30186387	1	Pavir.Fa00881.1	0.222	-0.2789	-0.04	-0.2389	0.847391	AT3G29010.1	Biotin/lipoate A/B protein ligase family
30186398	1	Pavir.Fa00051.1	0.0738	1.7627	-0.04	1.8027	3.48873	AT5G23950.1	Calcium-dependent lipid-binding (CaLB domain) family protein
30186406	2	Pavir.Fa00030.1	0.6577	0.08713	-0.04	0.12713	1.09212	AT2G36930.1	zinc finger (C2H2 type) family protein
30186418	1	Pavir.Fa00803.1	0.0996	-0.9768	-0.04	-0.9368	0.52239	AT1G56220.2	Dormancy/auxin associated family protein
30186437	4	Pavir.Fa00212.1	0.9287	-0.02761	-0.04	0.01239	1.00863	AT1G20200.1	PAM domain (PCI/PINT associated module) protein
30186446	13	Pavir.Fa00228.1	<.0001	0.4005	-0.04	0.4405	1.35707	AT5G52060.1	BCL-2-associated athanogene 1
30186456	1	Pavir.Fa00670.1	0.3082	0.6558	-0.04	0.6958	1.61978	AT4G14160.2	Sec23/Sec24 protein transport family protein
30186465	1	Pavir.Fa00721.1	0.9766	0.006037	-0.04	0.046037	1.03243	AT2G06050.3	oxophytodienoate-reductase 3
30186489	3	Pavir.Fa02218.1	0.1625	0.3985	-0.04	0.4385	1.35519	AT4G10610.1	CTC-interacting domain 12
30186498	2	Pavir.Fa01211.1	0.8931	-0.05414	-0.04	-0.01414	0.990247	AT5G57550.1	xyloglucan endotransglucosylase/hydrolase 25
30186509	2	Pavir.Fa01746.1	0.368	0.1318	-0.04	0.1718	1.12646	AT1G31070.2	N-acetylglucosamine-1-phosphate uridylyltransferase 1
30186518	1	Pavir.Fa00200.1	0.9795	0.007386	-0.04	0.047386	1.03339	AT3G13060.2	evolutionarily conserved C-terminal region 5
30186523	1	Pavir.Fa00605.1	0.8092	0.1171	-0.04	0.1571	1.11504	AT5G64200.1	ortholog of human splicing factor SC35
30186533	13	Pavir.Fa00915.1	0.1311	-0.1629	-0.04	-0.1229	0.91834	AT5G17330.1	glutamate decarboxylase
30186554	1	Pavir.Fa01758.1	0.0033	0.9511	-0.04	0.9911	1.9877	AT4G22310.1	Uncharacterised protein family (UPF0041)
30186556	1	Pavir.Fa00214.1	0.0943	0.7346	-0.04	0.7746	1.71072	AT4G38790.1	ER lumen protein retaining receptor family protein
30186566	2	Pavir.Fa01960.1	0.7928	-0.1133	-0.04	-0.0733	0.950461	AT4G17370.1	Oxidoreductase family protein
30186575	2	Pavir.Fa00199.1	0.7241	-0.1655	-0.04	-0.1255	0.916686	AT3G11750.1	Dihydroneopterin aldolase
30186590	13	Pavir.Fa00378.1	<.0001	-0.7511	-0.04	-0.7111	0.610854	AT1G67430.1	Ribosomal protein L22p/L17e family protein
30186601	5	Pavir.Fa00702.1	0.3646	-0.1442	-0.04	-0.1042	0.930321	AT3G12050.1	Aha1 domain-containing protein
30186607	2	Pavir.Fa00055.1	0.0451	-0.7222	-0.04	-0.6822	0.623214	AT2G36910.1	ATP binding cassette subfamily B1
30186617	1	Pavir.Fa00376.1	0.7122	0.2145	-0.04	0.2545	1.19292	AT1G27920.1	microtubule-associated protein 65-8
30186647	6	Pavir.Fa02322.1	0.0309	-0.7909	-0.04	-0.7509	0.594233
30186665	58	Pavir.Fa02356.1	<.0001	0.51925	-0.04	0.55925	1.4735	AT1G12310.1	Calcium-binding EF-hand family protein
30186676	1	Pavir.Fa00380.1	0.0714	0.23015	-0.04	0.27015	1.20593	AT3G27190.1	uridine kinase-like 2
30186692	1	Pavir.Fa00874.1	0.4485	-0.2161	-0.04	-0.1761	0.885092	AT1G68650.1	Uncharacterized protein family (UPF0016)
30186714	2	Pavir.Fa00154.1	0.5213	0.2217	-0.04	0.2617	1.19889	AT5G14790.1	ARM repeat superfamily protein
30186734	10	Pavir.Fa01896.1	0.1629	0.2075	-0.04	0.2475	1.18715	AT4G27585.1	SPFH/Band 7/PHB domain-containing membrane-associated protein family
30186739	11	Pavir.Fa01925.1	0.0338	0.3506	-0.04	0.3906	1.31094	AT1G12110.1	nitrate transporter 1.1
30186746	8	Pavir.Fa01762.1	0.3941	-0.1445	-0.04	-0.1045	0.930127	AT3G13060.2	evolutionarily conserved C-terminal region 5
30186758	6	Pavir.Fa00230.1	0.035	0.4299	-0.04	0.4699	1.38501	AT5G53620.2
30186773	3	Pavir.Fa00060.1	0.0277	-0.6466	-0.04	-0.6066	0.656743	AT4G28730.1	Glutaredoxin family protein
30186795	27	Pavir.Fa00648.1	<.0001	0.57402	-0.04	0.61402	1.53052	AT3G52300.1	ATP synthase D chain, mitochondrial
30186826	3	Pavir.Fa01087.1	0.105	-0.3254	-0.04	-0.2854	0.820514	AT2G25110.1	stromal cell-derived factor 2-like protein precursor
30186861	7	Pavir.Fa01113.1	0.784	-0.05111	-0.04	-0.01111	0.992329	AT1G06560.1	NOL1/NOP2/sun family protein
30186866	1	Pavir.Fa00962.1	0.3146	-0.4216	-0.04	-0.3816	0.767586	AT4G22320.1
30186867	2	Pavir.Fa00293.1	0.2493	-0.6918	-0.04	-0.6518	0.636486	AT4G35320.1
30186872	5	Pavir.Fa01933.1	0.1299	0.4177	-0.04	0.4577	1.37335	AT1G12230.1	Aldolase superfamily protein
30186898	2	Pavir.Fa01472.1	0.5117	0.3887	-0.04	0.4287	1.34602	AT2G42680.1	multiprotein bridging factor 1A
30186910	5	Pavir.Fa00576.1	0.5414	0.1128	-0.04	0.1528	1.11173	AT1G55740.1	seed imbibition 1
30186940	2	Pavir.Fa01559.1	0.3941	-0.3869	-0.04	-0.3469	0.786272	AT1G60200.1	splicing factor PWI domain-containing protein / RNA recognition motif (RRM)-containing protein
30186959	2	Pavir.Fa00694.1	0.6585	-0.1005	-0.04	-0.0605	0.958932	AT3G18190.1	TCP-1/cpn60 chaperonin family protein
30186966	1	Pavir.Fa00778.1	0.0091	-1.8392	-0.04	-1.7992	0.287334	AT4G14305.1	Peroxisomal membrane 22 kDa (Mpv17/PMP22) family protein
30186971	8	Pavir.Fa00070.1	0.1687	-0.2186	-0.04	-0.1786	0.88356	AT3G54670.3	Structural maintenance of chromosomes (SMC) family protein
30186975	7	Pavir.Fa00854.1	0.0023	0.8808	-0.04	0.9208	1.89316	AT3G02520.1	general regulatory factor 7
30186990	14	Pavir.Fa00195.1	0.8949	-0.02103	-0.04	0.01897	1.01324	AT5G50260.1	Cysteine proteinases superfamily protein
30187020	1	Pavir.Fa00987.1	0.4459	0.5602	-0.04	0.6002	1.51593	AT3G46780.1	plastid transcriptionally active 16
30187053	1	Pavir.Fa00972.1	0.3112	-0.2776	-0.04	-0.2376	0.848155	AT4G33720.1	CAP (Cysteine-rich secretory proteins, Antigen 5, and Pathogenesis-related 1 protein) superfamily protein
30187088	8	Pavir.Fa00119.1	0.0667	0.2347	-0.04	0.2747	1.20974	AT1G08360.1	Ribosomal protein L1p/L10e family
30187128	1	Pavir.Fa01747.1	0.2957	-0.411	-0.04	-0.371	0.773246	AT1G05310.1	Pectin lyase-like superfamily protein
30187167	1	Pavir.Fa00975.1	0.3376	0.8014	-0.04	0.8414	1.79179	AT3G10090.1	Nucleic acid-binding, OB-fold-like protein
30187176	21	Pavir.Fa01907.1	0.8455	0.01633	-0.04	0.05633	1.03982	AT5G54160.1	O-methyltransferase 1
30187183	1	Pavir.Fa01166.1	0.9641	0.01788	-0.04	0.05788	1.04094	AT1G19080.1	GINS complex protein
30187213	1	Pavir.Fa00240.1	0.3593	0.10136	-0.04	0.14136	1.10294	AT5G10460.1	Haloacid dehalogenase-like hydrolase (HAD) superfamily protein
30187238	1	Pavir.Fa00501.1	0.7028	-0.2922	-0.04	-0.2522	0.839615	AT4G28706.3	pfkB-like carbohydrate kinase family protein
30187283	3	Pavir.Fa00382.1	0.2429	0.3589	-0.04	0.3989	1.3185	AT3G60820.1	N-terminal nucleophile aminohydrolases (Ntn hydrolases) superfamily protein
30187294	1	Pavir.Fa02289.1	0.906	-0.02825	-0.04	0.01175	1.00818	AT5G54580.1	RNA-binding (RRM/RBD/RNP motifs) family protein
30187312	2	Pavir.Fa00458.1	0.2197	-0.2744	-0.04	-0.2344	0.850038	AT5G06740.1	Concanavalin A-like lectin protein kinase family protein
30187329	2	Pavir.Fa00017.1	0.9931	0.00259	-0.04	0.04259	1.02996	AT2G27930.1	PLATZ transcription factor family protein
30187335	6	Pavir.Fa01957.1	0.0167	-0.2813	-0.04	-0.2413	0.845983	AT2G22360.1	DNAJ heat shock family protein
30187346	9	Pavir.Fa00035.1	0.6997	0.05402	-0.04	0.09402	1.06734	AT5G25100.1	Endomembrane protein 70 protein family
30187351	16	Pavir.Fa00889.1	0.008	-0.26614	-0.04	-0.22614	0.854919	AT3G47520.1	malate dehydrogenase
30187381	1	Pavir.Fa01138.1	0.0478	-0.519	-0.04	-0.479	0.717475	AT1G54500.1	Rubredoxin-like superfamily protein
30187385	9	Pavir.Fa01769.1	0.1836	0.2129	-0.04	0.2529	1.1916	AT2G22230.1	Thioesterase superfamily protein
30187394	1	Pavir.Fa00824.1	0.9139	0.03718	-0.04	0.07718	1.05495	AT4G20720.1	dentin sialophosphoprotein-related
30187401	1	Pavir.Fa00649.1	0.8939	0.03212	-0.04	0.07212	1.05126	AT4G38090.1	Ribosomal protein S5 domain 2-like superfamily protein
30187404	2	Pavir.Fa00830.1	0.191	0.4176	-0.04	0.4576	1.37326	AT2G24270.4	aldehyde dehydrogenase 11A3
30187412	1	Pavir.Fa01144.1	0.4264	0.5986	-0.04	0.6386	1.55682	AT2G26110.1	Protein of unknown function (DUF761)
30187427	1	Pavir.Fa02018.1	0.9542	0.03168	-0.04	0.07168	1.05094	AT3G20650.1	mRNA capping enzyme family protein
30187457	10	Pavir.Fa00090.1	0.2641	-0.1393	-0.04	-0.0993	0.933486	AT4G38900.2	Basic-leucine zipper (bZIP) transcription factor family protein
30187488	5	Pavir.Fa01696.1	0.0099	0.453	-0.04	0.493	1.40737	AT4G39330.1	cinnamyl alcohol dehydrogenase 9
30187499	3	Pavir.Fa00853.1	0.8304	-0.06589	-0.04	-0.02589	0.982214	AT3G02540.3	Rad23 UV excision repair protein family
30187514	1	Pavir.Fa02166.1	0.2402	0.1935	-0.04	0.2335	1.17568	AT4G09900.1	methyl esterase 12
30187533	1	Pavir.Fa01864.1	0.5656	-0.1669	-0.04	-0.1269	0.915797	AT5G43130.1	TBP-associated factor 4
30187537	9	Pavir.Fa02041.1	0.0212	-0.21523	-0.04	-0.17523	0.885626	AT1G11650.2	RNA-binding (RRM/RBD/RNP motifs) family protein
30187547	1	Pavir.Fa00489.1	0.561	0.2516	-0.04	0.2916	1.224	AT3G20250.1	pumilio 5
30187551	6	Pavir.Fa00100.1	0.5079	0.09807	-0.04	0.13807	1.10043	AT3G59350.1	Protein kinase superfamily protein
30187552	2	Pavir.Fa00666.1	0.07	0.5851	-0.04	0.6251	1.54232	AT1G47480.1	alpha/beta-Hydrolases superfamily protein
30187553	2	Pavir.Fa02358.1	0.585	0.2296	-0.04	0.2696	1.20547	AT3G23810.1	S-adenosyl-l-homocysteine (SAH) hydrolase 2
30187556	12	Pavir.Fa02213.1	0.1095	-0.2118	-0.04	-0.1718	0.887734	AT2G46750.1	D-arabinono-1,4-lactone oxidase family protein
30187559	5	Pavir.Fa01512.1	0.4094	-0.1752	-0.04	-0.1352	0.910544	AT5G23090.4	nuclear factor Y, subunit B13
30187564	4	Pavir.Fa01398.1	0.1291	0.2407	-0.04	0.2807	1.21478	AT5G48300.1	ADP glucose pyrophosphorylase 1
30187567	1	Pavir.Fa01556.1	0.6387	-0.1702	-0.04	-0.1302	0.913705	AT2G46740.1	D-arabinono-1,4-lactone oxidase family protein
30187576	1	Pavir.Fa01397.1	0.891	0.02138	-0.04	0.06138	1.04346	AT1G76550.1	Phosphofructokinase family protein
30187580	2	Pavir.Fa00445.1	0.2721	-0.2562	-0.04	-0.2162	0.86083	AT4G38220.1	Peptidase M20/M25/M40 family protein
30187607	4	Pavir.Fa01419.1	0.4214	0.1761	-0.04	0.2161	1.16159	AT1G79720.1	Eukaryotic aspartyl protease family protein
30187623	13	Pavir.Fa02355.1	0.01	-0.3178	-0.04	-0.2778	0.824848	AT4G00100.1	ribosomal protein S13A
30187636	1	Pavir.Fa00624.1	0.8798	-0.05151	-0.04	-0.01151	0.992054	AT4G40020.1	Myosin heavy chain-related protein
30187642	17	Pavir.Fa00171.1	0.6297	0.06078	-0.04	0.10078	1.07235	AT4G39200.1	Ribosomal protein S25 family protein
30187646	1	Pavir.Fa01002.1	0.6665	0.1074	-0.04	0.1474	1.10757	AT5G57460.1
30187651	2	Pavir.Fa00548.1	0.0195	0.8863	-0.04	0.9263	1.9004	AT2G44200.1	CBF1-interacting co-repressor CIR, N-terminal;Pre-mRNA splicing factor
30187653	1	Pavir.Fa00890.1	0.0073	2.1771	-0.04	2.2171	4.64958	AT2G02990.1	ribonuclease 1
30187669	4	Pavir.Fa01934.1	0.9201	0.02988	-0.04	0.06988	1.04963	AT3G61420.1	BSD domain (BTF2-like transcription factors, Synapse-associated proteins and DOS2-like proteins)
30187686	2	Pavir.Fa01571.1	0.0044	-0.27332	-0.04	-0.23332	0.850675	AT5G05670.2	signal recognition particle binding
30187689	6	Pavir.Fa02320.1	0.2075	-0.217	-0.04	-0.177	0.88454	AT3G04120.1	glyceraldehyde-3-phosphate dehydrogenase C subunit 1
30187732	1	Pavir.Fa01174.1	0.0488	-0.2916	-0.04	-0.2516	0.839964	AT4G10490.1	2-oxoglutarate (2OG) and Fe(II)-dependent oxygenase superfamily protein
30187749	1	Pavir.Fa00657.1	0.3166	-0.3301	-0.04	-0.2901	0.817845	AT2G26560.1	phospholipase A 2A
30187752	4	Pavir.Fa00742.1	0.9158	0.02909	-0.04	0.06909	1.04905	AT3G45070.1	P-loop containing nucleoside triphosphate hydrolases superfamily protein
30187756	1	Pavir.Fa01161.1	0.6447	0.4978	-0.04	0.5378	1.45176	AT2G23990.1	early nodulin-like protein 11
30187765	1	Pavir.Fa00891.1	0.1814	0.3256	-0.04	0.3656	1.28842	AT5G04600.1	RNA-binding (RRM/RBD/RNP motifs) family protein
30187771	2	Pavir.Fa00937.1	0.1176	0.2763	-0.04	0.3163	1.24513	AT1G15950.1	cinnamoyl coa reductase 1
30187796	2	Pavir.Fa00739.1	0.6966	-0.1604	-0.04	-0.1204	0.919933	AT1G19130.1
30187801	2	Pavir.Fa00161.1	0.62	-0.2419	-0.04	-0.2019	0.869405	AT4G37530.1	Peroxidase superfamily protein
30187803	4	Pavir.Fa02007.1	0.0003	-1.0428	-0.04	-1.0028	0.499031	AT5G54060.1	UDP-glucose:flavonoid 3-o-glucosyltransferase
30187831	2	Pavir.Fa00963.1	0.7433	0.2059	-0.04	0.2459	1.18583	AT4G26780.1	Co-chaperone GrpE family protein
30187839	3	Pavir.Fa00416.1	0.3428	0.4244	-0.04	0.4644	1.37974	AT2G27100.1	C2H2 zinc-finger protein SERRATE (SE)
30187844	20	Pavir.Fa01395.1	0.0131	0.2009	-0.04	0.2409	1.18173	AT3G21240.1	4-coumarate:CoA ligase 2
30187854	3	Pavir.Fa02364.1	0.3708	-0.2537	-0.04	-0.2137	0.862323	AT5G50920.1	CLPC homologue 1
30187869	2	Pavir.Fa02179.1	0.1688	-0.2806	-0.04	-0.2406	0.846393	AT4G10070.1	KH domain-containing protein
30187877	2	Pavir.Fa01338.1	0.2563	0.1683	-0.04	0.2083	1.15533	AT2G24170.1	Endomembrane protein 70 protein family
30187878	1	Pavir.Fa02200.1	0.4349	-0.5793	-0.04	-0.5393	0.688105	AT4G24270.1	EMBRYO DEFECTIVE 140
30187896	2	Pavir.Fa01887.1	0.4553	-0.3621	-0.04	-0.3221	0.799905	AT5G45420.1	Duplicated homeodomain-like superfamily protein
30187898	2	Pavir.Fa00453.1	0.472	-0.2844	-0.04	-0.2444	0.844167	AT5G63870.1	serine/threonine phosphatase 7
30187925	9	Pavir.Fa00133.1	0.0167	0.3202	-0.04	0.3602	1.2836	AT1G29880.1	glycyl-tRNA synthetase / glycine--tRNA ligase
30187947	1	Pavir.Fa01766.1	0.7643	0.1371	-0.04	0.1771	1.13061	AT2G32730.1	26S proteasome regulatory complex, non-ATPase subcomplex, Rpn2/Psmd1 subunit
30187972	27	Pavir.Fa00191.1	<.0001	0.4985	-0.04	0.5385	1.45246	AT3G27240.1	Cytochrome C1 family
30187977	5	Pavir.Fa00848.1	0.0295	-0.16843	-0.04	-0.12843	0.914826	AT5G37720.1	ALWAYS EARLY 4
30188046	23	Pavir.Fa00052.1	0.9287	-0.006995	-0.04	0.033005	1.02314	AT1G63770.3	Peptidase M1 family protein
30188064	2	Pavir.Fa00610.1	0.5654	-0.3276	-0.04	-0.2876	0.819264	AT1G22310.2	methyl-CPG-binding domain 8
30188069	1	Pavir.Fa02195.1	0.9591	-0.01364	-0.04	0.02636	1.01844	AT1G33810.1
30188078	2	Pavir.Fa00241.1	0.1627	0.3872	-0.04	0.4272	1.34462	AT1G80750.1	Ribosomal protein L30/L7 family protein
30188110	1	Pavir.Fa00203.1	0.5137	-0.2671	-0.04	-0.2271	0.854351	AT1G20550.1	O-fucosyltransferase family protein
30188127	2	Pavir.Fa00181.1	0.6462	0.1756	-0.04	0.2156	1.16119	AT1G08360.1	Ribosomal protein L1p/L10e family
30188181	1	Pavir.Fa01352.1	0.3477	0.5808	-0.04	0.6208	1.53773	AT4G30240.1	Syntaxin/t-SNARE family protein
30188196	1	Pavir.Fa00587.1	0.0428	-0.2966	-0.04	-0.2566	0.837058	AT3G13224.2	RNA-binding (RRM/RBD/RNP motifs) family protein
30188202	6	Pavir.Fa00956.1	0.523	0.1904	-0.04	0.2304	1.17316	AT1G74920.1	aldehyde dehydrogenase 10A8
30188224	1	Pavir.Fa00417.1	0.2441	-0.569	-0.04	-0.529	0.693035	AT3G21180.1	autoinhibited Ca(2+)-ATPase 9
30188232	3	Pavir.Fa00238.1	0.9274	0.02964	-0.04	0.06964	1.04945	AT5G42220.1	Ubiquitin-like superfamily protein
30188238	1	Pavir.Fa00450.1	0.256	0.3122	-0.04	0.3522	1.27651	AT2G33585.1
30188253	5	Pavir.Fa01340.1	0.7396	-0.0969	-0.04	-0.0569	0.961328	AT1G13960.1	WRKY DNA-binding protein 4
30188258	6	Pavir.Fa01133.1	0.0055	-0.18776	-0.04	-0.14776	0.902651	AT2G05990.1	NAD(P)-binding Rossmann-fold superfamily protein
30188272	11	Pavir.Fa02398.1	0.9623	-0.006114	-0.04	0.033886	1.02377	AT3G44330.1
30188280	3	Pavir.Fa00242.1	0.0923	-0.2936	-0.04	-0.2536	0.838801	AT3G59990.4	methionine aminopeptidase 2B
30188287	2	Pavir.Fa00860.1	0.4302	-0.3379	-0.04	-0.2979	0.813436	AT5G16040.1	Regulator of chromosome condensation (RCC1) family protein
30188290	1	Pavir.Fa02298.1	0.958	0.02715	-0.04	0.06715	1.04765	AT2G35110.2	transcription activators
30188295	1	Pavir.Fa00514.1	0.9116	-0.1201	-0.04	-0.0801	0.945992	AT2G04780.2	FASCICLIN-like arabinoogalactan 7
30188344	3	Pavir.Fa01019.1	0.0232	-1.0184	-0.04	-0.9784	0.507542	AT5G10770.1	Eukaryotic aspartyl protease family protein
30188379	2	Pavir.Fa00493.1	0.4337	-0.08637	-0.04	-0.04637	0.96837	AT2G42280.1	basic helix-loop-helix (bHLH) DNA-binding superfamily protein
30188384	2	Pavir.Fa00953.1	0.3798	0.4093	-0.04	0.4493	1.36538	AT4G22140.1	PHD finger family protein / bromo-adjacent homology (BAH) domain-containing protein
30188401	2	Pavir.Fa00663.1	0.4874	-0.1255	-0.04	-0.0855	0.942458	AT3G50520.1	Phosphoglycerate mutase family protein
30188430	5	Pavir.Fa00404.1	0.1933	0.1864	-0.04	0.2264	1.16991	AT2G31680.1	RAB GTPase homolog A5D
30188436	3	Pavir.Fa00399.1	0.1024	-0.2818	-0.04	-0.2418	0.84569	AT4G18100.1	Ribosomal protein L32e
30188443	1	Pavir.Fa01349.1	0.8656	0.0541	-0.04	0.0941	1.0674	AT3G21240.1	4-coumarate:CoA ligase 2
30188451	1	Pavir.Fa00329.1	0.5636	-0.5496	-0.04	-0.5096	0.702417	AT5G64300.1	GTP cyclohydrolase II
30188455	2	Pavir.Fa00188.1	0.4844	0.3483	-0.04	0.3883	1.30885	AT3G44620.1	protein tyrosine phosphatases;protein tyrosine phosphatases
30188480	1	Pavir.Fa00933.1	0.7361	-0.08244	-0.04	-0.04244	0.971011	AT1G49400.1	Nucleic acid-binding, OB-fold-like protein
30188483	5	Pavir.Fa01454.1	0.1154	-0.3016	-0.04	-0.2616	0.834162	AT2G18600.1	Ubiquitin-conjugating enzyme family protein
30188515	1	Pavir.Fa00012.1	0.7726	0.04052	-0.04	0.08052	1.0574	AT3G58170.1	BET1P/SFT1P-like protein 14A
30188517	1	Pavir.Fa00879.1	0.3809	-0.5593	-0.04	-0.5193	0.69771	AT3G01150.1	polypyrimidine tract-binding protein 1
30188547	2	Pavir.Fa01284.1	0.7667	0.05727	-0.04	0.09727	1.06975	AT5G57560.1	Xyloglucan endotransglucosylase/hydrolase family protein
30188558	2	Pavir.Fa00245.1	0.4396	-0.2078	-0.04	-0.1678	0.890199	AT1G08760.1	Plant protein of unknown function (DUF936)
30188577	1	Pavir.Fa00777.1	0.9937	0.003201	-0.04	0.043201	1.0304	AT1G73430.2	sec34-like family protein
30188590	9	Pavir.Fa00028.1	0.0472	0.2304	-0.04	0.2704	1.20614	AT5G66140.1	proteasome alpha subunit D2
30188610	15	Pavir.Fa01410.1	0.9971	0.0004824	-0.04	0.0404824	1.02846	AT3G03190.1	glutathione S-transferase F11
30188611	4	Pavir.Fa00471.1	0.5861	-0.1272	-0.04	-0.0872	0.941348	AT1G67325.1	Ran BP2/NZF zinc finger-like superfamily protein
30188638	11	Pavir.Fa01927.1	0.0217	0.2789	-0.04	0.3189	1.24738	AT4G00170.1	Plant VAMP (vesicle-associated membrane protein) family protein
30188663	1	Pavir.Fa00047.1	0.182	-0.5384	-0.04	-0.4984	0.707891	AT5G58330.1	lactate/malate dehydrogenase family protein
30188691	4	Pavir.Fa00961.1	0.7661	-0.04294	-0.04	-0.00294	0.997964	AT2G37050.3	Leucine-rich repeat protein kinase family protein
30188711	2	Pavir.Fa00050.1	0.5212	0.2342	-0.04	0.2742	1.20932	AT5G16310.1	Peptidase C12, ubiquitin carboxyl-terminal hydrolase 1
30188716	3	Pavir.Fa02067.1	0.3172	-0.2329	-0.04	-0.1929	0.874845	AT5G46190.1	RNA-binding KH domain-containing protein
30188726	19	Pavir.Fa02106.2	0.0015	0.4579	-0.04	0.4979	1.41216	AT1G31812.1	acyl-CoA-binding protein 6
30188742	1	Pavir.Fa00568.1	0.7683	0.3139	-0.04	0.3539	1.27801	AT5G63470.2	nuclear factor Y, subunit C4
30188745	1	Pavir.Fa00016.1	0.2056	-0.3727	-0.04	-0.3327	0.794049	AT3G50700.1	indeterminate(ID)-domain 2
30188767	2	Pavir.Fa00172.1	0.3791	0.2478	-0.04	0.2878	1.22078	AT5G04750.1	F1F0-ATPase inhibitor protein, putative
30188857	1	Pavir.J00569.1	0.5468	0.4262	-0.04	0.4662	1.38147	AT5G04000.1
30188858	1	Pavir.J00566.1	0.2766	0.9969	-0.04	1.0369	2.05181	AT1G56190.1	Phosphoglycerate kinase family protein
30188897	1	Pavir.J39591.1	0.3535	0.1066	-0.04	0.1466	1.10696	AT2G26140.1	FTSH protease 4
30188906	3	Pavir.J24201.1	0.5754	0.1986	-0.04	0.2386	1.17985	AT5G42180.1	Peroxidase superfamily protein
30188945	6	Pavir.J12086.1	0.1333	0.2644	-0.04	0.3044	1.2349	AT2G41770.1	Protein of unknown function (DUF288)
30188964	1	Pavir.J24178.1	0.443	0.1948	-0.04	0.2348	1.17674	AT3G60340.1	alpha/beta-Hydrolases superfamily protein
30188973	2	Pavir.J06917.1	0.6024	-0.1907	-0.04	-0.1507	0.900813	AT1G16470.2	proteasome subunit PAB1
30188993	1	Pavir.J12182.1	0.6988	0.1248	-0.04	0.1648	1.12101
30189009	1	Pavir.J40397.1	0.0232	-0.3808	-0.04	-0.3408	0.789603	AT5G11950.1	Putative lysine decarboxylase family protein
30189025	4	Pavir.J25628.1	0.2955	0.3152	-0.04	0.3552	1.27916	AT4G31860.1	Protein phosphatase 2C family protein
30189041	3	Pavir.J01289.1	0.5727	0.2107	-0.04	0.2507	1.18978	AT3G02100.1	UDP-Glycosyltransferase superfamily protein
30189084	1	Pavir.J21261.1	0.7603	-0.3848	-0.04	-0.3448	0.787417
30189085	1	Pavir.J22073.1	0.1701	0.6746	-0.04	0.7146	1.64103	AT5G18110.1	novel cap-binding protein
30189101	1	Pavir.J01243.1	0.7681	0.1942	-0.04	0.2342	1.17625	AT5G03170.1	FASCICLIN-like arabinogalactan-protein 11
30189139	5	Pavir.J09513.1	<.0001	-1.2486	-0.04	-1.2086	0.432688	ATCG00270.1	photosystem II reaction center protein D
30189163	1	Pavir.J06262.1	0.2169	-0.8485	-0.04	-0.8085	0.570975	AT4G32400.1	Mitochondrial substrate carrier family protein
30189177	6	Pavir.J03022.1	0.7913	-0.0306	-0.04	0.0094	1.00654	AT1G04980.1	PDI-like 2-2
30189214	10	Pavir.J05506.1	0.5076	-0.09018	-0.04	-0.05018	0.965816	AT3G12640.1	RNA binding (RRM/RBD/RNP motifs) family protein
30189239	1	Pavir.J38370.1	0.6344	0.2333	-0.04	0.2733	1.20857	AT5G03040.3	IQ-domain 2
30189287	5	Pavir.J07101.1	0.1754	-0.271	-0.04	-0.231	0.852044	AT2G44120.2	Ribosomal protein L30/L7 family protein
30189299	2	Pavir.J02589.1	0.9144	-0.03339	-0.04	0.00661	1.00459	AT1G53590.1	Calcium-dependent lipid-binding (CaLB domain) family protein
30189385	1	Pavir.J30763.1	0.4352	-0.31	-0.04	-0.27	0.82932	AT1G15520.1	pleiotropic drug resistance 12
30189411	4	Pavir.J34596.1	0.9278	0.01879	-0.04	0.05879	1.04159	AT3G57540.1	Remorin family protein
30189504	3	Pavir.J34246.1	0.1965	-0.1768	-0.04	-0.1368	0.909534	AT5G40760.1	glucose-6-phosphate dehydrogenase 6
30189520	1	Pavir.J26476.1	0.1468	0.5712	-0.04	0.6112	1.52753	AT4G08520.1	SNARE-like superfamily protein
30189559	2	Pavir.J19331.1	0.7803	0.0792	-0.04	0.1192	1.08613	AT2G14260.1	proline iminopeptidase
30189575	14	Pavir.J01059.1	0.8414	-0.02552	-0.04	0.01448	1.01009	AT2G46750.1	D-arabinono-1,4-lactone oxidase family protein
30189591	8	Pavir.J15301.1	0.0048	-0.5054	-0.04	-0.4654	0.72427	AT1G60730.3	NAD(P)-linked oxidoreductase superfamily protein
30189596	3	Pavir.J19668.1	0.3318	-0.1065	-0.04	-0.0665	0.954952	AT3G13410.1
30189695	1	Pavir.J02690.1	0.6489	0.1867	-0.04	0.2267	1.17016	AT4G34215.1	Domain of unknown function (DUF303)
30189739	1	Pavir.J01488.1	0.5024	0.554	-0.04	0.594	1.50943	AT3G05290.1	peroxisomal adenine nucleotide carrier 1
30189742	1	Pavir.J21638.1	0.168	0.3529	-0.04	0.3929	1.31303	AT5G09920.1	RNA polymerase II, Rpb4, core protein
30189821	5	Pavir.J05419.1	0.6066	-0.1216	-0.04	-0.0816	0.945009	AT3G55940.1	Phosphoinositide-specific phospholipase C family protein
30189833	2	Pavir.J34183.1	0.5698	0.3232	-0.04	0.3632	1.28628	AT2G20230.1	Tetraspanin family protein
30189836	1	Pavir.J06870.1	0.3552	-0.454	-0.04	-0.414	0.75054	AT1G75170.2	Sec14p-like phosphatidylinositol transfer family protein
30189942	1	Pavir.J13381.1	0.8558	-0.07469	-0.04	-0.03469	0.976242	AT5G25610.1	BURP domain-containing protein
30190005	4	Pavir.J34391.1	0.2882	0.3223	-0.04	0.3623	1.28547	AT5G22330.1	P-loop containing nucleoside triphosphate hydrolases superfamily protein
30190028	3	Pavir.J05634.1	0.1262	-0.4621	-0.04	-0.4221	0.746337	AT4G15940.1	Fumarylacetoacetate (FAA) hydrolase family
30190056	2	Pavir.J01494.1	0.1885	-0.6161	-0.04	-0.5761	0.670775	AT3G08860.1	PYRIMIDINE 4
30190058	1	Pavir.J01496.1	0.5276	-0.4106	-0.04	-0.3706	0.773461	AT2G38410.1	ENTH/VHS/GAT family protein
30190130	13	Pavir.J11885.1	0.3768	0.0985	-0.04	0.1385	1.10076	AT2G37170.1	plasma membrane intrinsic protein 2
30190132	4	Pavir.J37581.1	0.9866	-0.003128	-0.04	0.036872	1.02589	AT3G11400.1	eukaryotic translation initiation factor 3G1
30190141	13	Pavir.J38191.1	0.0739	-0.1999	-0.04	-0.1599	0.895087	AT1G07890.8	ascorbate peroxidase 1
30190170	2	Pavir.J02771.1	0.0135	0.3755	-0.04	0.4155	1.33376	AT4G31340.1	myosin heavy chain-related
30190171	1	Pavir.J02768.1	0.8316	0.1844	-0.04	0.2244	1.16829	AT4G12590.1	Protein of unknown function DUF106, transmembrane
30190190	1	Pavir.J27030.1	0.3137	0.4107	-0.04	0.4507	1.3667	AT1G04110.1	Subtilase family protein
30190213	3	Pavir.J02177.2	0.5527	0.1475	-0.04	0.1875	1.13879	AT4G26965.1	NADH:ubiquinone oxidoreductase, 17.2kDa subunit
30190217	12	Pavir.J33685.1	0.0043	-0.3933	-0.04	-0.3533	0.782792	AT2G39050.1	hydroxyproline-rich glycoprotein family protein
30190246	6	Pavir.J13355.1	0.4411	0.148	-0.04	0.188	1.13918	AT3G13224.2	RNA-binding (RRM/RBD/RNP motifs) family protein
30190258	1	Pavir.J06046.1	0.4932	-0.2167	-0.04	-0.1767	0.884724	AT5G40190.1	RNA ligase/cyclic nucleotide phosphodiesterase family protein
30190307	2	Pavir.J01096.1	0.3943	0.3167	-0.04	0.3567	1.28049	AT1G20970.1
30190313	3	Pavir.J30882.1	0.0046	-0.6183	-0.04	-0.5783	0.669753	AT4G13180.1	NAD(P)-binding Rossmann-fold superfamily protein
30190341	2	Pavir.J37010.1	0.6415	-0.2058	-0.04	-0.1658	0.891434	AT3G51000.1	alpha/beta-Hydrolases superfamily protein
30190353	3	Pavir.J10976.1	0.8782	0.0434	-0.04	0.0834	1.05951	AT2G37040.1	PHE ammonia lyase 1
30190366	6	Pavir.J10032.1	0.4744	-0.0896	-0.04	-0.0496	0.966204	AT3G09820.1	adenosine kinase 1
30190373	3	Pavir.J10676.1	0.7814	-0.06214	-0.04	-0.02214	0.984771	AT2G36760.1	UDP-glucosyl transferase 73C2
30190411	8	Pavir.J30588.1	0.0133	-0.23151	-0.04	-0.19151	0.875689	AT5G36890.1	beta glucosidase 42
30190422	5	Pavir.J00012.1	0.7145	-0.06615	-0.04	-0.02615	0.982037	AT3G06860.1	multifunctional protein 2
30190435	6	Pavir.J36980.1	0.0294	-0.3473	-0.04	-0.3073	0.808153	AT5G12200.1	pyrimidine 2
30190440	2	Pavir.J10057.1	0.2668	0.4155	-0.04	0.4555	1.37126	AT5G10770.1	Eukaryotic aspartyl protease family protein
30190444	2	Pavir.J04554.1	0.2795	-0.1888	-0.04	-0.1488	0.902	AT3G62760.1	Glutathione S-transferase family protein
30190464	2	Pavir.J08324.1	0.6031	-0.06176	-0.04	-0.02176	0.98503	AT3G52750.1	Tubulin/FtsZ family protein
30190504	1	Pavir.J06721.1	0.5601	-0.1658	-0.04	-0.1258	0.916496	AT1G72710.1	casein kinase 1-like protein 2
30190514	3	Pavir.J05875.1	0.4057	-0.2335	-0.04	-0.1935	0.874482	AT4G37930.1	serine transhydroxymethyltransferase 1
30190529	5	Pavir.J13162.1	0.9305	0.01006	-0.04	0.05006	1.03531	AT4G08950.1	Phosphate-responsive 1 family protein
30190533	2	Pavir.J23967.1	0.555	0.1755	-0.04	0.2155	1.16111	AT2G03870.2	Small nuclear ribonucleoprotein family protein
30190536	2	Pavir.J06449.1	0.7281	-0.09519	-0.04	-0.05519	0.962468	AT2G35920.1	RNA helicase family protein
30190575	3	Pavir.J18872.1	0.8886	-0.04763	-0.04	-0.00763	0.994725	AT1G27430.1	GYF domain-containing protein
30190591	4	Pavir.J22323.1	0.1594	-0.2515	-0.04	-0.2115	0.863639	AT1G79090.1
30190595	6	Pavir.J36970.1	0.3369	0.1482	-0.04	0.1882	1.13934	AT5G26830.1	Threonyl-tRNA synthetase
30190603	9	Pavir.J08344.1	0.603	0.08311	-0.04	0.12311	1.08908	AT2G19520.1	Transducin family protein / WD-40 repeat family protein
30190611	3	Pavir.J04522.1	0.0246	-0.7272	-0.04	-0.6872	0.621058	AT1G74270.1	Ribosomal protein L35Ae family protein
30190667	8	Pavir.J22514.1	0.0514	-0.3156	-0.04	-0.2756	0.826107	AT5G23950.1	Calcium-dependent lipid-binding (CaLB domain) family protein
30190674	7	Pavir.J02812.1	0.4497	0.1688	-0.04	0.2088	1.15573	AT3G56430.1
30190681	1	Pavir.J01684.1	0.0957	-0.2185	-0.04	-0.1785	0.883621	AT3G12500.1	basic chitinase
30190683	19	Pavir.J01685.1	0.0003	-0.31375	-0.04	-0.27375	0.827167	AT5G49910.1	chloroplast heat shock protein 70-2
30190713	2	Pavir.J05093.1	0.8089	-0.1277	-0.04	-0.0877	0.941022	AT4G13400.1	2-oxoglutarate (2OG) and Fe(II)-dependent oxygenase superfamily protein
30190714	15	Pavir.J05095.1	0.049	0.17579	-0.04	0.21579	1.16134	AT5G42080.1	dynamin-like protein
30190733	1	Pavir.J03198.1	0.9364	0.02287	-0.04	0.06287	1.04454	AT2G35460.1	Late embryogenesis abundant (LEA) hydroxyproline-rich glycoprotein family
30190739	6	Pavir.J06686.1	0.1633	-0.3946	-0.04	-0.3546	0.782086	AT5G60460.1	Preprotein translocase Sec, Sec61-beta subunit protein
30190748	2	Pavir.J31545.1	0.564	-0.14	-0.04	-0.1	0.933033	AT1G70740.1	Protein kinase superfamily protein
30190774	2	Pavir.J23313.1	0.7107	0.1027	-0.04	0.1427	1.10397	AT3G62160.1	HXXXD-type acyl-transferase family protein
30190799	1	Pavir.J06069.1	0.985	0.01483	-0.04	0.05483	1.03874	AT5G24010.1	Protein kinase superfamily protein
30190822	3	Pavir.J37099.1	0.3827	-0.1109	-0.04	-0.0709	0.952044	AT1G30580.1	GTP binding
30190823	3	Pavir.J14626.1	0.0553	0.6005	-0.04	0.6405	1.55887	AT1G56190.1	Phosphoglycerate kinase family protein
30190876	11	Pavir.J11386.1	0.2879	-0.08998	-0.04	-0.04998	0.96595	AT5G26710.1	Glutamyl/glutaminyl-tRNA synthetase, class Ic
30190884	1	Pavir.J10323.1	0.8922	0.03831	-0.04	0.07831	1.05578	AT2G19590.1	ACC oxidase 1
30190908	10	Pavir.J39506.1	0.0449	-0.2682	-0.04	-0.2282	0.853699	AT5G17990.1	tryptophan biosynthesis 1
30190984	1	Pavir.J03348.1	0.3709	-0.3636	-0.04	-0.3236	0.799073	AT4G38660.1	Pathogenesis-related thaumatin superfamily protein
30190988	10	Pavir.J03458.1	0.8643	-0.02823	-0.04	0.01177	1.00819	AT5G09760.1	Plant invertase/pectin methylesterase inhibitor superfamily
30191016	6	Pavir.J16649.1	0.598	0.08372	-0.04	0.12372	1.08954	AT5G07990.1	Cytochrome P450 superfamily protein
30191049	2	Pavir.J01816.1	0.9539	-0.0096	-0.04	0.0304	1.0213	AT1G02816.1	Protein of unknown function, DUF538
30191095	1	Pavir.J27909.1	0.3625	0.7061	-0.04	0.7461	1.67725	AT5G67490.1
30191141	7	Pavir.J10341.1	0.1053	0.2253	-0.04	0.2653	1.20189	AT3G17390.1	S-adenosylmethionine synthetase family protein
30191166	1	Pavir.J01053.1	0.4028	0.726	-0.04	0.766	1.70055	AT3G51980.1	ARM repeat superfamily protein
30191191	3	Pavir.J07226.1	0.8379	-0.05921	-0.04	-0.01921	0.986773	AT5G13110.1	glucose-6-phosphate dehydrogenase 2
30191198	3	Pavir.J03540.1	0.0047	1.0724	-0.04	1.1124	2.16205	AT1G43800.1	Plant stearoyl-acyl-carrier-protein desaturase family protein
30191211	5	Pavir.J34899.1	0.0805	-0.2879	-0.04	-0.2479	0.842121	AT3G47520.1	malate dehydrogenase
30191245	3	Pavir.J05313.1	0.5331	-0.1553	-0.04	-0.1153	0.92319	AT1G15020.2	quiescin-sulfhydryl oxidase 1
30191258	9	Pavir.J16987.1	0.0527	-0.3536	-0.04	-0.3136	0.804631	AT2G24580.1	FAD-dependent oxidoreductase family protein
30191272	3	Pavir.J05710.1	0.0725	-0.2145	-0.04	-0.1745	0.886075	AT4G25450.1	non-intrinsic ABC protein 8
30191332	1	Pavir.J11595.1	0.2115	-0.2511	-0.04	-0.2111	0.863878	AT3G11950.1	TRAF-like superfamily protein
30191351	4	Pavir.J08086.1	0.5514	-0.08954	-0.04	-0.04954	0.966244	AT2G33845.1	Nucleic acid-binding, OB-fold-like protein
30191371	1	Pavir.Da00305.1	0.2968	0.479	-0.04	0.519	1.43296	AT4G28050.1	tetraspanin7
30191396	3	Pavir.Da02178.1	0.2838	-0.3754	-0.04	-0.3354	0.792564	AT1G13060.1	20S proteasome beta subunit E1
30191401	6	Pavir.Da01251.1	0.5594	-0.08907	-0.04	-0.04907	0.966559	AT2G15780.1	Cupredoxin superfamily protein
30191412	1	Pavir.Da00914.1	0.7469	-0.1386	-0.04	-0.0986	0.933939	AT5G55050.1	GDSL-like Lipase/Acylhydrolase superfamily protein
30191421	2	Pavir.Da02035.1	0.7295	-0.1143	-0.04	-0.0743	0.949803	AT1G02305.1	Cysteine proteinases superfamily protein
30191424	1	Pavir.Da01068.1	0.2345	-0.2973	-0.04	-0.2573	0.836652	AT3G18180.1	Glycosyltransferase family 61 protein
30191428	6	Pavir.Da01866.1	0.0091	0.3282	-0.04	0.3682	1.29074	AT4G31580.1	serine/arginine-rich 22
30191433	1	Pavir.Da00092.1	0.3428	-0.8894	-0.04	-0.8494	0.555016	AT5G54570.1	beta glucosidase 41
30191437	2	Pavir.Da01778.1	0.0851	-0.4564	-0.04	-0.4164	0.749292	AT3G47650.1	DnaJ/Hsp40 cysteine-rich domain superfamily protein
30191449	3	Pavir.Da02413.1	0.0453	0.5052	-0.04	0.5452	1.45922	AT3G13200.1	Cwf15 / Cwc15 cell cycle control family protein
30191454	3	Pavir.Da00834.1	0.3702	-0.1026	-0.04	-0.0626	0.957537	AT1G65480.1	PEBP (phosphatidylethanolamine-binding protein) family protein
30191457	1	Pavir.Da00234.1	0.4188	0.17	-0.04	0.21	1.15669	AT2G40300.1	ferritin 4
30191491	21	Pavir.Da01308.1	<.0001	0.6805	-0.04	0.7205	1.64775	AT5G65020.1	annexin 2
30191504	6	Pavir.Da02211.1	0.2917	0.2091	-0.04	0.2491	1.18847	AT2G19480.3	nucleosome assembly protein 1;2
30191507	1	Pavir.Da00799.1	0.2384	-0.2217	-0.04	-0.1817	0.881663	AT3G18180.1	Glycosyltransferase family 61 protein
30191508	1	Pavir.Da02383.1	0.1836	-0.7074	-0.04	-0.6674	0.62964	AT5G17210.1	Protein of unknown function (DUF1218)
30191515	2	Pavir.Da00257.1	0.3073	0.472	-0.04	0.512	1.42603	AT5G44730.1	Haloacid dehalogenase-like hydrolase (HAD) superfamily protein
30191532	13	Pavir.Da02283.1	0.0546	-0.19391	-0.04	-0.15391	0.898811	AT3G45030.1	Ribosomal protein S10p/S20e family protein
30191557	10	Pavir.Da00981.1	0.0231	-0.4964	-0.04	-0.4564	0.728803	AT1G53280.1	Class I glutamine amidotransferase-like superfamily protein
30191561	3	Pavir.Da01373.1	0.0151	-0.3502	-0.04	-0.3102	0.80653	AT1G26110.1	decapping 5
30191564	6	Pavir.Da01892.1	0.9256	0.02355	-0.04	0.06355	1.04503	AT3G43190.1	sucrose synthase 4
30191568	1	Pavir.Da01860.1	0.2787	-0.5378	-0.04	-0.4978	0.708186	AT5G17050.1	UDP-glucosyl transferase 78D2
30191591	1	Pavir.Da00518.1	0.9091	0.01866	-0.04	0.05866	1.0415	AT5G12950.1	Putative glycosyl hydrolase of unknown function (DUF1680)
30191644	2	Pavir.Da00360.1	0.5645	-0.107	-0.04	-0.067	0.954621	AT5G19300.1
30191650	1	Pavir.Da00694.1	0.4667	-0.1844	-0.04	-0.1444	0.904756	AT4G32400.1	Mitochondrial substrate carrier family protein
30191651	5	Pavir.Da00191.1	0.8958	0.03085	-0.04	0.07085	1.05034	AT3G20290.1	EPS15 homology domain 1
30191658	3	Pavir.Da01223.1	0.0438	0.5186	-0.04	0.5586	1.47284	AT1G70670.1	Caleosin-related family protein
30191666	2	Pavir.Da00443.1	0.6708	0.2046	-0.04	0.2446	1.18476	AT3G46920.1	Protein kinase superfamily protein with octicosapeptide/Phox/Bem1p domain
30191699	5	Pavir.Da00522.1	0.8258	-0.04472	-0.04	-0.00472	0.996734
30191706	2	Pavir.Da00702.1	0.7202	0.1257	-0.04	0.1657	1.12171	AT5G19485.1	transferases;nucleotidyltransferases
30191743	1	Pavir.Da02123.1	0.9758	-0.009431	-0.04	0.030569	1.02141	AT3G01300.1	Protein kinase superfamily protein
30191766	1	Pavir.Da00647.1	0.4424	0.7293	-0.04	0.7693	1.70444	AT4G32690.1	hemoglobin 3
30191805	21	Pavir.Da00086.1	0.3219	0.0965	-0.04	0.1365	1.09924	AT3G52580.1	Ribosomal protein S11 family protein
30191828	2	Pavir.Da01419.1	0.4053	0.2269	-0.04	0.2669	1.20322	AT1G22330.1	RNA-binding (RRM/RBD/RNP motifs) family protein
30191837	5	Pavir.Da02164.1	0.5968	0.09721	-0.04	0.13721	1.09978	AT1G30480.1	D111/G-patch domain-containing protein
30191861	1	Pavir.Da00503.1	0.6492	0.1388	-0.04	0.1788	1.13194	AT2G33590.1	NAD(P)-binding Rossmann-fold superfamily protein
30191872	1	Pavir.Da00122.1	0.3746	-0.8079	-0.04	-0.7679	0.587272	AT3G50210.3	2-oxoglutarate (2OG) and Fe(II)-dependent oxygenase superfamily protein
30191896	1	Pavir.Da00464.1	0.2865	-0.3327	-0.04	-0.2927	0.816373	AT4G32250.1	Protein kinase superfamily protein
30191907	3	Pavir.Da00781.1	0.7128	-0.1042	-0.04	-0.0642	0.956476	AT2G26040.1	PYR1-like 2
30191930	2	Pavir.Da01080.1	0.5333	0.2228	-0.04	0.2628	1.19981	AT5G17560.1	BolA-like family protein
30191959	4	Pavir.Da01911.1	0.8414	0.07095	-0.04	0.11095	1.07994	AT5G38470.1	Rad23 UV excision repair protein family
30191968	6	Pavir.Da02424.1	0.6389	-0.1167	-0.04	-0.0767	0.948224	AT4G12420.1	Cupredoxin superfamily protein
30191969	5	Pavir.Da00574.1	0.9296	-0.02329	-0.04	0.01671	1.01165	AT1G06220.2	Ribosomal protein S5/Elongation factor G/III/V family protein
30192000	1	Pavir.Da01422.1	0.2338	-0.7507	-0.04	-0.7107	0.611024	AT5G07900.1	Mitochondrial transcription termination factor family protein
30192014	1	Pavir.Da02382.1	0.7264	0.2683	-0.04	0.3083	1.23825	AT1G01170.1	Protein of unknown function (DUF1138)
30192016	1	Pavir.Da00544.1	0.4553	-0.5951	-0.04	-0.5551	0.68061	AT5G39990.1	Core-2/I-branching beta-1,6-N-acetylglucosaminyltransferase family protein
30192049	2	Pavir.Da00118.1	0.1935	-0.4462	-0.04	-0.4062	0.754608	AT5G67230.1	Nucleotide-diphospho-sugar transferases superfamily protein
30192088	3	Pavir.Da00354.1	0.5028	0.101	-0.04	0.141	1.10267	AT2G43360.1	Radical SAM superfamily protein
30192113	2	Pavir.Da00665.1	0.9417	-0.01178	-0.04	0.02822	1.01975	AT3G28720.1
30192132	3	Pavir.Da02246.1	0.4425	-0.1417	-0.04	-0.1017	0.931934	AT1G04870.2	protein arginine methyltransferase 10
30192161	1	Pavir.Da01328.1	0.8693	0.1531	-0.04	0.1931	1.14322	AT1G72230.1	Cupredoxin superfamily protein
30192170	3	Pavir.Da01928.1	0.6942	-0.1	-0.04	-0.06	0.959264	AT5G42890.1	sterol carrier protein 2
30192175	2	Pavir.Da01086.1	0.2934	0.113	-0.04	0.153	1.11188	AT1G20430.1
30192183	4	Pavir.Da00289.1	0.0039	0.3772	-0.04	0.4172	1.33533	AT5G20500.1	Glutaredoxin family protein
30192190	1	Pavir.Da00018.1	0.0509	0.7559	-0.04	0.7959	1.73616	AT4G32690.1	hemoglobin 3
30192193	2	Pavir.Da01937.1	0.1882	-0.3845	-0.04	-0.3445	0.787581	AT3G18035.1	winged-helix DNA-binding transcription factor family protein
30192227	10	Pavir.Da01110.1	0.5804	-0.1015	-0.04	-0.0615	0.958267	AT5G14720.1	Protein kinase superfamily protein
30192244	1	Pavir.Da02025.1	0.9988	0.001308	-0.04	0.041308	1.02905	AT1G15690.1	Inorganic H pyrophosphatase family protein
30192246	2	Pavir.Da00283.1	0.2744	-0.38	-0.04	-0.34	0.790041	AT5G05080.2	ubiquitin-conjugating enzyme 22
30192247	1	Pavir.Da00070.1	0.4031	0.6661	-0.04	0.7061	1.63139	AT2G34630.1	geranyl diphosphate synthase 1
30192277	3	Pavir.Da02032.1	0.059	-0.5135	-0.04	-0.4735	0.720215	AT2G33990.1	IQ-domain 9
30192280	3	Pavir.Da01858.1	0.1829	-0.2375	-0.04	-0.1975	0.87206	AT1G74270.1	Ribosomal protein L35Ae family protein
30192315	3	Pavir.Da01920.1	0.6358	0.1479	-0.04	0.1879	1.1391	AT5G10240.1	asparagine synthetase 3
30192364	1	Pavir.Da01730.1	0.1445	-0.6204	-0.04	-0.5804	0.668778	AT1G77140.1	vacuolar protein sorting 45
30192387	6	Pavir.Da00533.1	0.5006	0.1033	-0.04	0.1433	1.10443	AT1G17720.2	Protein phosphatase 2A, regulatory subunit PR55
30192393	1	Pavir.Da02251.1	0.6238	0.1025	-0.04	0.1425	1.10382	AT5G20070.1	nudix hydrolase homolog 19
30192408	10	Pavir.Da02354.1	0.0018	0.3748	-0.04	0.4148	1.33311	AT5G07220.1	BCL-2-associated athanogene 3
30192409	1	Pavir.Da01194.1	0.2673	0.3296	-0.04	0.3696	1.29199	AT2G04690.1	Pyridoxamine 5\'-phosphate oxidase family protein
30192442	2	Pavir.Da00264.1	0.3447	0.2682	-0.04	0.3082	1.23816	AT2G07180.1	Protein kinase superfamily protein
30192453	1	Pavir.Da01155.1	0.7853	-0.2971	-0.04	-0.2571	0.836768	AT5G54440.1	CLUB
30192456	1	Pavir.Da01503.1	0.6797	0.2127	-0.04	0.2527	1.19143	AT5G42850.1	Thioredoxin superfamily protein
30192467	29	Pavir.Da02207.1	0.0397	-0.15796	-0.04	-0.11796	0.92149	AT5G56600.1	profilin 3
30192483	1	Pavir.Da02115.1	0.9625	0.02067	-0.04	0.06067	1.04295	AT5G45910.1	GDSL-like Lipase/Acylhydrolase superfamily protein
30192494	6	Pavir.Da00764.1	0.1678	0.1464	-0.04	0.1864	1.13792	AT3G13772.1	transmembrane nine 7
30192515	6	Pavir.Da01203.1	0.2291	0.11755	-0.04	0.15755	1.11539	AT3G48140.1	B12D protein
30192521	1	Pavir.Da02219.1	0.5321	-0.3834	-0.04	-0.3434	0.788182	AT4G29810.1	MAP kinase kinase 2
30192539	4	Pavir.Da00497.1	0.1302	0.2617	-0.04	0.3017	1.2326	AT2G33430.1	differentiation and greening-like 1
30192544	2	Pavir.Da01740.1	0.1068	-0.2449	-0.04	-0.2049	0.867599	AT5G19485.1	transferases;nucleotidyltransferases
30192554	6	Pavir.Da00777.1	0.0147	0.4526	-0.04	0.4926	1.40698	AT1G24510.1	TCP-1/cpn60 chaperonin family protein
30192557	1	Pavir.Da00526.1	0.9043	0.1156	-0.04	0.1556	1.11388	AT4G38200.1	SEC7-like guanine nucleotide exchange family protein
30192575	1	Pavir.Da01237.1	0.878	-0.06218	-0.04	-0.02218	0.984744	AT2G01660.1	plasmodesmata-located protein 6
30192597	1	Pavir.Da01998.1	0.1332	1.2804	-0.04	1.3204	2.49735	AT5G36210.1	alpha/beta-Hydrolases superfamily protein
30192598	7	Pavir.Da01109.1	0.2789	0.1743	-0.04	0.2143	1.16014	AT5G14780.1	formate dehydrogenase
30192609	2	Pavir.Da01926.1	0.6417	0.1314	-0.04	0.1714	1.12615	AT5G26330.1	Cupredoxin superfamily protein
30192625	3	Pavir.Da01644.1	0.0216	-0.8375	-0.04	-0.7975	0.575345	AT1G53670.1	methionine sulfoxide reductase B 1
30192728	37	Pavir.Da01168.1	0.2866	0.08569	-0.04	0.12569	1.09103	AT5G39570.1
30192740	4	Pavir.Da01252.1	0.2916	0.177	-0.04	0.217	1.16231	AT4G23180.1	cysteine-rich RLK (RECEPTOR-like protein kinase) 10
30192743	5	Pavir.Da02438.1	0.2749	0.3364	-0.04	0.3764	1.2981	AT1G29400.2	MEI2-like protein 5
30192796	4	Pavir.Da00645.1	0.0989	0.1916	-0.04	0.2316	1.17414	AT3G24503.1	aldehyde dehydrogenase 2C4
30192808	8	Pavir.Da00362.1	0.9612	-0.005315	-0.04	0.034685	1.02433	AT1G76550.1	Phosphofructokinase family protein
30192815	1	Pavir.Da00337.1	0.2609	-0.8114	-0.04	-0.7714	0.585849	AT5G50140.1	Ankyrin repeat family protein
30192817	6	Pavir.Da02210.1	0.0036	-0.5404	-0.04	-0.5004	0.706911	AT3G59760.1	O-acetylserine (thiol) lyase isoform C
30192822	12	Pavir.Da02386.1	0.7563	-0.03521	-0.04	0.00479	1.00333	AT3G13470.1	TCP-1/cpn60 chaperonin family protein
30192856	1	Pavir.Da00882.1	0.2133	0.3179	-0.04	0.3579	1.28156	AT3G51840.1	acyl-CoA oxidase 4
30192897	1	Pavir.Da02371.1	0.949	-0.05713	-0.04	-0.01713	0.988197	AT1G31812.1	acyl-CoA-binding protein 6
30192898	1	Pavir.Da01946.1	0.9362	-0.01811	-0.04	0.02189	1.01529	AT4G08350.1	global transcription factor group A2
30192909	8	Pavir.Da02196.1	0.2642	-0.10565	-0.04	-0.06565	0.955515	AT5G45910.1	GDSL-like Lipase/Acylhydrolase superfamily protein
30192915	1	Pavir.Da02297.1	0.2874	-0.7591	-0.04	-0.7191	0.607476
30192916	5	Pavir.Da00117.1	0.2424	0.1475	-0.04	0.1875	1.13879	AT3G50220.1	Protein of unknown function (DUF579)
30192925	8	Pavir.Da00172.1	0.8992	-0.01609	-0.04	0.02391	1.01671	ATMG00560.1	Nucleic acid-binding, OB-fold-like protein
30192930	1	Pavir.Da00145.1	0.0204	-0.7626	-0.04	-0.7226	0.606004	AT4G30170.1	Peroxidase family protein
30192932	3	Pavir.Da01475.2	0.61	-0.1073	-0.04	-0.0673	0.954423	AT3G16090.1	RING/U-box superfamily protein
30192948	2	Pavir.Da02261.1	0.4477	0.3436	-0.04	0.3836	1.30459	AT2G18030.1	Peptide methionine sulfoxide reductase family protein
30192950	3	Pavir.Da01938.1	0.9669	0.01075	-0.04	0.05075	1.0358	AT4G00250.1	DNA-binding storekeeper protein-related transcriptional regulator
30192975	1	Pavir.Da00265.1	0.7155	0.1773	-0.04	0.2173	1.16256	AT5G35400.2	Pseudouridine synthase family protein
30192983	2	Pavir.Da00061.1	0.5435	-0.1104	-0.04	-0.0704	0.952374	AT5G60580.3	RING/U-box superfamily protein
30192989	2	Pavir.Da00480.1	0.9912	0.004477	-0.04	0.044477	1.03131	AT5G47650.1	nudix hydrolase homolog 2
30193002	2	Pavir.Da00568.1	0.1894	0.1871	-0.04	0.2271	1.17048	AT5G14420.3	RING domain ligase2
30193012	2	Pavir.Da02099.1	0.7375	-0.05062	-0.04	-0.01062	0.992666	AT5G20250.4	Raffinose synthase family protein
30193018	1	Pavir.Da01286.1	0.421	-0.1749	-0.04	-0.1349	0.910733	AT1G74460.1	GDSL-like Lipase/Acylhydrolase superfamily protein
30193025	2	Pavir.Da00254.1	0.4207	-0.3105	-0.04	-0.2705	0.829032	AT2G35010.2	thioredoxin O1
30193034	7	Pavir.Da00585.1	0.3977	-0.2092	-0.04	-0.1692	0.889336	AT5G20200.1	nucleoporin-related
30193042	1	Pavir.Da02368.1	0.254	-0.5184	-0.04	-0.4784	0.717773	AT4G29430.1	ribosomal protein S15A E
30193057	25	Pavir.Da01210.1	0.3198	-0.09667	-0.04	-0.05667	0.961481	AT1G59610.1	dynamin-like 3
30193058	4	Pavir.Da02400.1	0.0123	0.7263	-0.04	0.7663	1.7009	AT2G38740.1	Haloacid dehalogenase-like hydrolase (HAD) superfamily protein
30193059	5	Pavir.Da00654.1	0.9887	-0.003613	-0.04	0.036387	1.02554	AT5G62550.1
30193066	1	Pavir.Da00090.1	0.9744	-0.002485	-0.04	0.037515	1.02634	AT5G54600.1	Translation protein SH3-like family protein
30193071	1	Pavir.Da00110.1	0.6864	-0.1004	-0.04	-0.0604	0.958998	AT5G51540.1	Zincin-like metalloproteases family protein
30193086	2	Pavir.Da00290.1	0.961	-0.008303	-0.04	0.031697	1.02221	AT4G30160.2	villin 4
30193089	3	Pavir.Da02314.1	0.6514	0.1079	-0.04	0.1479	1.10796	AT1G76940.1	RNA-binding (RRM/RBD/RNP motifs) family protein
30193093	3	Pavir.Da01414.1	0.396	-0.1228	-0.04	-0.0828	0.944223	AT1G20030.2	Pathogenesis-related thaumatin superfamily protein
30193118	1	Pavir.Da02114.1	0.3495	-0.2253	-0.04	-0.1853	0.879466	AT5G20400.1	2-oxoglutarate (2OG) and Fe(II)-dependent oxygenase superfamily protein
30193130	1	Pavir.Da01335.1	0.6987	-0.1588	-0.04	-0.1188	0.920953	AT3G21350.2	RNA polymerase transcriptional regulation mediator-related
30193142	1	Pavir.Da01178.1	0.1827	0.2926	-0.04	0.3326	1.25928	AT3G28150.1	TRICHOME BIREFRINGENCE-LIKE 22
30193147	1	Pavir.Da00357.1	0.6822	0.1961	-0.04	0.2361	1.1778	AT2G24170.1	Endomembrane protein 70 protein family
30193188	15	Pavir.Da00938.1	0.1071	0.1932	-0.04	0.2332	1.17544	AT4G20820.1	FAD-binding Berberine family protein
30193243	1	Pavir.Da02256.1	0.5697	0.4905	-0.04	0.5305	1.44443	AT1G02100.1	Leucine carboxyl methyltransferase
30193286	4	Pavir.Da01997.1	0.0055	0.5545	-0.04	0.5945	1.50995	AT1G01800.1	NAD(P)-binding Rossmann-fold superfamily protein
30193315	1	Pavir.Da01935.1	0.0143	0.26807	-0.04	0.30807	1.23805	AT1G09580.1	emp24/gp25L/p24 family/GOLD family protein
30193317	1	Pavir.Da00800.1	0.3821	-0.986	-0.04	-0.946	0.51907	AT3G18170.1	Glycosyltransferase family 61 protein
30193322	9	Pavir.Da01790.1	0.0505	-0.3388	-0.04	-0.2988	0.812928	AT4G39230.1	NmrA-like negative transcriptional regulator family protein
30193340	3	Pavir.Da00669.1	0.3557	-0.1713	-0.04	-0.1313	0.913008	AT4G13360.1	ATP-dependent caseinolytic (Clp) protease/crotonase family protein
30193345	18	Pavir.Da02287.1	0.0023	-0.25133	-0.04	-0.21133	0.863741	AT2G45290.1	Transketolase
30193358	1	Pavir.Da02054.1	0.9904	-0.01169	-0.04	0.02831	1.01982	AT3G46920.1	Protein kinase superfamily protein with octicosapeptide/Phox/Bem1p domain
30193365	2	Pavir.Da00112.1	0.3994	-0.1488	-0.04	-0.1088	0.927359	AT1G15270.1	Translation machinery associated TMA7
30193392	1	Pavir.Da00332.1	0.9139	-0.0601	-0.04	-0.0201	0.986164	AT5G47690.3	binding
30193400	8	Pavir.Da01172.1	0.0546	-0.429	-0.04	-0.389	0.763659	AT5G16710.1	dehydroascorbate reductase 1
30193445	1	Pavir.Da00542.1	0.7468	0.09794	-0.04	0.13794	1.10033	AT5G16990.1	Zinc-binding dehydrogenase family protein
30193447	2	Pavir.Da01942.1	0.8443	-0.08519	-0.04	-0.04519	0.969162	AT4G20330.1	Transcription initiation factor TFIIE, beta subunit
30193454	1	Pavir.Da00999.1	0.7815	-0.057	-0.04	-0.017	0.988286	AT3G07790.1	DGCR14-related
30193459	1	Pavir.Da00688.1	0.5385	0.2205	-0.04	0.2605	1.19789	AT1G53720.1	cyclophilin 59
30193464	4	Pavir.Da00586.1	0.8329	-0.0607	-0.04	-0.0207	0.985754	AT4G32330.1	TPX2 (targeting protein for Xklp2) protein family
30193466	1	Pavir.Da00527.1	0.104	1.0594	-0.04	1.0994	2.14266	AT1G76460.1	RNA-binding (RRM/RBD/RNP motifs) family protein
30193491	3	Pavir.Da00754.1	0.7685	-0.07334	-0.04	-0.03334	0.977155	AT3G13750.1	beta galactosidase 1
30193495	1	Pavir.Da01913.1	0.9152	0.01852	-0.04	0.05852	1.0414	AT5G03370.1	acylphosphatase family
30193558	10	Pavir.Da00246.1	<.0001	-0.6812	-0.04	-0.6412	0.641179	AT5G34850.1	purple acid phosphatase 26
30193562	3	Pavir.Da01650.1	0.0633	-0.6029	-0.04	-0.5629	0.67694	AT1G23800.1	aldehyde dehydrogenase 2B7
30193584	10	Pavir.Da00165.1	0.3244	-0.1592	-0.04	-0.1192	0.920698	AT2G27100.1	C2H2 zinc-finger protein SERRATE (SE)
30193625	1	Pavir.Da02270.1	0.4379	-0.1721	-0.04	-0.1321	0.912502	AT5G45600.1	YEATS family protein
30193631	1	Pavir.Da00161.1	0.4902	0.1241	-0.04	0.1641	1.12047	AT5G10750.1	Protein of unknown function (DUF1336)
30193638	3	Pavir.Da01972.1	0.3666	0.1733	-0.04	0.2133	1.15934	AT5G36210.1	alpha/beta-Hydrolases superfamily protein
30193652	1	Pavir.Da00035.1	0.3789	-1.102	-0.04	-1.062	0.478968	AT1G11660.1	heat shock protein 70 (Hsp 70) family protein
30193662	4	Pavir.Da00766.1	0.6315	-0.1124	-0.04	-0.0724	0.951055	AT3G13224.2	RNA-binding (RRM/RBD/RNP motifs) family protein
30193683	13	Pavir.Da01556.1	<.0001	-0.7016	-0.04	-0.6616	0.632177	AT1G27480.1	alpha/beta-Hydrolases superfamily protein
30193703	6	Pavir.Da00147.1	0.5412	-0.1908	-0.04	-0.1508	0.900751	AT2G18980.1	Peroxidase superfamily protein
30193716	4	Pavir.Da00541.1	0.0395	0.2801	-0.04	0.3201	1.24842	AT2G26670.1	Plant haem oxygenase (decyclizing) family protein
30193724	5	Pavir.Da01688.1	<.0001	-0.5469	-0.04	-0.5069	0.703733	AT1G17180.1	glutathione S-transferase TAU 25
30193730	3	Pavir.Da02048.1	0.9373	0.0171	-0.04	0.0571	1.04037	AT3G57050.1	cystathionine beta-lyase
30193762	1	Pavir.Da01165.1	0.7676	0.2091	-0.04	0.2491	1.18847	AT5G53400.1	HSP20-like chaperones superfamily protein
30193786	2	Pavir.Da00218.1	0.3131	0.2875	-0.04	0.3275	1.25484	AT3G26330.1	cytochrome P450, family 71, subfamily B, polypeptide 37
30193798	2	Pavir.Da01207.1	0.6964	-0.06603	-0.04	-0.02603	0.982119	AT1G24180.1	Thiamin diphosphate-binding fold (THDP-binding) superfamily protein
30193803	20	Pavir.Da00014.1	0.8656	0.02012	-0.04	0.06012	1.04255	AT1G05260.1	Peroxidase superfamily protein
30193812	1	Pavir.Da00927.1	0.4366	-0.3353	-0.04	-0.2953	0.814903	AT5G05340.1	Peroxidase superfamily protein
30193815	1	Pavir.Da01104.1	0.0977	0.4277	-0.04	0.4677	1.3829	AT1G68710.1	ATPase E1-E2 type family protein / haloacid dehalogenase-like hydrolase family protein
30193825	8	Pavir.Da01321.1	0.0729	0.2358	-0.04	0.2758	1.21067	AT5G65260.1	RNA-binding (RRM/RBD/RNP motifs) family protein
30193830	10	Pavir.Da01772.1	0.67	-0.04809	-0.04	-0.00809	0.994408	AT1G48160.1	signal recognition particle 19 kDa protein, putative / SRP19, putative
30193847	3	Pavir.Da00260.1	0.6539	-0.09742	-0.04	-0.05742	0.960981	AT1G53645.1	hydroxyproline-rich glycoprotein family protein
30193877	1	Pavir.Da00062.1	0.1312	-1.0067	-0.04	-0.9667	0.511675	AT4G20930.1	6-phosphogluconate dehydrogenase family protein
30193903	8	Pavir.Da01465.1	0.4277	0.208	-0.04	0.248	1.18756	AT1G68850.1	Peroxidase superfamily protein
30193916	1	Pavir.Da01338.1	0.921	0.06881	-0.04	0.10881	1.07834	AT5G65460.1	kinesin like protein for actin based chloroplast movement 2
30193922	6	Pavir.Da01714.1	0.9784	-0.003733	-0.04	0.036267	1.02546	AT3G16240.1	delta tonoplast integral protein
30193926	1	Pavir.Da00489.1	0.7047	0.1631	-0.04	0.2031	1.15117	AT5G14880.1	Potassium transporter family protein
30193928	1	Pavir.Da00506.1	0.3282	0.2721	-0.04	0.3121	1.24151	AT2G33590.1	NAD(P)-binding Rossmann-fold superfamily protein
30193936	1	Pavir.Da00787.1	0.6028	0.217	-0.04	0.257	1.19499	AT1G14520.1	myo-inositol oxygenase 1
30193942	2	Pavir.Da02268.1	0.7155	-0.03529	-0.04	0.00471	1.00327	AT4G01560.1	Ribosomal RNA processing Brix domain protein
30193976	2	Pavir.Da02151.1	0.3944	0.3	-0.04	0.34	1.26576	AT5G25770.2	alpha/beta-Hydrolases superfamily protein
30193985	2	Pavir.Da01451.1	0.0659	1.1178	-0.04	1.1578	2.23117	AT2G17420.1	NADPH-dependent thioredoxin reductase A
30193987	2	Pavir.Da00020.1	0.5585	0.2405	-0.04	0.2805	1.21462	AT5G09250.1	ssDNA-binding transcriptional regulator
30194062	3	Pavir.Da00944.1	0.3152	-0.2417	-0.04	-0.2017	0.869525	AT1G30760.1	FAD-binding Berberine family protein
30194067	7	Pavir.Da00693.1	0.7162	-0.06617	-0.04	-0.02617	0.982024	AT2G34160.1	Alba DNA/RNA-binding protein
30194075	1	Pavir.Da00207.1	0.4625	-0.4827	-0.04	-0.4427	0.735756	AT2G30950.1	FtsH extracellular protease family
30194082	3	Pavir.Da01932.1	0.0618	-0.2422	-0.04	-0.2022	0.869224	AT2G36800.1	don-glucosyltransferase 1
30194088	5	Pavir.Da00434.1	0.0041	-0.5289	-0.04	-0.4889	0.712568	AT5G38530.1	tryptophan synthase beta type 2
30194112	1	Pavir.Da00058.1	0.5527	-0.4157	-0.04	-0.3757	0.770731	AT1G16670.1	Protein kinase superfamily protein
30194122	1	Pavir.Da01316.1	0.4435	-0.4947	-0.04	-0.4547	0.729662	AT4G08950.1	Phosphate-responsive 1 family protein
30194124	4	Pavir.Da01862.1	0.2426	0.2988	-0.04	0.3388	1.2647	AT2G46950.1	cytochrome P450, family 709, subfamily B, polypeptide 2
30194131	1	Pavir.Da01595.1	0.5411	0.1435	-0.04	0.1835	1.13564	AT5G10770.1	Eukaryotic aspartyl protease family protein
30194169	6	Pavir.Da02149.1	0.8141	-0.0437	-0.04	-0.0037	0.997439	AT3G61540.1	alpha/beta-Hydrolases superfamily protein
30194173	1	Pavir.Da00285.1	0.2592	0.2438	-0.04	0.2838	1.2174	AT2G44950.1	histone mono-ubiquitination 1
30194182	1	Pavir.Da00431.1	0.4401	-0.3091	-0.04	-0.2691	0.829837	AT1G61520.3	photosystem I light harvesting complex gene 3
30194187	1	Pavir.Da01479.1	0.9123	-0.03061	-0.04	0.00939	1.00653	AT1G14620.1	decoy
30194189	1	Pavir.Da00508.1	0.3735	-1.083	-0.04	-1.043	0.485317	AT2G35390.2	Phosphoribosyltransferase family protein
30194207	1	Pavir.Da02259.1	0.7168	-0.4879	-0.04	-0.4479	0.733109	AT2G17970.1	2-oxoglutarate (2OG) and Fe(II)-dependent oxygenase superfamily protein
30194209	2	Pavir.Da00935.1	0.0251	-1.3408	-0.04	-1.3008	0.405901	AT5G44390.1	FAD-binding Berberine family protein
30194213	1	Pavir.Da02165.1	0.9858	0.01347	-0.04	0.05347	1.03776	AT4G23850.1	AMP-dependent synthetase and ligase family protein
30194215	4	Pavir.Da00315.1	0.1608	-0.4344	-0.04	-0.3944	0.760806	AT1G31340.1	related to ubiquitin 1
30194231	1	Pavir.Da01625.1	0.6494	-0.4445	-0.04	-0.4045	0.755498	AT2G04550.1	indole-3-butyric acid response 5
30194254	1	Pavir.Da00726.1	0.5437	-0.2323	-0.04	-0.1923	0.875209	AT5G21105.1	Plant L-ascorbate oxidase
30194256	10	Pavir.Da01825.1	0.2208	-0.09234	-0.04	-0.05234	0.964371	AT1G01710.1	Acyl-CoA thioesterase family protein
30194262	1	Pavir.Da00655.1	0.2898	0.4327	-0.04	0.4727	1.3877	AT3G47780.1	ABC2 homolog 6
30194266	6	Pavir.Da00604.1	<.0001	-0.9513	-0.04	-0.9113	0.531706	AT1G06680.1	photosystem II subunit P-1
30194269	17	Pavir.Da01367.1	0.0167	-0.2693	-0.04	-0.2293	0.853049	AT3G02540.1	Rad23 UV excision repair protein family
30194276	96	Pavir.Da00120.1	<.0001	-0.7096	-0.04	-0.6696	0.628681	AT5G43060.1	Granulin repeat cysteine protease family protein
30194284	1	Pavir.Da01959.1	0.8694	-0.04114	-0.04	-0.00114	0.99921	AT5G12080.3	mechanosensitive channel of small conductance-like 10
30194289	1	Pavir.Da01887.1	0.7175	-0.1435	-0.04	-0.1035	0.930772	AT1G50920.1	Nucleolar GTP-binding protein
30194329	3	Pavir.Da00984.1	0.1673	-0.3014	-0.04	-0.2614	0.834278	AT1G06290.1	acyl-CoA oxidase 3
30194337	2	Pavir.Da02066.1	0.1205	-0.5436	-0.04	-0.5036	0.705345	AT4G36860.1	LIM domain-containing protein
30194355	3	Pavir.Da01770.1	0.386	-0.1165	-0.04	-0.0765	0.948356	AT5G53060.1	RNA-binding KH domain-containing protein
30194376	1	Pavir.Da01304.1	0.9269	0.04369	-0.04	0.08369	1.05973	AT5G59850.1	Ribosomal protein S8 family protein
30194379	1	Pavir.Da00656.1	0.263	0.09328	-0.04	0.13328	1.09678	AT4G37880.1	LisH/CRA/RING-U-box domains-containing protein
30194414	2	Pavir.Da00065.1	0.9673	0.01517	-0.04	0.05517	1.03898	AT1G30330.2	auxin response factor 6
30194417	2	Pavir.Da01851.1	0.4965	-0.2767	-0.04	-0.2367	0.848684	AT2G05940.1	Protein kinase superfamily protein
30194427	7	Pavir.Da01883.1	0.0021	-0.6116	-0.04	-0.5716	0.67287	AT5G20720.2	chaperonin 20
30194433	6	Pavir.Da02284.1	0.0748	-0.1979	-0.04	-0.1579	0.896329	AT2G45300.1	RNA 3\'-terminal phosphate cyclase/enolpyruvate transferase, alpha/beta
30194442	1	Pavir.Da02228.1	0.9192	-0.06094	-0.04	-0.02094	0.98559	AT5G39900.1	Small GTP-binding protein
30194470	3	Pavir.Da02432.1	0.294	-0.1482	-0.04	-0.1082	0.927745	AT4G25720.1	glutaminyl cyclase
30194478	1	Pavir.Da00449.1	0.6552	-0.3258	-0.04	-0.2858	0.820287	AT1G15690.1	Inorganic H pyrophosphatase family protein
30194481	4	Pavir.Da01173.1	0.0045	1.0117	-0.04	1.0517	2.07297	AT3G12760.1
30194516	1	Pavir.Da01317.1	0.9756	0.005584	-0.04	0.045584	1.0321	AT4G08960.1	phosphotyrosyl phosphatase activator (PTPA) family protein
30194539	1	Pavir.Da01365.1	0.5353	0.2393	-0.04	0.2793	1.21361	AT3G49100.1	Signal recognition particle, SRP9/SRP14 subunit
30194556	1	Pavir.Da00199.1	0.5234	0.2075	-0.04	0.2475	1.18715	AT1G53720.1	cyclophilin 59
30194563	1	Pavir.Da00481.1	0.0968	-0.3609	-0.04	-0.3209	0.80057	AT1G74350.1	Intron maturase, type II family protein
30194578	28	Pavir.Da00795.1	0.2617	0.10587	-0.04	0.14587	1.1064	AT1G03230.1	Eukaryotic aspartyl protease family protein
30194598	7	Pavir.Da01955.1	0.8106	-0.05096	-0.04	-0.01096	0.992432	AT3G13990.2	Kinase-related protein of unknown function (DUF1296)
30194610	1	Pavir.Da01179.1	0.5251	0.4862	-0.04	0.5262	1.44013	AT1G70230.1	TRICHOME BIREFRINGENCE-LIKE 27
30194633	3	Pavir.Da02395.1	0.8508	-0.0688	-0.04	-0.0288	0.980235	AT4G38800.1	methylthioadenosine nucleosidase 1
30194644	8	Pavir.Da01473.1	0.1359	-0.1534	-0.04	-0.1134	0.924407	AT3G13290.1	varicose-related
30194663	5	Pavir.Da01189.1	0.9649	0.01122	-0.04	0.05122	1.03614	AT1G10200.1	GATA type zinc finger transcription factor family protein
30194675	1	Pavir.Da00393.1	0.9831	0.01452	-0.04	0.05452	1.03851	AT3G22590.1	PLANT HOMOLOGOUS TO PARAFIBROMIN
30194688	3	Pavir.Da00791.1	0.0792	-0.4048	-0.04	-0.3648	0.776577	AT4G29260.1	HAD superfamily, subfamily IIIB acid phosphatase
30194692	1	Pavir.Da01876.1	0.1518	-1.1794	-0.04	-1.1394	0.453948	AT2G25080.1	glutathione peroxidase 1
30194706	9	Pavir.Da01230.1	0.127	-0.399	-0.04	-0.359	0.779705	AT1G18270.2	ketose-bisphosphate aldolase class-II family protein
30194715	2	Pavir.Da00205.1	0.5898	0.2019	-0.04	0.2419	1.18255	AT5G51430.1	conserved oligomeric Golgi complex component-related / COG complex component-related
30194734	3	Pavir.J11418.1	0.6642	-0.05046	-0.04	-0.01046	0.992776	AT2G47730.1	glutathione S-transferase phi 8
30194740	1	Pavir.J20133.1	0.362	0.1877	-0.04	0.2277	1.17097	AT4G38240.1	alpha-1,3-mannosyl-glycoprotein beta-1,2-N-acetylglucosaminyltransferase, putative
30194764	1	Pavir.J03770.1	0.2263	1.0611	-0.04	1.1011	2.14518	AT4G37300.1	maternal effect embryo arrest 59
30194791	4	Pavir.J25726.1	0.0123	0.7391	-0.04	0.7791	1.71606
30194810	1	Pavir.J28265.1	0.955	-0.04901	-0.04	-0.00901	0.993774	AT5G06470.1	Glutaredoxin family protein
30194828	7	Pavir.J05528.1	0.1508	0.1754	-0.04	0.2154	1.16103	AT1G15950.1	cinnamoyl coa reductase 1
30194880	1	Pavir.J35577.1	0.4413	-0.1885	-0.04	-0.1485	0.902188	AT5G54160.1	O-methyltransferase 1
30194891	6	Pavir.J29994.1	0.0087	-0.6974	-0.04	-0.6574	0.63402	AT1G15340.1	methyl-CPG-binding domain 10
30194920	5	Pavir.J38063.1	0.8625	-0.01712	-0.04	0.02288	1.01599	AT4G31990.2	aspartate aminotransferase 5
30194947	3	Pavir.J04941.1	0.5195	0.3069	-0.04	0.3469	1.27182	AT3G25800.1	protein phosphatase 2A subunit A2
30194971	1	Pavir.J12330.1	0.298	-0.8799	-0.04	-0.8399	0.558682	AT3G02100.1	UDP-Glycosyltransferase superfamily protein
30195005	2	Pavir.J04287.1	0.0985	-0.3469	-0.04	-0.3069	0.808377	AT5G03940.1	chloroplast signal recognition particle 54 kDa subunit
30195029	5	Pavir.J40724.1	0.3246	-0.3547	-0.04	-0.3147	0.804018	AT1G61870.1	pentatricopeptide repeat 336
30195084	3	Pavir.J13666.1	0.2467	-0.1267	-0.04	-0.0867	0.941674	AT3G53140.1	O-methyltransferase family protein
30195091	2	Pavir.J28031.1	0.5338	0.1793	-0.04	0.2193	1.16417	AT1G10310.1	NAD(P)-binding Rossmann-fold superfamily protein
30195159	5	Pavir.J16875.1	0.6484	-0.08897	-0.04	-0.04897	0.966626	AT1G80670.1	Transducin/WD40 repeat-like superfamily protein
30195162	3	Pavir.J10514.1	0.2518	0.1693	-0.04	0.2093	1.15613	AT1G48320.1	Thioesterase superfamily protein
30195229	1	Pavir.J16409.1	0.1031	-1.0864	-0.04	-1.0464	0.484175	AT4G25515.1	SEUSS-like 3
30195237	9	Pavir.J11142.1	0.0858	0.2382	-0.04	0.2782	1.21268	AT1G09640.1	Translation elongation factor EF1B, gamma chain
30195250	6	Pavir.J23818.1	0.0864	-0.341	-0.04	-0.301	0.81169	AT5G43940.2	GroES-like zinc-binding dehydrogenase family protein
30195305	2	Pavir.J31581.1	0.7434	0.05014	-0.04	0.09014	1.06447	AT4G30810.1	serine carboxypeptidase-like 29
30195340	6	Pavir.J12947.1	0.9048	-0.02002	-0.04	0.01998	1.01395	AT2G03200.1	Eukaryotic aspartyl protease family protein
30195347	6	Pavir.J00542.1	0.6896	0.07492	-0.04	0.11492	1.08291	AT1G09740.1	Adenine nucleotide alpha hydrolases-like superfamily protein
30195348	3	Pavir.J00540.1	0.2426	-0.1398	-0.04	-0.0998	0.933162	AT5G64350.1	FK506-binding protein 12
30195359	1	Pavir.J39768.1	0.4196	-0.2968	-0.04	-0.2568	0.836942	AT3G28720.1
30195360	6	Pavir.J13539.1	0.3589	0.09926	-0.04	0.13926	1.10134	AT1G14000.1	VH1-interacting kinase
30195394	2	Pavir.J39555.1	0.3282	0.347	-0.04	0.387	1.30767	AT3G59630.1	diphthamide synthesis DPH2 family protein
30195400	5	Pavir.J34168.1	0.214	0.214	-0.04	0.254	1.19251	AT1G07890.7	ascorbate peroxidase 1
30195433	6	Pavir.J11254.1	0.1214	0.1621	-0.04	0.2021	1.15037	AT1G14000.1	VH1-interacting kinase
30195435	1	Pavir.J21650.1	0.975	0.01713	-0.04	0.05713	1.04039
30195439	2	Pavir.J00406.1	0.5903	-0.1347	-0.04	-0.0947	0.936467	AT2G38870.1	Serine protease inhibitor, potato inhibitor I-type family protein
30195440	6	Pavir.J00408.1	0.0357	0.4271	-0.04	0.4671	1.38233	AT2G32720.1	cytochrome B5 isoform B
30195446	1	Pavir.J00407.1	0.9763	-0.0108	-0.04	0.0292	1.02045	AT2G38870.1	Serine protease inhibitor, potato inhibitor I-type family protein
30195468	2	Pavir.J32635.1	0.19	0.2333	-0.04	0.2733	1.20857	AT3G46060.1	RAB GTPase homolog 8A
30195475	10	Pavir.J35104.1	0.7051	0.05811	-0.04	0.09811	1.07037	AT4G14930.1	Survival protein SurE-like phosphatase/nucleotidase
30195492	2	Pavir.J36435.1	0.963	-0.007042	-0.04	0.032958	1.02311	AT3G06350.1	dehydroquinate dehydratase, putative / shikimate dehydrogenase, putative
30195549	3	Pavir.J01954.1	0.6675	-0.09739	-0.04	-0.05739	0.961001	AT3G06350.1	dehydroquinate dehydratase, putative / shikimate dehydrogenase, putative
30195555	2	Pavir.J10898.1	0.1024	-0.6727	-0.04	-0.6327	0.644968	AT3G47120.1	RNA recognition motif (RRM)-containing protein
30195580	1	Pavir.J12080.1	0.3681	0.105	-0.04	0.145	1.10573	AT2G15790.1	peptidyl-prolyl cis-trans isomerase / cyclophilin-40 (CYP40) / rotamase
30195603	2	Pavir.J03373.1	0.1061	0.5311	-0.04	0.5711	1.48566	AT1G03940.1	HXXXD-type acyl-transferase family protein
30195609	4	Pavir.J40761.1	0.7051	0.05441	-0.04	0.09441	1.06763	AT2G15490.1	UDP-glycosyltransferase 73B4
30195656	12	Pavir.J08935.1	0.0991	-0.14018	-0.04	-0.10018	0.932917	AT1G74050.1	Ribosomal protein L6 family protein
30195700	2	Pavir.J23425.1	0.6149	-0.3576	-0.04	-0.3176	0.802404	AT2G46140.1	Late embryogenesis abundant protein
30195713	4	Pavir.J01935.1	0.8741	-0.03431	-0.04	0.00569	1.00395	AT5G64160.1
30195741	9	Pavir.J39957.1	0.6271	-0.06448	-0.04	-0.02448	0.983175	AT2G32910.1	DCD (Development and Cell Death) domain protein
30195827	7	Pavir.J08816.1	0.423	-0.06508	-0.04	-0.02508	0.982766	AT5G40650.1	succinate dehydrogenase 2-2
30195835	2	Pavir.J33630.1	0.5753	0.1174	-0.04	0.1574	1.11528	AT3G57560.1	N-acetyl-l-glutamate kinase
30195838	1	Pavir.J10760.1	0.8316	-0.1909	-0.04	-0.1509	0.900688	AT5G16715.1	ATP binding;valine-tRNA ligases;aminoacyl-tRNA ligases;nucleotide binding;ATP binding;aminoacyl-tRNA ligases
30195872	6	Pavir.J35032.1	0.1526	0.3071	-0.04	0.3471	1.272	AT3G02760.1	Class II aaRS and biotin synthetases superfamily protein
30195873	16	Pavir.J35031.1	0.2262	0.11947	-0.04	0.15947	1.11688	AT3G12290.1	Amino acid dehydrogenase family protein
30195916	1	Pavir.J34947.1	0.6076	-0.4185	-0.04	-0.3785	0.769237	AT5G64570.1	beta-D-xylosidase 4
30195919	1	Pavir.J13751.1	0.9087	0.05413	-0.04	0.09413	1.06742	AT5G03230.1	Protein of unknown function, DUF584
30195994	4	Pavir.J37245.1	0.8128	0.08714	-0.04	0.12714	1.09213	AT4G14990.1	Topoisomerase II-associated protein PAT1
30195997	4	Pavir.J17952.1	0.7268	-0.04423	-0.04	-0.00423	0.997072	AT1G26880.1	Ribosomal protein L34e superfamily protein
30196019	1	Pavir.J11603.1	0.6908	-0.109	-0.04	-0.069	0.953299	AT5G10730.1	NAD(P)-binding Rossmann-fold superfamily protein
30196025	2	Pavir.J30694.1	0.4391	-0.1192	-0.04	-0.0792	0.946582	AT5G19740.1	Peptidase M28 family protein
30196035	1	Pavir.J39480.1	0.2962	0.6592	-0.04	0.6992	1.6236	AT3G20650.1	mRNA capping enzyme family protein
30196042	2	Pavir.J10693.1	0.5745	0.1942	-0.04	0.2342	1.17625
30196064	1	Pavir.J35466.1	0.8504	-0.06276	-0.04	-0.02276	0.984348	AT1G80360.1	Pyridoxal phosphate (PLP)-dependent transferases superfamily protein
30196067	4	Pavir.J08684.1	0.6028	-0.0843	-0.04	-0.0443	0.96976	AT1G62660.1	Glycosyl hydrolases family 32 protein
30196069	3	Pavir.J24955.1	0.173	0.2157	-0.04	0.2557	1.19391	AT1G63770.3	Peptidase M1 family protein
30196077	1	Pavir.J33027.1	0.3261	0.3291	-0.04	0.3691	1.29155	AT3G22330.1	putative mitochondrial RNA helicase 2
30196086	13	Pavir.J03529.1	0.5488	-0.09682	-0.04	-0.05682	0.961381	AT5G13520.1	peptidase M1 family protein
30196159	8	Pavir.J05284.1	0.0872	0.2463	-0.04	0.2863	1.21951	AT2G17840.1	Senescence/dehydration-associated protein-related
30196172	5	Pavir.J12163.1	0.5886	0.07692	-0.04	0.11692	1.08442	AT3G05000.1	Transport protein particle (TRAPP) component
30196258	3	Pavir.J18273.1	0.5698	-0.2473	-0.04	-0.2073	0.866157	AT5G15630.1	COBRA-like extracellular glycosyl-phosphatidyl inositol-anchored protein family
30196297	4	Pavir.J15933.1	0.0975	-0.2176	-0.04	-0.1776	0.884173	AT1G60690.1	NAD(P)-linked oxidoreductase superfamily protein
30196299	2	Pavir.J35351.1	0.5545	-0.2906	-0.04	-0.2506	0.840547	AT2G41790.1	Insulinase (Peptidase family M16) family protein
30196320	1	Pavir.J25900.1	0.0514	-0.5168	-0.04	-0.4768	0.71857	AT4G33420.1	Peroxidase superfamily protein
30196357	6	Pavir.J08726.1	0.7569	-0.04076	-0.04	-0.00076	0.999473	AT3G56630.1	cytochrome P450, family 94, subfamily D, polypeptide 2
30196409	1	Pavir.J09652.1	0.5652	0.4715	-0.04	0.5115	1.42553	AT1G28600.1	GDSL-like Lipase/Acylhydrolase superfamily protein
30196500	5	Pavir.J03393.1	0.508	-0.2089	-0.04	-0.1689	0.889521	AT5G42020.1	Heat shock protein 70 (Hsp 70) family protein
30196513	5	Pavir.J38773.1	0.6687	-0.1072	-0.04	-0.0672	0.954489	AT3G43190.1	sucrose synthase 4
30196532	4	Pavir.J20921.1	0.2602	0.1916	-0.04	0.2316	1.17414	AT5G26830.1	Threonyl-tRNA synthetase
30196544	3	Pavir.J11613.1	0.6874	-0.1138	-0.04	-0.0738	0.950132	AT5G60030.1
30196546	3	Pavir.J11612.1	0.6669	-0.1492	-0.04	-0.1092	0.927102	AT4G38280.1
30196562	6	Pavir.J03989.1	0.3885	-0.1929	-0.04	-0.1529	0.899441	AT1G15000.1	serine carboxypeptidase-like 50
30196602	1	Pavir.J15366.1	0.4552	-0.4121	-0.04	-0.3721	0.772657	AT3G27325.2	hydrolases, acting on ester bonds
30196609	2	Pavir.J10088.1	0.854	0.02361	-0.04	0.06361	1.04508	AT1G73940.1
30196616	3	Pavir.J04985.1	0.0561	-0.7722	-0.04	-0.7322	0.601985	AT3G23600.1	alpha/beta-Hydrolases superfamily protein
30196621	1	Pavir.J04987.1	0.7576	-0.08246	-0.04	-0.04246	0.970998	AT3G12500.1	basic chitinase
30196706	5	Pavir.J05300.1	0.0074	-0.28071	-0.04	-0.24071	0.846329	AT1G43170.5	ribosomal protein 1
30196754	1	Pavir.J02921.1	0.2146	-0.6513	-0.04	-0.6113	0.654607	AT3G52120.1	SWAP (Suppressor-of-White-APricot)/surp domain-containing protein / D111/G-patch domain-containing protein
30196781	47	Pavir.J00040.1	0.2501	-0.05484	-0.04	-0.01484	0.989766	AT2G29960.1	cyclophilin 5
30196786	1	Pavir.J00039.1	0.0545	0.5939	-0.04	0.6339	1.55175	AT4G39220.1	Rer1 family protein
30196794	1	Pavir.J00037.1	0.4384	0.5518	-0.04	0.5918	1.50713	AT3G02410.1	alpha/beta-Hydrolases superfamily protein
30196804	3	Pavir.J03140.1	0.4272	-0.3988	-0.04	-0.3588	0.779813	AT3G15180.1	ARM repeat superfamily protein
30196819	1	Pavir.J38509.1	0.084	-1.0284	-0.04	-0.9884	0.504036	AT1G12250.2	Pentapeptide repeat-containing protein
30196940	1	Pavir.J35582.1	0.9013	0.02756	-0.04	0.06756	1.04794	AT2G34500.1	cytochrome P450, family 710, subfamily A, polypeptide 1
30196943	84	Pavir.J00489.1	<.0001	0.47292	-0.04	0.51292	1.42694
30197013	3	Pavir.J28329.1	0.2351	0.3471	-0.04	0.3871	1.30776	AT5G16760.1	Inositol 1,3,4-trisphosphate 5/6-kinase family protein
30197054	3	Pavir.J33486.1	0.0533	-0.2491	-0.04	-0.2091	0.865077	AT3G13224.2	RNA-binding (RRM/RBD/RNP motifs) family protein
30197086	2	Pavir.J27939.1	0.1115	-0.1976	-0.04	-0.1576	0.896515	AT5G28050.2	Cytidine/deoxycytidylate deaminase family protein
30197087	11	Pavir.J27938.1	0.0555	0.2489	-0.04	0.2889	1.22171	AT5G28050.2	Cytidine/deoxycytidylate deaminase family protein
30197088	2	Pavir.J25785.1	0.9445	-0.02416	-0.04	0.01584	1.01104	AT3G62160.1	HXXXD-type acyl-transferase family protein
30197097	10	Pavir.J00225.1	0.0901	-0.1734	-0.04	-0.1334	0.91168	AT1G11910.1	aspartic proteinase A1
30197120	4	Pavir.J07169.1	0.806	-0.03253	-0.04	0.00747	1.00519	AT1G49600.1	RNA-binding protein 47A
30197153	1	Pavir.J28080.1	0.1671	0.524	-0.04	0.564	1.47836	AT5G05270.1	Chalcone-flavanone isomerase family protein
30197154	1	Pavir.J11933.1	0.0455	0.3949	-0.04	0.4349	1.35182	AT4G11220.1	VIRB2-interacting protein 2
30197174	3	Pavir.J25425.1	0.0131	1.0271	-0.04	1.0671	2.09522	AT2G32830.1	phosphate transporter 1;5
30197183	1	Pavir.J06459.1	0.3129	-1.0995	-0.04	-1.0595	0.479798
30197223	8	Pavir.J05437.1	0.1154	0.1667	-0.04	0.2067	1.15405	AT2G26230.1	uricase / urate oxidase / nodulin 35, putative
30197271	2	Pavir.J10805.1	0.6863	-0.1515	-0.04	-0.1115	0.925625	AT1G21326.1	VQ motif-containing protein
30197317	2	Pavir.J00078.1	0.1519	0.6255	-0.04	0.6655	1.58612	AT3G12490.2	cystatin B
30197318	1	Pavir.J00080.1	0.6797	-0.3699	-0.04	-0.3299	0.795592	AT2G40890.1	cytochrome P450, family 98, subfamily A, polypeptide 3
30197377	4	Pavir.J15560.1	0.0235	-0.3624	-0.04	-0.3224	0.799738	AT1G52340.1	NAD(P)-binding Rossmann-fold superfamily protein
30197386	8	Pavir.J37193.1	0.3939	-0.1558	-0.04	-0.1158	0.92287	AT3G22400.1	PLAT/LH2 domain-containing lipoxygenase family protein
30197418	2	Pavir.J09985.1	0.917	0.01057	-0.04	0.05057	1.03567	AT4G13340.1	Leucine-rich repeat (LRR) family protein
30197424	7	Pavir.J01238.1	0.3834	-0.2039	-0.04	-0.1639	0.892609	AT2G34480.1	Ribosomal protein L18ae/LX family protein
30197425	1	Pavir.J01235.1	0.3279	0.1946	-0.04	0.2346	1.17658	AT1G53580.1	glyoxalase II 3
30197427	2	Pavir.J01239.1	0.7772	-0.06796	-0.04	-0.02796	0.980806	AT2G38020.1	vacuoleless1 (VCL1)
30197449	10	Pavir.J06710.1	0.2947	0.1929	-0.04	0.2329	1.17519	AT2G33740.2	Nitrogen regulatory PII-like, alpha/beta
30197456	28	Pavir.J02194.1	0.4423	-0.08083	-0.04	-0.04083	0.972096	AT2G34480.1	Ribosomal protein L18ae/LX family protein
30197458	2	Pavir.J02192.1	0.3063	-0.169	-0.04	-0.129	0.914465	AT2G34470.2	urease accessory protein G
30197461	2	Pavir.J22922.1	0.5019	-0.5743	-0.04	-0.5343	0.690494	AT3G52880.1	monodehydroascorbate reductase 1
30197503	15	Pavir.J22292.1	0.5312	0.07838	-0.04	0.11838	1.08552	AT1G01420.1	UDP-glucosyl transferase 72B3
30197529	3	Pavir.J17204.1	0.2986	-0.2096	-0.04	-0.1696	0.889089	AT3G13790.1	Glycosyl hydrolases family 32 protein
30197544	1	Pavir.J32941.1	0.0168	-0.5053	-0.04	-0.4653	0.72432	AT2G28790.1	Pathogenesis-related thaumatin superfamily protein
30197560	5	Pavir.J07933.1	0.4557	0.09619	-0.04	0.13619	1.099	AT3G03190.1	glutathione S-transferase F11
30197585	2	Pavir.J38002.1	0.6927	0.122	-0.04	0.162	1.11884	AT3G12670.1	CTP synthase family protein
30197589	1	Pavir.J29760.1	0.822	-0.07921	-0.04	-0.03921	0.973188	AT1G14740.1	Protein of unknown function (DUF1423)
30197717	25	Pavir.J10622.1	0.0009	-0.25481	-0.04	-0.21481	0.86166	AT5G20720.3	chaperonin 20
30197752	7	Pavir.J27298.1	0.9592	-0.00485	-0.04	0.03515	1.02466	AT3G22430.1
30197780	4	Pavir.J03820.1	0.7452	-0.08316	-0.04	-0.04316	0.970527	AT3G59350.3	Protein kinase superfamily protein
30197828	1	Pavir.J15036.1	0.4996	0.4481	-0.04	0.4881	1.4026	AT3G03490.1	peroxin 19-1
30197853	2	Pavir.J24113.1	0.9372	-0.03846	-0.04	0.00154	1.00107	AT3G06350.1	dehydroquinate dehydratase, putative / shikimate dehydrogenase, putative
30197857	1	Pavir.J05850.1	0.3007	-0.6981	-0.04	-0.6581	0.633712	AT1G21460.1	Nodulin MtN3 family protein
30197866	2	Pavir.J13578.1	0.3354	0.2718	-0.04	0.3118	1.24126	AT1G62990.1	KNOTTED-like homeobox of Arabidopsis thaliana 7
30197878	1	Pavir.J34442.1	0.5444	-0.1831	-0.04	-0.1431	0.905571	AT5G53650.1
30197879	1	Pavir.J29745.1	0.9754	0.009942	-0.04	0.049942	1.03522
30197888	3	Pavir.J04715.1	0.709	-0.1932	-0.04	-0.1532	0.899254	AT4G37830.1	cytochrome c oxidase-related
30197892	3	Pavir.J39186.1	0.3922	-0.279	-0.04	-0.239	0.847332	AT3G23640.2	heteroglycan glucosidase 1
30197930	2	Pavir.J04781.1	0.0145	-0.4454	-0.04	-0.4054	0.755027	AT3G22800.1	Leucine-rich repeat (LRR) family protein
30197932	2	Pavir.J14200.1	0.2422	-0.1809	-0.04	-0.1409	0.906953	AT2G36320.1	A20/AN1-like zinc finger family protein
30197950	6	Pavir.J02169.1	0.3617	-0.1863	-0.04	-0.1463	0.903565	AT1G10390.1	Nucleoporin autopeptidase
30197962	2	Pavir.J23203.1	0.2865	-0.3484	-0.04	-0.3084	0.807537	AT4G16150.1	calmodulin binding;transcription regulators
30197978	1	Pavir.J07166.1	0.2068	-0.747	-0.04	-0.707	0.612593	AT5G47770.1	farnesyl diphosphate synthase 1
30197984	1	Pavir.J26917.1	0.7695	-0.07378	-0.04	-0.03378	0.976857	AT3G55090.1	ABC-2 type transporter family protein
30198003	2	Pavir.J03744.1	0.2146	-0.1741	-0.04	-0.1341	0.911238	AT5G64670.1	Ribosomal protein L18e/L15 superfamily protein
30198005	1	Pavir.J20054.1	0.9529	0.01475	-0.04	0.05475	1.03868	AT5G33280.1	Voltage-gated chloride channel family protein
30198033	4	Pavir.J03505.1	0.1561	-0.294	-0.04	-0.254	0.838568	AT1G65320.1	Cystathionine beta-synthase (CBS) family protein
30198034	3	Pavir.J03506.1	0.2909	0.3772	-0.04	0.4172	1.33533	AT2G43710.1	Plant stearoyl-acyl-carrier-protein desaturase family protein
30198036	5	Pavir.J06963.1	0.5026	0.1496	-0.04	0.1896	1.14045	AT1G66200.1	glutamine synthase clone F11
30198037	59	Pavir.J06962.1	0.0307	0.11595	-0.04	0.15595	1.11416	AT1G70730.3	Phosphoglucomutase/phosphomannomutase family protein
30198040	5	Pavir.J22143.1	0.9602	0.01128	-0.04	0.05128	1.03618	AT1G68560.1	alpha-xylosidase 1
30198054	1	Pavir.J05372.1	0.5245	-0.2002	-0.04	-0.1602	0.894901	AT1G79330.1	metacaspase 5
30198056	2	Pavir.J39960.1	0.936	-0.04184	-0.04	-0.00184	0.998725	AT1G28200.1	FH interacting protein 1
30198067	1	Pavir.J37318.1	0.1061	0.4505	-0.04	0.4905	1.40493	AT1G73460.1	Protein kinase superfamily protein
30198085	1	Pavir.J06288.1	0.1595	0.2369	-0.04	0.2769	1.21159	AT5G01650.2	Tautomerase/MIF superfamily protein
30198086	8	Pavir.J06288.2	0.1097	-0.2696	-0.04	-0.2296	0.852871	AT5G01650.1	Tautomerase/MIF superfamily protein
30198116	1	Pavir.J17249.1	0.7822	0.1088	-0.04	0.1488	1.10865	AT1G49950.1	telomere repeat binding factor 1
30198165	2	Pavir.J25894.1	0.2393	-0.6227	-0.04	-0.5827	0.667713	AT1G62790.2	Bifunctional inhibitor/lipid-transfer protein/seed storage 2S albumin superfamily protein
30198233	2	Pavir.J02511.1	0.569	0.1066	-0.04	0.1466	1.10696	AT3G26935.1	DHHC-type zinc finger family protein
30198286	1	Pavir.J06037.1	0.2706	-0.1916	-0.04	-0.1516	0.900251	AT1G60730.1	NAD(P)-linked oxidoreductase superfamily protein
30198317	1	Pavir.J23315.1	0.2099	-0.836	-0.04	-0.796	0.575944	AT3G62160.1	HXXXD-type acyl-transferase family protein
30198331	1	Pavir.J33954.1	0.81	0.1883	-0.04	0.2283	1.17145	AT5G08550.1	GC-rich sequence DNA-binding factor-like protein
30198334	1	Pavir.J09192.1	0.2623	-0.3442	-0.04	-0.3042	0.809891	AT3G07320.1	O-Glycosyl hydrolases family 17 protein
30198351	1	Pavir.J13747.1	0.9874	-0.01858	-0.04	0.02142	1.01496	AT2G07340.2	PREFOLDIN 1
30198369	2	Pavir.J15887.1	0.1876	0.243	-0.04	0.283	1.21672	AT3G06350.1	dehydroquinate dehydratase, putative / shikimate dehydrogenase, putative
30198401	1	Pavir.J21209.1	0.0463	-0.5605	-0.04	-0.5205	0.69713
30198439	12	Pavir.J09234.1	0.0013	0.3403	-0.04	0.3803	1.30161	AT4G35360.1	Uncharacterised conserved protein (UCP030210)
30198480	17	Pavir.J14815.1	0.9463	-0.01125	-0.04	0.02875	1.02013	AT3G10920.1	manganese superoxide dismutase 1
30198519	2	Pavir.J13370.1	0.9029	0.04554	-0.04	0.08554	1.06108	AT3G10030.1	aspartate/glutamate/uridylate kinase family protein
30198605	1	Pavir.J35670.1	0.5689	-0.3822	-0.04	-0.3422	0.788837	AT3G22630.1	20S proteasome beta subunit D1
30198660	4	Pavir.J04679.1	0.0058	0.4386	-0.04	0.4786	1.39339	AT1G12000.1	Phosphofructokinase family protein
30198661	3	Pavir.J04680.1	0.9594	0.01373	-0.04	0.05373	1.03795	AT1G59610.1	dynamin-like 3
30198667	1	Pavir.J07565.1	0.4068	-0.1318	-0.04	-0.0918	0.938351	AT1G27480.1	alpha/beta-Hydrolases superfamily protein
30198688	1	Pavir.J12420.1	0.6359	-0.3715	-0.04	-0.3315	0.79471	AT1G19250.1	flavin-dependent monooxygenase 1
30198706	2	Pavir.J10100.1	0.0889	0.3138	-0.04	0.3538	1.27792	AT4G09320.1	Nucleoside diphosphate kinase family protein
30198711	1	Pavir.J24158.1	0.118	-0.4863	-0.04	-0.4463	0.733923	AT5G10770.1	Eukaryotic aspartyl protease family protein
30198717	4	Pavir.J35627.1	0.0179	0.3798	-0.04	0.4198	1.33774	AT5G64460.6	Phosphoglycerate mutase family protein
30198729	2	Pavir.J02490.1	0.8983	0.03525	-0.04	0.07525	1.05354	AT5G61030.1	glycine-rich RNA-binding protein 3
30198772	10	Pavir.J08153.1	<.0001	0.7072	-0.04	0.7472	1.67853	AT1G80230.1	Rubredoxin-like superfamily protein
30198815	8	Pavir.J33669.1	0.7921	-0.03203	-0.04	0.00797	1.00554	AT1G12520.1	copper chaperone for SOD1
30198829	1	Pavir.J36187.1	0.5584	-0.419	-0.04	-0.379	0.76897
30198874	2	Pavir.J18024.1	0.4267	-0.1239	-0.04	-0.0839	0.943504	AT3G24200.2	FAD/NAD(P)-binding oxidoreductase family protein
30198920	3	Pavir.J23716.1	0.3764	0.1898	-0.04	0.2298	1.17267	AT4G38710.2	glycine-rich protein
30198964	3	Pavir.J38163.1	0.0703	-0.7527	-0.04	-0.7127	0.610177	AT5G56350.1	Pyruvate kinase family protein
30199003	8	Pavir.J31901.1	0.2509	0.0908	-0.04	0.1308	1.0949	AT3G59290.1	ENTH/VHS family protein
30199017	6	Pavir.J07067.1	0.9972	-0.0005918	-0.04	0.0394082	1.02769	AT4G11290.1	Peroxidase superfamily protein
30199018	3	Pavir.J15472.1	0.9548	-0.02253	-0.04	0.01747	1.01218	AT1G07810.1	ER-type Ca2+-ATPase 1
30199049	11	Pavir.J15849.1	0.551	0.1013	-0.04	0.1413	1.1029	AT4G15530.5	pyruvate orthophosphate dikinase
30199136	9	Pavir.J06411.1	0.2967	0.1207	-0.04	0.1607	1.11783	AT5G17310.2	UDP-glucose pyrophosphorylase 2
30199148	7	Pavir.J10043.1	0.1239	0.15627	-0.04	0.19627	1.14573	AT5G10860.1	Cystathionine beta-synthase (CBS) family protein
30199184	2	Pavir.J18496.1	0.0726	0.488	-0.04	0.528	1.44193	AT1G27390.1	translocase outer membrane 20-2
30199232	1	Pavir.J05596.1	0.668	-0.1142	-0.04	-0.0742	0.949869	AT1G54100.1	aldehyde dehydrogenase 7B4
30199251	5	Pavir.J01480.1	0.4034	-0.1972	-0.04	-0.1572	0.896764	AT1G56340.2	calreticulin 1a
30199257	2	Pavir.J08766.1	0.498	-0.2675	-0.04	-0.2275	0.854114	AT5G03905.1	Iron-sulphur cluster biosynthesis family protein
30199259	1	Pavir.J32470.1	0.6779	0.1803	-0.04	0.2203	1.16498	AT2G16460.1	Protein of unknown function (DUF1640)
30199271	13	Pavir.J01649.1	0.4842	-0.04936	-0.04	-0.00936	0.993533	AT5G42740.1	Sugar isomerase (SIS) family protein
30199280	1	Pavir.J18244.1	0.8685	-0.05255	-0.04	-0.01255	0.991339	AT3G52850.1	vacuolar sorting receptor homolog 1
30199303	2	Pavir.J08176.1	0.5173	-0.352	-0.04	-0.312	0.805524	AT5G14600.1	S-adenosyl-L-methionine-dependent methyltransferases superfamily protein
30199322	1	Pavir.J15003.1	0.5563	-0.4086	-0.04	-0.3686	0.774534	AT1G55170.1
30199387	5	Pavir.J33073.1	0.8155	0.02679	-0.04	0.06679	1.04738	AT1G30580.1	GTP binding
30199419	4	Pavir.J32834.1	0.8264	-0.05231	-0.04	-0.01231	0.991504
30199430	3	Pavir.J07679.1	0.8859	0.03005	-0.04	0.07005	1.04975	AT5G22300.1	nitrilase 4
30199435	2	Pavir.J11963.1	0.2746	0.2474	-0.04	0.2874	1.22044	AT4G32720.1	La protein 1
30199464	2	Pavir.J15023.1	0.0599	0.5224	-0.04	0.5624	1.47672	AT5G57120.1
30199475	2	Pavir.J07799.1	0.6592	-0.1258	-0.04	-0.0858	0.942262	AT3G23640.2	heteroglycan glucosidase 1
30199481	9	Pavir.J01342.1	0.066	-0.3378	-0.04	-0.2978	0.813492	AT2G27730.1	copper ion binding
30199544	5	Pavir.J08147.1	0.4606	-0.1541	-0.04	-0.1141	0.923959	AT5G10770.1	Eukaryotic aspartyl protease family protein
30199551	31	Pavir.J05185.1	0.0185	-0.17734	-0.04	-0.13734	0.909194	AT3G48730.1	glutamate-1-semialdehyde 2,1-aminomutase 2
30199570	1	Pavir.J02955.1	0.2482	-0.9291	-0.04	-0.8891	0.539951	AT1G22540.1	Major facilitator superfamily protein
30199571	6	Pavir.J02952.1	0.3945	-0.1203	-0.04	-0.0803	0.945861	AT2G16570.1	GLN phosphoribosyl pyrophosphate amidotransferase 1
30199604	1	Pavir.J36137.1	0.6674	0.2384	-0.04	0.2784	1.21285	AT2G29540.2	RNApolymerase 14 kDa subunit
30199614	3	Pavir.J37823.1	0.2003	-0.4455	-0.04	-0.4055	0.754975	AT5G56030.1	heat shock protein 81-2
30199633	1	Pavir.J05061.1	0.31	-0.1428	-0.04	-0.1028	0.931224	AT4G35770.1	Rhodanese/Cell cycle control phosphatase superfamily protein
30199634	2	Pavir.J05059.1	0.0111	-1.1143	-0.04	-1.0743	0.474901	AT4G35770.1	Rhodanese/Cell cycle control phosphatase superfamily protein
30199643	1	Pavir.J27195.1	0.1664	0.3216	-0.04	0.3616	1.28485	AT5G60920.1	COBRA-like extracellular glycosyl-phosphatidyl inositol-anchored protein family
30199652	1	Pavir.J07613.1	0.1172	0.3637	-0.04	0.4037	1.3229	AT1G09750.1	Eukaryotic aspartyl protease family protein
30199656	2	Pavir.J07854.1	0.3857	-0.2697	-0.04	-0.2297	0.852812	AT3G33530.2	Transducin family protein / WD-40 repeat family protein
30199700	36	Pavir.J38901.1	0.2038	0.08685	-0.04	0.12685	1.09191	AT4G13930.1	serine hydroxymethyltransferase 4
30199729	2	Pavir.J31027.1	0.8388	-0.04977	-0.04	-0.00977	0.993251	AT3G18180.1	Glycosyltransferase family 61 protein
30199746	2	Pavir.J32353.1	0.8562	0.07855	-0.04	0.11855	1.08564
30199801	1	Pavir.J11864.1	0.2819	-0.5583	-0.04	-0.5183	0.698194	AT4G31820.1	Phototropic-responsive NPH3 family protein
30199824	2	Pavir.J34085.1	0.2071	-0.428	-0.04	-0.388	0.764188	AT3G56850.1	ABA-responsive element binding protein 3
30199844	1	Pavir.J36855.1	0.1608	-1.0585	-0.04	-1.0185	0.493629	AT1G52820.1	2-oxoglutarate (2OG) and Fe(II)-dependent oxygenase superfamily protein
30199851	13	Pavir.J02787.1	0.0015	-0.4443	-0.04	-0.4043	0.755603	AT1G11910.1	aspartic proteinase A1
30199901	10	Pavir.J25352.1	0.2932	-0.1859	-0.04	-0.1459	0.903815	AT5G43940.1	GroES-like zinc-binding dehydrogenase family protein
30199914	7	Pavir.J02461.1	0.4369	-0.1025	-0.04	-0.0625	0.957603	AT4G16580.1	Protein phosphatase 2C family protein
30199971	2	Pavir.J25533.1	0.526	0.2247	-0.04	0.2647	1.20139	AT1G01300.1	Eukaryotic aspartyl protease family protein
30199977	1	Pavir.J13545.1	0.4457	0.3315	-0.04	0.3715	1.2937	AT2G17420.1	NADPH-dependent thioredoxin reductase A
30199985	9	Pavir.J18635.1	0.8803	-0.02417	-0.04	0.01583	1.01103	AT3G12110.1	actin-11
30199992	3	Pavir.J37944.1	0.6227	0.1392	-0.04	0.1792	1.13226	AT5G55670.1	RNA-binding (RRM/RBD/RNP motifs) family protein
30200038	2	Pavir.J33323.1	0.9805	0.005863	-0.04	0.045863	1.0323	AT5G45920.1	SGNH hydrolase-type esterase superfamily protein
30200042	2	Pavir.J02231.1	0.0263	-0.7143	-0.04	-0.6743	0.626636	AT4G12080.1	AT-hook motif nuclear-localized protein 1
30200044	2	Pavir.J08653.1	0.7388	-0.1232	-0.04	-0.0832	0.943962	AT1G79690.1	nudix hydrolase homolog 3
30200052	13	Pavir.J02817.1	0.004	-0.3667	-0.04	-0.3267	0.797358	AT2G02500.1	Nucleotide-diphospho-sugar transferases superfamily protein
30200099	1	Pavir.J22197.1	0.5647	-0.5299	-0.04	-0.4899	0.712074	AT5G17270.1	Protein prenylyltransferase superfamily protein
30200154	4	Pavir.J33091.1	0.0246	-0.7974	-0.04	-0.7574	0.591561	AT5G06060.1	NAD(P)-binding Rossmann-fold superfamily protein
30200160	1	Pavir.J15286.1	0.7625	0.06521	-0.04	0.10521	1.07565	AT4G01690.2	Flavin containing amine oxidoreductase family
30200186	3	Pavir.J03489.1	0.7612	-0.1461	-0.04	-0.1061	0.929096	AT5G27540.1	MIRO-related GTP-ase 1
30200210	1	Pavir.J27614.1	0.3025	0.6286	-0.04	0.6686	1.58953	AT1G52820.1	2-oxoglutarate (2OG) and Fe(II)-dependent oxygenase superfamily protein
30200218	1	Pavir.J02726.1	0.1263	0.3859	-0.04	0.4259	1.34341	AT1G25350.1	glutamine-tRNA ligase, putative / glutaminyl-tRNA synthetase, putative / GlnRS, putative
30200230	2	Pavir.J35166.1	0.2183	-0.2504	-0.04	-0.2104	0.864298	AT1G11390.1	Protein kinase superfamily protein
30200269	1	Pavir.J38826.1	0.7652	-0.09893	-0.04	-0.05893	0.959976
30200276	2	Pavir.J14835.1	0.0733	0.806	-0.04	0.846	1.79751	AT5G58860.1	cytochrome P450, family 86, subfamily A, polypeptide 1
30200279	1	Pavir.J35913.1	0.7409	-0.05314	-0.04	-0.01314	0.990933	AT2G45550.1	cytochrome P450, family 76, subfamily C, polypeptide 4
30200307	3	Pavir.J00204.1	0.2092	0.2957	-0.04	0.3357	1.26199	AT4G19880.1	Glutathione S-transferase family protein
30200353	21	Pavir.J34464.2	0.0261	-0.1726	-0.04	-0.1326	0.912186	AT3G53580.1	diaminopimelate epimerase family protein
30200417	6	Pavir.J15872.1	0.0032	0.6208	-0.04	0.6608	1.58096	AT2G40320.1	TRICHOME BIREFRINGENCE-LIKE 33
30200438	2	Pavir.J08288.1	0.4458	0.1897	-0.04	0.2297	1.17259	AT2G38970.1	Zinc finger (C3HC4-type RING finger) family protein
30200466	3	Pavir.J16593.1	0.6504	0.1532	-0.04	0.1932	1.1433	AT1G22870.1	Protein kinase family protein with ARM repeat domain
30200510	5	Pavir.J02362.1	0.5956	-0.1061	-0.04	-0.0661	0.955217	AT5G17770.1	NADH:cytochrome B5 reductase 1
30200520	1	Pavir.J29924.1	0.1767	-0.6922	-0.04	-0.6522	0.636309	AT3G46920.1	Protein kinase superfamily protein with octicosapeptide/Phox/Bem1p domain
30200568	2	Pavir.J15145.1	0.9213	0.0301	-0.04	0.0701	1.04979	AT2G20280.1	Zinc finger C-x8-C-x5-C-x3-H type family protein
30200573	8	Pavir.J14614.1	0.0335	-0.18792	-0.04	-0.14792	0.902551	AT2G40600.1	appr-1-p processing enzyme family protein
30200586	1	Pavir.J06115.1	0.1304	-1.112	-0.04	-1.072	0.475659	AT3G51590.1	lipid transfer protein 12
30200591	2	Pavir.J06748.1	0.3861	0.1798	-0.04	0.2198	1.16457	AT3G62160.1	HXXXD-type acyl-transferase family protein
30200595	1	Pavir.J25448.1	0.6219	0.1152	-0.04	0.1552	1.11358	AT1G64110.3	P-loop containing nucleoside triphosphate hydrolases superfamily protein
30200683	1	Pavir.J07411.1	0.8076	0.2616	-0.04	0.3016	1.23251	AT5G58100.1
30200700	3	Pavir.J00630.1	0.3801	0.2947	-0.04	0.3347	1.26112	AT1G01910.2	P-loop containing nucleoside triphosphate hydrolases superfamily protein
30200706	10	Pavir.J00631.1	0.4607	0.104	-0.04	0.144	1.10496	AT4G11820.2	hydroxymethylglutaryl-CoA synthase / HMG-CoA synthase / 3-hydroxy-3-methylglutaryl coenzyme A synthase
30200752	1	Pavir.J40541.1	0.4748	-0.4877	-0.04	-0.4477	0.733211	AT1G33980.2	Smg-4/UPF3 family protein
30200781	2	Pavir.J17065.1	0.2726	-0.2034	-0.04	-0.1634	0.892918	AT1G52570.1	phospholipase D alpha 2
30200794	4	Pavir.J35303.1	0.9076	-0.04187	-0.04	-0.00187	0.998705	AT1G60420.1	DC1 domain-containing protein
30200822	3	Pavir.J39541.1	0.6054	-0.09601	-0.04	-0.05601	0.961921	AT3G13060.2	evolutionarily conserved C-terminal region 5
30200869	1	Pavir.J00960.1	0.5916	0.2875	-0.04	0.3275	1.25484	AT5G16280.1	Tetratricopeptide repeat (TPR)-like superfamily protein
30200870	3	Pavir.J00961.1	0.1917	-0.3232	-0.04	-0.2832	0.821766	AT3G11820.1	syntaxin of plants 121
30200876	10	Pavir.J41079.1	0.0025	0.5606	-0.04	0.6006	1.51635	AT1G18640.2	3-phosphoserine phosphatase
30200890	1	Pavir.J33769.1	0.6303	-0.1639	-0.04	-0.1239	0.917703	AT1G33500.1
30200893	1	Pavir.J03123.1	0.4892	-0.2643	-0.04	-0.2243	0.85601	AT3G42790.1	alfin-like 3
30200965	1	Pavir.J03454.1	0.6984	-0.1432	-0.04	-0.1032	0.930966	AT3G45300.1	isovaleryl-CoA-dehydrogenase
30200995	9	Pavir.J35927.1	0.5327	-0.08132	-0.04	-0.04132	0.971765	AT5G50960.1	nucleotide binding protein 35
30201037	2	Pavir.J31110.1	0.1302	0.3633	-0.04	0.4033	1.32253
30201050	5	Pavir.J22118.1	0.3073	-0.1748	-0.04	-0.1348	0.910796
30201079	15	Pavir.J10420.1	0.1253	-0.1731	-0.04	-0.1331	0.91187	AT5G07990.1	Cytochrome P450 superfamily protein
30201085	1	Pavir.J14855.1	0.395	-0.3714	-0.04	-0.3314	0.794765	AT2G19130.1	S-locus lectin protein kinase family protein
30201110	3	Pavir.J16550.1	0.1679	-0.2035	-0.04	-0.1635	0.892856	AT5G09300.1	Thiamin diphosphate-binding fold (THDP-binding) superfamily protein
30201144	1	Pavir.J26690.1	0.1451	-0.3769	-0.04	-0.3369	0.791741	AT5G42740.1	Sugar isomerase (SIS) family protein
30201145	1	Pavir.J26690.2	0.8854	-0.03848	-0.04	0.00152	1.00105	AT5G42740.1	Sugar isomerase (SIS) family protein
30201148	2	Pavir.J34286.1	0.5584	-0.2828	-0.04	-0.2428	0.845104	AT1G55120.1	beta-fructofuranosidase 5
30201207	16	Pavir.J00438.1	0.4378	0.1263	-0.04	0.1663	1.12218	AT3G53990.1	Adenine nucleotide alpha hydrolases-like superfamily protein
30201239	4	Pavir.J23435.1	0.7738	0.09259	-0.04	0.13259	1.09626	AT1G24050.1	RNA-processing, Lsm domain
30201245	1	Pavir.J07969.1	0.6256	-0.07384	-0.04	-0.03384	0.976817	AT5G60540.1	pyridoxine biosynthesis 2
30201260	1	Pavir.J15766.1	0.727	-0.07922	-0.04	-0.03922	0.973181	AT4G36760.1	aminopeptidase P1
30201275	1	Pavir.J29045.1	0.7288	-0.1946	-0.04	-0.1546	0.898381	AT3G46730.1	NB-ARC domain-containing disease resistance protein
30201295	2	Pavir.J34975.1	0.2246	0.1423	-0.04	0.1823	1.13469	AT2G15690.1	Tetratricopeptide repeat (TPR)-like superfamily protein
30201300	1	Pavir.J30616.1	0.5996	-0.4012	-0.04	-0.3612	0.778517	AT4G36810.1	geranylgeranyl pyrophosphate synthase 1
30201410	5	Pavir.J15688.1	0.424	-0.1558	-0.04	-0.1158	0.92287	AT4G23180.1	cysteine-rich RLK (RECEPTOR-like protein kinase) 10
30201441	2	Pavir.J07712.1	0.0211	-0.9084	-0.04	-0.8684	0.547754	AT1G51560.1	Pyridoxamine 5\'-phosphate oxidase family protein
30201483	2	Pavir.J32364.1	0.6144	0.1434	-0.04	0.1834	1.13556	AT3G22760.1	Tesmin/TSO1-like CXC domain-containing protein
30201513	2	Pavir.J24458.1	0.9542	0.03027	-0.04	0.07027	1.04991	AT1G20670.1	DNA-binding bromodomain-containing protein
30201516	3	Pavir.J12432.1	0.1059	0.2911	-0.04	0.3311	1.25797	AT3G62760.1	Glutathione S-transferase family protein
30201535	8	Pavir.J15309.1	0.3348	-0.1577	-0.04	-0.1177	0.921656	AT3G07100.1	Sec23/Sec24 protein transport family protein
30201545	1	Pavir.J37439.1	0.6454	0.162	-0.04	0.202	1.15029	AT1G06200.1	Peptidase S24/S26A/S26B/S26C family protein
30201549	1	Pavir.J06356.1	0.8932	0.1225	-0.04	0.1625	1.11922	AT1G49340.1	Phosphatidylinositol 3- and 4-kinase family protein
30201551	3	Pavir.J02196.1	0.1113	0.4106	-0.04	0.4506	1.36661	AT5G15610.2	Proteasome component (PCI) domain protein
30201592	1	Pavir.J20283.1	0.9161	-0.06248	-0.04	-0.02248	0.984539	AT2G26610.1	Transducin family protein / WD-40 repeat family protein
30201671	1	Pavir.J12927.1	0.6426	0.05781	-0.04	0.09781	1.07015	AT1G25375.1	Metallo-hydrolase/oxidoreductase superfamily protein
30201738	3	Pavir.J40862.1	0.0541	0.4506	-0.04	0.4906	1.40503	AT4G10260.1	pfkB-like carbohydrate kinase family protein
30201743	5	Pavir.J16882.1	0.1049	-0.3357	-0.04	-0.2957	0.814677	AT1G31670.1	Copper amine oxidase family protein
30201766	2	Pavir.J16778.1	0.5867	0.1644	-0.04	0.2044	1.15221	AT1G27210.1	ARM repeat superfamily protein
30201769	2	Pavir.J07289.1	0.0185	0.8716	-0.04	0.9116	1.88113	AT1G67940.1	non-intrinsic ABC protein 3
30201826	1	Pavir.J24099.1	0.9383	0.08132	-0.04	0.12132	1.08773	AT5G10530.1	Concanavalin A-like lectin protein kinase family protein
30201847	1	Pavir.J40106.1	0.275	-0.6524	-0.04	-0.6124	0.654108	AT5G58320.2	Kinase interacting (KIP1-like) family protein
30201869	1	Pavir.J16569.1	0.3185	0.8537	-0.04	0.8937	1.85793	AT5G62390.1	BCL-2-associated athanogene 7
30201992	1	Pavir.J01115.1	0.682	-0.09743	-0.04	-0.05743	0.960974	AT5G14105.1
30201993	7	Pavir.J01113.1	0.7484	-0.06567	-0.04	-0.02567	0.982364	AT1G78660.2	gamma-glutamyl hydrolase 1
30201996	2	Pavir.J01114.2	0.7264	-0.09247	-0.04	-0.05247	0.964284	AT2G16060.1	hemoglobin 1
30202000	3	Pavir.J01116.1	0.5472	0.1039	-0.04	0.1439	1.10489	AT4G18930.1	RNA ligase/cyclic nucleotide phosphodiesterase family protein
30202009	1	Pavir.J22749.2	0.7556	0.05295	-0.04	0.09295	1.06655	AT3G06860.1	multifunctional protein 2
30202015	13	Pavir.J20629.1	0.8893	0.01664	-0.04	0.05664	1.04004	AT4G24680.1	modifier of snc1
30202065	2	Pavir.J00424.1	0.2212	-0.3081	-0.04	-0.2681	0.830412	AT3G11780.1	MD-2-related lipid recognition domain-containing protein / ML domain-containing protein
30202066	7	Pavir.J00423.1	0.2994	-0.1765	-0.04	-0.1365	0.909723	AT3G10650.1
30202068	9	Pavir.J18067.1	0.4304	-0.07419	-0.04	-0.03419	0.97658	AT2G44120.2	Ribosomal protein L30/L7 family protein
30202083	4	Pavir.J00981.1	0.0902	-0.4943	-0.04	-0.4543	0.729864	AT2G24200.2	Cytosol aminopeptidase family protein
30202169	4	Pavir.J06597.1	0.712	-0.1079	-0.04	-0.0679	0.954026	AT5G67230.1	Nucleotide-diphospho-sugar transferases superfamily protein
30202226	1	Pavir.J00978.1	0.4428	-0.2622	-0.04	-0.2222	0.857257	AT5G53950.1	NAC (No Apical Meristem) domain transcriptional regulator superfamily protein
30202228	1	Pavir.J24487.1	0.6601	0.1152	-0.04	0.1552	1.11358
30202238	1	Pavir.J30897.1	0.0348	-0.7273	-0.04	-0.6873	0.621015	AT1G71350.1	eukaryotic translation initiation factor SUI1 family protein
30202275	1	Pavir.J31789.1	0.7977	-0.04389	-0.04	-0.00389	0.997307	AT1G77590.1	long chain acyl-CoA synthetase 9
30202291	5	Pavir.J03797.1	0.1285	-0.4294	-0.04	-0.3894	0.763447	AT1G60070.1	Adaptor protein complex AP-1, gamma subunit
30202310	19	Pavir.J07876.1	0.8878	0.01274	-0.04	0.05274	1.03723	AT2G19770.1	profilin 5
30202356	1	Pavir.J39817.1	0.837	0.186	-0.04	0.226	1.16959	AT5G20890.1	TCP-1/cpn60 chaperonin family protein
30202364	4	Pavir.J02203.1	0.3244	0.1848	-0.04	0.2248	1.16862	AT4G21700.1	Protein of unknown function (DUF2921)
30202376	1	Pavir.J24083.1	0.4082	0.2773	-0.04	0.3173	1.246	AT4G37970.1	cinnamyl alcohol dehydrogenase 6
30202380	2	Pavir.J21355.1	0.1112	0.388	-0.04	0.428	1.34537	AT5G27740.1	ATPase family associated with various cellular activities (AAA)
30202397	1	Pavir.J12372.1	0.7539	0.1993	-0.04	0.2393	1.18042	AT1G15520.1	pleiotropic drug resistance 12
30202457	9	Pavir.J15412.1	0.363	0.09231	-0.04	0.13231	1.09605	AT2G42710.1	Ribosomal protein L1p/L10e family
30202465	3	Pavir.J18463.1	0.9473	-0.01197	-0.04	0.02803	1.01962	AT4G34480.1	O-Glycosyl hydrolases family 17 protein
30202468	9	Pavir.J40142.1	0.5029	0.1275	-0.04	0.1675	1.12311	AT2G15480.2	UDP-glucosyl transferase 73B5
30202491	16	Pavir.J15815.1	0.0095	-0.22465	-0.04	-0.18465	0.879863	AT1G65870.1	Disease resistance-responsive (dirigent-like protein) family protein
30202499	4	Pavir.J14313.1	0.6296	-0.1844	-0.04	-0.1444	0.904756	AT1G55120.1	beta-fructofuranosidase 5
30202524	6	Pavir.J13901.1	0.519	-0.1242	-0.04	-0.0842	0.943307	AT3G25780.1	allene oxide cyclase 3
30202547	3	Pavir.J03993.1	0.5326	0.1044	-0.04	0.1444	1.10527	AT2G20510.1	translocase inner membrane subunit 44-1
30202564	6	Pavir.J16503.1	0.0423	0.3969	-0.04	0.4369	1.35369	AT3G46560.1	Tim10/DDP family zinc finger protein
30202584	7	Pavir.J30762.1	0.0006	0.696	-0.04	0.736	1.66555	AT1G15710.1	prephenate dehydrogenase family protein
30202599	2	Pavir.J32949.1	0.6628	-0.07864	-0.04	-0.03864	0.973572	AT5G20070.1	nudix hydrolase homolog 19
30202600	1	Pavir.J26919.1	0.0359	-0.5687	-0.04	-0.5287	0.693179	AT5G22040.2
30202606	1	Pavir.J11557.1	0.5519	-0.4426	-0.04	-0.4026	0.756494	AT4G08950.1	Phosphate-responsive 1 family protein
30202609	2	Pavir.J03116.1	0.3683	-0.2162	-0.04	-0.1762	0.885031	AT5G58300.1	Leucine-rich repeat protein kinase family protein
30202610	6	Pavir.J03117.1	0.8537	-0.03587	-0.04	0.00413	1.00287	AT3G08670.1
30202619	1	Pavir.J35095.1	0.4054	0.8527	-0.04	0.8927	1.85665	AT3G03210.1
30202651	4	Pavir.J33948.1	0.2842	0.1907	-0.04	0.2307	1.1734	AT3G14180.1	sequence-specific DNA binding transcription factors
30202660	2	Pavir.J23345.1	0.0009	-0.6603	-0.04	-0.6203	0.650536	AT3G23570.1	alpha/beta-Hydrolases superfamily protein
30202688	2	Pavir.J02821.1	0.2185	-0.4989	-0.04	-0.4589	0.727541	AT2G20850.1	STRUBBELIG-receptor family 1
30202739	2	Pavir.J00069.1	0.0635	0.5973	-0.04	0.6373	1.55542
30202789	4	Pavir.J35014.1	0.5895	-0.09464	-0.04	-0.05464	0.962835	AT3G51160.1	NAD(P)-binding Rossmann-fold superfamily protein
30202806	1	Pavir.J06852.1	0.3533	-0.1528	-0.04	-0.1128	0.924791	AT1G75280.1	NmrA-like negative transcriptional regulator family protein
30202813	1	Pavir.J35722.1	0.1947	-0.5654	-0.04	-0.5254	0.694766	AT5G15140.1	Galactose mutarotase-like superfamily protein
30202831	2	Pavir.J13505.1	0.7283	0.07402	-0.04	0.11402	1.08224	AT1G27970.1	nuclear transport factor 2B
30202843	1	Pavir.J19683.1	0.8742	0.1306	-0.04	0.1706	1.12553	AT1G12930.1	ARM repeat superfamily protein
30202850	1	Pavir.J05961.1	0.4984	-0.1711	-0.04	-0.1311	0.913135	AT1G70500.1	Pectin lyase-like superfamily protein
30202897	2	Pavir.J02780.1	0.5996	0.1481	-0.04	0.1881	1.13926	AT2G39980.1	HXXXD-type acyl-transferase family protein
30202919	2	Pavir.J00246.1	0.1527	0.5553	-0.04	0.5953	1.51079	AT1G29370.1	Kinase-related protein of unknown function (DUF1296)
30202936	1	Pavir.J15334.1	0.4098	-0.8029	-0.04	-0.7629	0.589311	AT1G80030.1	Molecular chaperone Hsp40/DnaJ family protein
30202961	1	Pavir.J05403.1	0.2561	-0.3075	-0.04	-0.2675	0.830758	AT1G23270.1
30202995	1	Pavir.J07412.1	0.1364	-1.107	-0.04	-1.067	0.477311	AT2G20370.1	Exostosin family protein
30203021	2	Pavir.J40072.1	0.4236	-0.3454	-0.04	-0.3054	0.809218	AT3G20550.1	SMAD/FHA domain-containing protein
30203023	1	Pavir.J37959.1	0.1622	-0.2295	-0.04	-0.1895	0.87691	AT3G13224.2	RNA-binding (RRM/RBD/RNP motifs) family protein
30203057	3	Pavir.J37190.1	0.591	-0.1813	-0.04	-0.1413	0.906702	AT3G62030.2	rotamase CYP 4
30203089	3	Pavir.Ca00243.1	0.5023	-0.2407	-0.04	-0.2007	0.870128	AT1G77490.1	thylakoidal ascorbate peroxidase
30203129	2	Pavir.Ca01390.1	0.4836	-0.1713	-0.04	-0.1313	0.913008	AT4G11060.1	mitochondrially targeted single-stranded DNA binding protein
30203140	2	Pavir.Ca00664.1	0.7418	-0.04158	-0.04	-0.00158	0.998905	AT3G55260.1	beta-hexosaminidase 1
30203147	10	Pavir.Ca02396.1	0.1545	0.14325	-0.04	0.18325	1.13544	AT3G04600.1	Nucleotidylyl transferase superfamily protein
30203153	1	Pavir.Ca00134.1	0.3015	-0.3215	-0.04	-0.2815	0.822735	AT1G08280.1	Glycosyltransferase family 29 (sialyltransferase) family protein
30203185	2	Pavir.Ca00363.1	0.6694	-0.06994	-0.04	-0.02994	0.979461	AT2G43950.2	chloroplast outer envelope protein 37
30203200	1	Pavir.Ca01140.1	0.0526	0.7596	-0.04	0.7996	1.74062	AT2G47470.1	thioredoxin family protein
30203214	12	Pavir.Ca02753.1	0.0019	-0.24336	-0.04	-0.20336	0.868525	AT1G03090.2	methylcrotonyl-CoA carboxylase alpha chain, mitochondrial / 3-methylcrotonyl-CoA carboxylase 1 (MCCA)
30203232	1	Pavir.Ca01094.1	0.7107	0.1472	-0.04	0.1872	1.13855	AT5G58320.2	Kinase interacting (KIP1-like) family protein
30203251	1	Pavir.Ca01477.1	0.5916	-0.4234	-0.04	-0.3834	0.766629	AT5G60710.1	Zinc finger (C3HC4-type RING finger) family protein
30203253	1	Pavir.Ca01313.1	0.3385	-0.2175	-0.04	-0.1775	0.884234	AT5G04590.1	sulfite reductase
30203254	1	Pavir.Ca00321.1	0.4524	0.3541	-0.04	0.3941	1.31412	AT1G09830.1	Glycinamide ribonucleotide (GAR) synthetase
30203256	22	Pavir.Ca00978.1	0.1448	-0.1508	-0.04	-0.1108	0.926074	AT1G53240.1	Lactate/malate dehydrogenase family protein
30203264	1	Pavir.Ca00705.1	0.4307	0.7603	-0.04	0.8003	1.74146	AT3G45850.1	P-loop containing nucleoside triphosphate hydrolases superfamily protein
30203271	4	Pavir.Ca00722.1	0.7405	-0.07053	-0.04	-0.03053	0.979061	AT5G03040.2	IQ-domain 2
30203276	1	Pavir.Ca00496.1	0.1	-0.5009	-0.04	-0.4609	0.726533	AT5G53160.2	regulatory components of ABA receptor 3
30203299	1	Pavir.Ca00941.1	0.8368	0.09411	-0.04	0.13411	1.09742	AT4G29120.1	6-phosphogluconate dehydrogenase family protein
30203322	18	Pavir.Ca00665.1	0.0056	-0.2865	-0.04	-0.2465	0.842939	AT2G28680.1	RmlC-like cupins superfamily protein
30203340	48	Pavir.Ca00331.1	0.1453	0.07551	-0.04	0.11551	1.08336	AT5G05010.2	clathrin adaptor complexes medium subunit family protein
30203341	1	Pavir.Ca02927.1	0.0099	-1.1987	-0.04	-1.1587	0.447916	AT3G51000.1	alpha/beta-Hydrolases superfamily protein
30203354	1	Pavir.Ca00999.1	0.6875	-0.087	-0.04	-0.047	0.967947	AT1G19450.1	Major facilitator superfamily protein
30203356	5	Pavir.Ca01406.1	0.694	-0.09738	-0.04	-0.05738	0.961008	AT1G09850.1	xylem bark cysteine peptidase 3
30203357	5	Pavir.Ca00937.1	0.3	0.1273	-0.04	0.1673	1.12295	AT5G60860.1	RAB GTPase homolog A1F
30203403	12	Pavir.Ca01139.1	0.7785	0.0316	-0.04	0.0716	1.05088	AT3G62600.1	DNAJ heat shock family protein
30203415	1	Pavir.Ca02943.1	0.2294	-0.2042	-0.04	-0.1642	0.892423	AT1G29700.1	Metallo-hydrolase/oxidoreductase superfamily protein
30203466	4	Pavir.Ca02430.1	0.8321	-0.05154	-0.04	-0.01154	0.992033	AT5G45470.1	Protein of unknown function (DUF594)
30203470	2	Pavir.Ca02363.2	0.0947	-0.2488	-0.04	-0.2088	0.865257	AT2G20790.2	clathrin adaptor complexes medium subunit family protein
30203493	5	Pavir.Ca00246.1	0.3092	0.2181	-0.04	0.2581	1.1959	AT3G55140.1	Pectin lyase-like superfamily protein
30203516	1	Pavir.Ca02468.1	0.414	-0.1238	-0.04	-0.0838	0.943569	AT3G55460.1	SC35-like splicing factor 30
30203532	1	Pavir.Ca02067.1	0.536	-0.4398	-0.04	-0.3998	0.757963	AT5G40890.1	chloride channel A
30203547	4	Pavir.Ca01739.1	0.3507	-0.2317	-0.04	-0.1917	0.875573	AT5G24690.1	Protein of unknown function (DUF3411)
30203562	4	Pavir.Ca01767.1	0.849	-0.0268	-0.04	0.0132	1.00919	AT3G13860.1	heat shock protein 60-3A
30203563	1	Pavir.Ca02596.1	0.856	0.04328	-0.04	0.08328	1.05942	AT5G50840.2
30203570	1	Pavir.Ca01497.1	0.2466	0.5125	-0.04	0.5525	1.46662	AT4G23630.1	VIRB2-interacting protein 1
30203577	3	Pavir.Ca02490.1	0.8363	-0.05516	-0.04	-0.01516	0.989547	AT1G13750.1	Purple acid phosphatases superfamily protein
30203592	1	Pavir.Ca00233.1	0.776	0.1035	-0.04	0.1435	1.10458	AT1G10950.1	transmembrane nine 1
30203639	3	Pavir.Ca00576.1	0.3768	-0.1629	-0.04	-0.1229	0.91834	AT2G25770.1	Polyketide cyclase/dehydrase and lipid transport superfamily protein
30203660	3	Pavir.Ca00093.1	0.3993	0.2266	-0.04	0.2666	1.20297	AT3G56900.1	Transducin/WD40 repeat-like superfamily protein
30203685	5	Pavir.Ca01368.1	0.9747	-0.005026	-0.04	0.034974	1.02454	AT4G15000.1	Ribosomal L27e protein family
30203692	2	Pavir.Ca01181.1	0.4168	-0.248	-0.04	-0.208	0.865737	AT5G27650.1	Tudor/PWWP/MBT superfamily protein
30203695	5	Pavir.Ca01374.1	0.0009	0.4515	-0.04	0.4915	1.40591	AT4G18800.1	RAB GTPase homolog A1D
30203698	1	Pavir.Ca01147.1	0.9062	0.06534	-0.04	0.10534	1.07575	AT2G47580.1	spliceosomal protein U1A
30203719	2	Pavir.Ca01520.1	0.2264	0.2592	-0.04	0.2992	1.23046	AT3G01090.2	SNF1 kinase homolog 10
30203726	1	Pavir.Ca00302.1	0.1245	0.28	-0.04	0.32	1.24833	AT1G22940.1	thiamin biosynthesis protein, putative
30203727	2	Pavir.Ca02844.1	0.7433	0.04733	-0.04	0.08733	1.0624	AT3G63410.1	S-adenosyl-L-methionine-dependent methyltransferases superfamily protein
30203791	1	Pavir.Ca00457.1	0.8808	0.08987	-0.04	0.12987	1.0942	AT5G44635.1	minichromosome maintenance (MCM2/3/5) family protein
30203800	6	Pavir.Ca01850.1	0.1395	-0.371	-0.04	-0.331	0.794985	AT1G52690.1	Late embryogenesis abundant protein (LEA) family protein
30203806	1	Pavir.Ca00265.1	0.0279	-1.2337	-0.04	-1.1937	0.43718	AT4G03520.1	Thioredoxin superfamily protein
30203810	8	Pavir.Ca00381.1	0.424	0.1266	-0.04	0.1666	1.12241	AT3G03080.1	Zinc-binding dehydrogenase family protein
30203812	1	Pavir.Ca00270.1	0.2346	-1.0319	-0.04	-0.9919	0.502815	AT5G60710.1	Zinc finger (C3HC4-type RING finger) family protein
30203834	3	Pavir.Ca01530.1	0.3997	-0.2284	-0.04	-0.1884	0.877578	AT4G17520.1	Hyaluronan / mRNA binding family
30203843	3	Pavir.Ca01968.1	0.2103	-0.6399	-0.04	-0.5999	0.6598	AT2G28000.1	chaperonin-60alpha
30203847	14	Pavir.Ca01324.1	0.0275	0.19176	-0.04	0.23176	1.17427	AT1G08450.1	calreticulin 3
30203850	3	Pavir.Ca01135.1	0.1174	-0.8613	-0.04	-0.8213	0.565932	AT3G17020.1	Adenine nucleotide alpha hydrolases-like superfamily protein
30203911	1	Pavir.Ca00345.1	0.3771	0.333	-0.04	0.373	1.29504	AT1G14510.1	alfin-like 7
30203913	3	Pavir.Ca00996.1	0.3165	-0.3542	-0.04	-0.3142	0.804297	AT5G62810.1	peroxin 14
30203917	20	Pavir.Ca00868.1	0.0623	-0.16797	-0.04	-0.12797	0.915118	AT1G18080.1	Transducin/WD40 repeat-like superfamily protein
30203925	3	Pavir.Ca01030.1	0.1742	-0.2705	-0.04	-0.2305	0.852339	AT1G25350.2	glutamine-tRNA ligase, putative / glutaminyl-tRNA synthetase, putative / GlnRS, putative
30203934	3	Pavir.Ca00762.1	0.4179	-0.2567	-0.04	-0.2167	0.860532	AT2G47240.2	AMP-dependent synthetase and ligase family protein
30203948	7	Pavir.Ca02141.1	0.007	-0.4012	-0.04	-0.3612	0.778517	AT3G62020.1	germin-like protein 10
30203949	5	Pavir.Ca00716.1	0.836	0.01868	-0.04	0.05868	1.04151	AT3G45600.1	tetraspanin3
30203950	6	Pavir.Ca02621.1	0.0231	-0.3511	-0.04	-0.3111	0.806027	AT5G63310.1	nucleoside diphosphate kinase 2
30203971	1	Pavir.Ca00837.1	0.122	-0.3431	-0.04	-0.3031	0.810509	AT5G13120.1	cyclophilin 20-2
30203983	1	Pavir.Ca01190.1	0.7961	0.1266	-0.04	0.1666	1.12241	AT5G44710.1
30203998	7	Pavir.Ca01125.1	0.1372	0.2928	-0.04	0.3328	1.25946	AT1G09390.1	GDSL-like Lipase/Acylhydrolase superfamily protein
30204010	4	Pavir.Ca00410.1	0.1567	0.4473	-0.04	0.4873	1.40182	AT5G63400.1	adenylate kinase 1
30204012	5	Pavir.Ca00425.1	0.7509	0.06151	-0.04	0.10151	1.0729	AT1G21680.1	DPP6 N-terminal domain-like protein
30204015	5	Pavir.Ca02850.1	0.1445	-0.3514	-0.04	-0.3114	0.805859	AT2G34590.1	Transketolase family protein
30204031	1	Pavir.Ca02263.1	0.4456	0.453	-0.04	0.493	1.40737	AT5G45190.1	Cyclin family protein
30204041	1	Pavir.Ca00566.1	0.1378	0.3023	-0.04	0.3423	1.26778	AT3G53380.1	Concanavalin A-like lectin protein kinase family protein
30204063	40	Pavir.Ca01745.2	0.1393	-0.0828	-0.04	-0.0428	0.970769	AT5G62530.1	aldehyde dehydrogenase 12A1
30204078	6	Pavir.Ca02717.1	0.4423	-0.1361	-0.04	-0.0961	0.935559	AT5G11880.1	Pyridoxal-dependent decarboxylase family protein
30204086	1	Pavir.Ca00228.1	0.4401	-0.4831	-0.04	-0.4431	0.735552	AT1G58170.1	Disease resistance-responsive (dirigent-like protein) family protein
30204121	25	Pavir.Ca00561.1	0.4262	0.05206	-0.04	0.09206	1.06589	AT1G76680.1	12-oxophytodienoate reductase 1
30204126	1	Pavir.Ca01446.1	0.1742	-0.2293	-0.04	-0.1893	0.877031	AT2G38280.1	AMP deaminase, putative / myoadenylate deaminase, putative
30204135	2	Pavir.Ca00811.1	0.0207	-0.2973	-0.04	-0.2573	0.836652	AT4G25150.1	HAD superfamily, subfamily IIIB acid phosphatase
30204140	1	Pavir.Ca01916.1	0.1293	0.79	-0.04	0.83	1.77769	AT2G46000.1
30204177	3	Pavir.Ca02100.1	0.6503	-0.1555	-0.04	-0.1155	0.923062	AT3G22400.1	PLAT/LH2 domain-containing lipoxygenase family protein
30204190	2	Pavir.Ca01966.1	0.6161	-0.241	-0.04	-0.201	0.869947	AT3G59770.1	sacI homology domain-containing protein / WW domain-containing protein
30204196	7	Pavir.Ca02622.1	0.3135	0.1485	-0.04	0.1885	1.13958	AT4G12780.1	Chaperone DnaJ-domain superfamily protein
30204212	8	Pavir.Ca00229.1	0.4486	0.09898	-0.04	0.13898	1.10113	AT1G65870.1	Disease resistance-responsive (dirigent-like protein) family protein
30204217	1	Pavir.Ca00603.1	0.6637	-0.2689	-0.04	-0.2289	0.853285	AT5G24020.1	septum site-determining protein (MIND)
30204220	29	Pavir.Ca00979.1	0.3791	-0.05583	-0.04	-0.01583	0.989087	AT5G55190.1	RAN GTPase 3
30204234	1	Pavir.Ca00699.1	0.1719	0.5435	-0.04	0.5835	1.49848	AT2G37330.1	aluminum sensitive 3
30204245	2	Pavir.Ca02395.1	0.077	-0.4421	-0.04	-0.4021	0.756756	AT2G20690.1	lumazine-binding family protein
30204248	12	Pavir.Ca00424.1	0.3778	-0.1629	-0.04	-0.1229	0.91834	AT5G60710.1	Zinc finger (C3HC4-type RING finger) family protein
30204255	3	Pavir.Ca00065.1	0.5437	0.1095	-0.04	0.1495	1.10918	AT3G50520.1	Phosphoglycerate mutase family protein
30204300	1	Pavir.Ca00917.1	0.3349	0.9208	-0.04	0.9608	1.94639	AT1G16890.2	ubiquitin-conjugating enzyme 36
30204305	1	Pavir.Ca01570.1	0.6819	0.127	-0.04	0.167	1.12272	AT5G58450.1	Tetratricopeptide repeat (TPR)-like superfamily protein
30204317	5	Pavir.Ca02409.1	0.3885	-0.1033	-0.04	-0.0633	0.957072	AT5G61030.1	glycine-rich RNA-binding protein 3
30204342	6	Pavir.Ca02356.1	0.0794	-0.2295	-0.04	-0.1895	0.87691	AT1G08880.1	Histone superfamily protein
30204345	5	Pavir.Ca00666.1	0.0882	-0.4197	-0.04	-0.3797	0.768597	AT1G75270.1	dehydroascorbate reductase 2
30204353	5	Pavir.Ca01417.1	0.9894	-0.001497	-0.04	0.038503	1.02705	AT1G02880.3	thiamin pyrophosphokinase1
30204383	1	Pavir.Ca01751.1	0.7998	0.09209	-0.04	0.13209	1.09588	AT1G55340.1	Protein of unknown function (DUF1639)
30204387	5	Pavir.Ca02958.1	0.255	-0.2408	-0.04	-0.2008	0.870068	AT5G49555.1	FAD/NAD(P)-binding oxidoreductase family protein
30204418	1	Pavir.Ca02735.1	0.9372	-0.02397	-0.04	0.01603	1.01117	AT1G03030.1	P-loop containing nucleoside triphosphate hydrolases superfamily protein
30204466	1	Pavir.Ca00288.1	0.8713	-0.05482	-0.04	-0.01482	0.98978	AT1G15120.1	Ubiquinol-cytochrome C reductase hinge protein
30204485	2	Pavir.Ca01404.1	0.2001	-0.7748	-0.04	-0.7348	0.600901	AT1G45145.1	thioredoxin H-type 5
30204487	21	Pavir.Ca00886.1	0.0121	0.18638	-0.04	0.22638	1.1699	AT5G42080.1	dynamin-like protein
30204498	2	Pavir.Ca01314.1	0.9638	0.01342	-0.04	0.05342	1.03772	AT3G03560.1
30204500	2	Pavir.Ca01318.1	0.3402	0.312	-0.04	0.352	1.27633	AT5G04290.1	kow domain-containing transcription factor 1
30204502	15	Pavir.Ca01146.1	<.0001	-0.35008	-0.04	-0.31008	0.806597	AT3G05590.1	ribosomal protein L18
30204509	1	Pavir.Ca01032.1	0.7015	-0.06168	-0.04	-0.02168	0.985085	AT1G27000.1	Protein of unknown function (DUF1664)
30204528	1	Pavir.Ca00446.1	0.3132	0.3641	-0.04	0.4041	1.32326	AT5G57850.1	D-aminoacid aminotransferase-like PLP-dependent enzymes superfamily protein
30204537	4	Pavir.Ca02859.1	0.707	-0.07832	-0.04	-0.03832	0.973788	AT1G15340.1	methyl-CPG-binding domain 10
30204542	8	Pavir.Ca00898.1	0.0789	0.2271	-0.04	0.2671	1.20339	AT3G58660.1	Ribosomal protein L1p/L10e family
30204567	1	Pavir.Ca00809.1	0.7447	0.05319	-0.04	0.09319	1.06673	AT4G29330.1	DERLIN-1
30204578	1	Pavir.Ca02312.1	0.7921	-0.0529	-0.04	-0.0129	0.991098	AT3G21380.1	Mannose-binding lectin superfamily protein
30204579	7	Pavir.Ca00609.1	0.8707	-0.0297	-0.04	0.0103	1.00716	AT2G38870.1	Serine protease inhibitor, potato inhibitor I-type family protein
30204590	1	Pavir.Ca02870.1	0.2742	-0.2663	-0.04	-0.2263	0.854824	AT1G21370.1
30204597	2	Pavir.Ca01626.1	0.3193	-0.2243	-0.04	-0.1843	0.880076	AT3G51800.3	metallopeptidase M24 family protein
30204605	2	Pavir.Ca01341.1	0.1536	0.539	-0.04	0.579	1.49381	AT3G29310.1	calmodulin-binding protein-related
30204618	4	Pavir.Ca01394.1	0.597	-0.1365	-0.04	-0.0965	0.935299	AT3G04820.1	Pseudouridine synthase family protein
30204657	6	Pavir.Ca02760.1	0.1429	0.2846	-0.04	0.3246	1.25232	AT5G25880.1	NADP-malic enzyme 3
30204659	8	Pavir.Ca02918.1	0.3417	-0.1057	-0.04	-0.0657	0.955482	AT1G55810.3	uridine kinase-like 3
30204676	1	Pavir.Ca01993.1	0.145	0.7052	-0.04	0.7452	1.67621	AT5G01010.2
30204724	1	Pavir.Ca02362.1	0.9726	-0.007829	-0.04	0.032171	1.02255	AT5G27380.1	glutathione synthetase 2
30204737	3	Pavir.Ca01575.1	0.54	-0.2196	-0.04	-0.1796	0.882948	AT2G41430.5	dehydration-induced protein (ERD15)
30204744	2	Pavir.Ca01240.1	0.9076	0.02531	-0.04	0.06531	1.04631	AT3G17590.1	transcription regulatory protein SNF5, putative (BSH)
30204753	1	Pavir.Ca01351.1	0.3232	-0.6278	-0.04	-0.5878	0.665357	AT3G22270.1	Topoisomerase II-associated protein PAT1
30204759	1	Pavir.Ca02489.1	0.1791	-0.9459	-0.04	-0.9059	0.5337	AT4G34340.1	TBP-associated factor 8
30204775	13	Pavir.Ca01196.2	0.6752	0.05181	-0.04	0.09181	1.06571	AT4G35850.1	Pentatricopeptide repeat (PPR) superfamily protein
30204776	4	Pavir.Ca00832.1	0.6603	0.09383	-0.04	0.13383	1.0972	AT4G12340.1	copper ion binding
30204777	1	Pavir.Ca00334.1	0.4642	-0.1975	-0.04	-0.1575	0.896577	AT1G22800.1	S-adenosyl-L-methionine-dependent methyltransferases superfamily protein
30204791	22	Pavir.Ca02916.1	0.7228	0.031	-0.04	0.071	1.05044	AT5G62670.1	H(+)-ATPase 11
30204796	1	Pavir.Ca01229.1	0.8522	-0.04661	-0.04	-0.00661	0.995429	AT5G17540.1	HXXXD-type acyl-transferase family protein
30204800	2	Pavir.Ca02657.1	0.1455	-0.6007	-0.04	-0.5607	0.677973
30204805	1	Pavir.Ca00468.1	0.7216	-0.124	-0.04	-0.084	0.943438	AT5G11560.1	catalytics
30204806	3	Pavir.Ca01671.1	0.0241	-0.5721	-0.04	-0.5321	0.691547	ATCG01120.1	chloroplast ribosomal protein S15
30204809	3	Pavir.Ca00335.1	0.5327	0.2037	-0.04	0.2437	1.18403	AT1G33800.1	Protein of unknown function (DUF579)
30204811	1	Pavir.Ca02133.1	0.138	-0.5821	-0.04	-0.5421	0.686771
30204812	1	Pavir.Ca00041.1	0.189	0.5798	-0.04	0.6198	1.53666	AT5G04740.1	ACT domain-containing protein
30204838	5	Pavir.Ca02754.1	0.6413	-0.1134	-0.04	-0.0734	0.950396	AT3G22750.1	Protein kinase superfamily protein
30204867	11	Pavir.Ca01941.1	0.6536	-0.05781	-0.04	-0.01781	0.987731	AT4G13660.1	pinoresinol reductase 2
30204883	1	Pavir.Ca00663.1	0.6538	0.07278	-0.04	0.11278	1.08131	AT3G55270.1	mitogen-activated protein kinase phosphatase 1
30204886	1	Pavir.Ca02271.1	0.5501	0.2193	-0.04	0.2593	1.1969
30204892	2	Pavir.Ca01832.1	0.0952	0.7293	-0.04	0.7693	1.70444	AT3G19980.1	flower-specific, phytochrome-associated protein phosphatase 3
30204894	23	Pavir.Ca02070.1	0.4032	-0.07479	-0.04	-0.03479	0.976174	AT3G62120.1	Class II aaRS and biotin synthetases superfamily protein
30204896	3	Pavir.Ca02185.1	0.9443	0.0108	-0.04	0.0508	1.03584	AT4G31360.1	selenium binding
30204915	12	Pavir.Ca00568.1	0.1467	-0.2164	-0.04	-0.1764	0.884908	AT3G45300.1	isovaleryl-CoA-dehydrogenase
30204926	1	Pavir.Ca01397.1	0.9716	-0.005122	-0.04	0.034878	1.02447	AT5G09500.1	Ribosomal protein S19 family protein
30204936	14	Pavir.Ca01104.1	0.0189	-0.2563	-0.04	-0.2163	0.86077	AT3G51840.1	acyl-CoA oxidase 4
30204940	1	Pavir.Ca02922.1	0.0239	2.0533	-0.04	2.0933	4.26723	AT2G16430.2	purple acid phosphatase 10
30204953	1	Pavir.Ca01127.1	0.478	-0.5612	-0.04	-0.5212	0.696792	AT1G09330.1
30204962	4	Pavir.Ca02792.1	0.8257	0.04473	-0.04	0.08473	1.06049	AT3G04610.1	RNA-binding KH domain-containing protein
30204990	1	Pavir.Ca02254.1	0.1978	-0.9532	-0.04	-0.9132	0.531006	AT3G10650.1
30204996	3	Pavir.Ca01453.1	0.1217	-0.3257	-0.04	-0.2857	0.820343	AT5G01970.1
30205030	1	Pavir.Ca01427.1	0.7188	-0.391	-0.04	-0.351	0.78404	AT3G62810.1	complex 1 family protein / LVR family protein
30205050	1	Pavir.Ca00503.1	0.9507	0.01958	-0.04	0.05958	1.04216	AT1G56720.2	Protein kinase superfamily protein
30205054	4	Pavir.Ca00812.1	0.5199	0.09599	-0.04	0.13599	1.09885	AT4G25150.1	HAD superfamily, subfamily IIIB acid phosphatase
30205106	10	Pavir.Ca00948.1	0.0901	-0.1734	-0.04	-0.1334	0.91168	AT1G11910.1	aspartic proteinase A1
30205119	1	Pavir.Ca01393.1	0.4778	0.135	-0.04	0.175	1.12896	AT3G22760.1	Tesmin/TSO1-like CXC domain-containing protein
30205120	4	Pavir.Ca02455.1	0.3733	-0.16	-0.04	-0.12	0.920188	AT1G09430.1	ATP-citrate lyase A-3
30205157	24	Pavir.Ca00108.1	0.0323	-0.2229	-0.04	-0.1829	0.88093	AT3G52990.1	Pyruvate kinase family protein
30205160	5	Pavir.Ca02094.1	0.3352	-0.2776	-0.04	-0.2376	0.848155	AT1G27900.1	RNA helicase family protein
30205161	1	Pavir.Ca01017.1	0.483	-0.749	-0.04	-0.709	0.611744	AT2G29890.1	villin-like 1
30205169	4	Pavir.Ca00562.1	0.9301	0.02105	-0.04	0.06105	1.04322	AT1G48410.1	Stabilizer of iron transporter SufD / Polynucleotidyl transferase
30205172	1	Pavir.Ca00281.1	0.5046	-0.1564	-0.04	-0.1164	0.922487	AT5G09220.1	amino acid permease 2
30205242	1	Pavir.Ca00958.1	0.7841	0.1477	-0.04	0.1877	1.13895	AT3G27830.1	ribosomal protein L12-A
30205259	2	Pavir.Ca02828.1	0.7073	0.06619	-0.04	0.10619	1.07638	AT3G63520.1	carotenoid cleavage dioxygenase 1
30205263	1	Pavir.Ca02505.1	0.0853	0.4001	-0.04	0.4401	1.3567	AT5G39380.1	Plant calmodulin-binding protein-related
30205274	13	Pavir.Ca00874.1	0.6979	0.05584	-0.04	0.09584	1.06869	AT5G08680.1	ATP synthase alpha/beta family protein
30205276	4	Pavir.Ca01955.1	0.8456	0.02524	-0.04	0.06524	1.04626	AT5G61450.1	P-loop containing nucleoside triphosphate hydrolases superfamily protein
30205294	1	Pavir.Ca02041.1	0.1805	-1.1092	-0.04	-1.0692	0.476583	AT5G26570.1	catalytics;carbohydrate kinases;phosphoglucan, water dikinases
30205301	1	Pavir.Ca00559.1	0.6981	-0.1275	-0.04	-0.0875	0.941152	AT5G42140.1	Regulator of chromosome condensation (RCC1) family with FYVE zinc finger domain
30205313	2	Pavir.Ca00749.1	0.9737	-0.01263	-0.04	0.02737	1.01915	AT1G56440.1	Tetratricopeptide repeat (TPR)-like superfamily protein
30205347	1	Pavir.Ca00635.1	0.0626	-0.4869	-0.04	-0.4469	0.733618	AT3G09410.1	Pectinacetylesterase family protein
30205361	1	Pavir.Ca00403.1	0.4567	-0.4932	-0.04	-0.4532	0.730421	AT2G35530.1	basic region/leucine zipper transcription factor 16
30205369	3	Pavir.Ca01118.1	0.6647	0.1101	-0.04	0.1501	1.10965	AT3G16520.3	UDP-glucosyl transferase 88A1
30205372	25	Pavir.Ca01753.1	0.0149	-0.14818	-0.04	-0.10818	0.927758	AT2G19730.1	Ribosomal L28e protein family
30205375	14	Pavir.Ca00431.1	0.9255	-0.009506	-0.04	0.030494	1.02136	AT5G49910.1	chloroplast heat shock protein 70-2
30205392	2	Pavir.Ca02566.1	0.1929	-0.6277	-0.04	-0.5877	0.665403	AT5G61310.2	Cytochrome c oxidase subunit Vc family protein
30205394	1	Pavir.Ca00746.1	0.8161	0.08638	-0.04	0.12638	1.09155	AT3G62420.1	basic region/leucine zipper motif 53
30205396	1	Pavir.Ca02426.1	0.5125	0.1579	-0.04	0.1979	1.14703	AT5G55610.1
30205399	4	Pavir.Ca02334.1	0.6506	-0.1139	-0.04	-0.0739	0.950066	AT3G21400.1
30205404	1	Pavir.Ca01825.1	0.5417	0.1578	-0.04	0.1978	1.14695	AT1G27440.1	Exostosin family protein
30205406	1	Pavir.Ca02533.1	0.3116	-0.3336	-0.04	-0.2936	0.815864	AT1G27450.1	adenine phosphoribosyl transferase 1
30205422	3	Pavir.Ca02412.1	0.7652	-0.07716	-0.04	-0.03716	0.974572	AT4G08790.1	Nitrilase/cyanide hydratase and apolipoprotein N-acyltransferase family protein
30205432	1	Pavir.Ca02522.1	0.618	-0.2082	-0.04	-0.1682	0.889952	AT3G01100.1	hypothetical protein 1
30205456	1	Pavir.Ca00969.1	0.2968	-0.408	-0.04	-0.368	0.774856	AT3G61610.1	Galactose mutarotase-like superfamily protein
30205461	1	Pavir.Ca00927.1	0.9894	0.004338	-0.04	0.044338	1.03121	AT5G46070.1	Guanylate-binding family protein
30205470	1	Pavir.Ca01338.1	0.9493	0.01942	-0.04	0.05942	1.04205	AT1G18650.1	plasmodesmata callose-binding protein 3
30205471	2	Pavir.Ca00570.1	0.0102	-0.5431	-0.04	-0.5031	0.705589	AT3G51010.1
30205475	10	Pavir.Ca00213.1	0.0209	0.18919	-0.04	0.22919	1.17218	AT5G09810.1	actin 7
30205500	18	Pavir.Ca00211.1	0.0575	-0.2288	-0.04	-0.1888	0.877335	AT1G43700.1	VIRE2-interacting protein 1
30205507	5	Pavir.Ca01643.1	0.135	-0.2235	-0.04	-0.1835	0.880564	AT4G12290.1	Copper amine oxidase family protein
30205512	2	Pavir.Ca00814.1	0.2701	-0.3388	-0.04	-0.2988	0.812928	AT4G22720.2	Actin-like ATPase superfamily protein
30205534	1	Pavir.Ca02197.1	0.6813	-0.1123	-0.04	-0.0723	0.95112	AT5G60790.1	ABC transporter family protein
30205550	1	Pavir.Ca01188.1	0.3999	-0.808	-0.04	-0.768	0.587231	AT3G05030.1	sodium hydrogen exchanger 2
30205563	1	Pavir.Ca02519.1	0.5805	-0.3355	-0.04	-0.2955	0.81479	AT4G37340.1	cytochrome P450, family 81, subfamily D, polypeptide 3
30205564	1	Pavir.Ca00889.1	0.8885	-0.03399	-0.04	0.00601	1.00417	AT4G20300.2	Protein of unknown function (DUF1639)
30205566	2	Pavir.Ca00546.1	0.0685	-0.514	-0.04	-0.474	0.719966	AT4G24290.2	MAC/Perforin domain-containing protein
30205569	2	Pavir.Ca02248.1	0.575	-0.06574	-0.04	-0.02574	0.982317	AT4G33670.1	NAD(P)-linked oxidoreductase superfamily protein
30205593	3	Pavir.Ca01273.1	0.0103	-0.3493	-0.04	-0.3093	0.807033	AT4G12280.1	copper amine oxidase family protein
30205637	7	Pavir.Ca02911.1	0.1143	-0.3169	-0.04	-0.2769	0.825363	AT1G74790.1	catalytics
30205638	1	Pavir.Ca00291.1	0.6255	0.0973	-0.04	0.1373	1.09984	AT5G58770.1	Undecaprenyl pyrophosphate synthetase family protein
30205646	1	Pavir.Ca01447.1	0.9522	0.01755	-0.04	0.05755	1.0407	AT3G15970.1	NUP50 (Nucleoporin 50 kDa) protein
30205665	7	Pavir.Ca01124.1	0.3594	-0.142	-0.04	-0.102	0.93174	AT1G48030.1	mitochondrial lipoamide dehydrogenase 1
30205667	4	Pavir.Ca02836.1	0.0095	0.3628	-0.04	0.4028	1.32207	AT5G57120.1
30205689	5	Pavir.Ca00101.1	0.2923	-0.192	-0.04	-0.152	0.900002	AT5G27600.1	long-chain acyl-CoA synthetase 7
30205712	2	Pavir.Ca00347.1	0.6465	-0.1135	-0.04	-0.0735	0.95033	AT4G12910.1	serine carboxypeptidase-like 20
30205723	7	Pavir.Ca02506.1	0.0685	-0.2445	-0.04	-0.2045	0.867839	AT5G61250.1	glucuronidase 1
30205731	1	Pavir.Ca01565.1	0.1792	-0.8849	-0.04	-0.8449	0.556749	AT3G56460.1	GroES-like zinc-binding alcohol dehydrogenase family protein
30205752	1	Pavir.Ca00848.1	0.322	-0.1557	-0.04	-0.1157	0.922934	AT5G23490.1
30205755	1	Pavir.Ca02575.1	0.1497	-0.5871	-0.04	-0.5471	0.684394	AT4G15510.1	Photosystem II reaction center PsbP family protein
30205801	8	Pavir.Ca00060.1	0.8802	-0.02109	-0.04	0.01891	1.01319	AT1G10390.1	Nucleoporin autopeptidase
30205829	3	Pavir.Ca02609.1	0.8952	-0.0343	-0.04	0.0057	1.00396	AT3G17900.1
30205859	1	Pavir.Ca00400.1	0.9706	0.00721	-0.04	0.04721	1.03326	AT5G63280.1	C2H2-like zinc finger protein
30205863	1	Pavir.Ca00148.1	0.1312	-0.2957	-0.04	-0.2557	0.837581	AT1G08320.3	bZIP transcription factor family protein
30205864	1	Pavir.Ca00598.1	0.7589	-0.02933	-0.04	0.01067	1.00742	AT3G27430.2	N-terminal nucleophile aminohydrolases (Ntn hydrolases) superfamily protein
30205873	1	Pavir.Ca00109.1	0.8505	0.04624	-0.04	0.08624	1.0616	AT5G49210.1
30205882	6	Pavir.Ca02289.1	0.8211	0.06147	-0.04	0.10147	1.07287	AT5G10770.1	Eukaryotic aspartyl protease family protein
30205885	1	Pavir.Ca00758.1	0.2013	0.3811	-0.04	0.4211	1.33895	AT5G50375.1	cyclopropyl isomerase
30205904	4	Pavir.Ca00282.1	0.7224	-0.07823	-0.04	-0.03823	0.973849	AT1G34430.1	2-oxoacid dehydrogenases acyltransferase family protein
30205929	1	Pavir.Ca00884.1	0.8359	-0.08318	-0.04	-0.04318	0.970513	AT1G74270.1	Ribosomal protein L35Ae family protein
30205936	1	Pavir.Ca00075.1	0.3796	-0.1645	-0.04	-0.1245	0.917322	AT1G74040.1	2-isopropylmalate synthase 1
30205940	7	Pavir.Ca01912.1	0.83	-0.052	-0.04	-0.012	0.991717	AT5G55860.1	Plant protein of unknown function (DUF827)
30205959	1	Pavir.Ca00279.1	0.8278	-0.1621	-0.04	-0.1221	0.918849	AT1G58110.2	Basic-leucine zipper (bZIP) transcription factor family protein
30205981	1	Pavir.Ca00350.1	0.087	-1.012	-0.04	-0.972	0.509799	AT1G79620.1	Leucine-rich repeat protein kinase family protein
30206008	8	Pavir.Ca00159.1	0.8279	-0.04208	-0.04	-0.00208	0.998559	AT2G24490.1	replicon protein A2
30206011	1	Pavir.Ca00590.1	0.769	0.03084	-0.04	0.07084	1.05033	AT5G26667.1	P-loop containing nucleoside triphosphate hydrolases superfamily protein
30206026	1	Pavir.Ca00932.1	0.8099	0.07436	-0.04	0.11436	1.08249	AT2G20520.1	FASCICLIN-like arabinogalactan 6
30206027	1	Pavir.Ca02380.1	0.8416	0.07913	-0.04	0.11913	1.08608	AT1G10200.1	GATA type zinc finger transcription factor family protein
30206033	17	Pavir.Ca00973.1	0.8907	-0.01738	-0.04	0.02262	1.0158	AT3G58610.3	ketol-acid reductoisomerase
30206046	2	Pavir.Ca02217.1	0.647	0.2666	-0.04	0.3066	1.23679	AT3G19340.1	Protein of unknown function (DUF3754)
30206054	13	Pavir.Ca00847.1	0.3914	-0.07546	-0.04	-0.03546	0.975721	AT5G62810.1	peroxin 14
30206073	2	Pavir.Ca01409.1	0.285	0.262	-0.04	0.302	1.23285	AT3G62240.1	RING/U-box superfamily protein
30206077	1	Pavir.Ca00256.1	0.7152	-0.2407	-0.04	-0.2007	0.870128	AT4G33470.1	histone deacetylase 14
30206078	1	Pavir.Ca00550.1	0.6794	-0.2501	-0.04	-0.2101	0.864477	AT5G49810.1	methionine S-methyltransferase
30206088	3	Pavir.Ca01526.1	0.7111	-0.1319	-0.04	-0.0919	0.938286	AT2G34700.1	Pollen Ole e 1 allergen and extensin family protein
30206091	6	Pavir.Ca01067.1	0.9998	-4.723e-05	-0.04	0.0399528	1.02808	AT1G14650.2	SWAP (Suppressor-of-White-APricot)/surp domain-containing protein / ubiquitin family protein
30206106	7	Pavir.Ca02920.1	0.0001	-0.5794	-0.04	-0.5394	0.688057	AT2G16430.2	purple acid phosphatase 10
30206118	1	Pavir.Ca01358.1	0.9736	-0.02682	-0.04	0.01318	1.00918	AT5G44210.1	erf domain protein 9
30206124	2	Pavir.Ca00433.1	0.7399	-0.08549	-0.04	-0.04549	0.968961	AT5G64040.1	photosystem I reaction center subunit PSI-N, chloroplast, putative / PSI-N, putative (PSAN)
30206127	2	Pavir.Ca00423.1	0.3662	0.3224	-0.04	0.3624	1.28556	AT1G21680.1	DPP6 N-terminal domain-like protein
30206146	12	Pavir.Ca01295.1	0.3319	-0.1064	-0.04	-0.0664	0.955018	AT1G05260.1	Peroxidase superfamily protein
30206149	5	Pavir.Ca01395.1	0.0161	-0.3922	-0.04	-0.3522	0.783389	AT4G02580.1	NADH-ubiquinone oxidoreductase 24 kDa subunit, putative
30206155	7	Pavir.Ca01186.1	0.1132	0.2295	-0.04	0.2695	1.20539	AT1G79590.2	syntaxin of plants 52
30206161	4	Pavir.Ca01699.1	0.0481	0.5401	-0.04	0.5801	1.49495	AT4G35160.1	O-methyltransferase family protein
30206177	3	Pavir.Ca00744.1	0.9879	-0.002917	-0.04	0.037083	1.02604	AT1G80600.1	HOPW1-1-interacting 1
30206192	1	Pavir.Ca00269.1	0.9213	0.02996	-0.04	0.06996	1.04969	AT5G60710.1	Zinc finger (C3HC4-type RING finger) family protein
30206195	9	Pavir.Ca00782.1	0.6019	-0.09749	-0.04	-0.05749	0.960934	AT5G05340.1	Peroxidase superfamily protein
30206198	8	Pavir.Ca00477.1	0.6489	-0.0859	-0.04	-0.0459	0.968685	AT3G24550.1	proline extensin-like receptor kinase 1
30206199	6	Pavir.Ca02032.1	0.0073	-0.5049	-0.04	-0.4649	0.724521	AT1G09340.1	chloroplast RNA binding
30206201	16	Pavir.Ca01137.2	0.8225	-0.02574	-0.04	0.01426	1.00993	AT3G16950.2	lipoamide dehydrogenase 1
30206217	14	Pavir.Ca02407.1	0.5242	0.09614	-0.04	0.13614	1.09896	AT1G69230.2	SPIRAL1-like2
30206220	1	Pavir.Ca01428.1	0.9867	0.003104	-0.04	0.043104	1.03033	AT1G16780.1	Inorganic H pyrophosphatase family protein
30206231	1	Pavir.Ca02138.1	0.9858	-0.005585	-0.04	0.034415	1.02414	AT2G44480.1	beta glucosidase 17
30206251	7	Pavir.Ca02846.1	0.2803	0.09704	-0.04	0.13704	1.09965	AT5G46160.1	Ribosomal protein L14p/L23e family protein
30206257	2	Pavir.Ca02020.1	0.0238	-1.0493	-0.04	-1.0093	0.496787	AT2G32810.1	beta galactosidase 9
30206259	18	Pavir.Ca00535.1	0.0673	-0.16783	-0.04	-0.12783	0.915207	AT1G75630.1	vacuolar H+-pumping ATPase 16 kDa proteolipid subunit 4
30206263	1	Pavir.Ca01312.1	0.007	0.7787	-0.04	0.8187	1.76382	AT1G61250.1	secretory carrier 3
30206276	2	Pavir.Ca01988.1	0.4452	0.1107	-0.04	0.1507	1.11011	AT3G08890.2	Protein of unknown function, DUF538
30206292	1	Pavir.Ca02360.1	0.5477	-0.2234	-0.04	-0.1834	0.880625	AT4G02980.1	endoplasmic reticulum auxin binding protein 1
30206314	1	Pavir.Ca02559.1	0.4392	-0.635	-0.04	-0.595	0.662044	AT4G37340.1	cytochrome P450, family 81, subfamily D, polypeptide 3
30206362	11	Pavir.Ca00525.1	0.0002	-0.26259	-0.04	-0.22259	0.857025	AT1G20850.1	xylem cysteine peptidase 2
30206374	1	Pavir.Ca00977.1	0.5388	0.2115	-0.04	0.2515	1.19044	AT4G18550.1	alpha/beta-Hydrolases superfamily protein
30206415	1	Pavir.Ca02034.1	0.988	-0.007607	-0.04	0.032393	1.02271	AT4G05530.1	indole-3-butyric acid response 1
30206419	7	Pavir.Ca00931.1	0.607	-0.09233	-0.04	-0.05233	0.964378	AT5G03170.1	FASCICLIN-like arabinogalactan-protein 11
30206421	1	Pavir.Ca01768.1	0.1341	-0.8246	-0.04	-0.7846	0.580513	AT2G47210.1	myb-like transcription factor family protein
30206437	3	Pavir.Ca00693.1	0.4363	0.3453	-0.04	0.3853	1.30613	AT2G37340.1	arginine/serine-rich zinc knuckle-containing protein 33
30206439	1	Pavir.Ca02434.1	0.0774	-0.3407	-0.04	-0.3007	0.811858	AT5G53530.1	vacuolar protein sorting 26A
30206463	4	Pavir.Ca01301.1	0.7198	0.086	-0.04	0.126	1.09126	AT5G54660.1	HSP20-like chaperones superfamily protein
30206464	1	Pavir.Ca00506.1	0.5285	-0.2507	-0.04	-0.2107	0.864118	AT5G45910.1	GDSL-like Lipase/Acylhydrolase superfamily protein
30206465	2	Pavir.Ca01138.1	0.8839	-0.04965	-0.04	-0.00965	0.993333	AT3G61650.1	gamma-tubulin
30206473	1	Pavir.Ca00072.1	0.5272	-0.2449	-0.04	-0.2049	0.867599	AT3G06130.1	Heavy metal transport/detoxification superfamily protein
30206497	1	Pavir.Ca01772.1	0.346	-0.1821	-0.04	-0.1421	0.906199	AT5G11950.2	Putative lysine decarboxylase family protein
30206505	1	Pavir.Ca00896.1	0.5295	0.377	-0.04	0.417	1.33515	AT4G30930.1	Ribosomal protein L21
30206509	1	Pavir.Ca02660.1	0.6643	-0.1008	-0.04	-0.0608	0.958732	AT2G47710.1	Adenine nucleotide alpha hydrolases-like superfamily protein
30206511	6	Pavir.Ca01881.1	0.0343	-0.3149	-0.04	-0.2749	0.826508	AT5G56760.1	serine acetyltransferase 1;1
30206512	2	Pavir.Ca01791.1	0.0815	0.278	-0.04	0.318	1.2466	AT4G39150.2	DNAJ heat shock N-terminal domain-containing protein
30206513	5	Pavir.Ca00563.1	0.1071	0.3289	-0.04	0.3689	1.29137	AT1G09630.1	RAB GTPase 11C
30206515	5	Pavir.Ca02951.1	0.2692	-0.1554	-0.04	-0.1154	0.923126	AT1G34360.1	translation initiation factor 3 (IF-3) family protein
30206525	1	Pavir.Ca01674.1	0.7362	0.05994	-0.04	0.09994	1.07173	AT5G58950.1	Protein kinase superfamily protein
30206536	2	Pavir.Ca00497.1	0.8148	0.09709	-0.04	0.13709	1.09968	AT1G64390.1	glycosyl hydrolase 9C2
30206560	1	Pavir.Ca00885.2	0.0462	-0.8444	-0.04	-0.8044	0.5726	AT4G13400.1	2-oxoglutarate (2OG) and Fe(II)-dependent oxygenase superfamily protein
30206564	2	Pavir.Ca00209.1	0.5194	0.2682	-0.04	0.3082	1.23816	AT4G26570.1	calcineurin B-like 3
30206583	4	Pavir.Ca02673.1	0.6963	-0.0617	-0.04	-0.0217	0.985071	AT3G62160.1	HXXXD-type acyl-transferase family protein
30206604	2	Pavir.Ca00032.2	0.1737	-0.475	-0.04	-0.435	0.739694	AT3G57080.1	Eukaryotic rpb5 RNA polymerase subunit family protein
30206660	1	Pavir.Ca00709.1	0.6123	0.4886	-0.04	0.5286	1.44253	AT5G13510.1	Ribosomal protein L10 family protein
30206683	5	Pavir.Ca01813.1	0.0792	-0.2631	-0.04	-0.2231	0.856723	AT2G01600.1	ENTH/ANTH/VHS superfamily protein
30206685	1	Pavir.Ca01334.1	0.7048	0.1546	-0.04	0.1946	1.14441	AT1G55900.1	Haloacid dehalogenase-like hydrolase (HAD) superfamily protein
30206700	5	Pavir.Ca01333.1	0.6995	-0.0529	-0.04	-0.0129	0.991098	AT1G71800.1	cleavage stimulating factor 64
30206710	4	Pavir.Ca02586.1	0.0737	-0.5786	-0.04	-0.5386	0.688439	AT4G28780.1	GDSL-like Lipase/Acylhydrolase superfamily protein
30206711	22	Pavir.Ca00552.1	0.0434	-0.17202	-0.04	-0.13202	0.912553	AT2G39990.1	eukaryotic translation initiation factor 2
30206728	1	Pavir.Ca01108.1	0.1486	-1.0792	-0.04	-1.0392	0.486597	AT1G07110.1	fructose-2,6-bisphosphatase
30206735	2	Pavir.Ca00025.1	0.5638	-0.1163	-0.04	-0.0763	0.948487	AT2G41600.5	Mitochondrial glycoprotein family protein
30206739	11	Pavir.Ca02452.1	0.1701	-0.2023	-0.04	-0.1623	0.893599	AT1G60500.1	Dynamin related protein 4C
30206742	4	Pavir.Ca01232.1	0.9077	-0.04308	-0.04	-0.00308	0.997867	AT1G51510.1	RNA-binding (RRM/RBD/RNP motifs) family protein
30206753	1	Pavir.Ca00467.1	0.0791	1.1021	-0.04	1.1421	2.20702	AT4G29080.1	phytochrome-associated protein 2
30206757	3	Pavir.Ca02393.1	0.384	-0.1598	-0.04	-0.1198	0.920315	AT1G13960.1	WRKY DNA-binding protein 4
30206761	1	Pavir.Ca01509.1	0.0544	-0.5291	-0.04	-0.4891	0.712469	AT4G14440.1	3-hydroxyacyl-CoA dehydratase 1
30206785	3	Pavir.Ca01862.1	0.8432	0.0356	-0.04	0.0756	1.0538	AT3G60500.1	3\'-5\'-exoribonuclease family protein
30206814	1	Pavir.Ca00982.1	0.8135	0.07613	-0.04	0.11613	1.08382	AT3G01490.1	Protein kinase superfamily protein
30206816	5	Pavir.Ca00257.1	0.7587	0.0634	-0.04	0.1034	1.0743	AT5G63980.1	Inositol monophosphatase family protein
30206817	2	Pavir.Ca00517.1	0.5411	-0.3387	-0.04	-0.2987	0.812985	AT2G42810.2	protein phosphatase 5.2
30206832	7	Pavir.Ca02374.1	0.7863	0.09122	-0.04	0.13122	1.09522	AT3G07770.1	HEAT SHOCK PROTEIN 89.1
30206858	1	Pavir.Ca00621.1	0.3751	-0.2298	-0.04	-0.1898	0.876727	AT2G47640.2	Small nuclear ribonucleoprotein family protein
30206873	2	Pavir.Ca00238.1	0.647	0.1062	-0.04	0.1462	1.10665	AT4G33490.2	Eukaryotic aspartyl protease family protein
30206883	8	Pavir.Ca01822.1	0.8012	-0.02455	-0.04	0.01545	1.01077	AT4G29840.1	Pyridoxal-5\'-phosphate-dependent enzyme family protein
30206890	5	Pavir.Ca00771.1	0.5731	0.1557	-0.04	0.1957	1.14528	AT4G01900.1	GLNB1 homolog
30206907	1	Pavir.Ca02824.1	0.4692	-0.2855	-0.04	-0.2455	0.843523	AT5G15050.1	Core-2/I-branching beta-1,6-N-acetylglucosaminyltransferase family protein
30206921	1	Pavir.Ca01364.1	0.2921	0.2579	-0.04	0.2979	1.22935	AT5G04000.2
30206937	1	Pavir.Ca00748.1	0.3578	0.7136	-0.04	0.7536	1.68599	AT1G23380.1	KNOTTED1-like homeobox gene 6
30206946	2	Pavir.Ca02119.1	0.7736	-0.05312	-0.04	-0.01312	0.990947	AT5G17540.1	HXXXD-type acyl-transferase family protein
30206954	4	Pavir.Ca02063.1	0.4753	-0.1932	-0.04	-0.1532	0.899254	AT3G14470.1	NB-ARC domain-containing disease resistance protein
30206960	13	Pavir.Ca01467.1	0.3788	-0.105	-0.04	-0.065	0.955945	AT2G47010.1
30206971	4	Pavir.Ca02189.1	0.1085	-0.5451	-0.04	-0.5051	0.704612	AT5G13200.1	GRAM domain family protein
30206984	4	Pavir.Ca00776.1	0.3003	-0.2829	-0.04	-0.2429	0.845045	AT4G33420.1	Peroxidase superfamily protein
30207067	1	Pavir.Ca00432.1	0.6669	-0.4152	-0.04	-0.3752	0.770999	AT3G01740.1	Mitochondrial ribosomal protein L37
30207100	2	Pavir.Ca00405.1	0.9806	0.004314	-0.04	0.044314	1.03119	AT1G67510.1	Leucine-rich repeat protein kinase family protein
30207111	6	Pavir.Ca02594.1	0.0936	0.3054	-0.04	0.3454	1.2705
30207112	2	Pavir.Ca00106.1	0.7622	0.05262	-0.04	0.09262	1.0663	AT1G51190.1	Integrase-type DNA-binding superfamily protein
30207135	1	Pavir.Ca00325.1	0.9878	-0.006126	-0.04	0.033874	1.02376	AT1G02816.1	Protein of unknown function, DUF538
30207143	2	Pavir.Ca00735.1	0.3997	0.132	-0.04	0.172	1.12662	AT5G01390.1	DNAJ heat shock family protein
30207147	4	Pavir.Ca00221.1	0.0404	-0.3537	-0.04	-0.3137	0.804576	AT3G53390.1	Transducin/WD40 repeat-like superfamily protein
30207158	2	Pavir.Ca00686.1	0.8652	0.05466	-0.04	0.09466	1.06781	AT3G46290.1	hercules receptor kinase 1
30207162	6	Pavir.Ca01894.1	0.2276	-0.4294	-0.04	-0.3894	0.763447	AT5G06600.1	ubiquitin-specific protease 12
30207171	1	Pavir.Ca00845.1	0.5983	0.2098	-0.04	0.2498	1.18904	AT2G28060.1	5\'-AMP-activated protein kinase beta-2 subunit protein
30207185	1	Pavir.Ca01420.1	0.2781	-0.1966	-0.04	-0.1566	0.897137	AT1G02850.2	beta glucosidase 11
30207203	29	Pavir.J05523.1	<.0001	-0.33531	-0.04	-0.29531	0.814897	AT3G09630.1	Ribosomal protein L4/L1 family
30207208	3	Pavir.J41046.1	0.0821	-0.4877	-0.04	-0.4477	0.733211	AT1G77330.1	2-oxoglutarate (2OG) and Fe(II)-dependent oxygenase superfamily protein
30207236	1	Pavir.J10015.1	0.2099	-1.3084	-0.04	-1.2684	0.41512	AT1G66430.1	pfkB-like carbohydrate kinase family protein
30207250	1	Pavir.J02707.1	0.8596	-0.05275	-0.04	-0.01275	0.991201	AT2G26920.1	Ubiquitin-associated/translation elongation factor EF1B protein
30207319	1	Pavir.J23880.1	0.6575	0.3806	-0.04	0.4206	1.33848	AT2G36320.1	A20/AN1-like zinc finger family protein
30207355	1	Pavir.J39006.1	0.3426	-0.5746	-0.04	-0.5346	0.69035	AT3G15730.1	phospholipase D alpha 1
30207419	2	Pavir.J00697.1	0.5684	-0.1515	-0.04	-0.1115	0.925625	AT2G27510.1	ferredoxin 3
30207424	1	Pavir.J00698.1	0.7563	-0.078	-0.04	-0.038	0.974004	AT5G24090.1	chitinase A
30207437	2	Pavir.J35387.1	0.0048	-0.7457	-0.04	-0.7057	0.613145	AT5G55050.1	GDSL-like Lipase/Acylhydrolase superfamily protein
30207466	2	Pavir.J15022.1	0.7485	0.1761	-0.04	0.2161	1.16159	AT3G62790.1	NADH-ubiquinone oxidoreductase-related
30207523	2	Pavir.J03627.1	0.9405	-0.01541	-0.04	0.02459	1.01719	AT1G48840.1	Plant protein of unknown function (DUF639)
30207524	2	Pavir.J13273.1	0.5139	0.1604	-0.04	0.2004	1.14902	AT1G49670.2	ARP protein (REF)
30207582	2	Pavir.J01202.1	0.0031	-0.5802	-0.04	-0.5402	0.687676
30207616	3	Pavir.J21269.1	0.8767	0.03505	-0.04	0.07505	1.0534	AT1G33140.1	Ribosomal protein L6 family
30207618	7	Pavir.J01656.1	0.0574	0.2842	-0.04	0.3242	1.25197	AT1G65290.1	mitochondrial acyl carrier protein 2
30207642	1	Pavir.J40289.1	0.6305	-0.3408	-0.04	-0.3008	0.811802	AT4G00570.1	NAD-dependent malic enzyme 2
30207644	1	Pavir.J24171.1	0.1376	-0.7458	-0.04	-0.7058	0.613102	AT1G22540.1	Major facilitator superfamily protein
30207662	4	Pavir.J19350.1	0.21	-0.2629	-0.04	-0.2229	0.856841
30207669	1	Pavir.J25048.1	0.3834	-1.64	-0.04	-1.6	0.329877	AT1G53290.1	Galactosyltransferase family protein
30207712	1	Pavir.J08954.1	0.2578	0.487	-0.04	0.527	1.44093	AT1G76080.1	chloroplastic drought-induced stress protein of 32 kD
30207716	2	Pavir.J33035.1	0.8129	0.08381	-0.04	0.12381	1.08961	AT3G12050.1	Aha1 domain-containing protein
30207724	2	Pavir.J10951.1	0.7826	-0.09183	-0.04	-0.05183	0.964712	AT1G53000.1	Nucleotide-diphospho-sugar transferases superfamily protein
30207734	9	Pavir.J02298.1	0.0019	0.3795	-0.04	0.4195	1.33746	AT4G10260.1	pfkB-like carbohydrate kinase family protein
30207737	2	Pavir.J13974.1	0.533	-0.1595	-0.04	-0.1195	0.920507	AT1G80670.1	Transducin/WD40 repeat-like superfamily protein
30207755	6	Pavir.J00942.1	0.6559	0.09108	-0.04	0.13108	1.09511	AT3G51610.1
30207756	1	Pavir.J00941.1	0.1527	0.3938	-0.04	0.4338	1.35079	AT1G06890.2	nodulin MtN21 /EamA-like transporter family protein
30207798	7	Pavir.J36542.1	0.5699	-0.04931	-0.04	-0.00931	0.993568	AT1G03230.1	Eukaryotic aspartyl protease family protein
30207852	1	Pavir.J08688.1	0.0981	-0.20537	-0.04	-0.16537	0.8917	AT5G03300.1	adenosine kinase 2
30207883	2	Pavir.J25957.1	0.8931	-0.07335	-0.04	-0.03335	0.977149	AT3G12980.1	histone acetyltransferase of the CBP family 5
30207981	1	Pavir.J10511.1	0.1378	0.4446	-0.04	0.4846	1.3992	AT2G37040.1	PHE ammonia lyase 1
30207993	1	Pavir.J34065.1	0.4551	0.626	-0.04	0.666	1.58667	AT1G11360.3	Adenine nucleotide alpha hydrolases-like superfamily protein
30208061	1	Pavir.J23894.1	0.354	0.4037	-0.04	0.4437	1.36009	AT5G03630.1	Pyridine nucleotide-disulphide oxidoreductase family protein
30208065	7	Pavir.J22774.1	0.2348	0.2125	-0.04	0.2525	1.19127	AT3G62940.3	Cysteine proteinases superfamily protein
30208097	8	Pavir.J15391.1	0.3224	-0.1413	-0.04	-0.1013	0.932193	AT3G19820.3	cell elongation protein / DWARF1 / DIMINUTO (DIM)
30208100	8	Pavir.J27092.1	0.3227	-0.1503	-0.04	-0.1103	0.926395	AT4G14030.2	selenium-binding protein 1
30208153	2	Pavir.J33423.1	0.8269	0.1448	-0.04	0.1848	1.13666	AT2G20560.1	DNAJ heat shock family protein
30208161	6	Pavir.J27913.1	0.0629	-0.4315	-0.04	-0.3915	0.762337	AT2G29630.2	thiaminC
30208179	1	Pavir.J26955.1	0.6743	-0.1836	-0.04	-0.1436	0.905257	AT5G45390.1	CLP protease P4
30208189	3	Pavir.J33960.1	0.1775	0.2971	-0.04	0.3371	1.26321	AT3G04600.3	Nucleotidylyl transferase superfamily protein
30208193	1	Pavir.J11716.1	0.0041	-0.8965	-0.04	-0.8565	0.552291	AT2G33550.1	Homeodomain-like superfamily protein
30208198	5	Pavir.J08202.1	0.1637	0.2269	-0.04	0.2669	1.20322	AT3G50660.1	Cytochrome P450 superfamily protein
30208285	1	Pavir.J40469.1	0.4903	-0.457	-0.04	-0.417	0.74898	AT5G15450.1	casein lytic proteinase B3
30208361	9	Pavir.J17697.1	0.1771	-0.1382	-0.04	-0.0982	0.934198	AT5G15090.2	voltage dependent anion channel 3
30208398	4	Pavir.J38467.1	0.0527	-0.4645	-0.04	-0.4245	0.745097	AT5G19150.2	pfkB-like carbohydrate kinase family protein
30208401	2	Pavir.J01055.1	0.3792	-0.2776	-0.04	-0.2376	0.848155	AT1G65680.1	expansin B2
30208419	2	Pavir.J05246.1	0.3715	0.2012	-0.04	0.2412	1.18198	AT5G63260.2	Zinc finger C-x8-C-x5-C-x3-H type family protein
30208473	6	Pavir.J01109.1	0.408	0.1168	-0.04	0.1568	1.11481	AT4G26310.1	elongation factor P (EF-P) family protein
30208476	32	Pavir.J31286.1	<.0001	-0.38992	-0.04	-0.34992	0.784628	AT2G30620.1	winged-helix DNA-binding transcription factor family protein
30208519	4	Pavir.J36580.1	0.4352	-0.06035	-0.04	-0.02035	0.985993	AT1G74050.1	Ribosomal protein L6 family protein
30208528	3	Pavir.J35250.1	0.3572	0.1213	-0.04	0.1613	1.11829	AT5G45910.1	GDSL-like Lipase/Acylhydrolase superfamily protein
30208547	3	Pavir.J07416.1	0.5627	-0.3376	-0.04	-0.2976	0.813605	AT5G62440.1	Protein of unknown function (DUF3223)
30208575	1	Pavir.J15640.1	0.6032	0.162	-0.04	0.202	1.15029	AT5G09770.1	Ribosomal protein L17 family protein
30208607	3	Pavir.J16382.1	0.1353	-0.5926	-0.04	-0.5526	0.68179	AT1G77180.2	chromatin protein family
30208624	6	Pavir.J03218.1	0.0001	-0.6042	-0.04	-0.5642	0.67633	AT2G15620.1	nitrite reductase 1
30208629	4	Pavir.J00363.1	0.3942	-0.1821	-0.04	-0.1421	0.906199	AT4G14440.1	3-hydroxyacyl-CoA dehydratase 1
30208650	4	Pavir.J03368.1	0.3215	-0.1433	-0.04	-0.1033	0.930901	AT4G10300.1	RmlC-like cupins superfamily protein
30208652	1	Pavir.J03369.1	0.4452	-0.7334	-0.04	-0.6934	0.618395	AT3G17220.1	pectin methylesterase inhibitor 2
30208699	1	Pavir.J09056.1	0.4364	-0.115	-0.04	-0.075	0.949342	AT2G40760.1	Rhodanese/Cell cycle control phosphatase superfamily protein
30208709	8	Pavir.J33239.1	0.5952	-0.07052	-0.04	-0.03052	0.979067	AT5G58670.1	phospholipase C1
30208713	3	Pavir.J39508.1	0.5095	-0.1495	-0.04	-0.1095	0.926909	AT1G09300.1	Metallopeptidase M24 family protein
30208723	6	Pavir.J40505.1	0.0063	-0.4048	-0.04	-0.3648	0.776577	AT5G62740.1	SPFH/Band 7/PHB domain-containing membrane-associated protein family
30208732	1	Pavir.J10232.1	0.7919	0.1089	-0.04	0.1489	1.10872	AT5G64370.1	beta-ureidopropionase
30208775	2	Pavir.J38412.1	0.5157	0.2443	-0.04	0.2843	1.21782	AT1G65060.1	4-coumarate:CoA ligase 3
30208793	1	Pavir.J09259.1	0.3555	-0.3015	-0.04	-0.2615	0.83422	AT4G23850.1	AMP-dependent synthetase and ligase family protein
30208804	1	Pavir.J14304.1	0.2684	-1.0386	-0.04	-0.9986	0.500485	AT5G06860.1	polygalacturonase inhibiting protein 1
30208848	2	Pavir.J36056.1	0.081	-0.3725	-0.04	-0.3325	0.794159	AT4G04885.1	PCF11P-similar protein 4
30208865	25	Pavir.J40578.1	0.2078	0.09679	-0.04	0.13679	1.09946	AT5G54810.1	tryptophan synthase beta-subunit 1
30208948	4	Pavir.Ia00211.1	0.9034	0.0442	-0.04	0.0842	1.0601	AT3G05420.1	acyl-CoA binding protein 4
30208955	1	Pavir.Ia00115.1	0.7669	-0.1807	-0.04	-0.1407	0.907079	AT3G54900.1	CAX interacting protein 1
30208966	2	Pavir.Ia01932.1	0.7784	0.128	-0.04	0.168	1.1235	AT4G14570.1	acylaminoacyl-peptidase-related
30208985	2	Pavir.Ia01743.1	0.0006	-0.7243	-0.04	-0.6843	0.622308	AT5G08380.1	alpha-galactosidase 1
30209004	1	Pavir.Ia01280.1	0.07	-0.7502	-0.04	-0.7102	0.611235	AT3G19010.1	2-oxoglutarate (2OG) and Fe(II)-dependent oxygenase superfamily protein
30209033	14	Pavir.Ia02573.1	<.0001	-0.43315	-0.04	-0.39315	0.761465	AT5G66150.1	Glycosyl hydrolase family 38 protein
30209041	18	Pavir.Ia03140.1	0.6121	-0.05565	-0.04	-0.01565	0.989211	AT1G35780.1
30209055	1	Pavir.Ia01255.1	0.7807	0.2511	-0.04	0.2911	1.22357	AT4G36860.1	LIM domain-containing protein
30209057	4	Pavir.Ia04443.1	0.0648	-0.7379	-0.04	-0.6979	0.616469	AT5G57490.1	voltage dependent anion channel 4
30209077	15	Pavir.Ia00182.1	0.0011	-0.21715	-0.04	-0.17715	0.884448	AT5G02960.1	Ribosomal protein S12/S23 family protein
30209089	5	Pavir.Ia04629.1	0.0002	-0.5098	-0.04	-0.4698	0.722065	AT5G67500.2	voltage dependent anion channel 2
30209092	5	Pavir.Ia01320.1	0.2099	0.3139	-0.04	0.3539	1.27801	AT1G13690.1	ATPase E1
30209098	6	Pavir.Ia03731.1	0.0105	-0.3679	-0.04	-0.3279	0.796695	AT5G27410.2	D-aminoacid aminotransferase-like PLP-dependent enzymes superfamily protein
30209110	2	Pavir.Ia03718.1	0.6503	-0.2558	-0.04	-0.2158	0.861069	AT3G57090.1	Tetratricopeptide repeat (TPR)-like superfamily protein
30209120	1	Pavir.Ia04471.1	0.7066	0.2421	-0.04	0.2821	1.21596	AT4G35090.1	catalase 2
30209150	3	Pavir.Ia00087.1	0.1439	0.416	-0.04	0.456	1.37173	AT5G16820.2	heat shock factor 3
30209169	1	Pavir.Ia00351.1	0.5124	-0.1819	-0.04	-0.1419	0.906325	AT5G66850.1	mitogen-activated protein kinase kinase kinase 5
30209179	1	Pavir.Ia00088.1	0.8622	-0.05813	-0.04	-0.01813	0.987512	AT1G24450.1	Ribonuclease III family protein
30209189	3	Pavir.Ia03205.1	0.2003	0.2871	-0.04	0.3271	1.25449	AT1G17020.1	senescence-related gene 1
30209195	3	Pavir.Ia00507.1	0.1529	0.4591	-0.04	0.4991	1.41333	AT1G17180.1	glutathione S-transferase TAU 25
30209219	3	Pavir.Ia02028.1	0.9397	-0.01769	-0.04	0.02231	1.01558	AT3G29090.1	pectin methylesterase 31
30209233	2	Pavir.Ia04414.1	0.2513	-0.4695	-0.04	-0.4295	0.742519	AT5G18490.1	Plant protein of unknown function (DUF946)
30209234	1	Pavir.Ia01856.1	0.4353	-0.5204	-0.04	-0.4804	0.716779	AT3G54840.1	Ras-related small GTP-binding family protein
30209235	2	Pavir.Ia01562.1	0.2381	-0.2297	-0.04	-0.1897	0.876788	AT5G53490.1	Tetratricopeptide repeat (TPR)-like superfamily protein
30209241	2	Pavir.Ia04533.1	0.9868	0.003175	-0.04	0.043175	1.03038	AT1G63830.2	PLAC8 family protein
30209262	1	Pavir.Ia00326.1	0.3925	-0.2849	-0.04	-0.2449	0.843874	AT4G37200.1	Thioredoxin superfamily protein
30209287	1	Pavir.Ia04593.1	0.1301	0.5206	-0.04	0.5606	1.47488	AT3G11450.1	DnaJ domain ;Myb-like DNA-binding domain
30209315	4	Pavir.Ia03569.1	0.8857	-0.05129	-0.04	-0.01129	0.992205	AT5G05440.1	Polyketide cyclase/dehydrase and lipid transport superfamily protein
30209330	3	Pavir.Ia00900.1	0.4516	0.2037	-0.04	0.2437	1.18403	AT2G02040.1	peptide transporter 2
30209335	3	Pavir.Ia02707.1	0.2074	-0.1853	-0.04	-0.1453	0.904191	AT1G65020.1
30209344	1	Pavir.Ia01658.1	0.5222	0.3091	-0.04	0.3491	1.27377	AT1G03950.1	vacuolar protein sorting-associated protein 2.3
30209347	1	Pavir.Ia03928.1	0.027	-0.8555	-0.04	-0.8155	0.568212	AT4G36010.2	Pathogenesis-related thaumatin superfamily protein
30209370	6	Pavir.Ia01322.1	0.4897	-0.09279	-0.04	-0.05279	0.96407	AT5G38900.1	Thioredoxin superfamily protein
30209395	7	Pavir.Ia02646.1	0.852	0.01964	-0.04	0.05964	1.04221	AT3G52850.1	vacuolar sorting receptor homolog 1
30209398	2	Pavir.Ia04758.1	0.8261	0.04418	-0.04	0.08418	1.06009	AT3G61860.1	RNA-binding (RRM/RBD/RNP motifs) family protein
30209409	2	Pavir.Ia00974.1	0.3085	-0.1911	-0.04	-0.1511	0.900564	AT1G45050.1	Ubiquitin-conjugating enzyme family protein
30209413	1	Pavir.Ia01084.1	0.7422	-0.1561	-0.04	-0.1161	0.922679	AT4G05410.1	Transducin/WD40 repeat-like superfamily protein
30209419	1	Pavir.Ia00103.1	0.7729	0.07669	-0.04	0.11669	1.08424	AT1G07980.1	nuclear factor Y, subunit C10
30209438	1	Pavir.Ia03695.1	0.2582	-0.3811	-0.04	-0.3411	0.789439	AT3G05060.1	NOP56-like pre RNA processing ribonucleoprotein
30209443	2	Pavir.Ia02749.1	0.7804	0.1367	-0.04	0.1767	1.1303	AT2G22300.2	signal responsive 1
30209464	3	Pavir.Ia02294.1	0.3485	0.311	-0.04	0.351	1.27544	AT2G04520.1	Nucleic acid-binding, OB-fold-like protein
30209471	1	Pavir.Ia02731.1	0.6008	-0.1541	-0.04	-0.1141	0.923959	AT5G47635.1	Pollen Ole e 1 allergen and extensin family protein
30209495	1	Pavir.Ia04892.1	0.5141	0.2086	-0.04	0.2486	1.18805	AT2G13840.1	Polymerase/histidinol phosphatase-like
30209499	5	Pavir.Ia00634.1	0.188	0.1901	-0.04	0.2301	1.17292	AT4G37930.1	serine transhydroxymethyltransferase 1
30209519	23	Pavir.Ia03660.1	0.0071	-0.23336	-0.04	-0.19336	0.874567	AT5G59950.5	RNA-binding (RRM/RBD/RNP motifs) family protein
30209528	2	Pavir.Ia04638.1	0.9538	-0.01213	-0.04	0.02787	1.01951	AT1G27752.1	Ubiquitin system component Cue protein
30209560	1	Pavir.Ia01113.1	0.5404	0.1569	-0.04	0.1969	1.14623	AT1G07710.1	Ankyrin repeat family protein
30209572	2	Pavir.Ia03895.1	0.5518	0.1545	-0.04	0.1945	1.14433	AT5G55640.1
30209585	1	Pavir.Ia04476.1	0.0372	0.9546	-0.04	0.9946	1.99253	AT5G66005.3	Expressed protein
30209647	2	Pavir.Ia00267.1	0.3534	0.2798	-0.04	0.3198	1.24816	AT1G07410.1	RAB GTPase homolog A2B
30209664	1	Pavir.Ia00569.1	0.9092	0.071	-0.04	0.111	1.07998	AT1G54390.2	PHD finger protein-related
30209670	2	Pavir.Ia01065.1	0.2673	-0.1628	-0.04	-0.1228	0.918403	AT1G13980.1	sec7 domain-containing protein
30209683	2	Pavir.Ia02859.1	0.8705	0.04952	-0.04	0.08952	1.06402
30209688	1	Pavir.Ia04118.1	0.3667	-0.8073	-0.04	-0.7673	0.587516	AT5G66730.1	C2H2-like zinc finger protein
30209725	6	Pavir.Ia01909.1	0.2792	0.2247	-0.04	0.2647	1.20139	AT4G14710.1	RmlC-like cupins superfamily protein
30209733	6	Pavir.Ia00909.1	0.3995	-0.1133	-0.04	-0.0733	0.950461	AT4G34490.1	cyclase associated protein 1
30209735	2	Pavir.Ia00122.1	0.0732	-0.3177	-0.04	-0.2777	0.824905	AT3G60810.1
30209740	2	Pavir.Ia00545.1	0.8753	0.0349	-0.04	0.0749	1.05329	AT4G16420.1	homolog of yeast ADA2 2B
30209750	1	Pavir.Ia01559.1	0.701	0.419	-0.04	0.459	1.37459	AT1G58290.1	Glutamyl-tRNA reductase family protein
30209765	2	Pavir.Ia00660.1	0.9625	0.01185	-0.04	0.05185	1.03659	AT3G07030.1	Alba DNA/RNA-binding protein
30209772	37	Pavir.Ia00869.1	0.3796	0.07325	-0.04	0.11325	1.08166	AT5G37510.2	NADH-ubiquinone dehydrogenase, mitochondrial, putative
30209773	1	Pavir.Ia04360.1	0.8556	0.07466	-0.04	0.11466	1.08272	AT1G10460.1	germin-like protein 7
30209777	4	Pavir.Ia04488.1	0.3734	-0.3967	-0.04	-0.3567	0.780949	AT2G17510.1	ribonuclease II family protein
30209780	4	Pavir.Ia01391.1	0.9493	-0.009685	-0.04	0.030315	1.02124	AT5G15180.1	Peroxidase superfamily protein
30209831	8	Pavir.Ia00787.1	0.3084	-0.2357	-0.04	-0.1957	0.873149	AT3G22600.1	Bifunctional inhibitor/lipid-transfer protein/seed storage 2S albumin superfamily protein
30209856	1	Pavir.Ia00349.1	0.3509	0.4929	-0.04	0.5329	1.44683	AT4G33950.1	Protein kinase superfamily protein
30209865	2	Pavir.Ia04422.1	0.2937	-0.6065	-0.04	-0.5665	0.675253	AT3G23920.1	beta-amylase 1
30209866	1	Pavir.Ia01125.1	0.9005	-0.07766	-0.04	-0.03766	0.974234	AT3G22980.1	Ribosomal protein S5/Elongation factor G/III/V family protein
30209884	1	Pavir.Ia04870.1	0.252	-0.3893	-0.04	-0.3493	0.784965	AT4G39490.1	cytochrome P450, family 96, subfamily A, polypeptide 10
30209886	1	Pavir.Ia04080.1	0.6645	0.2984	-0.04	0.3384	1.26435	AT1G71440.1	tubulin folding cofactor E / Pfifferling (PFI)
30209901	1	Pavir.Ia02618.1	0.4457	-0.2035	-0.04	-0.1635	0.892856	AT4G34320.1	Protein of unknown function (DUF677)
30209906	1	Pavir.Ia01804.1	0.9333	0.02636	-0.04	0.06636	1.04707	AT2G38110.1	glycerol-3-phosphate acyltransferase 6
30209915	2	Pavir.Ia00443.1	0.433	-0.4108	-0.04	-0.3708	0.773354	AT1G79010.1	Alpha-helical ferredoxin
30209916	3	Pavir.Ia01601.1	0.235	-0.4007	-0.04	-0.3607	0.778787	AT2G15220.1	Plant basic secretory protein (BSP) family protein
30209950	2	Pavir.Ia00264.1	0.0522	-0.18912	-0.04	-0.14912	0.9018	AT3G13440.1	S-adenosyl-L-methionine-dependent methyltransferases superfamily protein
30209952	1	Pavir.Ia00353.1	0.0589	-0.5968	-0.04	-0.5568	0.679808	AT5G67450.1	zinc-finger protein 1
30209961	1	Pavir.Ia00920.1	0.2953	-0.749	-0.04	-0.709	0.611744	AT2G16250.1	Leucine-rich repeat protein kinase family protein
30210019	6	Pavir.Ia00223.2	0.83	0.03643	-0.04	0.07643	1.05441	AT4G02340.1	alpha/beta-Hydrolases superfamily protein
30210043	3	Pavir.Ia04479.1	0.0144	0.8271	-0.04	0.8671	1.82399	AT1G20760.1	Calcium-binding EF hand family protein
30210061	1	Pavir.Ia00307.1	0.516	0.1949	-0.04	0.2349	1.17683	AT3G46220.1
30210076	8	Pavir.Ia00030.1	0.9267	0.01511	-0.04	0.05511	1.03894	AT2G43120.1	RmlC-like cupins superfamily protein
30210086	2	Pavir.Ia01989.1	0.7332	0.174	-0.04	0.214	1.1599	AT1G63800.1	ubiquitin-conjugating enzyme 5
30210096	11	Pavir.Ia04860.1	0.0257	0.3893	-0.04	0.4293	1.34658	AT2G47730.1	glutathione S-transferase phi 8
30210100	1	Pavir.Ia00565.1	0.7635	-0.03844	-0.04	0.00156	1.00108	AT5G37480.1
30210102	4	Pavir.Ia01151.1	0.8125	-0.06076	-0.04	-0.02076	0.985713	AT5G38640.1	NagB/RpiA/CoA transferase-like superfamily protein
30210116	5	Pavir.Ia00693.1	0.783	-0.03309	-0.04	0.00691	1.0048	AT4G34350.1	4-hydroxy-3-methylbut-2-enyl diphosphate reductase
30210143	2	Pavir.Ia01197.1	0.5988	0.2103	-0.04	0.2503	1.18945	AT5G58230.1	Transducin/WD40 repeat-like superfamily protein
30210147	2	Pavir.Ia01973.1	0.4983	-0.2983	-0.04	-0.2583	0.836073	AT1G59820.1	aminophospholipid ATPase 3
30210162	1	Pavir.Ia01462.1	0.7751	-0.06476	-0.04	-0.02476	0.982984	AT5G55640.1
30210166	6	Pavir.Ia02182.1	0.1868	0.2203	-0.04	0.2603	1.19773	AT1G65680.1	expansin B2
30210200	1	Pavir.Ia04240.1	0.2881	-0.3164	-0.04	-0.2764	0.825649	AT3G44880.1	Pheophorbide a oxygenase family protein with Rieske [2Fe-2S] domain
30210205	8	Pavir.Ia01243.1	0.669	-0.06355	-0.04	-0.02355	0.983809	AT3G04610.1	RNA-binding KH domain-containing protein
30210224	5	Pavir.Ia02959.1	0.0006	-0.6762	-0.04	-0.6362	0.643405	AT1G10360.1	glutathione S-transferase TAU 18
30210227	2	Pavir.Ia04504.1	0.1545	-0.5308	-0.04	-0.4908	0.71163	AT1G12460.1	Leucine-rich repeat protein kinase family protein
30210239	1	Pavir.Ia04212.1	0.1176	0.4992	-0.04	0.5392	1.45317	AT3G54700.1	phosphate transporter 1;7
30210265	1	Pavir.Ia03355.1	0.6009	0.3775	-0.04	0.4175	1.33561
30210269	8	Pavir.Ia00376.1	0.2982	-0.2044	-0.04	-0.1644	0.8923	AT1G14810.1	semialdehyde dehydrogenase family protein
30210270	1	Pavir.Ia03279.1	0.0709	0.4804	-0.04	0.5204	1.43435	AT1G02330.1
30210279	1	Pavir.Ia03835.1	0.2884	-0.1614	-0.04	-0.1214	0.919295	AT2G39840.1	type one serine/threonine protein phosphatase 4
30210283	3	Pavir.Ia03875.1	0.2875	0.3589	-0.04	0.3989	1.3185	AT1G13340.1	Regulator of Vps4 activity in the MVB pathway protein
30210290	1	Pavir.Ia01141.1	0.9791	-0.006839	-0.04	0.033161	1.02325	AT3G22190.2	IQ-domain 5
30210295	3	Pavir.Ia02631.1	0.3543	-0.1714	-0.04	-0.1314	0.912945	AT4G34940.1	armadillo repeat only 1
30210303	1	Pavir.Ia03750.1	0.5656	0.2195	-0.04	0.2595	1.19706	AT3G55530.1	RING/U-box superfamily protein
30210312	2	Pavir.Ia00978.1	0.8476	0.04727	-0.04	0.08727	1.06236	AT2G16400.1	BEL1-like homeodomain 7
30210328	5	Pavir.Ia04781.1	0.588	-0.1083	-0.04	-0.0683	0.953761	AT5G05980.1	DHFS-FPGS homolog B
30210331	3	Pavir.Ia04717.1	0.0762	-0.818	-0.04	-0.778	0.583175	AT3G18610.1	nucleolin like 2
30210332	3	Pavir.Ia02992.1	0.0863	-0.6994	-0.04	-0.6594	0.633142	AT3G25780.1	allene oxide cyclase 3
30210339	3	Pavir.Ia00040.1	0.3709	0.1815	-0.04	0.2215	1.16595	AT4G24840.1
30210343	7	Pavir.Ia03391.1	0.2793	-0.2588	-0.04	-0.2188	0.85928	AT5G27700.1	Ribosomal protein S21e
30210353	11	Pavir.Ia02068.1	0.355	-0.1016	-0.04	-0.0616	0.958201	AT4G09670.1	Oxidoreductase family protein
30210355	5	Pavir.Ia00224.2	0.6153	0.05125	-0.04	0.09125	1.06529	AT4G15940.1	Fumarylacetoacetate (FAA) hydrolase family
30210361	2	Pavir.Ia03897.1	0.1254	-0.6326	-0.04	-0.5926	0.663147	AT4G00026.1
30210367	1	Pavir.Ia01975.1	0.2582	-0.2114	-0.04	-0.1714	0.887981	AT5G40020.1	Pathogenesis-related thaumatin superfamily protein
30210389	5	Pavir.Ia04028.1	0.173	0.1384	-0.04	0.1784	1.13163	AT5G27470.1	seryl-tRNA synthetase / serine--tRNA ligase
30210392	2	Pavir.Ia00136.1	0.921	-0.03527	-0.04	0.00473	1.00328	AT5G58370.2	P-loop containing nucleoside triphosphate hydrolases superfamily protein
30210408	2	Pavir.Ia00595.1	0.057	-0.275	-0.04	-0.235	0.849685	AT4G29250.1	HXXXD-type acyl-transferase family protein
30210423	3	Pavir.Ia02300.1	0.8537	-0.03173	-0.04	0.00827	1.00575	AT1G65680.1	expansin B2
30210465	2	Pavir.Ia01114.1	0.6467	0.1928	-0.04	0.2328	1.17511	AT1G54410.1	dehydrin family protein
30210477	2	Pavir.Ia04107.1	0.5025	0.2433	-0.04	0.2833	1.21698	AT3G59650.1	mitochondrial ribosomal protein L51/S25/CI-B8 family protein
30210483	2	Pavir.Ia00379.1	0.6345	-0.2653	-0.04	-0.2253	0.855417	AT4G37370.1	cytochrome P450, family 81, subfamily D, polypeptide 8
30210489	6	Pavir.Ia04806.1	0.855	0.03034	-0.04	0.07034	1.04996	AT5G61510.1	GroES-like zinc-binding alcohol dehydrogenase family protein
30210495	1	Pavir.Ia01772.1	0.2515	0.4393	-0.04	0.4793	1.39407	AT4G05400.2	copper ion binding
30210501	1	Pavir.Ia01504.1	0.3831	0.5248	-0.04	0.5648	1.47918	AT3G24315.1	Sec20 family protein
30210551	1	Pavir.Ia00501.1	0.6539	0.1941	-0.04	0.2341	1.17617	AT2G34690.1	Glycolipid transfer protein (GLTP) family protein
30210561	1	Pavir.Ia00617.1	0.2565	-0.12837	-0.04	-0.08837	0.940585	AT1G55190.1	PRA1 (Prenylated rab acceptor) family protein
30210573	1	Pavir.Ia04525.1	0.9268	-0.0264	-0.04	0.0136	1.00947	AT5G64816.2
30210583	4	Pavir.Ia03680.1	0.5761	-0.1121	-0.04	-0.0721	0.951252	AT3G54440.1	glycoside hydrolase family 2 protein
30210601	46	Pavir.Ia03910.1	0.9998	-1.271e-05	-0.04	0.0399873	1.0281	AT5G62300.2	Ribosomal protein S10p/S20e family protein
30210609	2	Pavir.Ia03293.1	0.0058	0.3905	-0.04	0.4305	1.3477	AT3G17440.1	novel plant snare 13
30210620	6	Pavir.Ia04357.1	0.4932	0.1329	-0.04	0.1729	1.12732	AT5G21950.1	alpha/beta-Hydrolases superfamily protein
30210641	3	Pavir.Ia00123.1	0.01	0.4629	-0.04	0.5029	1.41706	AT1G12740.1	cytochrome P450, family 87, subfamily A, polypeptide 2
30210678	1	Pavir.Ia00535.1	0.8994	0.07671	-0.04	0.11671	1.08426	AT5G35840.1	phytochrome C
30210681	1	Pavir.Ia02533.1	0.4359	0.3825	-0.04	0.4225	1.34025
30210700	4	Pavir.Ia00619.1	0.2459	0.2596	-0.04	0.2996	1.2308	AT5G05920.1	deoxyhypusine synthase
30210701	6	Pavir.Ia00209.1	0.0025	0.5291	-0.04	0.5691	1.4836	AT2G27510.1	ferredoxin 3
30210712	3	Pavir.Ia04047.1	0.2892	-0.2355	-0.04	-0.1955	0.87327	AT2G30200.1	catalytics;transferases;[acyl-carrier-protein] S-malonyltransferases;binding
30210733	1	Pavir.Ia02778.1	0.3117	-0.7149	-0.04	-0.6749	0.626376	AT4G12230.1	alpha/beta-Hydrolases superfamily protein
30210765	3	Pavir.Ia00067.1	0.1299	0.435	-0.04	0.475	1.38992	AT5G60720.1	Protein of unknown function, DUF547
30210796	3	Pavir.Ia03296.1	0.3454	-0.274	-0.04	-0.234	0.850274	AT5G42180.1	Peroxidase superfamily protein
30210801	47	Pavir.Ia03418.1	0.1144	-0.08312	-0.04	-0.04312	0.970554	AT5G50950.2	FUMARASE 2
30210813	28	Pavir.Ia01108.1	0.146	0.1017	-0.04	0.1417	1.1032	AT5G17920.2	Cobalamin-independent synthase family protein
30210814	1	Pavir.Ia01456.1	0.2811	0.3984	-0.04	0.4384	1.3551	AT2G41900.1	CCCH-type zinc finger protein with ARM repeat domain
30210821	1	Pavir.Ia03653.1	0.878	-0.03483	-0.04	0.00517	1.00359	AT2G37500.1	arginine biosynthesis protein ArgJ family
30210829	5	Pavir.Ia03959.1	0.0084	0.6158	-0.04	0.6558	1.57549	AT1G61150.1	LisH and RanBPM domains containing protein
30210865	2	Pavir.Ia03667.1	0.0008	-0.7501	-0.04	-0.7101	0.611278	AT5G02500.1	heat shock cognate protein 70-1
30210895	4	Pavir.Ia03474.1	0.0133	-0.5748	-0.04	-0.5348	0.690254	AT5G05320.1	FAD/NAD(P)-binding oxidoreductase family protein
30210900	1	Pavir.Ia02908.1	0.7692	-0.076	-0.04	-0.036	0.975355	AT5G41410.1	POX (plant homeobox) family protein
30210902	4	Pavir.Ia03806.1	0.9585	0.01018	-0.04	0.05018	1.03539	AT3G62370.1	heme binding
30210910	1	Pavir.Ia04464.1	0.2046	1.3774	-0.04	1.4174	2.67104	AT1G16210.1
30210912	2	Pavir.Ia01397.1	0.0584	-0.7937	-0.04	-0.7537	0.593081	AT5G42510.1	Disease resistance-responsive (dirigent-like protein) family protein
30210919	4	Pavir.Ia00797.1	0.6105	0.1502	-0.04	0.1902	1.14092	AT2G02850.1	plantacyanin
30210934	1	Pavir.Ia02353.1	0.4113	0.1786	-0.04	0.2186	1.1636	AT5G64813.1	Ras-related small GTP-binding family protein
30210942	27	Pavir.Ia03031.1	0.2447	0.07269	-0.04	0.11269	1.08124	AT2G15480.2	UDP-glucosyl transferase 73B5
30210943	5	Pavir.Ia03120.1	0.5346	0.1211	-0.04	0.1611	1.11814	AT5G58220.1	transthyretin-like protein
30210947	4	Pavir.Ia03665.1	0.517	0.0867	-0.04	0.1267	1.09179	AT5G02500.1	heat shock cognate protein 70-1
30210963	1	Pavir.Ia01240.1	0.7294	0.1364	-0.04	0.1764	1.13006	AT2G30630.2	P-loop containing nucleoside triphosphate hydrolases superfamily protein
30210991	6	Pavir.Ia02278.1	0.4634	-0.1147	-0.04	-0.0747	0.94954	AT3G60190.1	DYNAMIN-like 1E
30210996	3	Pavir.Ia00033.1	0.1042	0.2928	-0.04	0.3328	1.25946	AT3G04830.1	Protein prenylyltransferase superfamily protein
30211006	5	Pavir.Ia03241.1	0.8682	0.03574	-0.04	0.07574	1.0539	AT3G50370.1
30211015	1	Pavir.Ia00220.1	0.1156	-0.715	-0.04	-0.675	0.626332	AT1G14870.1	PLANT CADMIUM RESISTANCE 2
30211091	1	Pavir.Ia00549.1	0.3823	-0.5198	-0.04	-0.4798	0.717077	AT1G04130.1	Tetratricopeptide repeat (TPR)-like superfamily protein
30211097	1	Pavir.Ia03849.1	0.3803	-0.2333	-0.04	-0.1933	0.874603	AT2G29690.1	anthranilate synthase 2
30211098	3	Pavir.Ia04121.1	0.0663	-0.3441	-0.04	-0.3041	0.809947	AT4G22110.2	GroES-like zinc-binding dehydrogenase family protein
30211112	9	Pavir.Ia01556.1	0.0013	0.4759	-0.04	0.5159	1.42989	AT3G48890.1	membrane-associated progesterone binding protein 3
30211114	36	Pavir.Ia03891.1	0.8363	-0.01309	-0.04	0.02691	1.01883	AT1G48850.1	chorismate synthase, putative / 5-enolpyruvylshikimate-3-phosphate phospholyase, putative
30211153	2	Pavir.Ia02012.1	0.5336	0.1694	-0.04	0.2094	1.15621	AT3G07300.2	NagB/RpiA/CoA transferase-like superfamily protein
30211162	1	Pavir.Ia01546.1	0.5924	0.1191	-0.04	0.1591	1.11659	AT5G23760.1	Copper transport protein family
30211168	2	Pavir.Ia04371.1	0.7665	-0.05177	-0.04	-0.01177	0.991875	AT5G35590.1	proteasome alpha subunit A1
30211214	1	Pavir.Ia00232.1	0.2898	-0.4195	-0.04	-0.3795	0.768704	AT2G47140.1	NAD(P)-binding Rossmann-fold superfamily protein
30211241	2	Pavir.Ia02321.1	0.1041	0.7022	-0.04	0.7422	1.67272	AT5G36160.1	Tyrosine transaminase family protein
30211243	1	Pavir.Ia04283.1	0.2566	-0.5316	-0.04	-0.4916	0.711236	AT3G54660.1	glutathione reductase
30211245	1	Pavir.Ia01140.1	0.0984	0.2493	-0.04	0.2893	1.22205	AT5G22060.1	DNAJ homologue 2
30211275	1	Pavir.Ia02956.1	0.3458	0.749	-0.04	0.789	1.72788	AT1G10360.1	glutathione S-transferase TAU 18
30211282	6	Pavir.Ia00481.1	0.4536	0.1575	-0.04	0.1975	1.14671	AT1G56050.1	GTP-binding protein-related
30211291	2	Pavir.Ia02372.1	0.0086	0.4822	-0.04	0.5222	1.43614	AT3G03190.1	glutathione S-transferase F11
30211299	9	Pavir.Ia03885.1	0.1484	0.2368	-0.04	0.2768	1.2115	AT2G28470.1	beta-galactosidase 8
30211316	2	Pavir.Ia02571.1	0.8145	0.02484	-0.04	0.06484	1.04597
30211331	7	Pavir.Ia04714.1	0.0431	-0.4502	-0.04	-0.4102	0.752519	AT1G14850.1	nucleoporin 155
30211338	2	Pavir.Ia00051.1	0.6191	0.1437	-0.04	0.1837	1.13579	AT2G28000.1	chaperonin-60alpha
30211342	1	Pavir.Ia00675.1	0.583	0.5542	-0.04	0.5942	1.50964	AT1G72280.1	endoplasmic reticulum oxidoreductins 1
30211353	12	Pavir.Ia00478.1	0.1384	-0.2105	-0.04	-0.1705	0.888535	AT5G62690.1	tubulin beta chain 2
30211364	4	Pavir.Ia01412.1	0.5986	0.1973	-0.04	0.2373	1.17878	AT4G24130.1	Protein of unknown function, DUF538
30211395	5	Pavir.Ia01427.1	0.9618	-0.0127	-0.04	0.0273	1.0191	AT4G36220.1	ferulic acid 5-hydroxylase 1
30211398	1	Pavir.Ia01239.1	0.6805	-0.05229	-0.04	-0.01229	0.991517	AT2G30590.1	WRKY DNA-binding protein 21
30211449	1	Pavir.Ia03336.1	0.2555	-0.3717	-0.04	-0.3317	0.7946	AT4G16380.1	Heavy metal transport/detoxification superfamily protein
30211460	2	Pavir.Ia00522.1	0.1862	-0.3035	-0.04	-0.2635	0.833064	AT5G60940.1	Transducin/WD40 repeat-like superfamily protein
30211466	2	Pavir.Ia04167.1	0.6543	-0.2315	-0.04	-0.1915	0.875695	AT4G33330.2	plant glycogenin-like starch initiation protein 3
30211469	8	Pavir.Ia00090.1	0.1053	-0.2457	-0.04	-0.2057	0.867118	AT5G46750.1	ARF-GAP domain 9
30211477	2	Pavir.Ia02868.1	0.5067	-0.2209	-0.04	-0.1809	0.882153	AT4G35300.1	tonoplast monosaccharide transporter2
30211482	5	Pavir.Ia02331.1	0.3532	0.08677	-0.04	0.12677	1.09185	AT5G16760.1	Inositol 1,3,4-trisphosphate 5/6-kinase family protein
30211504	8	Pavir.Ia03524.1	0.969	0.004	-0.04	0.044	1.03097	AT2G47390.1	Prolyl oligopeptidase family protein
30211523	2	Pavir.Ia02196.1	0.6951	0.08713	-0.04	0.12713	1.09212	AT4G17330.1	G2484-1 protein
30211536	1	Pavir.Ia04917.1	0.3333	-0.9732	-0.04	-0.9332	0.523695	AT3G21290.1	dentin sialophosphoprotein-related
30211539	5	Pavir.Ia01641.1	0.136	-0.13085	-0.04	-0.09085	0.938969	AT4G15900.1	pleiotropic regulatory locus 1
30211554	4	Pavir.Ia00554.1	0.8359	0.04236	-0.04	0.08236	1.05875	AT5G20950.1	Glycosyl hydrolase family protein
30211577	1	Pavir.Ia01779.1	0.718	-0.2334	-0.04	-0.1934	0.874542	AT5G43850.1	RmlC-like cupins superfamily protein
30211583	1	Pavir.Ia01564.1	0.9007	0.03024	-0.04	0.07024	1.04989	AT4G04950.1	thioredoxin family protein
30211606	3	Pavir.Ia02271.1	0.0558	-0.3912	-0.04	-0.3512	0.783932	AT1G26850.2	S-adenosyl-L-methionine-dependent methyltransferases superfamily protein
30211636	8	Pavir.Ia03602.1	0.1214	0.1905	-0.04	0.2305	1.17324	AT3G55990.1	Plant protein of unknown function (DUF828)
30211637	2	Pavir.Ia02187.1	0.9988	-0.0005432	-0.04	0.0394568	1.02773	AT1G65680.1	expansin B2
30211640	3	Pavir.Ia00007.1	0.252	-0.1256	-0.04	-0.0856	0.942393	AT1G21680.1	DPP6 N-terminal domain-like protein
30211642	2	Pavir.Ia00199.1	0.9185	-0.03371	-0.04	0.00629	1.00437	AT4G36940.1	nicotinate phosphoribosyltransferase 1
30211655	7	Pavir.Ia00387.1	0.2779	-0.1278	-0.04	-0.0878	0.940957	AT1G13950.1	eukaryotic elongation factor 5A-1
30211661	2	Pavir.Ia00903.1	0.262	-0.3621	-0.04	-0.3221	0.799905	AT5G06660.1	Protein of unknown function DUF106, transmembrane
30211698	2	Pavir.Ia04370.1	0.935	-0.01626	-0.04	0.02374	1.01659	AT2G26280.1	CTC-interacting domain 7
30211712	10	Pavir.Ia03843.1	0.067	0.2097	-0.04	0.2497	1.18896	AT2G29560.1	cytosolic enolase
30211720	1	Pavir.Ia02582.1	0.4488	0.1356	-0.04	0.1756	1.12943	AT1G72390.1
30211741	16	Pavir.Ia02658.1	0.0755	0.1818	-0.04	0.2218	1.16619
30211751	2	Pavir.Ia00081.1	0.344	0.1504	-0.04	0.1904	1.14108	AT1G09020.1	homolog of yeast sucrose nonfermenting 4
30211752	1	Pavir.Ia02585.1	0.2905	-0.8332	-0.04	-0.7932	0.577063	AT1G72320.1	pumilio 23
30211767	1	Pavir.Ia00823.1	0.3289	0.2606	-0.04	0.3006	1.23166	AT5G49690.1	UDP-Glycosyltransferase superfamily protein
30211769	1	Pavir.Ia04455.1	0.4781	0.4881	-0.04	0.5281	1.44203	AT1G09795.1	ATP phosphoribosyl transferase 2
30211791	3	Pavir.Ia00853.1	0.7977	0.1223	-0.04	0.1623	1.11907	AT3G18480.1	CCAAT-displacement protein alternatively spliced product
30211799	1	Pavir.Ia03821.1	0.3182	0.4593	-0.04	0.4993	1.41353	AT5G18110.1	novel cap-binding protein
30211808	3	Pavir.Ia04670.1	0.1275	-0.2681	-0.04	-0.2281	0.853759	AT5G15470.1	galacturonosyltransferase 14
30211809	3	Pavir.Ia02189.1	0.8871	-0.04186	-0.04	-0.00186	0.998712	AT1G02080.2	transcription regulators
30211812	8	Pavir.Ia00240.1	0.719	-0.06642	-0.04	-0.02642	0.981854	AT5G28050.1	Cytidine/deoxycytidylate deaminase family protein
30211814	1	Pavir.Ia03588.1	0.9417	-0.01484	-0.04	0.02516	1.01759	AT3G08970.1	DNAJ heat shock N-terminal domain-containing protein
30211819	3	Pavir.Ia03498.1	0.3188	0.1884	-0.04	0.2284	1.17153	AT4G17870.1	Polyketide cyclase/dehydrase and lipid transport superfamily protein
30211841	6	Pavir.Ia00434.1	0.0031	0.29079	-0.04	0.33079	1.2577	AT3G43980.1	Ribosomal protein S14p/S29e family protein
30211846	1	Pavir.Ia00095.1	0.6746	0.1355	-0.04	0.1755	1.12936	AT3G45900.1	Ribonuclease P protein subunit P38-related
30211892	1	Pavir.Ia02369.1	0.5653	-0.4136	-0.04	-0.3736	0.771854	AT3G51430.1	Calcium-dependent phosphotriesterase superfamily protein
30211893	4	Pavir.Ia02476.1	0.554	-0.06972	-0.04	-0.02972	0.97961	AT3G56720.1
30211917	4	Pavir.Ia04347.1	0.4827	-0.1086	-0.04	-0.0686	0.953563	AT5G12040.1	Nitrilase/cyanide hydratase and apolipoprotein N-acyltransferase family protein
30211927	4	Pavir.Ia03728.1	0.0628	0.3671	-0.04	0.4071	1.32602	AT1G17020.1	senescence-related gene 1
30211931	1	Pavir.Ia02891.1	0.1241	-0.8516	-0.04	-0.8116	0.56975	AT4G35230.1	BR-signaling kinase 1
30211961	4	Pavir.Ia01726.1	0.5477	0.1283	-0.04	0.1683	1.12373	AT1G61870.1	pentatricopeptide repeat 336
30211962	1	Pavir.Ia01930.1	0.221	-0.712	-0.04	-0.672	0.627636
30211966	5	Pavir.Ia02521.1	0.7728	0.03298	-0.04	0.07298	1.05189	AT5G61190.1	putative endonuclease or glycosyl hydrolase with C2H2-type zinc finger domain
30211985	6	Pavir.Ia04577.1	0.0007	0.36689	-0.04	0.40689	1.32582	AT3G48750.1	cell division control 2
30211987	1	Pavir.Ia03493.1	0.0456	-0.6872	-0.04	-0.6472	0.638518	AT5G65940.1	beta-hydroxyisobutyryl-CoA hydrolase 1
30211990	9	Pavir.Ia03501.1	0.9045	-0.01366	-0.04	0.02634	1.01843	AT5G46800.1	Mitochondrial substrate carrier family protein
30212031	2	Pavir.Ia00887.1	0.7223	-0.1487	-0.04	-0.1087	0.927423	AT4G36630.1	Vacuolar sorting protein 39
30212033	13	Pavir.Ia04676.1	0.2673	-0.09405	-0.04	-0.05405	0.963229	AT3G02090.1	Insulinase (Peptidase family M16) protein
30212034	5	Pavir.Ia01357.1	0.0436	0.4586	-0.04	0.4986	1.41284	AT5G37690.1	SGNH hydrolase-type esterase superfamily protein
30212050	27	Pavir.Ia02756.3	0.1919	0.1364	-0.04	0.1764	1.13006	AT2G17980.1	Sec1/munc18-like (SM) proteins superfamily
30212081	1	Pavir.Ia01119.1	0.4109	-0.1259	-0.04	-0.0859	0.942197	AT5G18230.1	transcription regulator NOT2/NOT3/NOT5 family protein
30212091	2	Pavir.Ia03657.1	0.882	0.06257	-0.04	0.10257	1.07368	AT3G07630.1	arogenate dehydratase 2
30212103	1	Pavir.Ia00841.1	0.1611	-0.3827	-0.04	-0.3427	0.788564	AT3G17970.1	translocon at the outer membrane of chloroplasts 64-III
30212142	1	Pavir.Ia01787.1	0.6789	0.09009	-0.04	0.13009	1.09436	AT3G28480.1	Oxoglutarate/iron-dependent oxygenase
30212147	1	Pavir.Ia00444.1	0.8671	-0.1335	-0.04	-0.0935	0.937246	AT1G75210.1	HAD-superfamily hydrolase, subfamily IG, 5\'-nucleotidase
30212157	2	Pavir.Ia01656.1	0.0534	-0.2602	-0.04	-0.2202	0.858446	AT3G23490.1	cyanase
30212173	9	Pavir.Ia00175.1	0.5006	-0.1313	-0.04	-0.0913	0.938677	AT3G14750.1
30212180	2	Pavir.Ia00865.1	0.4568	-0.6912	-0.04	-0.6512	0.63675	AT3G10050.1	L-O-methylthreonine resistant 1
30212184	2	Pavir.Ia04918.1	0.355	0.3994	-0.04	0.4394	1.35604	AT5G62440.1	Protein of unknown function (DUF3223)
30212221	9	Pavir.Ia04501.1	0.0621	-0.18256	-0.04	-0.14256	0.90591	AT4G28390.1	ADP/ATP carrier 3
30212234	6	Pavir.Ia04697.1	0.8384	-0.04001	-0.04	-1e-05	0.999993	AT5G63840.1	Glycosyl hydrolases family 31 protein
30212237	1	Pavir.Ia02112.1	0.4421	0.1086	-0.04	0.1486	1.10849	AT5G26110.1	Protein kinase superfamily protein
30212270	3	Pavir.Ia01291.1	0.0529	-0.254	-0.04	-0.214	0.862144	AT1G47710.1	Serine protease inhibitor (SERPIN) family protein
30212273	1	Pavir.Ia00185.1	0.2426	-0.5867	-0.04	-0.5467	0.684584	AT3G55120.1	Chalcone-flavanone isomerase family protein
30212303	8	Pavir.Ia00277.1	0.0861	0.3857	-0.04	0.4257	1.34322	AT3G09350.1	Fes1A
30212304	2	Pavir.Ia00526.1	0.7471	-0.2136	-0.04	-0.1736	0.886627	AT5G60920.1	COBRA-like extracellular glycosyl-phosphatidyl inositol-anchored protein family
30212317	1	Pavir.Ia00724.1	0.2825	0.1529	-0.04	0.1929	1.14306	AT4G07990.1	Chaperone DnaJ-domain superfamily protein
30212375	1	Pavir.Ia04429.1	0.6302	0.3987	-0.04	0.4387	1.35538	AT1G04520.1	plasmodesmata-located protein 2
30212378	11	Pavir.Ia00280.1	0.6854	0.04161	-0.04	0.08161	1.0582	AT2G37660.1	NAD(P)-binding Rossmann-fold superfamily protein
30212379	1	Pavir.Ia00498.1	0.9635	-0.04045	-0.04	-0.00045	0.999688	AT5G63890.1	histidinol dehydrogenase
30212394	2	Pavir.Ia01134.1	0.3063	-1.256	-0.04	-1.216	0.430475	AT3G15790.1	methyl-CPG-binding domain 11
30212405	2	Pavir.Ia02811.1	0.1323	-0.536	-0.04	-0.496	0.70907	AT5G06720.1	peroxidase 2
30212425	1	Pavir.Ia00761.1	0.3587	0.3179	-0.04	0.3579	1.28156	AT2G01490.1	phytanoyl-CoA dioxygenase (PhyH) family protein
30212429	1	Pavir.Ia03674.1	0.7067	0.1087	-0.04	0.1487	1.10857	AT2G25430.1	epsin N-terminal homology (ENTH) domain-containing protein / clathrin assembly protein-related
30212434	3	Pavir.Ia01520.1	0.4133	0.1996	-0.04	0.2396	1.18067	AT4G36195.1	Serine carboxypeptidase S28 family protein
30212435	1	Pavir.Ia00020.1	0.5257	0.2396	-0.04	0.2796	1.21386	AT2G33255.1	Haloacid dehalogenase-like hydrolase (HAD) superfamily protein
30212453	2	Pavir.Ia00971.1	0.2044	-0.326	-0.04	-0.286	0.820173	AT5G04280.1	RNA-binding (RRM/RBD/RNP motifs) family protein with retrovirus zinc finger-like domain
30212506	4	Pavir.Ia00861.1	0.3238	-0.1528	-0.04	-0.1128	0.924791	AT1G23260.1	MMS ZWEI homologue 1
30212510	5	Pavir.Ia03194.1	0.1553	0.315	-0.04	0.355	1.27899	AT1G54140.1	TATA binding protein associated factor 21kDa subunit
30212523	2	Pavir.Ia03147.1	0.7395	-0.1471	-0.04	-0.1071	0.928452	AT5G39850.1	Ribosomal protein S4
30212561	3	Pavir.Ia00732.1	0.0886	0.4391	-0.04	0.4791	1.39387	AT5G66290.1
30212584	5	Pavir.Ia04679.1	0.8347	-0.03792	-0.04	0.00208	1.00144	AT5G07980.1	dentin sialophosphoprotein-related
30212606	1	Pavir.Ia02215.1	0.4022	0.3168	-0.04	0.3568	1.28058	AT5G47390.1	myb-like transcription factor family protein
30212609	6	Pavir.Ia03419.1	0.9921	-0.001654	-0.04	0.038346	1.02694	AT3G08860.1	PYRIMIDINE 4
30212618	7	Pavir.Ia01064.1	0.2654	0.1399	-0.04	0.1799	1.13281	AT2G30880.1	Pleckstrin homology (PH) domain-containing protein
30212629	5	Pavir.Ia04259.1	0.6257	-0.1007	-0.04	-0.0607	0.958799	AT5G66100.1	winged-helix DNA-binding transcription factor family protein
30212639	1	Pavir.Ia01620.1	0.0208	-0.4528	-0.04	-0.4128	0.751164	AT2G19860.1	hexokinase 2
30212665	3	Pavir.Ia02557.1	0.5344	-0.1228	-0.04	-0.0828	0.944223	AT5G51840.1
30212669	1	Pavir.Ia00651.1	0.5646	0.3013	-0.04	0.3413	1.2669	AT5G49720.1	glycosyl hydrolase 9A1
30212676	1	Pavir.Ia01172.1	0.0836	-1.1745	-0.04	-1.1345	0.455493	AT3G46780.1	plastid transcriptionally active 16
30212680	1	Pavir.Ia04941.1	0.868	-0.2301	-0.04	-0.1901	0.876545
30212699	3	Pavir.Ia00205.1	0.8738	-0.05475	-0.04	-0.01475	0.989828	AT2G35460.1	Late embryogenesis abundant (LEA) hydroxyproline-rich glycoprotein family
30212700	2	Pavir.Ia04367.1	0.9879	-0.006514	-0.04	0.033486	1.02348	AT1G17420.1	lipoxygenase 3
30212707	7	Pavir.Ia03683.1	0.8287	-0.02448	-0.04	0.01552	1.01082	AT4G21860.1	methionine sulfoxide reductase B 2
30212713	3	Pavir.Ia03414.1	0.1172	0.1957	-0.04	0.2357	1.17748	AT3G16760.1	Tetratricopeptide repeat (TPR)-like superfamily protein
30212718	3	Pavir.Ia02878.1	0.6873	-0.08029	-0.04	-0.04029	0.972459	AT2G33700.1	Protein phosphatase 2C family protein
30212722	3	Pavir.Ia04266.1	0.2806	-0.2911	-0.04	-0.2511	0.840256	AT4G35630.1	phosphoserine aminotransferase
30212728	3	Pavir.Ia03069.1	0.4336	0.1035	-0.04	0.1435	1.10458	AT3G28450.1	Leucine-rich repeat protein kinase family protein
30212738	3	Pavir.Ia00843.1	0.8343	0.02704	-0.04	0.06704	1.04757	AT2G01490.1	phytanoyl-CoA dioxygenase (PhyH) family protein
30212741	18	Pavir.Ia00159.1	0.8553	0.01419	-0.04	0.05419	1.03828	AT2G44160.1	methylenetetrahydrofolate reductase 2
30212771	2	Pavir.Ia04730.1	0.9711	-0.01067	-0.04	0.02933	1.02054	AT2G20330.1	Transducin/WD40 repeat-like superfamily protein
30212774	1	Pavir.Ia00139.1	0.5379	-0.2247	-0.04	-0.1847	0.879832	AT2G40510.1	Ribosomal protein S26e family protein
30212786	2	Pavir.Ia03539.1	0.0579	-0.2281	-0.04	-0.1881	0.877761	AT3G16910.1	acyl-activating enzyme 7
30212795	2	Pavir.Ia01836.1	0.0667	0.6335	-0.04	0.6735	1.59494	AT2G38940.1	phosphate transporter 1;4
30212801	6	Pavir.Ia00212.1	0.0006	-0.5933	-0.04	-0.5533	0.68146	AT1G50940.1	electron transfer flavoprotein alpha
30212803	6	Pavir.Ia01758.1	0.1047	-0.2403	-0.04	-0.2003	0.87037	AT5G15270.1	RNA-binding KH domain-containing protein
30212804	1	Pavir.Ia02406.1	0.25	-0.2807	-0.04	-0.2407	0.846335	AT3G16620.1	translocon outer complex protein 120
30212809	3	Pavir.Ia03232.1	0.2549	-0.1363	-0.04	-0.0963	0.935429	AT2G27920.1	serine carboxypeptidase-like 51
30212818	1	Pavir.Ia03565.1	0.9145	-0.1467	-0.04	-0.1067	0.92871	AT4G29040.1	regulatory particle AAA-ATPase 2A
30212822	5	Pavir.Ia03713.1	0.2606	-0.3704	-0.04	-0.3304	0.795316	AT1G05190.1	Ribosomal protein L6 family
30212853	2	Pavir.Ia00104.1	0.3335	0.2085	-0.04	0.2485	1.18797	AT4G04860.1	DERLIN-2.2
30212873	1	Pavir.Ia04204.1	0.7624	0.1836	-0.04	0.2236	1.16764	AT5G03340.1	ATPase, AAA-type, CDC48 protein
30212909	14	Pavir.Ia02970.1	0.6095	-0.05581	-0.04	-0.01581	0.989101	AT1G17020.1	senescence-related gene 1
30212912	11	Pavir.Ia04272.1	0.0609	-0.2728	-0.04	-0.2328	0.850982	AT3G22430.1
30212933	2	Pavir.Ia00075.1	0.9941	-0.001835	-0.04	0.038165	1.02681	AT1G50510.1	indigoidine synthase A family protein
30212938	3	Pavir.Ia00950.1	0.1728	-0.2298	-0.04	-0.1898	0.876727	AT5G62670.1	H(+)-ATPase 11
30212939	1	Pavir.Ia01181.1	0.668	0.3479	-0.04	0.3879	1.30849	AT5G17840.1	DnaJ/Hsp40 cysteine-rich domain superfamily protein
30212941	1	Pavir.Ia01144.1	0.5293	-0.1327	-0.04	-0.0927	0.937766	AT3G44150.1
30212945	1	Pavir.Ia00044.1	0.8279	0.04456	-0.04	0.08456	1.06036	AT3G01980.4	NAD(P)-binding Rossmann-fold superfamily protein
30212997	1	Pavir.Ia04617.1	0.035	-0.6903	-0.04	-0.6503	0.637148	AT3G17910.1	Surfeit locus 1 cytochrome c oxidase biogenesis protein
30213001	2	Pavir.Ia00097.1	0.4824	-0.4128	-0.04	-0.3728	0.772282	AT1G61010.3	cleavage and polyadenylation specificity factor 73-I
30213028	2	Pavir.Ia00255.1	0.2779	-0.1259	-0.04	-0.0859	0.942197	AT1G07230.1	non-specific phospholipase C1
30213033	13	Pavir.Ia01514.1	0.9716	-0.003603	-0.04	0.036397	1.02555	AT5G54900.1	RNA-binding protein 45A
30213037	2	Pavir.Ia02163.1	0.3308	0.1385	-0.04	0.1785	1.13171	AT4G22460.1	Bifunctional inhibitor/lipid-transfer protein/seed storage 2S albumin superfamily protein
30213045	1	Pavir.Ia01381.1	0.4248	-0.4731	-0.04	-0.4331	0.740669	AT2G26680.1
30213049	2	Pavir.Ia03627.1	0.6817	-0.1274	-0.04	-0.0874	0.941217	AT5G02740.1	Ribosomal protein S24e family protein
30213054	1	Pavir.Ia03375.1	0.8469	-0.05729	-0.04	-0.01729	0.988087	AT5G01310.1	APRATAXIN-like
30213056	1	Pavir.Ia04271.1	0.0626	0.5201	-0.04	0.5601	1.47437	AT5G56460.1	Protein kinase superfamily protein
30213073	4	Pavir.Ia00858.1	0.193	-0.2502	-0.04	-0.2102	0.864417	AT1G62020.1	Coatomer, alpha subunit
30213093	3	Pavir.Ia01594.1	0.2436	-0.3014	-0.04	-0.2614	0.834278	AT1G17840.1	white-brown complex homolog protein 11
30213095	4	Pavir.Ia02070.1	0.3969	-0.1157	-0.04	-0.0757	0.948882	AT4G09670.1	Oxidoreductase family protein
30213100	4	Pavir.Ia00229.1	0.0394	-0.21581	-0.04	-0.17581	0.88527	AT3G06580.1	Mevalonate/galactokinase family protein
30213102	1	Pavir.Ia00013.1	0.5609	0.2017	-0.04	0.2417	1.18239	AT1G03860.3	prohibitin 2
30213104	6	Pavir.Ia03661.1	0.7477	-0.04097	-0.04	-0.00097	0.999328	AT1G78570.1	rhamnose biosynthesis 1
30213121	2	Pavir.Ia01848.1	0.163	0.2137	-0.04	0.2537	1.19226	AT2G37020.1	Translin family protein
30213125	2	Pavir.Ia03094.1	0.616	-0.09972	-0.04	-0.05972	0.95945	AT3G15730.1	phospholipase D alpha 1
30213126	1	Pavir.Ia04480.1	0.341	0.3373	-0.04	0.3773	1.29891	AT2G37250.1	adenosine kinase
30213160	4	Pavir.Ia03949.1	0.1872	-0.2937	-0.04	-0.2537	0.838743	AT1G14710.2	hydroxyproline-rich glycoprotein family protein
30213169	3	Pavir.Ia01747.1	0.1708	0.3182	-0.04	0.3582	1.28183
30213193	1	Pavir.Ia04165.1	0.4171	-0.2527	-0.04	-0.2127	0.862921	AT4G34215.2	Domain of unknown function (DUF303)
30213207	7	Pavir.Ia02656.1	0.7873	0.06071	-0.04	0.10071	1.0723	AT4G27670.1	heat shock protein 21
30213210	2	Pavir.Ia02186.1	0.4067	0.2441	-0.04	0.2841	1.21765	AT1G65680.1	expansin B2
30213219	1	Pavir.Ia01122.1	0.2464	-0.6082	-0.04	-0.5682	0.674458	AT4G32915.1
30213222	3	Pavir.Ia02671.1	0.8394	0.07115	-0.04	0.11115	1.08009	AT4G19150.1	Ankyrin repeat family protein
30213224	1	Pavir.Ia02415.1	0.0678	-0.19017	-0.04	-0.15017	0.901144	AT5G38710.1	Methylenetetrahydrofolate reductase family protein
30213249	5	Pavir.Ia00356.1	0.8068	-0.04149	-0.04	-0.00149	0.998968	AT2G34250.2	SecY protein transport family protein
30213251	1	Pavir.Ia00849.1	0.7492	0.06788	-0.04	0.10788	1.07764	AT1G13330.1	Arabidopsis Hop2 homolog
30213262	1	Pavir.Ia02963.1	0.6808	-0.561	-0.04	-0.521	0.696889	AT4G10790.1	UBX domain-containing protein
30213289	7	Pavir.Ia03327.1	0.0012	-0.7586	-0.04	-0.7186	0.607687	AT4G11290.1	Peroxidase superfamily protein
30213293	1	Pavir.Ia00528.1	0.5247	-0.4229	-0.04	-0.3829	0.766894	AT1G26340.1	cytochrome B5 isoform A
30213306	1	Pavir.Ia01233.1	0.2421	-0.6986	-0.04	-0.6586	0.633493	AT1G47720.1	Primosome PriB/single-strand DNA-binding
30213308	1	Pavir.Ia00646.1	0.8353	-0.06628	-0.04	-0.02628	0.981949	AT5G10860.1	Cystathionine beta-synthase (CBS) family protein
30213318	2	Pavir.Ia04337.1	0.3814	-0.1047	-0.04	-0.0647	0.956144	AT5G19350.1	RNA-binding (RRM/RBD/RNP motifs) family protein
30213324	1	Pavir.Ia03191.1	0.21	0.9	-0.04	0.94	1.91853	AT1G19110.1	inter-alpha-trypsin inhibitor heavy chain-related
30213336	1	Pavir.Ia02814.1	0.0344	-3.437	-0.04	-3.397	0.0949295	AT5G17820.1	Peroxidase superfamily protein
30213356	8	Pavir.Ia02104.1	0.159	0.11594	-0.04	0.15594	1.11415	AT5G09810.1	actin 7
30213359	1	Pavir.Ia01002.1	0.7843	0.2526	-0.04	0.2926	1.22485	AT2G16270.1
30213377	1	Pavir.Ia02424.1	0.9143	-0.07597	-0.04	-0.03597	0.975376	AT3G58670.1	Protein of unknown function (DUF1637)
30213391	1	Pavir.Ia01718.1	0.3538	-1.238	-0.04	-1.198	0.435879	AT5G40380.1	cysteine-rich RLK (RECEPTOR-like protein kinase) 42
30213428	2	Pavir.Ia03826.1	0.0102	0.547	-0.04	0.587	1.50212	AT5G22080.1	Chaperone DnaJ-domain superfamily protein
30213433	26	Pavir.Ia01436.1	0.0185	0.13121	-0.04	0.17121	1.126	AT5G15650.1	reversibly glycosylated polypeptide 2
30213435	1	Pavir.Ia00131.1	0.9749	-0.006996	-0.04	0.033004	1.02314	AT4G15415.1	Protein phosphatase 2A regulatory B subunit family protein
30213452	1	Pavir.Ia03788.1	0.5873	-0.1978	-0.04	-0.1578	0.896391
30213483	1	Pavir.Ia02237.1	0.75	-0.05306	-0.04	-0.01306	0.990988	AT2G44730.1	Alcohol dehydrogenase transcription factor Myb/SANT-like family protein
30213491	3	Pavir.Ia01310.1	0.8603	0.02003	-0.04	0.06003	1.04249	AT3G50590.1	Transducin/WD40 repeat-like superfamily protein
30213495	1	Pavir.Ia01347.1	0.9322	0.04917	-0.04	0.08917	1.06376	AT3G62010.1
30213505	16	Pavir.Ia03265.1	0.0012	-0.25912	-0.04	-0.21912	0.859089	AT3G01120.1	Pyridoxal phosphate (PLP)-dependent transferases superfamily protein
30213516	4	Pavir.Ia00561.1	0.716	-0.06838	-0.04	-0.02838	0.980521	AT5G32450.1	RNA binding (RRM/RBD/RNP motifs) family protein
30213522	2	Pavir.Ia03189.1	0.0744	-0.8859	-0.04	-0.8459	0.556364	AT1G19140.2
30213556	2	Pavir.Ia04092.1	0.8165	-0.1176	-0.04	-0.0776	0.947633	AT3G25290.1	Auxin-responsive family protein
30213560	2	Pavir.Ia00746.1	0.2832	0.4463	-0.04	0.4863	1.40085	AT3G49660.1	Transducin/WD40 repeat-like superfamily protein
30213582	2	Pavir.Ia04650.1	0.3023	-0.4551	-0.04	-0.4151	0.749968	AT4G37640.1	calcium ATPase 2
30213612	2	Pavir.Ia03462.1	0.1607	0.6804	-0.04	0.7204	1.64764	AT3G10740.1	alpha-L-arabinofuranosidase 1
30213616	1	Pavir.Ia00904.1	0.3041	0.6165	-0.04	0.6565	1.57625	AT1G54690.1	gamma histone variant H2AX
30213617	5	Pavir.Ia00883.1	0.8062	-0.03088	-0.04	0.00912	1.00634	AT4G17720.1	RNA-binding (RRM/RBD/RNP motifs) family protein
30213622	7	Pavir.Ia00953.1	0.6218	0.1238	-0.04	0.1638	1.12023	AT5G62680.1	Major facilitator superfamily protein
30213633	9	Pavir.Ia00254.1	0.192	-0.18	-0.04	-0.14	0.907519	AT1G19530.1
30213644	7	Pavir.Ia03586.1	0.9737	0.004451	-0.04	0.044451	1.03129	AT1G07110.1	fructose-2,6-bisphosphatase
30213665	1	Pavir.Ia00114.1	0.1253	0.4486	-0.04	0.4886	1.40308	AT5G09900.1	26S proteasome regulatory subunit, putative (RPN5)
30213680	3	Pavir.Ia02973.1	0.8701	-0.038	-0.04	0.002	1.00139	AT4G34890.1	xanthine dehydrogenase 1
30213681	1	Pavir.Ia03620.1	0.3949	-0.2576	-0.04	-0.2176	0.859995	AT5G13510.1	Ribosomal protein L10 family protein
30213693	2	Pavir.Ia03714.1	0.913	-0.02382	-0.04	0.01618	1.01128	AT5G13810.1	Glutaredoxin family protein
30213695	1	Pavir.Ia00862.1	0.9816	0.006336	-0.04	0.046336	1.03264	AT1G48480.1	receptor-like kinase 1
30213699	3	Pavir.Ia01666.1	0.535	0.2895	-0.04	0.3295	1.25658	AT1G71220.2	UDP-glucose:glycoprotein glucosyltransferases;transferases, transferring hexosyl groups;transferases, transferring glycosyl groups
30213703	1	Pavir.Ia00564.1	0.1579	-0.4016	-0.04	-0.3616	0.778301	AT4G16440.1	ferredoxin hydrogenases
30213710	1	Pavir.Ia01093.1	0.755	0.1675	-0.04	0.2075	1.15469	AT1G60995.1
30213725	1	Pavir.Ia01588.1	0.8557	-0.07813	-0.04	-0.03813	0.973917	AT3G60600.1	vesicle associated protein
30213731	2	Pavir.Ia03933.1	0.0829	-0.2393	-0.04	-0.1993	0.870973	AT4G34980.1	subtilisin-like serine protease 2
30213740	1	Pavir.Ia01238.1	0.3802	0.4971	-0.04	0.5371	1.45105	AT1G08780.1	ABI3-interacting protein 3
30213762	4	Pavir.Ia00059.1	0.4203	0.1655	-0.04	0.2055	1.15309	AT5G43310.2	COP1-interacting protein-related
30213777	13	Pavir.Ia03032.1	0.8151	-0.02521	-0.04	0.01479	1.0103	AT2G36800.1	don-glucosyltransferase 1
30213808	5	Pavir.Ia01597.1	0.3951	-0.2069	-0.04	-0.1669	0.890755	AT1G06950.1	translocon at the inner envelope membrane of chloroplasts 110
30213863	4	Pavir.Ia03573.1	0.2349	0.4124	-0.04	0.4524	1.36831	AT2G40290.1	Eukaryotic translation initiation factor 2 subunit 1
30213866	39	Pavir.Ia03670.1	0.4327	-0.07481	-0.04	-0.03481	0.97616	AT3G12580.1	heat shock protein 70
30213873	18	Pavir.Ia04185.1	0.0483	-0.2287	-0.04	-0.1887	0.877396	AT3G13460.1	evolutionarily conserved C-terminal region 2
30213881	1	Pavir.Ia00551.1	0.4091	-0.4944	-0.04	-0.4544	0.729814	AT3G58470.1	nucleic acid binding;methyltransferases
30213895	3	Pavir.Ia00520.1	0.8699	0.04426	-0.04	0.08426	1.06014	AT5G39040.1	transporter associated with antigen processing protein 2
30213923	1	Pavir.Ia03425.1	0.4945	0.2034	-0.04	0.2434	1.18378	AT3G10670.1	non-intrinsic ABC protein 7
30213934	2	Pavir.Ia01020.1	0.7572	0.08933	-0.04	0.12933	1.09379	AT4G34460.1	GTP binding protein beta 1
30213949	2	Pavir.Ia03566.1	0.376	0.2391	-0.04	0.2791	1.21344	AT2G38480.1	Uncharacterised protein family (UPF0497)
30213955	8	Pavir.Ia00785.1	0.5011	0.07653	-0.04	0.11653	1.08412	AT3G22630.1	20S proteasome beta subunit D1
30213971	15	Pavir.Ia00558.1	0.2712	0.08845	-0.04	0.12845	1.09312	AT5G20950.2	Glycosyl hydrolase family protein
30213976	6	Pavir.Ia00546.1	0.1086	-0.2035	-0.04	-0.1635	0.892856	AT5G22020.1	Calcium-dependent phosphotriesterase superfamily protein
30213980	4	Pavir.Ia00771.1	0.4884	0.1107	-0.04	0.1507	1.11011	AT1G67350.1
30213989	1	Pavir.Ia02751.1	0.8876	-0.04778	-0.04	-0.00778	0.994622	AT5G60660.1	plasma membrane intrinsic protein 2;4
30213995	5	Pavir.Ia00867.1	0.4104	-0.2172	-0.04	-0.1772	0.884418	AT1G14830.1	DYNAMIN-like 1C
30214027	2	Pavir.Ia00495.1	0.7412	-0.1477	-0.04	-0.1077	0.928066	AT1G56000.1	FAD/NAD(P)-binding oxidoreductase family protein
30214053	10	Pavir.Ia04746.1	0.1117	0.14631	-0.04	0.18631	1.13785	AT2G33150.1	peroxisomal 3-ketoacyl-CoA thiolase 3
30214058	2	Pavir.Ia01630.1	0.4183	0.2297	-0.04	0.2697	1.20556	AT4G30480.2	Tetratricopeptide repeat (TPR)-like superfamily protein
30214060	3	Pavir.Ia02668.1	0.6135	-0.07991	-0.04	-0.03991	0.972716	AT2G14835.2	RING/U-box superfamily protein
30214082	11	Pavir.Ia02913.1	0.703	-0.05066	-0.04	-0.01066	0.992638	AT4G01370.1	MAP kinase 4
30214087	5	Pavir.Ia03444.1	0.2258	-0.2504	-0.04	-0.2104	0.864298	AT2G39050.1	hydroxyproline-rich glycoprotein family protein
30214088	15	Pavir.Ia03444.2	0.0014	-0.3438	-0.04	-0.3038	0.810116	AT2G39050.1	hydroxyproline-rich glycoprotein family protein
30214091	1	Pavir.Ia02772.1	0.7432	0.08399	-0.04	0.12399	1.08974	AT2G45620.1	Nucleotidyltransferase family protein
30214122	1	Pavir.Ia02148.1	0.2223	1.2075	-0.04	1.2475	2.3743	AT5G47100.1	calcineurin B-like protein 9
30214137	1	Pavir.Ia01596.1	0.3065	-0.6105	-0.04	-0.5705	0.673383	AT5G08370.1	alpha-galactosidase 2
30214170	8	Pavir.Ia01067.1	0.5322	0.0607	-0.04	0.1007	1.07229	AT1G58370.1	glycosyl hydrolase family 10 protein / carbohydrate-binding domain-containing protein
30214173	3	Pavir.Ia04002.1	0.9162	0.03	-0.04	0.07	1.04972	AT5G42650.1	allene oxide synthase
30214178	1	Pavir.Ia00908.1	0.8226	-0.07633	-0.04	-0.03633	0.975132	AT5G42720.1	Glycosyl hydrolase family 17 protein
30214191	6	Pavir.Ia03880.1	0.0035	-0.452	-0.04	-0.412	0.751581	AT4G37870.1	phosphoenolpyruvate carboxykinase 1
30214198	38	Pavir.Ia02723.1	<.0001	-0.84789	-0.04	-0.80789	0.571217	AT2G03440.1	nodulin-related protein 1
30214209	1	Pavir.Ia00847.1	0.8509	-0.069	-0.04	-0.029	0.980099	AT1G65820.1	microsomal glutathione s-transferase, putative
30214239	1	Pavir.Ia00011.1	0.2282	-0.5163	-0.04	-0.4763	0.718819	AT1G72170.1	Domain of unknown function (DUF543)
30214243	2	Pavir.Ia00202.1	0.0493	0.8069	-0.04	0.8469	1.79863	AT3G02875.1	Peptidase M20/M25/M40 family protein
30214250	1	Pavir.Ia00083.1	0.1195	0.8218	-0.04	0.8618	1.8173	AT1G48050.1	Ku80 family protein
30214257	1	Pavir.Ia03523.1	0.3821	-0.314	-0.04	-0.274	0.827023	AT1G56430.1	nicotianamine synthase 4
30214264	1	Pavir.Ia01019.1	0.3581	0.2655	-0.04	0.3055	1.23585	AT3G46940.1	DUTP-PYROPHOSPHATASE-LIKE 1
30214267	4	Pavir.Ia01160.1	0.884	-0.03164	-0.04	0.00836	1.00581	AT5G46180.1	ornithine-delta-aminotransferase
30214274	3	Pavir.Ia02273.1	0.0874	-0.535	-0.04	-0.495	0.709562	AT2G44870.1
30214279	1	Pavir.Ia04323.1	0.3819	-0.2278	-0.04	-0.1878	0.877943	AT1G69780.1	Homeobox-leucine zipper protein family
30214285	2	Pavir.Ia00570.1	0.7182	0.113	-0.04	0.153	1.11188	AT3G13460.1	evolutionarily conserved C-terminal region 2
30214305	3	Pavir.Ia01727.1	0.7054	0.1322	-0.04	0.1722	1.12678	AT3G19840.1	pre-mRNA-processing protein 40C
30214310	2	Pavir.Ia04447.1	0.9099	0.05394	-0.04	0.09394	1.06728	AT5G23590.2	DNAJ heat shock N-terminal domain-containing protein
30214315	1	Pavir.Ia03512.1	0.5864	0.1857	-0.04	0.2257	1.16934	AT4G17880.1	Basic helix-loop-helix (bHLH) DNA-binding family protein
30214335	4	Pavir.Ia00465.1	0.0647	-0.3788	-0.04	-0.3388	0.790699	AT5G66760.1	succinate dehydrogenase 1-1
30214341	6	Pavir.Ia03706.1	0.0762	0.3718	-0.04	0.4118	1.33034	AT1G56110.1	homolog of nucleolar protein NOP56
30214347	1	Pavir.Ia03807.1	0.7397	0.2404	-0.04	0.2804	1.21453	AT2G18790.1	phytochrome B
30214349	2	Pavir.Ia01627.1	0.964	-0.02167	-0.04	0.01833	1.01279	AT5G23290.1	prefoldin 5
30214364	1	Pavir.Ia02688.1	0.6208	0.245	-0.04	0.285	1.21841	AT4G19006.1	Proteasome component (PCI) domain protein
30214365	3	Pavir.Ia00997.1	0.632	-0.2591	-0.04	-0.2191	0.859101
30214378	5	Pavir.Ia01933.1	0.0733	-0.2775	-0.04	-0.2375	0.848214	AT4G14570.1	acylaminoacyl-peptidase-related
30214379	1	Pavir.Ia04290.1	0.9547	-0.01622	-0.04	0.02378	1.01662	AT2G16400.1	BEL1-like homeodomain 7
30214381	1	Pavir.Ia01285.1	0.5163	0.07812	-0.04	0.11812	1.08532	AT2G19940.2	oxidoreductases, acting on the aldehyde or oxo group of donors, NAD or NADP as acceptor;copper ion binding
30214385	5	Pavir.Ia01046.1	0.2151	-0.10669	-0.04	-0.06669	0.954826	AT1G76200.1
30214406	19	Pavir.Ia03662.1	0.0005	0.4106	-0.04	0.4506	1.36661	AT2G28760.3	UDP-XYL synthase 6
30214427	1	Pavir.Ia00765.1	0.0055	-0.48064	-0.04	-0.44064	0.736808	AT3G57610.1	adenylosuccinate synthase
30214450	4	Pavir.Ia00475.1	0.0002	0.9195	-0.04	0.9595	1.94464	AT2G31200.1	actin depolymerizing factor 6
30214460	3	Pavir.Ia03947.1	0.9109	0.03653	-0.04	0.07653	1.05448	AT1G14740.1	Protein of unknown function (DUF1423)
30214466	3	Pavir.Ia04276.1	0.0054	0.6809	-0.04	0.7209	1.64821	AT3G51895.1	sulfate transporter 3;1
30214505	1	Pavir.Ia02985.1	0.38	0.4302	-0.04	0.4702	1.3853	AT3G19590.1	Transducin/WD40 repeat-like superfamily protein
30214512	1	Pavir.Ia03469.1	0.726	0.1294	-0.04	0.1694	1.12459	AT3G12250.1	TGACG motif-binding factor 6
30214528	3	Pavir.Ia01338.1	0.3207	-0.3375	-0.04	-0.2975	0.813661	AT3G27690.1	photosystem II light harvesting complex gene 2.3
30214530	12	Pavir.Ia03481.1	0.6083	-0.0742	-0.04	-0.0342	0.976573	AT3G62310.1	RNA helicase family protein
30214544	2	Pavir.Ia01683.1	0.6709	-0.1875	-0.04	-0.1475	0.902814	AT5G43330.1	Lactate/malate dehydrogenase family protein
30214548	1	Pavir.Ia03773.1	0.5135	0.4951	-0.04	0.5351	1.44904	AT5G22040.3
30214559	1	Pavir.Ia04666.1	0.7776	-0.09466	-0.04	-0.05466	0.962821	AT2G03440.1	nodulin-related protein 1
30214564	4	Pavir.Ia03470.1	0.2699	-0.2254	-0.04	-0.1854	0.879405	AT1G09420.1	glucose-6-phosphate dehydrogenase 4
30214573	7	Pavir.Ia03898.1	0.7212	0.05205	-0.04	0.09205	1.06588	AT1G31910.1	GHMP kinase family protein
30214587	1	Pavir.Ia02736.1	0.5666	0.5034	-0.04	0.5434	1.4574	AT1G36160.1	acetyl-CoA carboxylase 1
30214607	4	Pavir.Ia03632.1	0.644	0.06759	-0.04	0.10759	1.07743	AT1G07960.1	PDI-like 5-1
30214609	2	Pavir.Ia02059.1	0.4131	-0.3771	-0.04	-0.3371	0.791631	AT3G09840.1	cell division cycle 48
30214610	1	Pavir.Ia00284.1	0.6848	0.08539	-0.04	0.12539	1.0908	AT2G39630.1	Nucleotide-diphospho-sugar transferases superfamily protein
30214615	2	Pavir.Ia01622.1	0.4601	-0.3408	-0.04	-0.3008	0.811802	AT3G19960.1	myosin 1
30214629	7	Pavir.Ia03483.1	0.6754	-0.08198	-0.04	-0.04198	0.971321	AT4G18440.1	L-Aspartase-like family protein
30214669	25	Pavir.Ia00806.1	0.8645	0.014	-0.04	0.054	1.03814	AT3G22400.1	PLAT/LH2 domain-containing lipoxygenase family protein
30214710	2	Pavir.Ia04000.1	0.7845	0.08152	-0.04	0.12152	1.08788	AT2G16060.1	hemoglobin 1
30214711	12	Pavir.Ia00500.1	0.9961	-0.0005428	-0.04	0.0394572	1.02773	AT4G05390.1	root FNR 1
30214719	7	Pavir.Ia03415.1	0.3965	-0.1223	-0.04	-0.0823	0.944551	AT4G02280.1	sucrose synthase 3
30214732	3	Pavir.Ia04896.1	0.0119	-0.5935	-0.04	-0.5535	0.681365	AT2G44610.1	Ras-related small GTP-binding family protein
30214746	6	Pavir.Ia03490.1	0.4862	0.09303	-0.04	0.13303	1.09659	AT5G46570.1	BR-signaling kinase 2
30214749	2	Pavir.Ia01797.1	0.6573	0.1619	-0.04	0.2019	1.15021	AT3G60830.1	actin-related protein 7
30214755	15	Pavir.Ia04385.1	0.4784	-0.06468	-0.04	-0.02468	0.983039	AT3G04770.2	40s ribosomal protein SA B
30214763	3	Pavir.Ia01423.1	0.1986	0.1889	-0.04	0.2289	1.17194	AT4G34660.1	SH3 domain-containing protein
30214778	5	Pavir.Ia04971.1	0.819	-0.04137	-0.04	-0.00137	0.999051	AT2G45790.1	phosphomannomutase
30214823	3	Pavir.Ia04030.1	0.6354	-0.07553	-0.04	-0.03553	0.975673	AT1G27530.1
30214847	1	Pavir.Ia01290.1	0.399	-0.1658	-0.04	-0.1258	0.916496	AT1G47710.1	Serine protease inhibitor (SERPIN) family protein
30214850	9	Pavir.Ia04933.1	0.4896	0.1155	-0.04	0.1555	1.11381	AT3G51460.1	Phosphoinositide phosphatase family protein
30214861	1	Pavir.Ia04449.1	0.3957	0.3064	-0.04	0.3464	1.27138	AT1G20330.1	sterol methyltransferase 2
30214866	5	Pavir.Ia03431.1	0.1338	0.3033	-0.04	0.3433	1.26866	AT1G79620.1	Leucine-rich repeat protein kinase family protein
30214868	6	Pavir.Ia01612.1	0.1708	-0.2143	-0.04	-0.1743	0.886197	AT1G08130.1	DNA ligase 1
30214876	1	Pavir.Ia00744.1	0.7676	-0.214	-0.04	-0.174	0.886382	AT4G14960.2	Tubulin/FtsZ family protein
30214881	1	Pavir.Ia00972.1	0.5597	0.4333	-0.04	0.4733	1.38828	AT5G03470.1	Protein phosphatase 2A regulatory B subunit family protein
30214882	2	Pavir.Ia02934.1	0.5031	-0.2424	-0.04	-0.2024	0.869104	AT1G04110.1	Subtilase family protein
30214895	3	Pavir.Ia00327.1	0.5918	-0.0843	-0.04	-0.0443	0.96976	AT5G42650.1	allene oxide synthase
30214900	1	Pavir.Ia04813.1	0.8375	0.08487	-0.04	0.12487	1.09041	AT5G65780.1	branched-chain amino acid aminotransferase 5 / branched-chain amino acid transaminase 5 (BCAT5)
30214939	1	Pavir.Ia01731.1	0.8571	0.05479	-0.04	0.09479	1.06791	AT1G54450.1	Calcium-binding EF-hand family protein
30214975	10	Pavir.Ia01716.1	0.2123	-0.1852	-0.04	-0.1452	0.904254	AT1G17880.1	basic transcription factor 3
30214976	6	Pavir.Ia03902.1	0.9813	0.003385	-0.04	0.043385	1.03053	AT4G39080.1	vacuolar proton ATPase A3
30214977	2	Pavir.Ia00845.1	0.6581	0.06523	-0.04	0.10523	1.07567	AT1G70650.2	Ran BP2/NZF zinc finger-like superfamily protein
30214981	1	Pavir.Ia00391.1	0.9577	0.02582	-0.04	0.06582	1.04668	AT2G03430.1	Ankyrin repeat family protein
30214982	6	Pavir.Ia04693.1	0.9288	0.02108	-0.04	0.06108	1.04325	AT4G13780.1	methionine--tRNA ligase, putative / methionyl-tRNA synthetase, putative / MetRS, putative
30214985	2	Pavir.Ia03298.1	0.8117	-0.1278	-0.04	-0.0878	0.940957	AT3G54010.1	FKBP-type peptidyl-prolyl cis-trans isomerase family protein
30215008	3	Pavir.Ia00881.1	0.701	-0.1825	-0.04	-0.1425	0.905948	AT2G46520.1	cellular apoptosis susceptibility protein, putative / importin-alpha re-exporter, putative
30215012	1	Pavir.Ia00181.1	0.9215	0.03528	-0.04	0.07528	1.05357	AT5G05610.2	alfin-like 1
30215019	33	Pavir.Ia03597.1	<.0001	-0.37916	-0.04	-0.33916	0.790501	AT3G47340.1	glutamine-dependent asparagine synthase 1
30215024	1	Pavir.Ia03201.1	0.3811	0.708	-0.04	0.748	1.67946	AT1G17455.1	ELF4-like 4
30215029	5	Pavir.Ia01519.1	0.3816	-0.1308	-0.04	-0.0908	0.939002	AT4G36195.3	Serine carboxypeptidase S28 family protein
30215060	3	Pavir.Ia00807.1	0.4979	-0.1505	-0.04	-0.1105	0.926267	AT3G22400.1	PLAT/LH2 domain-containing lipoxygenase family protein
30215087	15	Pavir.Ia00247.1	0.061	-0.2531	-0.04	-0.2131	0.862682	AT1G01090.1	pyruvate dehydrogenase E1 alpha
30215133	3	Pavir.Ia02149.1	0.8357	0.06754	-0.04	0.10754	1.07739	AT1G10940.1	Protein kinase superfamily protein
30215141	14	Pavir.Ia01753.1	0.0016	-0.19335	-0.04	-0.15335	0.89916	AT1G57860.1	Translation protein SH3-like family protein
30215197	2	Pavir.Ia02682.1	0.6163	0.1349	-0.04	0.1749	1.12889	AT2G02040.1	peptide transporter 2
30215201	1	Pavir.Ia04668.1	0.5702	-0.4254	-0.04	-0.3854	0.765567	AT3G61690.1	nucleotidyltransferases
30215237	1	Pavir.Ia01507.1	0.4601	-0.2145	-0.04	-0.1745	0.886075	AT1G64940.1	cytochrome P450, family 87, subfamily A, polypeptide 6
30215238	2	Pavir.Ia04921.1	0.0707	0.449	-0.04	0.489	1.40347	AT1G09750.1	Eukaryotic aspartyl protease family protein
30215299	12	Pavir.Ia01092.1	0.1738	-0.1802	-0.04	-0.1402	0.907393	AT5G23860.1	tubulin beta 8
30215303	2	Pavir.Ia03716.1	0.2896	0.447	-0.04	0.487	1.40153	AT5G12290.1	dgd1 suppressor 1
30215316	1	Pavir.Ia03238.1	0.5111	-0.1701	-0.04	-0.1301	0.913768	AT2G26570.1	Plant protein of unknown function (DUF827)
30215317	4	Pavir.Ia00932.1	0.0204	-0.6948	-0.04	-0.6548	0.635164	AT1G55265.1	Protein of unknown function, DUF538
30215319	2	Pavir.Ia04055.1	0.5763	0.1259	-0.04	0.1659	1.12187	AT5G02270.1	non-intrinsic ABC protein 9
30215353	1	Pavir.Ia02315.1	0.6076	-0.3458	-0.04	-0.3058	0.808993	AT4G02340.1	alpha/beta-Hydrolases superfamily protein
30215426	1	Pavir.Ia02452.1	0.0232	-0.3841	-0.04	-0.3441	0.787799	AT1G78900.1	vacuolar ATP synthase subunit A
30215472	2	Pavir.Ia00113.1	0.4539	0.1879	-0.04	0.2279	1.17113	AT1G09760.1	U2 small nuclear ribonucleoprotein A
30215482	7	Pavir.Ia02234.1	0.5941	-0.06684	-0.04	-0.02684	0.981568	AT4G26000.1	RNA-binding KH domain-containing protein
30215510	1	Pavir.Ia02920.1	0.6385	-0.09822	-0.04	-0.05822	0.960448	AT2G36026.1	Ovate family protein
30215541	1	Pavir.Ia00901.1	0.4503	-0.2881	-0.04	-0.2481	0.842005	AT1G64790.1	ILITYHIA
30215579	2	Pavir.Ia01025.1	0.5937	-0.1063	-0.04	-0.0663	0.955084	AT5G03455.1	Rhodanese/Cell cycle control phosphatase superfamily protein
30215586	6	Pavir.Ia04631.1	0.5417	0.1538	-0.04	0.1938	1.14377	AT3G19650.1	cyclin-related
30215591	2	Pavir.Ia00295.1	0.0451	0.6658	-0.04	0.7058	1.63105	AT3G46060.2	RAB GTPase homolog 8A
30215593	4	Pavir.Ia03511.1	0.2755	0.2084	-0.04	0.2484	1.18789	AT4G17890.1	ARF-GAP domain 8
30215601	1	Pavir.Ia01859.1	0.7998	-0.05038	-0.04	-0.01038	0.992831	AT2G36950.1	Heavy metal transport/detoxification superfamily protein
30215613	2	Pavir.Ia00796.1	0.4974	-0.2919	-0.04	-0.2519	0.83979	AT2G02850.1	plantacyanin
30215618	4	Pavir.Ia01551.1	0.5855	-0.1258	-0.04	-0.0858	0.942262	AT4G00660.1	RNAhelicase-like 8
30215630	2	Pavir.Ia00956.1	0.1485	-0.3763	-0.04	-0.3363	0.79207	AT5G09570.1	Cox19-like CHCH family protein
30215648	3	Pavir.Ia03413.1	0.4633	0.1532	-0.04	0.1932	1.1433	AT3G11830.1	TCP-1/cpn60 chaperonin family protein
30215702	2	Pavir.Ia01681.1	0.3091	-0.1812	-0.04	-0.1412	0.906765	AT1G04430.1	S-adenosyl-L-methionine-dependent methyltransferases superfamily protein
30215710	1	Pavir.Ia02381.1	0.7076	-0.2598	-0.04	-0.2198	0.858684	AT4G12110.1	sterol-4alpha-methyl oxidase 1-1
30215712	1	Pavir.Ia04702.1	0.1214	-0.3195	-0.04	-0.2795	0.823877	AT1G68530.1	3-ketoacyl-CoA synthase 6
30215713	2	Pavir.Ia03248.1	0.8893	-0.04296	-0.04	-0.00296	0.99795	AT5G20870.1	O-Glycosyl hydrolases family 17 protein
30215723	1	Pavir.Ia01182.1	0.3418	-0.4488	-0.04	-0.4088	0.75325	AT5G04890.1	HSP20-like chaperones superfamily protein
30215730	5	Pavir.Ia00074.1	0.9709	0.004376	-0.04	0.044376	1.03124	AT4G00090.1	Transducin/WD40 repeat-like superfamily protein
30215744	1	Pavir.Ia01024.1	0.0552	-0.4701	-0.04	-0.4301	0.74221	AT4G19640.1	Ras-related small GTP-binding family protein
30215761	10	Pavir.Ia02350.1	0.7201	-0.06137	-0.04	-0.02137	0.985297	AT2G36850.1	glucan synthase-like 8
30215764	1	Pavir.Ia01679.1	0.8182	0.1475	-0.04	0.1875	1.13879	AT5G62600.1	ARM repeat superfamily protein
30215775	1	Pavir.Ia00259.1	0.2645	1.2377	-0.04	1.2777	2.42452	AT5G59010.1	Protein kinase protein with tetratricopeptide repeat domain
30215793	8	Pavir.Ia02784.1	0.1222	-0.2763	-0.04	-0.2363	0.84892	AT5G05340.1	Peroxidase superfamily protein
30215822	7	Pavir.Ia04389.1	0.2417	-0.10702	-0.04	-0.06702	0.954608	AT4G33250.1	eukaryotic translation initiation factor 3K
30215843	4	Pavir.Ia02079.1	0.9911	0.00217	-0.04	0.04217	1.02966	AT1G28590.1	GDSL-like Lipase/Acylhydrolase superfamily protein
30215848	3	Pavir.Ia03029.1	0.0305	0.5111	-0.04	0.5511	1.4652	AT3G50660.1	Cytochrome P450 superfamily protein
30215852	1	Pavir.Ia00065.1	0.8389	0.07394	-0.04	0.11394	1.08218	AT2G20410.1	RNA-binding ASCH domain protein
30215874	19	Pavir.Ia04446.1	0.0001	-0.35627	-0.04	-0.31627	0.803144	AT2G05710.1	aconitase 3
30215899	5	Pavir.Ia03753.1	0.2105	-0.2066	-0.04	-0.1666	0.89094	AT5G15810.1	N2,N2-dimethylguanosine tRNA methyltransferase
30215938	5	Pavir.Ia03139.1	0.0819	-0.4096	-0.04	-0.3696	0.773997	AT1G35780.1
30215939	1	Pavir.Ia02400.1	0.709	-0.07905	-0.04	-0.03905	0.973296	AT1G76630.2	Tetratricopeptide repeat (TPR)-like superfamily protein
30215945	1	Pavir.Ia00037.1	0.0407	-0.7391	-0.04	-0.6991	0.615956	AT5G43490.1
30215975	11	Pavir.Ia03723.1	<.0001	-0.56917	-0.04	-0.52917	0.692953	AT5G13690.1	alpha-N-acetylglucosaminidase family / NAGLU family
30216005	2	Pavir.Ia04250.1	0.6843	0.05741	-0.04	0.09741	1.06985	AT4G14110.1	COP9 signalosome, subunit CSN8
30216054	10	Pavir.J05546.1	0.2116	0.1745	-0.04	0.2145	1.1603	AT4G18800.1	RAB GTPase homolog A1D
30216066	4	Pavir.J15193.1	0.0639	-0.3248	-0.04	-0.2848	0.820855	AT3G01280.1	voltage dependent anion channel 1
30216067	1	Pavir.J15194.1	0.7408	-0.2734	-0.04	-0.2334	0.850628	AT5G20970.1	HSP20-like chaperones superfamily protein
30216069	1	Pavir.J07440.1	0.5847	0.507	-0.04	0.547	1.46104	AT1G23190.1	Phosphoglucomutase/phosphomannomutase family protein
30216071	1	Pavir.J20122.1	0.3861	0.288	-0.04	0.328	1.25527	AT3G25940.1	TFIIB zinc-binding protein
30216113	1	Pavir.J00676.1	0.1332	-0.682	-0.04	-0.642	0.640824	AT1G64890.1	Major facilitator superfamily protein
30216141	3	Pavir.J01600.1	0.323	-0.1475	-0.04	-0.1075	0.928195	AT2G47350.1	HIT zinc finger ;PAPA-1-like conserved region
30216148	3	Pavir.J25848.1	0.3338	0.1376	-0.04	0.1776	1.131	AT3G06350.1	dehydroquinate dehydratase, putative / shikimate dehydrogenase, putative
30216151	1	Pavir.J40164.1	0.8909	-0.09145	-0.04	-0.05145	0.964966	AT1G36180.1	acetyl-CoA carboxylase 2
30216162	1	Pavir.J08909.1	0.6159	0.1556	-0.04	0.1956	1.1452	AT5G55530.2	Calcium-dependent lipid-binding (CaLB domain) family protein
30216165	3	Pavir.J11096.1	0.8222	-0.06331	-0.04	-0.02331	0.983973	AT1G61870.1	pentatricopeptide repeat 336
30216189	3	Pavir.J06753.1	0.3075	0.1609	-0.04	0.2009	1.14942	AT4G02120.1	CTP synthase family protein
30216197	16	Pavir.J25865.1	0.1052	-0.2101	-0.04	-0.1701	0.888781	AT3G09630.1	Ribosomal protein L4/L1 family
30216201	1	Pavir.J01625.1	0.2241	1.2573	-0.04	1.2973	2.45768	AT5G06460.1	ubiquitin activating enzyme 2
30216203	1	Pavir.J01623.1	0.4259	-0.5685	-0.04	-0.5285	0.693275	AT5G05520.1	Outer membrane OMP85 family protein
30216220	2	Pavir.J25074.1	0.7171	0.08391	-0.04	0.12391	1.08968	AT1G73620.1	Pathogenesis-related thaumatin superfamily protein
30216223	7	Pavir.J27450.1	0.2756	0.1611	-0.04	0.2011	1.14957	AT5G53370.1	pectin methylesterase PCR fragment F
30216258	1	Pavir.J23401.1	0.3251	0.7021	-0.04	0.7421	1.67261	AT5G62440.1	Protein of unknown function (DUF3223)
30216281	2	Pavir.J14072.1	0.0197	-0.8726	-0.04	-0.8326	0.561516	AT1G52820.1	2-oxoglutarate (2OG) and Fe(II)-dependent oxygenase superfamily protein
30216307	1	Pavir.J01158.1	0.1077	-0.3478	-0.04	-0.3078	0.807873	AT1G28520.1	vascular plant one zinc finger protein
30216325	1	Pavir.J03974.1	0.8262	0.05396	-0.04	0.09396	1.0673	AT5G01390.1	DNAJ heat shock family protein
30216329	4	Pavir.J00886.1	0.9747	0.01158	-0.04	0.05158	1.0364	AT3G59920.1	RAB GDP dissociation inhibitor 2
30216335	2	Pavir.J24027.1	0.4653	0.2924	-0.04	0.3324	1.25911	AT3G02910.1	AIG2-like (avirulence induced gene) family protein
30216348	8	Pavir.J34008.1	0.0005	0.4155	-0.04	0.4555	1.37126	AT1G04980.1	PDI-like 2-2
30216359	5	Pavir.J19346.1	0.7331	-0.07498	-0.04	-0.03498	0.976045	AT5G10730.1	NAD(P)-binding Rossmann-fold superfamily protein
30216383	5	Pavir.J40345.1	0.2799	0.1809	-0.04	0.2209	1.16546	AT3G45010.1	serine carboxypeptidase-like 48
30216389	1	Pavir.J01298.1	0.3809	0.8968	-0.04	0.9368	1.91428	AT5G26680.2	5\'-3\' exonuclease family protein
30216393	2	Pavir.J01296.1	0.3656	0.2204	-0.04	0.2604	1.19781	AT5G04500.1	glycosyltransferase family protein 47
30216406	1	Pavir.J39089.1	0.104	0.6206	-0.04	0.6606	1.58074	AT1G06020.1	pfkB-like carbohydrate kinase family protein
30216445	1	Pavir.J02849.1	0.1425	-0.8157	-0.04	-0.7757	0.584105	AT5G49690.1	UDP-Glycosyltransferase superfamily protein
30216450	1	Pavir.J02499.1	0.5821	-0.4502	-0.04	-0.4102	0.752519	AT2G26040.1	PYR1-like 2
30216490	2	Pavir.J02111.1	0.2937	-0.1922	-0.04	-0.1522	0.899877	AT2G45600.1	alpha/beta-Hydrolases superfamily protein
[truncated: 5,415 more rows]

## Sheet: 400 uMRootTip2peptides
Total identified proteins in 400 µM 1-cm apical root-tip tissues (with 2 or more peptides)									Annotation (A. thaliana database)
[truncated: 4,131 more rows]

[truncated: 3 more sheets: elongation2peptides, 400 RT signi, 400 E signi]
