# Supplementary material for: Association of Proteomics Changes with Al-Sensitive Root Zones in Switchgrass
Source: Proteomes. 2018 Mar 22;6(2):15. doi: 10.3390/proteomes6020015 (PMC6027131; doi:10.3390/proteomes6020015)
Supplement: Supplementary file 1 [file proteomes-06-00015-s001.zip › Supplementary materials/supplementary materials Table S2.xlsx]

## Sheet: Root-tip raw data
Supplemental Table S2-2. The abundance value of peptides detected from the 400 µM Al treated 1-cm apical root tips in switchgrass
	Raw data								log2 transformation of raw data							Mean of control		log2 fold change
Protein Accession	pep_isunique	129c	128n	129n	128c	127n	130n	LOG2	129c	128n	129n	128c	127n	130n				129c	128n	129n	128c	127n	130n
30187571	1	836.834	1860.8	2004.59	2419.16	2214.54	2262.98		9.7088	10.8617	10.9691	11.2403	11.1128	11.144		10.5132		-0.804401	0.348508	0.455893	0.727095	0.599593	0.63081
30185070	1	4059.19	4152.46	4559.46	4322.37	5853.77	4610.34		11.987	12.0198	12.1546	12.0776	12.5151	12.1707		12.0538		-0.066816	-0.0340396	0.100856	0.0238155	0.461359	0.116866
30185070	1	5587.72	7621.53	8839.66	6615.77	5715.66	7512.06		12.448	12.8959	13.1098	12.6917	12.4807	12.875		12.8179		-0.369851	0.0779706	0.29188	-0.126202	-0.33719	0.0570987
30185070	1	5017.75	8411.29	8754.45	7838.48	8088.91	8995.78		12.2928	13.0381	13.0958	12.9364	12.9817	13.135		12.8089		-0.516088	0.229199	0.286889	0.127446	0.172817	0.32612
30185070	1	4469.44	8183.69	9217.65	5238.76	8103.91	9307.6		12.1259	12.9985	13.1702	12.355	12.9844	13.1842		12.7649		-0.638988	0.23367	0.405318	-0.409857	0.219536	0.419328
30185070	1	10258.4	12358.9	15793.7	11688.6	14240.2	14653.2		13.3245	13.5933	13.9471	13.5128	13.7977	13.8389		13.6216		-0.297095	-0.0283501	0.325445	-0.108802	0.176067	0.217311
30185070	1	10678.1	19294.5	17660.3	24479.6	28436.4	16608.9		13.3824	14.2359	14.1082	14.5793	14.7955	14.0197		13.9088		-0.526466	0.327071	0.199396	0.670463	0.886623	0.110837
30185070	1	16624.6	16756.7	18423.3	15947.3	22325.6	20299		14.021	14.0324	14.1692	13.961	14.4464	14.3091		14.0742		-0.053207	-0.0417959	0.0950029	-0.113219	0.372165	0.234879
30185070	1	16777.2	23599.5	18871.4	26544.5	32101.5	23040.3		14.0342	14.5265	14.2039	14.6961	14.9704	14.4919		14.2549		-0.220652	0.271603	-0.0509512	0.441259	0.715486	0.237004
30185070	1	14021.1	26757.1	34032.9	22248.4	31322	32775.3		13.7753	14.7076	15.0546	14.4414	14.9349	15.0003		14.5125		-0.737219	0.195105	0.542115	-0.0711175	0.422358	0.487791
30185070	1	25819.8	38718.5	46594.8	41382.1	46334.4	42932.4		14.6562	15.2407	15.5079	15.3367	15.4998	15.3898		15.1349		-0.478747	0.105801	0.372946	0.201785	0.364861	0.254843
30185080	1	2233.09	3951.45	5300.84	4156.74	3847.85	6317.75		11.1248	11.9482	12.372	12.0212	11.9098	12.6252		11.815		-0.690172	0.133165	0.557006	0.206236	0.0948361	0.810194
30185080	1	759.231	1797.26	4801.44	2993.61	3020.67	3690.83		9.5684	10.8116	12.2293	11.5477	11.5607	11.8497		10.8697		-1.30135	-0.0581586	1.35951	0.677927	0.69091	0.979987
30185080	1	3403.36	4176.75	9258.12	6722.16	6436.96	8059.73		11.7327	12.0282	13.1765	12.7147	12.6522	12.9765		12.3125		-0.579726	-0.284306	0.864033	0.402237	0.339692	0.664045
30185080	1	2986.35	4053.53	5849.67	5545.51	6209.05	3724.19		11.5442	11.985	12.5141	12.4371	12.6002	11.8627		12.0144		-0.470255	-0.0294614	0.499717	0.422681	0.585732	-0.151714
30185080	1	3301.18	5576.47	7173.33	6805.88	7116.32	9831.72		11.6888	12.4451	12.8084	12.7326	12.7969	13.2632		12.3141		-0.625343	0.131026	0.494318	0.418456	0.482806	0.949119
30185080	1	5239.43	8425.86	10778.9	9185.81	7015.88	10110.9		12.3552	13.0406	13.3959	13.1652	12.7764	13.3036		12.9306		-0.57538	0.110033	0.465346	0.234616	-0.154167	0.373052
30185080	1	4765.55	6717.85	9417.46	11313.2	9611.13	10990		12.2184	12.7138	13.2011	13.4657	13.2305	13.4239		12.7111		-0.492685	0.0026735	0.490012	0.754612	0.51938	0.71279
30185080	1	5956.69	11852.3	8873.48	7154.74	9992.31	12965		12.5403	13.5329	13.1153	12.8047	13.2866	13.6623		13.0628		-0.522526	0.470062	0.052464	-0.258136	0.223783	0.599517
30185080	1	11176.1	10565	13155.6	10549.1	11001.6	11437.1		13.4481	13.367	13.6834	13.3648	13.4254	13.4814		13.4995		-0.0513807	-0.132499	0.18388	-0.134672	-0.0740832	-0.0180768
30185080	1	10484.3	12282	15448.9	17069.4	14621.7	18275.5		13.3559	13.5843	13.9152	14.0591	13.8358	14.1576		13.6185		-0.262528	-0.0342153	0.296743	0.440647	0.21735	0.53915
30185080	1	10267.2	14764.3	14338	13232.1	15632.7	14477.7		13.3257	13.8498	13.8076	13.6918	13.9323	13.8215		13.661		-0.335292	0.188781	0.146511	0.0307187	0.271242	0.160503
30185080	1	11110.4	15082.5	17364.2	20696.3	20501.6	22463.6		13.4396	13.8806	14.0838	14.3371	14.3234	14.4553		13.8013		-0.361724	0.0792436	0.28248	0.53574	0.522103	0.653953
30185080	1	10558.6	16437.9	16822.7	17981.5	16880.7	23180.5		13.3661	14.0047	14.0381	14.1342	14.0431	14.5006		13.803		-0.436861	0.201738	0.235123	0.331229	0.240094	0.697626
30185080	1	16480.2	41021.5	41901.1	50775.4	53661.5	25561.6		14.0085	15.3241	15.3547	15.6318	15.7116	14.6417		14.8957		-0.887297	0.428344	0.458952	0.736095	0.815853	-0.254056
30185080	1	11478.6	14116.1	21246.5	14848.6	20381.9	18361.2		13.4867	13.7851	14.3749	13.858	14.315	14.1644		13.8822		-0.395557	-0.0971613	0.492718	-0.0241802	0.432782	0.282154
30185080	1	11697.1	12257	17815.3	17076.1	20128	22761.8		13.5139	13.5813	14.1208	14.0597	14.2969	14.4743		13.7387		-0.224806	-0.157353	0.382159	0.321019	0.558242	0.735657
30185080	1	17801.9	29708	33862.6	28884.3	24236.8	36509.3		14.1197	14.8586	15.0474	14.818	14.5649	15.156		14.6752		-0.555491	0.183326	0.372165	0.14276	-0.110329	0.480737
30185080	1	17344.8	23661.3	30024.2	32577	24805	33807.3		14.0822	14.5302	14.8738	14.9916	14.5983	15.045		14.4954		-0.413214	0.0348083	0.378406	0.496134	0.102908	0.549615
30185080	1	17237.6	27005.6	36120.9	29983.3	28078.5	35750.1		14.0733	14.721	15.1405	14.8719	14.7772	15.1257		14.6449		-0.57166	0.0760437	0.495616	0.226942	0.132247	0.48073
30185080	1	19489.4	23483.7	36009.5	28581.1	27521.6	36052.2		14.2504	14.5194	15.1361	14.8028	14.7483	15.1378		14.6353		-0.384884	-0.115917	0.500802	0.167484	0.112991	0.502511
30185080	1	19289.1	27844.9	36890.9	35660.1	41856	38522		14.2355	14.7651	15.171	15.122	15.3531	15.2334		14.7239		-0.488369	0.0412591	0.44711	0.398154	0.62928	0.509526
30185080	1	11217.3	30925.4	45078.2	40550.5	32638.1	50482.9		13.4534	14.9165	15.4601	15.3074	14.9943	15.6235		14.61		-1.15659	0.306479	0.850113	0.697405	0.38424	1.01348
30185080	1	25054.6	29815.5	39012.1	40272.1	28812.2	43495.7		14.6128	14.8638	15.2516	15.2975	14.8144	15.4086		14.9094		-0.296612	-0.0456235	0.342236	0.388097	-0.0950064	0.499189
30185080	1	24424.8	27684	43865.8	41158.5	36904.7	42970.1		14.5761	14.7568	15.4208	15.3289	15.1715	15.391		14.9179		-0.341817	-0.161114	0.502931	0.411027	0.25364	0.473167
30185080	1	23828.3	55547.9	71461.6	77210.9	63045.4	81640.2		14.5404	15.7614	16.1249	16.2365	15.9441	16.317		15.4756		-0.935183	0.285874	0.649309	0.760947	0.468533	0.84142
30185080	1	107300	185005	193925	186141	182481	220174		16.7113	17.4972	17.5651	17.506	17.4774	17.7483		17.2579		-0.546593	0.239329	0.307264	0.248156	0.21951	0.49041
30185128	1	42668.2	45762	47664.8	53365.3	51557.4	63992.1		15.3809	15.4819	15.5406	15.7036	15.6539	15.9656		15.4678		-0.0869171	0.0140726	0.0728444	0.235823	0.186101	0.497815
30185142	1	6367.31	6101.52	6675.38	6469.23	6783.9	6443.91		12.6365	12.575	12.7046	12.6594	12.7279	12.6537		12.6387		-0.0022167	-0.0637326	0.0659493	0.0206932	0.0892134	0.0150358
30185142	1	5882.14	7965.45	12368.9	10473.6	12037.8	7822.17		12.5221	12.9595	13.5944	13.3545	13.5553	12.9334		13.0254		-0.503239	-0.065825	0.569064	0.329111	0.529922	-0.0920107
30185142	1	9249.4	11090.9	13802.2	12220.8	13799.5	13456.1		13.1751	13.4371	13.7526	13.577	13.7523	13.716		13.4549		-0.279803	-0.0178585	0.297661	0.1221	0.297379	0.261023
30185142	1	5492.42	8639.43	10171.9	8015.5	9637.84	9942.22		12.4232	13.0767	13.3123	12.9686	13.2345	13.2794		12.9374		-0.514191	0.139304	0.374887	0.0311605	0.297078	0.341937
30185142	1	15239.7	16824.5	16915	19629.9	25633.4	18785.7		13.8955	14.0383	14.046	14.2608	14.6457	14.1973		13.9933		-0.097735	0.0449968	0.0527383	0.267482	0.652457	0.204066
30244820	1	11298.6	12425.1	15111.2	14740.5	13522.7	15846.1		13.4639	13.601	13.8833	13.8475	13.7231	13.9518		13.6494		-0.185528	-0.0484134	0.233941	0.198112	0.0737106	0.302452
30244820	1	13961.7	20275.3	22526.3	24393.1	21778.8	21899.7		13.7692	14.3074	14.4593	14.5742	14.4106	14.4186		14.1786		-0.409462	0.128786	0.280676	0.395535	0.231989	0.239973
30244820	1	15950.1	22192.6	27253	21563.3	22018.8	23498.5		13.9613	14.4378	14.7341	14.3963	14.4264	14.5203		14.3777		-0.416452	0.0600597	0.356392	0.0185602	0.048716	0.142545
30244820	1	20594.4	35653.3	35384.9	32285.4	28438.9	34112.2		14.33	15.1217	15.1108	14.9786	14.7956	15.058		14.8542		-0.524224	0.267564	0.256661	0.124409	-0.0586089	0.203813
30244820	1	38285.2	73838.8	61497.2	70741.3	66491.7	39143.7		15.2245	16.1721	15.9082	16.1103	16.0209	15.2565		15.7683		-0.543775	0.403816	0.139959	0.34199	0.252613	-0.511781
30244820	1	36681.5	69898.1	69683.1	65995.2	57883.1	62105.7		15.1628	16.093	16.0885	16.0101	15.8209	15.9224		15.7814		-0.618651	0.311547	0.307104	0.228655	0.0394365	0.141022
30244820	1	48693.1	91556	86642.3	86752.2	78941.1	77659.2		15.5714	16.4824	16.4028	16.4046	16.2685	16.2449		16.1522		-0.580763	0.330173	0.25059	0.252419	0.116295	0.0926758
30244820	1	209609	335539	394671	318289	286153	288639		17.6773	18.3561	18.5903	18.28	18.1264	18.1389		18.2079		-0.530578	0.148204	0.382374	0.0720619	-0.0814887	-0.0690068
30185142	1	17945.2	17471	20627.8	19387	23216.3	21411.1		14.1313	14.0927	14.3323	14.2428	14.5029	14.3861		14.1854		-0.0541159	-0.0927581	0.146874	0.057372	0.317423	0.20064
30185142	1	14788.4	17411.2	20099.8	20733.9	26759.5	23850		13.8522	14.0877	14.2949	14.3397	14.7078	14.5417		14.0783		-0.22609	0.00946183	0.216628	0.261438	0.629498	0.463435
30185142	1	16697.3	22167.4	20188.1	21004.9	25765.6	22893.2		14.0273	14.4362	14.3012	14.3584	14.6532	14.4826		14.2549		-0.227573	0.181254	0.0463187	0.103536	0.398259	0.227733
30185142	1	15393.8	15881.4	20634.4	18293.9	21358.1	16221.4		13.9101	13.9551	14.3328	14.1591	14.3825	13.9856		14.066		-0.155898	-0.110908	0.266806	0.0931171	0.31654	-0.0803516
30185142	1	24651.4	31696.7	33203.2	35391	39339.8	36831.1		14.5894	14.952	15.019	15.1111	15.2637	15.1686		14.8535		-0.264106	0.0985584	0.165548	0.257609	0.410216	0.31515
30185142	1	29234.4	41065.9	39879.8	41651.8	54786.4	30522.7		14.8354	15.3257	15.2834	15.3461	15.7415	14.8976		15.1481		-0.312753	0.177518	0.135235	0.197957	0.593397	-0.25054
30185142	1	26920.7	42170.2	39033.9	42457.5	51277	35588.1		14.7164	15.3639	15.2524	15.3737	15.646	15.1191		15.1109		-0.394506	0.253	0.141506	0.262798	0.53509	0.00817425
30185142	1	32255	44397.4	44488.6	52115.5	61657.8	45695.9		14.9772	15.4382	15.4411	15.6694	15.912	15.4798		15.2855		-0.308288	0.152663	0.155624	0.383901	0.626471	0.194254
30185142	1	48735	95309.6	78501.9	118612	142861	46776.7		15.5727	16.5403	16.2604	16.8559	17.1243	15.5135		16.1245		-0.551811	0.415852	0.135959	0.73141	0.99977	-0.610979
30185142	1	47421.2	70533.7	50465.9	49643.3	69685.7	57138.4		15.5332	16.106	15.623	15.5993	16.0886	15.8022		15.7541		-0.220853	0.351928	-0.131075	-0.154786	0.334478	0.0480757
30185142	1	65480.2	80558.3	73740.7	93708.7	105058	91774.8		15.9988	16.2977	16.1702	16.5159	16.6808	16.4858		16.1556		-0.156793	0.142182	0.0146102	0.360331	0.525268	0.330247
30185142	1	58291.1	77562.9	87204.1	97209	113589	99722		15.831	16.2431	16.4121	16.5688	16.7935	16.6056		16.1621		-0.33107	0.0810199	0.25005	0.406744	0.631402	0.443565
30185142	1	184716	240395	271297	264237	333567	225291		17.4949	17.875	18.0495	18.0115	18.3476	17.7814		17.8065		-0.311555	0.0685454	0.24301	0.204969	0.541111	-0.0250706
30185142	1	251446	365757	490861	439522	503626	430944		17.9399	18.4805	18.905	18.7456	18.942	18.7171		18.4418		-0.501903	0.0387366	0.463166	0.303787	0.500205	0.275351
30185151	1	3765.2	6660.78	6318.37	8099.96	6940.82	8938.54		11.8785	12.7015	12.6253	12.9837	12.7609	13.1258		12.4018		-0.523263	0.2997	0.223562	0.581923	0.359115	0.724047
30185151	1	5893.48	7399.64	7215.29	10585.8	11081.2	10283.2		12.5249	12.8532	12.8168	13.3698	13.4358	13.328		12.7317		-0.206757	0.121578	0.0851795	0.638178	0.704169	0.596338
30185151	1	8566.19	10090.4	9331.73	8779.98	9030.1	9475.38		13.0644	13.3007	13.1879	13.1	13.1405	13.21		13.1844		-0.119917	0.116343	0.00357425	-0.084353	-0.0438294	0.0256126
30185151	1	9772.46	13951.6	14589.3	14213.4	14463.1	17389.4		13.2545	13.7681	13.8326	13.795	13.8201	14.0859		13.6184		-0.36392	0.14972	0.214199	0.176541	0.201661	0.467498
30185151	1	22663.4	28755.6	38785	39532.6	32160.7	51696.6		14.4681	14.8116	15.2432	15.2708	14.973	15.6578		14.8409		-0.37287	-0.0293915	0.402262	0.429807	0.132063	0.816835
30185151	1	28591.1	45093	38657.5	44640.8	50005.4	34265.9		14.8033	15.4606	15.2385	15.4461	15.6098	15.0645		15.1675		-0.364171	0.293163	0.0710088	0.278622	0.442343	-0.102966
30185151	1	40522	50275.8	56645.9	68711.2	60200.9	63125.6		15.3064	15.6176	15.7897	16.0683	15.8775	15.9459		15.5712		-0.264807	0.0463491	0.218458	0.497032	0.306271	0.37471
30185155	1	4021.4	3612.49	6168.08	5153.55	5199.48	7248.78		11.9735	11.8188	12.5906	12.3314	12.3442	12.8235		12.1276		-0.154141	-0.308843	0.462984	0.203729	0.216529	0.695901
30185155	1	6801.82	4024.59	4861.38	6389.43	6558.13	8820.03		12.7317	11.9746	12.2471	12.6415	12.6791	13.1066		12.3178		0.413879	-0.343202	-0.0706773	0.323644	0.361243	0.788741
30185155	1	8443.12	9845.65	12810.8	11688.5	10397.3	13435.4		13.0436	13.2653	13.6451	13.5128	13.3439	13.7138		13.318		-0.274408	-0.0526976	0.327106	0.194836	0.0259476	0.395786
30185155	1	13438.1	15964.1	17821.5	16554.4	15624.2	19054.9		13.714	13.9625	14.1213	14.0149	13.9315	14.2179		13.9326		-0.218595	0.0299064	0.188688	0.0822876	-0.00114858	0.285233
30185155	1	30830	38154.9	53659.8	54086	54635.7	60239.5		14.912	15.2196	15.7116	15.723	15.7376	15.8784		15.2811		-0.369012	-0.0614815	0.430493	0.441906	0.456496	0.597361
30185168	1	2150.04	3657.64	4643.94	2637.29	4811.96	3669.95		11.0701	11.8367	12.1811	11.3648	12.2324	11.8415		11.696		-0.625843	0.140703	0.485141	-0.331151	0.536417	0.145552
30185168	1	10356.6	13844.7	16386	17517	17919.3	18335		13.3383	13.757	14.0002	14.0965	14.1292	14.1623		13.6985		-0.360227	0.0585495	0.301677	0.39797	0.430734	0.463819
30185168	1	41370	47562.5	52447.8	54298.2	49554.2	61408.8		15.3363	15.5375	15.6786	15.7286	15.5967	15.9062		15.5175		-0.181181	0.0200618	0.161119	0.211141	0.0792426	0.388682
30185168	1	49770.5	51389.7	79937.5	80838	82137	79089		15.603	15.6492	16.2866	16.3027	16.3257	16.2712		15.8463		-0.243257	-0.197068	0.440326	0.456486	0.479485	0.424929
30185168	1	88490.1	144154	148752	199375	178231	195494		16.4332	17.1373	17.1826	17.6051	17.4434	17.5768		16.9177		-0.48445	0.219576	0.264874	0.687449	0.525714	0.659084
30185183	1	50562.9	78566	117952	111953	139813	104824		15.6258	16.2616	16.8478	16.7725	17.0931	16.6776		16.2451		-0.619293	0.0165322	0.602761	0.52745	0.848058	0.432527
30185249	1	19217.4	25402.8	49246	38962.1	33189.3	40104.7		14.2301	14.6327	15.5877	15.2498	15.0184	15.2915		14.8168		-0.586725	-0.184147	0.770871	0.432937	0.201584	0.474638
30185282	1	5595.78	4889.3	7356.68	7893.57	5131.07	9871.53		12.4501	12.2554	12.8448	12.9465	12.325	13.2691		12.5168		-0.0666686	-0.261378	0.328047	0.429671	-0.191749	0.752266
30185282	1	9799.71	11666	17335.8	13536.9	12068.3	14160.1		13.2585	13.51	14.0815	13.7246	13.5589	13.7895		13.6167		-0.358145	-0.106652	0.464797	0.107947	-0.0577324	0.172879
30185282	1	26269.1	35662.3	33025.8	41889.4	47791.9	23923.3		14.6811	15.1221	15.0113	15.3543	15.5445	14.5461		14.9382		-0.257086	0.183947	0.0731397	0.41613	0.606313	-0.39204
30185282	1	26100.4	28555.4	32475.7	30087.4	25889.9	37242.9		14.6718	14.8015	14.9871	14.8769	14.6601	15.1847		14.8201		-0.148326	-0.0186364	0.166962	0.0567586	-0.160011	0.364568
30185282	1	27739.9	25697.1	33011.3	28321	27346.2	39195.1		14.7597	14.6493	15.0107	14.7896	14.7391	15.2584		14.8066		-0.0468807	-0.157238	0.204118	-0.016968	-0.0675016	0.451831
30185318	1	2610.51	7762.17	4075.03	5448.59	9975.6	7138.36		11.3501	12.9222	11.9926	12.4117	13.2842	12.8014		12.0883		-0.738202	0.833925	-0.0957232	0.323347	1.19587	0.713057
30185318	1	6360.98	6759.81	11611.4	8478.19	8645.06	10861		12.635	12.7228	13.5032	13.0495	13.0777	13.4069		12.9537		-0.31865	-0.230916	0.549566	0.0958571	0.123978	0.453185
30185318	1	14718.9	15114.5	19113.3	19737.2	23930.1	22533.1		13.8454	13.8836	14.2223	14.2686	14.5465	14.4598		13.9838		-0.13839	-0.100127	0.238518	0.284852	0.562764	0.475983
30185318	1	13614.8	19949.5	17360.9	19288	19955.6	23521.4		13.7329	14.2841	14.0836	14.2354	14.2845	14.5217		14.0335		-0.300613	0.250561	0.0500519	0.201914	0.251003	0.488185
30185318	1	19112	18223.1	25864.9	15423.6	23549.7	24182.3		14.2222	14.1535	14.6587	13.9128	14.5234	14.5617		14.3448		-0.1226	-0.191311	0.313912	-0.431946	0.178625	0.216868
30185405	1	4857.32	4233.26	6203.56	7019.08	10033.2	5642.08		12.2459	12.0476	12.5989	12.7771	13.2925	12.462		12.2975		-0.0515141	-0.249906	0.30142	0.479607	0.995034	0.164551
30185405	1	14371.3	17721.4	21346.3	20652.6	20104.4	22930.1		13.8109	14.1132	14.3817	14.334	14.2952	14.485		14.1019		-0.29103	0.0112683	0.279762	0.232101	0.193289	0.383018
30185405	1	17296.3	16432	19601.3	16376.5	16794.6	20347.5		14.0782	14.0042	14.2587	13.9993	14.0357	14.3126		14.1137		-0.0355088	-0.109467	0.144976	-0.114353	-0.0779767	0.198877
30185460	1	2995.94	1516.15	2573.2	824.938	4021.2	2154.56		11.5488	10.5662	11.3293	9.68814	11.9734	11.0732		11.1481		0.400682	-0.581917	0.181236	-1.45997	0.825298	-0.0749317
30185460	1	12321.4	7784.2	14335.9	6047.59	13947.3	10123.6		13.5889	12.9263	13.8073	12.5621	13.7677	13.3054		13.4408		0.148024	-0.514517	0.366493	-0.878706	0.326853	-0.13541
30185460	1	20884.9	9942.78	17486.5	12468.9	21620.1	8785.36		14.3502	13.2794	14.094	13.606	14.4001	13.1009		13.9079		0.442321	-0.628419	0.186099	-0.301808	0.492235	-0.806967
30185460	1	22958.3	7654.14	18385.8	7291.55	17987.4	10046.5		14.4867	12.902	14.1663	12.832	14.1347	13.2944		13.8517		0.635042	-0.949661	0.314618	-1.01968	0.283013	-0.557273
30185460	1	26234.8	11944.8	24358.9	10780.1	28361.1	14974.9		14.6792	13.5441	14.5722	13.3961	14.7916	13.8703		14.2652		0.414044	-0.721056	0.307012	-0.869069	0.526475	-0.394897
30185460	1	30801.6	13164	28852.7	13450.2	33992.5	15239.3		14.9107	13.6843	14.8164	13.7153	15.0529	13.8955		14.4705		0.440237	-0.786172	0.345935	-0.75514	0.582447	-0.574973
30185460	1	261366	89167.8	219620	101644	280788	97502.4		17.9957	16.4442	17.7447	16.6332	18.0991	16.5731		17.3949		0.600847	-0.950631	0.349784	-0.761703	0.704256	-0.821717
30185460	1	377053	139376	303527	132717	415508	123862		18.5244	17.0886	18.2115	17.018	18.6645	16.9184		17.9415		0.582912	-0.852879	0.269967	-0.923502	0.72302	-1.02313
30185460	1	1.65594e+06	479564	1.02226e+06	617854	1.537e+06	536954		20.6592	18.8714	19.9633	19.2369	20.5517	19.0344		19.8313		0.827913	-0.959943	0.13203	-0.594401	0.720381	-0.796869
30185542	1	3146.44	4480.01	4528.66	7435.58	5741.03	7044.82		11.6195	12.1293	12.1449	12.8602	12.4871	12.7823		11.9646		-0.345049	0.164733	0.180316	0.895675	0.522539	0.817794
30185542	1	31598.5	47183.6	33326.6	56090.5	72318.4	28071.3		14.9476	15.526	15.0244	15.7755	16.1421	14.7768		15.166		-0.218417	0.360014	-0.141597	0.609484	0.97609	-0.389175
30185542	1	63835.2	83146.7	82275.6	102974	114312	92673.6		15.9621	16.3434	16.3282	16.6519	16.8026	16.4999		16.2112		-0.249141	0.132167	0.116974	0.440721	0.591418	0.288667
30185591	1	3013.78	3206.74	4535.82	5522.16	3525.54	6120.55		11.5574	11.6469	12.1471	12.431	11.7836	12.5794		11.7838		-0.22644	-0.136907	0.363348	0.647217	-0.000172205	0.795648
30185591	1	21264.3	26629.4	26879.6	29038.4	26211.1	28756.5		14.3761	14.7007	14.7142	14.8257	14.6779	14.8116		14.597		-0.220886	0.103698	0.117188	0.228641	0.0808573	0.214569
30185592	1	9014.76	8575.58	8985.9	6479.82	16988	6754.44		13.1381	13.066	13.1334	12.6617	14.0522	12.7216		13.1125		0.0255607	-0.046495	0.0209343	-0.450775	0.939715	-0.390893
30185592	1	25828.1	22651.6	21911.5	12815.6	37152.5	15463.9		14.6567	14.4673	14.4194	13.6456	15.1812	13.9166		14.5145		0.142195	-0.0471359	-0.0950592	-0.868845	0.666711	-0.597846
30185598	1	4365.9	8247.74	9025.26	9519.84	9709.3	10327		12.0921	13.0098	13.1398	13.2167	13.2452	13.3341		12.7472		-0.655137	0.262583	0.392554	0.469522	0.497952	0.586939
30185603	1	15754.7	12823.5	17173.5	15526.5	17607.4	18756.6		13.9435	13.6465	14.0679	13.9224	14.1039	14.1951		13.886		0.057531	-0.239464	0.181933	0.0364786	0.217931	0.309144
30185603	1	15574.3	28768.1	27322.3	28404.4	25686.3	37212.9		13.9269	14.8122	14.7378	14.7938	14.6487	15.1835		14.4923		-0.565403	0.319896	0.245507	0.301544	0.156426	0.691231
30185603	1	54066.2	46648.2	64165.6	67895.4	67275.4	70765.8		15.7224	15.5095	15.9695	16.051	16.0378	16.1108		15.7338		-0.0113899	-0.224294	0.235684	0.317198	0.303964	0.376936
30185605	1	7979.02	7170.07	12639.2	7810.3	8467.03	12524.2		12.962	12.8078	13.6256	12.9312	13.0476	13.6124		13.1318		-0.169797	-0.324022	0.493819	-0.200632	-0.084154	0.48064
30185607	1	16709.4	20235	23120.2	26196.8	18595.7	23130.6		14.0284	14.3046	14.4969	14.6771	14.1827	14.4975		14.2766		-0.248231	0.0279647	0.220266	0.400499	-0.0939204	0.220911
30185615	1	2671.36	5382.16	6939.86	7467.92	5343.83	6519.7		11.3834	12.394	12.7607	12.8665	12.3837	12.6706		12.1793		-0.795981	0.21463	0.581351	0.687151	0.204318	0.49125
30185650	1	14988.7	12871.4	16458.3	14039.7	17943.3	16644.6		13.8716	13.6519	14.0065	13.7772	14.1312	14.0228		13.8433		0.0282554	-0.191452	0.163197	-0.0661115	0.28783	0.179432
30185674	1	13957.4	13389.8	21226.6	10981	23967.1	13914.3		13.7687	13.7088	14.3736	13.4227	14.5488	13.7643		13.9504		-0.181652	-0.241545	0.423197	-0.527675	0.598377	-0.186116
30185752	1	2484.55	7343.09	6254.88	7481.77	7672.8	9634.52		11.2788	12.8422	12.6108	12.8692	12.9055	13.234		12.2439		-0.965133	0.598269	0.366864	0.625262	0.661635	0.990095
30185752	1	4461.88	14773.7	11009	12527.4	13798.9	14540.5		12.1234	13.8507	13.4264	13.6128	13.7523	13.8278		13.1335		-1.01009	0.717218	0.292872	0.479273	0.618739	0.694263
30185752	1	4273.34	19067.7	14120.5	17107.8	15814.1	16500.5		12.0611	14.2188	13.7855	14.0624	13.9489	14.0102		13.3552		-1.29402	0.863676	0.43034	0.707199	0.593764	0.655062
30185752	1	8785.33	14624.8	15996.8	15884.5	19561.6	18495.5		13.1009	13.8361	13.9655	13.9553	14.2557	14.1749		13.6342		-0.533288	0.201963	0.331326	0.321168	0.621571	0.540714
30185752	1	11799.7	21233.6	25652.1	26021.5	25225.1	29653.7		13.5265	14.3741	14.6468	14.6674	14.6226	14.8559		14.1824		-0.655978	0.191625	0.464353	0.484984	0.440137	0.67349
30185752	1	9469.97	26375.2	30330.7	36830.8	31197	35840.8		13.2091	14.6869	14.8885	15.1686	14.9291	15.1293		14.2615		-1.05237	0.425382	0.626983	0.907114	0.667609	0.867804
30185752	1	10049.2	20402	22185.9	25139.4	24040.2	25089.4		13.2948	14.3164	14.4374	14.6177	14.5532	14.6148		14.0162		-0.721394	0.300232	0.421161	0.601468	0.536971	0.598599
30185752	1	8032.52	39384.4	39372	49932.8	36166	48238.6		12.9716	15.2653	15.2649	15.6077	15.1423	15.5579		14.5006		-1.52898	0.764718	0.764264	1.10708	0.641727	1.05728
30185814	1	8489.28	12663.6	11840.6	11175.3	11395.6	11255.5		13.0514	13.6284	13.5315	13.448	13.4762	13.4583		13.4038		-0.352334	0.224645	0.12769	0.0442711	0.0724253	0.0545803
30185814	1	13262	13316.7	15161.5	15299.5	17779.7	18728.4		13.695	13.7009	13.8881	13.9012	14.1179	14.1929		13.7614		-0.0663545	-0.0604137	0.126768	0.139833	0.356586	0.43158
30185814	1	13493.3	23303.4	21606	21533.3	20948.4	34093.8		13.72	14.5082	14.3991	14.3943	14.3546	15.0572		14.2091		-0.48916	0.299134	0.190026	0.185169	0.145436	0.848105
30185834	1	22861.9	23626.9	30905.9	28608.4	29985.7	32494.2		14.4807	14.5281	14.9156	14.8042	14.872	14.9879		14.6415		-0.160807	-0.113322	0.274128	0.162687	0.230523	0.346428
30185835	1	19208.6	21050.7	19916.1	29536.2	25223.2	28677		14.2295	14.3616	14.2816	14.8502	14.6225	14.8076		14.2909		-0.0614317	0.0706799	-0.00924824	0.5593	0.331568	0.516709
30185835	1	20244	26804.3	24398.4	30153.1	27727.1	33185.3		14.3052	14.7102	14.5745	14.88	14.759	15.0183		14.53		-0.224753	0.180216	0.0445376	0.350061	0.22905	0.488299
30185835	1	26319.5	41610.2	39830.7	44685.3	39064.7	50471.3		14.6838	15.3446	15.2816	15.4475	15.2536	15.6232		15.1034		-0.419518	0.241286	0.178232	0.344151	0.150214	0.519813
30185835	1	26882.3	45138.7	44279.9	44921.5	44774.3	53405.8		14.7144	15.4621	15.4344	15.4551	15.4504	15.7047		15.2036		-0.489234	0.258474	0.23076	0.251515	0.246781	0.501104
30185835	1	33399.8	41193.2	36814.9	62633.3	52604.3	62347.6		15.0276	15.3301	15.168	15.9346	15.6829	15.928		15.1752		-0.147672	0.154895	-0.00722309	0.759416	0.507669	0.752822
30185835	1	48618.5	63362.8	59291.5	72851.4	69640.5	76152.3		15.5692	15.9513	15.8555	16.1527	16.0876	16.2166		15.792		-0.222817	0.159314	0.0635039	0.360633	0.295604	0.424564
30185943	1	2524.9	2665.55	4128.8	4020.55	2017.04	2027.83		11.302	11.3802	12.0115	11.9732	10.978	10.9857		11.5646		-0.262568	-0.184359	0.446927	0.4086	-0.586556	-0.578859
30185943	1	23261.5	19386.8	21265.1	26566.4	38074.4	32812.3		14.5057	14.2428	14.3762	14.6973	15.2165	15.0019		14.3749		0.130776	-0.132095	0.00131925	0.322434	0.84165	0.627066
30185943	1	127532	136574	144320	185006	200876	242113		16.9605	17.0593	17.1389	17.4972	17.6159	17.8853		17.0529		-0.0924111	0.00641053	0.0860006	0.4443	0.563034	0.832411
30185990	1	1962.25	1629.55	2076.82	2074.82	2063.52	1976.39		10.9383	10.6703	11.0202	11.0188	11.0109	10.9487		10.8762		0.0620567	-0.20598	0.143923	0.142535	0.134655	0.0724154
30185990	1	1654.12	2604.41	2917.36	2541.98	2217.48	2795.96		10.6918	11.3467	11.5104	11.3117	11.1147	11.4491		11.183		-0.491166	0.16373	0.327436	0.128726	-0.0683067	0.266117
30185990	1	9534.88	16671.1	20749.8	15583.7	8581.03	20676.1		13.219	14.0251	14.3408	13.9277	13.0669	14.3357		13.8616		-0.642622	0.163437	0.479185	0.0661275	-0.794686	0.474058
30185990	1	23840.5	37487.9	36686.8	34073.6	27285.9	34310.7		14.5411	15.1941	15.163	15.0564	14.7359	15.0664		14.9661		-0.424952	0.228057	0.196895	0.090286	-0.230211	0.10029
30185990	1	32434.3	54599	59678.3	45591.9	46310.7	52787.4		14.9852	15.7366	15.8649	15.4765	15.4991	15.6879		15.5289		-0.543681	0.207674	0.336007	-0.0524214	-0.0298532	0.158993
30185990	1	50378	84670.9	80166.5	64044.1	61144.4	85430.9		15.6205	16.3696	16.2907	15.9668	15.8999	16.3825		16.0936		-0.473093	0.275979	0.197113	-0.126822	-0.193666	0.288872
30185990	1	153037	269100	337875	235541	166189	284400		17.2235	18.0378	18.3661	17.8456	17.3425	18.1176		17.8758		-0.652288	0.161971	0.490317	-0.0301918	-0.533344	0.241751
30186007	1	898.451	2364.71	2639.87	1937.5	2960.81	2830.6		9.8113	11.2074	11.3663	10.92	11.5318	11.4669		10.795		-0.983701	0.412448	0.571253	0.124985	0.736779	0.671897
30186007	1	1187.95	1894.79	1828.44	2573.95	3624.89	4892.98		10.2143	10.8878	10.8364	11.3298	11.8237	12.2565		10.6462		-0.431898	0.241663	0.190235	0.683609	1.17756	1.61034
30186007	1	2897.37	3008.97	2775.67	2743.6	2603.45	3325.75		11.5005	11.5551	11.4386	11.4219	11.3462	11.6995		11.4981		0.00246205	0.0569854	-0.0594474	-0.0762155	-0.15186	0.201396
30186007	1	2938.22	2771.42	2185.14	4771.36	3714.17	3911.35		11.5207	11.4364	11.0935	12.2202	11.8588	11.9335		11.3502		0.17051	0.0861946	-0.256704	0.869969	0.508607	0.583234
30186007	1	3857.89	5694.28	3876.13	3336.33	4961.82	5733.53		11.9136	12.4753	11.9204	11.704	12.2767	12.4852		12.1031		-0.189502	0.372199	-0.182697	-0.39905	0.173557	0.382111
30186007	1	4447.45	3430.64	5014.98	5340.96	4960.78	4685.16		12.1188	11.7443	12.292	12.3829	12.2764	12.1939		12.0517		0.0670787	-0.307422	0.240343	0.331198	0.224666	0.142197
30186007	1	3717.38	3385.57	4143.55	4287.99	4369.27	4849.61		11.8601	11.7252	12.0167	12.0661	12.0932	12.2437		11.8673		-0.00723272	-0.142117	0.14935	0.198785	0.225874	0.376352
30186007	1	2633.19	3155.66	5412.2	6609.18	5307.53	7048.82		11.3626	11.6237	12.402	12.6903	12.3738	12.7832		11.7961		-0.433511	-0.172382	0.605892	0.894148	0.577719	0.987061
30186007	1	5382.5	2907.85	6557.7	6601	5683.36	6821.98		12.3941	11.5057	12.679	12.6885	12.4725	12.736		12.1929		0.201137	-0.687187	0.48605	0.495543	0.279604	0.543049
30186007	1	7116.27	6169.31	6461.7	7342.58	9868.36	7431.37		12.7969	12.5909	12.6577	12.8421	13.2686	12.8594		12.6818		0.115073	-0.0909381	-0.0241347	0.160239	0.586763	0.17758
30186007	1	9758.54	4603.89	13481.2	8847.42	6545.7	8279.97		13.2524	12.1686	13.7187	13.111	12.6763	13.0154		13.0466		0.205868	-0.877945	0.672077	0.0644598	-0.37025	-0.031171
30186007	1	10875.2	8726.03	11701.2	12349.2	14448.6	14837.1		13.4088	13.0911	13.5144	13.5921	13.8186	13.8569		13.3381		0.0706746	-0.24697	0.176295	0.254051	0.480559	0.518842
30186007	1	12375.1	9763.55	13267.5	13545.9	14154.1	13931.5		13.5952	13.2532	13.6956	13.7256	13.7889	13.7661		13.5147		0.0805033	-0.261462	0.180958	0.21092	0.274276	0.251407
30186007	1	13013.1	10179.9	10089.2	15480.1	16638.5	17652.6		13.6677	13.3134	13.3005	13.9181	14.0222	14.1076		13.4272		0.240463	-0.113777	-0.126686	0.490919	0.595032	0.680384
30186007	1	28055.2	22746.1	28822.8	31535.8	30233.5	32607.5		14.776	14.4733	14.8149	14.9447	14.8839	14.9929		14.6881		0.0879027	-0.214745	0.126843	0.256624	0.19578	0.304836
30186007	1	41135.3	32889.4	48292.9	49004.6	48896.5	54505.8		15.3281	15.0053	15.5595	15.5806	15.5774	15.7341		15.2976		0.0304403	-0.292314	0.261874	0.282979	0.279793	0.436472
30186007	1	76721.1	48469.5	81614.5	76589.1	100459	82933.6		16.2273	15.5648	16.3165	16.2249	16.6162	16.3397		16.0362		0.191114	-0.471433	0.280318	0.188631	0.580023	0.303448
30186007	1	182366	115147	239086	217425	246720	252072		17.4765	16.8131	17.8672	17.7302	17.9125	17.9435		17.3856		0.0908893	-0.572471	0.481581	0.344567	0.526925	0.557887
30186020	1	6413.23	8041.78	7848.19	10485.7	10160.6	9532.58		12.6468	12.9733	12.9381	13.3561	13.3107	13.2187		12.8528		-0.205924	0.12054	0.0853841	0.503373	0.457936	0.365892
30186020	1	22275	22489.9	23904.6	19240.9	26294.8	26751.3		14.4431	14.457	14.545	14.2319	14.6825	14.7073		14.4817		-0.0385734	-0.0247188	0.0632922	-0.249822	0.200783	0.225612
30186071	1	2709.84	4120.9	6223.69	6166.83	4824.35	7284.45		11.404	12.0087	12.6036	12.5903	12.2361	12.8306		12.0054		-0.601436	0.00331253	0.598124	0.584884	0.230689	0.825173
30186082	1	1868.07	2205.54	3962.28	3007.09	2963.12	3916.39		10.8673	11.1069	11.9521	11.5542	11.5329	11.9353		11.3088		-0.441456	-0.201871	0.643326	0.245363	0.224116	0.626522
30186082	1	3463.25	6026.4	6419.17	6446.69	4965.5	8405.55		11.7579	12.5571	12.6482	12.6543	12.2777	13.0371		12.3211		-0.563143	0.236026	0.327117	0.333289	-0.0433311	0.716071
30186082	1	12495.9	11955.5	15879.4	9564.92	13537.1	17096.8		13.6092	13.5454	13.9549	13.2235	13.7246	14.0614		13.7031		-0.0939757	-0.157752	0.251728	-0.479606	0.0214883	0.358299
30186089	1	7310.65	11553.4	12190.8	12378.6	14892.1	11152.3		12.8358	13.496	13.5735	13.5956	13.8623	13.4451		13.3018		-0.46599	0.194261	0.271729	0.293784	0.560487	0.143279
30186092	1	3184.41	5819.04	10683.5	8238.42	11973.1	8036.03		11.6368	12.5066	13.3831	13.0082	13.5475	12.9723		12.5088		-0.872015	-0.00225708	0.874272	0.499328	1.03869	0.463443
30186092	1	42682.5	55335.8	93900.6	85429.6	93202.9	72787.5		15.3814	15.7559	16.5188	16.3824	16.5081	16.1514		15.8854		-0.50402	-0.129451	0.633472	0.497073	0.622711	0.266027
30186103	1	7103.15	10000.1	13435.1	13273.1	14984.5	14391		12.7942	13.2877	13.7137	13.6962	13.8712	13.8129		13.2652		-0.470988	0.0225026	0.448485	0.430983	0.605951	0.547644
30186103	1	36263.5	45458.1	55631.4	47504.1	51323.2	56265.4		15.1462	15.4723	15.7636	15.5358	15.6473	15.78		15.4607		-0.314466	0.0115527	0.302913	0.0750665	0.186625	0.319262
30186103	1	146032	140686	179399	177537	179748	154549		17.1559	17.1021	17.4528	17.4378	17.4556	17.2377		17.237		-0.0810302	-0.134828	0.215858	0.200812	0.218667	0.000751654
30186116	1	12567.4	11475	12303.3	13013.6	12481.5	13200.7		13.6174	13.4862	13.5868	13.6677	13.6075	13.6883		13.5635		0.0539464	-0.0772505	0.0233041	0.104284	0.0440507	0.12487
30186116	1	37836	34073.7	44164	53537.1	64929.6	45873.2		15.2075	15.0564	15.4306	15.7083	15.9866	15.4854		15.2315		-0.0240042	-0.175103	0.199107	0.476777	0.755114	0.25389
30186116	1	27247.1	48816.4	50313.6	66790.1	54033.3	67526		14.7338	15.5751	15.6187	16.0273	15.7216	16.0432		15.3092		-0.575369	0.265894	0.309475	0.718162	0.412375	0.733971
30186116	1	152401	166718	213529	229619	253082	260263		17.2175	17.3471	17.7041	17.8089	17.9492	17.9896		17.4229		-0.205365	-0.0758259	0.281191	0.386001	0.526368	0.566734
30186143	1	7947.49	5506.85	5980.52	4880.58	7308.1	8072.72		12.9563	12.427	12.5461	12.2528	12.8353	12.9788		12.6431		0.313167	-0.216105	-0.0970622	-0.390279	0.192165	0.335723
30186143	1	6780.24	5909.39	7289.71	6083.36	8037.93	12001		12.7271	12.5288	12.8316	12.5707	12.9726	13.5509		12.6959		0.0312681	-0.16706	0.135792	-0.1252	0.276755	0.855018
30186143	1	8654.07	8574.72	12651.9	10611.1	12575.7	13062.7		13.0792	13.0659	13.6271	13.3733	13.6184	13.6732		13.2574		-0.178205	-0.191495	0.3697	0.115925	0.360982	0.415799
30186143	1	16069.8	14714.3	25744.8	17702	15232.5	21800.7		13.9721	13.8449	14.652	14.1116	13.8949	14.4121		14.1563		-0.184265	-0.311398	0.495663	-0.0447074	-0.261466	0.255758
30186143	1	32226.3	35572.6	53916.8	35498.1	34239.9	50907.2		14.9759	15.1185	15.7184	15.1155	15.0634	15.6356		15.271		-0.295008	-0.152481	0.447489	-0.155504	-0.207566	0.364624
30186143	1	54287	44191.1	49473.6	45734.6	55423.9	57767.4		15.7283	15.4315	15.5944	15.481	15.7582	15.818		15.5847		0.143599	-0.15325	0.00965096	-0.103722	0.173501	0.233248
30186150	1	31851.5	86884.3	88552	105383	98070.6	81788.4		14.9591	16.4068	16.4342	16.6853	16.5815	16.3196		15.9334		-0.974299	0.473435	0.500864	0.751912	0.648161	0.386236
30186150	1	46153	119143	99251.1	123698	103058	136496		15.4941	16.8623	16.5988	16.9165	16.6531	17.0585		16.3184		-0.824286	0.543914	0.280373	0.598038	0.334668	0.740079
30186157	1	2384.26	3756.2	2570.18	4333.82	4340.07	2238.39		11.2193	11.8751	11.3277	12.0814	12.0835	11.1282		11.474		-0.254687	0.401047	-0.14636	0.607412	0.609489	-0.345767
30186157	1	2129.17	3244.95	4063.47	2940.27	4434.43	3458.22		11.0561	11.664	11.9885	11.5217	12.1145	11.7558		11.5695		-0.51344	0.0944627	0.418977	-0.0477878	0.545013	0.186297
30186157	1	2563.72	3136.14	3755.87	4385.85	4659.01	3306.92		11.324	11.6148	11.8749	12.0986	12.1858	11.6913		11.6046		-0.280554	0.0101995	0.270355	0.494065	0.581233	0.086695
30186157	1	23225.4	19511.9	19560.2	19070.1	20069.5	17401.5		14.5034	14.2521	14.2556	14.219	14.2927	14.0869		14.337		0.166377	-0.0849732	-0.0814039	-0.118014	-0.0443221	-0.250119
30186157	1	16512.1	23829.7	18495.3	19292.9	28586.9	21164.3		14.0112	14.5405	14.1749	14.2358	14.8031	14.3693		14.2422		-0.230957	0.29828	-0.0673229	-0.0064113	0.560868	0.127147
30186157	1	25152.6	27277	22714.6	25779.7	33526.3	28887.8		14.6184	14.7354	14.4713	14.6539	15.033	14.8182		14.6084		0.0100364	0.127015	-0.137052	0.0455637	0.424624	0.209789
30186157	1	32761.9	29156.6	31967.8	32506.7	37681.6	36504.6		14.9997	14.8315	14.9643	14.9884	15.2016	15.1558		14.9319		0.0678671	-0.100332	0.0324651	0.0565832	0.269708	0.223927
30186157	1	31795.1	37503.5	34044.3	31967.8	43961	30613.9		14.9565	15.1947	15.0551	14.9643	15.4239	14.9019		15.0688		-0.112275	0.125943	-0.0136672	-0.104463	0.355144	-0.166896
30186230	1	8306.33	9198.05	11148	17335.3	12232.5	12789.4		13.02	13.1671	13.4445	14.0814	13.5784	13.6427		13.2105		-0.190539	-0.0434225	0.233962	0.870894	0.367901	0.432128
30186230	1	34239.7	104968	74540.3	51241.9	58312.5	60514.6		15.0634	16.6796	16.1857	15.645	15.8315	15.885		15.9762		-0.912855	0.703358	0.209497	-0.331199	-0.144719	-0.0912398
30186283	1	50581.1	67682.3	89999.4	93214.4	91889.8	108202		15.6263	16.0465	16.4576	16.5083	16.4876	16.7234		16.0435		-0.417165	0.00301411	0.414151	0.464789	0.44414	0.679892
30186302	1	18597.2	15305.7	23165	20527.2	24635.6	21969.8		14.1828	13.9018	14.4997	14.3252	14.5885	14.4232		14.1947		-0.011948	-0.292964	0.304912	0.130503	0.393711	0.228489
30186302	1	34483.2	31443.8	37791.7	38227.4	45395.3	40198.6		15.0736	14.9405	15.2058	15.2223	15.4703	15.2949		15.0733		0.000314482	-0.132803	0.132489	0.149027	0.396961	0.221566
30186336	1	1592.72	1721.1	2891.65	1730.15	2061.49	2496.28		10.6373	10.7491	11.4977	10.7567	11.0095	11.2856		10.9614		-0.324081	-0.212243	0.536325	-0.204676	0.0481177	0.324208
30186336	1	1865.85	1817.97	1665.88	3067.82	2564.37	3536.95		10.8656	10.8281	10.7021	11.583	11.3244	11.7883		10.7986		0.0670212	0.0295118	-0.096533	0.7844	0.52579	0.98969
30186336	1	2349.75	7373.42	2743.84	5559.3	7038.1	7782.55		11.1983	12.8481	11.422	12.4407	12.781	12.926		11.8228		-0.624506	1.02532	-0.400815	0.617892	0.958174	1.10323
30186336	1	3730.15	4221.7	5666.63	4289.93	6373.51	4190.57		11.865	12.0436	12.4683	12.0667	12.6379	12.0329		12.1256		-0.260615	-0.0820253	0.34264	-0.0588968	0.512239	-0.0927028
30186336	1	8230.8	9850.77	10792	13740.6	14121.9	14278.7		13.0068	13.266	13.3977	13.7462	13.7856	13.8016		13.2235		-0.216689	0.0425148	0.174175	0.522651	0.562139	0.578073
30186336	1	10897.7	11920.9	10663.5	10606.7	14613.2	16330.6		13.4117	13.5412	13.3804	13.3727	13.835	13.9953		13.4444		-0.0327076	0.0967594	-0.0640518	-0.0717572	0.390542	0.55085
30186336	1	9216.07	11577.3	12981.3	11539.1	15859.8	12792.5		13.1699	13.499	13.6642	13.4942	13.9531	13.643		13.4444		-0.274428	0.0546412	0.219787	0.0498766	0.508719	0.19865
30186336	1	10184.7	12483.6	14845.2	12294.2	15588.1	15070.8		13.3141	13.6077	13.8577	13.5857	13.9282	13.8795		13.5932		-0.279072	0.0145558	0.264516	-0.00749909	0.334961	0.28628
30186336	1	14504.7	16199.1	23674.3	22292.6	21758.9	23417.1		13.8242	13.9836	14.531	14.4443	14.4093	14.5153		14.113		-0.28873	-0.129341	0.418071	0.331318	0.296357	0.402311
30186336	1	15266.5	14321.6	24087.8	21911	22647.5	20107.5		13.8981	13.8059	14.556	14.4194	14.4671	14.2954		14.0867		-0.188584	-0.280765	0.469348	0.332701	0.380395	0.208775
30186336	1	21693.9	20456.3	24924.5	30652.6	27720	31609.9		14.405	14.3203	14.6053	14.9037	14.7586	14.9481		14.4435		-0.0385088	-0.123254	0.161762	0.460209	0.315126	0.504574
30186336	1	21380.6	27866.9	38297.8	30810.2	31864.7	38653.4		14.384	14.7663	15.225	14.9111	14.9597	15.2383		14.7918		-0.407735	-0.0254854	0.43322	0.119369	0.16792	0.446556
30186336	1	25648.5	29100.4	34672.6	33281.6	42717.5	38839.8		14.6466	14.8288	15.0815	15.0224	15.3825	15.2452		14.8523		-0.205695	-0.0235292	0.229225	0.170153	0.530255	0.392964
30186336	1	41973.3	53015.9	68309.3	77831.6	61400.1	75751		15.3572	15.6941	16.0598	16.2481	15.906	16.209		15.7037		-0.346521	-0.00956831	0.356089	0.544363	0.202249	0.505271
30186336	1	144123	166278	150521	184824	228061	187291		17.1369	17.3432	17.1996	17.4958	17.7991	17.5149		17.2266		-0.0896507	0.116639	-0.0269879	0.269197	0.572463	0.288325
30186351	1	7047.25	23229.2	12363.2	39059.7	53578.5	3423.05		12.7828	14.5037	13.5938	15.2534	15.7094	11.7411		13.6268		-0.843907	0.876898	-0.0329907	1.62664	2.08261	-1.88568
30186351	1	8235.17	13887.6	15690.5	12592.3	14750.3	11329.8		13.0076	13.7615	13.9376	13.6203	13.8485	13.4678		13.5689		-0.561317	0.192611	0.368705	0.0513536	0.279553	-0.101066
30186351	1	7202.56	14920.2	21132.6	14892.8	14142.6	13765.7		12.8143	13.865	14.3672	13.8623	13.7878	13.7488		13.6822		-0.867859	0.182825	0.685034	0.180171	0.105612	0.0666338
30186351	1	11707.7	15815.2	19482.6	21979.7	19391.6	25303		13.5152	13.949	14.2499	14.4239	14.2431	14.627		13.9047		-0.389525	0.0443243	0.345201	0.519188	0.338448	0.722323
30186351	1	25103	35811.3	30783.1	46634.7	51218	28867.9		14.6156	15.1281	14.9099	15.5091	15.6444	14.8172		14.8845		-0.268946	0.243612	0.0253338	0.624599	0.759847	-0.067339
30186351	1	16780.9	27030.4	29862.6	38132	37985.1	34467.1		14.0345	14.7223	14.8661	15.2187	15.2131	15.0729		14.541		-0.506426	0.181334	0.325092	0.677752	0.672184	0.531971
30186351	1	48372	49332.5	52077.3	57641.6	60822.3	61126.9		15.5619	15.5902	15.6684	15.8148	15.8923	15.8995		15.6068		-0.0449504	-0.0165837	0.0615341	0.20799	0.285478	0.292687
30186351	1	247384	227213	308961	246664	466182	212751		17.9164	17.7937	18.2371	17.9122	18.8305	17.6988		17.9824		-0.0659898	-0.188696	0.254686	-0.070195	0.848153	-0.283573
30186363	1	2787.07	4077.53	3839.39	5311.75	4492.14	5765.61		11.4445	11.9935	11.9067	12.375	12.1332	12.4933		11.7816		-0.337025	0.21192	0.125105	0.593412	0.351628	0.7117
30186363	1	4968.93	8053.84	7664.57	6156.7	4563.39	9210.16		12.2787	12.9755	12.904	12.5879	12.1559	13.169		12.7194		-0.44067	0.256071	0.184599	-0.131448	-0.5635	0.449621
30186363	1	7010.14	7236.1	7237.91	8485.7	10830.7	8730.23		12.7752	12.821	12.8214	13.0508	13.4028	13.0918		12.8059		-0.0306334	0.0151373	0.0154961	0.244958	0.596974	0.285944
30186363	1	8074.79	7089.09	11960.3	12547.3	10445.8	14365.7		12.9792	12.7914	13.546	13.6151	13.3506	13.8103		13.1055		-0.126309	-0.314134	0.440443	0.509571	0.245117	0.704823
30186363	1	8848.33	9490.56	18292.8	15327.9	14570.5	16133.2		13.1112	13.2123	14.159	13.9039	13.8308	13.9777		13.4942		-0.382962	-0.281873	0.664834	0.409721	0.33661	0.483593
30186363	1	23587.8	28135.4	37332.4	41720.9	38291.9	43886.3		14.5258	14.7801	15.1881	15.3485	15.2248	15.4215		14.8313		-0.305576	-0.0512316	0.356807	0.517152	0.393418	0.590151
30186363	1	37945.2	58748.3	65978.1	89951.7	74958.5	55235.7		15.2116	15.8423	16.0097	16.4569	16.1938	15.7533		15.6879		-0.476234	0.154398	0.321836	0.769	0.505941	0.0654511
30186363	1	105946	114230	170731	177373	133566	198931		16.693	16.8016	17.3814	17.4364	17.0272	17.6019		16.9586		-0.26567	-0.157053	0.422722	0.47779	0.0685519	0.643267
30186363	1	147481	137595	132631	130920	128270	202550		17.1702	17.0701	17.0171	16.9983	16.9688	17.6279		17.0858		0.0844025	-0.0156953	-0.0687071	-0.0874436	-0.116941	0.54215
30186363	1	239097	295124	440000	440493	393232	482557		17.8672	18.171	18.7471	18.7488	18.585	18.8803		18.2618		-0.394544	-0.0908182	0.485362	0.486979	0.323239	0.61856
30186363	1	312397	406524	461316	501150	361112	563401		18.253	18.633	18.8154	18.9349	18.4621	19.1038		18.5671		-0.314112	0.0658487	0.248263	0.367749	-0.105046	0.536669
30186366	1	4102.41	4771.44	5321.77	4728.73	6380.69	3850.65		12.0023	12.2202	12.3777	12.2072	12.6395	11.9109		12.2001		-0.197795	0.0201564	0.177638	0.007186	0.439446	-0.289164
30186366	1	8503.81	9526.01	12100.1	10896.7	10160.2	11449		13.0539	13.2177	13.5627	13.4116	13.3106	13.4829		13.2781		-0.2242	-0.060438	0.284638	0.133513	0.0325543	0.204844
30186366	1	5866.42	9345.39	12264.1	9509.68	8149.83	11262.8		12.5183	13.19	13.5822	13.2152	12.9926	13.4593		13.0968		-0.578556	0.0932184	0.485338	0.118361	-0.104267	0.362461
30186366	1	15889.3	18429	18080.3	18190.1	21407.5	18311.7		13.9558	14.1697	14.1421	14.1509	14.3858	14.1605		14.0892		-0.133429	0.0804966	0.0529328	0.0616681	0.296636	0.0712819
30186366	1	16102.6	22726.2	21745.5	25790.7	30921.1	20098.3		13.975	14.4721	14.4084	14.6546	14.9163	14.2948		14.2852		-0.310163	0.186901	0.123263	0.369397	0.631134	0.0096154
30186378	1	22417.7	35174.1	24565.2	41950.9	63847.8	19751.1		14.4524	15.1022	14.5843	15.3564	15.9623	14.2696		14.713		-0.260619	0.389258	-0.128639	0.643444	1.24938	-0.443321
30186378	1	10717.3	8425.3	16788.9	12120.2	13331.6	15459.9		13.3877	13.0405	14.0352	13.5651	13.7026	13.9162		13.4878		-0.100143	-0.447281	0.547425	0.0773336	0.214764	0.428447
30186378	1	22828.3	27308.8	29458.4	30161.4	32831.4	38865.9		14.4785	14.7371	14.8464	14.8804	15.0028	15.2462		14.6873		-0.2088	0.0497438	0.159056	0.193083	0.315454	0.558885
30186378	1	24960.4	25041.2	33233.1	25238.9	31278.8	39048.4		14.6074	14.612	15.0203	14.6234	14.9329	15.253		14.7466		-0.139213	-0.13455	0.273763	-0.123209	0.186328	0.506408
30186379	1	64950.9	75573.3	82501.2	93793.1	95201.5	72618.1		15.9871	16.2056	16.3321	16.5172	16.5387	16.148		16.1749		-0.187863	0.0306628	0.157201	0.342268	0.363771	-0.026885
30186382	1	26952.7	27707.3	30235.5	25873	35632.1	35093.1		14.7181	14.758	14.884	14.6592	15.1209	15.0989		14.7867		-0.0685506	-0.0287124	0.0972631	-0.127535	0.334199	0.312206
30186382	1	41151.8	45855.2	58851.8	58683.2	61630.9	50333.4		15.3287	15.4848	15.8448	15.8407	15.9114	15.6192		15.5528		-0.224086	-0.0679575	0.292043	0.287906	0.358612	0.066473
30186387	1	2778.49	4055.34	6030.95	4669.95	4419.85	5890.25		11.4401	11.9856	12.5582	12.1892	12.1098	12.5241		11.9946		-0.554535	-0.00901294	0.563548	0.194569	0.11516	0.529492
30186387	1	9646.19	13400.1	12863.3	14445.5	13908.9	18087.9		13.2357	13.71	13.651	13.8183	13.7637	14.1427		13.5322		-0.296482	0.177732	0.11875	0.28611	0.231491	0.610516
30186390	1	3797.61	4547.52	2369.65	4337.43	2518.99	6565.27		11.8909	12.1509	11.2105	12.0826	11.2986	12.6806		11.7507		0.140141	0.400132	-0.540273	0.33189	-0.452104	0.929905
30186398	1	88417.9	28339.6	33877.6	40125.4	59866.4	63355.2		16.4321	14.7905	15.048	15.2922	15.8695	15.9512		15.4235		1.00851	-0.63301	-0.375499	-0.131315	0.445916	0.527633
30186406	1	3880.1	6658.11	7206.44	8546.09	5877.56	11621.5		11.9219	12.7009	12.8151	13.061	12.521	13.5045		12.4793		-0.557403	0.221614	0.335788	0.581766	0.0417206	1.02522
30186406	1	7254.06	7584.77	9785.88	7210.85	9805.32	17074		12.8246	12.8889	13.2565	12.816	13.2593	14.0595		12.99		-0.165409	-0.101094	0.266503	-0.17403	0.269366	1.06953
30186437	1	1430.61	3323.6	1850.66	2745.68	4109.02	2073.74		10.4824	11.6985	10.8538	11.4229	12.0046	11.018		11.0116		-0.529174	0.686942	-0.157767	0.411359	0.99299	0.00643336
30186437	1	3154.18	3793.35	4443.44	4256.19	5595.57	3210.77		11.623	11.8893	12.1175	12.0553	12.4501	11.6487		11.8766		-0.25354	0.012669	0.240871	0.178758	0.57348	-0.227886
30186437	1	3217.02	5386	4920.78	7140.24	6026.8	5762.78		11.6515	12.395	12.2647	12.8018	12.5572	12.4925		12.1037		-0.452216	0.291273	0.160944	0.69803	0.45345	0.388822
30186437	1	10038.1	9764.13	13118.9	11574.2	14652.7	10466.2		13.2932	13.2533	13.6794	13.4986	13.8389	13.3534		13.4086		-0.115412	-0.155334	0.270746	0.0900194	0.430273	-0.0551606
30186437	1	6355.61	10358.9	12526.1	9722.67	19004.7	8324.48		12.6338	13.3386	13.6126	13.2471	14.2141	13.0231		13.195		-0.561199	0.143568	0.417631	0.0521236	1.01905	-0.171869
30186437	1	11039.1	16335.9	20919.3	12835.9	27299.4	12994.3		13.4303	13.9958	14.3525	13.6479	14.7366	13.6656		13.9262		-0.495878	0.0695435	0.426334	-0.278316	0.810367	-0.260626
30186446	1	4227.81	14023	12779.3	16492.3	12663.5	19251.7		12.0457	13.7755	13.6415	14.0095	13.6284	14.2327		13.1542		-1.10855	0.621267	0.487281	0.855264	0.474141	1.07845
30186446	1	10701.3	13334.2	16081.9	25413.1	24138.6	29269.4		13.3855	13.7028	13.9732	14.6333	14.5591	14.8371		13.6872		-0.301669	0.0156796	0.285989	0.946122	0.871891	1.14994
30186446	1	16715.1	17915.5	21173	25294.2	24721.6	30492.2		14.0289	14.1289	14.3699	14.6265	14.5935	14.8962		14.1759		-0.147042	-0.0469889	0.194031	0.450611	0.417575	0.720245
30186446	1	21404.6	24150.6	31667	36535.9	34670.8	38084.7		14.3856	14.5598	14.9507	15.157	15.0814	15.2169		14.632		-0.246401	-0.0722606	0.318662	0.524992	0.449401	0.584893
30186446	1	23436.3	27491.9	32140.1	39685.3	36854.9	55894.8		14.5165	14.7467	14.9721	15.2763	15.1696	15.7704		14.7451		-0.228631	0.00163177	0.227	0.531231	0.424485	1.02534
30186446	1	16451	27410.5	34237.4	47023.2	46861.3	62696		14.0059	14.7424	15.0633	15.5211	15.5161	15.9361		14.6039		-0.597985	0.138571	0.459414	0.917214	0.912237	1.33222
30186446	1	32090.6	37136.1	44314.6	63323.9	51891.3	81897.4		14.9699	15.1805	15.4355	15.9505	15.6632	16.3215		15.1953		-0.225433	-0.0147642	0.240197	0.755166	0.467908	1.12623
30186446	1	41101.8	81401.6	117026	151948	126440	224333		15.3269	16.3128	16.8365	17.2132	16.9481	17.7753		16.1587		-0.831804	0.154052	0.677752	1.0545	0.789381	1.61657
30186465	1	4978.23	5720.47	4985.45	9210.33	8284.95	9586.9		12.2814	12.4819	12.2835	13.169	13.0163	13.2268		12.3489		-0.0675311	0.132971	-0.0654398	0.820089	0.667328	0.8779
30186471	1	1497.81	3032.58	1894.18	2322.87	2085.18	1867.3		10.5486	11.5663	10.8874	11.1817	11.026	10.8667		11.0008		-0.452137	0.565555	-0.113418	0.180918	0.0251833	-0.134037
30186471	1	2612.35	2446.01	2881.65	2331.95	3124.14	3560.67		11.3511	11.2562	11.4927	11.1873	11.6092	11.7979		11.3667		-0.0155422	-0.110462	0.126004	-0.179354	0.24257	0.431258
30186471	1	1666.76	1635.97	2621.83	3197.51	2085.73	3246.69		10.7028	10.6759	11.3564	11.6427	11.0263	11.6648		10.9117		-0.208873	-0.235778	0.444651	0.731025	0.11463	0.753047
30186471	1	3110.34	3333.23	1773.9	2552.85	1866.89	3094.47		11.6029	11.7027	10.7927	11.3179	10.8664	11.5955		11.3661		0.236767	0.336617	-0.573384	-0.0481971	-0.49967	0.229387
30186471	1	4429.37	3542.03	2947.01	4854.27	4152.27	4322.73		12.1129	11.7904	11.525	12.245	12.0197	12.0777		11.8094		0.303459	-0.0190674	-0.284391	0.43561	0.210257	0.2683
30186471	1	3111.97	2413.6	3591.97	1773.65	2202.77	1682.69		11.6036	11.237	11.8106	10.7925	11.1051	10.7166		11.5504		0.0532311	-0.313409	0.260178	-0.757877	-0.445276	-0.833829
30186471	1	11218.9	21225.3	22553.4	22217.9	25337.3	29717.2		13.4536	14.3735	14.4611	14.4394	14.629	14.859		14.0961		-0.642419	0.277431	0.364988	0.343366	0.532905	0.762941
30186471	1	33973	35988.2	41625.3	37772.8	46740.5	38327.5		15.0521	15.1352	15.3452	15.2051	15.5124	15.2261		15.1775		-0.125404	-0.0422658	0.16767	0.0275554	0.334883	0.0485902
30186471	1	55122.4	46075.3	67449.1	55195.4	67875.7	65011.7		15.7504	15.4917	16.0415	15.7523	16.0506	15.9884		15.7612		-0.0108375	-0.269485	0.280322	-0.00892958	0.289417	0.227222
30186489	1	4273.99	3548.84	3354.74	4730.01	3866.06	5530.27		12.0614	11.7931	11.712	12.2076	11.9166	12.4331		11.8555		0.205872	-0.0623627	-0.143509	0.352134	0.0611527	0.57764
30186489	1	2709.52	2790.87	2380.45	2400.8	4790.02	3614.68		11.4038	11.4465	11.217	11.2293	12.2258	11.8197		11.3558		0.0480399	0.0907188	-0.138759	-0.126479	0.870038	0.463871
30186489	1	10461.8	12067.3	15265.8	16085	15628.2	16477		13.3528	13.5588	13.898	13.9734	13.9319	14.0082		13.6032		-0.250384	-0.0444075	0.294792	0.370205	0.328644	0.404941
30186489	1	10239.6	15653.2	14202.6	16038	15838.6	14534.8		13.3219	13.9342	13.7939	13.9692	13.9512	13.8272		13.6833		-0.361434	0.250869	0.110565	0.2859	0.26785	0.143919
30186489	1	14719.8	12373.2	18785.2	20604.9	19309.3	22443.9		13.8455	13.5949	14.1973	14.3307	14.237	14.454		13.8792		-0.0337635	-0.284309	0.318073	0.451462	0.357769	0.574797
30186489	1	20576.1	28782.9	33667.1	26852.2	29827.4	37339.8		14.3287	14.8129	15.039	14.7128	14.8644	15.1884		14.7269		-0.398204	0.0860391	0.312165	-0.0141301	0.137466	0.461542
30186489	1	46470.8	74321	75086.4	75162.1	91911.4	80738		15.504	16.1815	16.1963	16.1977	16.488	16.301		15.9606		-0.456558	0.220888	0.235669	0.237122	0.527361	0.340365
30186498	1	11305.6	11447.8	11742.8	11525.7	10808.4	17085.5		13.4647	13.4828	13.5195	13.4926	13.3999	14.0605		13.489		-0.0242574	-0.0062196	0.030477	0.00355908	-0.0891354	0.571479
30186509	1	2272.4	3466.44	4027.16	3196.93	5457.3	6013.82		11.15	11.7592	11.9755	11.6425	12.414	12.5541		11.6283		-0.478261	0.130977	0.347284	0.0142089	0.785708	0.925803
30186509	1	4770.69	4894.02	5997.21	7700.04	8115.88	9917.13		12.22	12.2568	12.5501	12.9106	12.9865	13.2757		12.3423		-0.122306	-0.0854833	0.207789	0.568363	0.644244	0.93342
30186509	1	11738.6	30787	32073.6	32980.1	29820.2	30205.3		13.519	14.91	14.9691	15.0093	14.864	14.8825		14.466		-0.947064	0.443999	0.503065	0.543271	0.397966	0.416479
30186509	1	17217.5	32447.2	25218.5	30136	35301.9	35275.5		14.0716	14.9858	14.6222	14.8792	15.1075	15.1064		14.5599		-0.488277	0.425945	0.0623317	0.319336	0.547595	0.546515
30186509	1	49308.7	69247.9	66168.6	76778	81410.2	74629.6		15.5896	16.0795	16.0139	16.2284	16.3129	16.1875		15.8943		-0.304744	0.185184	0.11956	0.334107	0.418623	0.293161
30186523	1	34476.3	18220.5	42381	20015.8	32950.2	26498		15.0733	14.1533	15.3711	14.2889	15.008	14.6936		14.8659		0.207411	-0.712633	0.505222	-0.577057	0.142094	-0.172309
30186531	1	14374.7	10979.5	18812.7	14421.7	17691.9	19857.7		13.8112	13.4225	14.1994	13.816	14.1108	14.2774		13.8111		0.000183013	-0.388542	0.388359	0.00489127	0.299742	0.466349
30186533	1	2836.2	2956.79	2449.78	3206.91	2894.23	3172.84		11.4697	11.5298	11.2584	11.647	11.499	11.6316		11.4193		0.0504124	0.110483	-0.160895	0.227634	0.079632	0.212228
30186533	1	6667.46	12693.1	12136.4	10618.7	12202.1	11188.7		12.7029	13.6318	13.567	13.3743	13.5748	13.4497		13.3006		-0.597654	0.331181	0.266473	0.0737475	0.274271	0.149174
30186533	1	11931.1	22282.4	20992.9	20939.6	22294.6	21794.3		13.5424	14.4436	14.3576	14.3539	14.4444	14.4117		14.1146		-0.572118	0.32906	0.243058	0.239395	0.329853	0.297109
30186533	1	16739.3	19685.8	20211.3	21569.8	28215.6	22898.6		14.0309	14.2649	14.3029	14.3967	14.7842	14.483		14.1996		-0.168615	0.0653041	0.103311	0.19716	0.58464	0.283409
30186533	1	26655.4	45109.6	43360.4	36853.7	50661.9	42731		14.7021	15.4611	15.4041	15.1695	15.6286	15.383		15.1891		-0.486984	0.27202	0.214964	-0.0196042	0.439489	0.19387
30186533	1	31752.6	41969.8	48150.1	44909.8	39669.1	47734.7		14.9546	15.3571	15.5553	15.4547	15.2757	15.5427		15.289		-0.334379	0.0680969	0.266283	0.165776	-0.013239	0.253782
30186533	1	40308.5	43590.4	46759.7	48443.6	47734.6	55722.4		15.2988	15.4117	15.513	15.564	15.5427	15.766		15.4078		-0.109034	0.00388937	0.105145	0.156186	0.134914	0.358139
30186554	1	30436.2	52676.1	50546.6	62008.8	51925.1	61258.5		14.8935	15.6849	15.6253	15.9202	15.6641	15.9026		15.4012		-0.507729	0.283633	0.224097	0.518957	0.262916	0.501393
30186575	1	33312.1	55441.2	60384.4	63841	59295.4	64818.3		15.0238	15.7587	15.8819	15.9622	15.8556	15.9841		15.5548		-0.531015	0.203899	0.327116	0.407423	0.30086	0.429342
30186575	1	32604.1	50603.3	54932.3	64127.2	58699.5	55450.7		14.9928	15.6269	15.7454	15.9686	15.8411	15.7589		15.455		-0.462261	0.171918	0.290343	0.513623	0.386037	0.303893
30186590	1	10564.4	10307.6	12115.4	9105.89	8703.84	16592.9		13.3669	13.3314	13.5646	13.1526	13.0874	14.0183		13.421		-0.0540435	-0.089544	0.143588	-0.268385	-0.333533	0.597306
30186590	1	8324.76	10085	6739.69	9478.12	8970.72	12727.8		13.0232	13.2999	12.7185	13.2104	13.131	13.6357		13.0139		0.00933303	0.286061	-0.295394	0.196526	0.117149	0.621838
30186590	1	8325.37	13779	12824.2	14135.1	11387	20084.8		13.0233	13.7502	13.6466	13.787	13.4751	14.2938		13.4734		-0.450055	0.276828	0.173227	0.313638	0.00175117	0.820461
30186590	1	16093	15308.6	21947.7	19965	20818.2	26802.4		13.9741	13.9021	14.4218	14.2852	14.3456	14.7101		14.0993		-0.12518	-0.197275	0.322455	0.185862	0.246228	0.610749
30186590	1	13053	19846	23687.7	21209.2	19375.4	27311.4		13.6721	14.2766	14.5318	14.3724	14.2419	14.7372		14.1602		-0.488079	0.116397	0.371682	0.212233	0.0817681	0.57705
30186590	1	12003.3	16876	20612.8	20204.2	17570.1	31625.2		13.5511	14.0427	14.3313	14.3024	14.1008	14.9488		13.975		-0.423886	0.0676588	0.356227	0.327344	0.125809	0.973762
30186590	1	27383.1	29775.8	29406.5	26873.9	28393.4	36365.8		14.741	14.8619	14.8438	14.7139	14.7933	15.1503		14.8156		-0.0745689	0.046287	0.0282819	-0.101649	-0.0223005	0.334728
30186590	1	23401.4	35281.6	41731.7	41526.3	29741.1	49860.5		14.5143	15.1066	15.3489	15.3417	14.8602	15.6056		14.9899		-0.475622	0.116699	0.358924	0.351808	-0.129759	0.615677
30186590	1	37511.5	32368.2	32525.4	32081.7	31741	47023.2		15.195	14.9823	14.9893	14.9695	14.9541	15.5211		15.0555		0.139507	-0.0732497	-0.0662573	-0.0860739	-0.101478	0.465547
30186590	1	23974.2	43400	41594.7	40916.6	34575.2	55469.4		14.5492	15.4054	15.3441	15.3204	15.0774	15.7594		15.0996		-0.550379	0.305837	0.244542	0.220829	-0.0221216	0.659834
30186590	1	63877.6	49832.3	61184.7	66621.8	36232	82344.2		15.963	15.6048	15.9009	16.0237	15.145	16.3294		15.8229		0.140123	-0.218106	0.0779829	0.200806	-0.677924	0.50648
30186590	1	87981	57998.5	71716.6	71945.2	72644.7	110101		16.4249	15.8237	16.13	16.1346	16.1486	16.7485		16.1262		0.298687	-0.302489	0.00380238	0.00839317	0.0223527	0.622246
30186590	1	59959.9	88302.9	66443.7	88841	60618.6	125898		15.8717	16.4302	16.0198	16.4389	15.8875	16.9419		16.1072		-0.235533	0.322931	-0.0873977	0.331696	-0.219771	0.834652
30186590	1	74172.1	109681	120923	121288	71110.8	159125		16.1786	16.743	16.8837	16.8881	16.1178	17.2798		16.6018		-0.423169	0.141196	0.281973	0.286316	-0.483976	0.67804
30186590	1	213981	217907	178385	190254	139577	272215		17.7071	17.7334	17.4446	17.5376	17.0907	18.0544		17.6284		0.0787508	0.104984	-0.183735	-0.0908039	-0.537672	0.426018
30186590	1	307457	479252	428805	508797	339819	541138		18.23	18.8704	18.71	18.9567	18.3744	19.0456		18.6035		-0.373446	0.266954	0.106492	0.35326	-0.229065	0.442165
30186596	1	10128.5	15494.5	24265.5	11080.3	11324.6	16182.9		13.3061	13.9195	14.5666	13.4357	13.4672	13.9822		13.9307		-0.624609	-0.0112695	0.635878	-0.495032	-0.463572	0.0514458
30186601	1	2009.9	3769.62	3945.72	6955.04	5791.92	6865.83		10.9729	11.8802	11.9461	12.7638	12.4998	12.7452		11.5997		-0.626819	0.280473	0.346346	1.16411	0.900098	1.14549
30186601	1	2122.26	2667.41	2761.04	3104.52	3083.6	3410.57		11.0514	11.3812	11.431	11.6002	11.5904	11.7358		11.2879		-0.236481	0.0933547	0.143126	0.312284	0.30253	0.447929
30186601	1	24231.9	26915.3	28449.2	38314.3	42612.9	27306.5		14.5646	14.7161	14.7961	15.2256	15.379	14.737		14.6923		-0.127668	0.0238524	0.103816	0.533308	0.686716	0.04467
30186601	1	31781	34633.4	40239.6	45349.5	45245.8	42570.8		14.9559	15.0799	15.2963	15.4688	15.4655	15.3776		15.1107		-0.154817	-0.0308165	0.185633	0.358106	0.354801	0.266882
30186601	1	33968.7	42995.2	46175	49591.1	51489.5	47838.2		15.0519	15.3919	15.4948	15.5978	15.652	15.5459		15.3129		-0.260958	0.0790118	0.181946	0.284917	0.339114	0.232997
30186601	1	260194	234016	323793	349161	331349	406250		17.9892	17.8362	18.3047	18.4135	18.338	18.632		18.0434		-0.0541687	-0.207149	0.261317	0.370137	0.294597	0.588612
30186607	1	13550.5	10762.4	15392.7	11547.9	14105.6	14529		13.7261	13.3937	13.91	13.4953	13.784	13.8266		13.6766		0.0494874	-0.282867	0.23338	-0.181228	0.107408	0.150074
30186647	1	3699.47	10193.7	17272.2	14491.9	6279.79	8269.75		11.8531	13.3154	14.0762	13.823	12.6165	13.0136		13.0815		-1.22845	0.233835	0.994611	0.741409	-0.465049	-0.0679219
30186647	1	11843	17132.6	22608.8	19791.7	14123.6	16132.9		13.5317	14.0645	14.4646	14.2726	13.7858	13.9777		14.0203		-0.48852	0.0441921	0.444328	0.25234	-0.234442	-0.0425502
30186647	1	28353.6	85076.2	128523	79080.2	48022.7	60926.2		14.7912	16.3765	16.9717	16.271	15.5514	15.8948		16.0465		-1.25522	0.330009	0.925206	0.224569	-0.495032	-0.151683
30186647	1	38915.9	109330	125509	81839.3	58217.3	80873.9		15.2481	16.7383	16.9374	16.3205	15.8292	16.3034		16.3079		-1.05987	0.430385	0.629485	0.0125646	-0.478783	-0.00455613
30186665	1	4131.38	4837.87	6574.29	7504.75	6173.51	6787.32		12.0124	12.2402	12.6826	12.8736	12.5919	12.7286		12.3117		-0.29932	-0.0715729	0.370893	0.561861	0.280146	0.416898
30186665	1	5514.67	6808.38	10500.1	6719.12	9427.54	6403.74		12.4291	12.7331	13.3581	12.7141	13.2027	12.6447		12.8401		-0.411032	-0.106996	0.518028	-0.126035	0.362574	-0.195392
30186665	1	9192.41	29173.1	17531.7	47629.9	65434.9	12454.2		13.1662	14.8323	14.0977	15.5396	15.9978	13.6043		14.0321		-0.865857	0.800265	0.0655917	1.5075	1.96569	-0.427743
30186665	1	5526.19	8221.31	8955	10660.5	8398.3	11750.9		12.4321	13.0052	13.1285	13.38	13.0359	13.5205		12.8552		-0.423164	0.149919	0.273245	0.524758	0.180648	0.665252
30186665	1	5110.75	4557.89	8905.96	10054.7	6735.95	8388.1		12.3193	12.1541	13.1206	13.2956	12.7177	13.0341		12.5313		-0.212023	-0.377191	0.589214	0.764243	0.186324	0.502787
30186665	1	5357.05	8004.24	7490.42	10914.7	11424	12391.2		12.3872	12.9665	12.8708	13.414	13.4798	13.597		12.7415		-0.354311	0.225014	0.129297	0.672454	0.738251	0.855496
30186665	1	7945.92	5737.37	10051	7344.66	6203.31	11005.7		12.956	12.4862	13.2951	12.8425	12.5988	13.426		12.9124		0.0435884	-0.426236	0.382647	-0.0699301	-0.313587	0.513551
30186665	1	7594.68	10655.4	13799.2	16152.1	14963.9	15600.5		12.8908	13.3793	13.7523	13.9794	13.8692	13.9293		13.3408		-0.450017	0.0385051	0.411512	0.638642	0.528412	0.588512
30186665	1	9600.4	10389.7	11498.5	12003.3	9754.12	12696.2		13.2289	13.3429	13.4892	13.5511	13.2518	13.6321		13.3536		-0.124757	-0.0107659	0.135523	0.197504	-0.10184	0.278476
30186665	1	7343.17	8521.57	14670	15362.4	13081.5	18720.9		12.8422	13.0569	13.8406	13.9071	13.6752	14.1924		13.2466		-0.40437	-0.189653	0.594024	0.660558	0.428684	0.945806
30186665	1	3637.81	10549.6	15850.2	15565.5	10915.9	18025.7		11.8289	13.3649	13.9522	13.9261	13.4141	14.1378		13.0487		-1.2198	0.316242	0.903558	0.87741	0.365484	1.08911
30186665	1	9431.68	9634.47	15205.3	15313.3	14514.3	16017.9		13.2033	13.234	13.8923	13.9025	13.8252	13.9674		13.4432		-0.239893	-0.209202	0.449094	0.459303	0.381997	0.524201
30186665	1	6916.62	8454.3	10739.8	13502.4	13429.4	16538.6		12.7559	13.0455	13.3907	13.7209	13.7131	14.0135		13.064		-0.308148	-0.018529	0.326677	0.656926	0.649107	0.949551
30186665	1	7940.59	9640.99	15208.9	13123.7	11684.1	13966.4		12.955	13.235	13.8926	13.6799	13.5123	13.7697		13.3609		-0.405843	-0.125909	0.531753	0.319011	0.151379	0.408795
30186665	1	10077.3	9407.83	16026.6	13901.1	17048.3	14497.3		13.2988	13.1996	13.9682	13.7629	14.0573	13.8235		13.4889		-0.190065	-0.289233	0.479298	0.27403	0.568462	0.334613
30186665	1	9187.32	12800.2	18163.2	16174.6	15875.2	20918.9		13.1654	13.6439	14.1487	13.9814	13.9545	14.3525		13.6527		-0.487251	-0.00880312	0.496054	0.328763	0.30181	0.699838
30186665	1	12114.8	17270.8	21994.1	23598.5	19160.4	25378.1		13.5645	14.076	14.4248	14.5264	14.2258	14.6313		14.0218		-0.457302	0.0542572	0.403044	0.504622	0.204057	0.609509
30186665	1	44352.4	14844.6	33651.1	14048.9	51437.3	18658.3		15.4367	13.8576	15.0384	13.7782	15.6505	14.1875		14.7776		0.659144	-0.91993	0.260786	-0.999414	0.872947	-0.59005
30186665	1	20978.3	16166	24963.2	30351	21960.4	35571.3		14.3566	13.9807	14.6075	14.8895	14.4226	15.1184		14.3149		0.0416758	-0.334259	0.292583	0.574521	0.107686	0.803494
30186665	1	17608.5	19975.6	31948.6	25583.1	24564.8	31579.3		14.104	14.286	14.9635	14.6429	14.5843	14.9467		14.4511		-0.347153	-0.165181	0.512334	0.191768	0.133174	0.495557
30186665	1	15189.4	14712.6	35853.4	29096.9	24724.4	34482.6		13.8908	13.8448	15.1298	14.8286	14.5936	15.0736		14.2885		-0.397676	-0.443689	0.841365	0.54012	0.305193	0.785127
30186665	1	16810.5	21088.6	26985.2	27335.7	26111.5	28874.9		14.0371	14.3642	14.7199	14.7385	14.6724	14.8175		14.3737		-0.336634	-0.00953786	0.346172	0.364787	0.298686	0.443818
30186665	1	17050.8	23763.6	31878.6	22520.4	28153.8	32315.1		14.0576	14.5365	14.9603	14.4589	14.781	14.9799		14.5181		-0.460554	0.01836	0.442194	-0.0591612	0.262935	0.461812
30186665	1	19034.7	15646.5	31218.3	30274.2	29895.6	35761.5		14.2163	13.9336	14.9301	14.8858	14.8676	15.1261		14.36		-0.143654	-0.42645	0.570104	0.525802	0.507647	0.766121
30186665	1	31904.9	51454.6	54712.5	63227.7	75000.6	38634.5		14.9615	15.651	15.7396	15.9483	16.1946	15.2376		15.4507		-0.489206	0.200319	0.288887	0.497573	0.74392	-0.213094
30186665	1	25493.8	24440	38956.8	29663.8	38513.7	42877.9		14.6379	14.577	15.2496	14.8564	15.2331	15.3879		14.8215		-0.183608	-0.244512	0.42812	0.034949	0.411616	0.566479
30186665	1	19938.5	26030.6	28480.6	34222.8	32537.2	38191.6		14.2833	14.6679	14.7977	15.0627	14.9898	15.221		14.583		-0.29969	0.0849607	0.21473	0.479709	0.40684	0.638007
30186665	1	21472.9	30507.5	48491	50949.5	37000.2	54794		14.3902	14.8969	15.5654	15.6368	15.1752	15.7417		14.9508		-0.560615	-0.0539687	0.614584	0.685935	0.2244	0.790885
30186665	1	21782.6	21311.9	36207.2	32966.3	23521.4	36352.6		14.4109	14.3794	15.144	15.0087	14.5217	15.1498		14.6447		-0.233864	-0.265376	0.49924	0.363955	-0.123065	0.505021
30186665	1	25001	24274.6	30186.9	34134.4	30441.9	41140.3		14.6097	14.5672	14.8816	15.0589	14.8938	15.3283		14.6862		-0.0764643	-0.119005	0.195469	0.372773	0.207607	0.6421
30186665	1	19379.1	28770.1	28833.2	34408.7	35067.7	38127.9		14.2422	14.8123	14.8154	15.0705	15.0979	15.2186		14.6233		-0.381103	0.188971	0.192132	0.447171	0.474542	0.595246
30186665	1	24096.7	26853.8	39909.1	41429.2	41438.1	45240.8		14.5565	14.7128	15.2844	15.3384	15.3387	15.4653		14.8513		-0.294725	-0.138433	0.433158	0.487087	0.487398	0.614063
30186665	1	29259.1	32328.4	66583.2	51924.3	37771.8	61031.6		14.8366	14.9805	16.0229	15.6641	15.205	15.8973		15.28		-0.443395	-0.29948	0.742875	0.384127	-0.0749753	0.617274
30186665	1	28538.5	38407.6	45257.8	47187.6	39514.4	59037.6		14.8006	15.2291	15.4659	15.5261	15.2701	15.8493		15.1652		-0.364581	0.0639025	0.300678	0.36092	0.104889	0.684147
30186665	1	26068.2	40138.2	49755.9	52378.3	43695.9	59041.8		14.67	15.2927	15.6026	15.6767	15.4152	15.8494		15.1884		-0.518419	0.104263	0.414155	0.488258	0.226788	0.661026
30186665	1	34976.5	47660.9	53388.1	65580.9	60501.2	70876.5		15.0941	15.5405	15.7042	16.001	15.8847	16.113		15.4463		-0.352184	0.0942362	0.257948	0.554705	0.438393	0.666736
30186665	1	21487.8	37405.2	80651.1	76698	57269.6	82280.5		14.3912	15.191	16.2994	16.2269	15.8055	16.3283		15.2939		-0.902631	-0.102912	1.00554	0.933038	0.511617	1.0344
30186665	1	23226.4	44849.3	88616.5	87838.3	78021.2	124470		14.5035	15.4528	16.4353	16.4226	16.2516	16.9254		15.4639		-0.960377	-0.0110561	0.971433	0.958708	0.787725	1.46158
30186665	1	54597.4	55142.1	77562.3	64967.6	76884.4	86896.1		15.7365	15.7509	16.2431	15.9874	16.2304	16.407		15.9102		-0.173614	-0.159293	0.332907	0.0772721	0.320244	0.496844
30186665	1	46396.2	52936.1	93425.7	100150	83086.5	105559		15.5017	15.692	16.5115	16.6118	16.3423	16.6877		15.9017		-0.40002	-0.209773	0.609793	0.710062	0.440589	0.785947
30186665	1	56853.6	86733.3	115354	115977	118657	142403		15.795	16.4043	16.8157	16.8235	16.8564	17.1196		16.3383		-0.543358	0.0659772	0.477381	0.485158	0.518117	0.781298
30186665	1	113501	146338	234353	204032	214356	262014		16.7923	17.1589	17.8383	17.6384	17.7096	17.9993		17.2632		-0.470856	-0.104264	0.57512	0.375229	0.446442	0.736081
30186665	1	142511	211082	327902	231764	203894	344894		17.1207	17.6874	18.3229	17.8223	17.6375	18.3958		17.7104		-0.589637	-0.0229133	0.612551	0.11194	-0.0728946	0.685438
30186665	1	138425	205609	260626	321654	268734	351670		17.0787	17.6495	17.9916	18.2952	18.0358	18.4239		17.5733		-0.494559	0.0762407	0.418318	0.721848	0.462514	0.850558
30186665	1	218548	211717	381839	342533	367377	414909		17.7376	17.6918	18.5426	18.3859	18.4869	18.6624		17.9907		-0.253067	-0.298881	0.551947	0.395225	0.496243	0.671778
30186665	1	220704	355442	499195	760025	516723	602521		17.7518	18.4393	18.9292	19.5357	18.979	19.2007		18.3734		-0.621664	0.0658362	0.555828	1.16227	0.605615	0.827235
30186665	1	369744	391479	599506	616664	528935	675853		18.4962	18.5786	19.1934	19.2341	19.0127	19.3664		18.7561		-0.259884	-0.177478	0.437363	0.478071	0.256679	0.610298
30186676	1	1615.2	2828.46	1956.85	2511.25	3646.7	3987.58		10.6575	11.4658	10.9343	11.2942	11.8324	11.9613		11.0192		-0.361708	0.446595	-0.0848869	0.274984	0.813168	0.94209
30186678	1	14991.4	11979.5	13764.8	36209.5	15237.6	18327.3		13.8718	13.5483	13.7487	15.1441	13.8953	14.1617		13.7229		0.148908	-0.174662	0.0257543	1.42114	0.172409	0.438772
30186680	1	30209.8	31492.9	42026.7	41581.8	39767.3	52641.1		14.8827	14.9427	15.359	15.3437	15.2793	15.6839		15.0615		-0.178767	-0.118756	0.297523	0.282171	0.2178	0.622406
30186692	1	13845.9	18969.6	22467.4	16742.2	23191.2	22238.5		13.7572	14.2114	14.4555	14.0312	14.5013	14.4408		14.1414		-0.384205	0.0700301	0.314175	-0.110167	0.359917	0.299401
30186692	1	29595.1	39216.6	38998.2	43143	41065.9	48377		14.8531	15.2592	15.2511	15.3968	15.3257	15.562		15.1211		-0.268053	0.138056	0.129997	0.275717	0.20453	0.440911
30186714	1	4633.14	4150.52	5893.04	5653.03	6323.05	7252.57		12.1778	12.0191	12.5248	12.4648	12.6264	12.8243		12.2405		-0.0627744	-0.221472	0.284247	0.22426	0.385855	0.583727
30186714	1	5057.08	6680.26	7803.51	7100.43	8064.03	8469.98		12.3041	12.7057	12.9299	12.7937	12.9773	13.0481		12.6466		-0.342473	0.0591267	0.283346	0.147129	0.330724	0.401581
30186714	1	6786.81	7833.19	10488.8	8203.66	9185.47	9791.85		12.7285	12.9354	13.3566	13.0021	13.1651	13.2574		13.0068		-0.278303	-0.0714372	0.349741	-0.00476987	0.158315	0.250544
30186714	1	16404.6	19313.4	23392.1	21001.9	26781.2	25357.1		14.0018	14.2373	14.5137	14.3582	14.7089	14.6301		14.251		-0.249143	-0.0136374	0.26278	0.107281	0.457977	0.37915
30186714	1	18204	23878.1	32992.9	29043.2	34050.7	26788.4		14.152	14.5434	15.0099	14.8259	15.0554	14.7093		14.5684		-0.416446	-0.0250123	0.441459	0.257502	0.486987	0.140912
30186714	1	40240.9	51111.5	63567.1	61793.8	63065.4	69143.3		15.2964	15.6414	15.956	15.9152	15.9446	16.0773		15.6312		-0.334866	0.0101164	0.32475	0.283931	0.313319	0.446058
30186734	1	791.461	2044.3	2807.95	1673.72	2096.52	2767.2		9.62837	10.9974	11.4553	10.7088	11.0338	11.4342		10.6937		-1.06531	0.303703	0.761611	0.015157	0.340091	0.740521
30186734	1	1687.5	889.962	1329.55	2770.57	2150.26	1750.62		10.7207	9.7976	10.3767	11.436	11.0703	10.7737		10.2983		0.42234	-0.500731	0.078391	1.13764	0.771962	0.475323
30186734	1	1527.01	3157.68	1896.42	2293.52	3036.77	3694.22		10.5765	11.6246	10.8891	11.1633	11.5683	11.8511		11.0301		-0.453576	0.594581	-0.141006	0.133281	0.538251	0.820985
30186734	1	1152.74	1153.09	1561.87	1492.51	1667.95	2330.69		10.1709	10.1713	10.6091	10.5435	10.7039	11.1865		10.3171		-0.146214	-0.145779	0.291993	0.226458	0.386792	0.869472
30186734	1	13830.4	12686.1	19754.7	14652.2	17824	17910.7		13.7556	13.631	14.2699	13.8388	14.1215	14.1285		13.8855		-0.129919	-0.254512	0.384432	-0.0466469	0.236058	0.24306
30186734	1	14950.3	14712	17479.3	13808.4	22267.6	17831.2		13.8679	13.8447	14.0934	13.7533	14.4427	14.1221		13.9353		-0.0674275	-0.090613	0.158041	-0.182062	0.507339	0.186797
30186734	1	18481.7	22175.3	26100.1	30287.8	30345.7	31525.1		14.1738	14.4367	14.6718	14.8865	14.8892	14.9442		14.4274		-0.253602	0.00924984	0.244353	0.459036	0.461788	0.516798
30186739	1	2973.82	5481.23	5336.41	5751.3	6348.8	6018.97		11.5381	12.4203	12.3817	12.4897	12.6323	12.5553		12.1133		-0.575246	0.306938	0.268307	0.376328	0.518923	0.441955
30186739	1	6415.32	8357.17	10010.7	8964.01	8264.75	9092		12.6473	13.0288	13.2893	13.1299	13.0128	13.1504		12.9885		-0.341147	0.0403458	0.300802	0.141475	0.0243022	0.161929
30186739	1	6933.06	11100.9	8980.11	8808.7	10613.7	10393.4		12.7593	13.4384	13.1325	13.1047	13.3736	13.3434		13.1101		-0.350784	0.328329	0.0224558	-0.0053481	0.263578	0.23332
30186739	1	6987.57	6359.26	8450.75	9938.4	11077.1	9738.84		12.7706	12.6346	13.0449	13.2788	13.4353	13.2495		12.8167		-0.0461187	-0.182051	0.22817	0.462104	0.618593	0.43284
30186739	1	8284.44	11366.9	12080.2	11081.5	12448.6	9542.54		13.0162	13.4725	13.5604	13.4359	13.6037	13.2202		13.3497		-0.33351	0.122848	0.210663	0.0861628	0.253995	-0.129542
30186739	1	11536.6	21911.3	19089.2	16396.6	19236.3	16064.6		13.4939	14.4194	14.2205	14.0011	14.2315	13.9716		14.0446		-0.550663	0.374792	0.175871	-0.0434862	0.186942	-0.0729977
30186746	1	3171.9	3156.5	4563.04	3571.64	5357.73	6177.01		11.6311	11.6241	12.1558	11.8024	12.3874	12.5927		11.8037		-0.172541	-0.179565	0.352107	-0.00130102	0.583732	0.78902
30186746	1	3473.75	4953.66	4788.04	5186.69	3131.02	6194.51		11.7623	12.2743	12.2252	12.3406	11.6124	12.5968		12.0873		-0.32498	0.18702	0.13796	0.253339	-0.47484	0.509517
30186746	1	5092.09	4483.34	6457.34	6982.64	5643.82	8616.74		12.314	12.1304	12.6567	12.7696	12.4625	13.0729		12.367		-0.052999	-0.236684	0.289683	0.402517	0.0954151	0.705886
30186746	1	10464.5	13679.5	15714.5	15836.3	13414.8	20707.2		13.3532	13.7397	13.9398	13.951	13.7115	14.3378		13.6776		-0.324373	0.0621464	0.262227	0.27337	0.0339605	0.660262
30186746	1	12527.7	13697	15817.6	20065.1	16892.2	18377.8		13.6128	13.7416	13.9492	14.2924	14.0441	14.1657		13.7679		-0.155045	-0.0263132	0.181358	0.524515	0.27619	0.397793
30186758	1	632.909	2107.49	1548.84	2899.57	1051.03	3229.69		9.30586	11.0413	10.597	11.5016	10.0376	11.6572		10.3147		-1.00886	0.726598	0.282261	1.18691	-0.277127	1.34247
30186758	1	5389.5	4279.82	5077.85	4949.88	4075.67	6586.26		12.3959	12.0633	12.31	12.2732	11.9928	12.6852		12.2564		0.139513	-0.193091	0.0535782	0.0167533	-0.263601	0.428819
30186758	1	6771.48	6504.13	9770.88	10620.9	7673.18	10392.7		12.7253	12.6671	13.2543	13.3746	12.9056	13.3433		12.8822		-0.156967	-0.215083	0.37205	0.492396	0.0233852	0.461059
30186758	1	5793.81	5978.06	8839.09	9036.48	8052.17	8787.28		12.5003	12.5455	13.1097	13.1415	12.9752	13.1012		12.7185		-0.218184	-0.173019	0.391203	0.423065	0.256682	0.382722
30186758	1	21996.8	30725.4	29565.6	42662	61516	13834.1		14.425	14.9071	14.8516	15.3807	15.9087	13.7559		14.7279		-0.302922	0.179217	0.123705	0.652736	1.18075	-0.971982
30186758	1	11246	13337.8	12295.4	17772.8	6935.45	21211		13.4571	13.7032	13.5858	14.1174	12.7598	14.3725		13.5821		-0.124937	0.121169	0.00376858	0.53532	-0.822291	0.790464
30186758	1	16492.1	18417.4	27890.2	23967.3	17290.1	25939.5		14.0095	14.1688	14.7675	14.5488	14.0777	14.6629		14.3152		-0.305762	-0.146463	0.452225	0.233531	-0.23759	0.347613
30186758	1	28076.6	31300.1	32518.4	33199.5	37567.6	39611.8		14.7771	14.9339	14.989	15.0189	15.1972	15.2736		14.9		-0.122896	0.0339018	0.088994	0.118899	0.297226	0.373667
30186773	1	2877.93	5080.4	5186.08	2822.11	5833.35	5625.83		11.4908	12.3107	12.3404	11.4626	12.5101	12.4579		12.0473		-0.55651	0.263403	0.293107	-0.584764	0.462786	0.410527
30186773	1	3285.19	5283.13	5936.66	6994.8	5685.76	6302.04		11.6818	12.3672	12.5354	12.7721	12.4731	12.6216		12.1948		-0.513031	0.172386	0.340645	0.577276	0.278346	0.426812
30186773	1	2939.98	5468.38	5597.84	6779.91	5661.1	5862.97		11.5216	12.4169	12.4507	12.7271	12.4669	12.5174		12.1297		-0.608123	0.287184	0.320939	0.597337	0.337152	0.387702
30186773	1	10336.9	39946.4	23987.2	49594	62789	16294.3		13.3355	15.2858	14.55	15.5979	15.9382	13.9921		14.3904		-1.05491	0.895354	0.159551	1.20746	1.5478	-0.398342
30186773	1	19194.8	16517.9	22629.7	23115.6	18876.2	18707		14.2284	14.0117	14.4659	14.4966	14.2043	14.1913		14.2354		-0.00693864	-0.223627	0.230566	0.261211	-0.0310883	-0.0440778
30186773	1	15907.2	28733.3	35562.1	40362.9	32357.1	41148.9		13.9574	14.8104	15.1181	15.3007	14.9818	15.3286		14.6286		-0.671232	0.181806	0.489426	0.672114	0.353168	0.699937
30186795	1	11827.6	13736.3	20076.6	12162.3	12895.3	17891.9		13.5299	13.7457	14.2932	13.5701	13.6546	14.127		13.8563		-0.326394	-0.110565	0.436959	-0.286138	-0.201704	0.270753
30186795	1	12109.7	18746.9	22615.1	18948.1	18399.1	23658.5		13.5639	14.1944	14.465	14.2098	14.1674	14.5301		14.0744		-0.510534	0.119952	0.390583	0.135353	0.0929348	0.455654
30186795	1	18224.7	28520.1	46242.1	25723.3	30545.1	40337.1		14.1536	14.7997	15.4969	14.6508	14.8987	15.2998		14.8167		-0.663131	-0.0170485	0.68018	-0.165947	0.0819133	0.483081
30186795	1	61983.8	80103.6	89084.8	55957.5	87777.4	111143		15.9196	16.2896	16.4429	15.772	16.4216	16.7621		16.2174		-0.297754	0.0722212	0.225533	-0.445315	0.204204	0.544701
30186826	1	3342.9	4613.3	6385.21	3905.96	5302.44	3573.53		11.7069	12.1716	12.6405	11.9315	12.3724	11.8031		12.173		-0.466112	-0.0014114	0.467523	-0.241532	0.199445	-0.369861
30186861	1	4423.63	3653.63	5876.18	3801.69	5606.2	6230.68		12.111	11.8351	12.5207	11.8924	12.4528	12.6052		12.1556		-0.0445818	-0.320483	0.365065	-0.263172	0.29721	0.449577
30186861	1	4924.47	3630.04	4702.44	6369.56	6079.03	5978.49		12.2658	11.8258	12.1992	12.637	12.5696	12.5456		12.0969		0.168847	-0.271135	0.102288	0.540073	0.47272	0.448659
30186861	1	9654.57	10012.2	14369	12805.5	12313.1	11303.4		13.237	13.2895	13.8107	13.6445	13.5879	13.4645		13.4457		-0.208718	-0.156241	0.364959	0.198762	0.142195	0.0187564
30186861	1	16959.4	16887.2	20805.2	24821	23231	29627.4		14.0498	14.0436	14.3447	14.5993	14.5038	14.8546		14.146		-0.0962338	-0.102393	0.198627	0.453244	0.357733	0.708613
30186866	1	21469.6	7475.24	15334.6	12632.3	15019.7	15590.2		14.39	12.8679	13.9045	13.6248	13.8746	13.9283		13.7208		0.669203	-0.852902	0.183699	-0.0959822	0.153761	0.207541
30186866	1	27397.7	15171.8	20674.6	16479.4	25233.2	23122.5		14.7418	13.8891	14.3356	14.0084	14.623	14.497		14.3221		0.419618	-0.433042	0.0134241	-0.313769	0.300886	0.174861
30186868	1	12672.2	12939.5	13709.3	15334.5	17630.6	16185.6		13.6294	13.6595	13.7429	13.9045	14.1058	13.9824		13.6772		-0.0478695	-0.0177515	0.065621	0.227242	0.428548	0.30518
30186872	1	2772.45	3844.86	7694.41	5436.12	6804.17	4362.77		11.4369	11.9087	12.9096	12.4084	12.7322	12.091		12.0851		-0.648139	-0.17637	0.82451	0.323277	0.647118	0.00594417
30186872	1	5819.75	4637.08	12296.5	7115.47	14449.7	7229.34		12.5067	12.179	13.586	12.7967	13.8188	12.8196		12.7572		-0.250493	-0.578233	0.828725	0.0395109	1.06152	0.0624141
30186872	1	10264.5	7266.99	13549.6	14635.2	14704.6	13232		13.3254	12.8271	13.726	13.8372	13.844	13.6917		13.2928		0.03255	-0.465685	0.433135	0.54433	0.551156	0.398912
30186872	1	7142.46	7064.01	9315.32	7094.48	10706.4	10861.7		12.8022	12.7863	13.1854	12.7925	13.3862	13.407		12.9246		-0.122418	-0.13835	0.260767	-0.132141	0.46156	0.482346
30186872	1	7693.19	6307.85	9064.87	7317.2	19471.2	8392.79		12.9094	12.6229	13.1461	12.8371	14.2491	13.0349		12.8928		0.0165763	-0.269858	0.253281	-0.0557141	1.35627	0.142145
30186872	1	15107.6	12264	30214.7	27648.2	29430.1	18400.5		13.883	13.5821	14.883	14.7549	14.845	14.1675		14.116		-0.233043	-0.533892	0.766935	0.638866	0.728973	0.0514275
30186872	1	17998.8	16297.1	18848	19928.9	33339.7	20836		14.1356	13.9923	14.2021	14.2826	15.025	14.3468		14.11		0.0255924	-0.117694	0.0921021	0.172556	0.914931	0.236766
30186872	1	154720	147962	263754	209616	318519	169036		17.2393	17.1749	18.0088	17.6774	18.281	17.367		17.4743		-0.23503	-0.29947	0.5345	0.203055	0.806687	-0.10736
30186898	1	4942.54	7830.11	8145.13	10531	9154.49	17590.8		12.271	12.9348	12.9917	13.3624	13.1603	14.1025		12.7325		-0.461488	0.202292	0.259197	0.629835	0.427739	1.37001
30186898	1	4681.87	8679.77	10932.9	12206.5	7537.13	19831.4		12.1929	13.0834	13.4164	13.5754	12.8798	14.2755		12.8976		-0.704698	0.185873	0.518825	0.677799	-0.0177696	1.37793
30186898	1	9132.96	26547.2	26003.8	30384	15209	66649.4		13.1569	14.6963	14.6664	14.891	13.8926	16.0243		14.1732		-1.01632	0.52308	0.493244	0.717832	-0.280555	1.85111
30186898	1	28516.3	56027.8	46550.7	62237	41157.7	111346		14.7995	15.7739	15.5065	15.9255	15.3289	16.7647		15.36		-0.560457	0.413898	0.146559	0.565528	-0.0310825	1.40474
30186910	1	14110.4	15431.6	17163.5	23500.8	24599.1	22440.4		13.7845	13.9136	14.0671	14.5204	14.5863	14.4538		13.9217		-0.137242	-0.00810563	0.145348	0.598713	0.664607	0.532098
30186910	1	27085.6	32814.4	37605.5	35325.5	39152.7	38569.8		14.7252	15.002	15.1987	15.1084	15.2568	15.2352		14.9753		-0.250073	0.0267297	0.223343	0.133107	0.281511	0.259872
30186910	1	26289.9	38586.3	37739.9	41621.8	50497.2	47750.5		14.6822	15.2358	15.2038	15.3451	15.6239	15.5432		15.0406		-0.358389	0.195193	0.163196	0.304443	0.583309	0.502621
30186971	1	9766.24	5430.06	7737.73	7183.66	11473.8	8472.81		13.2536	12.4068	12.9177	12.8105	13.4861	13.0486		12.8593		0.394242	-0.452592	0.0583496	-0.0488426	0.626717	0.18928
30186971	1	11952.7	6811.5	13828.9	10063.4	20244.9	10709.5		13.5451	12.7338	13.7554	13.2968	14.3053	13.3866		13.3447		0.200315	-0.610982	0.410667	-0.0479046	0.960537	0.0418728
30186971	1	11584.4	8804.1	14012.4	14720.1	17031.5	12017.2		13.4999	13.104	13.7744	13.8455	14.0559	13.5528		13.4594		0.0404751	-0.355466	0.314991	0.386077	0.596492	0.093391
30186971	1	24742.8	20089.9	37556.9	23555.6	34208.4	26381.6		14.5947	14.2942	15.1968	14.5238	15.0621	14.6872		14.6952		-0.10051	-0.401048	0.501558	-0.171449	0.366833	-0.00798964
30186971	1	30002.4	25419.9	38399.6	34747	38239.8	28515.5		14.8728	14.6337	15.2288	15.0846	15.2228	14.7995		14.9118		-0.0389638	-0.278084	0.317048	0.172844	0.311033	-0.112296
30186971	1	74726.6	49752.3	52263.7	46892.8	90933.7	40623.2		16.1893	15.6025	15.6735	15.5171	16.4725	15.31		15.8218		0.367557	-0.219301	-0.148256	-0.304699	0.650751	-0.511762
30186971	1	55834.7	48653.9	68786.8	49131.3	83914.9	47848.4		15.7689	15.5703	16.0698	15.5844	16.3566	15.5462		15.803		-0.0341209	-0.232729	0.26685	-0.218639	0.553645	-0.256814
30186975	1	20282.5	6162.69	8492.25	2586.43	20255.1	7773.36		14.308	12.5893	13.0519	11.3367	14.306	12.9243		13.3164		0.991542	-0.727064	-0.264478	-1.97966	0.98959	-0.392087
30186975	1	29100.7	5202.64	15863.4	4783.47	25340.6	7263.69		14.8288	12.345	13.9534	12.2238	14.6292	12.8265		13.7091		1.11969	-1.36404	0.244348	-1.48523	0.920091	-0.882582
30186975	1	19805	16902	23445.4	18503.4	26590	24123.7		14.2736	14.0449	14.517	14.1755	14.6986	14.5582		14.2785		-0.00492335	-0.233595	0.238518	-0.102998	0.420095	0.279664
30186975	1	71389.2	9383.31	26873.8	5368.87	59436.5	14261.6		16.1234	13.1959	14.7139	12.3904	15.8591	13.7998		14.6777		1.44568	-1.48186	0.0361733	-2.28734	1.18132	-0.877893
30186975	1	90665.3	9337.61	33644.7	10567.9	87548.8	17003.1		16.4683	13.1888	15.0381	13.3674	16.4178	14.0535		14.8984		1.56987	-1.70956	0.139695	-1.53099	1.5194	-0.84489
30186975	1	93454.6	11527.7	32902.6	11457.1	85544.3	19796.7		16.512	13.4928	15.0059	13.484	16.3844	14.273		15.0036		1.50841	-1.51075	0.00234391	-1.51962	1.38081	-0.7306
30186975	1	104256	7689.33	41011.4	12422	96135.2	28702.3		16.6698	12.9086	15.3237	13.6006	16.5528	14.8089		14.9674		1.70238	-2.05874	0.356357	-1.36678	1.5854	-0.158505
30186975	1	143864	17232.2	62634.9	10723.8	153026	23070.8		17.1343	14.0728	15.9347	13.3885	17.2234	14.4938		15.7139		1.4204	-1.64113	0.220731	-2.32542	1.50947	-1.22017
30186990	1	2159.39	3241.87	2015.83	3788.96	3250.11	3872.45		11.0764	11.6626	10.9772	11.8876	11.6663	11.919		11.2387		-0.162317	0.423885	-0.261567	0.648863	0.42755	0.680307
30186990	1	4863.44	5097.16	5442.52	6285.72	8984.32	7232.06		12.2478	12.3155	12.4101	12.6179	13.1332	12.8202		12.3244		-0.0766707	-0.00895513	0.0856258	0.293431	0.80876	0.495758
30186990	1	9879.73	12814.6	10913	14568.7	14343.4	13519.5		13.2703	13.6455	13.4138	13.8306	13.8081	13.7228		13.4432		-0.172918	0.202326	-0.0294077	0.387408	0.364928	0.279581
30186990	1	22761.8	27251.7	31712.8	28302.1	33086.8	36199.9		14.4743	14.7341	14.9528	14.7886	15.014	15.1437		14.7204		-0.246063	0.0136727	0.232391	0.068235	0.29358	0.42331
30186990	1	22226.1	25492.3	34479.2	34862.7	32165.7	35331.5		14.44	14.6378	15.0734	15.0894	14.9732	15.1087		14.7171		-0.277093	-0.0792869	0.35638	0.372336	0.256175	0.391606
30186997	1	4612.93	4534.23	7082.9	7409.29	7038.95	6049.3		12.1715	12.1466	12.7901	12.8551	12.7811	12.5626		12.3694		-0.197943	-0.22277	0.420713	0.485708	0.411732	0.19314
30186997	1	20853.5	34353.8	24332.3	47146.1	78304.2	14726.7		14.348	15.0682	14.5706	15.5249	16.2568	13.8461		14.6623		-0.314251	0.405925	-0.0916737	0.862594	1.59455	-0.816113
30186997	1	13263.9	19263.9	22998	37018.1	35711.7	27862.2		13.6952	14.2336	14.4892	15.1759	15.1241	14.766		14.1394		-0.444131	0.0942613	0.34987	1.03659	0.984758	0.626667
30187071	1	53127.7	41176.7	44106.5	41454.5	38120.4	45890.2		15.6972	15.3295	15.4287	15.3392	15.2183	15.4859		15.4851		0.212037	-0.1556	-0.0564366	-0.145899	-0.266864	0.000759018
30187088	1	9830.78	9072.81	13568.2	8261.14	12976.9	12618		13.2631	13.1473	13.7279	13.0121	13.6637	13.6232		13.3795		-0.116367	-0.232123	0.34849	-0.367331	0.284203	0.243739
30187088	1	11229	12418	20324.1	13283.4	15602.9	16580.5		13.4549	13.6001	14.3109	13.6973	13.9295	14.0172		13.7887		-0.33372	-0.188521	0.522241	-0.0913272	0.140858	0.228535
30187088	1	15893.1	15808.7	19517.4	16130.9	19605.4	19634.3		13.9561	13.9484	14.2525	13.9775	14.259	14.2611		14.0523		-0.0962253	-0.103912	0.200137	-0.0747985	0.206621	0.20875
30187088	1	14258.5	18004.3	16364.9	18390.3	15007.3	16561.5		13.7995	14.1361	13.9983	14.1667	13.8734	14.0155		13.978		-0.178433	0.158085	0.0203482	0.188686	-0.104597	0.0375794
30187088	1	16048.9	14281.5	21497.6	13917.4	19831.5	16095.5		13.9702	13.8019	14.3919	13.7646	14.2755	13.9744		14.0546		-0.0844586	-0.252785	0.337244	-0.290037	0.22086	-0.0802783
30187088	1	20482.9	24416.2	29619.4	25226.2	27816.2	29140.5		14.3221	14.5756	14.8543	14.6226	14.7636	14.8307		14.584		-0.261846	-0.00842817	0.270275	0.038654	0.179656	0.24676
30187088	1	17939.1	27262.4	30631.9	32086.9	32188.2	37727.8		14.1308	14.7346	14.9027	14.9697	14.9742	15.2033		14.5894		-0.458578	0.145228	0.31335	0.380299	0.384845	0.613941
30187088	1	24848.7	35502	35811.2	27281.8	33537.2	36272		14.6009	15.1156	15.1281	14.7357	15.0335	15.1466		14.9482		-0.347324	0.167407	0.179917	-0.212551	0.0852721	0.198364
30187088	1	30051.3	28901.3	39279.3	39189.3	36192.7	39969.9		14.8751	14.8188	15.2615	15.2582	15.1434	15.2866		14.9852		-0.110017	-0.16631	0.276327	0.273015	0.158257	0.30147
30187088	1	33443.7	47413.7	49026.9	39563.7	51949.6	33092.7		15.0294	15.533	15.5813	15.2719	15.6648	15.0142		15.3813		-0.351803	0.151766	0.200037	-0.10936	0.283574	-0.367025
30187088	1	28204.8	54352.1	58906.8	37602.8	47615.3	49089.3		14.7837	15.73	15.8461	15.1986	15.5391	15.5831		15.4533		-0.669629	0.276765	0.392864	-0.25473	0.0858564	0.12984
30187088	1	49753.6	79828.1	97679.8	75029	86724.6	75340.2		15.6025	16.2846	16.5758	16.1952	16.4042	16.2011		16.1543		-0.551784	0.13031	0.421474	0.0408622	0.249855	0.0468335
30187088	1	115008	124566	137646	134290	128654	143621		16.8114	16.9265	17.0706	17.035	16.9731	17.1319		16.9362		-0.124803	-0.00962821	0.134431	0.0988132	0.036959	0.195731
30187167	1	3301.99	5653.17	5221.96	5134.92	9095.76	7312.84		11.6891	12.4648	12.3504	12.3261	13.151	12.8362		12.1681		-0.478993	0.296731	0.182262	0.158012	0.982864	0.668102
30187167	1	5503.43	12516.3	11507.3	13233.4	14075.5	16250.7		12.4261	13.6115	13.4903	13.6919	13.7809	13.9882		13.176		-0.749854	0.435555	0.314299	0.515931	0.604927	0.812245
30187167	1	9829.72	19683.1	18163.7	15021.2	24097.7	16009.8		13.2629	14.2647	14.1488	13.8747	14.5566	13.9667		13.8921		-0.629191	0.372545	0.256646	-0.0174109	0.664479	0.0745456
30187167	1	7430.07	18539.7	26335.2	19613.1	27157.5	20835.4		12.8592	14.1783	14.6847	14.2595	14.7291	14.3467		13.9074		-1.04824	0.27093	0.777308	0.35213	0.821665	0.439349
30187167	1	13407.7	25748.1	24105.6	18767	37410.6	23053.9		13.7108	14.6522	14.5571	14.1959	15.1912	14.4927		14.3067		-0.595902	0.345499	0.250404	-0.110769	0.884481	0.186047
30187167	1	33720.9	107682	152314	107969	165628	124077		15.0414	16.7164	17.2167	16.7203	17.3376	16.9209		16.3248		-1.28346	0.391596	0.891868	0.395435	1.01277	0.596054
30187167	1	30602.3	160641	190722	110903	217773	166034		14.9014	17.2935	17.5411	16.7589	17.7325	17.3411		16.5786		-1.6773	0.714832	0.962466	0.180291	1.15382	0.76247
30187176	1	1736.95	4515.43	1459.38	4235.73	3819.23	5206.53		10.7623	12.1406	10.5111	12.0484	11.8991	12.3461		11.138		-0.375703	1.0026	-0.626901	0.910351	0.761025	1.20806
30187176	1	3517.74	4978.96	5822.91	5140.81	7348.98	5238.08		11.7804	12.2816	12.5075	12.3278	12.8433	12.3548		12.1899		-0.409431	0.0917679	0.317663	0.137918	0.653467	0.16496
30187176	1	3803.23	5043.45	6050.76	7227.24	6147.82	7488.11		11.893	12.3002	12.5629	12.8192	12.5859	12.8704		12.252		-0.359027	0.0481607	0.310866	0.567194	0.333824	0.618351
30187176	1	3264.52	2526.65	3393.55	3667.1	3951.11	3737.55		11.6727	11.303	11.7286	11.8404	11.948	11.8679		11.5681		0.104573	-0.265071	0.160498	0.272342	0.379964	0.299798
30187176	1	5764.12	5757.33	6070.94	6332.83	5147.91	5439.81		12.4929	12.4912	12.5677	12.6286	12.3298	12.4093		12.5173		-0.0243735	-0.0260732	0.0504466	0.111377	-0.187487	-0.107917
30187176	1	3898.43	6326.42	9483.79	8880.72	9500.23	10897.6		11.9287	12.6272	13.2112	13.1165	13.2137	13.4117		12.589		-0.660356	0.0381404	0.622216	0.527429	0.624713	0.822695
30187176	1	2229.88	4939.35	3774.09	4673.31	5293.71	5895.45		11.1228	12.2701	11.8819	12.1902	12.3701	12.5254		11.7583		-0.635505	0.511849	0.123656	0.431972	0.611805	0.767127
30187176	1	4094.04	7912.84	6732.22	10938.7	8570.23	7458.59		11.9993	12.95	12.7169	13.4171	13.0651	12.8647		12.5554		-0.556077	0.394595	0.161482	0.861763	0.509733	0.309302
30187176	1	1936.36	5076.3	4652.38	7840.36	6965.32	6454.99		10.9191	12.3096	12.1838	12.9367	12.766	12.6562		11.8041		-0.88502	0.505414	0.379606	1.13256	0.961826	0.852051
30187176	1	4099.96	7885.75	6560.15	12525.4	9210.69	13553.7		12.0014	12.945	12.6795	13.6126	13.1691	13.7264		12.542		-0.540585	0.403052	0.137533	1.07059	0.627113	1.18442
30187176	1	7091.55	10455.7	8028.95	9077.34	11417.7	12920.9		12.7919	13.352	12.971	13.1481	13.479	13.6574		13.0383		-0.246409	0.313707	-0.067298	0.109759	0.440686	0.619124
30187176	1	2414	6896.91	7537.96	17141.1	12003	11130.2		11.2372	12.7517	12.88	14.0652	13.5511	13.4422		12.2896		-1.05242	0.4621	0.590324	1.77554	1.26148	1.15256
30187176	1	14697.3	15101.4	16776.2	26429.6	19844.3	33222.7		13.8433	13.8824	14.0341	14.6899	14.2764	15.0199		13.9199		-0.0766666	-0.0375343	0.114201	0.769942	0.356511	1.09996
30187176	1	17412.3	26613.4	26273.9	23020.2	28346.6	24934.4		14.0878	14.6999	14.6813	14.4906	14.7909	14.6058		14.4897		-0.401859	0.210191	0.191668	0.000934871	0.301213	0.116172
30187176	1	17101.2	19558.9	16836.4	23403.3	23351.7	28206.3		14.0618	14.2555	14.0393	14.5144	14.5112	14.7837		14.1189		-0.057073	0.136659	-0.0795864	0.395545	0.39236	0.664852
30187176	1	40219.7	30400	41485.2	37781.2	41132.1	37568.8		15.2956	14.8918	15.3403	15.2054	15.328	15.1972		15.1759		0.119713	-0.28412	0.164407	0.0294792	0.152075	0.0213462
30187176	1	22869.2	25068.3	27962.4	25873.9	30823.2	27761.5		14.4811	14.6136	14.7712	14.6592	14.9117	14.7608		14.622		-0.140846	-0.00838986	0.149236	0.0372412	0.289762	0.138832
30187176	1	21732.6	37945.6	35273.3	42222.2	39832	35093.6		14.4076	15.2116	15.1063	15.3657	15.2816	15.0989		14.9085		-0.500927	0.303141	0.197786	0.457212	0.373136	0.190419
30187176	1	22515.1	31028.9	31918.9	39450.3	34774.2	45655.6		14.4586	14.9213	14.9621	15.2677	15.0857	15.4785		14.7807		-0.322077	0.140639	0.181438	0.487062	0.305043	0.697821
30187176	1	25048.9	84923.9	43422.2	115472	141251	41308.7		14.6125	16.3739	15.4061	16.8172	17.1079	15.3342		15.4642		-0.851705	0.909722	-0.0580168	1.35302	1.64374	-0.130003
30187176	1	40774.6	67328.9	45310.3	64030.3	73361.3	50190		15.3154	16.0389	15.4675	15.9665	16.1627	15.6151		15.6073		-0.291908	0.431648	-0.13974	0.359178	0.555442	0.00782303
30187176	1	26617	45422	55294.2	64130.7	56186.2	65062.2		14.7001	15.4711	15.7548	15.9687	15.7779	15.9895		15.3087		-0.608608	0.162435	0.446173	0.66006	0.469262	0.680863
30187176	1	349122	714667	685854	966407	858820	968997		18.4134	19.4469	19.3875	19.8823	19.712	19.8861		19.0826		-0.669237	0.364303	0.304934	0.799663	0.629388	0.803525
30187213	1	38458.4	43024.7	51701.8	49652.9	57726.9	59581.4		15.231	15.3929	15.6579	15.5996	15.817	15.8626		15.4273		-0.19626	-0.0343939	0.230654	0.172318	0.389685	0.435303
30187253	1	21024.3	35005.5	35606.4	32942.6	39003.5	37218.6		14.3598	15.0953	15.1198	15.0077	15.2513	15.1837		14.8583		-0.498534	0.236989	0.261545	0.149364	0.393012	0.325433
30187271	1	10782.9	7413.2	10690.7	9906.51	7134.16	9214.65		13.3965	12.8559	13.3841	13.2742	12.8005	13.1697		13.2121		0.184328	-0.356255	0.171927	0.0620249	-0.411608	-0.0424215
30187271	1	20156.6	19582.9	25537.3	19195.1	22439.4	26008.8		14.299	14.2573	14.6403	14.2285	14.4537	14.6667		14.3989		-0.0998982	-0.141557	0.241455	-0.170413	0.0548811	0.267847
30187271	1	43028.7	51195.9	55052.7	40621	52448.3	44985.3		15.393	15.6437	15.7485	15.3099	15.6786	15.4572		15.5951		-0.202081	0.0486482	0.153433	-0.285154	0.0835165	-0.137927
30187283	1	1263.19	1599.16	1672.4	1899.15	2646.59	2459.21		10.3029	10.6431	10.7077	10.8911	11.3699	11.264		10.5512		-0.248361	0.0918755	0.156486	0.339917	0.818694	0.712756
30187283	1	8588.08	6796.34	8909.04	14799.7	10365.2	13095.9		13.0681	12.7305	13.1211	13.8533	13.3395	13.6768		12.9732		0.0948807	-0.242696	0.147815	0.880044	0.366222	0.703594
30187335	1	8216.96	6082.05	9588.44	7584.96	10514.4	9796.63		13.0044	12.5703	13.2271	12.8889	13.3601	13.2581		12.9339		0.0704522	-0.363596	0.293143	-0.0450097	0.426148	0.324133
30187335	1	5887.42	6490.41	10446.7	9803.22	7342.91	11949.7		12.5234	12.6641	13.3508	13.259	12.8421	13.5447		12.8461		-0.32267	-0.181995	0.504665	0.412951	-0.0039534	0.698601
30187335	1	7490.13	8080.34	10946.6	9361.49	9358.14	12538.4		12.8708	12.9802	13.4182	13.1925	13.192	13.6141		13.0897		-0.218946	-0.109522	0.328468	0.102801	0.102284	0.524345
30187335	1	9477.78	9593.74	13990.8	10879.8	14515.7	16421.4		13.2103	13.2279	13.7722	13.4094	13.8253	14.0033		13.4035		-0.193134	-0.17559	0.368724	0.00589947	0.421861	0.599822
30187335	1	8927.41	13085.9	18673.7	13488.6	14700.3	18398.4		13.124	13.6757	14.1887	13.7195	13.8436	14.1673		13.6628		-0.538796	0.0128977	0.525898	0.0566299	0.180735	0.504472
30187335	1	9351.55	15192.7	24940	19954.7	18852.5	27232.3		13.191	13.8911	14.6062	14.2844	14.2025	14.733		13.8961		-0.705095	-0.00499483	0.71009	0.388354	0.306387	0.836947
30187335	1	34937.8	31244	41415	31980.8	35813.6	43681.4		15.0925	14.9313	15.3379	14.9649	15.1282	15.4147		15.1206		-0.0280522	-0.189262	0.217315	-0.155632	0.00766719	0.294181
30187335	1	18451	23055.3	45727.8	40088.9	30638.3	50000.2		14.1714	14.4928	15.4808	15.2909	14.903	15.6096		14.715		-0.543592	-0.222192	0.765784	0.575913	0.188046	0.894645
30187335	1	41879.7	49304.9	60747.4	47859	74253.7	61595.1		15.354	15.5894	15.8905	15.5465	16.1802	15.9105		15.6113		-0.257351	-0.0218703	0.279221	-0.0648111	0.56886	0.299214
30187346	1	6618.28	10978.3	9732.93	12448.2	8959.02	11170.4		12.6922	13.4224	13.2487	13.6037	13.1291	13.4474		13.1211		-0.428848	0.301278	0.12757	0.482565	0.008037	0.326303
30187346	1	11923.2	7345.42	7079.05	8117.39	11021.8	10589.1		13.5415	12.8426	12.7893	12.9868	13.4281	13.3703		13.0578		0.483669	-0.21519	-0.268479	-0.071019	0.370247	0.312478
30187346	1	7647.26	7333.71	11521.6	13472.3	13158.1	11625		12.9007	12.8403	13.492	13.7177	13.6837	13.5049		13.0777		-0.176974	-0.237374	0.414348	0.640008	0.605958	0.427239
30187346	1	22045.8	24549.4	28545.3	35808.4	31014.5	35001.4		14.4282	14.5834	14.801	15.128	14.9207	15.0951		14.6042		-0.175976	-0.0207966	0.196773	0.523815	0.316459	0.490933
30187346	1	21452.2	20340.5	22163.3	26249.9	28904.7	27090.3		14.3888	14.3121	14.4359	14.68	14.819	14.7255		14.3789		0.0099089	-0.066866	0.056957	0.301094	0.440088	0.346557
30187351	1	4187.27	10921	9474.21	15993.8	25500.5	2982.46		12.0318	13.4148	13.2098	13.9652	14.6382	11.5423		12.8855		-0.853674	0.529351	0.324322	1.07976	1.75277	-1.34318
30187351	1	5220.9	3969.87	8262.46	6553.81	7413.64	8103.22		12.3501	11.9549	13.0124	12.6781	12.856	12.9843		12.4391		-0.0890219	-0.484229	0.573251	0.239011	0.416861	0.545174
30187351	1	13741.1	15604.3	22653.8	23323.3	18216.2	25242.3		13.7462	13.9297	14.4675	14.5095	14.1529	14.6236		14.0478		-0.301567	-0.118122	0.419689	0.461708	0.105161	0.575782
30187351	1	13346.1	17084.7	25155.1	24711.3	22071.5	26826.1		13.7041	14.0604	14.6186	14.5929	14.4299	14.7113		14.1277		-0.423569	-0.0672891	0.490858	0.465178	0.302195	0.583643
30187351	1	20482.7	25184.7	27464.2	33688.6	32075.6	28222.3		14.3221	14.6203	14.7453	15.04	14.9692	14.7845		14.5625		-0.240427	0.0577104	0.182717	0.477424	0.406642	0.221997
30187351	1	34646.1	44014.2	56615.9	50758.5	51272.3	56956.5		15.0804	15.4257	15.7889	15.6314	15.6459	15.7976		15.4317		-0.351263	-0.00598773	0.357251	0.199692	0.214223	0.365902
30187351	1	36795.1	47128	85652.5	87036.5	60839.1	83320.5		15.1672	15.5243	16.3862	16.4093	15.8927	16.3464		15.6926		-0.525351	-0.16828	0.693632	0.716756	0.200135	0.653806
30187351	1	88129.5	94663.4	147309	143972	127165	168756		16.4273	16.5305	17.1685	17.1354	16.9563	17.3646		16.7088		-0.281443	-0.178262	0.459706	0.426653	0.247558	0.655801
30187356	1	45234.6	43632.8	63512.6	52537.6	49539.3	48960.3		15.4651	15.4131	15.9548	15.6811	15.5963	15.5793		15.611		-0.145868	-0.197881	0.343749	0.0700556	-0.0147211	-0.0316816
30187368	1	21691.1	8126.67	12479.9	13417.9	27096.9	11489.4		14.4048	12.9884	13.6073	13.7119	14.7258	13.488		13.6669		0.737956	-0.678413	-0.0595436	0.0450061	1.05898	-0.17884
30187385	1	5913.25	5703.33	6563.17	7502.18	9318.8	12852.9		12.5297	12.4776	12.6802	12.8731	13.1859	13.6498		12.5625		-0.0327653	-0.084912	0.117677	0.310595	0.623429	1.08731
30187385	1	6776.49	7573.27	9232.66	10660.9	9392.02	10583.5		12.7263	12.8867	13.1725	13.38	13.1972	13.3695		12.9285		-0.202195	-0.041817	0.244012	0.451518	0.268702	0.441008
30187385	1	8086.75	10485.2	16276.5	12803.3	12340.7	16789.9		12.9813	13.3561	13.9905	13.6442	13.5911	14.0353		13.4426		-0.461295	-0.0865717	0.547867	0.201588	0.148499	0.592672
30187385	1	11940.5	16745.4	24559.2	27279.2	21877.8	29959.7		13.5436	14.0315	14.584	14.7355	14.4172	14.8707		14.053		-0.509428	-0.0215355	0.530964	0.682502	0.364169	0.817727
30187385	1	17087.8	14336.3	24720.3	24367.3	23268.6	29647.6		14.0607	13.8074	14.5934	14.5727	14.5061	14.8556		14.1538		-0.0931486	-0.346434	0.439583	0.418834	0.352275	0.701806
30187385	1	10428.8	20127.4	22651.3	25544.4	24189.6	31904.7		13.3483	14.2969	14.4673	14.6407	14.5621	14.9615		14.0375		-0.689203	0.259385	0.429818	0.603232	0.524615	0.923996
30187385	1	20165	19574.7	22807.3	23557.9	24591.9	27009.6		14.2996	14.2567	14.4772	14.5239	14.5859	14.7212		14.3445		-0.0449289	-0.0877865	0.132715	0.179429	0.241406	0.376694
30187385	1	27717.3	34195.6	37191.3	40078	43468.2	51537.4		14.7585	15.0615	15.1827	15.2905	15.4077	15.6533		15.0009		-0.242399	0.0606216	0.181777	0.289624	0.406774	0.652433
30187385	1	55383.4	58410.8	73585.2	70090.7	74660.1	85168.9		15.7572	15.8339	16.1671	16.0969	16.188	16.378		15.9194		-0.162248	-0.0854659	0.247714	0.177521	0.268636	0.458626
30187385	1	113692	98210.9	140818	142330	164156	164640		16.7948	16.5836	17.1035	17.1189	17.3247	17.329		16.8273		-0.0325113	-0.243683	0.276194	0.291604	0.497426	0.501675
30187385	1	113527	139451	169625	171173	172055	218919		16.7927	17.0894	17.372	17.3851	17.3925	17.74		17.0847		-0.292009	0.0047081	0.287301	0.300404	0.307818	0.655352
30187401	1	4856.26	3639.69	7303.28	7671.41	6284.4	8023.55		12.2456	11.8296	12.8343	12.9053	12.6176	12.97		12.3032		-0.0575558	-0.473588	0.531143	0.60209	0.314373	0.666839
30187401	1	10911.6	10654.8	15306.7	12260.2	15253.6	14340.4		13.4136	13.3792	13.9019	13.5817	13.8969	13.8078		13.5649		-0.151311	-0.185674	0.336984	0.0168088	0.331975	0.242911
30187404	1	6593.94	11158.2	12550.1	10145.9	11579.4	11231.2		12.6869	13.4458	13.6154	13.3086	13.4993	13.4552		13.2494		-0.56246	0.196438	0.366022	0.0592249	0.249887	0.205842
30187404	1	18921.5	18067.8	26172.8	23049.2	25831.8	28191.8		14.2077	14.1411	14.6758	14.4924	14.6569	14.783		14.3416		-0.133809	-0.20042	0.334229	0.15088	0.315311	0.441438
30187408	1	6269.35	4244.8	9011.19	12783.4	9508.36	13104		12.6141	12.0515	13.1375	13.642	13.215	13.6777		12.601		0.013072	-0.549546	0.536474	1.04096	0.613953	1.07669
30187408	1	43680.5	33859.6	66825.3	110176	89105.7	79272.2		15.4147	15.0473	16.0281	16.7495	16.4432	16.2745		15.4967		-0.0819945	-0.449417	0.531411	1.25275	0.946535	0.777831
30187457	1	1431.29	1605.43	2203.82	1797.8	2704.55	2191.28		10.4831	10.6487	11.1058	10.812	11.4012	11.0976		10.7459		-0.262777	-0.0971354	0.359912	0.0661427	0.655295	0.351679
30187457	1	1851.97	2839.52	2334.84	2398.75	1798.45	3744.41		10.8548	11.4714	11.1891	11.2281	10.8125	11.8705		11.1718		-0.316948	0.299637	0.017311	0.0562719	-0.35926	0.698728
30187457	1	2360.07	2312.45	2767.51	2409.26	2168.07	3678.56		11.2046	11.1752	11.4344	11.2344	11.0822	11.8449		11.2714		-0.0667811	-0.0961938	0.162975	-0.037023	-0.189199	0.573528
30187457	1	14843.7	16223.7	17589.4	22594.7	39362.6	7306.36		13.8576	13.9858	14.1024	14.4637	15.2645	12.8349		13.9819		-0.124367	0.00388284	0.120484	0.481766	1.28261	-1.14699
30187457	1	4882.45	6632.57	8905.31	10726.1	9160.92	12193.2		12.2534	12.6954	13.1205	13.3888	13.1613	13.5738		12.6897		-0.436341	0.0056212	0.43072	0.699101	0.471546	0.884053
30187457	1	18459.4	19829.4	28889.7	24849	30445.1	31591.8		14.1721	14.2754	14.8183	14.6009	14.8939	14.9473		14.4219		-0.249824	-0.146546	0.39637	0.179007	0.472025	0.525368
30187457	1	26831.2	25661.5	28599.5	33956.8	32948.8	31991.6		14.7116	14.6473	14.8037	15.0514	15.0079	14.9654		14.7209		-0.00925687	-0.0735634	0.0828203	0.33053	0.287055	0.244524
30187457	1	38283.3	31357.9	38692.7	38556.4	31419.4	41857.4		15.2244	14.9365	15.2398	15.2347	14.9394	15.3532		15.1336		0.0908485	-0.19704	0.106192	0.101102	-0.194211	0.219616
30187457	1	27947.7	31962.4	41023.2	37524.9	41550	47106.8		14.7704	14.9641	15.3242	15.1956	15.3426	15.5236		15.0196		-0.249118	-0.0554749	0.304592	0.175999	0.322998	0.504085
30187457	1	42250.5	37715.4	50237.5	57554.9	56357.2	56768		15.3667	15.2029	15.6165	15.8127	15.7823	15.7928		15.3953		-0.0286612	-0.192475	0.221136	0.41731	0.386971	0.397449
30187473	1	17964.2	25092	21475.9	18691	22974.7	22100.1		14.1328	14.6149	14.3904	14.1901	14.4878	14.4318		14.3794		-0.246566	0.235537	0.0110286	-0.189349	0.108355	0.0523597
30187488	1	8908.32	7330.88	12751.2	11840.5	18506.9	16850.8		13.1209	12.8398	13.6383	13.5314	14.1758	14.0405		13.1997		-0.0787459	-0.359912	0.438658	0.331754	0.976095	0.84085
30187488	1	9514.04	8178.58	11778.7	11734.7	14292.5	17464.4		13.2158	12.9976	13.5239	13.5185	13.803	14.0921		13.2458		-0.029946	-0.248153	0.278099	0.272701	0.55718	0.846338
30187488	1	14590.7	11237.4	18574.2	21004.1	25191.9	28036.5		13.8328	13.456	14.181	14.3584	14.6207	14.775		13.8233		0.00949191	-0.367238	0.357746	0.53512	0.797407	0.951755
30187488	1	12401.5	21094.2	17223.2	19345.6	18154.8	26495.8		13.5982	14.3646	14.0721	14.2397	14.1481	14.6935		14.0116		-0.413393	0.352943	0.0604502	0.228105	0.136445	0.68186
30187488	1	15948.2	14876.6	25743.5	27599.3	33351.3	33336.5		13.9611	13.8608	14.6519	14.7523	15.0255	15.0248		14.1579		-0.196821	-0.297172	0.493993	0.594416	0.867531	0.866889
30187499	1	4017.75	3924.26	6311.78	7323.32	6327.44	5459.31		11.9722	11.9382	12.6238	12.8383	12.6274	12.4145		12.1781		-0.205898	-0.239863	0.445761	0.660213	0.449337	0.236434
30187499	1	21893.1	14965.5	22587.5	18701.8	24915.1	30416.7		14.4182	13.8693	14.4632	14.1909	14.6047	14.8926		14.2503		0.16793	-0.380909	0.212978	-0.0593679	0.354474	0.642319
30187499	1	37868.4	30336.6	51491.3	45755.6	46424	46682.5		15.2087	14.8888	15.652	15.4817	15.5026	15.5106		15.2498		-0.041133	-0.361068	0.402201	0.231821	0.252743	0.260754
30187499	1	40469.2	42209.3	60146.3	55343.5	53013.6	61694		15.3045	15.3653	15.8762	15.7561	15.6941	15.9128		15.5153		-0.210796	-0.150059	0.360855	0.240794	0.178741	0.397511
30187499	1	109989	103997	177769	145720	134921	138706		16.747	16.6662	17.4396	17.1528	17.0418	17.0817		16.9509		-0.203946	-0.28476	0.488706	0.201896	0.0908166	0.130729
30187533	1	4122.76	4651.98	4481.31	5290.43	4198.76	6036.6		12.0094	12.1836	12.1297	12.3692	12.0357	12.5595		12.1076		-0.0981812	0.0760531	0.0221281	0.261594	-0.0718283	0.451946
30187533	1	3455.06	4878.74	5040.02	6498.05	5223.66	7545		11.7545	12.2523	12.2992	12.6658	12.3508	12.8813		12.102		-0.347505	0.150293	0.197212	0.56379	0.248844	0.779304
30187533	1	35977	37213.6	55434.3	47954.4	47073.5	57098.8		15.1348	15.1835	15.7585	15.5494	15.5226	15.8012		15.3589		-0.224152	-0.175399	0.399551	0.190436	0.163686	0.442232
30187537	1	2480.32	2092.99	2503.05	2701.56	3061.39	4082.59		11.2763	11.0314	11.2895	11.3996	11.58	11.9953		11.199		0.0772644	-0.167693	0.0904288	0.200533	0.380925	0.796226
30187537	1	1569.5	4097.95	3721.65	3604.22	3003.66	5250.79		10.6161	12.0007	11.8617	11.8155	11.5525	12.3583		11.4928		-0.876742	0.507851	0.368892	0.322635	0.0596714	0.865484
30187537	1	4449.19	3950.8	6177.11	5101.72	5072.84	6846.42		12.1193	11.9479	12.5927	12.3168	12.3086	12.7411		12.22		-0.100665	-0.272061	0.372726	0.0967762	0.0885868	0.521142
30187537	1	18178.5	17723.1	23815.2	21390	22372.5	26955.2		14.1499	14.1133	14.5396	14.3846	14.4494	14.7183		14.2676		-0.117686	-0.154281	0.271967	0.11702	0.181808	0.450648
30187537	1	19937.7	25867.1	32460.6	36477.8	31383.8	34578		14.2832	14.6588	14.9864	15.1547	14.9377	15.0776		14.6428		-0.359604	0.0160171	0.343587	0.511916	0.294918	0.434751
30187537	1	17067.3	31708.9	50919.5	47109.1	35783.5	46944.1		14.059	14.9526	15.6359	15.5237	15.127	15.5187		14.8825		-0.823544	0.0701083	0.753436	0.641225	0.244513	0.636164
30187537	1	30370.7	41543.5	58524	55769.3	47406.9	57095		14.8904	15.3423	15.8367	15.7672	15.5328	15.8011		15.3565		-0.466097	-0.0141548	0.480251	0.410696	0.176321	0.444589
30187537	1	45090.3	61206.4	76438.5	90983.4	68571	107797		15.4605	15.9014	16.222	16.4733	16.0653	16.718		15.8613		-0.400782	0.0400824	0.3607	0.612004	0.203999	0.856649
30187537	1	50648.4	85429.8	154349	149267	105199	145840		15.6282	16.3825	17.2358	17.1875	16.6828	17.154		16.4155		-0.787275	-0.0330533	0.820329	0.772026	0.267263	0.738522
30187537	1	68055.5	82955.8	107220	134381	101816	140843		16.0544	16.3401	16.7102	17.036	16.6356	17.1037		16.3682		-0.313808	-0.0281762	0.341984	0.667735	0.267369	0.7355
30187541	1	10150.7	9294.29	9756.12	11643.6	11329.1	13288.4		13.3093	13.1821	13.2521	13.5072	13.4677	13.6979		13.2478		0.0614559	-0.0657096	0.00425369	0.25941	0.219903	0.450046
30187541	1	12368.2	11737.3	15563.8	14174	16173.4	16500.6		13.5944	13.5188	13.9259	13.791	13.9813	14.0102		13.6797		-0.0853394	-0.160879	0.246218	0.111269	0.301647	0.330538
30187547	1	9640.03	9323.03	9852.55	6345.32	10897.6	9497.23		13.2348	13.1866	13.2663	12.6315	13.4117	13.2133		13.2292		0.00559257	-0.0426459	0.0370533	-0.597752	0.182493	-0.0159382
30187551	1	6754.18	7174.11	9937.28	11523.3	11254.5	11083.4		12.7216	12.8086	13.2786	13.4923	13.4582	13.4361		12.9363		-0.214697	-0.127677	0.342374	0.556008	0.521953	0.499853
30187551	1	8131	11585.6	15813.8	12901.4	11940.9	14959.7		12.9892	13.5	13.9489	13.6552	13.5436	13.8688		13.4794		-0.490169	0.0206569	0.469512	0.175858	0.0642405	0.389407
30187551	1	9153.63	13310.3	19465.2	12926.3	20244.4	14173.4		13.1601	13.7003	14.2486	13.658	14.3052	13.7909		13.703		-0.542868	-0.00274143	0.545609	-0.044977	0.602236	0.0879024
30187551	1	18242.7	16574.1	21123.1	17362.1	18226.3	19207.5		14.155	14.0166	14.3665	14.0837	14.1537	14.2294		14.1794		-0.0243714	-0.16276	0.187132	-0.0957474	-0.0256694	0.0499781
30187551	1	20618.9	22611.3	31525.5	27082	27565.5	30094.3		14.3317	14.4648	14.9442	14.725	14.7506	14.8772		14.5802		-0.248544	-0.115466	0.36401	0.144824	0.170353	0.29698
30187551	1	23221.1	34012.1	41997.3	38176.4	43127	37626		14.5032	15.0538	15.358	15.2204	15.3963	15.1994		14.9716		-0.46849	0.0821206	0.386369	0.248753	0.424665	0.227801
30187551	1	21438.9	22841.8	29559	31206	34626.1	33859		14.3879	14.4794	14.8513	14.9295	15.0796	15.0472		14.5729		-0.184938	-0.0934905	0.278429	0.356654	0.506691	0.47437
30187552	1	3818.24	8631.45	7997.65	8851.79	7887.59	10218.5		11.8987	13.0754	12.9654	13.1118	12.9454	13.3189		12.6465		-0.747788	0.428907	0.31888	0.465274	0.298889	0.67242
30187552	1	30684.3	54530.7	68664.9	54467.6	38460.5	64580.8		14.9052	15.7348	16.0673	15.7331	15.2311	15.9788		15.5691		-0.663879	0.165688	0.498191	0.164017	-0.338005	0.409723
30187552	1	44947.6	79613.4	84174.9	92541.5	118990	108851		15.456	16.2807	16.3611	16.4978	16.8605	16.732		16.0326		-0.576638	0.24813	0.328508	0.465218	0.827893	0.699405
30187556	1	2734.47	4374.67	4763.55	8505.13	7414.78	7012.84		11.417	12.095	12.2178	13.0541	12.8562	12.7758		11.9099		-0.492897	0.185017	0.30788	1.14418	0.946246	0.865841
30187556	1	2480.59	3419.75	5443.89	8486.67	7073.11	5700.94		11.2765	11.7397	12.4104	13.051	12.7881	12.477		11.8089		-0.532388	-0.0691808	0.601568	1.24213	0.979274	0.66813
30187556	1	6457.97	9805.43	17677.9	16402.7	19548.6	16949.8		12.6569	13.2594	14.1097	14.0016	14.2548	14.049		13.342		-0.685099	-0.0825984	0.767697	0.659683	0.912814	0.707014
30187556	1	6249.61	5862.88	6266.3	14419.1	12552.7	13731.8		12.6095	12.5174	12.6134	13.8157	13.6157	13.7452		12.5801		0.0294353	-0.0627199	0.0332846	1.23558	1.03559	1.16512
30187556	1	7912.1	8547.55	12085.3	9786.27	11748.8	10878.4		12.9498	13.0613	13.561	13.2565	13.5202	13.4092		13.1907		-0.240857	-0.129407	0.370265	0.0658422	0.329526	0.218478
30187556	1	12220.6	13831.1	24314.2	13174.9	16954.7	19865		13.577	13.7556	14.5695	13.6855	14.0494	14.2779		13.9674		-0.39036	-0.21176	0.60212	-0.281884	0.0820052	0.310549
30187571	1	1780.33	2110.83	1677.27	3109.76	2651.5	1699.23		10.7979	11.0436	10.7119	11.6026	11.3726	10.7307		10.8511		-0.053213	0.192456	-0.139243	0.751449	0.521453	-0.120472
30187576	1	3288.02	8924.51	4685.94	6659.4	7127.9	6934.36		11.683	13.1236	12.1941	12.7012	12.7993	12.7595		12.3336		-0.650559	0.789997	-0.139439	0.367615	0.465701	0.425988
30187576	1	6824.2	9492.86	8815	11460.3	10396.6	9047.88		12.7364	13.2126	13.1057	13.4844	13.3438	13.1434		13.0183		-0.281828	0.194355	0.0874724	0.466082	0.325547	0.125091
30187576	1	5148.71	15470.4	9376.08	10650.8	10560.2	9408.58		12.33	13.9172	13.1948	13.3787	13.3664	13.1998		13.1473		-0.817333	0.769892	0.0474408	0.231344	0.219026	0.0524338
30187576	1	7533.22	12719.2	12632.3	16476.7	16763.3	14164		12.8791	13.6347	13.6248	14.0081	14.033	13.7899		13.3795		-0.500483	0.255188	0.245295	0.628601	0.653485	0.41041
30187576	1	7048.94	13993.4	9253.49	14415.5	15196	11340.2		12.7832	13.7725	13.1758	13.8153	13.8914	13.4692		13.2438		-0.46062	0.528647	-0.0680273	0.571522	0.647594	0.225348
30187576	1	11013.4	17801.5	13195.7	22535.2	19675.1	20902.7		13.427	14.1197	13.6878	14.4599	14.2641	14.3514		13.7448		-0.317849	0.37489	-0.0570404	0.715071	0.519258	0.60658
30187576	1	20591.7	51203.1	41231.3	58442.8	54364.2	43065.5		14.3298	15.6439	15.3315	15.8347	15.7304	15.3942		15.1017		-0.77195	0.54222	0.22973	0.733014	0.628646	0.292522
30187576	1	38188.9	73771.9	48539.7	82006.4	99115.3	69487.1		15.2209	16.1708	15.5669	16.3234	16.5968	16.0845		15.6528		-0.431975	0.517941	-0.0859659	0.670606	0.943977	0.431614
30187580	1	11734.6	10743.8	13353.9	14962	15374	21425.7		13.5185	13.3912	13.705	13.869	13.9082	14.3871		13.5382		-0.0197405	-0.147014	0.166754	0.330789	0.369981	0.848832
30187606	1	7472.49	9373.8	8758.04	9559.69	12245.5	12110.2		12.8674	13.1944	13.0964	13.2227	13.58	13.5639		13.0527		-0.185354	0.14169	0.0436644	0.17002	0.52723	0.511212
30187606	1	12043.4	13198.6	15803.9	14199.5	15833.4	17431.1		13.556	13.6881	13.948	13.7936	13.9507	14.0894		13.7307		-0.174727	-0.0425827	0.21731	0.0628662	0.220001	0.358691
30187607	1	17371.2	12534.5	23958.7	15384	25184.6	23062.6		14.0844	13.6136	14.5483	13.9091	14.6203	14.4933		14.0821		0.00231362	-0.468479	0.466166	-0.172955	0.53816	0.411175
30187607	1	23354.2	15245.9	23061.7	20104.3	25075.7	23868.7		14.5114	13.8961	14.4932	14.2952	14.614	14.5428		14.3002		0.211147	-0.404112	0.192965	-0.0050268	0.313756	0.242588
30187607	1	21877.4	14176.5	30607	26295.4	25748.5	33407.4		14.4172	13.7912	14.9016	14.6825	14.6522	15.0279		14.37		0.0471762	-0.578771	0.531595	0.312544	0.282221	0.657899
30187607	1	19808.9	15014	22823.2	19177.2	23440.8	20677.5		14.2739	13.874	14.4782	14.2271	14.5167	14.3358		14.2087		0.0651623	-0.334678	0.269516	0.0184091	0.308036	0.127075
30187623	1	6706.18	5055.88	6250.59	3887.97	4316.38	5561.34		12.7113	12.3037	12.6098	11.9248	12.0756	12.4412		12.5416		0.169676	-0.237854	0.0681781	-0.616798	-0.465994	-0.100382
30187623	1	4434.28	3106.88	3953.27	3787.01	3086.98	3303.82		12.1145	11.6013	11.9488	11.8868	11.592	11.6899		11.8882		0.226296	-0.286939	0.0606421	-0.00134582	-0.29621	-0.198271
30187623	1	4404.11	3791.29	4994.59	2972.66	3075.46	3344.88		12.1046	11.8885	12.2861	11.5375	11.5866	11.7077		12.0931		0.0115495	-0.204613	0.193063	-0.555549	-0.506501	-0.385345
30187623	1	7495.26	5104.54	7028.42	3650.32	4249.51	5669.41		12.8718	12.3176	12.779	11.8338	12.0531	12.469		12.6561		0.215659	-0.33854	0.122881	-0.822298	-0.603023	-0.187123
30187623	1	8876	6101.52	8535.43	3908.46	7211.85	5911.68		13.1157	12.575	13.0592	11.9324	12.8162	12.5294		12.9166		0.199063	-0.341679	0.142616	-0.984246	-0.100479	-0.387279
30187623	1	8637.88	5690.61	8976.61	5031.99	5741.14	6401.91		13.0765	12.4744	13.132	12.2969	12.4871	12.6443		12.8943		0.182201	-0.419895	0.237694	-0.597349	-0.407139	-0.249973
30187623	1	21429.3	25917.3	22022.3	17594.5	35832	10330.4		14.3873	14.6616	14.4267	14.1028	15.129	13.3346		14.4919		-0.104571	0.169762	-0.0651907	-0.389025	0.637095	-1.15725
30187623	1	19829.4	15541.9	23290.7	15211.3	19476.6	20543.6		14.2754	13.9239	14.5075	13.8929	14.2495	14.3264		14.2356		0.0397845	-0.311687	0.271902	-0.342708	0.013887	0.0908365
30187623	1	32564.6	21318.9	31079.5	15830.5	21139.1	20480.8		14.991	14.3798	14.9237	13.9504	14.3676	14.322		14.7648		0.226171	-0.385001	0.15883	-0.814428	-0.397217	-0.442859
30187623	1	22756.4	24387.2	30741.2	26199	30263.1	27497		14.474	14.5738	14.9079	14.6772	14.8853	14.747		14.6519		-0.177916	-0.0780651	0.255981	0.0253234	0.233372	0.0950824
30187623	1	50269.3	30015.7	41739.4	25058.5	29684.4	25235.5		15.6174	14.8734	15.3491	14.613	14.8574	14.6232		15.28		0.33741	-0.406552	0.0691417	-0.666969	-0.422562	-0.656815
30187623	1	50028.4	28260.7	41410.2	21858	30031.4	29618.4		15.6105	14.7865	15.3377	14.4159	14.8742	14.8542		15.2449		0.365573	-0.458381	0.0928083	-0.829012	-0.370705	-0.390685
30187623	1	49527.3	47814.8	49085.7	35960.1	46333.7	44506.7		15.5959	15.5452	15.583	15.1341	15.4998	15.4417		15.5747		0.0212298	-0.0295382	0.00830835	-0.440597	-0.0749337	-0.132972
30187623	1	33831.1	34119.3	33513.4	39958.4	40159.2	37934.1		15.0461	15.0583	15.0324	15.2862	15.2934	15.2112		15.0456		0.00045822	0.0126964	-0.0131546	0.240607	0.247839	0.165605
30187623	1	71009	53259.5	50590.2	44101.1	45503.8	51500.8		16.1157	15.7008	15.6266	15.4285	15.4737	15.6523		15.8143		0.301369	-0.113593	-0.187775	-0.38582	-0.340645	-0.16204
30187623	1	110168	92637.3	102269	97897.2	104574	67201.5		16.7493	16.4993	16.642	16.579	16.6742	16.0362		16.6302		0.119123	-0.130911	0.0117875	-0.0512371	0.043947	-0.59401
30187623	1	115885	90058.6	118511	68502.7	83608.8	75063		16.8223	16.4586	16.8547	16.0639	16.3514	16.1958		16.7119		0.110478	-0.253283	0.142805	-0.647986	-0.360493	-0.516045
30187623	1	111187	88487.7	95173.9	66522.3	72142.2	67650.2		16.7626	16.4332	16.5383	16.0215	16.1386	16.0458		16.578		0.184599	-0.144844	-0.0397556	-0.556484	-0.439479	-0.532228
30187623	1	222974	164773	173042	152068	161026	165411		17.7665	17.3301	17.4008	17.2144	17.2969	17.3357		17.4991		0.267386	-0.169016	-0.0983702	-0.284777	-0.202195	-0.163433
30187642	1	4182.38	5342.62	5299.19	5484.5	5178.5	8913.32		12.0301	12.3833	12.3716	12.4211	12.3383	13.1217		12.2617		-0.231557	0.121667	0.10989	0.159479	0.0766538	0.860082
30187642	1	4925.24	6406.13	8607.72	7702.14	8026.4	12595		12.266	12.6452	13.0714	12.911	12.9705	13.6206		12.6609		-0.394898	-0.01564	0.410538	0.250166	0.309661	0.959687
30187642	1	2007.86	6607.14	10054	11291	5133.72	12777.7		10.9714	12.6898	13.2955	13.4629	12.3258	13.6413		12.3189		-1.34747	0.3709	0.976567	1.14398	0.00687887	1.32243
30187642	1	3876.14	6319.63	7479.31	7873.87	7951.66	11386.5		11.9204	12.6256	12.8687	12.9429	12.957	13.475		12.4716		-0.551168	0.154052	0.397116	0.471284	0.485466	1.00346
30187642	1	3831.28	5220.14	6757.73	5845.92	7093.66	7781.74		11.9036	12.3499	12.7223	12.5132	12.7923	12.9259		12.3253		-0.421659	0.024604	0.397055	0.187945	0.467046	0.600607
30187642	1	3646.94	5737.76	9181.53	9458.06	6646.89	12264.1		11.8325	12.4863	13.1645	13.2073	12.6985	13.5822		12.4944		-0.66195	-0.00814768	0.670098	0.712908	0.204043	1.08773
30187642	1	3813.5	6854	8241.04	7882.45	7293.51	8608.11		11.8969	12.7427	13.0086	12.9444	12.8324	13.0715		12.5494		-0.652514	0.193317	0.459197	0.395015	0.282983	0.522066
30187642	1	7145.54	11504.1	11917.3	14567.6	9034.61	21110.8		12.8028	13.4899	13.5408	13.8305	13.1412	14.3657		13.2778		-0.474993	0.212042	0.262951	0.552654	-0.136573	1.08787
30187642	1	6738.28	9604.8	11665.7	15965.6	11854.6	19458.7		12.7182	13.2295	13.51	13.9627	13.5332	14.2481		13.1526		-0.434397	0.0769776	0.35742	0.810118	0.380599	1.09556
30187642	1	10391.4	14726.1	19023.5	17553.9	14852.9	22782.1		13.3431	13.8461	14.2155	14.0995	13.8585	14.4756		13.8016		-0.458463	0.0445245	0.413939	0.297946	0.056902	0.674056
30187642	1	6965.51	10410.3	16305.3	19657.3	11975.9	23717.8		12.766	13.3457	13.9931	14.2628	13.5478	14.5337		13.3683		-0.602249	-0.0225438	0.624793	0.894513	0.179582	1.16542
30187642	1	11964.7	29324	39075.2	43379.3	33832.4	55068.2		13.5465	14.8398	15.254	15.4047	15.0461	15.7489		14.5468		-1.00026	0.293042	0.707213	0.857969	0.499368	1.20218
30187642	1	17557.1	29463	36841.3	42389.6	28184.9	56868.5		14.0998	14.8466	15.169	15.3714	14.7826	15.7953		14.7051		-0.605371	0.141477	0.463894	0.666283	0.077496	1.0902
30187642	1	15142.1	36326.5	37947.6	53562	34708.3	79965.6		13.8863	15.1487	15.2117	15.7089	15.083	16.2871		14.7489		-0.862633	0.399822	0.462811	0.960011	0.334082	1.53818
30187642	1	38445.3	46842.3	93216.5	98496.5	67427.1	127025		15.2305	15.5155	16.5083	16.5878	16.041	16.9548		15.7514		-0.520929	-0.235922	0.75685	0.836337	0.289593	1.20331
30187646	1	358223	462059	344956	425874	623905	339214		18.4505	18.8177	18.3961	18.7001	19.251	18.3718		18.5548		-0.104258	0.262962	-0.158704	0.145312	0.696211	-0.18292
30187651	1	11038.4	9177.54	13540.7	10203.8	11595.8	8526.59		13.4302	13.1639	13.725	13.3168	13.5013	13.0578		13.4397		-0.00947064	-0.275824	0.285294	-0.122902	0.0616018	-0.381962
30187651	1	13794	12933.8	14610	13111.2	15556	12207		13.7517	13.6589	13.8347	13.6785	13.9252	13.5754		13.7484		0.00332608	-0.0895673	0.0862412	-0.0699134	0.176762	-0.172997
30187651	1	14540.8	16986.4	22120.2	17607.8	18528.1	21569.9		13.8278	14.0521	14.4331	14.1039	14.1774	14.3967		14.1043		-0.276509	-0.0522357	0.328744	-0.000400864	0.0730976	0.2924
30187651	1	41764.1	53333.9	74807.7	67246.4	62994.5	68353.9		15.35	15.7028	16.1909	16.0372	15.9429	16.0607		15.7479		-0.397903	-0.0451158	0.443019	0.28929	0.195058	0.312855
30187689	1	2912.25	2186.06	3541.95	3307.25	3527.51	4364.72		11.5079	11.0941	11.7903	11.6914	11.7844	12.0917		11.4641		0.0437976	-0.370003	0.326206	0.227295	0.320312	0.627552
30187689	1	3791.21	3954.32	3924.46	5178.83	4588.47	5655.47		11.8884	11.9492	11.9383	12.3384	12.1638	12.4654		11.9253		-0.0368686	0.0239033	0.0129653	0.413099	0.238486	0.54012
30187689	1	6191	6915.85	5980.28	10106.9	7304.61	8118.34		12.596	12.7557	12.546	13.3031	12.8346	12.987		12.6325		-0.0365917	0.123142	-0.0865503	0.67051	0.202044	0.35442
30187689	1	6245.36	4373.85	5459.26	5668.48	8196.52	8058.62		12.6086	12.0947	12.4145	12.4687	13.0008	12.9763		12.3726		0.235986	-0.277894	0.0419073	0.0961648	0.628213	0.603735
30187689	1	8518	9350.82	9758.43	15975.7	10448.6	12351.3		13.0563	13.1909	13.2524	13.9636	13.351	13.5924		13.1665		-0.110238	0.0243406	0.0858973	0.797057	0.184479	0.425838
30187689	1	21600.3	20187.3	32967.6	31862.9	31156.3	40065.2		14.3988	14.3012	15.0088	14.9596	14.9272	15.2901		14.5696		-0.1708	-0.268399	0.439199	0.390028	0.357673	0.7205
30187689	1	24762.6	17223.8	23395.3	27122.5	27896.3	30610.4		14.5959	14.0721	14.5139	14.7272	14.7678	14.9017		14.394		0.201904	-0.321859	0.119956	0.33323	0.373816	0.507762
30187689	1	28244.7	20663.1	18556.2	31767.6	26713.3	31825.2		14.7857	14.3348	14.1796	14.9553	14.7053	14.9579		14.4334		0.352333	-0.0985896	-0.253743	0.521907	0.27191	0.524523
30187689	1	25001.8	27154.9	42820.4	45219.3	38408.2	46858		14.6097	14.7289	15.386	15.4647	15.2291	15.516		14.9082		-0.298482	-0.179301	0.477783	0.556424	0.320897	0.607779
30187689	1	25008.2	24628.9	30290	53852.4	37265.2	62128.2		14.6101	14.5881	14.8866	15.7167	15.1855	15.923		14.6949		-0.0847964	-0.106847	0.191644	1.02181	0.490631	1.22805
30187689	1	24019.3	24703.2	39519.4	46400.8	26872.7	42055.3		14.5519	14.5924	15.2703	15.5019	14.7139	15.36		14.8049		-0.252956	-0.212453	0.465409	0.696998	-0.0910099	0.555138
30187689	1	45867.5	57218.6	81305.6	108524	78993.5	101599		15.4852	15.8042	16.3111	16.7277	16.2694	16.6325		15.8668		-0.381631	-0.0626202	0.444252	0.860845	0.402631	0.765712
30187689	1	87126.1	114503	153360	207926	191719	125683		16.4108	16.805	17.2266	17.6657	17.5486	16.9394		16.8141		-0.403318	-0.00910561	0.412424	0.851576	0.734496	0.125291
30187689	1	431674	533586	888088	1.01291e+06	750367	976548		18.7196	19.0254	19.7603	19.9501	19.5172	19.8973		19.1684		-0.448847	-0.143067	0.591914	0.781641	0.348808	0.728903
30187689	1	1.43398e+06	1.59633e+06	2.60369e+06	3.12124e+06	2.48859e+06	3.12276e+06		20.4516	20.6063	21.3121	21.5737	21.2469	21.5744		20.79		-0.338423	-0.18369	0.522112	0.783673	0.456885	0.784378
30187706	1	2211.96	2560.47	2005.66	1304.65	1332.79	2063.36		11.1111	11.3222	10.9699	10.3495	10.3802	11.0108		11.1344		-0.0232757	0.187805	-0.164529	-0.784937	-0.754155	-0.123605
30187706	1	3217.66	3236.8	4731.43	5712.42	5301.75	6458.69		11.6518	11.6604	12.2081	12.4799	12.3723	12.657		11.8401		-0.188274	-0.179717	0.36799	0.639817	0.532183	0.816955
30187706	1	2622.86	3988.57	4203.82	4981	5865.75	6392.53		11.3569	11.9617	12.0375	12.2822	12.5181	12.6422		11.7854		-0.428429	0.176301	0.252128	0.496864	0.732743	0.856816
30187706	1	5268.7	8361.48	9265.29	9226.35	8202.56	12517.2		12.3632	13.0295	13.1776	13.1715	13.0019	13.6116		12.8568		-0.493565	0.172744	0.320822	0.314747	0.145061	0.754828
30187706	1	5533.53	8084.03	7283.36	8214.91	8690.04	10771.5		12.434	12.9809	12.8304	13.004	13.0851	13.3949		12.7484		-0.314427	0.232449	0.0819779	0.255618	0.336736	0.646522
30187706	1	7219.93	10128.8	10378.2	12390.2	7085.94	12793.7		12.8178	13.3062	13.3413	13.5969	12.7907	13.6431		13.1551		-0.337302	0.151104	0.186198	0.441836	-0.364327	0.488072
30187706	1	9695.1	11465.1	16460.7	16340.6	9302.9	16745.5		13.243	13.485	14.0067	13.9962	13.1835	14.0315		13.5782		-0.335208	-0.0932862	0.428494	0.417923	-0.394783	0.453243
30187706	1	10404.6	11030.4	12010	14750.3	11037.6	17146.1		13.3449	13.4292	13.5519	13.8485	13.4301	14.0656		13.442		-0.0970902	-0.0128299	0.10992	0.406431	-0.0118817	0.623571
30187706	1	14093.5	13069.2	18971.5	16019.8	17609.4	13267.9		13.7827	13.6739	14.2115	13.9676	14.1041	13.6957		13.8894		-0.106653	-0.215504	0.322157	0.0781768	0.214665	-0.193735
30187706	1	17806.5	19439.5	24939.5	23623.8	24283.4	24266.2		14.1201	14.2467	14.6061	14.528	14.5677	14.5667		14.3243		-0.204207	-0.07762	0.281827	0.203636	0.243365	0.242342
30187706	1	12991.8	15784.4	20130.4	22620.3	16071.3	25353.8		13.6653	13.9462	14.2971	14.4653	13.9722	14.6299		13.9695		-0.304222	-0.0233282	0.32755	0.495789	0.00265688	0.660372
30187706	1	14142.7	17929	26008.8	24988	21782.8	22042.2		13.7878	14.13	14.6667	14.6089	14.4109	14.428		14.1948		-0.407058	-0.0648236	0.471882	0.414118	0.216068	0.23315
30187706	1	10308.5	15774	16090.9	20104.5	18480.3	24002.3		13.3316	13.9453	13.974	14.2952	14.1737	14.5509		13.7503		-0.418705	0.195006	0.223699	0.544973	0.423445	0.800631
30187706	1	14710.3	17465.5	22713.6	28560.6	17773	28555.1		13.8445	14.0922	14.4713	14.8017	14.1174	14.8015		14.136		-0.29147	-0.0437865	0.335257	0.66573	-0.0186107	0.665453
30187706	1	19265.4	25839.8	27587.7	31428.9	28780.9	35839.8		14.2337	14.6573	14.7517	14.9398	14.8128	15.1293		14.5476		-0.313866	0.10972	0.204147	0.392216	0.265235	0.581688
30187706	1	15097.3	16622.1	19662.4	19350.9	19825.7	22076.9		13.882	14.0208	14.2632	14.2401	14.2751	14.4303		14.0553		-0.173322	-0.0345067	0.207829	0.18479	0.219758	0.374927
30187706	1	13343	21618.3	28538.2	31186.1	22130.4	34565.4		13.7038	14.4	14.8006	14.9286	14.4337	15.077		14.3015		-0.597662	0.0985127	0.499149	0.62716	0.132289	0.775584
30187706	1	14849.4	21812.1	22669.7	23961.6	21463.9	26285.7		13.8581	14.4128	14.4685	14.5484	14.3896	14.682		14.2465		-0.388359	0.166359	0.222	0.301959	0.143142	0.435513
30187706	1	13138.4	15248.4	18173	19488.5	19403.2	24221.5		13.6815	13.8964	14.1495	14.2503	14.244	14.564		13.9091		-0.227625	-0.0127589	0.240384	0.341208	0.334882	0.654877
30187706	1	12761.5	18838.4	24727.5	27547.9	20691.8	30329.9		13.6395	14.2014	14.5938	14.7497	14.3368	14.8885		14.1449		-0.505394	0.0564777	0.448916	0.604746	0.191861	0.743543
30187706	1	15139.4	20155	28188.9	34698	20070.2	31435.3		13.886	14.2988	14.7828	15.0826	14.2928	14.9401		14.3226		-0.43655	-0.0237215	0.460271	0.759996	-0.0298005	0.617529
30187706	1	19644.8	25201	23456.3	27564.4	26058.3	35277.7		14.2619	14.6212	14.5177	14.7505	14.6695	15.1065		14.4669		-0.205055	0.15428	0.0507751	0.283602	0.202543	0.639556
30187706	1	15296.2	14865.2	18514.1	22246.7	20710.2	24373.4		13.9009	13.8597	14.1763	14.4413	14.3381	14.573		13.979		-0.0780756	-0.119303	0.197378	0.462344	0.359096	0.594062
30187706	1	14243.4	22966.2	22283.1	25329.4	19338	24146.1		13.798	14.4872	14.4437	14.6285	14.2392	14.5595		14.243		-0.444956	0.244258	0.200698	0.385559	-0.00381658	0.316534
30187706	1	24961.4	25515.1	30006.9	30301.5	26384.1	38260.1		14.6074	14.6391	14.873	14.8871	14.6874	15.2236		14.7065		-0.0990836	-0.067429	0.166513	0.180608	-0.0191161	0.517057
30187706	1	23190.1	39517.4	50393.4	48841.2	42542.3	68256.8		14.5012	15.2702	15.6209	15.5758	15.3766	16.0587		15.1308		-0.629567	0.139411	0.490156	0.445019	0.245819	0.927895
30187706	1	22073.6	25163.4	34031.2	35287.5	23141.5	37016.2		14.43	14.619	15.0546	15.1069	14.4982	15.1759		14.7012		-0.271179	-0.0821769	0.353356	0.405657	-0.203018	0.474656
30187706	1	26278.4	22574.2	28810.5	28888.9	27606.2	36099.6		14.6816	14.4624	14.8143	14.8182	14.7527	15.1397		14.6528		0.0288259	-0.190373	0.161547	0.165466	0.0999417	0.486931
30187706	1	16448	21081.5	22896.7	29130.3	21248.3	37277.2		14.0056	14.3637	14.4829	14.8302	14.3751	15.186		14.2841		-0.278429	0.0796332	0.198795	0.546174	0.0910029	0.90195
30187706	1	22460.8	24454.6	39271.2	38889.7	29313.5	41495.2		14.4551	14.5778	15.2612	15.2471	14.8393	15.3407		14.7647		-0.309584	-0.186891	0.496475	0.482391	0.0745684	0.57595
30187706	1	19450.4	30228.8	31552	42469.8	31462.9	36176		14.2475	14.8836	14.9454	15.3741	14.9414	15.1427		14.6922		-0.444687	0.191438	0.253248	0.681952	0.249168	0.450548
30187706	1	31737.6	36727.6	51626.7	54500	51988.7	50202.9		14.9539	15.1646	15.6558	15.734	15.6659	15.6155		15.2581		-0.304199	-0.0935277	0.397727	0.475865	0.407805	0.35738
30187706	1	24699.9	30462	39178.1	36500.5	44973	43416.9		14.5922	14.8947	15.2578	15.1556	15.4568	15.406		14.9149		-0.322683	-0.0201776	0.342861	0.24073	0.54187	0.491069
30187706	1	28868.6	38263.4	37847.1	42287.2	37027.1	42768.2		14.8172	15.2237	15.2079	15.3679	15.1763	15.3842		15.0829		-0.265715	0.140748	0.124967	0.285006	0.0933666	0.301321
30187706	1	34477.5	52068.5	58178.4	60435.9	54277.1	64759.2		15.0734	15.6681	15.8282	15.8831	15.7281	15.9828		15.5232		-0.449861	0.144893	0.304968	0.359888	0.204826	0.459569
30187706	1	31255.9	50673.4	51552.2	55754.5	57713	66876		14.9318	15.6289	15.6537	15.7668	15.8166	16.0292		15.4048		-0.473001	0.224099	0.248903	0.361958	0.411766	0.624358
30187706	1	36671.9	66622.5	53335.3	50044.2	44478.7	98918.2		15.1624	16.0237	15.7028	15.6109	15.4408	16.5939		15.6296		-0.467251	0.394084	0.0731662	-0.0187208	-0.188811	0.964311
30187706	1	47058.1	48381.8	67056.2	63323.7	62436	81706.7		15.5222	15.5622	16.0331	15.9505	15.9301	16.3182		15.7058		-0.18365	-0.143627	0.327277	0.244652	0.224284	0.612362
30187706	1	39740.7	50300	59704.3	52520.3	86321.7	67599.2		15.2783	15.6183	15.8655	15.6806	16.3974	16.0447		15.5874		-0.309052	0.0308868	0.278166	0.0932053	0.810053	0.457336
30187706	1	57622.8	61210.9	78025.5	66403.8	46115.2	75368.4		15.8144	15.9015	16.2517	16.019	15.493	16.2017		15.9892		-0.174817	-0.0876696	0.262487	0.0298066	-0.496215	0.212502
30187706	1	89196.4	84197.4	136336	108992	120273	137381		16.4447	16.3615	17.0568	16.7339	16.876	17.0678		16.621		-0.176301	-0.259511	0.435812	0.11287	0.254958	0.446824
30187706	1	103629	135611	141526	160579	99296.2	182884		16.6611	17.0491	17.1107	17.2929	16.5995	17.4806		16.9403		-0.279231	0.108816	0.170416	0.35263	-0.340844	0.540272
30187713	1	17636.7	20799.1	25216.3	24228.9	27438.5	29203.5		14.1063	14.3442	14.6221	14.5644	14.7439	14.8339		14.3575		-0.251241	-0.0132969	0.264538	0.206913	0.386385	0.476321
30187717	1	13458.6	24263.4	27269.9	22769.1	21578.8	22116.2		13.7162	14.5665	14.735	14.4748	14.3973	14.4328		14.3393		-0.623009	0.227241	0.395769	0.135538	0.0580727	0.093561
30187727	1	12986.8	16591.9	22386.2	16367.3	27698.7	23113.3		13.6648	14.0182	14.4503	13.9985	14.7575	14.4964		14.0444		-0.379668	-0.0262307	0.405899	-0.0458932	0.713108	0.452013
30187727	1	24772	29075.2	26834.1	26550.3	21007.2	37732.7		14.5964	14.8275	14.7118	14.6964	14.3586	15.2035		14.7119		-0.115477	0.115599	-0.000122195	-0.0154599	-0.353307	0.491627
30187732	1	34501.4	41785.5	55326.9	48902.9	54938.5	49471		15.0744	15.3507	15.7557	15.5776	15.7455	15.5943		15.3936		-0.319224	-0.0428769	0.362101	0.184039	0.351939	0.200703
30187740	1	40106.5	39908.3	37044.8	39043.9	54374.7	33194.3		15.2915	15.2844	15.177	15.2528	15.7306	15.0186		15.251		0.0405716	0.0334225	-0.0739941	0.00183014	0.47967	-0.23233
30187752	1	6698.89	8732.02	9988.1	10634.6	9476.41	8666.89		12.7097	13.0921	13.286	13.3765	13.2101	13.0813		13.0293		-0.319561	0.0628328	0.256728	0.347207	0.180859	0.0520312
30187752	1	90480.4	137173	155317	134012	141450	124149		16.4653	17.0656	17.2449	17.032	17.1099	16.9217		16.9253		-0.459954	0.140367	0.319588	0.106728	0.184661	-0.00355527
30187765	1	2750.43	2122.04	4299.55	3040.06	2430.73	5056.29		11.4254	11.0512	12.07	11.5699	11.2472	12.3039		11.5155		-0.0901078	-0.464314	0.554421	0.0543321	-0.268377	0.788313
30187771	1	1820.45	5171.84	4916.12	6692.68	6891.77	8341.48		10.8301	12.3365	12.2633	12.7084	12.7507	13.0261		11.8099		-0.979869	0.526512	0.453357	0.898419	0.940709	1.21614
30187771	1	20232.7	27955.2	29566.9	40302.3	37415.5	46383.6		14.3044	14.7708	14.8517	15.2986	15.1913	15.5013		14.6423		-0.337905	0.128518	0.209387	0.656265	0.54904	0.859017
30187796	1	3189.44	4262.74	5422.37	6150.12	4253.47	6201.48		11.6391	12.0576	12.4047	12.5864	12.0544	12.5984		12.0338		-0.394699	0.0237779	0.370921	0.552612	0.0206361	0.564608
30187797	1	1220.44	3426.02	3491.27	3429.04	2360.55	3583.69		10.2532	11.7423	11.7695	11.7436	11.2049	11.8072		11.255		-1.00183	0.487304	0.514523	0.488576	-0.0501083	0.552214
30187801	1	5206.13	4946.7	6639.61	6913.14	7117.18	6960.83		12.346	12.2723	12.6969	12.7551	12.7971	12.765		12.4384		-0.0923808	-0.166125	0.258506	0.316749	0.358712	0.326666
30187801	1	6070.8	8349.61	12770.3	12170.7	11174.4	13180.7		12.5677	13.0275	13.6405	13.5711	13.4479	13.6861		13.0786		-0.510884	-0.0510616	0.561946	0.492565	0.369352	0.607585
30187801	1	47172.6	74674.4	101424	103834	95631.5	107083		15.5257	16.1883	16.63	16.6639	16.5452	16.7084		16.1147		-0.589012	0.073652	0.51536	0.549251	0.430523	0.593701
30187803	1	7952.84	9284.3	8990.43	8653.77	11047.6	11137		12.9573	13.1806	13.1342	13.0791	13.4314	13.4431		13.0907		-0.133414	0.0899088	0.0435053	-0.0115563	0.340781	0.352401
30187803	1	7488.1	9572.76	11519.8	9653.95	8681.37	11964.6		12.8704	13.2247	13.4918	13.2369	13.0837	13.5465		13.1956		-0.325259	0.0290762	0.296183	0.0412604	-0.111937	0.350845
30187831	1	12963.7	339.133	4444.54	2831.73	6875.03	5739.93		13.6622	8.40571	12.1178	11.4675	12.7471	12.4868		11.3952		2.26695	-2.98953	0.722582	0.0722285	1.35191	1.09158
30187831	1	26185.8	855.114	10326.2	4333.47	14281.4	14701.5		14.6765	9.73997	13.334	12.0813	13.8018	13.8437		12.5835		2.093	-2.84353	0.750524	-0.502192	1.21835	1.26018
30187831	1	42157	9707.49	22728.8	15546.9	27809.5	24314.2		15.3635	13.2449	14.4722	13.9243	14.7633	14.5695		14.3602		1.00328	-1.11532	0.112034	-0.435862	0.403087	0.209308
30187839	1	2572.02	4080.51	3495.01	3413.9	3205.01	3429.23		11.3287	11.9945	11.7711	11.7372	11.6461	11.7437		11.6981		-0.369414	0.296432	0.0729824	0.0391052	-0.051988	0.045567
30187839	1	3524.43	6246.44	7601.76	8031.32	5948.61	6226.67		11.7832	12.6088	12.8921	12.9714	12.5383	12.6042		12.428		-0.644863	0.180782	0.464081	0.543385	0.110301	0.17621
30187839	1	12789.5	14486.5	18578.7	22663.9	16409.2	21398.5		13.6427	13.8224	14.1814	14.4681	14.0022	14.3852		13.8822		-0.239481	-0.0597277	0.299209	0.585957	0.120066	0.503073
30187839	1	22032.6	29304.9	38510	35289.7	30188.3	37286.2		14.4273	14.8389	15.2329	15.107	14.8817	15.1864		14.8331		-0.405701	0.00580356	0.399897	0.273909	0.0486501	0.353302
30187844	1	3092.03	3270.8	4233.28	5131.61	6601.42	6153.67		11.5943	11.6754	12.0476	12.3252	12.6886	12.5872		11.7724		-0.178105	-0.0970135	0.275118	0.552753	0.916119	0.814789
30187844	1	3708.93	4775.68	6118.68	6215.95	7077.16	6138.51		11.8568	12.2215	12.579	12.6018	12.789	12.5837		12.2191		-0.362308	0.00239578	0.359912	0.382667	0.569862	0.364578
30187844	1	3316.2	3362.26	5223.2	7524.58	6558.97	7909.02		11.6953	11.7152	12.3507	12.8774	12.6793	12.9493		11.9204		-0.2251	-0.205202	0.430302	0.956979	0.758836	1.02887
30187844	1	6228.58	9165.24	6785.45	7767.04	10765.3	7054.2		12.6047	13.162	12.7282	12.9231	13.3941	12.7843		12.8316		-0.226937	0.330332	-0.103395	0.0915242	0.562474	-0.0473576
30187844	1	4648.8	7007.77	6756.75	10795.7	8970	10690.1		12.1826	12.7747	12.7221	13.3982	13.1309	13.384		12.5598		-0.377189	0.214908	0.162281	0.838336	0.57106	0.824158
30187844	1	5666.54	8178.94	8679.98	15869.4	14440.1	12791.5		12.4683	12.9977	13.0835	13.954	13.8178	13.6429		12.8498		-0.381557	0.14789	0.233667	1.10415	0.967986	0.793089
30187844	1	16371.1	9347.75	11987.2	9544.05	17519.4	12187.5		13.9989	13.1904	13.5492	13.2204	14.0967	13.5731		13.5795		0.41937	-0.389089	-0.0302815	-0.359106	0.517176	-0.0063763
30187844	1	7715.07	12177.1	10968.1	18370.7	16576.4	17475.9		12.9135	13.5719	13.421	14.1651	14.0168	14.0931		13.3021		-0.388658	0.269758	0.118901	0.862995	0.714718	0.790959
30187844	1	15141	18401.3	20165.1	21488.3	22677.7	21847.5		13.8862	14.1675	14.2996	14.3913	14.469	14.4152		14.1178		-0.231586	0.0497665	0.181819	0.273511	0.351235	0.297425
30187844	1	11541.9	19589.2	17247.7	19254.8	22695.4	25245.7		13.4946	14.2578	14.0741	14.2329	14.4701	14.6238		13.9422		-0.447564	0.315611	0.131953	0.290768	0.527955	0.681593
30187844	1	11341.7	15292.6	15740.6	19554.4	19125.2	21722.3		13.4693	13.9005	13.9422	14.2552	14.2232	14.4069		13.7707		-0.30135	0.129844	0.171506	0.484509	0.452487	0.636194
30187844	1	14313.9	17624.9	16582.8	19521.1	24581.1	25160.1		13.8051	14.1053	14.0174	14.2527	14.5853	14.6188		13.976		-0.170822	0.129377	0.0414451	0.276795	0.609309	0.642897
30187844	1	11564.8	18107.5	17197.5	21341	26893.7	28473.7		13.4974	14.1443	14.0699	14.3813	14.715	14.7973		13.9039		-0.406439	0.240413	0.166026	0.47745	0.811092	0.893457
30187844	1	69913.5	89151.3	115089	107853	119357	115384		16.0933	16.444	16.8124	16.7187	16.8649	16.8161		16.4499		-0.356597	-0.00591199	0.362509	0.268829	0.415043	0.366206
30187844	1	56201.4	73759.3	76690.9	107164	104301	102989		15.7783	16.1705	16.2268	16.7095	16.6704	16.6521		16.0585		-0.280222	0.111996	0.168226	0.650923	0.611852	0.593587
30187869	1	5520.24	6353.36	6277.79	7599.82	6786.35	7706.72		12.4305	12.6333	12.616	12.8917	12.7284	12.9119		12.56		-0.129439	0.0733509	0.0560876	0.331797	0.168468	0.351948
30187898	1	19299.7	24468	26488.2	30225.1	32049.7	28097.5		14.2363	14.5786	14.6931	14.8835	14.968	14.7782		14.5027		-0.26636	0.0759534	0.190406	0.380807	0.465369	0.275499
30187925	1	2762.14	4520.99	4469.06	2377.8	3109.09	5799.98		11.4316	12.1424	12.1258	11.2154	11.6023	12.5018		11.8999		-0.468344	0.242505	0.22584	-0.684507	-0.297641	0.601915
30187925	1	5537.36	6181.26	6361.73	6109.44	7724.05	10421		12.435	12.5937	12.6352	12.5768	12.9151	13.3472		12.5546		-0.119641	0.0390612	0.0805796	0.0222001	0.360518	0.792584
30187925	1	6769.96	7022.21	7443.37	10442.5	11103.6	11903		12.7249	12.7777	12.8617	13.3502	13.4387	13.539		12.7881		-0.063195	-0.0104176	0.0736127	0.562048	0.650614	0.750912
30187925	1	5979.38	9527.75	9989.86	10376.1	13125.4	10789.7		12.5458	13.2179	13.2862	13.341	13.6801	13.3974		13.0166		-0.470869	0.20127	0.269598	0.324327	0.663427	0.380717
30187925	1	5513.81	10078	8773.11	11070.2	12779	11067.3		12.4288	13.2989	13.0989	13.4344	13.6415	13.434		12.9422		-0.513375	0.356712	0.156663	0.492187	0.699276	0.491804
30187925	1	7112.81	9469.25	7760.58	8415.12	10725.5	10184.6		12.7962	13.209	12.9219	13.0388	13.3888	13.3141		12.9757		-0.179526	0.233305	-0.0537796	0.0630383	0.413023	0.338377
30187925	1	6565.83	3533.36	7633.9	7301.8	8654.19	9416.58		12.6808	11.7868	12.8982	12.834	13.0792	13.201		12.4553		0.225498	-0.668438	0.442941	0.378774	0.62392	0.745724
30187925	1	9028.37	11071.6	14449.4	13960.4	17488.5	14570		13.1403	13.4346	13.8187	13.769	14.0941	13.8307		13.4645		-0.324265	-0.0299365	0.354202	0.304534	0.629599	0.366197
30187925	1	8615.38	12805.7	14574.9	14485.1	16771.7	13588		13.0727	13.6445	13.8312	13.8223	14.0337	13.73		13.5161		-0.443433	0.128369	0.315064	0.306149	0.517611	0.213912
30187925	1	13260.8	12970.8	15914	16187	23210.6	19718.2		13.6949	13.663	13.958	13.9825	14.5025	14.2672		13.772		-0.0770791	-0.108974	0.186053	0.210588	0.730538	0.495281
30187925	1	24927.6	26029.3	30162.3	31652.1	27877.5	33163.9		14.6055	14.6678	14.8805	14.95	14.7668	15.0173		14.7179		-0.112462	-0.0500741	0.162536	0.232095	0.0488955	0.299407
30187925	1	30781.1	28714.6	42705.7	43659.6	40196.6	45601.7		14.9098	14.8095	15.3821	15.414	15.2948	15.4768		15.0338		-0.124041	-0.224301	0.348342	0.380214	0.260986	0.443001
30187925	1	33620.4	33283.1	32419.9	43868.9	57743.6	43711.6		15.037	15.0225	14.9846	15.4209	15.8174	15.4157		15.0147		0.0223349	0.00778796	-0.0301229	0.406199	0.802662	0.401014
30187925	1	184404	166702	179141	192928	222190	242088		17.4925	17.3469	17.4507	17.5577	17.7614	17.8852		17.4301		0.0624584	-0.083142	0.0206836	0.127652	0.331382	0.455122
30187961	1	1743.08	2234.35	2492.42	2136.38	1325.02	1456.21		10.7674	11.1256	11.2833	11.061	10.3718	10.508		11.0588		-0.291371	0.0668395	0.224531	0.00215604	-0.687	-0.550794
30187961	1	1222.48	2556.06	2023.16	1464.38	1455.36	1331.61		10.2556	11.3197	10.9824	10.5161	10.5072	10.379		10.8526		-0.596968	0.467141	0.129827	-0.336489	-0.345408	-0.473609
30187961	1	811.822	2276.56	2674.51	1714.18	2612.69	2784.38		9.66502	11.1526	11.3851	10.7433	11.3513	11.4431		10.7342		-1.06922	0.418401	0.650819	0.00906498	0.617081	0.708902
30187961	1	658.002	3106.92	4004.28	2957.62	2219.2	3624.31		9.36195	11.6013	11.9673	11.5302	11.1158	11.8235		10.9768		-1.6149	0.624421	0.990478	0.553375	0.138977	0.846645
30187961	1	2150.44	2036.88	2389.59	2472.2	3643.24	3231.18		11.0704	10.9921	11.2225	11.2716	11.831	11.6578		11.095		-0.0246186	-0.102891	0.127509	0.176545	0.73597	0.562809
30187961	1	4079.25	3761.79	6675.17	4980.18	4834.88	6126.03		11.9941	11.8772	12.7046	12.282	12.2393	12.5807		12.192		-0.197872	-0.314758	0.51263	0.0900229	0.0473057	0.388776
30187961	1	3634.09	5894.44	5488.52	6624.77	6777.06	5543.05		11.8274	12.5251	12.4222	12.6937	12.7264	12.4365		12.2582		-0.430861	0.266899	0.163962	0.435415	0.468204	0.178224
30187961	1	4446.25	5232.07	7917.1	5757.75	7123.57	5698.22		12.1184	12.3532	12.9508	12.4913	12.7984	12.4763		12.4741		-0.355726	-0.120932	0.476658	0.0171912	0.324286	0.00219589
30187961	1	4578.7	3886.23	5464.93	3743.35	4165.73	5307.54		12.1607	11.9242	12.416	11.8701	12.0244	12.3738		12.167		-0.00623299	-0.242799	0.249032	-0.296841	-0.1426	0.206874
30187961	1	2959.31	6602.87	8430.39	6670.49	7301.07	7908.03		11.531	12.6889	13.0414	12.7036	12.8339	12.9491		12.4204		-0.889392	0.268443	0.620949	0.283142	0.413457	0.528668
30187961	1	2719.82	7597.36	10386.1	5912.26	11405.5	7004.26		11.4093	12.8913	13.3424	12.5295	13.4774	12.774		12.5476		-1.13835	0.343637	0.794714	-0.018152	0.929791	0.226372
30187961	1	2207.99	3266.24	8106.55	6648.33	6662.37	6273.16		11.1085	11.6734	12.9849	12.6988	12.7018	12.615		11.9223		-0.813749	-0.248853	1.0626	0.776506	0.779549	0.692706
30187961	1	4857.65	7019.94	7507.51	7477.49	9308.17	9273.93		12.246	12.7772	12.8741	12.8683	13.1843	13.179		12.6325		-0.386426	0.144775	0.241651	0.23587	0.551814	0.546497
30187961	1	5676.52	6585.47	6945.32	8521.79	10299	9474.9		12.4708	12.6851	12.7618	13.0569	13.3302	13.2099		12.6392		-0.168438	0.0458414	0.122596	0.417712	0.690994	0.570665
30187961	1	5422.93	7069.21	9031.48	7861.98	7986.24	7599.78		12.4049	12.7873	13.1407	12.9407	12.9633	12.8917		12.7776		-0.37279	0.00968751	0.363102	0.163032	0.185656	0.114098
30187961	1	3821.47	9825.45	9303.61	6944.25	11966.4	8513.65		11.8999	13.2623	13.1836	12.7616	13.5467	13.0556		12.7819		-0.88202	0.480376	0.401644	-0.0203292	0.764766	0.273631
30187961	1	9312.2	9918.75	11320.9	10920.1	12812.4	11412.3		13.1849	13.2759	13.4667	13.4147	13.6453	13.4783		13.3092		-0.124276	-0.0332395	0.157515	0.105517	0.336074	0.169117
30187961	1	9695.42	14681.5	21015.2	17818.1	23359.7	12773.7		13.2431	13.8417	14.3591	14.1211	14.5117	13.6409		13.8146		-0.571562	0.0270646	0.544497	0.306409	0.697086	-0.173757
30187961	1	10320.8	13829.3	13842.7	14580.3	15411.6	15389		13.3333	13.7554	13.7568	13.8317	13.9117	13.9096		13.6152		-0.281916	0.140259	0.141657	0.216554	0.296547	0.294426
30187961	1	7500.73	14647.3	15610.6	15832.6	15253.8	14074.6		12.8728	13.8383	13.9302	13.9506	13.8969	13.7808		13.5471		-0.674319	0.291211	0.383108	0.403476	0.349746	0.233667
30187961	1	10280.1	14883.9	14733.8	15730.3	16181.8	14680.7		13.3276	13.8615	13.8468	13.9413	13.9821	13.8416		13.6786		-0.351058	0.182839	0.168219	0.262635	0.303457	0.16301
30187961	1	6845.95	10998.4	14239.3	14632.7	15438.4	15877		12.741	13.425	13.7976	13.8369	13.9142	13.9546		13.3212		-0.580174	0.103792	0.476381	0.515697	0.593027	0.63344
30187961	1	13068.5	22597	22950.5	16897	24117.7	19165.7		13.6738	14.4638	14.4862	14.0445	14.5578	14.2262		14.208		-0.534153	0.255881	0.278272	-0.163486	0.349839	0.018275
30187961	1	10744.9	19462.8	25055.9	18210.3	24395.5	19256.4		13.3914	14.2484	14.6129	14.1525	14.5743	14.2331		14.0842		-0.692854	0.164212	0.528642	0.068248	0.490105	0.148828
30187961	1	22028.1	31349.4	49343.9	37822.9	49192	40381.4		14.4271	14.9361	15.5906	15.207	15.5861	15.3014		14.9846		-0.557542	-0.0484468	0.605988	0.222376	0.601541	0.316806
30187961	1	28193.3	60878.2	67036.8	49991.1	74734.1	47507		14.7831	15.8936	16.0327	15.6094	16.1895	15.5359		15.5698		-0.786725	0.323848	0.462877	0.0395934	0.619691	-0.0339359
30187972	1	2428.94	1781.5	3975.22	4340.18	4899.51	4541.33		11.2461	10.7989	11.9568	12.0835	12.2584	12.1489		11.3339		-0.0878241	-0.535057	0.622881	0.7496	0.924484	0.81496
30187972	1	4585.1	3652.31	5920.75	3570.08	5106.8	3426.23		12.1627	11.8346	12.5316	11.8017	12.3182	11.7424		12.1763		-0.0135605	-0.341705	0.355266	-0.374557	0.141905	-0.433892
30187972	1	3676.82	5117.95	8441.39	6373.88	12039.4	8255.3		11.8442	12.3214	13.0433	12.638	13.5555	13.0111		12.403		-0.55871	-0.0816022	0.640312	0.235003	1.15253	0.608151
30187972	1	5286.89	5853.3	11245.3	5978.76	10572	7455.51		12.3682	12.515	13.457	12.5456	13.368	12.8641		12.7801		-0.411885	-0.265055	0.67694	-0.234459	0.58787	0.0840012
30187972	1	8378.96	6587.11	7941.42	4666.31	11415.2	6751.71		13.0326	12.6854	12.9552	12.1881	13.4787	12.721		12.8911		0.141499	-0.205626	0.0641262	-0.702991	0.587615	-0.170018
30187972	1	14104.9	14570.4	18293.6	14241.1	19932.7	19295.9		13.7839	13.8307	14.1591	13.7978	14.2828	14.236		13.9246		-0.140661	-0.093822	0.234483	-0.1268	0.358278	0.311439
30187972	1	13455.6	15523.5	17075.6	13273.7	24556.3	17939		13.7159	13.9222	14.0596	13.6963	14.5838	14.1308		13.8992		-0.183327	0.0229225	0.160405	-0.202958	0.684563	0.231571
30187972	1	10581.3	10778.4	10519.7	11628.1	25797.7	11750.4		13.3692	13.3959	13.3608	13.5053	14.655	13.5204		13.3753		-0.00606956	0.0205629	-0.0144934	0.130033	1.27966	0.145132
30187972	1	11414.1	11175.6	12282.2	13479	16618.3	16593		13.4785	13.4481	13.5843	13.7184	14.0205	14.0183		13.5036		-0.0250987	-0.0555576	0.0806563	0.214802	0.516863	0.514662
30187972	1	11133.4	13077.8	16316.3	13000.7	20780.4	15164.1		13.4426	13.6748	13.994	13.6663	14.3429	13.8884		13.7038		-0.261218	-0.0289894	0.290207	-0.0375176	0.639116	0.18455
30187972	1	6929.88	9716.91	13094.6	13072.4	19051.3	14337.4		12.7586	13.2463	13.6767	13.6742	14.2176	13.8075		13.2272		-0.468578	0.0190893	0.449489	0.447044	0.990407	0.580303
30187972	1	9284.88	10903.8	10676.2	13577.7	14899.3	13080.1		13.1807	13.4125	13.3821	13.729	13.863	13.6751		13.3251		-0.144441	0.0874322	0.0570087	0.403843	0.537846	0.349978
30187972	1	13102.4	12854.5	17784.6	15621.8	27837	15590.8		13.6775	13.65	14.1183	13.9313	14.7647	13.9284		13.8153		-0.137748	-0.165302	0.30305	0.115982	0.94943	0.113124
30187972	1	17398.8	18377.7	23542	21091.3	27829.4	23848.7		14.0867	14.1657	14.523	14.3644	14.7643	14.5416		14.2584		-0.17174	-0.0927729	0.264513	0.105922	0.505887	0.283188
30187972	1	14989.4	16077.1	18412.3	16924.4	35257.9	19547.1		13.8717	13.9727	14.1684	14.0468	15.1057	14.2547		14.0043		-0.132601	-0.0315297	0.164131	0.042561	1.10141	0.250418
30187972	1	11293.8	14688.9	18524.3	15757.3	24008.1	15606.1		13.4632	13.8424	14.1771	13.9437	14.5512	13.9298		13.8276		-0.364362	0.0148323	0.349529	0.11613	0.723632	0.102217
30187972	1	16894	16965.9	23315.6	23333.4	36297.5	26942.8		14.0442	14.0504	14.509	14.5101	15.1476	14.7176		14.2012		-0.156973	-0.15084	0.307813	0.308916	0.946388	0.516416
30187972	1	23218.6	21753.7	35805.7	23433.7	40804	24760.1		14.503	14.409	15.1279	14.5163	15.3164	14.5957		14.68		-0.176962	-0.270982	0.447945	-0.163662	0.636467	-0.0842296
30187972	1	38776.1	25575	32462.6	28773.5	50953.5	29924.5		15.2429	14.6424	14.9865	14.8125	15.6369	14.869		14.9573		0.285607	-0.314826	0.0292186	-0.144821	0.67962	-0.088235
30187972	1	42333.3	49119.5	58095.9	61882.9	68796.6	49882.2		15.3695	15.584	15.8261	15.9173	16.07	15.6062		15.5932		-0.223714	-0.0092134	0.232928	0.324032	0.476829	0.0130173
30187972	1	52289.2	68853.6	96032.2	82286.1	118748	74015.9		15.6742	16.0712	16.5512	16.3284	16.8575	16.1755		16.0989		-0.424675	-0.0276547	0.45233	0.229462	0.75864	0.0766476
30187972	1	200710	134848	209562	185715	296152	210502		17.6148	17.041	17.677	17.5027	18.176	17.6835		17.4442		0.170504	-0.403275	0.232772	0.0584852	0.731731	0.239231
30187977	1	1708.21	1902.48	2135.97	1526.28	2293.65	3253.08		10.7383	10.8937	11.0607	10.5758	11.1634	11.6676		10.8975		-0.159269	-0.00386877	0.163138	-0.321732	0.265892	0.770052
30187977	1	2957.34	2196.56	2619.39	2550.26	2855.81	4100.4		11.5301	11.101	11.355	11.3164	11.4797	12.0015		11.3287		0.201375	-0.227682	0.026307	-0.0122839	0.150975	0.672837
30187977	1	2799.83	2202.37	2882.62	1788.53	2919.34	2821.68		11.4511	11.1048	11.4932	10.8046	11.5114	11.4623		11.3497		0.101414	-0.244871	0.143457	-0.545152	0.161715	0.112629
30187977	1	2796.96	3593.29	4341.37	2729.04	3645.52	5052.56		11.4496	11.8111	12.0839	11.4142	11.8319	12.3028		11.7816		-0.331911	0.0295325	0.302379	-0.367376	0.0503518	0.521243
30187977	1	4475.51	5018.7	6169.94	6249.15	5618.6	6544.93		12.1278	12.2931	12.591	12.6094	12.456	12.6762		12.3373		-0.209488	-0.0442284	0.253716	0.27212	0.11867	0.338836
30187977	1	7862.99	8186.08	7144.8	10923.5	8798.2	11925.7		12.9409	12.999	12.8027	13.4151	13.103	13.5418		12.9142		0.0266968	0.0847907	-0.111488	0.500978	0.188827	0.627621
30187977	1	9141.08	8737.85	14377.6	14657.5	11795.4	24337.8		13.1581	13.0931	13.8115	13.8394	13.5259	14.5709		13.3542		-0.196098	-0.261185	0.457283	0.485105	0.171684	1.21666
30187977	1	16214.6	14624.6	21715.4	21406.7	19853.1	24246.9		13.985	13.8361	14.4064	14.3858	14.2771	14.5655		14.0758		-0.0908439	-0.239741	0.330585	0.309926	0.201231	0.489667
30187977	1	49657.7	42940.4	61824.6	49535.8	53027.2	58729.4		15.5997	15.39	15.9159	15.5962	15.6944	15.8418		15.6352		-0.0354932	-0.245176	0.280669	-0.0390407	0.059222	0.206571
30187977	1	47209.8	45069.7	60730.5	50150.3	49364.6	68528.9		15.5268	15.4599	15.8901	15.614	15.5912	16.0644		15.6256		-0.0988023	-0.165731	0.264534	-0.01163	-0.0344127	0.438824
30187977	1	40822.7	52663	72463.1	73754.7	72989.5	82221.1		15.3171	15.6845	16.145	16.1704	16.1554	16.3272		15.7155		-0.398431	-0.031012	0.429443	0.454932	0.439886	0.611707
30187977	1	46273.6	52344	80504	65554.1	58013.1	88469		15.4979	15.6757	16.2968	16.0004	15.8241	16.4329		15.8235		-0.325569	-0.147734	0.473303	0.176928	0.000621018	0.609414
30187977	1	155372	151723	243849	196675	177917	275003		17.2454	17.2111	17.8956	17.5855	17.4408	18.0691		17.4507		-0.205324	-0.239614	0.444938	0.134764	-0.00984546	0.618398
30188046	1	9971.65	16254.2	18664.3	19139.3	23650	22959.9		13.2836	13.9885	14.188	14.2243	14.5296	14.4868		13.82		-0.536427	0.168479	0.367947	0.40421	0.709509	0.666783
30188046	1	13592.4	18132.9	16413.6	16345.2	25147.1	14889.2		13.7305	14.1463	14.0026	13.9966	14.6181	13.862		13.9598		-0.2293	0.186507	0.0427925	0.0367701	0.658291	-0.0978388
30188046	1	14468.3	16646.1	22712.2	18298.4	20699.5	20369.9		13.8206	14.0229	14.4712	14.1594	14.3373	14.3141		14.1049		-0.284287	-0.0819984	0.366285	0.0545313	0.232413	0.209253
30188046	1	12763.2	16332.2	18805.6	16830	25753.8	21063.4		13.6397	13.9954	14.1989	14.0387	14.6525	14.3624		13.9447		-0.304969	0.0507622	0.254207	0.0940832	0.707832	0.417781
30188046	1	41560.4	36083.7	30250.2	34745.5	46327.7	33292.7		15.3429	15.1391	14.8847	15.0845	15.4996	15.0229		15.1222		0.220709	0.0168457	-0.237555	-0.0376761	0.377374	-0.099294
30188046	1	317223	379270	326297	405617	553278	357302		18.2751	18.5329	18.3158	18.6298	19.0776	18.4468		18.3746		-0.0994706	0.158255	-0.0587843	0.255148	0.703035	0.0721756
30188049	1	2216.14	3066.03	3804.13	3728.71	3454.42	4236.95		11.1138	11.5822	11.8934	11.8645	11.7542	12.0488		11.5298		-0.415947	0.0523763	0.363571	0.334681	0.224445	0.51903
30188078	1	77240.3	64596.6	80242.6	65941.4	93087.2	90035.9		16.2371	15.9792	16.2921	16.0089	16.5063	16.4582		16.1694		0.0676262	-0.190268	0.122642	-0.160543	0.336855	0.288773
30188092	1	6240.43	7634.92	10042.1	8408.6	8236.19	9834.79		12.6074	12.8984	13.2938	13.0376	13.0078	13.2637		12.9332		-0.325773	-0.0348054	0.360579	0.104448	0.0745599	0.330477
30188120	1	2380.35	1695.25	2997.03	2885.29	1813.12	2928.01		11.217	10.7273	11.5493	11.4945	10.8243	11.5157		11.1645		0.0524378	-0.437239	0.384801	0.32998	-0.340263	0.351186
30188121	1	7036.71	8216.03	12445.4	13738.4	13626.8	12947.1		12.7807	13.0042	13.6033	13.7459	13.7342	13.6603		13.1294		-0.348728	-0.125187	0.473916	0.616509	0.604746	0.530926
30188121	1	13541.7	12011.7	16763.4	18640.8	16335.9	21015.6		13.7251	13.5522	14.033	14.1862	13.9958	14.3592		13.7701		-0.0449784	-0.217945	0.262923	0.416079	0.225663	0.589071
30188121	1	14347.7	14881.4	18603.7	15717.2	18254.5	17981.8		13.8085	13.8612	14.1833	13.9401	14.156	14.1342		13.951		-0.142485	-0.0897963	0.232282	-0.0109671	0.204944	0.183227
30188121	1	18139.6	22852.5	23317.6	34265.8	31005.9	25115.4		14.1469	14.4801	14.5091	15.0645	14.9203	14.6163		14.3787		-0.231827	0.101378	0.130449	0.685796	0.54157	0.237602
30188121	1	49586.4	58753.8	94604.7	107932	95473.4	127311		15.5977	15.8424	16.5296	16.7198	16.5428	16.958		15.9899		-0.392234	-0.147498	0.539733	0.729865	0.552919	0.968109
30188130	1	32666.6	33410.1	42387	37781.8	38804.1	47538.8		14.9955	15.028	15.3713	15.2054	15.2439	15.5368		15.1316		-0.136092	-0.103624	0.239716	0.073785	0.112304	0.4052
30188202	1	920.715	1365.53	1661.31	2179.27	1430.81	2354.33		9.84661	10.4152	10.6981	11.0896	10.4826	11.2011		10.32		-0.473375	0.095257	0.378118	0.769643	0.162631	0.881113
30188202	1	2514.07	3007.42	3082.31	3995.76	2189.71	3540.01		11.2958	11.5543	11.5898	11.9643	11.0965	11.7895		11.48		-0.184161	0.074339	0.109822	0.484284	-0.38345	0.309565
30188202	1	5860.38	5977.95	10084.7	7386.05	7691.95	6975.74		12.5168	12.5454	13.2999	12.8506	12.9091	12.7681		12.7874		-0.270586	-0.241931	0.512517	0.0632223	0.121768	-0.0192361
30188202	1	5295.7	8382.8	5433.99	5919.52	10885.3	12879.2		12.3706	13.0332	12.4078	12.5313	13.4101	13.6528		12.6039		-0.233266	0.429343	-0.196077	-0.0726084	0.806219	1.04888
30188202	1	14786.8	13964.5	16234	14119.8	19490.8	10841.7		13.852	13.7695	13.9867	13.7854	14.2505	13.4043		13.8694		-0.0173894	-0.0999311	0.11732	-0.0839744	0.381097	-0.4651
30188202	1	14223.3	17351.5	17590.9	15609.7	28619.2	14880.9		13.796	14.0828	14.1025	13.9302	14.8047	13.8612		13.9938		-0.197793	0.0890124	0.10878	-0.0636078	0.810936	-0.132587
30188202	1	58744.5	53795.3	97970.5	68757.1	106771	55595.4		15.8422	15.7152	16.5801	16.0692	16.7042	15.7627		16.0458		-0.203641	-0.330614	0.534254	0.0234148	0.658351	-0.283128
30188202	1	66565.6	69587.4	85972.3	68869.2	89537	66795.8		16.0225	16.0865	16.3916	16.0716	16.4502	16.0275		16.1669		-0.144382	-0.0803318	0.224713	-0.0952999	0.283326	-0.139402
30188202	1	122833	154691	223317	147860	208796	160182		16.9063	17.239	17.7687	17.1739	17.6717	17.2894		17.3047		-0.398362	-0.0656691	0.464031	-0.130829	0.367034	-0.0153471
30188232	1	1072.79	555.977	861.644	192.762	2581.93	1920.02		10.0671	9.11888	9.75095	7.59067	11.3342	10.9069		9.64566		0.421489	-0.526777	0.105289	-2.05499	1.68857	1.26124
30188232	1	1405.67	2261.29	2024.89	3147.6	2609.75	3100.43		10.457	11.1429	10.9836	11.62	11.3497	11.5983		10.8612		-0.404162	0.281732	0.12243	0.758834	0.488498	0.737053
30188232	1	2153.04	1144.38	1417.81	1634.04	2179.43	3669.89		11.0722	10.1604	10.4694	10.6742	11.0897	11.8415		10.5673		0.504838	-0.406968	-0.0978702	0.106907	0.522416	1.2742
30188232	1	2265.17	3372.87	4532.24	3459.6	4747.73	5115.93		11.1454	11.7198	12.146	11.7564	12.213	12.3208		11.6704		-0.524988	0.0493698	0.475618	0.0859997	0.542629	0.650388
30188232	1	2960.65	3733.22	5096.36	3093.13	4033.55	4558.75		11.5317	11.8662	12.3153	11.5949	11.9778	12.1544		11.9044		-0.372686	-0.0381797	0.410866	-0.309531	0.0734496	0.250039
30188232	1	3448.42	7018.71	6800.5	5603.11	7061.21	7044.33		11.7517	12.777	12.7314	12.452	12.7857	12.7822		12.42		-0.668326	0.356945	0.311381	0.0319675	0.365654	0.362202
30188232	1	5279.69	7156.23	6465.87	6035.13	5038.74	8002.79		12.3662	12.805	12.6586	12.5592	12.2988	12.9663		12.6099		-0.243713	0.195035	0.0486785	-0.0507805	-0.311103	0.356338
30188232	1	7531.63	4940.82	7626.37	7722.77	5476.12	7361.02		12.8787	12.2705	12.8968	12.9149	12.4189	12.8457		12.682		0.196726	-0.411486	0.21476	0.232882	-0.263083	0.163668
30188232	1	4260.3	5124.32	6028.15	6790.76	6500.87	6668.95		12.0567	12.3231	12.5575	12.7294	12.6664	12.7032		12.3125		-0.255723	0.0106845	0.245038	0.416897	0.353957	0.390783
30188238	1	39915.1	39694.7	51215.9	51365.5	64025.9	64589.9		15.2846	15.2767	15.6443	15.6485	15.9664	15.979		15.4019		-0.117222	-0.125212	0.242434	0.246642	0.564497	0.57715
30188253	1	10202.6	9480.28	17677.3	16127.7	14476.9	15442		13.3166	13.2107	14.1096	13.9773	13.8215	13.9146		13.5457		-0.229009	-0.334942	0.563951	0.431601	0.275811	0.368914
30188253	1	13572.4	11694	15490.2	12925.6	15095.3	16967		13.7284	13.5135	13.9191	13.6579	13.8818	14.0504		13.7203		0.00808122	-0.206834	0.198752	-0.06237	0.161504	0.330132
30188253	1	24230.3	19919.3	28001.7	24865.2	21695.7	22503.8		14.5645	14.2819	14.7732	14.6018	14.4051	14.4579		14.5399		0.0246485	-0.257999	0.233351	0.061963	-0.134753	-0.0819997
30188253	1	37333.5	14369.2	30734	23281.1	29063.9	31485.1		15.1882	13.8107	14.9075	14.5069	14.8269	14.9424		14.6355		0.552706	-0.82478	0.272074	-0.128604	0.191466	0.306908
30188253	1	70724.9	49040.9	112243	82912.3	93093.9	88790.6		16.1099	15.5817	16.7763	16.3393	16.5064	16.4381		16.156		-0.0460331	-0.574266	0.620299	0.183334	0.350434	0.282155
30188258	1	79802.5	120838	125651	158565	160031	139955		16.2841	16.8827	16.9391	17.2747	17.288	17.0946		16.702		-0.417829	0.180743	0.237086	0.572738	0.586019	0.392627
30188258	1	112652	217014	189293	278052	231147	286819		16.7815	17.7274	17.5303	18.085	17.8185	18.1298		17.3464		-0.564888	0.381028	0.18386	0.738592	0.47205	0.783377
30188258	1	274625	464064	342995	540265	504081	526264		18.0671	18.824	18.3878	19.0433	18.9433	19.0054		18.4263		-0.359195	0.397667	-0.0384713	0.61701	0.516998	0.57913
30188272	1	5139.37	4465.5	5609.29	5485.96	7020.57	7834.56		12.3274	12.1246	12.4536	12.4215	12.7774	12.9356		12.3019		0.0255145	-0.177256	0.151741	0.119666	0.475511	0.633774
30188272	1	5330.09	6092.41	7154.04	7128.48	6892.37	7140.22		12.3799	12.5728	12.8045	12.7994	12.7508	12.8018		12.5858		-0.205816	-0.0129643	0.218781	0.213617	0.165024	0.215992
30188272	1	3251.49	3831.33	4793.77	3776.41	5002.53	6014.3		11.6669	11.9036	12.2269	11.8828	12.2884	12.5542		11.9325		-0.265602	-0.0288568	0.294459	-0.049688	0.355957	0.621695
30188272	1	6571.93	6393.55	9557.55	7950.63	7599.06	9362.39		12.6821	12.6424	13.2224	12.9569	12.8916	13.1927		12.849		-0.166874	-0.206576	0.37345	0.107877	0.04263	0.343685
30188272	1	3531.69	7242.41	7919.42	9060.3	7745.68	11091		11.7861	12.8223	12.9512	13.1453	12.9192	13.4371		12.5199		-0.733716	0.302395	0.431321	0.625484	0.399317	0.917241
30188272	1	7066.3	8111.75	8313.27	9923.06	11579.7	10196		12.7867	12.9858	13.0212	13.2766	13.4993	13.3157		12.9312		-0.144507	0.0545528	0.0899542	0.345324	0.568067	0.384471
30188272	1	11946.4	13467.6	12824.3	16187.5	15485.3	17863.2		13.5443	13.7172	13.6466	13.9826	13.9186	14.1247		13.636		-0.0917458	0.081179	0.0105668	0.346561	0.282581	0.488671
30188272	1	6988.97	12979.1	18365.2	20630.3	15814.6	17211		12.7709	13.6639	14.1647	14.3325	13.949	14.071		13.5332		-0.762287	0.130753	0.631534	0.799326	0.415814	0.537892
30188272	1	9009.08	15062.8	17252.7	18906.7	17014.8	24137.4		13.1372	13.8787	14.0745	14.2066	14.0545	14.559		13.6968		-0.559636	0.1819	0.377736	0.509807	0.357701	0.862185
30188272	1	14459.8	17910.2	28234	31920	25541.9	28534.5		13.8198	14.1285	14.7851	14.9622	14.6406	14.8004		14.2445		-0.424705	-0.115973	0.540678	0.717705	0.396111	0.555951
30188272	1	23374.3	29691.9	29770.9	32610.1	37817.5	26169.6		14.5126	14.8578	14.8616	14.993	15.2068	14.6756		14.744		-0.231376	0.113772	0.117603	0.24902	0.462758	-0.0684058
30188272	1	13017.5	20509.5	33193.7	34043.2	26715.5	36515.6		13.6682	14.324	15.0186	15.0551	14.7054	15.1562		14.3369		-0.668766	-0.0129249	0.681691	0.718148	0.368459	0.819295
30188272	1	42109.6	42593.3	44313.5	60208.8	59159.6	61030.5		15.3619	15.3783	15.4355	15.8777	15.8523	15.8972		15.3919		-0.0300237	-0.0135481	0.0435718	0.4858	0.460438	0.505357
30188287	1	6323.85	4861.73	7473.33	6102.41	8444.51	7329.97		12.6266	12.2473	12.8675	12.5752	13.0438	12.8396		12.5805		0.0461286	-0.333205	0.287077	-0.00529664	0.463339	0.259132
30188287	1	15984.9	14608.7	13149.6	21539.9	41106.9	8147.68		13.9644	13.8345	13.6827	14.3947	15.3271	12.9922		13.8272		0.137189	0.00731181	-0.144501	0.567496	1.49986	-0.835057
30188287	1	5456.66	2724.37	4264.64	3905.09	6852.97	4919.54		12.4138	11.4117	12.0582	11.9311	12.7425	12.2643		11.9612		0.452564	-0.549532	0.0969689	-0.0300974	0.781275	0.303069
30188287	1	7572.44	14042.9	10535.8	12610.5	22247	6500.19		12.8865	13.7776	13.363	13.6223	14.4413	12.6663		13.3424		-0.455827	0.435183	0.0206431	0.279965	1.09895	-0.676102
30188287	1	7899.66	5670.69	8119.91	6951.11	9872.18	10992.7		12.9476	12.4693	12.9872	12.763	13.2692	13.4243		12.8014		0.146198	-0.332069	0.185872	-0.0383496	0.467776	0.622877
30188287	1	30666.7	21973.8	38943.4	31939.4	37350.4	42337		14.9044	14.4235	15.2491	14.9631	15.1888	15.3696		14.859		0.0453944	-0.435495	0.390101	0.104059	0.329846	0.510639
30188344	1	66592.8	46999.8	69705.9	36683.2	68477.5	86978.8		16.0231	15.5204	16.089	15.1628	16.0633	16.4084		15.8775		0.145598	-0.357112	0.211514	-0.714648	0.185863	0.530897
30188370	1	10653.6	9479.94	12252.3	9954.7	16396.5	14130.4		13.3791	13.2107	13.5808	13.2812	14.0011	13.7865		13.3902		-0.0111048	-0.179498	0.190603	-0.108999	0.610936	0.396359
30188370	1	9974.34	6582.05	9728.68	9891.48	11560.2	12175.1		13.284	12.6843	13.248	13.272	13.4969	13.5717		13.0721		0.211887	-0.387797	0.17591	0.199851	0.42476	0.499533
30188370	1	13791.5	10004.2	14150.9	14865.7	15026	14999.1		13.7515	13.2883	13.7886	13.8597	13.8752	13.8726		13.6095		0.142018	-0.321149	0.17913	0.250226	0.265704	0.26312
30188370	1	20272.7	13010.8	17719.7	15171.9	22161.9	16912.3		14.3073	13.6674	14.1131	13.8891	14.4358	14.0458		14.0292		0.278009	-0.361827	0.0838187	-0.140136	0.406546	0.0165412
30188370	1	22126.9	17298.7	23387	20801.6	30302.6	25920.9		14.4335	14.0784	14.5134	14.3444	14.8872	14.6618		14.3418		0.0917444	-0.263392	0.171648	0.00263596	0.545383	0.320054
30188370	1	31166.3	28966.8	38835.2	35065.6	42442.7	37671.8		14.9277	14.8221	15.2451	15.0978	15.3732	15.2012		14.9983		-0.0705976	-0.176185	0.246782	0.0994728	0.374932	0.202903
30188379	1	16068.1	15100.3	21868.3	18539.4	22667.6	22162.4		13.9719	13.8823	14.4166	14.1783	14.4683	14.4358		14.0903		-0.118338	-0.207962	0.3263	0.0880575	0.378089	0.345573
30188401	1	26107.4	28665.2	24616.9	29931.7	38750	21602		14.6722	14.807	14.5874	14.8694	15.2419	14.3989		14.6888		-0.0166764	0.118165	-0.101488	0.180539	0.55306	-0.289971
30188401	1	28215.1	31947.3	34575.8	32307.1	44514.4	33159.4		14.7842	14.9634	15.0775	14.9796	15.442	15.0171		14.9417		-0.157508	0.0217187	0.135789	0.0378775	0.500296	0.0754427
30188401	1	35452.7	29918.6	39136.3	36037.2	41908.7	42970.8		15.1136	14.8688	15.2562	15.1372	15.355	15.3911		15.0795		0.0340823	-0.210774	0.176692	0.0576712	0.275434	0.311542
30188408	1	1121.53	1392.95	1318.64	1349.81	1081.11	447.623		10.1312	10.4439	10.3648	10.3985	10.0783	8.80614		10.3133		-0.18209	0.130589	0.0515009	0.0852038	-0.235038	-1.5072
30188408	1	1696.67	1049.6	2827.58	1815.54	3203.99	2637.9		10.7285	10.0356	11.4653	10.8262	11.6457	11.3652		10.7432		-0.0146685	-0.707526	0.722194	0.0830264	0.902499	0.622019
30188408	1	1276.14	1407.49	3143.64	2255.75	2773.16	2811.71		10.3176	10.4589	11.6182	11.1394	11.4373	11.4572		10.7982		-0.480666	-0.339321	0.819987	0.34116	0.639083	0.659
30188408	1	3105.39	4012.5	6870.57	3839.91	5453.13	5497.8		11.6006	11.9703	12.7462	11.9069	12.4129	12.4246		12.1057		-0.505126	-0.135401	0.640528	-0.19883	0.307184	0.318953
30188408	1	2909.52	4100.79	6292.77	8173.18	7258.34	8878.05		11.5066	12.0017	12.6195	12.9967	12.8254	13.116		12.0426		-0.536013	-0.0408903	0.576903	0.954107	0.782847	1.07345
30188408	1	4067.59	6666.24	7008.91	8591.61	8185.29	5618.3		11.99	12.7027	12.775	13.0687	12.9988	12.4559		12.4892		-0.499237	0.21346	0.285777	0.579515	0.50962	-0.0332793
30188408	1	6206.57	7747.79	9237.74	6802.94	11054.4	8577.29		12.5996	12.9196	13.1733	12.7319	13.4323	13.0663		12.8975		-0.297911	0.022078	0.275833	-0.165549	0.534842	0.168815
30188408	1	5572.08	5073.69	6517.37	5578.66	6557.11	8538.8		12.444	12.3088	12.6701	12.4457	12.6788	13.0598		12.4743		-0.0302975	-0.165479	0.195777	-0.0285955	0.204546	0.585519
30188408	1	3637.85	9731.17	8777	9385.31	7419.73	14804.9		11.8289	13.2484	13.0995	13.1962	12.8572	13.8538		12.7256		-0.896724	0.522805	0.373919	0.470595	0.131558	1.1282
30188408	1	28989.5	25324.4	41308.4	34586.6	42543.5	32338.9		14.8232	14.6282	15.3341	15.0779	15.3766	14.981		14.9285		-0.105302	-0.300303	0.405604	0.149382	0.448108	0.0524389
30188430	1	10920.2	11211	15167.2	13610.6	19763.6	14048.7		13.4147	13.4526	13.8887	13.7324	14.2706	13.7782		13.5853		-0.170617	-0.132713	0.30333	0.147112	0.685222	0.192819
30188430	1	16784.7	25790.2	25248.8	28777.5	34304.8	20503.5		14.0349	14.6545	14.6239	14.8127	15.0661	14.3236		14.4378		-0.402914	0.216762	0.186152	0.374881	0.628349	-0.114192
30188430	1	15167	23542.7	25659.8	25559.6	43334.3	28620.4		13.8887	14.523	14.6472	14.6416	15.4032	14.8048		14.353		-0.464304	0.170036	0.294267	0.288624	1.05027	0.451801
30188430	1	23410.6	29584	33896.3	32479.8	37232.9	32876.2		14.5149	14.8525	15.0488	14.9873	15.1843	15.0048		14.8054		-0.290542	0.047116	0.243426	0.181841	0.378876	0.199342
30188430	1	27857.1	27062.1	33751.1	37780.1	40046.3	29284.6		14.7658	14.724	15.0426	15.2053	15.2894	14.8379		14.8441		-0.0783717	-0.120146	0.198517	0.361211	0.445253	-0.00627498
30188430	1	25204.7	32976.7	40020.2	33101.2	39451.7	33069.4		14.6214	15.0092	15.2884	15.0146	15.2678	15.0132		14.973		-0.351597	0.0361564	0.315441	0.0415933	0.294798	0.0402084
30188430	1	17273.3	26880.3	35277.6	32340.8	44964.7	31949.7		14.0763	14.7143	15.1065	14.9811	15.4565	14.9635		14.6323		-0.55607	0.0819324	0.474137	0.348737	0.824176	0.331188
30188430	1	16096.8	28211.7	27365.7	28375.8	48465.4	34364		13.9745	14.784	14.7401	14.7924	15.5647	15.0686		14.4995		-0.525039	0.284482	0.240557	0.292848	1.06514	0.569084
30188430	1	26452.2	28479.7	35087.9	28102.6	41919.1	25502.6		14.6911	14.7976	15.0987	14.7784	15.3553	14.6384		14.8625		-0.171379	-0.0648305	0.236209	-0.0840588	0.492843	-0.224121
30188430	1	19178.2	28825.1	29682.2	27971.6	50004.4	31082.3		14.2272	14.815	14.8573	14.7717	15.6098	14.9238		14.6332		-0.405998	0.181864	0.224135	0.138501	0.976591	0.29063
30188430	1	26741.2	31113	39650.7	31443.6	47295.2	22147.9		14.7068	14.9252	15.2751	14.9405	15.5294	14.4349		14.969		-0.262246	-0.0437913	0.306037	-0.0285466	0.560382	-0.534141
30188443	1	46462.8	54800.8	55545	55795.7	63009.6	55925.1		15.5038	15.7419	15.7614	15.7679	15.9433	15.7712		15.669		-0.165234	0.0728868	0.0923473	0.0988435	0.274261	0.102185
30188451	1	16651.8	13789.7	16190.9	14231.2	14013.7	21505		14.0234	13.7513	13.9829	13.7968	13.7746	14.3924		13.9192		0.104192	-0.16789	0.0636985	-0.122426	-0.144647	0.473185
30188451	1	19737.4	20240.6	23607.4	18665.1	26169.1	25616.5		14.2686	14.305	14.527	14.1881	14.6756	14.6448		14.3669		-0.0982094	-0.0618895	0.160099	-0.1788	0.308722	0.277933
30188483	1	2044.07	2151.34	2220.74	3486.48	2758.78	2695.63		10.9972	11.071	11.1168	11.7676	11.4298	11.3964		11.0617		-0.0644627	0.00932887	0.0551338	0.705866	0.368124	0.334717
30188483	1	2604.32	3422.68	3599.27	3202.85	1938.26	3280.57		11.3467	11.7409	11.8135	11.6451	10.9205	11.6797		11.6337		-0.287004	0.107214	0.179791	0.0114457	-0.713151	0.0460369
30188483	1	6376.98	10763.7	13430.8	8034.35	12935	13428.5		12.6387	13.3939	13.7133	12.972	13.659	13.713		13.2486		-0.609945	0.145285	0.46466	-0.276635	0.410391	0.464412
30188483	1	24915.2	25652.3	30860.4	36858	39506.8	39508		14.6047	14.6468	14.9135	15.1697	15.2698	15.2699		14.7217		-0.116931	-0.0748665	0.191797	0.448019	0.548145	0.548188
30188483	1	37218.2	37421	46599.3	40999.7	43597.8	43920.4		15.1837	15.1916	15.508	15.3233	15.412	15.4226		15.2944		-0.110714	-0.102873	0.213586	0.0288914	0.117536	0.128169
30188483	1	36932.7	34820.3	49757.9	45303.6	47832	56629.5		15.1726	15.0876	15.6026	15.4673	15.5457	15.7893		15.2876		-0.115017	-0.199991	0.315008	0.179708	0.258058	0.501636
30188483	1	50651.7	66791.2	76390.4	88444.8	64369.9	92799.2		15.6283	16.0274	16.2211	16.4325	15.9741	16.5018		15.9589		-0.330609	0.0684381	0.262171	0.473558	0.0151676	0.542893
30188517	1	3773.78	4905.34	4959.09	6327.67	4444.07	4370.67		11.8818	12.2601	12.2759	12.6275	12.1177	12.0936		12.1393		-0.257469	0.120874	0.136595	0.488196	-0.0215972	-0.0456254
30188517	1	4647.67	5939.52	9272.53	9569.01	7617.56	10678.3		12.1823	12.5361	13.1787	13.2242	12.8951	13.3824		12.6324		-0.450099	-0.0962588	0.546358	0.591763	0.262723	0.750005
30188517	1	6163.65	13210.6	13095.7	10469.5	14136.3	12283.4		12.5896	13.6894	13.6768	13.3539	13.7871	13.5844		13.3186		-0.729025	0.370812	0.358212	0.0353155	0.468523	0.265823
30188517	1	15568.5	21689.5	26997.6	27942.4	30435.5	31571.6		13.9263	14.4047	14.7205	14.7702	14.8935	14.9463		14.3505		-0.424192	0.0541784	0.370014	0.419637	0.542936	0.595811
30188533	1	1825.61	2037.88	2172.12	1532.91	3166.12	1917.42		10.8342	10.9929	11.0849	10.5821	11.6285	10.905		10.9706		-0.13647	0.0222182	0.114252	-0.388575	0.657865	-0.0656841
30188533	1	2610.97	2547.75	2302.69	4115.9	2641.54	3282.04		11.3504	11.315	11.1691	12.007	11.3672	11.6804		11.2782		0.0722094	0.0368447	-0.109054	0.728832	0.0890014	0.402214
30188533	1	1467.52	2178.42	2603.1	1380.56	2955.69	2270.15		10.5192	11.0891	11.346	10.431	11.5293	11.1486		10.9848		-0.465583	0.104318	0.361265	-0.553712	0.544529	0.163822
30188533	1	2407.25	3401.59	3205.98	4148.52	3312.31	2851.24		11.2332	11.732	11.6465	12.0184	11.6936	11.4774		11.5372		-0.304067	0.194757	0.10931	0.481142	0.156386	-0.0598629
30188533	1	2220.79	2031.85	3400.35	2933.01	1871.88	3010.55		11.1169	10.9886	11.7315	11.5182	10.8703	11.5558		11.279		-0.162111	-0.290387	0.452498	0.2392	-0.408695	0.276842
30188533	1	2937.86	3045.45	3248.45	2486.18	3219.38	4456.3		11.5205	11.5724	11.6655	11.2797	11.6526	12.1216		11.5862		-0.0656265	-0.0137359	0.0793625	-0.306458	0.0663926	0.535455
30188533	1	2244.31	4109.97	3976.19	3325.31	4351.97	3532.02		11.1321	12.0049	11.9572	11.6993	12.0875	11.7863		11.698		-0.565991	0.306864	0.259127	0.00122532	0.389407	0.0882327
30188533	1	2401.92	3347.89	3123.9	3636.95	3072.02	4043.79		11.23	11.709	11.6091	11.8285	11.585	11.9815		11.516		-0.286075	0.19299	0.0930851	0.312464	0.0689265	0.465445
30188533	1	2292.36	3366.47	2058.89	3970.2	3327.32	4351.09		11.1626	11.717	11.0077	11.955	11.7001	12.0872		11.2958		-0.133148	0.421256	-0.288109	0.659231	0.40438	0.791399
30188533	1	6356.59	5587.9	7945.35	8979.47	12180.3	12855.2		12.634	12.4481	12.9559	13.1324	13.5723	13.6501		12.6793		-0.0453036	-0.23125	0.276554	0.453073	0.89292	0.970722
30188533	1	33591.4	18242.1	27728.9	25570.6	39520.3	32803		15.0358	14.155	14.7591	14.6422	15.2703	15.0015		14.65		0.385841	-0.49498	0.109139	-0.00776271	0.620344	0.351578
30188533	1	54690.3	52961.7	63148.9	60324.9	71277.8	64320		15.739	15.6927	15.9465	15.8805	16.1212	15.973		15.7927		-0.053712	-0.100048	0.15376	0.0877558	0.328455	0.180268
30188542	1	4559.09	3186.11	4248.85	3056.76	4641.36	3574.89		12.1545	11.6376	12.0529	11.5778	12.1803	11.8037		11.9483		0.206209	-0.310743	0.104534	-0.370533	0.232009	-0.144639
30188542	1	5309.09	6481.25	5485.32	4908.05	4509.96	5738.12		12.3743	12.6621	12.4214	12.2609	12.1389	12.4864		12.4859		-0.111639	0.176169	-0.0645299	-0.224955	-0.346991	0.000473655
30188558	1	19887.9	17144	25252.9	26242.4	25000.7	27076.4		14.2796	14.0654	14.6242	14.6796	14.6097	14.7247		14.3231		-0.0434561	-0.257646	0.301102	0.35655	0.28662	0.401689
30188577	1	39864.9	43316.8	43784.8	47730.2	62509.3	46607.8		15.2828	15.4026	15.4181	15.5426	15.9318	15.5083		15.3679		-0.0850391	0.0347663	0.0502728	0.174745	0.563911	0.140412
30188590	1	2395.44	2651.93	3501.33	3985.48	4689.88	3295.2		11.2261	11.3728	11.7737	11.9605	12.1953	11.6861		11.4575		-0.231454	-0.0847038	0.316158	0.503006	0.737805	0.228619
30188590	1	46131.6	55152.4	56011.8	59114.4	60917	57048.6		15.4935	15.7511	15.7734	15.8512	15.8946	15.7999		15.6727		-0.179216	0.0784544	0.100762	0.178541	0.221875	0.127222
30188590	1	141094	194265	174385	195489	251269	211994		17.1063	17.5677	17.4119	17.5767	17.9389	17.6937		17.362		-0.255661	0.205702	0.0499584	0.214766	0.576911	0.331703
30188610	1	3230	3614.87	5329.42	5091.99	3355.2	5159.46		11.6573	11.8197	12.3798	12.314	11.7122	12.333		11.9523		-0.294951	-0.132541	0.427492	0.361743	-0.240086	0.380736
30188610	1	2451.4	4211.9	4324.89	3274.7	3150.81	3629.73		11.2594	12.0403	12.0784	11.6771	11.6215	11.8256		11.7927		-0.533309	0.24756	0.285749	-0.115548	-0.171189	0.0329498
30188610	1	11281.8	16184.6	11876.8	15934.8	20714	8123.49		13.4617	13.9823	13.5359	13.9599	14.3383	12.9879		13.66		-0.198259	0.322368	-0.124109	0.299924	0.678349	-0.672085
30188610	1	7471.68	9119.13	9319.81	11803.6	8484.15	9013.52		12.8672	13.1547	13.1861	13.5269	13.0506	13.1379		13.0693		-0.202111	0.085353	0.116758	0.457617	-0.0187723	0.0685467
30188611	1	6611.02	7231.74	12822.9	10452.5	10552.9	13728.3		12.6907	12.8201	13.6464	13.3516	13.3654	13.7449		13.0524		-0.361749	-0.232281	0.59403	0.299155	0.312943	0.692462
30188611	1	4830.51	7113.26	9914.04	13496	8053.58	12254		12.238	12.7963	13.2753	13.7202	12.9754	13.581		12.7698		-0.531877	0.0264579	0.505419	0.950408	0.205577	0.811127
30188611	1	392030	644896	1.27256e+06	1.24607e+06	843192	1.35649e+06		18.5806	19.2987	20.2793	20.249	19.6855	20.3714		19.3862		-0.805602	-0.0874973	0.893099	0.862752	0.299296	0.985242
30188638	1	5200.73	7914.69	8475.72	10130.3	9018.05	9486.52		12.3445	12.9503	13.0491	13.3064	13.1386	13.2117		12.7813		-0.436813	0.169005	0.267808	0.525076	0.357288	0.430351
30188638	1	5968.18	13370.4	15721.1	14756.7	15108	16452.3		12.5431	13.7068	13.9404	13.8491	13.883	14.006		13.3967		-0.853674	0.310009	0.543665	0.452335	0.486277	0.60925
30188638	1	13848.2	25503.8	32692.8	29597.1	25406.4	32932.6		13.7574	14.6384	14.9967	14.8532	14.6329	15.0072		14.4642		-0.706763	0.17425	0.532513	0.388995	0.168733	0.543057
30188638	1	14157.9	31135.8	36640.6	42799.1	28777.1	42710.4		13.7893	14.9263	15.1612	15.3853	14.8126	15.3823		14.6256		-0.836267	0.300699	0.535568	0.759707	0.187047	0.756712
30188638	1	24746.5	30308.7	34567.1	40226.3	38481.1	40523.2		14.5949	14.8874	15.0771	15.2959	15.2319	15.3065		14.8532		-0.258228	0.0342788	0.22395	0.442689	0.378699	0.453298
30188663	1	16942.5	13961.1	15256.6	13402.1	15050.3	18214.2		14.0484	13.7691	13.8971	13.7102	13.8775	14.1528		13.9049		0.143483	-0.135749	-0.00773407	-0.194704	-0.0273702	0.2479
30188663	1	30631.7	17867.1	21868.2	13401.1	23096.4	19299.8		14.9027	14.125	14.4165	13.7101	14.4954	14.2363		14.4814		0.421303	-0.356413	-0.0648904	-0.771376	0.0139465	-0.245135
30188716	1	20102.3	23445.7	24152.9	19630.2	17611.5	24299.3		14.2951	14.517	14.5599	14.2608	14.1042	14.5686		14.4573		-0.162265	0.0596968	0.102568	-0.196555	-0.35311	0.111287
30188726	1	3761.56	4568.44	6888.82	5952.36	5164.98	9811.68		11.8771	12.1575	12.75	12.5392	12.3345	13.2603		12.2615		-0.384434	-0.104061	0.488494	0.277699	0.0730008	0.998738
30188726	1	6804.71	8390.39	8463.16	10136.1	5081.85	14298.7		12.7323	13.0345	13.047	13.3072	12.3111	13.8036		12.9379		-0.205622	0.0965814	0.109041	0.36928	-0.626802	0.865652
30188726	1	5848.86	7351.88	5629.85	13139.9	2417.32	18069.9		12.5139	12.8439	12.4589	13.6817	11.2392	14.1413		12.6056		-0.0916321	0.238325	-0.146692	1.07609	-1.36638	1.53573
30188726	1	22806.8	34488.6	36187.3	35214	16500.6	63401		14.4772	15.0738	15.1432	15.1039	14.0102	15.9522		14.8981		-0.42089	0.175763	0.245126	0.205792	-0.887833	1.05415
30188726	1	34820.8	47858.2	35410.1	51718.2	34401.2	68586.5		15.0877	15.5465	15.1119	15.6584	15.0702	16.0656		15.2487		-0.16101	0.297808	-0.136797	0.409715	-0.1785	0.816967
30188726	1	28139.1	37070	36777.8	49973.6	24240.4	78384.5		14.7803	15.178	15.1665	15.6089	14.5651	16.2583		15.0416		-0.261312	0.136364	0.124947	0.56728	-0.476471	1.21668
30188726	1	49714.8	93880.9	82330.8	122074	41907.5	175185		15.6014	16.5185	16.3291	16.8974	15.3549	17.4185		16.1497		-0.548305	0.368852	0.179453	0.747702	-0.79477	1.26883
30188726	1	60858.3	144640	125473	128011	52437.8	277993		15.8932	17.1421	16.937	16.9659	15.6783	18.0847		16.6574		-0.764264	0.484675	0.279589	0.308473	-0.979109	1.42726
30188726	1	146214	207027	195940	217542	118111	336932		17.1577	17.6595	17.58	17.7309	16.8498	18.3621		17.4657		-0.308023	0.193716	0.114307	0.265193	-0.615955	0.896354
30188726	1	75075.8	168938	122771	179088	52269.6	343386		16.1961	17.3661	16.9056	17.4503	15.6737	18.3895		16.8226		-0.626542	0.543531	0.0830113	0.627704	-1.14892	1.56687
30188726	1	293501	705024	601508	715627	221734	1.485e+06		18.163	19.4273	19.1982	19.4488	17.7585	20.502		18.9295		-0.766508	0.497798	0.26871	0.519332	-1.17104	1.57252
30188730	1	5893.65	6664.66	7447.95	5676.37	8207.95	9683.97		12.5249	12.7023	12.8626	12.4708	13.0028	13.2414		12.6966		-0.171684	0.00568655	0.165998	-0.225877	0.306177	0.544753
30188730	1	20730	20213.4	27131.5	23680.3	22255.9	30069.3		14.3394	14.303	14.7277	14.5314	14.4419	14.876		14.4567		-0.117278	-0.153689	0.270967	0.0746846	-0.0148098	0.419292
30188742	1	20414	22942.5	29780	33482.5	30696.9	34071		14.3173	14.4857	14.8621	15.0311	14.9058	15.0563		14.555		-0.237748	-0.0692871	0.307035	0.476096	0.350785	0.501233
30188745	1	56269.7	59500.6	80361.9	69080.1	77021	91505		15.7801	15.8606	16.2942	16.076	16.233	16.4816		15.9783		-0.198233	-0.117687	0.31592	0.0976775	0.25466	0.503259
30188745	1	89970.1	83842	146603	119657	104353	163944		16.4572	16.3554	17.1616	16.8685	16.6711	17.3228		16.658		-0.200876	-0.302647	0.503523	0.210514	0.0130794	0.664806
30188767	1	57990.6	33495	49274.6	70618.1	41480.6	189169		15.8235	15.0317	15.5886	16.1078	15.3402	17.5293		15.4812		0.342283	-0.44959	0.107307	0.626502	-0.141099	2.04807
30188857	1	2001.76	1271.45	2633.5	1639.73	2150.63	2577.46		10.9671	10.3123	11.3628	10.6792	11.0705	11.3317		10.8807		0.0863604	-0.568431	0.482071	-0.201452	0.18985	0.451041
30188858	1	3957.66	4210.07	5410.6	4702.49	6600.05	6302.58		11.9504	12.0396	12.4016	12.1992	12.6883	12.6217		12.1305		-0.180113	-0.0909158	0.271029	0.0686649	0.557716	0.49118
30188858	1	5497.42	4711.16	5629.44	4164.68	6019.98	6549.51		12.4245	12.2019	12.4588	12.024	12.5555	12.6772		12.3617		0.0628127	-0.159861	0.0970482	-0.337738	0.193815	0.315444
30188890	1	25577.6	22848.5	28716.5	27150.8	29067.6	27098.1		14.6426	14.4798	14.8096	14.7287	14.8271	14.7259		14.644		-0.00140294	-0.164189	0.165592	0.0847111	0.183124	0.0819046
30188890	1	74918.1	78308.2	97689.3	63068.1	95462.3	81313.2		16.193	16.2569	16.5759	15.9446	16.5426	16.3112		16.3419		-0.148912	-0.0850624	0.233975	-0.397316	0.200705	-0.0307359
30188897	1	6147.03	6148.74	8755.41	8833.53	8915.63	11819		12.5857	12.5861	13.096	13.1088	13.1221	13.5288		12.7559		-0.170228	-0.169828	0.340056	0.352872	0.366219	0.772923
30188906	1	13265	16951.3	17351.6	22966.9	18427.5	28881.1		13.6953	14.0491	14.0828	14.4873	14.1696	14.8178		13.9424		-0.247071	0.1067	0.140372	0.544854	0.227161	0.875428
30188945	1	3654.9	4098.29	8199.51	8558.72	5802.29	5841.97		11.8356	12.0008	13.0013	13.0632	12.5024	12.5122		12.2792		-0.443631	-0.278442	0.722073	0.783931	0.223158	0.232992
30188945	1	4427.66	4952.55	5606.55	6687.7	5870.35	6216.92		12.1123	12.274	12.4529	12.7073	12.5192	12.602		12.2797		-0.1674	-0.00577131	0.173171	0.427568	0.239504	0.322257
30188945	1	7580.95	6534.72	10307	8747.74	10074.5	7078.82		12.8882	12.6739	13.3313	13.0947	13.2984	12.7893		12.9645		-0.0763073	-0.290561	0.366869	0.130224	0.333956	-0.175178
30188945	1	9106.39	17318.8	15816.4	20693.9	22321.1	19360		13.1527	14.08	13.9491	14.3369	14.4461	14.2408		13.7273		-0.574619	0.352766	0.221853	0.609635	0.718838	0.51351
30188945	1	10995.3	12859.4	17985.4	20413.5	22486.7	18477		13.4246	13.6505	14.1345	14.3172	14.4568	14.1734		13.7366		-0.311962	-0.0860229	0.397985	0.580678	0.720232	0.436888
30188945	1	15462.2	21302.5	21322.6	21432.3	25911.5	24656.2		13.9165	14.3787	14.3801	14.3875	14.6613	14.5897		14.2251		-0.308636	0.15364	0.154996	0.162402	0.43621	0.364567
30188945	1	54733.8	88840	104320	107422	102479	105369		15.7401	16.4389	16.6707	16.7129	16.645	16.6851		16.2832		-0.543098	0.155681	0.387417	0.429684	0.361732	0.401846
30188961	1	6724.04	8538.95	9149.54	6559.05	7519.19	7554.05		12.7151	13.0598	13.1595	12.6793	12.8764	12.883		12.9781		-0.263034	0.0816961	0.181337	-0.298877	-0.101786	-0.0951119
30188961	1	30062.9	25865.8	38707.7	37894.4	34689.7	46980.1		14.8757	14.6588	15.2403	15.2097	15.0822	15.5198		14.9249		-0.0492349	-0.266169	0.315404	0.284768	0.157292	0.594832
30188973	1	12172.7	17860.8	18467.3	21017.2	16593.1	26773.8		13.5714	14.1245	14.1727	14.3593	14.0183	14.7085		13.9562		-0.384821	0.168321	0.2165	0.403098	0.0621041	0.752345
30189025	1	27876.9	2809.63	11776.3	4737.44	24790	11277.8		14.7668	11.4562	13.5236	12.2099	14.5975	13.4612		13.2488		1.51793	-1.79268	0.274751	-1.03896	1.34862	0.212345
30189025	1	34522.8	12242.1	19521.5	14950.2	35039.5	15417.8		15.0753	13.5796	14.2528	13.8679	15.0967	13.9123		14.3025		0.772728	-0.722968	-0.0497598	-0.434657	0.794161	-0.390224
30189025	1	52176.5	15460.6	28789.8	25139.8	45552.9	38295.9		15.6711	13.9163	14.8133	14.6177	15.4753	15.2249		14.8002		0.870884	-0.883924	0.0130402	-0.182542	0.675026	0.424672
30189025	1	95701	26965.6	46012.7	31414.1	91090.4	44480.1		16.5462	14.7188	15.4897	14.9391	16.475	15.4409		15.5849		0.961306	-0.866109	-0.0951974	-0.645817	0.890071	-0.144069
30189101	1	82772	73261.2	174293	84081.4	170887	80543.2		16.3369	16.1608	17.4112	16.3595	17.3827	16.2975		16.6363		-0.299402	-0.475494	0.774896	-0.276757	0.746429	-0.338782
30189139	1	27433.6	32496.1	33589.5	26464.6	31850.9	39331.4		14.7437	14.988	15.0357	14.6918	14.959	15.2634		14.9225		-0.178796	0.0655252	0.11327	-0.230677	0.0365916	0.340939
30189139	1	43978.7	47984	41270.5	35704.5	42014.1	53197.9		15.4245	15.5503	15.3328	15.1238	15.3586	15.6991		15.4359		-0.0113505	0.114397	-0.103046	-0.31205	-0.0772831	0.263212
30189139	1	54639	61594.2	53168.9	37121.2	44301	70176.6		15.7376	15.9105	15.6983	15.18	15.4351	16.0987		15.7821		-0.0445048	0.128359	-0.0838539	-0.602192	-0.347095	0.316555
30189177	1	2618.58	2040.3	4451.94	2458.59	5680.98	5064.85		11.3546	10.9946	12.1202	11.2636	12.4719	12.3063		11.4898		-0.135213	-0.495221	0.630434	-0.226167	0.982141	0.816519
30189177	1	4670.57	2624.94	7735.2	5028.59	4975.58	6069.37		12.1894	11.3581	12.9172	12.2959	12.2806	12.5673		12.1549		0.0344924	-0.796825	0.762332	0.141046	0.125758	0.412439
30189177	1	4595.88	5188.87	6844.04	4452.94	5981.59	7375.71		12.1661	12.3412	12.7406	12.1205	12.5463	12.8486		12.416		-0.249863	-0.0747833	0.324646	-0.295445	0.130326	0.432579
30189177	1	7782.16	5112.16	11187.7	4277.41	11812.5	9468.06		12.926	12.3197	13.4496	12.0625	13.528	13.2089		12.8984		0.0275227	-0.578716	0.551193	-0.83591	0.629597	0.310421
30189177	1	14713.6	8998.98	17504.8	14351.8	21390.1	22230		13.8449	13.1355	14.0955	13.8089	14.3847	14.4402		13.692		0.152909	-0.556412	0.403503	0.116991	0.692698	0.748264
30189177	1	50902.5	18765.8	45371.4	28604.7	53117	60376.1		15.6355	14.1958	15.4695	14.804	15.6969	15.8817		15.1003		0.535195	-0.904434	0.369239	-0.296288	0.59663	0.781434
30189177	1	47458.4	16322.3	30537.2	24058.9	49976.9	56218.7		15.5344	13.9946	14.8983	14.5543	15.609	15.7788		14.8091		0.725304	-0.814512	0.0892074	-0.254788	0.799902	0.969691
30189177	1	50737.9	19236.9	41863.8	32353.3	52075.2	55280.8		15.6308	14.2316	15.3534	14.9816	15.6683	15.7545		15.0719		0.558849	-0.840336	0.281488	-0.090303	0.59638	0.682563
30189177	1	49469.1	24162.5	52272.5	35012.7	57849.1	64830.7		15.5942	14.5605	15.6738	15.0956	15.82	15.9844		15.2762		0.318077	-0.715678	0.397601	-0.180571	0.543843	0.708228
30189177	1	185396	96682.1	198981	143878	274557	283150		17.5003	16.561	17.6023	17.1345	18.0667	18.1112		17.2212		0.279091	-0.6602	0.381109	-0.0866703	0.845585	0.890046
30189214	1	12095	11021.7	12429.7	9549.63	13554.8	16460.9		13.5621	13.4281	13.6015	13.2212	13.7265	14.0068		13.5306		0.031564	-0.102501	0.0709371	-0.309331	0.195958	0.476193
30189214	1	25568.1	26970.7	36774.3	35001.3	27084.6	42695.5		14.6421	14.7191	15.1664	15.0951	14.7252	15.3818		14.8425		-0.200467	-0.123419	0.323887	0.252598	-0.117335	0.539275
30189239	1	9854.72	12039	9559.61	21259	27761.3	6099.59		13.2666	13.5554	13.2227	14.3758	14.7608	12.5745		13.3483		-0.0816566	0.207176	-0.125519	1.02753	1.41253	-0.773758
30189287	1	23985.7	20681.9	17339.4	19803.6	18543.1	26215.5		14.5499	14.3361	14.0818	14.2735	14.1786	14.6781		14.3226		0.227307	0.0135039	-0.240811	-0.0491034	-0.143985	0.355555
30189287	1	21637	29145.3	30437.4	29659.5	28921.5	31489		14.4012	14.831	14.8936	14.8562	14.8199	14.9426		14.7086		-0.307371	0.122393	0.184977	0.147624	0.111275	0.233978
30189287	1	33389.7	37438.7	34819	34663.6	33099.4	42664.8		15.0271	15.1922	15.0876	15.0811	15.0145	15.3808		15.1023		-0.0752004	0.0899278	-0.0147274	-0.0211814	-0.0877975	0.278444
30189301	1	27444.3	41326	38898.1	32543.4	46207.3	30419.7		14.7442	15.3348	15.2474	14.9901	15.4958	14.8927		15.1088		-0.364577	0.225963	0.138614	-0.118721	0.387035	-0.216079
30189385	1	17851.7	21491.6	25465.1	21943.1	27179.2	31469.1		14.1238	14.3915	14.6362	14.4215	14.7302	14.9416		14.3838		-0.26006	0.00765725	0.252402	0.0376459	0.346383	0.557819
30189411	1	2170.53	2409.89	2966.05	1525.77	2531.61	2441.11		11.0838	11.2348	11.5343	10.5753	11.3058	11.2533		11.2843		-0.200472	-0.0495514	0.250023	-0.708986	0.0215353	-0.0309824
30189411	1	16690.4	16325.6	23376.2	24275.4	20953.1	30743.1		14.0267	13.9948	14.5128	14.5672	14.3549	14.908		14.1781		-0.151378	-0.183262	0.33464	0.389098	0.176764	0.729862
30189411	1	17499.9	15625.9	28415.5	24613.7	25516.6	34443.9		14.0951	13.9316	14.7944	14.5872	14.6391	15.072		14.2737		-0.178639	-0.342053	0.520692	0.313476	0.365446	0.798261
30189411	1	16133.3	21757.7	21565.7	30004.9	23911.8	32589.1		13.9778	14.4092	14.3965	14.8729	14.5454	14.9921		14.2611		-0.283394	0.148091	0.135303	0.61176	0.284288	0.730954
30189412	1	14496.9	22429.9	21298.8	28039.6	25464.1	25899.6		13.8235	14.4531	14.3785	14.7752	14.6362	14.6606		14.2184		-0.3949	0.234778	0.160122	0.556818	0.417818	0.442281
30189504	1	28380.8	40496.7	46120.7	47676.3	43370.7	53586		14.7926	15.3055	15.4931	15.541	15.4044	15.7096		15.1971		-0.404462	0.108427	0.296035	0.343895	0.207343	0.512478
30189540	1	4002.48	6212.53	6209.63	8138.88	8132.58	7728.21		11.9667	12.601	12.6003	12.9906	12.9895	12.9159		12.3893		-0.422634	0.211654	0.21098	0.601302	0.600186	0.526608
30189559	1	9944.02	11836.7	15121.2	12387.3	16344.1	14478.8		13.2796	13.531	13.8843	13.5966	13.9965	13.8217		13.565		-0.285345	-0.0339832	0.319328	0.0316202	0.431526	0.256698
30189559	1	20721.2	41732.2	42037.2	51002.5	51890.7	52652.4		14.3388	15.3489	15.3594	15.6383	15.6632	15.6842		15.0157		-0.676872	0.333183	0.343689	0.622592	0.647501	0.668523
30189559	1	61206	128275	139429	148695	158097	157529		15.9014	16.9689	17.0892	17.182	17.2705	17.2653		16.6531		-0.75176	0.315731	0.436029	0.528853	0.617307	0.612116
30189575	1	9485.49	11418.5	16302.6	12658.2	12862.3	15127.5		13.2115	13.4791	13.9928	13.6278	13.6509	13.8849		13.5611		-0.34963	-0.0820473	0.431677	0.0666428	0.0897303	0.323754
30189591	1	10402.5	13707.5	21912.2	20139.7	18202.2	20267		13.3446	13.7427	14.4194	14.2978	14.1518	14.3068		13.8356		-0.490947	-0.09291	0.583857	0.462164	0.316235	0.471256
30189591	1	11603.7	15925.3	19011.5	11952.3	17113	20905.5		13.5023	13.959	14.2146	13.545	14.0628	14.3516		13.892		-0.389676	0.0670597	0.322616	-0.346973	0.170832	0.459626
30189596	1	1707.29	3991.73	1673.22	4463.94	4027.37	3871.12		10.7375	11.9628	10.7084	12.1241	11.9756	11.9185		11.1362		-0.39874	0.826567	-0.427826	0.987867	0.839387	0.782301
30189596	1	8717.57	14858.7	17167.1	22506.6	20504.1	25355.2		13.0897	13.859	14.0674	14.4581	14.3236	14.63		13.672		-0.582322	0.186994	0.395328	0.786032	0.65159	0.957964
30189596	1	18153.4	28253.5	31676.1	40944.6	32216.5	46967.3		14.148	14.7861	14.9511	15.3214	14.9755	15.5194		14.6284		-0.480449	0.15774	0.322709	0.692986	0.347111	0.890967
30189596	1	14941.3	24829.4	30123.7	30803.3	26017.7	37096.4		13.867	14.5998	14.8786	14.9108	14.6672	15.179		14.4485		-0.581443	0.151298	0.430145	0.46233	0.218739	0.730527
30189650	1	1103.32	1383.23	2192.15	483.068	1222.92	1400.01		10.1076	10.4338	11.0981	8.91608	10.2561	10.4512		10.5465		-0.438899	-0.112704	0.551603	-1.63045	-0.290411	-0.0953088
30189650	1	2194.13	804.614	2537.74	2037.28	2301.98	2417.99		11.0994	9.65215	11.3093	10.9924	11.1687	11.2396		10.687		0.412463	-1.03482	0.622356	0.305458	0.481686	0.552621
30189650	1	1139.82	978.728	808.278	959.334	1211.55	2078.46		10.1546	9.93476	9.65871	9.90589	10.2426	11.0213		9.91602		0.238567	0.0187448	-0.257312	-0.0101298	0.326617	1.10528
30189650	1	4680.53	6692.65	5837.03	5124.67	7535.8	7133.55		12.1925	12.7084	12.511	12.3232	12.8795	12.8004		12.4706		-0.278157	0.23775	0.0404072	-0.147369	0.408932	0.329793
30189650	1	11967.6	15908.7	14842.6	12266	18556.7	11697.9		13.5469	13.9575	13.8575	13.5824	14.1797	13.514		13.7873		-0.240427	0.170247	0.0701794	-0.204901	0.392374	-0.273309
30189650	1	34774.3	22729.4	32261.2	15836.6	26475.3	26321.3		15.0857	14.4723	14.9775	13.951	14.6924	14.6839		14.8452		0.240562	-0.3729	0.132338	-0.894196	-0.152816	-0.16123
30189650	1	32879.2	37076.1	41953.9	38668.5	48011.8	40647.9		15.0049	15.1782	15.3565	15.2389	15.5511	15.3109		15.1799		-0.174981	-0.00166643	0.176648	0.0590034	0.371233	0.131024
30189695	1	6848.86	7813.31	10539.6	9484.22	9839.78	10944.8		12.7416	12.9317	13.3635	13.2113	13.2644	13.418		13.0123		-0.270652	-0.0805817	0.351234	0.199015	0.252112	0.405665
30189695	1	21235.2	23272.6	38547.2	31107.9	22373.7	34949.4		14.3742	14.5063	15.2343	14.925	14.4495	15.093		14.705		-0.330782	-0.198605	0.529387	0.22004	-0.255436	0.388027
30189739	1	3009.8	4332.4	4113.34	4154.35	4367.27	4845.29		11.5555	12.081	12.0061	12.0204	12.0925	12.2424		11.8808		-0.325381	0.200118	0.125263	0.139576	0.211682	0.361536
30189742	1	28835.3	38284.7	48098.5	41594.5	43040.6	42493.6		14.8155	15.2245	15.5537	15.3441	15.3934	15.375		15.1979		-0.382364	0.0265708	0.355793	0.146194	0.195498	0.177047
30189762	1	3583.59	3614.51	4547.6	4772.86	5591.09	5125.5		11.8072	11.8196	12.1509	12.2206	12.4489	12.3235		11.9259		-0.118698	-0.106304	0.225002	0.294749	0.523025	0.397587
30189762	1	7458.6	8181.45	6888.77	7361.23	10463.4	9860.77		12.8647	12.9981	12.75	12.8457	13.3531	13.2675		12.871		-0.00626491	0.127188	-0.120923	-0.0252221	0.482105	0.396531
30189762	1	6480.77	10532.8	10611.8	11113.6	12892.9	14561.8		12.6619	13.3626	13.3734	13.44	13.6543	13.8299		13.1326		-0.470697	0.22996	0.240737	0.307397	0.521644	0.697256
30189762	1	15991.4	13479.7	21075.8	18886.2	19092.6	23917.3		13.965	13.7185	14.3633	14.205	14.2207	14.5458		14.0156		-0.0505974	-0.297099	0.347696	0.189446	0.205125	0.530164
30189762	1	24675	35406.3	45255.9	40682.1	46986.7	39657.6		14.5908	15.1117	15.4658	15.3121	15.52	15.2753		15.0561		-0.465335	0.0556186	0.409717	0.256005	0.463865	0.21921
30189762	1	42049.8	53351.9	51978.4	61433.1	63095.4	66114.2		15.3598	15.7033	15.6656	15.9067	15.9452	16.0127		15.5762		-0.216418	0.127023	0.0893951	0.330499	0.369018	0.436444
30189762	1	70541.3	105960	116783	116784	122477	150901		16.1062	16.6932	16.8335	16.8335	16.9021	17.2032		16.5443		-0.438089	0.148887	0.289202	0.289219	0.357877	0.658975
30189762	1	178213	155496	143819	177351	183683	232017		17.4432	17.2465	17.1339	17.4362	17.4869	17.8239		17.2746		0.168686	-0.0280318	-0.140654	0.161693	0.212304	0.549319
30189942	1	14217.9	12489.4	19719	16361.9	18356.9	20393.8		13.7954	13.6084	14.2673	13.9981	14.164	14.3158		13.8904		-0.0949564	-0.281961	0.376917	0.107675	0.273652	0.425461
30189942	1	12747.1	13401.6	15274.8	15044	17348.1	21012.7		13.6379	13.7101	13.8989	13.8769	14.0825	14.359		13.749		-0.111073	-0.0388378	0.149911	0.12795	0.333537	0.61002
30190022	1	1554.22	2722.24	2399.74	3654.54	3937.54	3441.67		10.602	11.4106	11.2287	11.8355	11.9431	11.7489		11.0804		-0.47843	0.330172	0.148258	0.755068	0.862673	0.668488
30190028	1	5037.5	9722.73	15186.2	13078.3	12731.9	13256.7		12.2985	13.2471	13.8905	13.6749	13.6362	13.6944		13.1454		-0.846877	0.101775	0.745102	0.529514	0.490792	0.54906
30190028	1	5121.52	8569.16	10312.3	10282.5	10299.6	13846.5		12.3224	13.0649	13.3321	13.3279	13.3303	13.7572		12.9065		-0.5841	0.158483	0.425618	0.421449	0.423842	0.850778
30190028	1	4882.45	11894.1	17349	12328	13042.2	16987.9		12.2534	13.538	14.0826	13.5897	13.6709	14.0522		13.2913		-1.03791	0.246649	0.791265	0.298348	0.3796	0.760918
30190028	1	15077.2	19221.8	29142.3	25866.8	23655.2	32995		13.8801	14.2305	14.8308	14.6588	14.5299	15.01		14.3138		-0.433704	-0.083332	0.517036	0.345025	0.216082	0.696171
30190028	1	13037.3	19726.6	31187	27357.3	28258.5	28479.8		13.6704	14.2679	14.9287	14.7396	14.7864	14.7977		14.289		-0.618603	-0.0210981	0.639701	0.450681	0.497442	0.508698
30190028	1	21139.2	35652.1	40696.2	34960	34930.3	34176.3		14.3676	15.1217	15.3126	15.0934	15.0922	15.0607		14.934		-0.566345	0.187719	0.378626	0.15944	0.158211	0.126731
30190028	1	17754.3	30938.2	41943.7	33772.4	34391.4	45137.5		14.1159	14.9171	15.3562	15.0436	15.0698	15.462		14.7964		-0.680505	0.12072	0.559785	0.247174	0.273376	0.665658
30190056	1	28401.2	54803.1	51704.9	50766	52098	65728.8		14.7937	15.742	15.658	15.6316	15.6689	16.0042		15.3979		-0.604218	0.344088	0.26013	0.233694	0.271058	0.606356
30190058	1	12950.8	14684.2	14418.3	15049	15856.5	14478.6		13.6608	13.842	13.8156	13.8774	13.9528	13.8216		13.7728		-0.112023	0.0691959	0.042827	0.104596	0.180009	0.0488496
30190101	1	10300.9	11186.5	12569	12189.4	14984.7	18468.7		13.3305	13.4495	13.6176	13.5733	13.8712	14.1728		13.4659		-0.135363	-0.0163735	0.151736	0.107489	0.405349	0.706948
30190101	1	14762.3	19436.6	20794.1	22117.8	19260.2	29739.4		13.8496	14.2465	14.3439	14.4329	14.2333	14.8601		14.1467		-0.297038	0.0998223	0.197216	0.286252	0.0866647	0.713418
30190101	1	14611.1	16945.8	19604.3	19443.1	16996.8	25107.8		13.8348	14.0486	14.2589	14.247	14.053	14.6159		14.0474		-0.212657	0.00120631	0.21145	0.19954	0.00553881	0.568417
30190101	1	24926	35013.5	46710.4	51042.4	37736.2	50790.7		14.6054	15.0956	15.5115	15.6394	15.2037	15.6323		15.0708		-0.465452	0.0248091	0.440642	0.568595	0.13285	0.561464
30190101	1	19017.1	29269.7	31932.1	37589	30914.8	41017.6		14.215	14.8371	14.9627	15.198	14.916	15.324		14.6716		-0.456607	0.165504	0.291103	0.526403	0.244391	0.652336
30190101	1	39801.5	48102.8	62433.3	57743.5	58008	73162.4		15.2805	15.5538	15.93	15.8174	15.824	16.1588		15.5881		-0.307596	-0.0342979	0.341894	0.229238	0.235832	0.570681
30190130	1	2677.39	4307.13	3003.56	4587.26	3896.85	3622.36		11.3866	12.0725	11.5525	12.1634	11.9281	11.8227		11.6705		-0.283917	0.401985	-0.118068	0.492891	0.257567	0.152189
30190130	1	7415.82	9428.07	9920.99	12141.1	10896.4	11344		12.8564	13.2027	13.2763	13.5676	13.4116	13.4696		13.1118		-0.255411	0.0909446	0.164467	0.455813	0.29976	0.357837
30190130	1	11698.4	12869.2	13602.2	14122.8	19788.6	14706.3		13.514	13.6516	13.7316	13.7857	14.2724	13.8441		13.6324		-0.118382	0.0192323	0.0991501	0.15333	0.639977	0.211744
30190130	1	9198.9	12953.1	13685	20721.3	16464.1	15720.3		13.1672	13.661	13.7403	14.3388	14.007	13.9403		13.5229		-0.355611	0.138156	0.217455	0.815973	0.484177	0.417487
30190130	1	19417.9	22326.2	21103.6	23286.7	26632.6	20209.8		14.2451	14.4465	14.3652	14.5072	14.7009	14.3028		14.3523		-0.107154	0.0942013	0.0129524	0.154969	0.348657	-0.0494823
30190130	1	17780.3	22834.3	20782.4	29535.3	25002.8	29561.5		14.118	14.4789	14.3431	14.8502	14.6098	14.8514		14.3133		-0.195332	0.165587	0.0297453	0.536823	0.296473	0.538104
30190130	1	21585.3	30261.8	30722.5	38803.8	40671.4	34257.1		14.3978	14.8852	14.907	15.2439	15.3117	15.0641		14.73		-0.33223	0.155217	0.177013	0.513915	0.581733	0.334122
30190130	1	19169.1	34421.8	21201.3	32108.1	29127.9	35165.8		14.2265	15.071	14.3719	14.9707	14.8301	15.1019		14.5565		-0.329968	0.514569	-0.184601	0.414186	0.273649	0.54542
30190130	1	32130.8	40034.5	32414.4	41228.9	60628.8	27665.6		14.9717	15.289	14.9843	15.3314	15.8877	14.7558		15.0817		-0.10999	0.2073	-0.0973098	0.24971	0.806058	-0.325852
30190130	1	23145.8	38242.3	36418.6	43033.5	50892.8	40460.6		14.4985	15.2229	15.1524	15.3932	15.6352	15.3042		14.9579		-0.459449	0.264971	0.194478	0.435263	0.677261	0.346318
30190130	1	61902.2	78611.1	57968.6	86604.1	107908	46166.8		15.9177	16.2624	15.823	16.4021	16.7194	15.4946		16.001		-0.0833417	0.261401	-0.178059	0.401104	0.718398	-0.506475
30190130	1	48693.9	90144.3	67280	95007.1	94413.2	84647.1		15.5715	16.4599	16.0379	16.5357	16.5267	16.3692		16.0231		-0.451644	0.436851	0.0147936	0.51265	0.503603	0.346076
30190130	1	71917.1	110470	93876.1	137756	142699	106441		16.134	16.7533	16.5185	17.0718	17.1226	16.6997		16.4686		-0.334559	0.284693	0.0498655	0.603153	0.654007	0.23109
30190130	1	107947	176116	124229	211708	189847	163262		16.72	17.4262	16.9226	17.6917	17.5345	17.3168		17.0229		-0.302957	0.403242	-0.100285	0.66879	0.511552	0.293908
30190132	1	2563.97	2851.87	2704.12	3032.75	2633.94	5350.96		11.3242	11.4777	11.4009	11.5664	11.363	12.3856		11.4009		-0.0767684	0.0767587	9.73012e-06	0.165478	-0.0379263	0.984649
30190132	1	3131.2	3278.97	5806.59	3488.47	5622.22	5642.96		11.6125	11.679	12.5035	11.7684	12.4569	12.4622		11.9317		-0.319167	-0.252641	0.571808	-0.163289	0.525255	0.530567
30190132	1	5080.35	3649.99	5176.33	4843.86	5824.39	5207.09		12.3107	11.8337	12.3377	12.2419	12.5079	12.3463		12.1607		0.15001	-0.327024	0.177014	0.0812407	0.34719	0.18556
30190132	1	57576.7	57884	64027.5	71083.3	67293.4	76120.6		15.8132	15.8209	15.9664	16.1172	16.0382	16.216		15.8668		-0.0536295	-0.0459493	0.0995787	0.250397	0.171351	0.349173
30190132	1	165089	132943	208804	214496	172543	236447		17.3329	17.0205	17.6718	17.7106	17.3966	17.8512		17.3417		-0.00882566	-0.321257	0.330083	0.368883	0.0548919	0.509453
30190132	1	214949	253893	333125	314645	305487	395267		17.7136	17.9539	18.3457	18.2634	18.2208	18.5925		18.0044		-0.290766	-0.0505393	0.341305	0.258963	0.216352	0.588066
30190141	1	2634.99	2516.83	4422.59	4981.28	4446.21	6508.98		11.3636	11.2974	12.1107	12.2823	12.1184	12.6682		11.5905		-0.226969	-0.293158	0.520127	0.69175	0.527811	1.07767
30190141	1	4942.01	6506.04	7970.47	8400.02	8709.36	11022.1		12.2709	12.6676	12.9604	13.0362	13.0884	13.4281		12.633		-0.362083	0.0345993	0.327484	0.403212	0.455386	0.795142
30190141	1	10626.4	11003.7	14527	15064.5	13718.6	19132.5		13.3754	13.4257	13.8265	13.8789	13.7438	14.2237		13.5425		-0.167147	-0.116801	0.283947	0.336363	0.201343	0.681233
30190141	1	12855.1	22028.3	25803.2	24052	30844.4	25162.2		13.6501	14.4271	14.6553	14.5539	14.9127	14.619		14.2441		-0.594072	0.182941	0.411131	0.309741	0.668592	0.374839
30190141	1	39724.6	15572.5	32150.1	26255	38940.9	37644.1		15.2777	13.9267	14.9725	14.6803	15.249	15.2001		14.7257		0.552078	-0.798948	0.24687	-0.04536	0.523333	0.474471
30190141	1	53441.2	62196.3	181084	79658.7	67294.8	146076		15.7057	15.9245	17.4663	16.2815	16.0382	17.1564		16.3655		-0.659837	-0.440959	1.1008	-0.0839555	-0.327294	0.790861
30190141	1	58229.7	74374	204082	83317.9	68913.7	156351		15.8295	16.1825	17.6388	16.3463	16.0725	17.2544		16.5503		-0.720788	-0.367744	1.08853	-0.203917	-0.477753	0.704177
30190141	1	139858	214537	331782	360838	238413	380348		17.0936	17.7109	18.3399	18.461	17.8631	18.537		17.7148		-0.621177	-0.00391741	0.625094	0.74621	0.148319	0.822178
30190153	1	2467.45	5034.77	6372.66	5606.53	5564.65	10269		11.2688	12.2977	12.6377	12.4529	12.4421	13.326		12.0681		-0.799261	0.229645	0.569616	0.384828	0.37401	1.25794
30190170	1	2477.41	2321.18	3725.03	4262.43	4728.92	5882.97		11.2746	11.1806	11.863	12.0575	12.2073	12.5223		11.4394		-0.164815	-0.25879	0.423604	0.618027	0.767863	1.0829
30190170	1	3742.41	3732.08	3524.62	5831.86	4003.13	4888.72		11.8698	11.8658	11.7833	12.5097	11.9669	12.2552		11.8396		0.0301638	0.0261761	-0.0563399	0.67015	0.127323	0.41565
30190170	1	115696	144394	219372	264223	251145	258672		16.82	17.1397	17.743	18.0114	17.9382	17.9808		17.2342		-0.414241	-0.0945635	0.508804	0.77718	0.703942	0.746545
30190217	1	2121.86	3963.47	8087.58	3305.34	3071.61	5094.17		11.0511	11.9525	12.9815	11.6906	11.5848	12.3146		11.9951		-0.943936	-0.0425034	0.98644	-0.30447	-0.410274	0.31958
30190217	1	1639.45	1743.71	3970.84	3160.22	2258.96	4429.72		10.679	10.7679	11.9552	11.6258	11.1414	12.113		11.1341		-0.45506	-0.366114	0.821173	0.491756	0.00738512	0.978946
30190217	1	9522.69	7226.66	16395	8882.35	10941.8	20842.9		13.2172	12.8191	14.001	13.1167	13.4176	14.3473		13.3457		-0.128593	-0.526633	0.655225	-0.22902	0.0718188	1.00152
30190217	1	8941.44	12442.6	17393.4	13478.8	11641	21994.7		13.1263	13.603	14.0863	13.7184	13.5069	14.4249		13.6052		-0.47889	-0.00218358	0.481074	0.113224	-0.0982601	0.819689
30190217	1	21256.8	23777.2	33283.5	23706.8	23628.5	39263.7		14.3756	14.5373	15.0225	14.533	14.5282	15.2609		14.6451		-0.269512	-0.107858	0.377369	-0.112134	-0.116907	0.615759
30190217	1	20488.8	19808.9	34530.1	20734.6	21460.3	37098.5		14.3226	14.2739	15.0756	14.3398	14.3894	15.1791		14.5573		-0.234777	-0.283463	0.51824	-0.217574	-0.167944	0.621746
30190217	1	27120.6	33476.9	39213.6	49512.4	42092.3	56946.5		14.7271	15.0309	15.2591	15.5955	15.3613	15.7973		15.0057		-0.278581	0.025196	0.253385	0.58982	0.355587	0.791638
30190219	1	12887.9	2198.97	6458.82	2893.85	16182	5005.87		13.6537	11.1026	12.6571	11.4988	13.9821	12.2894		12.4711		1.18259	-1.36852	0.185923	-0.972359	1.51097	-0.181727
30190246	1	2777.96	2634.16	4586.65	5250.05	4626.7	5693.56		11.4398	11.3631	12.1632	12.3581	12.1758	12.4751		11.6554		-0.215578	-0.292261	0.507839	0.702729	0.520383	0.819728
30190246	1	4597.68	3904.28	6252.53	6297.82	4850.66	7422.45		12.1667	11.9308	12.6102	12.6206	12.244	12.8577		12.2359		-0.0692284	-0.305078	0.374307	0.384718	0.0080456	0.621762
30190246	1	9804.21	9276.66	15949.9	12212.1	11049.4	12400.6		13.2592	13.1794	13.9613	13.576	13.4317	13.5981		13.4666		-0.207426	-0.287222	0.494648	0.109418	-0.0349366	0.131511
30190246	1	77099.9	82438.1	111601	134082	113207	122200		16.2344	16.331	16.768	17.0328	16.7886	16.8989		16.4445		-0.210046	-0.113463	0.323509	0.588269	0.344119	0.454398
30190246	1	143290	181217	341784	297775	258279	363707		17.1286	17.4674	18.3827	18.1839	17.9786	18.4724		17.6596		-0.530976	-0.192193	0.723169	0.524308	0.319016	0.812862
30190258	1	23943.5	40338.1	51074	50320	55709	64438.5		14.5473	15.2999	15.6403	15.6188	15.7656	15.9756		15.1625		-0.615153	0.137353	0.4778	0.456343	0.60312	0.813134
30190291	1	1216.85	963.391	1750.74	1471.57	1667.67	2301.77		10.2489	9.91198	10.7738	10.5231	10.7036	11.1685		10.3116		-0.0626186	-0.399578	0.462197	0.211583	0.392062	0.856971
30190291	1	1589.72	1194.63	2251.54	2352.15	1903.98	1623.84		10.6346	10.2223	11.1367	11.1998	10.8948	10.6652		10.6645		-0.0299758	-0.442188	0.472163	0.535228	0.230271	0.000661467
30190291	1	10840.5	21714.2	18925.7	15824.4	29868.3	17424.1		13.4041	14.4063	14.2081	13.9499	14.8663	14.0888		14.0062		-0.602039	0.400165	0.201874	-0.0563182	0.860143	0.0826112
30190307	1	11254	3769.14	6965.19	4757.33	4772.56	5892.53		13.4581	11.88	12.7659	12.2159	12.2205	12.5247		12.7014		0.756775	-0.821351	0.0645757	-0.485434	-0.480824	-0.176699
30190307	1	40580.8	18016	23841.9	21365.8	26878.2	32216.4		15.3085	14.137	14.5412	14.383	14.7142	14.9755		14.6622		0.646272	-0.525245	-0.121027	-0.279218	0.0519143	0.313272
30190313	1	9114.72	9688.78	10910.2	11839.3	10439.4	15756.7		13.154	13.2421	13.4134	13.5313	13.3498	13.9437		13.2698		-0.115839	-0.0277238	0.143563	0.261475	0.0799306	0.673856
30190313	1	9690.56	15245.7	13738.3	12108.4	14310	16852.1		13.2424	13.8961	13.7459	13.5637	13.8047	14.0406		13.6281		-0.385767	0.267982	0.117785	-0.0644129	0.176604	0.412505
30190313	1	13622	19316.7	21264.5	19715.3	20784.7	21973.5		13.7337	14.2376	14.3762	14.267	14.3432	14.4235		14.1158		-0.382138	0.121771	0.260368	0.151235	0.227445	0.307687
30190341	1	2203.21	2945.72	3535.67	5700	4775.83	4495.64		11.1054	11.5244	11.7878	12.4767	12.2215	12.1343		11.4725		-0.367131	0.0518856	0.315246	1.00423	0.749015	0.66179
30190341	1	3096.69	4655.41	4331.63	3891.98	6570	6165.85		11.5965	12.1847	12.0807	11.9263	12.6817	12.5901		11.954		-0.357457	0.230728	0.126728	-0.027677	0.727711	0.636119
30190341	1	3367.3	6450.33	6669	6853.37	6606.35	8387.54		11.7174	12.6552	12.7033	12.7426	12.6896	13.034		12.3586		-0.641219	0.29656	0.344659	0.384001	0.331041	0.675435
30190341	1	6261.4	9213.85	12930.6	13001.6	12054.2	14171.9		12.6123	13.1696	13.6585	13.6664	13.5572	13.7907		13.1468		-0.534517	0.0228027	0.511714	0.519617	0.41046	0.643958
30190353	1	18313.7	11233.7	17153.6	12578.2	19457.2	16229.2		14.1606	13.4555	14.0662	13.6186	14.248	13.9863		13.8941		0.266497	-0.438588	0.172091	-0.275501	0.353885	0.0921709
30190353	1	34359.8	69283.6	67013.5	91419.6	98913.8	83574.1		15.0684	16.0802	16.0322	16.4802	16.5939	16.3508		15.7269		-0.658508	0.353285	0.305223	0.753275	0.866944	0.623829
30190353	1	80517.3	131946	148063	187050	214527	187219		16.297	17.0096	17.1759	17.5131	17.7108	17.5144		16.8275		-0.530475	0.182106	0.348369	0.685581	0.88331	0.686884
30190366	1	2048.44	6951.03	5603.29	7363.14	12022.5	3999.73		11.0003	12.763	12.4521	12.8461	13.5534	11.9657		12.0718		-1.07148	0.691218	0.380264	0.774312	1.48166	-0.106108
30190366	1	12707.6	14299.3	15126.8	20054.9	15547.8	18898.8		13.6334	13.8037	13.8848	14.2917	13.9244	14.206		13.774		-0.140558	0.0296977	0.11086	0.517702	0.150456	0.432043
30190366	1	9555.53	15582.8	15293.9	25476.5	17269	31732.6		13.2221	13.9277	13.9007	14.6369	14.0759	14.9537		13.6835		-0.461366	0.244182	0.217184	0.953391	0.392411	1.27019
30190366	1	13214.9	21492.6	21672.2	32189.2	24006.5	33495.4		13.6899	14.3916	14.4036	14.9743	14.5511	15.0317		14.1617		-0.471786	0.229888	0.241898	0.812626	0.389473	0.870012
30190366	1	26912.4	78191.5	82432.8	113217	105468	63446.4		14.716	16.2547	16.3309	16.7887	16.6864	15.9533		15.7672		-1.05123	0.487511	0.563717	1.02152	0.919227	0.186038
30190366	1	62946.5	127678	183416	181675	166282	204538		15.9418	16.9622	17.4848	17.471	17.3433	17.642		16.7962		-0.85441	0.165901	0.688509	0.67475	0.547026	0.845759
30190366	1	113672	286501	312559	328376	373350	376506		16.7945	18.1282	18.2538	18.325	18.5102	18.5223		17.7255		-0.930975	0.402693	0.528282	0.599501	0.784681	0.796827
30190373	1	9429.43	17900.9	20818.6	16772	14332.9	17583.8		13.203	14.1277	14.3456	14.0338	13.807	14.102		13.8921		-0.689141	0.23565	0.453491	0.141674	-0.0850522	0.209862
30190373	1	18131.9	31232	34923	33450.6	30819.8	38778.6		14.1462	14.9307	15.0919	15.0297	14.9116	15.243		14.723		-0.576715	0.207781	0.368935	0.30679	0.188615	0.520018
30190422	1	12619.2	15462.9	13865.5	14523.8	14421.8	15125.9		13.6233	13.9165	13.7592	13.8261	13.816	13.8847		13.7664		-0.143024	0.150164	-0.00714005	0.0597761	0.0496102	0.11838
30190422	1	33109.3	36021.4	38800.4	36836.1	44759.1	57369.2		15.0149	15.1366	15.2438	15.1688	15.4499	15.808		15.1318		-0.116817	0.00479989	0.112017	0.0370661	0.318128	0.676223
30190422	1	53134.6	66771.1	70398.3	61025.9	89969.7	49562		15.6974	16.0269	16.1033	15.8971	16.4572	15.5969		15.9425		-0.245154	0.0844187	0.160735	-0.045385	0.514633	-0.345571
30190422	1	39690	73255.5	59682.5	64374.2	76106.7	57182.9		15.2765	16.1606	15.865	15.9742	16.2157	15.8033		15.7674		-0.490899	0.393264	0.0976345	0.206809	0.44835	0.0359098
30190435	1	3008.49	3312.31	3298.79	4096.76	3487.77	5324.57		11.5548	11.6936	11.6877	12.0003	11.7681	12.3784		11.6454		-0.0905665	0.0482336	0.0423329	0.354878	0.122699	0.733059
30190435	1	5625.55	3083.44	5939.14	5965.9	3945.7	7493.13		12.4578	11.5903	12.536	12.5425	11.9461	12.8714		12.1947		0.263065	-0.60439	0.341325	0.347811	-0.248647	0.676639
30190435	1	2700.73	3535.3	3642.91	3858.13	4981.83	4946.01		11.3991	11.7876	11.8309	11.9137	12.2825	12.272		11.6725		-0.27341	0.115075	0.158335	0.241145	0.609919	0.599508
30190435	1	3432.6	3935.82	5291.19	4937.33	6962.5	6261.35		11.7451	11.9424	12.3694	12.2695	12.7654	12.6123		12.019		-0.273884	-0.0765223	0.350407	0.250547	0.746419	0.593288
30190435	1	2709.46	3791.93	5541.75	5719.57	6040.47	7456.83		11.4038	11.8887	12.4361	12.4817	12.5604	12.8643		11.9095		-0.505756	-0.0208268	0.526583	0.572148	0.650902	0.954803
30190435	1	3609.47	3118.73	4963.53	4051.64	6075.61	4584.28		11.8176	11.6067	12.2772	11.9843	12.5688	12.1625		11.9005		-0.0829156	-0.293747	0.376662	0.0838004	0.668326	0.261991
30190435	1	4738.92	3461.19	5112.21	4060.5	7621.14	6799.9		12.2103	11.7571	12.3197	11.9874	12.8958	12.7313		12.0957		0.114634	-0.338656	0.224023	-0.108268	0.800082	0.635588
30190435	1	4146.18	5242.37	5071.91	4074.12	4619.23	5153.99		12.0176	12.356	12.3083	11.9923	12.1734	12.3315		12.2273		-0.209728	0.128709	0.081019	-0.235022	-0.0538577	0.10418
30190435	1	4950.62	4356.09	8399.96	5817.93	6336.16	8801.01		12.2734	12.0888	13.0362	12.5063	12.6294	13.1035		12.4661		-0.192733	-0.377309	0.570042	0.0401632	0.163267	0.637328
30190435	1	10458	6439.66	9879.67	9720	7778.72	11017.8		13.3523	12.6528	13.2702	13.2467	12.9253	13.4276		13.0918		0.260543	-0.43901	0.178468	0.154961	-0.166461	0.335771
30190435	1	12585.4	12143.6	20560.2	17505.3	20243.3	18833.3		13.6195	13.5679	14.3276	14.0955	14.3052	14.201		13.8383		-0.218846	-0.270404	0.48925	0.257193	0.466839	0.362682
30190435	1	88759.8	114487	156681	182643	181542	203447		16.4376	16.8048	17.2575	17.4787	17.4699	17.6343		16.8333		-0.395685	-0.0284816	0.424167	0.645362	0.63664	0.800989
30190444	1	6069.86	10386.5	11095.2	10336.9	13464.4	11619.8		12.5674	13.3424	13.4376	13.3355	13.7169	13.5043		13.1158		-0.54839	0.226583	0.321807	0.219677	0.601028	0.388457
30190444	1	24546.8	28110.7	42222	36770.6	40649	39946.4		14.5832	14.7788	15.3657	15.1663	15.3109	15.2858		14.9093		-0.326017	-0.130428	0.456445	0.257005	0.401671	0.376515
30190455	1	4408.47	1374.12	2671.17	716.73	2905.08	2650.24		12.1061	10.4243	11.3833	9.48529	11.5044	11.3719		11.3045		0.801525	-0.880244	0.0787198	-1.81925	0.199825	0.0673707
30190455	1	6007.5	2416.41	3165.05	1888.42	3423.01	3471.89		12.5525	11.2386	11.628	10.883	11.7411	11.7615		11.8064		0.746146	-0.567754	-0.178391	-0.923438	-0.065351	-0.0448963
30190464	1	20155.6	21716.6	27999.1	24942.1	28347.4	28083.8		14.2989	14.4065	14.7731	14.6063	14.7909	14.7775		14.4928		-0.19394	-0.0863187	0.280259	0.113461	0.298098	0.28462
30190464	1	22046.9	22034.3	31242.9	32405.6	24544.1	36530.1		14.4283	14.4275	14.9312	14.984	14.5831	15.1568		14.5957		-0.167373	-0.168202	0.335576	0.388291	-0.0125763	0.561131
30190464	1	23105.3	32627.8	39029.7	42589.1	33782.2	43120.3		14.4959	14.9938	15.2523	15.3782	15.044	15.3961		14.914		-0.418076	0.0798027	0.338273	0.464183	0.129964	0.482066
30190464	1	32396.1	42479.8	47536	48441.8	43672.2	55276.7		14.9835	15.3745	15.5367	15.564	15.4144	15.7544		15.2983		-0.314719	0.0762382	0.238481	0.265712	0.116175	0.456133
30190464	1	43447.5	59927.5	68149.8	82069.6	66087.7	75500.1		15.407	15.8709	16.0564	16.3246	16.0121	16.2042		15.7781		-0.371128	0.0928181	0.27831	0.546449	0.233982	0.426078
30190464	1	60695.5	58208.4	66404.9	82658.2	91604.4	76429.8		15.8893	15.8289	16.019	16.3349	16.4831	16.2218		15.9124		-0.0231128	-0.0834745	0.106587	0.422455	0.570715	0.309433
30190504	1	14792.9	19686.6	19871	21325.4	19150.5	24834.7		13.8526	14.2649	14.2784	14.3803	14.2251	14.6001		14.132		-0.279359	0.132954	0.146404	0.248312	0.0931237	0.468095
30190504	1	26569.1	34418.7	34383.7	43821.4	41542.9	41112.1		14.6975	15.0709	15.0694	15.4193	15.3423	15.3273		14.9459		-0.248471	0.124969	0.123502	0.473413	0.396379	0.38134
30190514	1	1194.62	691.768	2513.84	886.572	2406.7	1953.86		10.2223	9.43415	11.2957	9.79209	11.2328	10.9321		10.3174		-0.0950472	-0.883243	0.978291	-0.525294	0.915453	0.614726
30190514	1	2328.21	4883.25	5677.53	3846.95	6607.93	5634.67		11.185	12.2536	12.471	11.9095	12.69	12.4601		11.9699		-0.784885	0.283732	0.501153	-0.0603948	0.720089	0.490223
30190514	1	6089.25	4358.31	8222.91	5209.29	5614.62	7342.07		12.572	12.0896	13.0054	12.3469	12.455	12.842		12.5557		0.0163707	-0.466126	0.449755	-0.208806	-0.100705	0.286293
30190514	1	16646.9	20785.8	35623.1	33394.7	25041.2	42459.6		14.023	14.3433	15.1205	15.0273	14.612	15.3738		14.4956		-0.472637	-0.152287	0.624924	0.531729	0.116414	0.878202
30190514	1	22762.3	22752.3	34983	31200.9	30828.5	44767.1		14.4744	14.4737	15.0944	14.9293	14.912	15.4502		14.6808		-0.206458	-0.207093	0.413551	0.248482	0.231159	0.769335
30190514	1	33532.2	33181.6	41572.9	36676.9	27004.9	68305.9		15.0333	15.0181	15.3434	15.1626	14.7209	16.0597		15.1316		-0.0983091	-0.113475	0.211784	0.0310148	-0.410639	0.928152
30190514	1	29647.8	42288.9	55986.1	58611.5	45407.4	66700.8		14.8556	15.368	15.7728	15.8389	15.4706	16.0254		15.3321		-0.476497	0.0358533	0.440644	0.506758	0.138503	0.693279
30190514	1	43032.6	63801.3	103677	88155.5	76283.8	92620.3		15.3931	15.9613	16.6617	16.4278	16.2191	16.499		16.0054		-0.612248	-0.0440935	0.656342	0.422371	0.213697	0.493649
30190514	1	75402.1	65315.6	110070	77797.3	91585.1	100154		16.2023	15.9951	16.7481	16.2474	16.4828	16.6119		16.3152		-0.112856	-0.320032	0.432888	-0.0677396	0.167654	0.296685
30190514	1	151985	272821	366060	380662	280184	380584		17.2136	18.0576	18.4817	18.5382	18.096	18.5379		17.9176		-0.704061	0.139966	0.564095	0.620525	0.178388	0.620229
30190529	1	3539.41	4212.48	5047.55	6778.48	6916.15	6890.34		11.7893	12.0405	12.3014	12.7267	12.7558	12.7504		12.0437		-0.254411	-0.00325162	0.257663	0.683041	0.712049	0.706653
30190529	1	15604.6	16713.1	20815.1	23824.4	23988.2	26456.6		13.9297	14.0287	14.3453	14.5402	14.55	14.6913		14.1012		-0.171554	-0.0725474	0.244102	0.438914	0.448795	0.590098
30190529	1	18258	24191.1	22922.7	27717.5	29496.9	29740.9		14.1562	14.5622	14.4845	14.7585	14.8483	14.8602		14.401		-0.244735	0.161219	0.0835164	0.357537	0.447304	0.45919
30190529	1	21292.7	18269.3	28799.2	35043.8	31485.4	43695		14.3781	14.1571	14.8137	15.0969	14.9424	15.4152		14.4496		-0.0715779	-0.292512	0.36409	0.647221	0.492746	0.965531
30190529	1	28886.6	28860.9	42696.3	46536.5	40976.3	57218.3		14.8181	14.8168	15.3818	15.5061	15.3225	15.8042		15.0056		-0.187476	-0.18876	0.376236	0.500488	0.316916	0.798602
30190533	1	6758.42	8223.18	11096.8	10527	9496.13	13280.2		12.7225	13.0055	13.4378	13.3618	13.2131	13.697		13.0553		-0.332798	-0.0497853	0.382583	0.306544	0.157858	0.641724
30190533	1	8002.28	11175.4	17556.5	13564.1	12095.6	16110.5		12.9662	13.448	14.0997	13.7275	13.5622	13.9757		13.5047		-0.538456	-0.0566149	0.595071	0.22285	0.0575429	0.471064
30190533	1	74411.7	49379.1	67769	55577.8	69129.6	64044.8		16.1832	15.5916	16.0483	15.7622	16.077	15.9668		15.9411		0.242177	-0.349452	0.107275	-0.178843	0.135952	0.0257301
30190575	1	4631.6	3227.95	4700.32	6009.46	6304.32	6037.34		12.1773	11.6564	12.1985	12.553	12.6221	12.5597		12.0107		0.166547	-0.354343	0.187796	0.542272	0.611378	0.54895
30190575	1	12168.1	10770.7	16445.5	16065.9	13118.4	15703.6		13.5708	13.3948	14.0054	13.9717	13.6793	13.9388		13.657		-0.0861948	-0.262192	0.348387	0.314701	0.0222905	0.281795
30190575	1	16537.9	13058.8	18968.4	17949.6	15298.8	19334		14.0135	13.6727	14.2113	14.1317	13.9011	14.2389		13.9658		0.0476415	-0.293109	0.245468	0.165816	-0.0647122	0.273006
30190575	1	16070.9	14406	23251.3	20023.9	21229.1	22242.3		13.9722	13.8144	14.505	14.2894	14.3738	14.441		14.0972		-0.125025	-0.282809	0.407833	0.19225	0.27657	0.34383
30190575	1	20584.1	20123.3	24907	27768.4	24726.9	30714.7		14.3292	14.2966	14.6043	14.7612	14.5938	14.9066		14.41		-0.0807841	-0.113449	0.194234	0.351128	0.183764	0.49661
30190587	1	17743.1	9278.9	16496.7	8856.2	11214.9	14581.2		14.115	13.1797	14.0099	13.1125	13.4531	13.8318		13.7682		0.346771	-0.58846	0.241688	-0.655725	-0.31507	0.0636272
30190587	1	15067.7	11472.1	11223.4	11774.1	15637.2	13263.8		13.8792	13.4858	13.4542	13.5233	13.9327	13.6952		13.6064		0.272756	-0.120568	-0.152188	-0.0830847	0.326278	0.088796
30190591	1	6669.19	5795.57	8506.56	6642.22	6064.43	6069.3		12.7033	12.5007	13.0544	12.6975	12.5662	12.5673		12.7528		-0.049501	-0.252063	0.301564	-0.0553472	-0.18664	-0.185482
30190603	1	3564.95	6246.81	6420.65	9897.37	11449.5	2049.67		11.7997	12.6089	12.6485	13.2728	13.483	11.0012		12.3524		-0.552692	0.256546	0.296146	0.920471	1.13064	-1.35118
30190603	1	4175.31	11097.6	5792.77	10532.4	18728.2	3213.06		12.0277	13.438	12.5	13.3625	14.1929	11.6497		12.6552		-0.627551	0.782734	-0.155183	0.707326	1.53771	-1.00549
30190603	1	3756.54	4327.76	5730.65	6860.75	5060.71	6863.58		11.8752	12.0794	12.4845	12.7442	12.3051	12.7447		12.1464		-0.27117	-0.0669544	0.338124	0.597793	0.158766	0.598388
30190603	1	10129.6	13680.5	16655.2	15400.2	14185.9	19664.2		13.3063	13.7398	14.0237	13.9107	13.7922	14.2633		13.6899		-0.383648	0.0498983	0.33375	0.220731	0.102235	0.573352
30190603	1	8833.1	13595.1	14147.1	16785.3	14737.2	14341.1		13.1087	13.7308	13.7882	14.0349	13.8472	13.8079		13.5426		-0.433872	0.188226	0.245646	0.492332	0.304594	0.265294
30190603	1	12576.7	15444.5	17217.6	16754.8	17231.1	18385.5		13.6185	13.9148	14.0716	14.0323	14.0727	14.1663		13.8683		-0.249824	0.0465186	0.203306	0.163994	0.204435	0.297991
30190603	1	31846.3	28507.2	39162.2	36456.6	38016.8	45089.3		14.9588	14.799	15.2572	15.1539	15.2143	15.4605		15.005		-0.0461779	-0.205979	0.252157	0.148876	0.209332	0.455479
30190603	1	40584.4	45212.9	55565.5	54847.2	53299.4	69342.5		15.3086	15.4644	15.7619	15.7431	15.7018	16.0815		15.5117		-0.203024	-0.0472146	0.250239	0.231467	0.190169	0.56979
30190603	1	63187.8	86659.1	104435	109708	106107	133475		15.9474	16.4031	16.6723	16.7433	16.6952	17.0262		16.3409		-0.393533	0.0621723	0.331361	0.402419	0.35427	0.685316
30190611	1	30894.3	26890.3	26264.9	40815.7	52305.6	47281.8		14.9151	14.7148	14.6809	15.3168	15.6747	15.529		14.7702		0.144817	-0.0554339	-0.0893832	0.546603	0.904444	0.758764
30190667	1	3281.25	1198.8	1200.01	1619.69	1392.79	2289.76		11.68	10.2274	10.2288	10.6615	10.4438	11.161		10.7121		0.967951	-0.4847	-0.483251	-0.0505794	-0.268321	0.448904
30190667	1	4470.73	2448.55	3455.75	4330.25	2520.05	4828.01		12.1263	11.2577	11.7548	12.0802	11.2992	12.2372		11.7129		0.413365	-0.455219	0.0418539	0.367306	-0.413693	0.524284
30190667	1	4224.08	4262.91	3795.55	5277.16	3901.33	6344.01		12.0444	12.0576	11.8901	12.3655	11.9297	12.6312		11.9974		0.0470431	0.060242	-0.107285	0.368165	-0.0676307	0.6338
30190667	1	6132.89	6031.09	7436.83	6236.08	5490.92	8104.29		12.5824	12.5582	12.8605	12.6064	12.4228	12.9845		12.667		-0.0846569	-0.108806	0.193463	-0.0605858	-0.244177	0.317462
30190667	1	10291.3	4492.74	5809.41	7916.45	10769.5	7097.34		13.3291	12.1334	12.5042	12.9506	13.3947	12.7931		12.6556		0.673577	-0.522186	-0.151391	0.295071	0.739099	0.137496
30190667	1	10822.3	7690.63	11687.7	14059.7	9920.96	16367.5		13.4017	12.9089	13.5127	13.7793	13.2763	13.9985		13.2744		0.127282	-0.365551	0.238269	0.504845	0.00182754	0.724111
30190667	1	23210.6	17043.7	27453.2	24243.5	19775.5	29461.6		14.5025	14.057	14.7447	14.5653	14.2714	14.8465		14.4347		0.0677824	-0.377759	0.309976	0.130599	-0.163282	0.411837
30190667	1	19533	13119.7	23380.5	24386.3	22029.8	26165.7		14.2536	13.6794	14.513	14.5738	14.4272	14.6754		14.1487		0.104932	-0.469253	0.364321	0.425085	0.27847	0.526694
30190667	1	19162.3	18609.4	25928.7	30568.4	22763.9	30399.5		14.226	14.1837	14.6623	14.8998	14.4745	14.8918		14.3573		-0.131346	-0.173586	0.304931	0.54242	0.11713	0.534426
30190667	1	17454.5	15878.9	23930.1	23589.9	17818.6	24224.6		14.0913	13.9548	14.5465	14.5259	14.1211	14.5642		14.1976		-0.106245	-0.242736	0.348981	0.328323	-0.0764568	0.36663
30190667	1	24163.9	16085.2	31838	22199	24877.9	27479.4		14.5606	13.9734	14.9585	14.4382	14.6026	14.7461		14.4975		0.0630753	-0.524047	0.460972	-0.0592843	0.105088	0.248572
30190667	1	28458.3	21402.9	24854.5	31288.4	23905.8	35143		14.7966	14.3855	14.6012	14.9333	14.5451	15.1009		14.5944		0.20213	-0.208918	0.00678728	0.338906	-0.0493579	0.506516
30190667	1	44703.7	29626.4	60318	48684.7	41104.7	67924.7		15.4481	14.8546	15.8803	15.5712	15.327	16.0516		15.3943		0.053771	-0.539737	0.485966	0.176846	-0.067317	0.657315
30190667	1	96522.9	81419.7	96532.2	110644	76839.7	128401		16.5586	16.3131	16.5587	16.7556	16.2296	16.9703		16.4768		0.081785	-0.163709	0.0819239	0.278772	-0.247234	0.493498
30190667	1	297464	230859	295087	360686	259456	356303		18.1824	17.8166	18.1708	18.4604	17.9851	18.4427		18.0566		0.125761	-0.239946	0.114185	0.403786	-0.0714648	0.386148
30190667	1	944029	603632	1.02887e+06	956865	835438	1.29602e+06		19.8485	19.2033	19.9726	19.868	19.6722	20.3057		19.6748		0.173667	-0.471494	0.297827	0.193152	-0.00263059	0.630858
30190683	1	5222.4	3367.26	7911.61	6352.66	5371.99	8339.04		12.3505	11.7174	12.9498	12.6331	12.3912	13.0257		12.3392		0.0112926	-0.621843	0.61055	0.293942	0.0520358	0.686462
30190683	1	4203.24	6280.51	6547.38	6046.53	5517.78	8360.2		12.0373	12.6167	12.6767	12.5619	12.4299	13.0293		12.4436		-0.406265	0.173115	0.23315	0.11834	-0.0136799	0.585771
30190683	1	7199.57	5447.81	8717.59	8999.02	6826.81	8886.86		12.8137	12.4115	13.0897	13.1356	12.737	13.1175		12.7716		0.0420715	-0.360162	0.31809	0.363929	-0.0346267	0.345836
30190683	1	6029.8	6909.14	6948.74	9090.57	6088.25	9864.15		12.5579	12.7543	12.7625	13.1502	12.5718	13.268		12.6916		-0.133678	0.0627159	0.0709624	0.458581	-0.119761	0.576405
30190683	1	7472.81	4744.08	9875.16	8781.07	5471.39	9454.61		12.8674	12.2119	13.2696	13.1002	12.4177	13.2068		12.783		0.0844577	-0.571067	0.486609	0.317202	-0.365286	0.423824
30190683	1	6358.6	7390.4	15413.5	13153.2	9545.38	15355.3		12.6345	12.8514	13.9119	13.6831	13.2206	13.9065		13.1326		-0.498119	-0.281176	0.779295	0.550514	0.0879748	0.773838
30190683	1	7548.65	8100.63	14049.9	12506.7	12166.9	14245		12.882	12.9838	13.7783	13.6104	13.5707	13.7982		13.2147		-0.332695	-0.230879	0.563574	0.395717	0.355982	0.58347
30190683	1	10512.6	12763.1	15584.9	17139.3	14491.7	16506.1		13.3598	13.6397	13.9279	14.065	13.8229	14.0107		13.6425		-0.282636	-0.0027681	0.285404	0.42256	0.180481	0.368247
30190683	1	13013.3	14633.7	14282.6	12908.4	14180.7	16809.4		13.6677	13.837	13.802	13.656	13.7916	14.037		13.7689		-0.101196	0.0681141	0.0330816	-0.112866	0.0227438	0.268089
30190683	1	13554.7	15524.4	18571.2	17453.7	20154	21266.2		13.7265	13.9222	14.1808	14.0912	14.2988	14.3763		13.9432		-0.216669	-0.0209318	0.237601	0.148067	0.355597	0.433094
30190683	1	17209.3	12549.7	14965.7	13533.6	23606.4	15945.3		14.0709	13.6154	13.8694	13.7243	14.5269	13.9608		13.8519		0.219022	-0.236513	0.017491	-0.127614	0.675013	0.108967
30190683	1	32372.2	35357.6	61098.8	57317.3	43593	56191.7		14.9825	15.1097	15.8989	15.8067	15.4118	15.7781		15.3304		-0.347884	-0.220621	0.568505	0.47633	0.0814583	0.447716
30190683	1	61719.4	52981.1	72934.5	75920.1	54691.5	89212.6		15.9134	15.6932	16.1543	16.2122	15.739	16.445		15.9203		-0.00687622	-0.227124	0.234	0.291882	-0.181284	0.524646
30190683	1	63849.1	75633.6	117333	92723.9	80316.5	122553		15.9624	16.2067	16.8402	16.5007	16.2934	16.903		16.3365		-0.374076	-0.129716	0.503792	0.164198	-0.0430472	0.566589
30190683	1	117167	84961.2	115409	148015	110666	136447		16.8382	16.3745	16.8164	17.1754	16.7559	17.058		16.6764		0.161832	-0.301857	0.140025	0.499012	0.0794784	0.381611
30190683	1	117439	112502	155081	164328	154996	129654		16.8416	16.7796	17.2427	17.3262	17.2419	16.9843		16.9546		-0.113052	-0.17501	0.288062	0.371614	0.287264	0.0297052
30190683	1	117079	116905	184106	177622	134715	199535		16.8371	16.835	17.4902	17.4384	17.0395	17.6063		17.0541		-0.216971	-0.219113	0.436084	0.384357	-0.014544	0.552188
30190713	1	11815.6	9959.55	17845.2	12954.9	15375.9	17949.3		13.5284	13.2819	14.1232	13.6612	13.9084	14.1316		13.6445		-0.116099	-0.362642	0.478741	0.0167028	0.26388	0.487132
30190714	1	7805.19	7247.08	10627.1	6733.46	11007.8	8259.03		12.9302	12.8232	13.3755	12.7171	13.4262	13.0118		13.043		-0.112739	-0.219772	0.33251	-0.325824	0.383286	-0.0311999
30190714	1	11238.2	11090.3	17032.4	13169	15131.8	14830.9		13.4561	13.437	14.056	13.6849	13.8853	13.8563		13.6497		-0.193584	-0.2127	0.406284	0.0351467	0.235586	0.206608
30190714	1	16754.2	13356.8	20407.6	15222.7	24660.5	17030.9		14.0322	13.7053	14.3168	13.8939	14.5899	14.0559		14.0181		0.0141208	-0.312824	0.298703	-0.124175	0.571803	0.037751
30190714	1	17352.4	18806.8	22792.3	20671.7	28087.9	19328.9		14.0828	14.199	14.4763	14.3354	14.7777	14.2385		14.2527		-0.169844	-0.0537238	0.223567	0.0826777	0.52497	-0.0142174
30190714	1	23749.2	24869.6	34053.1	20779.8	30525.2	19907.1		14.5356	14.6021	15.0555	14.3429	14.8977	14.281		14.7311		-0.195468	-0.128968	0.324436	-0.388165	0.166652	-0.450067
30190714	1	28819	28048.8	34769.2	37774.2	42792.5	48838		14.8147	14.7756	15.0855	15.2051	15.3851	15.5757		14.892		-0.0772345	-0.116319	0.193553	0.313145	0.493103	0.683748
30190714	1	28987.4	33219.2	48259.5	32535.8	53332.8	35446.4		14.8231	15.0197	15.5585	14.9897	15.7027	15.1134		15.1338		-0.31066	-0.114067	0.424727	-0.144056	0.568939	-0.0204473
30190715	1	10626.4	10844.2	11384.9	11747.9	15138.5	12765.2		13.3754	13.4046	13.4748	13.5201	13.8859	13.6399		13.4183		-0.0429117	-0.0136379	0.0565496	0.101832	0.467653	0.221649
30190739	1	4774.76	4316.29	5685.18	6081.58	5716.19	8108.19		12.2212	12.0756	12.473	12.5702	12.4808	12.9852		12.2566		-0.0353799	-0.181017	0.216397	0.313639	0.224245	0.728572
30190739	1	5466.32	4669.36	4573.16	4642.73	8004.37	6297.24		12.4164	12.189	12.159	12.1808	12.9666	12.6205		12.2548		0.161574	-0.0657709	-0.0958033	-0.0740213	0.711794	0.365726
30190739	1	8029.37	4006.55	5343.19	5958.64	7422.43	6660.36		12.9711	11.9681	12.3835	12.5408	12.8577	12.7014		12.4409		0.530171	-0.472755	-0.0574156	0.0998668	0.416776	0.260484
30190739	1	3040.35	3319.07	3299.61	5263.5	5464.52	6236.97		11.57	11.6966	11.6881	12.3618	12.4159	12.6066		11.6516		-0.0815328	0.0450093	0.0365235	0.710251	0.764323	0.955073
30190739	1	5646.28	3702.04	6504.61	4020.08	5749.26	6549.03		12.4631	11.8541	12.6672	11.973	12.4892	12.6771		12.3281		0.134939	-0.47404	0.339101	-0.355138	0.161015	0.34892
30190739	1	9416.15	10543.2	10231.3	12883.1	9780.61	13919.8		13.2009	13.364	13.3207	13.6532	13.2557	13.7649		13.2952		-0.0942946	0.0688065	0.0254882	0.357981	-0.0395068	0.469638
30190739	1	11364.1	8133.68	13842.9	12258.6	15099.5	13526.9		13.4722	12.9897	13.7569	13.5815	13.8822	13.7235		13.4062		0.0659463	-0.416555	0.350609	0.175263	0.475969	0.317293
30190739	1	8403.64	9151.51	7548.22	14292.6	20158.3	15463.2		13.0368	13.1598	12.8819	13.803	14.2991	13.9166		13.0262		0.0106268	0.133623	-0.14425	0.776812	1.27291	0.890379
30190739	1	17953.4	16140.4	17632.2	21082	20891.7	21410		14.132	13.9784	14.1059	14.3637	14.3506	14.386		14.0721		0.0598759	-0.0937079	0.033832	0.291631	0.27855	0.313903
30190739	1	20661.7	16421.1	26443.4	20832.4	25517.9	29296.2		14.3347	14.0033	14.6906	14.3465	14.6392	14.8384		14.3429		-0.00818109	-0.339589	0.34777	0.00368911	0.296369	0.495573
30190739	1	37706.8	35166.8	34972	32050.1	40392.8	36034.3		15.2025	15.1019	15.0939	14.968	15.3018	15.1371		15.1328		0.0697436	-0.0308651	-0.0388785	-0.164752	0.169017	0.0042894
30190774	1	35153.4	64179.8	61356.6	67119.7	58001.4	82411		15.1014	15.9698	15.9049	16.0344	15.8238	16.3305		15.6587		-0.557337	0.311119	0.246218	0.375736	0.165088	0.671835
30190780	1	2439.96	2670.61	2599.41	3502.21	2196.99	2081.58		11.2526	11.383	11.344	11.774	11.1013	11.0235		11.3265		-0.0738786	0.0564329	0.0174457	0.447526	-0.225207	-0.303058
30190822	1	6255.33	16610.7	12284	22910.8	22323.8	7313.27		12.6109	14.0198	13.5845	14.4837	14.4463	12.8363		13.4051		-0.794196	0.614764	0.179432	1.07868	1.04123	-0.568765
30190823	1	4037.09	4544.47	4922.48	5303.42	5292.93	7201.09		11.9791	12.1499	12.2652	12.3727	12.3699	12.814		12.1314		-0.152288	0.0185063	0.133782	0.241319	0.238463	0.68261
30190823	1	4361.05	6835.9	8995.72	6931.34	7742.28	10349.3		12.0905	12.7389	13.135	12.7589	12.9185	13.3373		12.6548		-0.564339	0.0841152	0.480224	0.104118	0.263743	0.682452
30190823	1	6767.43	7347.99	6131.77	8591.2	9356.94	10994.2		12.7244	12.8431	12.5821	13.0686	13.1918	13.4245		12.7165		0.00785437	0.126596	-0.13445	0.352106	0.475283	0.707918
30190823	1	7597.87	9367.85	10721.9	7427.88	11820.8	11487.3		12.8914	13.1935	13.3883	12.8587	13.529	13.4878		13.1577		-0.266341	0.0357825	0.230559	-0.298984	0.371314	0.330033
30190823	1	12947.9	10948.1	14510.6	14869.8	16677.1	18530.2		13.6604	13.4184	13.8248	13.8601	14.0256	14.1776		13.6345		0.025879	-0.216155	0.190276	0.225548	0.391036	0.543047
30190823	1	11916.9	13466.1	17124.3	18851.1	15221.7	23794.4		13.5407	13.717	14.0638	14.2024	13.8938	14.5383		13.7738		-0.233123	-0.0567974	0.28992	0.428525	0.120005	0.764497
30190858	1	841.195	2828.8	2216.21	2658.72	2969.4	3247.13		9.7163	11.466	11.1139	11.3765	11.536	11.665		10.7654		-1.04909	0.700591	0.348496	0.61113	0.770569	0.899567
30190858	1	3434.9	4115.38	3985.77	5070.64	5490.06	3739.78		11.7461	12.0068	11.9606	12.308	12.4226	11.8687		11.9045		-0.158449	0.102307	0.0561417	0.403451	0.518105	-0.0357642
30190858	1	2305.32	5008.08	6607.64	5387.69	6966.45	6096.18		11.1707	12.29	12.6899	12.3955	12.7662	12.5737		12.0502		-0.879488	0.239805	0.639683	0.345214	0.71597	0.523452
30190858	1	3956.35	5124.02	6978.21	6837.36	6843.81	8518.48		11.95	12.3231	12.7686	12.7392	12.7406	13.0564		12.3472		-0.397265	-0.0241585	0.421424	0.392006	0.393365	0.709162
30190858	1	6690.46	10911.3	9145.85	9896.59	7992.15	12376.8		12.7079	13.4135	13.1589	13.2727	12.9644	13.5953		13.0934		-0.385552	0.320093	0.0654593	0.179273	-0.129075	0.501903
30190858	1	19908.6	34487.4	37366.1	35447.3	40111.3	38567.7		14.2811	15.0738	15.1894	15.1134	15.2917	15.2351		14.8481		-0.567003	0.225669	0.341334	0.265276	0.44361	0.386994
30190876	1	3645.25	3178.08	4717.96	7137.15	6627.56	5988.65		11.8318	11.6339	12.2039	12.8011	12.6943	12.548		11.8899		-0.0580939	-0.255956	0.31405	0.911235	0.804366	0.658119
30190876	1	30101.9	30691.9	30574.9	35623.9	43509.7	39513.3		14.8776	14.9056	14.9001	15.1206	15.4091	15.2701		14.8944		-0.0168333	0.0111715	0.00566179	0.226159	0.514651	0.375651
30190876	1	30280.6	30588.9	34734.3	31713.9	37099.8	35717.6		14.8861	14.9007	15.0841	14.9528	15.1791	15.1243		14.957		-0.070861	-0.0562473	0.127108	-0.00413779	0.222159	0.167383
30190876	1	22803.3	34465	36406.5	44774.4	49822.7	35921.4		14.477	15.0728	15.1519	15.4504	15.6045	15.1326		14.9006		-0.423614	0.172276	0.251338	0.549816	0.703947	0.231986
30190876	1	53389.4	62972.3	64394.1	66604.2	86414.5	60073.1		15.7043	15.9424	15.9746	16.0233	16.399	15.8744		15.8738		-0.169513	0.0686502	0.100862	0.149547	0.525208	0.000651918
30190876	1	109550	165807	123059	163027	214437	119931		16.7412	17.3391	16.909	17.3148	17.7102	16.8718		16.9965		-0.255224	0.34269	-0.0874663	0.318296	0.713739	-0.124611
30190876	1	197773	297481	300403	301188	411000	304736		17.5935	18.1824	18.1965	18.2003	18.6488	18.2172		17.9908		-0.397334	0.191615	0.205719	0.209482	0.657959	0.226381
30190884	1	3393.55	3430.08	4207.4	5732.72	4673.36	6690.02		11.7286	11.744	12.0387	12.485	12.1902	12.7078		11.8371		-0.108527	-0.0930795	0.201606	0.647896	0.353135	0.870687
30190884	1	5464.2	4436.21	4466.89	4358.31	5721.78	6394.27		12.4158	12.1151	12.1251	12.0896	12.4822	12.6426		12.2187		0.197141	-0.103542	-0.0935992	-0.129102	0.263595	0.42391
30190908	1	2335.44	2669.82	3310.44	2254.07	2307.62	3383.66		11.1895	11.3825	11.6928	11.1383	11.1722	11.7244		11.4216		-0.232125	-0.0390782	0.271203	-0.283287	-0.249412	0.302766
30190908	1	2280.6	1631.13	2424.37	2159.58	2252.75	2585.28		11.1552	10.6717	11.2434	11.0765	11.1375	11.3361		11.0234		0.131781	-0.351759	0.219978	0.0531152	0.114055	0.312685
30190908	1	5217.32	5991.9	9140.84	6031.27	13949.6	2447.79		12.3491	12.5488	13.1581	12.5582	13.7679	11.2573		12.6853		-0.33624	-0.136537	0.472777	-0.127089	1.0826	-1.42807
30190908	1	2802.96	2925.91	4281.9	3715.18	3203.68	4984.14		11.4527	11.5147	12.064	11.8592	11.6455	12.2831		11.6771		-0.224411	-0.162479	0.386889	0.182067	-0.0316329	0.605982
30190908	1	5303.86	3786.62	5885.29	4190.76	7338.52	7154.91		12.3728	11.8867	12.5229	12.033	12.8413	12.8047		12.2608		0.112019	-0.374111	0.262092	-0.227811	0.580467	0.543912
30190908	1	11514.1	14375	15710.8	19161.2	20266.2	13626.5		13.4911	13.8113	13.9395	14.2259	14.3068	13.7341		13.7473		-0.256173	0.0639921	0.192181	0.47861	0.559503	-0.0131618
30190908	1	15261.6	19725	18891.5	15287.4	17522.9	19036.6		13.8976	14.2677	14.2055	13.9001	14.097	14.2165		14.1236		-0.225983	0.144134	0.0818496	-0.22355	-0.0266474	0.0928873
30190908	1	17843	20610.1	28821	30317.4	23611.3	25648.2		14.1231	14.3311	14.8148	14.8879	14.5272	14.6466		14.423		-0.299922	-0.0919246	0.391846	0.464872	0.104199	0.223581
30190908	1	27572.4	31983.8	49999.7	41277.9	52246.4	35104.7		14.7509	14.9651	15.6096	15.3331	15.673	15.0994		15.1085		-0.357604	-0.143486	0.501089	0.224542	0.564503	-0.00916609
30190971	1	23739.4	29678.5	30316.5	38118.9	49582.8	22024.4		14.535	14.8571	14.8878	15.2182	15.5976	14.4268		14.76		-0.224985	0.0971488	0.127837	0.458238	0.83757	-0.333165
30190971	1	74103.5	125107	93504.5	142086	157805	98641.3		16.1773	16.9328	16.5127	17.1164	17.2678	16.5899		16.5409		-0.36368	0.391867	-0.028187	0.575466	0.72685	0.0489698
30190982	1	11739.8	10360.6	17287.2	11280.9	20294.2	15105.7		13.5191	13.3388	14.0774	13.4616	14.3088	13.8828		13.6451		-0.126003	-0.306296	0.432299	-0.183521	0.663661	0.237691
30190984	1	3908.05	5189.84	7609.69	6952.86	4289.28	6391.67		11.9322	12.3415	12.8936	12.7634	12.0665	12.642		12.3891		-0.456876	-0.0476358	0.504512	0.37428	-0.322592	0.252866
30190984	1	6938.05	11829.3	8565	8382.07	10266.1	10298.2		12.7603	13.5301	13.0642	13.0331	13.3256	13.3301		13.1182		-0.357897	0.41187	-0.053973	-0.0851208	0.207392	0.211896
30190986	1	872.035	2105.05	3098.11	2188.15	2722.84	2538.93		9.76824	11.0396	11.5972	11.0955	11.4109	11.31		10.8017		-1.03344	0.237954	0.795488	0.29381	0.609213	0.508318
30190986	1	37784	44976	47548.5	44330.8	53192.4	45976.3		15.2055	15.4569	15.5371	15.436	15.6989	15.4886		15.3998		-0.194334	0.0570445	0.137289	0.0361979	0.299109	0.0887796
30190986	1	110556	150001	172001	136728	178427	132347		16.7544	17.1946	17.3921	17.0609	17.445	17.014		17.1137		-0.359275	0.0809167	0.278358	-0.0527458	0.331282	-0.0997343
30191049	1	24725.6	30064.7	44523.8	48498.1	51965.8	45679.8		14.5937	14.8758	15.4423	15.5656	15.6653	15.4793		14.9706		-0.376878	-0.0948149	0.471693	0.595045	0.69468	0.508673
30191141	1	3889.16	3141.65	6231.95	8605.7	6820.84	5074.87		11.9252	11.6173	12.6055	13.0711	12.7357	12.3092		12.0493		-0.124096	-0.432032	0.556128	1.02174	0.686394	0.259816
30191141	1	3639.97	2680.94	7057.38	9155.49	4496.71	7231.55		11.8297	11.3885	12.7849	13.1604	12.1347	12.8201		12.0011		-0.171339	-0.612527	0.783866	1.15937	0.133603	0.819039
30191141	1	3964.03	5491.83	5880.19	6985.89	6985.92	6624.74		11.9528	12.4231	12.5216	12.7702	12.7702	12.6936		12.2992		-0.346405	0.123916	0.22249	0.471072	0.471077	0.394491
30191141	1	4804.7	9988.2	13961	14572.3	12450.6	14634.9		12.2302	13.286	13.7691	13.8309	13.6039	13.8371		13.0951		-0.864889	0.19089	0.673998	0.735823	0.508804	0.742011
30191141	1	4281.01	5264.07	9852.62	7193.04	6547.53	10230.4		12.0637	12.362	13.2663	12.8124	12.6767	13.3206		12.564		-0.500262	-0.202033	0.702295	0.24839	0.11274	0.756574
30191141	1	5281.06	7345.86	9688.12	12254.3	11198.9	12893.4		12.3666	12.8427	13.242	13.581	13.4511	13.6543		12.8171		-0.450499	0.0256063	0.424892	0.763891	0.633955	0.83723
30191141	1	6344.6	6369.53	8837.12	9578.84	10901.7	10597.8		12.6313	12.637	13.1094	13.2256	13.4123	13.3715		12.7925		-0.161235	-0.155576	0.316812	0.433086	0.619721	0.578927
30191141	1	16181.4	13959.9	17933	12867.8	15348	19361.9		13.9821	13.769	14.1303	13.6515	13.9058	14.2409		13.9605		0.0215901	-0.191458	0.169868	-0.308977	-0.0547009	0.280475
30191141	1	12918.6	16176.4	13800.3	23357.2	17691.1	15612		13.6572	13.9816	13.7524	14.5116	14.1107	13.9304		13.7971		-0.139897	0.184547	-0.0446509	0.714523	0.313676	0.133309
30191141	1	18454.9	17973.7	21974	22964.9	19922.4	35096.2		14.1717	14.1336	14.4235	14.4871	14.2821	15.099		14.2429		-0.0712268	-0.109342	0.180569	0.244202	0.0391624	0.856085
30191141	1	20199.9	20934	29171.2	30100.8	32568	32798.1		14.3021	14.3536	14.8323	14.8775	14.9912	15.0013		14.496		-0.193901	-0.142397	0.336298	0.381554	0.495209	0.505365
30191141	1	20690.7	21788.2	28501.7	33521.8	34688.8	35011.4		14.3367	14.4113	14.7988	15.0328	15.0822	15.0955		14.5156		-0.178878	-0.104311	0.283189	0.51724	0.56661	0.579965
30191141	1	12978.6	15941	28906.3	28972.5	33654.3	27913.6		13.6639	13.9605	14.8191	14.8224	15.0385	14.7687		14.1478		-0.483951	-0.187342	0.671293	0.674594	0.890703	0.620878
30191141	1	10929.5	33919.9	48276.7	43371.1	47333.2	47134.3		13.4159	15.0498	15.559	15.4044	15.5306	15.5245		14.6749		-1.259	0.374903	0.884101	0.729508	0.855625	0.849551
30191141	1	28110.2	23182.2	40218.6	37125.3	33088.4	39151		14.7788	14.5007	15.2956	15.1801	15.014	15.2568		14.8584		-0.079564	-0.357639	0.437203	0.321746	0.155669	0.398392
30191141	1	24690.1	24832.8	53626.4	39985.8	35761.4	39271.3		14.5916	14.6	15.7107	15.2872	15.1261	15.2612		14.9674		-0.375775	-0.36746	0.743235	0.31978	0.158697	0.293767
30191141	1	28597.6	32096.9	43080.5	51530.6	44968	54761.8		14.8036	14.9701	15.3947	15.6531	15.4566	15.7409		15.0562		-0.252559	-0.0860216	0.338581	0.596976	0.400446	0.684717
30191141	1	39544.5	55690.6	85218.5	105319	102296	87320.3		15.2712	15.7651	16.3789	16.6844	16.6424	16.414		15.8051		-0.533882	-0.0399265	0.573808	0.879331	0.837325	0.608958
30191141	1	43106.7	46946.9	58298.8	84305.6	59639.4	81268.4		15.3956	15.5187	15.8312	16.3633	15.864	16.3104		15.5818		-0.186222	-0.0631073	0.249329	0.781493	0.28213	0.728558
30191141	1	41572.6	45596	65560.4	86481.3	69108.1	72817.4		15.3433	15.4766	16.0005	16.4001	16.0766	16.152		15.6068		-0.263489	-0.130214	0.393703	0.793266	0.469733	0.545161
30191141	1	40797.3	47255.9	58338.6	109010	68242.3	63605.3		15.3162	15.5282	15.8322	16.7341	16.0584	15.9569		15.5589		-0.242665	-0.030646	0.273311	1.17525	0.499527	0.398009
30191141	1	27763.9	37873.9	76603.7	71915.4	73431.7	71598.7		14.7609	15.2089	16.2251	16.134	16.1641	16.1276		15.3983		-0.637398	-0.189405	0.826803	0.73569	0.765792	0.729323
30191141	1	45991.5	48408.8	69356.2	80493.8	74096.9	85799.8		15.4891	15.563	16.0817	16.2966	16.1771	16.3887		15.7113		-0.222187	-0.148284	0.370471	0.585323	0.46586	0.677421
30191141	1	47698.7	45789.6	53710.8	75429.3	60939	76442		15.5417	15.4827	15.7129	16.2028	15.8951	16.2221		15.5791		-0.0374446	-0.096374	0.133819	0.623733	0.315972	0.642973
30191141	1	75399	106666	112965	181997	141888	123977		16.2023	16.7027	16.7855	17.4736	17.1144	16.9197		16.5635		-0.361248	0.13924	0.222008	0.910049	0.55089	0.356207
30191141	1	76718.9	94472.7	101952	161584	153223	129341		16.2273	16.5276	16.6375	17.3019	17.2253	16.9808		16.4641		-0.23685	0.0634648	0.173385	0.837778	0.761125	0.51667
30191141	1	59220.6	108838	151935	163294	181340	162447		15.8538	16.7318	17.2131	17.3171	17.4683	17.3096		16.5996		-0.745766	0.132246	0.613519	0.717534	0.868761	0.710032
30191141	1	78346.2	98018.1	123366	175504	154208	188248		16.2576	16.5808	16.9126	17.4211	17.2345	17.5223		16.5836		-0.326067	-0.00288081	0.328948	0.837506	0.65088	0.93863
30191141	1	91626.6	122201	170756	276146	197862	256732		16.4835	16.8989	17.3816	18.0751	17.5941	17.9699		16.9213		-0.437838	-0.0224181	0.460256	1.15375	0.672816	1.04859
30191141	1	143475	156342	214909	332043	252824	238041		17.1304	17.2543	17.7134	18.341	17.9478	17.8609		17.3661		-0.235612	-0.111704	0.347317	0.974958	0.581724	0.494801
30191141	1	430177	455324	621111	1.09178e+06	682629	795970		18.7146	18.7965	19.2445	20.0583	19.3807	19.6024		18.9185		-0.203962	-0.121997	0.325959	1.13972	0.46221	0.683823
30191141	1	448269	541801	680493	961605	742053	869619		18.774	19.0474	19.3762	19.8751	19.5012	19.73		19.0659		-0.291871	-0.0184729	0.310344	0.809208	0.435286	0.664148
30191141	1	802460	732328	1.38222e+06	1.77486e+06	1.34261e+06	1.82178e+06		19.6141	19.4821	20.3986	20.7593	20.3566	20.7969		19.8316		-0.217516	-0.349455	0.566971	0.927684	0.52502	0.965333
30191166	1	19125.6	10932.5	14520.4	12402	20899.1	14943.2		14.2232	13.4163	13.8258	13.5983	14.3512	13.8672		13.8218		0.401437	-0.405451	0.00401363	-0.2235	0.529377	0.0454234
30191166	1	59192.4	20722.6	45472.2	24034.4	66839.8	29578.6		15.8531	14.3389	15.4727	14.5528	16.0284	14.8523		15.2216		0.631544	-0.882662	0.251118	-0.668764	0.80684	-0.369316
30191185	1	13251.6	45859.7	55607.1	44412.7	40863.9	60672.3		13.6939	15.4849	15.763	15.4387	15.3185	15.8888		14.9806		-1.28672	0.504337	0.78238	0.458084	0.337937	0.908149
30191185	1	21050.7	42035.7	57205.5	50392.1	51381	57148.5		14.3616	15.3593	15.8039	15.6209	15.6489	15.8024		15.1749		-0.813344	0.184403	0.628941	0.445986	0.474025	0.627504
30191191	1	1863.94	7343.11	5301.86	9075.61	9264.59	2498.33		10.8641	12.8422	12.3723	13.1478	13.1775	11.2867		12.0262		-1.16206	0.815976	0.346083	1.12158	1.15131	-0.739451
30191191	1	6071.33	13270.6	9437.49	9154.87	18158.3	3926.94		12.5678	13.6959	13.2042	13.1603	14.1483	11.9392		13.156		-0.58818	0.53997	0.0482103	0.00434675	0.992364	-1.21679
30191191	1	1998.23	4285.72	4480.08	4463.3	5493.06	4374.9		10.9645	12.0653	12.1293	12.1239	12.4234	12.095		11.7197		-0.755204	0.345607	0.409597	0.404181	0.70368	0.375321
30191191	1	4454.91	7426.01	8995.27	8517.52	9846.83	10964.8		12.1212	12.8584	13.135	13.0562	13.2654	13.4206		12.7048		-0.583654	0.153537	0.430116	0.351383	0.560609	0.715761
30191191	1	6983.5	6974.89	9237.31	8555.67	7892.73	10308.9		12.7697	12.768	13.1733	13.0627	12.9463	13.3316		12.9036		-0.133914	-0.135695	0.269609	0.159016	0.0426609	0.42796
30191191	1	12804	19473.2	16704.4	21909.5	26404.3	12762.6		13.6443	14.2492	14.0279	14.4193	14.6885	13.6396		13.9738		-0.329512	0.275386	0.0541262	0.445453	0.71467	-0.334181
30191191	1	8337.52	10475	16839.2	13720.5	17676.1	17412.7		13.0254	13.3547	14.0395	13.744	14.1095	14.0879		13.4732		-0.447798	-0.118535	0.566333	0.270847	0.636307	0.614652
30191191	1	9268.99	14444	17421.6	19134.8	16913.3	16676.1		13.1782	13.8182	14.0886	14.2239	14.0459	14.0255		13.695		-0.516793	0.12319	0.393603	0.528921	0.35088	0.330507
30191191	1	13016.6	22717.2	23298.9	23745.4	27823.4	20921.4		13.6681	14.4715	14.508	14.5354	14.764	14.3527		14.2158		-0.547778	0.25565	0.292128	0.319514	0.548165	0.13684
30191191	1	17483.2	11504.4	19013.5	18150	19385.3	20637.2		14.0937	13.4899	14.2147	14.1477	14.2427	14.333		13.9328		0.160909	-0.442876	0.281967	0.214906	0.309904	0.400189
30191191	1	13632.5	16342.5	16668.4	19057.9	18113.6	21186		13.7348	13.9963	14.0248	14.2181	14.1448	14.3708		13.9186		-0.183878	0.0776945	0.106184	0.299458	0.226141	0.452176
30191191	1	14300	21767	18383.3	25312.8	26835.9	26409.1		13.8037	14.4099	14.1661	14.6276	14.7119	14.6887		14.1266		-0.322838	0.283293	0.0395454	0.501014	0.585315	0.562181
30191191	1	17745.6	27385.4	27189.3	28895.5	32405.9	31615.1		14.1152	14.7411	14.7308	14.8186	14.984	14.9483		14.529		-0.413843	0.212105	0.201737	0.289543	0.454954	0.419311
30191191	1	17085.3	25495.7	26193.3	27861.9	32203.4	28320		14.0605	14.638	14.6769	14.766	14.9749	14.7895		14.4584		-0.39798	0.17952	0.21846	0.307558	0.516479	0.331084
30191191	1	17026.6	33310	32723.5	38107.2	39299.3	42596.6		14.0555	15.0237	14.998	15.2178	15.2622	15.3785		14.6924		-0.6369	0.331264	0.305636	0.525373	0.569812	0.686048
30191191	1	23178	39040.9	37854	45332.3	50138.9	43644.7		14.5005	15.2527	15.2082	15.4683	15.6136	15.4135		14.9871		-0.486639	0.265588	0.22105	0.481143	0.626535	0.426411
30191191	1	19460.9	37404.8	33346.6	43989.7	42871.4	47708.2		14.2483	15.1909	15.0253	15.4249	15.3877	15.542		14.8215		-0.573202	0.369443	0.20376	0.603385	0.566233	0.720457
30191191	1	25577.2	40760.3	38864.6	48358.2	42563.3	52075.1		14.6426	15.3149	15.2462	15.5615	15.3773	15.6683		15.0679		-0.425303	0.247006	0.178297	0.493603	0.309452	0.600435
30191191	1	56952.5	49077	66668.4	48151.3	68631.6	58758.8		15.7975	15.5828	16.0247	15.5553	16.0666	15.8425		15.8016		-0.0041775	-0.218889	0.223067	-0.246361	0.264937	0.0408688
30191191	1	90294.9	148227	171788	183657	187071	205733		16.4624	17.1774	17.3903	17.4867	17.5132	17.6504		17.01		-0.547666	0.167421	0.380244	0.476634	0.503201	0.640393
30191211	1	2739.26	5923.77	7040.38	6345.21	5103.6	6101.49		11.4196	12.5323	12.7814	12.6315	12.3173	12.5749		12.2444		-0.824867	0.287865	0.537002	0.387018	0.0728635	0.330511
30191211	1	40863.6	49520.8	54746.3	96371.2	126581	25958		15.3185	15.5957	15.7405	16.5563	16.9497	14.6639		15.5516		-0.233055	0.0441654	0.18889	1.00473	1.39812	-0.887693
30191211	1	18679.3	16761.6	28411.1	29470.4	25675.5	31142.2		14.1891	14.0329	14.7942	14.847	14.6481	14.9266		14.3387		-0.149579	-0.305857	0.455436	0.50825	0.309374	0.587853
30191258	1	5044.33	7072.22	6912.1	9680.59	9387.5	11223.9		12.3004	12.7879	12.7549	13.2409	13.1965	13.4543		12.6144		-0.313987	0.173514	0.140474	0.626445	0.582091	0.839853
30191258	1	9192.23	9586.54	9166.29	9849.1	11816.9	12593		13.1662	13.2268	13.1621	13.2658	13.5286	13.6203		13.185		-0.0188402	0.0417561	-0.0229159	0.0807374	0.34352	0.435292
30191258	1	9228.35	11966.1	12962.5	9852.78	12194.6	13096.1		13.1719	13.5467	13.6621	13.2663	13.574	13.6769		13.4602		-0.288336	0.0864738	0.201862	-0.193878	0.113767	0.216659
30191258	1	11113.6	12507.6	12070.3	14535.9	15878	14801.7		13.44	13.6105	13.5592	13.8273	13.9547	13.8535		13.5366		-0.0965411	0.0739422	0.0225989	0.29076	0.418162	0.316895
30191271	1	19839.7	22741.5	31252.8	25720.9	33760.7	33606.9		14.2761	14.473	14.9317	14.6507	15.0431	15.0365		14.5603		-0.284178	-0.0872412	0.371419	0.0903724	0.482777	0.476189
30191351	1	16597.2	8037.96	14753.1	10794.2	12995.9	16746.1		14.0187	12.9726	13.8487	13.398	13.6658	14.0315		13.6133		0.405322	-0.640721	0.235399	-0.215367	0.0524327	0.418204
30191401	1	5724.84	4561.31	5457.18	6687.17	8174.77	8005.19		12.483	12.1552	12.4139	12.7072	12.997	12.9667		12.3507		0.132289	-0.195498	0.0632095	0.356448	0.646232	0.615989
30191401	1	10244.8	9656.32	9017.02	16113.6	16743.1	16265.6		13.3226	13.2373	13.1384	13.976	14.0313	13.9895		13.2328		0.0898353	0.00449392	-0.0943293	0.743225	0.798512	0.756774
30191401	1	33138.1	16565	21803.2	20252.7	28423.4	23115.9		15.0162	14.0158	14.4123	14.3058	14.7948	14.4966		14.4814		0.534767	-0.465586	-0.0691805	-0.175608	0.313357	0.0151644
30191401	1	22411.1	24823.1	24972.3	36873.6	42448.2	35592.1		14.4519	14.5994	14.608	15.1703	15.3734	15.1193		14.5531		-0.101193	0.0462737	0.0549195	0.61718	0.820293	0.566149
30191424	1	3096.34	3252.39	2908.76	2717.5	3422.62	2570.16		11.5963	11.6673	11.5062	11.4081	11.7409	11.3276		11.5899		0.00640774	0.0773445	-0.0837523	-0.181876	0.150945	-0.2623
30191424	1	22354.9	25322.7	29243.9	34382.3	31806.6	34700.6		14.4483	14.6281	14.8359	15.0694	14.957	15.0827		14.6374		-0.18913	-0.00928953	0.198419	0.431946	0.319607	0.445243
30191428	1	12842	11966.4	11957	15108.9	13928.4	16619.6		13.6486	13.5467	13.5456	13.8831	13.7657	14.0206		13.5803		0.0682997	-0.0335824	-0.0347173	0.302831	0.185463	0.440312
30191428	1	57486.2	36751.7	52573	41827.1	52736.2	38613.5		15.8109	15.1655	15.682	15.3522	15.6865	15.2368		15.5528		0.2581	-0.387305	0.129206	-0.200677	0.133678	-0.316009
30191428	1	59650.4	40183.3	64428.2	44961.2	49797	46606.1		15.8642	15.2943	15.9754	15.4564	15.6038	15.5082		15.7113		0.152924	-0.417011	0.264087	-0.254927	-0.107546	-0.203089
30191428	1	154352	116252	167398	108945	139851	131614		17.2359	16.8269	17.3529	16.7332	17.0935	17.006		17.1386		0.0973055	-0.311669	0.214364	-0.405322	-0.0450287	-0.132605
30191431	1	2780.43	4858.4	6422.6	5849.58	5860.48	6955.55		11.4411	12.2463	12.6489	12.5141	12.5168	12.7639		12.1121		-0.671007	0.134165	0.536842	0.402017	0.404702	0.651848
30191454	1	12943.6	17238.6	19028.4	18352.8	16381	21106.4		13.66	14.0734	14.2159	14.1637	13.9997	14.3654		13.9831		-0.323106	0.0902968	0.23281	0.180657	0.0166747	0.382331
30191454	1	16692.6	19490.6	20236.2	22161.6	16830	26318.3		14.0269	14.2505	14.3047	14.4358	14.0388	14.6838		14.194		-0.167101	0.0564697	0.110631	0.241754	-0.155269	0.489759
30191454	1	23196.7	31187.2	35230.5	30729.5	36673	46740.8		14.5016	14.9287	15.1045	14.9073	15.1624	15.5124		14.8449		-0.343313	0.083721	0.259592	0.0623917	0.317487	0.667451
30191454	1	34985.7	51747.2	54618.6	46145.6	52992	53961.7		15.0945	15.6592	15.7371	15.4939	15.6935	15.7196		15.4969		-0.402449	0.162269	0.24018	-0.00301781	0.196562	0.222723
30191457	1	2671.09	2684.25	5857.84	3153.5	2501.53	4030.46		11.3832	11.3903	12.5162	11.6227	11.2886	11.9767		11.7632		-0.380008	-0.372921	0.752929	-0.140485	-0.47463	0.213507
30191457	1	3176.08	3752.62	3495.28	3011.44	2486.26	4078.49		11.633	11.8737	11.7712	11.5562	11.2798	11.9938		11.7593		-0.126271	0.114381	0.0118892	-0.203063	-0.479541	0.234518
30191457	1	6056.41	4176.77	10426	7867.17	5255.9	5212.6		12.5642	12.0282	13.3479	12.9416	12.3597	12.3478		12.6468		-0.0825222	-0.618599	0.701121	0.294858	-0.287048	-0.298983
30191457	1	6184.04	5735.86	9393.3	6814.35	6258.48	8183.4		12.5943	12.4858	13.1974	12.7344	12.6116	12.9985		12.7592		-0.164848	-0.273387	0.438235	-0.024821	-0.147585	0.239303
30191457	1	2743.52	6242.47	7644.68	8165.91	5300.24	8009.16		11.4218	12.6079	12.9002	12.9954	12.3718	12.9674		12.31		-0.888173	0.297917	0.590256	0.685413	0.0618576	0.657452
30191457	1	5994.55	8003.58	8590.84	8780.8	8405.81	8116.39		12.5494	12.9664	13.0686	13.1001	13.0372	12.9866		12.8615		-0.312047	0.104947	0.2071	0.238654	0.175688	0.12514
30191457	1	5071.7	5838.7	11012.2	8552.5	7390.09	6985.48		12.3083	12.5114	13.4268	13.0621	12.8514	12.7701		12.7488		-0.44058	-0.237401	0.677981	0.313298	0.102544	0.0213109
30191457	1	3774.68	5539.2	7815.66	6945.22	6633.99	8159.35		11.8821	12.4355	12.9322	12.7618	12.6957	12.9942		12.4166		-0.534446	0.0188769	0.515569	0.345221	0.279077	0.577655
30191457	1	5771.93	7608.35	9381.76	5132.31	7064.14	8164.72		12.4948	12.8934	13.1956	12.3254	12.7863	12.9952		12.8613		-0.366444	0.0320844	0.33436	-0.535891	-0.0749854	0.133905
30191457	1	8508.16	8384.67	15675.8	10136.8	8209.95	8782.85		13.0546	13.0335	13.9363	13.3073	13.0032	13.1005		13.3415		-0.286843	-0.307936	0.59478	-0.0341654	-0.338317	-0.241001
30191457	1	12994.7	13559.5	21248.1	16941.2	16574.1	17536.6		13.6656	13.727	14.375	14.0482	14.0166	14.0981		13.9226		-0.256928	-0.195553	0.452481	0.125679	0.0940749	0.175515
30191457	1	26603.1	23960.4	35980.1	26194.5	32798.3	36302.1		14.6993	14.5484	15.1349	14.677	15.0013	15.1478		14.7942		-0.0948881	-0.245831	0.340719	-0.117215	0.20714	0.353573
30191457	1	32536.9	34935.1	38831.6	37658.3	37997.7	47148.4		14.9898	15.0924	15.2449	15.2007	15.2136	15.5249		15.109		-0.119249	-0.0166522	0.135902	0.0916407	0.104582	0.415879
30191457	1	41356.2	73631.9	72921.5	81193.4	72227.8	44960.4		15.3358	16.168	16.1541	16.3091	16.1403	15.4564		15.886		-0.550157	0.282072	0.268086	0.423103	0.254294	-0.429605
30191457	1	60570.1	66009.6	117429	90736.8	80663.1	71564.3		15.8863	16.0104	16.8414	16.4694	16.2996	16.127		16.246		-0.359728	-0.235658	0.595386	0.223354	0.0535757	-0.119094
30191457	1	73688.2	89522.1	153957	127908	95964	116315		16.1691	16.45	17.2322	16.9647	16.5502	16.8277		16.6171		-0.447943	-0.167132	0.615075	0.347655	-0.0668832	0.21059
30191491	1	2468.12	3890.17	5312.87	4239.87	4057.31	5546.88		11.2692	11.9256	12.3753	12.0498	11.9863	12.4375		11.8567		-0.587498	0.0689214	0.518577	0.193106	0.129611	0.580764
30191491	1	4491.42	2828.89	4435.18	6495.69	7367.35	7456.48		12.133	11.466	12.1148	12.6653	12.8469	12.8643		11.9046		0.228371	-0.438565	0.210194	0.760683	0.942346	0.959696
30191491	1	3959.72	3502.8	6240.81	4729.37	6576.66	5261.44		11.9512	11.7743	12.6075	12.2074	12.6831	12.3612		12.111		-0.159814	-0.336705	0.49652	0.096435	0.572143	0.250244
30191491	1	6082.57	7289.79	12037.5	7720.08	10297.9	9556.63		12.5705	12.8317	13.5552	12.9144	13.3301	13.2223		12.9858		-0.415327	-0.154129	0.569456	-0.0713914	0.344267	0.236495
30191491	1	5721.97	6633.08	9602.76	6673.27	9470.45	9124.2		12.4823	12.6955	13.2292	12.7042	13.2092	13.1555		12.8023		-0.320035	-0.106867	0.426903	-0.0981524	0.406886	0.353151
30191491	1	8803.42	9714.08	16982	10745.5	17368.2	10919.2		13.1038	13.2459	14.0517	13.3914	14.0842	13.4146		13.4671		-0.363294	-0.22128	0.584574	-0.0757031	0.617019	-0.0525645
30191491	1	8500.62	6900.85	11814.4	8580.07	10918.6	11610.1		13.0534	12.7526	13.5283	13.0668	13.4145	13.5031		13.1114		-0.0580357	-0.358829	0.416865	-0.0446139	0.303117	0.39171
30191491	1	8367.01	13743.7	12613.5	12276.4	18476	9689.63		13.0305	13.7465	13.6227	13.5836	14.1734	13.2422		13.4666		-0.436056	0.279928	0.156128	0.117047	0.706814	-0.224327
30191491	1	11469.9	13088.2	14400.8	17680.7	21156.6	16473.1		13.4856	13.676	13.8139	14.1099	14.3688	14.0078		13.6585		-0.1729	0.0175117	0.155389	0.451423	0.710353	0.349356
30191491	1	9408.68	15015	15149.1	12707.1	18556.7	11044.1		13.1998	13.8741	13.8869	13.6333	14.1797	13.431		13.6536		-0.453837	0.220506	0.233331	-0.0202699	0.526042	-0.222625
30191491	1	15625.6	16636.3	19361.7	13704.2	22122.2	15345.7		13.9316	14.022	14.2409	13.7423	14.4332	13.9055		14.0649		-0.133239	-0.0428167	0.176056	-0.32253	0.368344	-0.159315
30191491	1	18905.7	22622.5	28109.3	24460.1	27864.5	29219		14.2065	14.4655	14.7788	14.5781	14.7661	14.8346		14.4836		-0.277057	-0.0181148	0.295172	0.0945528	0.282551	0.35103
30191491	1	24106.7	21570.2	26703.1	26745.2	28844.5	30864.5		14.5571	14.3968	14.7047	14.707	14.816	14.9137		14.5529		0.00427155	-0.15612	0.151848	0.154119	0.263136	0.360786
30191491	1	16068.4	29937.9	37271.9	24766.7	48353.3	24284.1		13.9719	14.8697	15.1858	14.5961	15.5613	14.5677		14.6758		-0.703872	0.193878	0.509995	-0.0796923	0.88552	-0.10808
30191491	1	29351.7	39145.7	38178	37911.5	46703.8	39950.5		14.8412	15.2566	15.2205	15.2103	15.5113	15.2859		15.1061		-0.264902	0.150508	0.114394	0.10429	0.405193	0.179866
30191491	1	31289	38664	45844.1	40452.9	47707.3	41266.1		14.9334	15.2387	15.4844	15.304	15.5419	15.3327		15.2188		-0.285472	0.0198633	0.265609	0.0851151	0.323083	0.113828
30191491	1	24533.8	34077.1	38853.7	34851.8	47631.4	35664.8		14.5825	15.0565	15.2458	15.0889	15.5396	15.1222		14.9616		-0.379104	0.0949261	0.284178	0.127358	0.57804	0.160627
30191491	1	26075.1	43558.3	37151.7	36268.4	40540.6	44904.3		14.6704	15.4107	15.1811	15.1464	15.3071	15.4546		15.0874		-0.417009	0.323265	0.0937444	0.0590286	0.219684	0.36717
30191491	1	47793.3	75990.8	99575.3	73351	110319	59747.7		15.5445	16.2135	16.6035	16.1625	16.7513	15.8666		16.1205		-0.575998	0.0930169	0.482981	0.0420098	0.630803	-0.253924
30191491	1	52823.2	106003	124623	103182	135206	85523.8		15.6889	16.6937	16.9272	16.6548	17.0448	16.384		16.4366		-0.747729	0.257134	0.490595	0.218223	0.608186	-0.0525755
30191491	1	87836.9	100932	113984	87721	158888	100359		16.4225	16.623	16.7985	16.4206	17.2776	16.6148		16.6147		-0.19214	0.00834109	0.183799	-0.194044	0.662969	0.000124958
30191504	1	7750.05	1949.33	6700.42	2810.25	5809.98	2798.83		12.92	10.9288	12.71	11.4565	12.5043	11.4506		12.1863		0.733727	-1.2575	0.523774	-0.72978	0.318055	-0.735655
30191504	1	21441.1	9677.52	18595.3	11049.7	21695.7	15795		14.3881	13.2404	14.1826	13.4317	14.4051	13.9472		13.9371		0.451036	-0.696632	0.245595	-0.505335	0.468069	0.0101242
30191504	1	61342.9	25876.8	58905.4	33545.1	59472.2	47469.9		15.9046	14.6594	15.8461	15.0338	15.8599	15.5347		15.47		0.434579	-0.81066	0.376082	-0.436216	0.389899	0.0646943
30191504	1	148811	95844.4	118116	101988	146541	135451		17.1831	16.5484	16.8498	16.638	17.1609	17.0474		16.8605		0.322668	-0.312051	-0.0106173	-0.222419	0.30049	0.186959
30191515	1	3035.44	1952.4	2254.07	2699.28	3008.91	2927.98		11.5677	10.931	11.1383	11.3984	11.555	11.5157		11.2123		0.355344	-0.281314	-0.0740299	0.186011	0.342678	0.303345
30191532	1	2320.56	5128.54	4342.46	7787.55	4460.99	7533.07		11.1803	12.3243	12.0843	12.927	12.1231	12.879		11.863		-0.682705	0.46137	0.221335	1.06399	0.260186	1.01606
30191532	1	6218.63	4083.69	5046.68	4838.22	6498.49	7737.6		12.6024	11.9957	12.3011	12.2403	12.6659	12.9177		12.2997		0.302662	-0.304062	0.00140005	-0.0594575	0.366169	0.617951
30191532	1	6031.94	3396.45	4659.07	4119.87	5094.17	13985		12.5584	11.7298	12.1858	12.0084	12.3146	13.7716		12.158		0.400392	-0.428203	0.0278118	-0.149632	0.156615	1.61357
30191532	1	7901.4	12303.4	12473.1	12634.7	9558.31	15380.4		12.9479	13.5868	13.6065	13.6251	13.2225	13.9088		13.3804		-0.432508	0.206373	0.226136	0.244703	-0.157862	0.528407
30191532	1	10972.9	16833.7	18683.7	20300.1	17620.2	18789.7		13.4217	14.0391	14.1895	14.3092	14.1049	14.1977		13.8834		-0.461742	0.155656	0.306086	0.425792	0.221539	0.314252
30191532	1	47321.5	47438.2	72037.8	82605.5	119363	48718.3		15.5302	15.5338	16.1365	16.3339	16.865	15.5722		15.7335		-0.203269	-0.199718	0.402987	0.600471	1.13152	-0.161303
30191532	1	29591.6	34943.7	40555	41238.5	31446.4	41889.7		14.8529	15.0927	15.3076	15.3317	14.9406	15.3543		15.0844		-0.231512	0.00833216	0.22318	0.247291	-0.143803	0.269895
30191532	1	27822.6	42947.4	43948.1	50608.9	37836.1	56784.1		14.764	15.3903	15.4235	15.6271	15.2075	15.7932		15.1926		-0.428619	0.197694	0.230925	0.434515	0.0148876	0.60061
30191532	1	34131.1	84264.1	66591	98004.4	85920.2	60275.8		15.0588	16.3626	16.023	16.5806	16.3907	15.8793		15.8148		-0.756024	0.547808	0.208216	0.765736	0.575887	0.0644692
30191532	1	32636.9	36221.8	39500	45055.5	43844.6	45484.1		14.9942	15.1446	15.2696	15.4594	15.4201	15.4731		15.1361		-0.141901	0.00845328	0.133448	0.323298	0.283995	0.336957
30191532	1	33410.1	55851.8	47876.7	63210.7	79169	42569.3		15.028	15.7693	15.547	15.9479	16.2726	15.3775		15.4481		-0.42012	0.3212	0.0989201	0.499765	0.824533	-0.0705904
30191532	1	28828.5	58751.5	56913	68195.8	60456.3	79173.8		14.8152	15.8423	15.7965	16.0574	15.8836	16.2727		15.4847		-0.669464	0.357666	0.311798	0.572724	0.398934	0.788063
30191532	1	86002.3	84798.2	107266	105079	121667	119385		16.3921	16.3717	16.7108	16.6811	16.8926	16.8653		16.4916		-0.0994662	-0.119809	0.219275	0.189557	0.401021	0.373714
30191532	1	102137	150373	132835	142328	115667	136675		16.6401	17.1982	17.0193	17.1189	16.8196	17.0604		16.9525		-0.312391	0.245651	0.0667394	0.166321	-0.132912	0.107858
30191557	1	2542.01	3416.08	5137.35	5779.34	4007.95	4070.01		11.3118	11.7381	12.3268	12.4967	11.9686	11.9908		11.7922		-0.480474	-0.0541057	0.53458	0.70446	0.176418	0.198586
30191557	1	1889.57	2892.68	6385.24	4544.1	3988.57	5624.16		10.8838	11.4982	12.6405	12.1498	11.9617	12.4574		11.6742		-0.790344	-0.175996	0.96634	0.475593	0.287471	0.783235
30191557	1	3804.37	9026.46	13073.2	10787.9	7748.27	10922.1		11.8934	13.1399	13.6743	13.3971	12.9197	13.415		12.9026		-1.00913	0.237374	0.771755	0.494557	0.0170886	0.512391
30191557	1	13403.6	13824.6	15736	17411.4	13436.2	19100.6		13.7103	13.755	13.9418	14.0877	13.7138	14.2213		13.8024		-0.0920275	-0.0474012	0.139429	0.285393	-0.0885175	0.418974
30191561	1	4204.18	2332.47	5277.67	6429.48	4515.44	5940.09		12.0376	11.1876	12.3657	12.6505	12.1407	12.5363		11.8636		0.173963	-0.676003	0.50204	0.78684	0.277005	0.672622
30191561	1	15222.3	19709.1	23839.3	27446.1	25228.9	32070		13.8939	14.2666	14.5411	14.7443	14.6228	14.9689		14.2338		-0.339944	0.0327306	0.307213	0.510475	0.38895	0.735094
30191561	1	99421.5	91950.7	105863	116074	98974	130022		16.6013	16.4886	16.6918	16.8247	16.5948	16.9884		16.5939		0.00737466	-0.105322	0.0979475	0.230789	0.000866243	0.394505
30191561	1	103952	96222.5	154289	145547	131540	162999		16.6656	16.5541	17.2353	17.1511	17.0051	17.3145		16.8183		-0.152749	-0.264219	0.416968	0.332815	0.186837	0.4962
30191561	1	159421	187911	214377	264341	186707	253392		17.2825	17.5197	17.7098	18.012	17.5104	17.951		17.504		-0.221505	0.0157048	0.2058	0.508054	0.0064285	0.447025
30191564	1	3782.19	7883.44	9735.5	10270.4	10009.6	6831.17		11.885	12.9446	13.249	13.3262	13.2891	12.7379		12.6929		-0.80788	0.251725	0.556154	0.633318	0.596209	0.0450329
30191564	1	12587.6	25945.7	17229.2	27644.5	28025.1	23629.4		13.6197	14.6632	14.0726	14.7547	14.7744	14.5283		14.1185		-0.498777	0.544709	-0.045932	0.636208	0.655936	0.409801
30191564	1	17263.1	29425.1	29534.3	33524.1	36075.9	28787.5		14.0754	14.8448	14.8501	15.0329	15.1387	14.8132		14.5901		-0.514685	0.25467	0.260015	0.44282	0.548658	0.223068
30191564	1	26269.1	53555.3	55425	60263.2	72978.2	55860.6		14.6811	15.7087	15.7582	15.879	16.1552	15.7695		15.3827		-0.70161	0.326052	0.375558	0.4963	0.772488	0.386854
30191590	1	15579.9	28660.4	23411	31813.8	22822.9	56904.8		13.9274	14.8068	14.5149	14.9574	14.4782	15.7963		14.4164		-0.488955	0.390411	0.098544	0.541008	0.061835	1.37991
30191596	1	23812.9	12067.6	18918.7	13590.6	24674.4	17919.7		14.5395	13.5588	14.2075	13.7303	14.5907	14.1293		14.1019		0.437511	-0.543095	0.105584	-0.371621	0.488784	0.0273145
30191644	1	1783.03	3534.25	3058.05	4925.3	2546.48	4448.53		10.8001	11.7872	11.5784	12.266	11.3143	12.1191		11.3886		-0.588449	0.39862	0.18983	0.877429	-0.0742806	0.730546
30191644	1	11203.3	18844.9	21050.6	21989.4	20010.6	24500		13.4516	14.2019	14.3616	14.4245	14.2885	14.5805		14.005		-0.553398	0.196855	0.356543	0.419494	0.283451	0.575467
30191644	1	17496.6	19609	23284.6	27590.3	29616.3	29950.6		14.0948	14.2592	14.5071	14.7519	14.8541	14.8703		14.287		-0.192248	-0.0278072	0.220055	0.46484	0.567069	0.583265
30191644	1	16033.1	26772.4	31682.6	34747.8	36778	28216.9		13.9688	14.7085	14.9514	15.0846	15.1666	14.7843		14.5429		-0.574107	0.165579	0.408528	0.541756	0.623677	0.241396
30191644	1	24944.9	35276.5	45138.1	46787.7	44109.7	53884		14.6065	15.1064	15.4621	15.5138	15.4288	15.7176		15.0583		-0.451854	0.0481084	0.403746	0.45553	0.370496	0.659258
30191651	1	5274.75	7363.97	8771.69	7533.77	7319.69	8779.3		12.3649	12.8463	13.0986	12.8792	12.8376	13.0999		12.7699		-0.405043	0.076336	0.328707	0.109225	0.0676352	0.329959
30191651	1	6871.19	8530.75	11819.1	11750.1	9005.44	11263.2		12.7463	13.0585	13.5288	13.5204	13.1366	13.4593		13.1112		-0.364867	-0.0527533	0.41762	0.409179	0.0253703	0.348116
30191651	1	15820.4	11898.1	18315.2	17993	19167.4	22955.4		13.9495	13.5384	14.1608	14.1352	14.2264	14.4865		13.8829		0.0666001	-0.344458	0.277857	0.252255	0.343474	0.603652
30191651	1	32946	66115.4	87555.3	84585.6	81720.1	80210.6		15.0078	16.0127	16.4179	16.3681	16.3184	16.2915		15.8128		-0.804993	0.199892	0.605101	0.555318	0.505597	0.478698
30191658	1	17593.6	27360.2	29024.2	35170.7	27955.6	37794.9		14.1028	14.7398	14.825	15.1021	14.7709	15.2059		14.5558		-0.453079	0.183952	0.269128	0.546246	0.21501	0.650061
30191658	1	23576.6	40657.1	37564.6	49672	49350.9	60342.2		14.5251	15.3112	15.1971	15.6001	15.5908	15.8809		15.0111		-0.486058	0.300096	0.185962	0.58902	0.579666	0.869756
30191666	1	43950.2	41381.7	46686.2	57087.9	60217.3	45650.7		15.4236	15.3367	15.5107	15.8009	15.8779	15.4784		15.4237		-8.23816e-05	-0.08696	0.0870424	0.377233	0.454225	0.0546859
30191666	1	51361.9	54795.7	61940.3	63466.5	73802.8	68670.7		15.6484	15.7418	15.9186	15.9537	16.1714	16.0674		15.7696		-0.121183	-0.0278161	0.148999	0.184115	0.401795	0.297814
30191674	1	12230.4	14896.4	13549.5	13184.3	17918	18233.2		13.5782	13.8627	13.726	13.6865	14.1291	14.1543		13.7223		-0.144092	0.140407	0.00368509	-0.0357333	0.406852	0.432005
30191674	1	23761.8	21045	21699	24957	26403.1	33545.6		14.5364	14.3612	14.4053	14.6072	14.6884	15.0338		14.4343		0.102058	-0.0731044	-0.0289538	0.172859	0.254126	0.59954
30191674	1	31513.2	35598.3	30370.1	42421.7	50602.9	38166.2		14.9437	15.1195	14.8904	15.3725	15.6269	15.22		14.9845		-0.0408495	0.135002	-0.0941529	0.387998	0.642417	0.235492
30191699	1	15121.2	15751.6	21492.4	18280.1	22611.9	24878.8		13.8843	13.9432	14.3915	14.158	14.4648	14.6026		14.073		-0.188726	-0.129802	0.318527	0.0849764	0.391783	0.529616
30191699	1	18673.7	21653.2	24721.5	23982.5	24074.3	29026		14.1887	14.4023	14.5935	14.5497	14.5552	14.8251		14.3948		-0.206111	0.00746082	0.19865	0.154863	0.160379	0.430231
30191704	1	1527.39	2326.8	3400.01	2483.45	1722.22	3191.34		10.5768	11.1841	11.7313	11.2781	10.7501	11.6399		11.1641		-0.58725	0.0200296	0.567221	0.11403	-0.414045	0.475846
30191704	1	671.677	3681.23	3361.64	5040.64	2644.03	7629.35		9.39162	11.846	11.7149	12.2994	11.3685	12.8973		10.9842		-1.59256	0.86179	0.730767	1.31521	0.384344	1.91316
30191706	1	3234.56	1979.94	4562.48	2446.7	5271.78	1909.82		11.6594	10.9512	12.1556	11.2566	12.3641	10.8992		11.5887		0.0706208	-0.637491	0.56687	-0.332111	0.775342	-0.689509
30191706	1	8712.43	4663.55	7758.27	7051.58	10718	7288.27		13.0889	12.1872	12.9215	12.7837	13.3878	12.8314		12.7325		0.356329	-0.545318	0.188989	0.0512003	0.655221	0.0988305
30191765	1	5379.67	7212.11	9078.06	9772.78	10932.3	10908.8		12.3933	12.8162	13.1482	13.2546	13.4163	13.4132		12.7859		-0.39259	0.0303136	0.362276	0.468661	0.630421	0.62731
30191765	1	8377.34	7819.71	8955.63	10779.6	10281.2	11530.4		13.0323	12.9329	13.1286	13.396	13.3277	13.4932		13.0313		0.00102452	-0.0983525	0.097328	0.364764	0.296471	0.461906
30191765	1	36742.9	51829.7	59217.3	64395.2	64993.9	62698		15.1652	15.6615	15.8537	15.9747	15.988	15.9361		15.5601		-0.394954	0.101357	0.293598	0.414532	0.427882	0.375997
30191766	1	6146.8	10036.3	7950.49	9759.46	11122.6	10610.7		12.5856	13.2929	12.9568	13.2526	13.4412	13.3732		12.9451		-0.359509	0.34781	0.0116988	0.307456	0.496077	0.428099
30191766	1	10044.5	14178.7	20408	20252.9	27375.1	19902.8		13.2941	13.7914	14.3169	14.3058	14.7406	14.2807		13.8008		-0.506682	-0.00936636	0.516048	0.505038	0.939774	0.47988
30191766	1	9700.34	13038.8	20850.6	23462.5	27239.2	24626.3		13.2438	13.6705	14.3478	14.5181	14.7334	14.5879		13.754		-0.51023	-0.0835209	0.593751	0.764018	0.979348	0.833867
30191805	1	1773.91	5032.92	4872.17	5099.34	3574.15	4549.71		10.7927	12.2972	12.2503	12.3161	11.8034	12.1516		11.7801		-0.987366	0.517098	0.470267	0.536011	0.0233024	0.371477
30191805	1	2503.57	3111.72	3069.06	2930.49	3386.4	2948.63		11.2898	11.6035	11.5836	11.5169	11.7255	11.5258		11.4923		-0.202513	0.111213	0.0913	0.0246419	0.233256	0.0335473
30191805	1	1101.96	2963.86	2645.07	2693.79	3171.45	3026.48		10.1059	11.5333	11.3691	11.3954	11.6309	11.5634		11.0027		-0.896878	0.530525	0.366353	0.392685	0.628191	0.560686
30191805	1	2109.44	4090.88	2466.15	3870	3100.62	6496.28		11.0426	11.9982	11.268	11.9181	11.5983	12.6654		11.4363		-0.393649	0.561899	-0.16825	0.481822	0.162045	1.2291
30191805	1	1989.76	2663.11	3277.91	4201.46	5594.99	5959.24		10.9584	11.3789	11.6786	12.0367	12.4499	12.5409		11.3386		-0.380233	0.040285	0.339948	0.698062	1.11131	1.2023
30191805	1	3998.75	3796.26	5670.65	3915.84	4330.44	6390.31		11.9653	11.8904	12.4693	11.9351	12.0803	12.6417		12.1083		-0.142998	-0.217969	0.360967	-0.173226	-0.0280344	0.533338
30191805	1	3513.87	6651.36	6865.53	6706.65	8894.84	8072.98		11.7788	12.6994	12.7452	12.7114	13.1188	12.9789		12.4078		-0.628966	0.291622	0.337344	0.303565	0.710943	0.571074
30191805	1	4506.92	5797.89	9757.32	6485.71	6288.48	9424.54		12.1379	12.5013	13.2523	12.663	12.6185	13.2022		12.6305		-0.492577	-0.129191	0.621767	0.0325473	-0.0120072	0.571704
30191805	1	7147.96	6087.28	12989.9	6752.3	15425.7	9808.58		12.8033	12.5716	13.6651	12.7212	13.9131	13.2598		13.0133		-0.210019	-0.441752	0.651771	-0.292172	0.899715	0.246493
30191805	1	7875.38	10517.7	10702.5	10576	10893.1	14546.5		12.9431	13.3605	13.3857	13.3685	13.4111	13.8284		13.2298		-0.286643	0.13076	0.155883	0.138731	0.181353	0.598603
30191805	1	10881.2	12129.7	15147.1	14197.1	18115.5	15772.8		13.4096	13.5663	13.8868	13.7933	14.1449	13.9452		13.6209		-0.211303	-0.0545961	0.265899	0.17245	0.524081	0.324297
30191805	1	15484.9	21760.6	25773.3	22896.9	15855.5	23690.4		13.9186	14.4094	14.6536	14.4829	13.9527	14.532		14.3272		-0.408621	0.082229	0.326392	0.155663	-0.374502	0.204818
30191805	1	31083.8	49966.5	61168.3	67620.8	47234.7	74145		14.9239	15.6087	15.9005	16.0452	15.5276	16.1781		15.4777		-0.553807	0.130992	0.422815	0.567497	0.0498776	0.70038
30191805	1	14167.2	35722.3	55663.1	34540.5	37377.2	49410.6		13.7903	15.1245	15.7644	15.076	15.1899	15.5925		14.8931		-1.10281	0.231458	0.871356	0.182923	0.296794	0.699454
30191805	1	45707.2	62453.6	95902.4	69534.7	93853.1	81228.8		15.4801	15.9305	16.5493	16.0854	16.5181	16.3097		15.9866		-0.506502	-0.0561407	0.562643	0.098808	0.53148	0.323068
30191805	1	70275.4	120735	181321	150572	158434	163899		16.1007	16.8815	17.4682	17.2001	17.2735	17.3224		16.8168		-0.71607	0.064684	0.651386	0.383288	0.456718	0.505644
30191805	1	72316.5	143879	179246	185665	167463	179221		16.142	17.1345	17.4516	17.5023	17.3535	17.4514		16.9094		-0.767334	0.225125	0.542209	0.592968	0.444111	0.542008
30191805	1	218221	667036	606121	605419	740551	460406		17.7354	19.3474	19.2092	19.2076	19.4982	18.8125		18.764		-1.0286	0.583379	0.44522	0.443549	0.734213	0.0485199
30191828	1	5931.25	11015.9	7335.94	14053.4	19224.8	5874.57		12.5341	13.4273	12.8408	13.7786	14.2307	12.5203		12.9341		-0.399942	0.493239	-0.0932965	0.844567	1.29662	-0.413795
30191861	1	29151.7	38189.9	41904.7	49132	47795.2	52715.6		14.8313	15.2209	15.3548	15.5844	15.5446	15.6859		15.1357		-0.304382	0.0852304	0.219151	0.448703	0.408904	0.55027
30191872	1	1010.71	1630.21	1612.18	951.825	1876.7	1299.65		9.98115	10.6708	10.6548	9.89455	10.874	10.3439		10.4356		-0.454449	0.235248	0.219201	-0.541045	0.438388	-0.0916909
30191872	1	3720.23	5465.88	9172.04	4278.46	7261.06	7380.31		11.8612	12.4162	13.163	12.0629	12.826	12.8495		12.4801		-0.618972	-0.063908	0.68288	-0.417272	0.345817	0.369318
30191872	1	2633.41	5717.31	6225.59	6499.25	7584.1	7148.81		11.3627	12.4811	12.604	12.6661	12.8888	12.8035		12.1493		-0.786563	0.331845	0.454718	0.51678	0.739486	0.654211
30191872	1	7119.03	5307.96	9868.01	7993.22	9593.61	10736.6		12.7975	12.3739	13.2685	12.9646	13.2279	13.3902		12.8133		-0.0158528	-0.439374	0.455227	0.151244	0.414541	0.576929
30191872	1	4905.56	8410.08	8666.5	7791.42	8308.43	7864.54		12.2602	13.0379	13.0812	12.9277	13.0204	12.9411		12.7931		-0.532911	0.244791	0.28812	0.134556	0.227246	0.148033
30191872	1	9116.52	9442.3	13980	9788.76	14646.7	14040.3		13.1543	13.2049	13.7711	13.2569	13.8383	13.7773		13.3768		-0.222489	-0.171833	0.394322	-0.119845	0.461535	0.400528
30191872	1	7769.17	9852.43	10521.1	12825.4	17267.9	15096.6		12.9235	13.2663	13.361	13.6467	14.0758	13.8819		13.1836		-0.260056	0.0826614	0.177395	0.463117	0.892207	0.69833
30191872	1	10596.5	12111	17043.2	17003.4	18140.6	15782.1		13.3713	13.564	14.0569	14.0535	14.1469	13.946		13.6641		-0.292784	-0.100043	0.392827	0.389454	0.482856	0.281926
30191872	1	11895.3	14928.9	14628	16596.6	17073.4	18164.1		13.5381	13.8658	13.8364	14.0186	14.0595	14.1488		13.7468		-0.208686	0.119027	0.089659	0.271813	0.312673	0.402014
30191872	1	12609.6	12563.3	16222.7	16553.8	19323.3	19256.7		13.6222	13.6169	13.9857	14.0149	14.2381	14.2331		13.7416		-0.119394	-0.124702	0.244096	0.273243	0.496423	0.491443
30191887	1	5188.25	3678.27	2974.19	3712.49	6658.69	5449.77		12.341	11.8448	11.5383	11.8582	12.701	12.412		11.908		0.432992	-0.0632313	-0.36976	-0.0498691	0.792982	0.503937
30191887	1	2718.85	3459.08	4044.27	5906.98	5624.59	5785.09		11.4088	11.7562	11.9817	12.5282	12.4575	12.4981		11.7155		-0.306755	0.0406321	0.266123	0.812666	0.741992	0.782584
30191887	1	10695.7	10964.8	12211.9	11933.6	15581.4	17370.5		13.3847	13.4206	13.576	13.5427	13.9275	14.0844		13.4604		-0.0757056	-0.0398465	0.115552	0.0822964	0.467096	0.623908
30191887	1	35414.3	31946.6	30910.9	45515.4	43509.9	40034		15.112	14.9634	14.9158	15.4741	15.4091	15.2889		14.9971		0.114961	-0.0337057	-0.0812557	0.476986	0.411973	0.291858
30191907	1	5385.53	4403.39	7197.85	8940.31	9161.41	9102.53		12.3949	12.1044	12.8133	13.1261	13.1614	13.1521		12.4375		-0.0426675	-0.333142	0.37581	0.688568	0.723814	0.714512
30191907	1	11969	13403.4	17763.4	23777.2	22603.5	22769.3		13.547	13.7103	14.1166	14.5373	14.4643	14.4748		13.7913		-0.244298	-0.0810063	0.325304	0.745975	0.672943	0.683487
30191907	1	11332	13901.7	12789.9	14003.1	17750.9	17211.3		13.4681	13.763	13.6427	13.7735	14.1156	14.0711		13.6246		-0.156483	0.138373	0.0181096	0.148858	0.491002	0.446464
30191930	1	14873.8	32636.6	37345.2	37565.9	31866.5	48727.6		13.8605	14.9942	15.1886	15.1971	14.9598	15.5725		14.6811		-0.820624	0.313096	0.507528	0.516031	0.278645	0.891346
30191934	1	7900.59	19062.4	14550.8	42283.7	19373.4	47927.2		12.9477	14.2184	13.8288	15.3678	14.2418	15.5486		13.665		-0.717257	0.553443	0.163813	1.70281	0.576789	1.88356
30191934	1	9151.51	21719.9	17095.6	53207.6	21115.4	56923.3		13.1598	14.4067	14.0613	15.6993	14.366	15.7967		13.876		-0.71616	0.530777	0.185383	1.82339	0.490051	1.92078
30191934	1	29971.4	49719.6	35362.5	69034.6	29528.2	89581.3		14.8713	15.6015	15.1099	16.075	14.8498	16.4509		15.1943		-0.322954	0.407274	-0.08432	0.880779	-0.344451	1.25666
30191934	1	47364.4	38103.4	52836.8	69759	45180.3	91699.7		15.5315	15.2176	15.6893	16.0901	15.4634	16.4846		15.4795		0.0520471	-0.261835	0.209788	0.610623	-0.0160607	1.00516
30191959	1	2881.75	3479.98	2298.41	5497.38	1180.21	3795.57		11.4927	11.7649	11.1664	12.4245	10.2048	11.8901		11.4747		0.0180575	0.290193	-0.30825	0.949857	-1.26985	0.41543
30191959	1	7407.11	7999.18	6198.39	10862.7	9235.94	11516.2		12.8547	12.9656	12.5977	13.4071	13.173	13.4914		12.806		0.0486912	0.159634	-0.208325	0.601094	0.36704	0.685369
30191959	1	11792.7	10580.8	8659.53	14168.4	9481.7	18659.4		13.5256	13.3692	13.0801	13.7904	13.2109	14.1876		13.3249		0.200657	0.044214	-0.244871	0.465449	-0.114015	0.86267
30191959	1	10809.2	13756.7	19020	16660.6	16946.2	24445.4		13.4	13.7478	14.2152	14.0241	14.0487	14.5773		13.7877		-0.387708	-0.0398355	0.427543	0.236466	0.260993	0.789593
30191968	1	52161.1	9356.5	14442.3	7644.57	34029.7	14728.7		15.6707	13.1918	13.818	12.9002	15.0545	13.8463		14.2268		1.44387	-1.03507	-0.408804	-1.3266	0.827687	-0.380475
30192014	1	3954.83	5533.08	6933.09	5259.95	8490.94	8700.91		11.9494	12.4339	12.7593	12.3608	13.0517	13.0869		12.3809		-0.43145	0.0530181	0.378432	-0.0200174	0.670859	0.7061
30192014	1	17397	21924.7	18848	24938.9	24797.5	26329.6		14.0866	14.4203	14.2021	14.6061	14.5979	14.6844		14.2363		-0.149762	0.183952	-0.0341901	0.369793	0.361588	0.448079
30192088	1	4467.6	3587.48	6170.06	3525.95	6373.51	4645.4		12.1253	11.8088	12.5911	11.7838	12.6379	12.1816		12.175		-0.0497512	-0.366282	0.416033	-0.39124	0.462837	0.00655207
30192088	1	47792.2	80003.1	95274.8	100472	113643	77489.3		15.5445	16.2878	16.5398	16.6164	16.7942	16.2417		16.124		-0.579533	0.163747	0.415786	0.492416	0.670131	0.117689
30192104	1	17328.5	30955.6	17926.2	22126.8	13521.2	48394.3		14.0809	14.9179	14.1298	14.4335	13.7229	15.5626		14.3762		-0.295327	0.541729	-0.246402	0.0573242	-0.653246	1.18637
30192104	1	31622.4	58821.8	41398.7	46241.2	19605.8	91091.8		14.9487	15.8441	15.3373	15.4969	14.259	16.475		15.3767		-0.428014	0.467391	-0.0393768	0.120219	-1.11768	1.09836
30192161	1	40354.8	20907.6	26224.8	28272.4	42075.9	34377.2		15.3005	14.3517	14.6786	14.7871	15.3607	15.0692		14.7769		0.523508	-0.425206	-0.0983018	0.0101601	0.583761	0.292218
30192161	1	106423	17088	40152.6	39981.1	94508	35920.2		16.6995	14.0607	15.2932	15.287	16.5281	15.1325		15.3511		1.34833	-1.29042	-0.0579112	-0.0640846	1.17703	-0.218609
30192170	1	5029.14	7379.91	14449.1	12278	10406.4	13174.9		12.2961	12.8494	13.8187	13.5838	13.3452	13.6855		12.9881		-0.691963	-0.13867	0.830633	0.595731	0.357131	0.697446
30192183	1	86041.4	154956	176522	271581	321693	93901.2		16.3927	17.2415	17.4295	18.051	18.2953	16.5189		17.0212		-0.628499	0.220256	0.408242	1.02978	1.27408	-0.502386
30192183	1	61220.3	74709.1	104434	121449	120290	115409		15.9017	16.189	16.6722	16.89	16.8762	16.8164		16.2543		-0.352593	-0.0653206	0.417913	0.635679	0.621838	0.562078
30192193	1	4005.91	6691.66	5104.98	2758	3225.39	5401.71		11.9679	12.7081	12.3177	11.4294	11.6553	12.3992		12.3313		-0.363336	0.376897	-0.0135608	-0.901846	-0.675993	0.0679485
30192227	1	7826.55	9775.38	10080.8	9623.97	10856.6	12846.5		12.9342	13.2549	13.2993	13.2324	13.4063	13.6491		13.1628		-0.228644	0.0921321	0.136512	0.0696116	0.243482	0.486283
30192228	1	5669.33	5569.17	7377.2	5860.35	6257.5	8688.83		12.469	12.4432	12.8489	12.5168	12.6114	13.0849		12.587		-0.11806	-0.143776	0.261835	-0.0702523	0.0243482	0.497924
30192228	1	12461.1	8759.08	9069.74	8206.66	8352.22	9714.22		13.6051	13.0966	13.1468	13.0026	13.0279	13.2459		13.2829		0.322291	-0.186287	-0.136004	-0.280271	-0.254907	-0.0369685
30192228	1	41090.4	38901.3	39211.4	44477.1	35363.7	65499.3		15.3265	15.2475	15.259	15.4408	15.11	15.9992		15.2777		0.0488378	-0.0301472	-0.0186906	0.163098	-0.167697	0.721515
30192228	1	50691.4	54403.1	45965.3	50692.6	50504.1	64531		15.6295	15.7314	15.4883	15.6295	15.6241	15.9777		15.6164		0.0130825	0.115031	-0.128113	0.0131191	0.00774307	0.361334
30192244	1	16255.1	19014.3	17947.3	17587	25210.7	18075.9		13.9886	14.2148	14.1315	14.1022	14.6218	14.1418		14.1116		-0.123021	0.10317	0.0198511	-0.00941062	0.510122	0.030152
30192247	1	14690.4	13892.7	22108.7	18599.6	30997.7	21270		13.8426	13.762	14.4323	14.183	14.9199	14.3765		14.0123		-0.169728	-0.250278	0.420006	0.170663	0.907554	0.36421
30192280	1	14714.9	15129.4	15032.7	15104	16650.3	18516.4		13.845	13.8851	13.8758	13.8826	14.0233	14.1765		13.8686		-0.0236305	0.0164393	0.00719121	0.0140141	0.154632	0.307893
30192280	1	36870.9	45060.5	48864.5	54448.1	61283.2	56059.9		15.1702	15.4596	15.5765	15.7326	15.9032	15.7747		15.4021		-0.231894	0.0574857	0.174408	0.330503	0.501114	0.372591
30192281	1	38050.1	41931.9	51259	57259.6	53609.9	70636.9		15.2156	15.3558	15.6455	15.8052	15.7102	16.1081		15.4056		-0.190017	-0.0498702	0.239887	0.3996	0.304583	0.702504
30192281	1	76334.2	57151.4	80186	88701.9	75642.1	112581		16.22	15.8025	16.2911	16.4367	16.2069	16.7806		16.1045		0.115507	-0.302035	0.186528	0.332141	0.102366	0.676065
30192296	1	3492.85	2611.05	4868.75	2990.05	4633.53	3589.45		11.7702	11.3504	12.2493	11.546	12.1779	11.8095		11.79		-0.0197926	-0.439565	0.459357	-0.244027	0.387916	0.0195678
30192296	1	4890.22	7627.33	9505.89	8415.86	8981.05	11233.3		12.2557	12.897	13.2146	13.0389	13.1327	13.4555		12.7891		-0.5334	0.107878	0.425522	0.249811	0.343583	0.666405
30192296	1	12257.5	20816.3	28599.5	29939.3	25276.1	39315.8		13.5814	14.3454	14.8037	14.8698	14.6255	15.2628		14.2435		-0.662126	0.101925	0.5602	0.626251	0.381986	1.01932
30192315	1	20528.3	23468.6	24402	24216.2	32836.8	24807.3		14.3253	14.5184	14.5747	14.5637	15.003	14.5985		14.4728		-0.147502	0.0456163	0.101885	0.090855	0.530199	0.125647
30192315	1	29732.2	41085.2	41744.2	40477.3	60248.8	36077.4		14.8597	15.3263	15.3493	15.3048	15.8786	15.1388		15.1785		-0.318713	0.147878	0.170835	0.126372	0.700191	-0.0396449
30192355	1	8271.69	13141.7	15262.1	16242.2	18601.6	17240.9		13.014	13.6819	13.8977	13.9875	14.1831	14.0735		13.5312		-0.517199	0.1507	0.366499	0.456296	0.651972	0.542383
30192387	1	3013.52	2150.27	2701.15	2584.55	4609.1	3897.13		11.5572	11.0703	11.3994	11.3357	12.1703	11.9282		11.3423		0.214937	-0.271995	0.0570586	-0.00660135	0.827971	0.585899
30192387	1	3539.23	3887.47	4648.21	3990.87	4582.37	4044.78		11.7892	11.9246	12.1825	11.9625	12.1619	11.9818		11.9654		-0.176212	-0.0408158	0.217028	-0.00294478	0.196446	0.0164149
30192387	1	7231.35	4461.14	8235.3	7671.32	7260.74	6625.82		12.82	12.1232	13.0076	12.9053	12.8259	12.6939		12.6503		0.169766	-0.527088	0.357322	0.254975	0.175616	0.0435992
30192387	1	4945.18	4874.3	6619.27	6202.51	9263.37	7953.45		12.2718	12.251	12.6925	12.5986	13.1773	12.9574		12.4051		-0.133272	-0.154103	0.287375	0.193557	0.77224	0.552284
30192387	1	8117.37	9034.37	12371.6	9888.64	13125.1	11832.7		12.9868	13.1412	13.5947	13.2716	13.68	13.5305		13.2409		-0.254118	-0.0997076	0.353826	0.0306412	0.439123	0.289577
30192387	1	7295.81	8211.41	11016.9	10675.1	13299.3	11823.1		12.8329	13.0034	13.4274	13.382	13.6991	13.5293		13.0879		-0.255047	-0.0844852	0.339532	0.294057	0.611162	0.441424
30192387	1	59601.9	55473.2	71532	84523.6	91999.5	75766.7		15.8631	15.7595	16.1263	16.3671	16.4893	16.2093		15.9163		-0.0532204	-0.156789	0.210009	0.450774	0.573046	0.292985
30192387	1	148973	178358	143128	168235	200221	180171		17.1847	17.4444	17.1269	17.3601	17.6112	17.459		17.252		-0.0673238	0.192398	-0.125074	0.108105	0.359216	0.206993
30192393	1	7558.7	10509.1	10766.5	13253.8	12141.9	12106.9		12.8839	13.3593	13.3943	13.6941	13.5677	13.5635		13.2125		-0.328587	0.146838	0.181749	0.481612	0.355192	0.351029
30192393	1	40496	56715	55365.7	67685.6	68981	69343.3		15.3055	15.7914	15.7567	16.0466	16.0739	16.0815		15.6179		-0.312388	0.173562	0.138826	0.428681	0.456032	0.463589
30192408	1	2945.64	3455.82	4847.99	6591.32	6422.71	6368.65		11.5244	11.7548	12.2432	12.6864	12.649	12.6368		11.8408		-0.316416	-0.0859723	0.402388	0.845568	0.808183	0.795988
30192408	1	4097.74	5285.29	8763.74	8209.13	6853.99	9088.67		12.0006	12.3678	13.0973	13.003	12.7427	13.1499		12.4886		-0.487958	-0.120803	0.608761	0.514445	0.254158	0.661284
30192408	1	5105.35	7070.47	10589.2	13088.2	12905.5	14786.3		12.3178	12.7876	13.3703	13.676	13.6557	13.852		12.8252		-0.507436	-0.0376403	0.545076	0.850748	0.830462	1.02674
30192408	1	7915.57	6441.13	11836.3	12257.7	8838.12	14288.6		12.9505	12.6531	13.5309	13.5814	13.1095	13.8026		13.0448		-0.0943589	-0.391739	0.486098	0.536567	0.064687	0.757744
30192408	1	9339.38	12040	14046	14415.7	16420.8	19595		13.1891	13.5555	13.7779	13.8153	14.0032	14.2582		13.5075		-0.3184	0.0480363	0.270364	0.307837	0.495729	0.750683
30192408	1	14461.4	16841.3	18893.8	22205.5	17923.1	25368		13.8199	14.0397	14.2056	14.4386	14.1295	14.6307		14.0218		-0.201839	0.017966	0.183873	0.416875	0.107781	0.608967
30192408	1	14678.8	14804.9	20238.7	25224.1	16111.7	26495.7		13.8415	13.8538	14.3048	14.6225	13.9758	14.6935		14		-0.15857	-0.146235	0.304805	0.622496	-0.0241971	0.693448
30192408	1	17989.1	20609.2	32595.7	39783.5	35893.5	46818.1		14.1348	14.331	14.9924	15.2799	15.1314	15.5148		14.4861		-0.351241	-0.155075	0.506316	0.793805	0.645355	1.0287
30192408	1	16738.5	25126.7	34775.3	44621.5	41023.5	40028		14.0309	14.6169	15.0858	15.4455	15.3242	15.2887		14.5779		-0.54698	0.0390696	0.50791	0.867588	0.746301	0.710859
30192408	1	20518.8	33804.8	46897.3	58020.4	40857.2	69320.7		14.3247	15.0449	15.5172	15.8243	15.3183	16.081		14.9623		-0.637612	0.0826677	0.554945	0.862	0.356028	1.11873
30192408	1	24968.5	37194.6	32286.2	41325.4	37257.2	50462		14.6078	15.1828	14.9786	15.3347	15.1852	15.6229		14.9231		-0.315264	0.259719	0.0555445	0.411657	0.262148	0.699824
30192408	1	30469.7	32882.4	46866.5	51428.2	38527.9	51724.3		14.8951	15.005	15.5163	15.6503	15.2336	15.6586		15.1388		-0.243708	-0.133767	0.377475	0.511476	0.0948196	0.519759
30192408	1	32710.2	42874.3	43494.8	64266.5	48907.1	62970.7		14.9975	15.3878	15.4086	15.9718	15.5778	15.9424		15.2646		-0.267158	0.123215	0.143943	0.707167	0.313145	0.67778
30192408	1	36664.2	39541.2	47658.3	62724.5	54040.8	78260.5		15.1621	15.2711	15.5404	15.9367	15.7218	16.256		15.3245		-0.162449	-0.0534614	0.21591	0.612209	0.397231	0.931465
30192408	1	34257.8	43175.9	53933.1	60519.8	52977.3	71035.3		15.0641	15.3979	15.7189	15.8851	15.6931	16.1162		15.3937		-0.329512	0.0042837	0.325228	0.491465	0.299431	0.722593
30192409	1	3459.12	2409.31	5567.66	2974	5696.51	7059.55		11.7562	11.2344	12.4429	11.5382	12.4759	12.7854		11.8111		-0.0549616	-0.576745	0.631707	-0.272958	0.664712	0.974211
30192409	1	974.428	3616.75	3380.58	3562.97	4283.85	6249.33		9.92841	11.8205	11.7231	11.7989	12.0647	12.6095		11.1573		-1.2289	0.663164	0.565739	0.641549	0.907376	1.45217
30192409	1	15599.3	30853.8	39790.4	30552.8	33378	44616.4		13.9292	14.9132	15.2801	14.899	15.0266	15.4453		14.7075		-0.778299	0.205664	0.572635	0.191521	0.319114	0.737789
30192433	1	2851.03	568.518	1553.58	646.894	2515.12	1662.44		11.4773	9.15106	10.6014	9.33739	11.2964	10.6991		10.4099		1.06736	-1.25884	0.191478	-1.07252	0.88651	0.289183
30192442	1	6127.58	9657.6	9318.68	8484.8	10679.7	9780.53		12.5811	13.2374	13.1859	13.0507	13.3826	13.2557		13.0015		-0.420385	0.235962	0.184423	0.049179	0.381104	0.254211
30192442	1	21696.7	27801.7	23133.3	31373.4	35080.3	31049.4		14.4052	14.7629	14.4977	14.9373	15.0984	14.9223		14.5553		-0.150066	0.207635	-0.0575682	0.382001	0.543123	0.367026
30192453	1	47741	50555.9	42311.8	32352.2	79228.5	33947.8		15.5429	15.6256	15.3688	14.9816	16.2737	15.051		15.5124		0.0305053	0.113156	-0.143661	-0.530857	0.761297	-0.461406
30192467	1	7391.07	3679.26	6453.18	8122.87	8233.11	7070.03		12.8516	11.8452	12.6558	12.9878	13.0072	12.7875		12.4509		0.400714	-0.605655	0.204941	0.536921	0.556368	0.336647
30192467	1	7118.44	7457.38	7812.19	13000.2	12599.6	11454.4		12.7973	12.8645	12.9315	13.6662	13.6211	13.4836		12.8644		-0.0670917	1.7163e-05	0.0670746	0.801804	0.756653	0.619174
30192467	1	10399.9	8481.46	11357.4	14234.5	15376.6	13180.5		13.3443	13.0501	13.4713	13.7971	13.9084	13.6861		13.2886		0.0557042	-0.238476	0.182771	0.50853	0.619877	0.397542
30192467	1	9127.68	9638.42	17081	12364.2	15869.8	16991.1		13.156	13.2346	14.0601	13.5939	13.954	14.0525		13.4836		-0.32754	-0.248992	0.576532	0.110304	0.470428	0.568919
30192467	1	13240.6	16333.2	17432	15541.1	14772	20181.5		13.6927	13.9955	14.0894	13.9238	13.8506	14.3007		13.9259		-0.233199	0.0696355	0.163564	-0.00208453	-0.0753072	0.374864
30192467	1	12850.2	13848.5	17124.9	13309.8	16600.1	19121.2		13.6495	13.7574	14.0638	13.7002	14.0189	14.2229		13.8236		-0.174083	-0.0661378	0.240221	-0.123386	0.195321	0.399298
30192467	1	20830.7	18400.4	24807.1	15783.8	24273.7	21879.5		14.3464	14.1675	14.5985	13.9462	14.5671	14.4173		14.3708		-0.0243543	-0.203328	0.227682	-0.424622	0.196326	0.0465119
30192467	1	21208.1	13839.3	32595	37223.7	39940.5	36698.7		14.3723	13.7565	14.9924	15.1839	15.2856	15.1634		14.3737		-0.00139559	-0.617243	0.618639	0.810208	0.911842	0.789716
30192467	1	79315.8	63583.4	44604.9	55984.5	48787.3	76019.3		16.2753	15.9564	15.4449	15.7727	15.5742	16.2141		15.8922		0.383121	0.0641629	-0.447284	-0.119459	-0.317979	0.32188
30192467	1	14012.8	27372.2	25287.4	32048.5	30080.3	30283.1		13.7745	14.7404	14.6261	14.968	14.8765	14.8862		14.3803		-0.605882	0.360087	0.245794	0.587632	0.496194	0.505886
30192467	1	45010.3	75903.7	78901.5	86706.6	103840	58829.9		15.458	16.2119	16.2678	16.4039	16.664	15.8443		15.9792		-0.521238	0.232678	0.288561	0.42465	0.684798	-0.134943
30192467	1	63102.8	38540.6	86553.6	86330.4	92095	85318.2		15.9454	15.2341	16.4013	16.3976	16.4908	16.3806		15.8603		0.0851455	-0.626181	0.541035	0.53731	0.630564	0.520293
30192467	1	78761.7	68426	71767.9	107302	93031.3	92549.1		16.2652	16.0623	16.1311	16.7113	16.5054	16.4979		16.1528		0.112368	-0.0905811	-0.0217867	0.558481	0.35259	0.345093
30192467	1	131765	93919.1	130434	162837	156335	151978		17.0076	16.5191	16.993	17.3131	17.2543	17.2135		16.8399		0.167703	-0.320769	0.153066	0.473172	0.41438	0.373607
30192478	1	1163.96	1141.98	2259.52	2362.95	2038.79	1833.64		10.1848	10.1573	11.1418	11.2064	10.9935	10.8405		10.4946		-0.309821	-0.337332	0.647153	0.711728	0.498846	0.34585
30192478	1	286.77	871.16	1215.62	2027.28	328.759	1387.66		8.16375	9.76679	10.2475	10.9853	8.36089	10.4384		9.39267		-1.22892	0.374121	0.854799	1.59266	-1.03179	1.04576
30192478	1	1303.64	1072.52	2442.39	1513.51	2217.2	1092.44		10.3483	10.0668	11.2541	10.5637	11.1145	10.0933		10.5564		-0.208067	-0.489611	0.697678	0.00728685	0.558121	-0.463059
30192478	1	2383.39	1663.65	1854.82	2595.39	1042.32	1737.72		11.2188	10.7001	10.8571	11.3417	10.0256	10.763		10.9253		0.293467	-0.225197	-0.06827	0.416404	-0.89975	-0.162355
30192478	1	920.127	1554.93	2216.95	1892.88	2578.13	2686.46		9.84569	10.6026	11.1144	10.8864	11.3321	11.3915		10.5209		-0.675206	0.0817403	0.593466	0.365471	0.811214	0.870597
30192478	1	1188.96	1011.76	1787.04	1758.14	1293.61	1374.19		10.2155	9.98265	10.8034	10.7798	10.3372	10.4244		10.3338		-0.11835	-0.351175	0.469525	0.446008	0.00335616	0.0905404
30192478	1	649.828	1727.81	739.998	1541.83	1674.83	3183.21		9.34391	10.7547	9.53138	10.5904	10.7098	11.6363		9.87667		-0.532759	0.878054	-0.345295	0.713752	0.833126	1.75959
30192478	1	1295.66	969.478	2192.96	2033.15	1581.39	1230.21		10.3395	9.92106	11.0987	10.9895	10.627	10.2647		10.4531		-0.113597	-0.532002	0.645599	0.536435	0.173908	-0.188379
30192478	1	1527.44	1091.71	865.031	1411.35	1350.99	1735.6		10.5769	10.0924	9.75661	10.4629	10.3998	10.7612		10.142		0.434941	-0.0495894	-0.385352	0.320901	0.257844	0.619258
30192478	1	2093.25	903.66	1398.06	1389.94	1471.19	2403.95		11.0315	9.81964	10.4492	10.4408	10.5228	11.2312		10.4335		0.598071	-0.613822	0.0157503	0.00735174	0.0893145	0.797733
30192478	1	1262.78	1598.7	1044.58	1394.43	1442.12	2092.19		10.3024	10.6427	10.0287	10.4455	10.494	11.0308		10.3246		-0.0222048	0.318093	-0.295889	0.120863	0.169386	0.706205
30192478	1	1209.75	1225.5	1820.72	1895.04	1702.59	1799.1		10.2405	10.2592	10.8303	10.888	10.7335	10.8131		10.4433		-0.202822	-0.184159	0.386981	0.4447	0.290205	0.369744
30192478	1	901.671	2223.94	1740.94	3421.18	2431.75	2310.35		9.81646	11.1189	10.7657	11.7403	11.2478	11.1739		10.567		-0.750546	0.551898	0.198648	1.17328	0.680773	0.606893
30192478	1	1861.91	1887.98	2758.3	3034.03	1872.33	3648.04		10.8626	10.8826	11.4296	11.567	10.8706	11.8329		11.0583		-0.195687	-0.175626	0.371313	0.508765	-0.187632	0.774653
30192478	1	2128.86	3524.27	4253.15	4252.11	3680.78	4929.85		11.0559	11.7831	12.0543	12.054	11.8458	12.2673		11.6311		-0.575233	0.152012	0.423221	0.422868	0.214699	0.636233
30192478	1	1911.73	3639.26	2515.92	6016.39	5927.89	6208.71		10.9007	11.8294	11.2969	12.5547	12.5333	12.6001		11.3423		-0.441656	0.487106	-0.0454502	1.21236	1.19098	1.25776
30192478	1	2035.88	3440.16	3139.89	2375.09	2885.1	5475.07		10.9914	11.7483	11.6165	11.2138	11.4944	12.4187		11.4521		-0.460628	0.296196	0.164432	-0.238298	0.042339	0.966597
30192478	1	975.67	1412.29	1260.87	2745.67	2918.15	2226.54		9.93025	10.4638	10.3002	11.4229	11.5108	11.1206		10.2314		-0.301178	0.232398	0.0687804	1.19152	1.27941	0.889157
30192478	1	3396.98	3080.88	3937.14	4263.95	3886.5	4533.28		11.73	11.5891	11.9429	12.058	11.9243	12.1463		11.754		-0.0239953	-0.164906	0.188901	0.303946	0.170226	0.39231
30192478	1	1925.64	1864.56	1632.55	1483.73	2806.19	2873.9		10.9111	10.8646	10.6729	10.535	11.4544	11.4888		10.8162		0.0949036	0.0484024	-0.143306	-0.281204	0.638176	0.672574
30192478	1	3354.98	2908.55	5158.09	4472.7	4128.28	4848.23		11.7121	11.5061	12.3326	12.1269	12.0113	12.2432		11.8503		-0.138175	-0.344181	0.482356	0.276667	0.161061	0.392979
30192478	1	3861.08	4116.4	6601.38	6716.67	5631.81	5985.93		11.9148	12.0072	12.6886	12.7135	12.4594	12.5474		12.2035		-0.288714	-0.196335	0.485048	0.510026	0.255879	0.343857
30192478	1	2952.99	2362.34	3777.21	4332.77	3556.85	5234.41		11.528	11.206	11.8831	12.0811	11.7964	12.3538		11.539		-0.0110613	-0.333022	0.344083	0.542051	0.257361	0.814789
30192478	1	3228.84	2439.22	4849.42	3481.82	4213.85	5206.44		11.6568	11.2522	12.2436	11.7656	12.0409	12.3461		11.7175		-0.0607333	-0.465329	0.526063	0.0480895	0.323387	0.628546
30192478	1	3414.87	2971.66	4514.46	2325.34	4183.22	3767.02		11.7376	11.5371	12.1403	11.1832	12.0304	11.8792		11.805		-0.0673886	-0.267947	0.335336	-0.621779	0.225396	0.0742058
30192478	1	3576.59	1243.5	4567.79	5642.43	6168.29	5556.32		11.8044	10.2802	12.1573	12.4621	12.5907	12.4399		11.4139		0.39042	-1.13375	0.743333	1.04815	1.17671	1.02597
30192478	1	2927.73	4513.38	4549.84	3328.54	2605.29	4175.15		11.5156	12.14	12.1516	11.7007	11.3472	12.0276		11.9357		-0.420153	0.204273	0.21588	-0.235046	-0.58849	0.0918935
30192478	1	2970.17	3563.27	5006.64	3254.18	4500.91	4124.37		11.5363	11.799	12.2896	11.6681	12.136	12.01		11.875		-0.338653	-0.0759937	0.414646	-0.206903	0.261018	0.134978
30192478	1	3285.01	3695.81	3951.33	2313.36	3334.44	4202.29		11.6817	11.8517	11.9481	11.1758	11.7032	12.037		11.8272		-0.145479	0.0245155	0.120963	-0.651385	-0.123932	0.209802
30192478	1	2701.33	2847.33	3256.07	3295.76	4057.34	4105.37		11.3995	11.4754	11.6689	11.6864	11.9863	12.0033		11.5146		-0.115137	-0.0391925	0.154329	0.171808	0.471732	0.488706
30192478	1	4494.21	3599.09	8460.43	6830.85	8206.74	8218.73		12.1339	11.8134	13.0465	12.7378	13.0026	13.0047		12.3313		-0.19741	-0.517845	0.715255	0.406589	0.671334	0.67344
30192478	1	4733.51	5251.18	4059.77	4480.67	3828.73	5091.91		12.2087	12.3584	11.9872	12.1295	11.9026	12.314		12.1848		0.0239261	0.173658	-0.197584	-0.0552694	-0.282118	0.129223
30192478	1	4283.37	5359.63	5865.73	4132.8	4878.28	5384.02		12.0645	12.3879	12.5181	12.0129	12.2522	12.3945		12.3235		-0.258984	0.0644024	0.194581	-0.31061	-0.0713585	0.0709547
30192478	1	1416.62	2772.43	4686.17	4368.33	3520.62	4536.7		10.4682	11.4369	12.1942	12.0929	11.7816	12.1474		11.3665		-0.898217	0.0704789	0.827738	0.726409	0.41516	0.780973
30192478	1	3459.52	4045.84	5162.57	7421.55	3335.38	8283.39		11.7564	11.9822	12.3339	12.8575	11.7036	13.016		12.0242		-0.267796	-0.0419267	0.309722	0.833353	-0.320517	0.991854
30192478	1	3192.8	3929.51	3718.92	5380.86	5112.35	6642.4		11.6406	11.9401	11.8607	12.3936	12.3198	12.6975		11.8138		-0.173196	0.12633	0.0468653	0.579817	0.505968	0.883685
30192478	1	3751.28	4911.65	6894.93	8234.9	7289.12	8699.73		11.8732	12.262	12.7513	13.0075	12.8315	13.0868		12.2955		-0.422327	-0.0335004	0.455827	0.712042	0.536037	0.791262
30192478	1	6451.41	7610.02	10465	8252.33	8111.13	8268.44		12.6554	12.8937	13.3533	13.0106	12.9857	13.0134		12.9675		-0.312058	-0.0737733	0.385831	0.0431286	0.0182295	0.0459423
30192478	1	4976.1	7042.69	5557.5	4137.98	7474.35	5950.69		12.2808	12.7819	12.4402	12.0147	12.8677	12.5388		12.501		-0.220178	0.280934	-0.0607555	-0.486266	0.366756	0.0378653
30192478	1	3488.98	7531.36	4088.66	4446.9	8593.22	7200.76		11.7686	12.8787	11.9974	12.1186	13.069	12.8139		12.2149		-0.446308	0.663795	-0.217487	-0.0963143	0.854083	0.599034
30192478	1	4488.86	4916.19	7481.31	2486.82	4105.37	5325.55		12.1321	12.2633	12.8691	11.2801	12.0033	12.3787		12.4215		-0.289378	-0.158185	0.447564	-1.14143	-0.418216	-0.0427965
30192478	1	5010.58	4621.33	6746.87	5496.16	7536.39	8321.45		12.2908	12.1741	12.72	12.4242	12.8797	13.0226		12.395		-0.104191	-0.220859	0.32505	0.0292572	0.484706	0.627667
30192478	1	3642.25	5692.79	5577.84	7397.73	8228.42	7774.86		11.8306	12.4749	12.4455	12.8529	13.0064	12.9246		12.2503		-0.419727	0.224579	0.195149	0.602526	0.756057	0.674259
30192478	1	5000.52	5161.24	4402.89	5695.84	5026.7	9455.29		12.2879	12.3335	12.1042	12.4757	12.2954	13.2069		12.2419		0.0459965	0.0916357	-0.137632	0.233826	0.053529	0.965039
30192478	1	8421.02	5672.71	9304.41	11723.9	10219.3	15007.7		13.0398	12.4698	13.1837	13.5172	13.319	13.8734		12.8978		0.142012	-0.427944	0.285932	0.619403	0.421241	0.975652
30192478	1	8091.61	5894.4	8633.05	10436	10586.4	10932.7		12.9822	12.5251	13.0757	13.3493	13.3699	13.4164		12.861		0.121213	-0.335869	0.214657	0.488287	0.50893	0.555359
30192478	1	4619.04	3172.86	4291.07	5890.93	4239.73	7933.56		12.1734	11.6316	12.0671	12.5243	12.0498	12.9538		11.9574		0.216023	-0.325788	0.109765	0.566925	0.0924	0.996398
30192478	1	3465.05	6235.07	7467.79	7759.72	8903.29	7238.54		11.7587	12.6062	12.8665	12.9218	13.1201	12.8215		12.4104		-0.651778	0.195752	0.456026	0.511349	0.709683	0.411043
30192478	1	4435.35	3641.69	6381.15	5117.99	8440.79	6161.23		12.1148	11.8304	12.6396	12.3214	13.0432	12.589		12.1949		-0.0801089	-0.364551	0.44466	0.126421	0.848221	0.394061
30192478	1	5239	6995.52	8008.79	8875.01	9393.45	8607.99		12.3551	12.7722	12.9674	13.1155	13.1974	13.0715		12.6982		-0.343145	0.0739963	0.269149	0.417313	0.49922	0.373241
30192478	1	5382.09	4816.25	7050.9	7504.25	6412.78	9192.69		12.394	12.2337	12.7836	12.8735	12.6467	13.1663		12.4704		-0.0764609	-0.236718	0.313179	0.40308	0.176323	0.695859
30192478	1	11921.1	7434.75	10525.8	8586.05	5330.79	7554.39		13.5412	12.8601	13.3616	13.0678	12.3801	12.8831		13.2543		0.286915	-0.394247	0.107332	-0.186538	-0.874184	-0.371217
30192478	1	5585.3	7528.9	8579.14	8707.75	7642.4	9229.9		12.4474	12.8782	13.0666	13.0881	12.8998	13.1721		12.7974		-0.35	0.0808036	0.269197	0.290664	0.10239	0.374678
30192478	1	7040.64	11291.9	9593.97	9313.87	5980.1	11421.2		12.7815	13.463	13.2279	13.1852	12.546	13.4794		13.1575		-0.375976	0.305531	0.0704451	0.0276977	-0.611512	0.321961
30192478	1	4082.82	6027.36	10047.3	9349.58	7498.9	10249		11.9954	12.5573	13.2945	13.1907	12.8725	13.3232		12.6157		-0.620376	-0.0584188	0.678795	0.574958	0.256736	0.707469
30192478	1	10335.7	14519.2	12436	10116.9	17348.4	13004		13.3354	13.8257	13.6022	13.3045	14.0825	13.6667		13.5878		-0.2524	0.237917	0.0144834	-0.283275	0.494763	0.0789113
30192478	1	7723.64	7281.14	10121.5	8852.07	12634.6	10439.7		12.9151	12.8299	13.3051	13.1118	13.6251	13.3498		13.0167		-0.101652	-0.186768	0.28842	0.0950817	0.608371	0.333077
30192478	1	11717.2	9184.88	10044.7	15923.3	8731.69	17963		13.5163	13.165	13.2941	13.9589	13.092	14.1327		13.3252		0.191167	-0.160132	-0.0310348	0.633677	-0.233132	0.807562
30192478	1	13156.7	8426.11	7851.65	11931.3	11606.5	13868.6		13.6835	13.0407	12.9388	13.5425	13.5026	13.7595		13.221		0.462531	-0.18033	-0.282201	0.321478	0.281662	0.538556
30192478	1	9635.61	11068	9794.8	11184.9	11651.1	12756.7		13.2342	13.4341	13.2578	13.4493	13.5082	13.639		13.3087		-0.074531	0.125422	-0.0508907	0.140574	0.199483	0.330281
30192478	1	6022.97	7940.62	10287.6	11722.6	12548.2	12204.2		12.5563	12.955	13.3286	13.517	13.6152	13.5751		12.9466		-0.390378	0.00839965	0.381979	0.570364	0.668559	0.628459
30192478	1	11852.7	10882.3	23404.6	13822.5	17713.2	16531.3		13.5329	13.4097	14.5145	13.7547	14.1125	14.0129		13.819		-0.286113	-0.409351	0.695464	-0.0643111	0.293494	0.193875
30192478	1	9303.36	10559.7	11619.4	13667.4	15576.6	14767.2		13.1835	13.3663	13.5042	13.7384	13.9271	13.8501		13.3514		-0.167817	0.0149251	0.152892	0.387098	0.575737	0.498756
30192478	1	10313.5	13154.5	14843.5	13931	19364.5	15495.7		13.3323	13.6833	13.8575	13.766	14.2411	13.9196		13.6244		-0.292104	0.0589144	0.23319	0.14166	0.616774	0.295225
30192478	1	7599.63	6727.78	11681.3	11187.9	14856.4	11951.1		12.8917	12.7159	13.5119	13.4496	13.8588	13.5449		13.0398		-0.148136	-0.323934	0.47207	0.409797	0.818946	0.505013
30192478	1	8362.39	10381.5	12438.8	16888.3	16528.2	16892.2		13.0297	13.3417	13.6026	14.0437	14.0126	14.0441		13.3247		-0.294959	0.0170629	0.277896	0.719079	0.687983	0.719414
30192478	1	14496.7	11314.8	19398.3	12585.4	18801.1	13567.4		13.8234	13.4659	14.2436	13.6195	14.1985	13.7279		13.8443		-0.0208999	-0.378408	0.399308	-0.224867	0.354194	-0.116472
30192478	1	7626.29	11405	13001.5	10682.9	13811.8	16051.1		12.8968	13.4774	13.6664	13.383	13.7536	13.9704		13.3468		-0.450079	0.130534	0.319545	0.0361678	0.406766	0.623537
30192478	1	13450.8	17545.8	24820	20646	23447.6	19809.2		13.7154	14.0988	14.5992	14.3336	14.5172	14.2739		14.1378		-0.422415	-0.0389807	0.461396	0.19575	0.379329	0.136061
30192478	1	8183.18	9427.97	9607.89	9848.92	15657.3	11100.1		12.9984	13.2027	13.23	13.2657	13.9346	13.4383		13.1437		-0.145281	0.0590043	0.0862767	0.122023	0.790824	0.294555
30192478	1	14082.2	18206.3	14214.4	22410.8	17156.4	13701.6		13.7816	14.1521	13.7951	14.4519	14.0665	13.7421		13.9096		-0.128013	0.242547	-0.114534	0.542306	0.156857	-0.167541
30192478	1	8216.99	14376.8	13622.4	15015.8	15393.1	17088.1		13.0044	13.8115	13.7337	13.8742	13.91	14.0607		13.5165		-0.512122	0.29494	0.217182	0.35768	0.393481	0.544192
30192478	1	12934.7	18746.8	13934.1	15781.6	14272.4	14153.8		13.659	14.1944	13.7663	13.946	13.8009	13.7889		13.8732		-0.214253	0.321136	-0.106883	0.0727426	-0.0722796	-0.0843144
30192478	1	13537	17121.9	13573.7	16241.4	24933.6	15328.2		13.7246	14.0636	13.7285	13.9874	14.6058	13.9039		13.8389		-0.114279	0.224655	-0.110377	0.148489	0.766903	0.0649943
30192478	1	14993.7	13938.4	24181.2	28859	31441.4	33568.3		13.8721	13.7668	14.5616	14.8167	14.9404	15.0348		14.0668		-0.19475	-0.300033	0.494783	0.749917	0.873563	0.967996
30192478	1	20563.3	17048.1	18218.3	17201	21663.2	24346.5		14.3278	14.0573	14.1531	14.0702	14.403	14.5714		14.1794		0.148383	-0.12208	-0.0263026	-0.109198	0.223554	0.392021
30192478	1	12330.4	18591.8	18666	17490.9	18912.6	20901.8		13.5899	14.1824	14.1881	14.0943	14.2071	14.3513		13.9868		-0.396883	0.19557	0.201314	0.107505	0.220248	0.364527
30192478	1	18457.9	15149.8	22656.6	22406	21696.9	23418.6		14.172	13.887	14.4676	14.4516	14.4052	14.5154		14.1755		-0.00358375	-0.288526	0.29211	0.276063	0.229668	0.339835
30192478	1	17059.5	23195.6	27588.5	26904.3	27874.6	26916.3		14.0583	14.5016	14.7518	14.7155	14.7667	14.7162		14.4372		-0.378921	0.0643526	0.314568	0.278338	0.329452	0.278982
30192478	1	19557.3	32023.9	39499.6	43258.7	37718	49930		14.2554	14.9669	15.2696	15.4007	15.203	15.6076		14.8306		-0.575191	0.136251	0.43894	0.570091	0.372354	0.777009
30192478	1	13297.5	19706.3	19073.9	31729.1	29102.2	26658.6		13.6989	14.2664	14.2193	14.9535	14.8288	14.7023		14.0615		-0.362648	0.204852	0.157796	0.892	0.767321	0.640798
30192478	1	21716	51188.2	52421.3	60058.9	79415.2	82669.4		14.4065	15.6435	15.6779	15.8741	16.2771	16.3351		15.2426		-0.836148	0.400902	0.435245	0.631469	1.03451	1.09244
30192478	1	24586.4	39007	50597.3	61939.9	59534.7	58624.3		14.5856	15.2514	15.6268	15.9186	15.8614	15.8392		15.1546		-0.569024	0.096849	0.472175	0.763985	0.706845	0.684615
30192478	1	57985.1	53055.6	37867.4	73266.1	65977.4	70561.2		15.8234	15.6952	15.2087	16.1609	16.0097	16.1066		15.5758		0.247634	0.119456	-0.36709	0.585098	0.433925	0.530826
30192478	1	81479.8	92522.1	152798	146928	167264	137647		16.3142	16.4975	17.2213	17.1647	17.3518	17.0706		16.6776		-0.363488	-0.180133	0.54362	0.487107	0.674125	0.392972
30192478	1	148492	137910	257268	236568	266344	268628		17.18	17.0734	17.9729	17.8519	18.0229	18.0352		17.4088		-0.228744	-0.3354	0.564144	0.443127	0.61416	0.626479
30192478	1	604177	395822	747839	464546	593409	647778		19.2046	18.5945	19.5124	18.8255	19.1787	19.3051		19.1038		0.100787	-0.509331	0.408544	-0.278364	0.0748428	0.201315
30192478	1	2.08714e+06	2.24564e+06	4.00836e+06	2.89619e+06	2.20025e+06	3.5761e+06		20.9931	21.0987	21.9346	21.4657	21.0692	21.77		21.3421		-0.34903	-0.243428	0.592457	0.123599	-0.272889	0.427833
30192483	1	15528.5	13712.8	17295.1	18407.3	24721.2	20545.9		13.9226	13.7432	14.0781	14.168	14.5935	14.3266		13.9146		0.00798489	-0.171408	0.163423	0.253343	0.678815	0.411911
30192494	1	1684.36	2139.6	2020.5	1345.63	1856.98	1837.19		10.718	11.0631	10.9805	10.3941	10.8587	10.8433		10.9205		-0.20255	0.142592	0.0599584	-0.526466	-0.0617924	-0.0772506
30192494	1	8358.47	18049.7	13474.9	13606.7	25082.5	8504.2		13.029	14.1397	13.718	13.732	14.6144	13.054		13.6289		-0.599878	0.510788	0.08909	0.103129	0.98549	-0.574942
30192494	1	16536.8	26623.3	23744.3	40098.4	47654.5	30852.2		14.0134	14.7004	14.5353	15.2913	15.5403	14.9131		14.4164		-0.402973	0.28404	0.118933	0.874894	1.12396	0.496722
30192498	1	23401.8	18427.3	22018.7	25512.4	32740.5	30093.8		14.5143	14.1696	14.4264	14.6389	14.9988	14.8772		14.3701		0.144224	-0.200556	0.0563324	0.2688	0.628678	0.507066
30192515	1	501.341	2076.87	1729.44	2267.37	2798.84	1830.76		8.96965	11.0202	10.7561	11.1468	11.4506	10.8382		10.2486		-1.279	0.771549	0.507448	0.89816	1.20197	0.589585
30192515	1	632.959	3801.54	4990.51	1766.59	3147.65	3493.52		9.30597	11.8924	12.285	10.7867	11.6201	11.7705		11.1611		-1.85513	0.731266	1.12387	-0.374354	0.458956	0.609365
30192515	1	3998.09	28280.7	12071.2	21100	45970.4	3127.52		11.9651	14.7875	13.5593	14.365	15.4884	11.6108		13.4373		-1.47221	1.35023	0.121982	0.927652	2.05111	-1.8265
30192515	1	6886.85	12792.1	10714.6	9034.22	15598	10272.6		12.7496	13.643	13.3873	13.1412	13.9291	13.3265		13.26		-0.510333	0.383	0.127333	-0.118779	0.66911	0.0665538
30192515	1	7708.54	48960.8	34687.3	37650.2	81711	13925		12.9122	15.5793	15.0821	15.2004	16.3182	13.7654		14.5246		-1.61232	1.05477	0.557552	0.675802	1.79368	-0.759175
30192515	1	7436.45	15400	16498	16059.4	19559.1	16432		12.8604	13.9106	14.01	13.9711	14.2556	14.0042		13.5937		-0.733283	0.316958	0.416325	0.377454	0.661871	0.410543
30192515	1	17784.7	51339.3	52910.1	48985.4	68174	45941.8		14.1183	15.6478	15.6913	15.5801	16.0569	15.4875		15.1525		-1.03411	0.495317	0.538796	0.427606	0.904474	0.335059
30192539	1	4068.17	6655.32	7433.08	8323.66	5841.66	10722.3		11.9902	12.7003	12.8597	13.023	12.5122	13.3883		12.5167		-0.52657	0.183559	0.343011	0.506268	-0.00457189	0.871588
30192539	1	8810.96	13337.6	17966.6	16866.4	14257	24548.9		13.1051	13.7032	14.133	14.0419	13.7994	14.5834		13.6471		-0.542024	0.0561019	0.485922	0.394758	0.152277	0.936265
30192544	1	41753.9	49276.8	45497.5	52190.9	57983.9	49739		15.3496	15.5886	15.4735	15.6715	15.8234	15.6021		15.4706		-0.120958	0.11804	0.00291825	0.200931	0.352783	0.131509
30192554	1	1756.19	2581.57	4773.8	2951.75	4262.26	2385.55		10.7782	11.334	12.2209	11.5274	12.0574	11.2201		11.4444		-0.666165	-0.110362	0.776527	0.0829624	0.613008	-0.224287
30192554	1	3418.17	4263.87	9421.35	5361.29	8513.36	4799.46		11.739	12.0579	13.2017	12.3884	13.0555	12.2287		12.3329		-0.593883	-0.274944	0.868827	0.0554716	0.722621	-0.104234
30192554	1	2784.26	4557.93	7756.8	5142.18	7712.55	5542.68		11.4431	12.1542	12.9212	12.3282	12.913	12.4364		12.1728		-0.729752	-0.018665	0.748417	0.155335	0.740164	0.263538
30192554	1	3330.59	4551.62	7902.97	2974.82	7466.49	2508.44		11.7016	12.1522	12.9482	11.5386	12.8662	11.2926		12.2673		-0.56574	-0.115137	0.680877	-0.728713	0.598912	-0.974726
30192554	1	6149.48	9877.73	15076.5	8821.12	14631.2	10411		12.5862	13.27	13.88	13.1067	13.8368	13.3458		13.2454		-0.659159	0.0245556	0.634603	-0.138662	0.591349	0.100415
30192554	1	40115.2	30999.1	71491.3	45987.3	82174.2	55094.7		15.2919	14.9199	16.1255	15.4889	16.3264	15.7496		15.4458		-0.153899	-0.525822	0.679721	0.0431892	0.880638	0.303867
30192575	1	4420.05	4187.73	4196.16	2550.94	4120.3	4921.05		12.1098	12.032	12.0349	11.3168	12.0085	12.2648		12.0589		0.0509612	-0.0269319	-0.0240293	-0.742072	-0.0503525	0.205865
30192586	1	4315.59	7760.91	9282	9000.62	7842.04	9512.5		12.0753	12.922	13.1802	13.1358	12.937	13.2156		12.7259		-0.650515	0.196152	0.454363	0.409951	0.211156	0.489751
30192586	1	17150.8	15182.4	15625.7	13952.8	19176.2	16519.2		14.066	13.8901	13.9316	13.7683	14.227	14.0119		13.9626		0.103412	-0.0724644	-0.0309481	-0.194309	0.264449	0.049273
30192597	1	3606.47	4792.9	5299	4965.75	6586.04	7448.7		11.8164	12.2267	12.3715	12.2778	12.6852	12.8628		12.1382		-0.321813	0.0884964	0.233317	0.13961	0.547008	0.724586
30192598	1	5861.01	7454.25	10460.1	10461.8	9941.9	11971.4		12.5169	12.8638	13.3526	13.3528	13.2793	13.5473		12.9111		-0.394196	-0.0472843	0.441481	0.441713	0.368174	0.636174
30192598	1	8454.59	8611.77	11878.2	8952.4	11414.4	11660		13.0455	13.0721	13.536	13.1281	13.4786	13.5093		13.2179		-0.17236	-0.145784	0.318144	-0.0898205	0.260688	0.291403
30192598	1	24734.7	26860.8	38885.8	49304.1	38668	49406.7		14.5942	14.7132	15.247	15.5894	15.2389	15.5924		14.8515		-0.257227	-0.138257	0.395484	0.737946	0.387378	0.740945
30192598	1	41155.3	40588.1	51488.1	61766.5	61298.2	69508.1		15.3288	15.3088	15.652	15.9145	15.9036	16.0849		15.4298		-0.101047	-0.121067	0.222115	0.484699	0.473721	0.655056
30192607	1	3474.74	3205.71	5042.8	2725.81	4982.58	2731.85		11.7627	11.6464	12.3	11.4125	12.2827	11.4157		11.903		-0.140353	-0.256613	0.396966	-0.490573	0.379635	-0.487378
30192607	1	39690.3	57447	56646.7	55407.6	62896.1	50154.3		15.2765	15.8099	15.7897	15.7578	15.9407	15.6141		15.6254		-0.348885	0.184562	0.164322	0.132414	0.315302	-0.0112955
30192613	1	28802.3	32857.6	45208	46648.3	47322.5	45669.5		14.8139	15.0039	15.4643	15.5095	15.5302	15.4789		15.094		-0.280144	-0.0901035	0.370248	0.415496	0.436196	0.384901
30192625	1	11057.6	9985.87	12138.4	12491.1	10799.9	14870.3		13.4327	13.2857	13.5673	13.6086	13.3987	13.8602		13.4286		0.00417498	-0.142897	0.138722	0.180039	-0.0298355	0.431582
30192625	1	7027.99	14082.4	18708	17746.3	12907.9	23470.5		12.7789	13.7816	14.1914	14.1152	13.656	14.5186		13.584		-0.805058	0.197648	0.60741	0.531274	0.0720083	0.934606
30192629	1	40871.8	35549.5	53035.3	49312.8	51947.3	56926.9		15.3188	15.1175	15.6947	15.5897	15.6648	15.7968		15.377		-0.0581896	-0.259466	0.317655	0.212666	0.287752	0.419814
30192728	1	1437.85	1489.94	2204.39	3609.78	2195.08	3060.37		10.4897	10.541	11.1062	11.8177	11.1001	11.5795		10.7123		-0.2226	-0.171266	0.393866	1.10539	0.387756	0.867188
30192728	1	2237.04	1809.58	2222.22	1667.03	1993.32	3108.47		11.1274	10.8214	11.1178	10.7031	10.961	11.602		11.0222		0.105176	-0.200761	0.0955851	-0.319138	-0.0612392	0.579787
30192728	1	1212.87	1248.41	2142.49	2688.96	1419.93	2689.47		10.2442	10.2859	11.0651	11.3928	10.4716	11.3931		10.5317		-0.287515	-0.24584	0.533355	0.861115	-0.0601156	0.861385
30192728	1	5765.02	10393.6	6704.59	13563.7	24692.1	3285.45		12.4931	13.3434	12.7109	13.7275	14.5918	11.6819		12.8492		-0.356042	0.49426	-0.138218	0.878314	1.74261	-1.16728
30192728	1	1946.57	2629.36	2771.48	2323.03	1638.15	1565.88		10.9267	11.3605	11.4364	11.1818	10.6778	10.6128		11.2412		-0.314499	0.119279	0.195221	-0.0594241	-0.563369	-0.62846
30192728	1	3144.77	2932.81	4930.3	3887.39	4410.37	5479.83		11.6187	11.5181	12.2675	11.9246	12.1067	12.4199		11.8014		-0.182682	-0.283355	0.466036	0.123163	0.305262	0.618494
30192728	1	2140.06	1529.83	4191.76	3239.61	2189.48	2971.16		11.0634	10.5792	12.0333	11.6616	11.0964	11.5368		11.2253		-0.161876	-0.646153	0.80803	0.436292	-0.128935	0.311499
30192728	1	4077.61	1413.61	1967.49	1655.32	2368.21	3181.1		11.9935	10.4652	10.9421	10.6929	11.2096	11.6353		11.1336		0.859901	-0.668435	-0.191466	-0.440711	0.0759713	0.501703
30192728	1	6139.95	5903.48	5620.52	5311.93	6337.29	8735.62		12.584	12.5273	12.4565	12.375	12.6296	13.0927		12.5226		0.0613946	0.00473413	-0.0661288	-0.147594	0.107034	0.570078
30192728	1	6218.1	4566.53	6913.42	9522.93	6240.99	6428.29		12.6023	12.1569	12.7552	13.2172	12.6076	12.6502		12.5048		0.0974828	-0.347892	0.25041	0.712414	0.102785	0.145445
30192728	1	7190.32	7590.31	10298	9526.67	6771.13	8478.94		12.8118	12.8899	13.3301	13.2178	12.7252	13.0497		13.0106		-0.198781	-0.120679	0.31946	0.207135	-0.285442	0.0390472
30192728	1	8119.74	8494.02	10129.9	11297.3	8715.61	13208.8		12.9872	13.0522	13.3063	13.4637	13.0894	13.6892		13.1153		-0.128043	-0.0630298	0.191073	0.348425	-0.0258761	0.573951
30192728	1	9945.52	7076.78	12256.6	11287.5	8492.5	9876.73		13.2798	12.7889	13.5813	13.4624	13.052	13.2698		13.2167		0.0631722	-0.42778	0.364608	0.245785	-0.164684	0.0531593
30192728	1	9755.91	7705.25	14019.8	13520.1	10271.8	13368.9		13.2521	12.9116	13.7752	13.7228	13.3264	13.7066		13.313		-0.0608938	-0.401329	0.462223	0.409866	0.013441	0.393635
30192728	1	9120.58	8865.4	14101.1	15453.7	11143.9	15138		13.1549	13.114	13.7835	13.9157	13.444	13.8859		13.3508		-0.195889	-0.236829	0.432719	0.564861	0.0931721	0.535085
30192728	1	15402.4	9939.05	16121.2	16249.8	14081.5	15111.9		13.9109	13.2789	13.9767	13.9881	13.7815	13.8834		13.7221		0.188722	-0.443251	0.254529	0.265988	0.0593756	0.161251
30192728	1	11368.4	11611.9	16066.1	16179.6	12650.8	17619.9		13.4727	13.5033	13.9717	13.9819	13.6269	14.1049		13.6493		-0.176524	-0.145946	0.32247	0.332627	-0.022321	0.455652
30192728	1	13349.3	12456.2	13980.1	14803.8	16013.8	16299.2		13.7045	13.6046	13.7711	13.8537	13.967	13.9925		13.6934		0.0110973	-0.088805	0.0777077	0.160305	0.273651	0.299133
30192728	1	14854.9	9727.85	16242.4	15471.5	14743.5	17456.5		13.8587	13.2479	13.9875	13.9173	13.8478	14.0915		13.698		0.160642	-0.450108	0.289467	0.219312	0.149781	0.393462
30192728	1	17269.4	11350.7	16727.8	15254.9	18362.6	21706.5		14.0759	13.4705	14.03	13.897	14.1645	14.4058		13.8588		0.217137	-0.388304	0.171167	0.0381901	0.305692	0.547048
30192728	1	12857	14108.2	15964.4	17559.1	17515	19956.1		13.6503	13.7842	13.9626	14.0999	14.0963	14.2845		13.799		-0.148758	-0.0147836	0.163542	0.300904	0.297278	0.485513
30192728	1	15062.5	13506	15803.9	16418.1	14504.3	19941.2		13.8787	13.7213	13.948	14.003	13.8242	14.2835		13.8493		0.0293456	-0.128014	0.0986687	0.153673	-0.0251351	0.434139
30192728	1	17214.9	10510.9	27890.9	24662.9	13991.2	24900.7		14.0714	13.3596	14.7675	14.5901	13.7722	14.6039		14.0662		0.00521044	-0.706559	0.701348	0.523897	-0.293933	0.537736
30192728	1	15401	17799.2	19973.3	14100.1	14065.5	25999.4		13.9107	14.1195	14.2858	13.7834	13.7799	14.6662		14.1053		-0.194612	0.0141796	0.180433	-0.321932	-0.325476	0.560842
30192728	1	18749.5	9324.18	14536.3	20511.7	19180.4	15385.1		14.1946	13.1868	13.8274	14.3242	14.2273	13.9092		13.7362		0.458329	-0.549472	0.0911428	0.587928	0.491115	0.173012
30192728	1	15147.2	18508.5	22931.8	24240.4	25855	18971.7		13.8868	14.1759	14.4851	14.5651	14.6582	14.2116		14.1826		-0.29581	-0.00667728	0.302488	0.382552	0.475581	0.0289866
30192728	1	15767.5	11303.8	16773	22393.1	15355.6	21520.3		13.9447	13.4645	14.0339	14.4508	13.9065	14.3934		13.8143		0.130317	-0.349824	0.219507	0.636419	0.0921322	0.579065
30192728	1	28666.5	20001.7	28227.7	27794.9	22787.9	30295.7		14.8071	14.2878	14.7848	14.7625	14.476	14.8868		14.6266		0.180498	-0.338743	0.158244	0.135954	-0.1506	0.260247
30192728	1	30330.9	25931	38163.4	30710.7	30459.4	39926.1		14.8885	14.6624	15.2199	14.9065	14.8946	15.285		14.9236		-0.0350972	-0.261206	0.296304	-0.0171419	-0.0289993	0.361448
30192728	1	27377.7	21827.8	34273.5	41546.9	28605.4	31666.9		14.7407	14.4139	15.0648	15.3425	14.804	14.9507		14.7398		0.000915075	-0.325919	0.325004	0.602651	0.0641998	0.210886
30192728	1	31529.7	16704.6	29984.2	32600.5	29489.8	30858.1		14.9444	14.028	14.8719	14.9926	14.8479	14.9134		14.6148		0.329659	-0.58681	0.25715	0.377839	0.233162	0.298595
30192728	1	30592.1	23892	31985.4	32724.6	27508.5	33488.2		14.9009	14.5442	14.9651	14.9981	14.7476	15.0314		14.8034		0.0974581	-0.259174	0.161716	0.194677	-0.0558196	0.227952
30192728	1	35646.1	25648.8	32897.2	32643.3	32272.7	41049.6		15.1215	14.6466	15.0057	14.9945	14.978	15.3251		14.9246		0.196879	-0.277978	0.0810991	0.0699184	0.0534458	0.400501
30192728	1	38698.5	25734.9	36170.3	52666.3	34604.1	47974.6		15.24	14.6514	15.1425	15.6846	15.0787	15.55		15.0113		0.228675	-0.359876	0.131202	0.673276	0.067338	0.538668
30192728	1	48278.9	25071.7	40216.6	52625.7	38611.2	49329.8		15.5591	14.6138	15.2955	15.6835	15.2367	15.5902		15.1561		0.402979	-0.542356	0.139378	0.527352	0.0806053	0.434044
30192728	1	32730.3	25099.8	43048.9	49711.6	39501.1	45105.8		14.9983	14.6154	15.3937	15.6013	15.2696	15.461		15.0025		-0.00413341	-0.387084	0.391218	0.598823	0.267135	0.458554
30192728	1	29591.2	48375.5	75947.4	38029.5	3903.98	85498.4		14.8529	15.562	16.2127	15.2148	11.9307	16.3836		15.5425		-0.689647	0.0194628	0.670185	-0.327697	-3.6118	0.841083
30192728	1	48700.7	32625.8	51936.9	58503.9	50859.7	70951.2		15.5717	14.9937	15.6645	15.8362	15.6342	16.1145		15.41		0.161703	-0.416225	0.254522	0.426294	0.224285	0.704587
30192728	1	70037.5	76000.9	77576.9	92263.2	87286.4	75351.5		16.0958	16.2137	16.2433	16.4935	16.4135	16.2013		16.1843		-0.0884621	0.0294258	0.0590363	0.309164	0.229166	0.017046
30192728	1	82962.5	89768.9	91500.7	134340	119306	98003.8		16.3402	16.4539	16.4815	17.0355	16.8643	16.5806		16.4252		-0.0850264	0.0287301	0.0562962	0.610334	0.439111	0.155352
30192728	1	71446.7	56379	96690.4	98273.9	92180.4	101967		16.1246	15.7829	16.5611	16.5845	16.4922	16.6377		16.1562		-0.0315988	-0.373308	0.404907	0.428342	0.335993	0.481567
30192728	1	138483	128837	147524	168559	165511	169439		17.0794	16.9752	17.1706	17.3629	17.3366	17.3704		17.075		0.00430833	-0.0998569	0.0955485	0.287853	0.261522	0.295363
30192728	1	414163	309430	425606	514638	462877	382653		18.6598	18.2393	18.6992	18.9732	18.8203	18.5457		18.5328		0.127089	-0.293497	0.166408	0.440447	0.287518	0.0129256
30192728	1	795591	605931	1.16296e+06	1.36569e+06	784293	1.0374e+06		19.6017	19.2088	20.1494	20.3812	19.581	19.9845		19.6533		-0.0516084	-0.444481	0.496089	0.727923	-0.0722423	0.331262
30192740	1	7550.73	7557.14	9394.98	8947.35	11303.1	12027.3		12.8824	12.8836	13.1977	13.1272	13.4644	13.554		12.9879		-0.1055	-0.104275	0.209775	0.139344	0.476533	0.56612
30192741	1	29504.9	38024.4	43743.6	45116.3	51072.9	40348.1		14.8487	15.2146	15.4168	15.4614	15.6403	15.3002		15.16		-0.311361	0.0546083	0.256753	0.301332	0.480241	0.140181
30192743	1	28696.8	13973.3	19937.1	20312.1	28920.4	24978.4		14.8086	13.7704	14.2832	14.3101	14.8198	14.6084		14.2874		0.521217	-0.516996	-0.00422071	0.0226667	0.532416	0.321007
30192769	1	38248.1	25335.9	40980.2	36421.2	33129.3	34578.5		15.2231	14.6289	15.3226	15.1525	15.0158	15.0776		15.0582		0.164889	-0.429318	0.264428	0.0942789	-0.0423914	0.0193754
30192796	1	7498.73	15920.8	15940.8	21382.7	15852.4	25968.9		12.8724	13.9586	13.9604	14.3842	13.9524	14.6645		13.5972		-0.724733	0.361459	0.363273	0.786993	0.355252	1.06734
30192799	1	2490.84	3718.61	3214.82	2804.4	2563.77	5413.39		11.2824	11.8605	11.6505	11.4535	11.3241	12.4023		11.5978		-0.315414	0.262719	0.052695	-0.144354	-0.273778	0.804489
30192808	1	12549.4	16779.6	16084.6	15693.3	11813.4	19347.5		13.6153	14.0344	13.9734	13.9379	13.5281	14.2399		13.8744		-0.259054	0.16004	0.0990141	0.0634767	-0.346244	0.365477
30192817	1	6315.62	9107.22	13023	12073.1	10565.9	10551		12.6247	13.1528	13.6688	13.5595	13.3671	13.3651		13.1488		-0.524051	0.00403525	0.520016	0.410745	0.218376	0.216331
30192817	1	11630.6	19825.9	18105.9	16412.7	17890.5	21148.6		13.5056	14.2751	14.1442	14.0025	14.1269	14.3683		13.975		-0.46933	0.30013	0.169199	0.0275586	0.151939	0.393307
30192822	1	13095	16719.8	27097.3	23575.4	21008.9	22574.9		13.6767	14.0293	14.7259	14.525	14.3587	14.4624		14.144		-0.467229	-0.11468	0.581909	0.381039	0.214757	0.318479
30192822	1	23391.4	26853.5	43897.3	37153.8	41765.6	38619.7		14.5137	14.7128	15.4218	15.1812	15.35	15.237		14.8828		-0.369093	-0.169965	0.539059	0.298435	0.467241	0.354262
30192822	1	38067.7	33068.4	49833.9	33652.2	48472.1	31073.7		15.2163	15.0132	15.6048	15.0384	15.5649	14.9234		15.2781		-0.0618147	-0.264929	0.326744	-0.239681	0.28677	-0.35469
30192822	1	60434.8	61477.8	113050	104285	97310.4	92634.3		15.8831	15.9078	16.7866	16.6702	16.5703	16.4993		16.1925		-0.309401	-0.284713	0.594114	0.477683	0.377813	0.306766
30192822	1	74210.5	64441.6	142121	85656.9	116277	113315		16.1793	15.9757	17.1168	16.3863	16.8272	16.79		16.4239		-0.244597	-0.448228	0.692826	-0.0376508	0.403269	0.366042
30192822	1	184638	172001	296799	297212	285183	254333		17.4943	17.3921	18.1791	18.1811	18.1215	17.9564		17.6885		-0.194164	-0.296454	0.490618	0.492623	0.433019	0.267854
30192822	1	213533	214659	427380	325461	329506	298824		17.7041	17.7117	18.7052	18.3121	18.3299	18.1889		18.0403		-0.336218	-0.328627	0.664845	0.271809	0.289627	0.148621
30192823	1	3616.6	3851.02	3558.12	4666.23	3607.08	4851.04		11.8204	11.911	11.7969	12.188	11.8166	12.2441		11.8428		-0.022363	0.0682442	-0.0458813	0.345258	-0.0261651	0.401296
30192823	1	3308.93	3015.05	4011.68	5813.7	6356.72	6166.32		11.6922	11.558	11.97	12.5052	12.6341	12.5902		11.74		-0.0478852	-0.182071	0.229957	0.765205	0.894031	0.850158
30192897	1	19872	20882.2	29652.2	26924.8	22526.4	30717.1		14.2784	14.35	14.8558	14.7166	14.4593	14.9068		14.4948		-0.216315	-0.144774	0.361089	0.221887	-0.0354297	0.411994
30192916	1	25002.8	27129.1	27534.8	37442.7	33752.9	33316		14.6098	14.7276	14.749	15.1924	15.0427	15.0239		14.6954		-0.0856398	0.0321126	0.0535273	0.496956	0.347283	0.328486
30192925	1	3400.9	2310.09	4240.66	2485.77	4698.74	4120.26		11.7317	11.1737	12.0501	11.2795	12.1981	12.0085		11.6518		0.0798663	-0.478103	0.398237	-0.372357	0.546224	0.356686
30192925	1	3613.37	3782.1	4869.99	3499.62	2189.56	3745.84		11.8191	11.885	12.2497	11.773	11.0964	11.8711		11.9846		-0.165471	-0.0996314	0.265102	-0.211618	-0.88818	-0.11353
30192925	1	7792.33	7085.86	10597.6	6225.28	7898.42	10860.9		12.9278	12.7907	13.3715	12.6039	12.9473	13.4069		13.03		-0.102167	-0.239278	0.341446	-0.426083	-0.0826568	0.376844
30192925	1	8188.67	15713.6	15089.3	13401.6	10811.2	15789.1		12.9994	13.9397	13.8812	13.7101	13.4002	13.9466		13.6068		-0.607377	0.332931	0.274446	0.103331	-0.206554	0.33985
30192925	1	14420.5	16580.3	23457.8	18466.5	19199.2	24932.8		13.8158	14.0172	14.5178	14.1726	14.2288	14.6058		14.1169		-0.301098	-0.0997497	0.400847	0.0556877	0.111822	0.488825
30192925	1	22428.6	22558.2	31466.3	25781.1	23062.1	28730.7		14.453	14.4614	14.9415	14.654	14.4932	14.8103		14.6186		-0.165596	-0.157279	0.322875	0.0353795	-0.125407	0.191661
30192925	1	18862.6	24850.4	29401.3	23756.2	28195.5	31991.2		14.2032	14.601	14.8436	14.536	14.7832	14.9654		14.5493		-0.346029	0.0517074	0.294321	-0.0132568	0.233905	0.416115
30192925	1	20534.3	29873	34864.9	28219.4	27564.7	40278		14.3257	14.8666	15.0895	14.7844	14.7505	15.2977		14.7606		-0.434849	0.10596	0.328889	0.0238016	-0.0100624	0.537106
30192925	1	34339.1	53115.8	50855.8	55277.9	63974.6	53269.1		15.0676	15.6969	15.6341	15.7544	15.9652	15.701		15.4662		-0.398615	0.230672	0.167942	0.288234	0.499031	0.234829
30192925	1	54932.5	70542.7	84880.8	66326.2	75134.8	85441		15.7454	16.1062	16.3732	16.0173	16.1972	16.3826		16.0749		-0.329539	0.031299	0.29824	-0.0576198	0.122282	0.30773
30192925	1	101871	145612	192108	167798	201107	129343		16.6364	17.1518	17.5516	17.3564	17.6176	16.9808		17.1132		-0.476852	0.0385341	0.438318	0.24313	0.504363	-0.132396
30192925	1	227726	316958	377434	301022	287879	396000		17.7969	18.2739	18.5259	18.1995	18.1351	18.5951		18.1989		-0.401972	0.0750187	0.326953	0.000598801	-0.0638112	0.39623
30192925	1	208527	411235	356583	389381	621523	306114		17.6699	18.6496	18.4439	18.5708	19.2454	18.2237		18.2545		-0.584577	0.395149	0.189427	0.316369	0.990997	-0.0307417
30192930	1	8408.16	10017.8	12943.7	12150.2	12900.5	14445.3		13.0376	13.2903	13.66	13.5687	13.6551	13.8183		13.3293		-0.291697	-0.0389908	0.330688	0.239419	0.32587	0.489042
30192930	1	18778.6	24713.4	19503.5	24524	26525.8	35810.1		14.1968	14.593	14.2514	14.5819	14.6951	15.1281		14.3471		-0.15028	0.245919	-0.095639	0.234825	0.348025	0.780992
30192930	1	46285.1	50234.8	58000.3	96377.7	62503.6	99356.4		15.4983	15.6164	15.8238	16.5564	15.9317	16.6003		15.6461		-0.147883	-0.0297451	0.177628	0.910269	0.285509	0.954182
30192931	1	7317.64	5248.86	8440.22	7145.71	5964.56	8556.01		12.8372	12.3578	13.0431	12.8029	12.5422	13.0627		12.746		0.0911568	-0.388216	0.297059	0.056856	-0.203806	0.316718
30192931	1	8274.79	5596.05	8165.56	5945.06	9626.72	10240.8		13.0145	12.4502	12.9953	12.5375	13.2328	13.322		12.82		0.194494	-0.369818	0.175324	-0.282538	0.412816	0.502026
30192931	1	9090.17	12369.5	18994.6	17200.3	19303	18224.6		13.1501	13.5945	14.2133	14.0701	14.2365	14.1536		13.6526		-0.502539	-0.0581316	0.56067	0.417518	0.583908	0.500968
30192948	1	2897.51	5566.39	5231.23	8302.1	5976.18	9168.85		11.5006	12.4425	12.3529	13.0193	12.545	13.1625		12.0987		-0.598089	0.343841	0.254248	0.920575	0.446321	1.06384
30192948	1	5459.39	5900.69	10855.6	7405.07	6717.02	8896.74		12.4145	12.5267	13.4062	12.8543	12.7136	13.1191		12.7825		-0.367925	-0.255783	0.623708	0.0718467	-0.0688441	0.336612
30192948	1	9045.98	11012.3	12366.1	17333.3	13909.2	18813.7		13.1431	13.4268	13.5941	14.0813	13.7638	14.1995		13.388		-0.244935	0.0388317	0.206104	0.693263	0.375758	0.811499
30192948	1	12540.3	17989.7	24174.8	33354.2	22202.8	33845.2		13.6143	14.1349	14.5612	15.0256	14.4385	15.0467		14.1035		-0.489178	0.0314219	0.457756	0.92212	0.33499	0.943203
30192948	1	16533.7	17544.4	22817.6	30772.4	29463.4	35324.2		14.0131	14.0987	14.4779	14.9094	14.8466	15.1084		14.1966		-0.183443	-0.0978454	0.281288	0.712783	0.650066	0.911799
30192950	1	4018.35	4851.66	7417.51	8280.95	6561.43	10100.6		11.9724	12.2443	12.8567	13.0156	12.6798	13.3022		12.3578		-0.385403	-0.113525	0.498929	0.65779	0.322004	0.944361
30192950	1	6342.16	5810.28	9873.81	7775.41	4987.07	9699.23		12.6308	12.5044	13.2694	12.9247	12.284	13.2437		12.8015		-0.170756	-0.297121	0.467877	0.12319	-0.517537	0.442141
30192950	1	17966.1	15034.7	23802.8	22300.5	18136.7	29358.9		14.133	13.876	14.5388	14.4448	14.1466	14.8415		14.1826		-0.0496239	-0.306604	0.356228	0.262175	-0.0359902	0.658897
30192950	1	25296.4	22063.5	31794.6	36209.1	27524.4	36207.6		14.6266	14.4294	14.9565	15.1441	14.7484	15.144		14.6708		-0.0441921	-0.241465	0.285657	0.473226	0.0775854	0.473167
30192950	1	59973.3	66612.1	79186.2	84426.1	73455.6	100505		15.872	16.0235	16.273	16.3654	16.1646	16.6169		16.0562		-0.184131	-0.032667	0.216798	0.309237	0.108421	0.560741
30192983	1	29890.2	25886.4	27229.9	30143.3	28471.3	34315.7		14.8674	14.6599	14.7329	14.8795	14.7972	15.0666		14.7534		0.113988	-0.0934924	-0.0204952	0.126151	0.043823	0.313184
30192989	1	36410.8	40235	47528.2	53691.4	61878.2	57195.5		15.1521	15.2962	15.5365	15.7124	15.9171	15.8036		15.3282		-0.176168	-0.0320816	0.20825	0.384158	0.588898	0.475368
30192995	1	2911.87	3273.73	3518.19	4888.3	3643.74	5441.27		11.5077	11.6767	11.7806	12.2551	11.8312	12.4097		11.655		-0.147292	0.0216967	0.125595	0.600093	0.176182	0.754705
30192995	1	2831.91	3930.01	6616.16	5543.41	4220.78	5015.18		11.4676	11.9403	12.6918	12.4366	12.0433	12.2921		12.0332		-0.565657	-0.0929017	0.658559	0.403339	0.0100745	0.258866
30192995	1	4155.03	4866.91	5235.21	6028.74	5132.76	5244.64		12.0206	12.2488	12.354	12.5576	12.3255	12.3566		12.2078		-0.187178	0.0409682	0.14621	0.34982	0.117699	0.148808
30192995	1	5205.72	5150.35	5769.75	6591.03	6475.94	8160.67		12.3459	12.3305	12.4943	12.6863	12.6609	12.9945		12.3902		-0.0443279	-0.0597549	0.104083	0.296077	0.270663	0.604261
30192995	1	5213.54	6736.2	8909.66	8703.82	9876.35	10199.2		12.348	12.7177	13.1212	13.0874	13.2698	13.3162		12.729		-0.380926	-0.0112546	0.392181	0.358459	0.540787	0.587191
30192995	1	4613.74	6943.57	4983.97	5827.89	9507.03	8340.82		12.1717	12.7615	12.2831	12.5088	13.2148	13.026		12.4054		-0.2337	0.356042	-0.122342	0.103338	0.809358	0.620553
30192995	1	6567.56	7254.86	9636.79	11568.6	9710.87	13953.3		12.6811	12.8247	13.2343	13.4979	13.2454	13.7683		12.9134		-0.232262	-0.0886723	0.320934	0.584523	0.331981	0.85491
30192995	1	3983.03	9087.36	8541.49	15088.2	11655.2	12012.2		11.9597	13.1496	13.0603	13.8811	13.5087	13.5522		12.7232		-0.763538	0.426456	0.337082	1.15794	0.785502	0.829028
30192995	1	10226.2	9353.7	16237.2	16181.2	16204.2	20557.3		13.32	13.1913	13.987	13.982	13.9841	14.3274		13.4994		-0.179462	-0.308117	0.48758	0.482591	0.484643	0.827923
30192995	1	15125.6	20156	34108.5	31319.5	29717.4	30461.2		13.8847	14.2989	15.0578	14.9348	14.859	14.8947		14.4138		-0.529118	-0.114903	0.644021	0.520951	0.445195	0.480862
30192995	1	28447.7	64983.5	74546	91108.1	77656.6	88525.6		14.796	15.9878	16.1858	16.4753	16.2448	16.4338		15.6566		-0.860527	0.331235	0.529293	0.81874	0.58827	0.777257
30192995	1	333175	477038	473329	513705	576190	525756		18.3459	18.8637	18.8525	18.9706	19.1362	19.004		18.6874		-0.341461	0.176361	0.1651	0.283196	0.448802	0.316651
30193002	1	1384.22	3183.29	4815.36	4273.53	3357.85	4289.63		10.4349	11.6363	12.2334	12.0612	11.7133	12.0666		11.4349		-1	0.20144	0.798565	0.626351	0.278461	0.631774
30193002	1	8674.76	17899	17440.3	24307.4	24299.2	10594.6		13.0826	14.1276	14.0901	14.5691	14.5686	13.371		13.7668		-0.684171	0.360815	0.323356	0.802332	0.801845	-0.395735
30193018	1	19524.2	25808.5	23233.2	31312	39545.9	34164		14.253	14.6556	14.5039	14.9344	15.2712	15.0602		14.4708		-0.217835	0.184748	0.0330866	0.463617	0.800427	0.589376
30193020	1	38536.9	22986.2	30808.2	22151.3	52705.2	31553.3		15.234	14.4885	14.911	14.4351	15.6857	14.9455		14.8778		0.356134	-0.38934	0.0332059	-0.442716	0.807839	0.0676861
30193025	1	3901.59	3600.42	5722.81	6601.91	5132.77	7947.45		11.9298	11.8139	12.4825	12.6887	12.3255	12.9563		12.0754		-0.145588	-0.261485	0.407073	0.613235	0.250087	0.880843
30193025	1	8273.82	8995.63	12682.6	9956.15	9745.16	14389		13.0143	13.135	13.6306	13.2814	13.2505	13.8127		13.26		-0.245631	-0.124961	0.370592	0.0214019	-0.00949981	0.552705
30193025	1	22704.4	35447.4	46779.4	37365.3	30922.9	44618.5		14.4707	15.1134	15.5136	15.1894	14.9164	15.4454		15.0326		-0.561872	0.0808382	0.481034	0.156859	-0.116167	0.412802
30193034	1	4897.71	4121.51	4649.69	4301.79	3167.02	6111.64		12.2579	12.009	12.1829	12.0707	11.6289	12.5773		12.1499		0.107967	-0.140964	0.0329971	-0.0792033	-0.521013	0.427421
30193034	1	5470.34	5040.67	9385.28	7030.4	7745.91	8430.01		12.4174	12.2994	13.1962	12.7794	12.9192	13.0413		12.6377		-0.220251	-0.338267	0.558518	0.141724	0.281553	0.403652
30193034	1	8505.32	9014.96	11443.5	14314.7	13266.4	13198.7		13.0541	13.1381	13.4822	13.8052	13.6955	13.6881		13.2248		-0.170683	-0.0867278	0.257411	0.580374	0.470657	0.463281
30193034	1	15636.8	24646.1	24479.7	24882.6	20767.9	32756.3		13.9327	14.5891	14.5793	14.6029	14.3421	14.9995		14.367		-0.434354	0.222066	0.212288	0.235843	-0.024941	0.632474
30193034	1	30994.6	35727	41073.9	39769.1	37264.1	41958.2		14.9197	15.1247	15.3259	15.2794	15.1855	15.3567		15.1235		-0.203733	0.00126122	0.202472	0.155897	0.0620338	0.2332
30193057	1	1819.01	2109.77	1520.76	1924.26	2078.48	3123.95		10.8289	11.0429	10.5706	10.9101	11.0213	11.6092		10.8141		0.0148092	0.228746	-0.243555	0.0959612	0.207183	0.795031
30193057	1	2057.4	1087.17	2766.7	1490.99	2109.03	1279.21		11.0066	10.0864	11.4339	10.5421	11.0424	10.321		10.8423		0.1643	-0.755943	0.591642	-0.300249	0.200057	-0.52127
30193057	1	3049.76	1157.75	4361.59	2921.53	4006	5430.03		11.5745	10.1771	12.0906	11.5125	11.9679	12.4067		11.2807		0.293738	-1.10363	0.809894	0.231763	0.687204	1.126
30193057	1	2903.95	4535.18	4284.75	3140.52	2876.95	6443.46		11.5038	12.1469	12.065	11.6168	11.4903	12.6536		11.9052		-0.401446	0.241697	0.15975	-0.288456	-0.41492	0.748373
30193057	1	3932.18	4344.72	3606.56	6189.18	5946	5824.6		11.9411	12.085	11.8164	12.5955	12.5377	12.5079		11.9475		-0.00641059	0.137526	-0.131115	0.64801	0.590182	0.560419
30193057	1	6004.89	5867.05	7331.08	5857.24	5963.46	6853.63		12.5519	12.5184	12.8398	12.516	12.5419	12.7427		12.6367		-0.0847948	-0.118298	0.203093	-0.120711	-0.0947818	0.105936
30193057	1	3404.04	3620.88	4992.39	4725.99	5292.74	6660.61		11.733	11.8221	12.2855	12.2064	12.3698	12.7014		11.9469		-0.213858	-0.124765	0.338623	0.259509	0.422907	0.754547
30193057	1	7374.17	7396.88	11069.1	7027.56	10100.7	11358.8		12.8483	12.8527	13.4342	12.7788	13.3022	13.4715		13.0451		-0.196805	-0.192369	0.389174	-0.266263	0.257098	0.426457
30193057	1	8407.27	7646.44	8918.31	9320.02	9302.53	12325		13.0374	12.9006	13.1226	13.1861	13.1834	13.5893		13.0202		0.0172387	-0.11961	0.102372	0.165934	0.163224	0.569118
30193057	1	7346.36	11447.5	11523.7	12516.8	10503.9	11966.8		12.8428	13.4827	13.4923	13.6116	13.3586	13.5468		13.2726		-0.429811	0.210119	0.219691	0.338956	0.0860121	0.274131
30193057	1	9726.11	13723.1	13553	14185.3	16960.7	13799.4		13.2476	13.7443	13.7263	13.7921	14.0499	13.7523		13.5728		-0.325118	0.171557	0.15356	0.219344	0.477145	0.179557
30193057	1	13028.3	8993.31	10561.8	11297.1	14919.5	17112.3		13.6694	13.1346	13.3666	13.4637	13.8649	14.0627		13.3902		0.279171	-0.255548	-0.0236235	0.0734784	0.474731	0.672564
30193057	1	10891.5	9945.76	15572	15009.2	17524.9	19430.9		13.4109	13.2799	13.9267	13.8736	14.0971	14.2461		13.5391		-0.128237	-0.25928	0.387516	0.334414	0.557972	0.706919
30193057	1	16034.5	17001.5	18340.2	17782.9	17591	21484.1		13.9689	14.0534	14.1627	14.1182	14.1025	14.391		14.0617		-0.0927667	-0.00829042	0.101057	0.0565435	0.0408876	0.329316
30193057	1	23353.6	29581.3	29324.3	37700.9	33720.7	31284.3		14.5114	14.8524	14.8398	15.2023	15.0413	14.9332		14.7345		-0.223165	0.117876	0.105289	0.467791	0.306826	0.198629
30193057	1	27115.1	30229.6	29802.3	36308.6	32938.4	35003.9		14.7268	14.8837	14.8631	15.148	15.0075	15.0952		14.8245		-0.09773	0.0591336	0.0385965	0.323481	0.182941	0.270685
30193057	1	27920.2	31282.9	26110.9	30229.1	31436.2	34175.8		14.769	14.9331	14.6724	14.8836	14.9401	15.0607		14.7915		-0.0224685	0.141596	-0.119127	0.0921601	0.148649	0.269197
30193057	1	30612.3	21998.7	30191.6	33073.3	38092	31823.9		14.9018	14.4251	14.8819	15.0134	15.2172	14.9578		14.7363		0.165553	-0.311141	0.145588	0.277109	0.480928	0.221552
30193057	1	24643.4	36907.8	34596.1	39724.6	40157.8	42297.1		14.5889	15.1716	15.0783	15.2777	15.2934	15.3683		14.9463		-0.357375	0.225346	0.13203	0.331453	0.3471	0.421979
30193057	1	50950.8	66923.6	87492.5	84644.6	77567.3	83130.5		15.6368	16.0302	16.4169	16.3691	16.2432	16.3431		16.028		-0.391155	0.00225538	0.3889	0.341159	0.215189	0.315119
30193057	1	49258.5	66749.1	77261.9	90726.4	84512.4	97098.3		15.5881	16.0265	16.2375	16.4692	16.3669	16.5672		15.9507		-0.362587	0.075789	0.286798	0.518564	0.416203	0.616487
30193057	1	54218.3	64972.4	80717.3	78623.5	97344.6	77000.2		15.7265	15.9875	16.3006	16.2627	16.5708	16.2326		16.0049		-0.278381	-0.0173348	0.295716	0.257799	0.565938	0.2277
30193057	1	42616.5	63495.1	99340.4	88550	97232.9	99012.7		15.3791	15.9544	16.6001	16.4342	16.5692	16.5953		15.9779		-0.598734	-0.0235006	0.622234	0.456346	0.591298	0.617467
30193057	1	76102.6	79795.2	86034.3	113311	110099	109323		16.2157	16.284	16.3926	16.7899	16.7484	16.7382		16.2974		-0.0817739	-0.0134181	0.095192	0.492501	0.451015	0.440809
30193057	1	72953	94606.1	101745	98605.6	114543	96011.9		16.1547	16.5296	16.6346	16.5894	16.8055	16.5509		16.4396		-0.284964	0.0900031	0.19496	0.149738	0.365885	0.111283
30193057	1	86931.5	110910	156763	153552	148659	169128		16.4076	16.759	17.2582	17.2284	17.1817	17.3678		16.8083		-0.400689	-0.0492558	0.449945	0.420083	0.373371	0.559477
30193058	1	6396.27	4836.11	10027.7	7145.84	9821.86	7880.23		12.643	12.2396	13.2917	12.8029	13.2618	12.944		12.7248		-0.0817672	-0.485152	0.566919	0.0781047	0.536998	0.21924
30193058	1	6677.72	7020.23	12223.7	13005.5	17120.5	12049.5		12.7051	12.7773	13.5774	13.6668	14.0634	13.5567		13.0199		-0.314804	-0.242641	0.557445	0.646891	1.0435	0.536747
30193058	1	9312.27	12378.4	15344.3	14448.2	15049.2	16951.1		13.1849	13.5955	13.9054	13.8186	13.8774	14.0491		13.562		-0.377041	0.0335826	0.343458	0.25664	0.315437	0.487138
30193058	1	20153.3	22359.1	27826.8	25558.7	28465.3	23868.5		14.2987	14.4486	14.7642	14.6415	14.7969	14.5428		14.5038		-0.205102	-0.0552546	0.260357	0.137698	0.293088	0.0389922
30193086	1	14105.3	12514.6	12901.3	15875.6	18674.4	17644.8		13.784	13.6113	13.6552	13.9545	14.1888	14.107		13.6835		0.100451	-0.072177	-0.0282742	0.271024	0.505276	0.423456
30193089	1	3243.23	4605.12	4294.59	4712.2	5088.4	7583.83		11.6632	12.169	12.0683	12.2022	12.313	12.8887		11.9668		-0.303631	0.202175	0.101457	0.235338	0.346148	0.921864
30193089	1	3588.08	4549.15	5532.18	5227.13	5531.95	7064.82		11.809	12.1514	12.4336	12.3518	12.4336	12.7864		12.1313		-0.322341	0.0200451	0.302296	0.220466	0.302235	0.655099
30193093	1	7031.59	5492.75	7851.91	8511.34	4288.68	9302.41		12.7796	12.4233	12.9388	13.0552	12.0663	13.1834		12.7139		0.06571	-0.290612	0.224902	0.341245	-0.647606	0.469464
30193093	1	16899.3	14512.7	17450.8	19854.5	19464.5	15203.6		14.0447	13.825	14.091	14.2772	14.2486	13.8921		13.9869		0.0577738	-0.161873	0.104099	0.290277	0.261651	-0.0947806
30193093	1	30582.2	26508.7	35626.8	33767.3	32228.8	48053.9		14.9004	14.6942	15.1207	15.0433	14.9761	15.5524		14.9051		-0.00468225	-0.210907	0.215589	0.138255	0.0709789	0.647282
30193119	1	24853.2	37617.6	38788.4	52733.3	48844.8	54698.2		14.6011	15.1991	15.2433	15.6864	15.5759	15.7392		15.0145		-0.413389	0.184586	0.228803	0.671893	0.561383	0.724673
30193134	1	17334.9	27074.9	21372.5	23358.1	27776	24032.3		14.0814	14.7247	14.3835	14.5116	14.7616	14.5527		14.3965		-0.315116	0.328157	-0.0130405	0.115126	0.365042	0.156175
30193147	1	6261.33	9820.74	9176.8	9701.74	11120.9	9904.91		12.6123	13.2616	13.1638	13.244	13.441	13.2739		13.0125		-0.400295	0.249068	0.151227	0.231481	0.428434	0.261381
30193188	1	12047.6	15089.9	22050.4	17761.4	16505.6	17553.1		13.5565	13.8813	14.4285	14.1165	14.0107	14.0994		13.9554		-0.398967	-0.074124	0.473091	0.161033	0.0552471	0.144012
30193188	1	14236	15405.4	17551.2	18367.7	25335.1	24212.8		13.7973	13.9111	14.0993	14.1649	14.6289	14.5635		13.9359		-0.138642	-0.0247472	0.163389	0.228989	0.692956	0.627589
30193188	1	13992	16132.1	16942.7	27118.4	27192.4	24299.5		13.7723	13.9776	14.0484	14.727	14.7309	14.5686		13.9328		-0.160465	0.0448673	0.115597	0.794208	0.798141	0.635862
30193188	1	15424.3	20214.8	19435.3	28617.8	31610.4	28283.5		13.9129	14.3031	14.2464	14.8046	14.9481	14.7877		14.1541		-0.241226	0.14898	0.0922458	0.650476	0.793963	0.633527
30193188	1	15690.5	15178.5	21118.3	28778.3	35590.2	28201.9		13.9376	13.8897	14.3662	14.8127	15.1192	14.7835		14.0645		-0.126912	-0.174777	0.301689	0.748175	1.05468	0.718987
30193188	1	31792.7	36019.6	43213.7	55810.8	65846.1	61539.1		14.9564	15.1365	15.3992	15.7683	16.0068	15.9092		15.164		-0.207627	-0.0275395	0.235167	0.604224	0.842777	0.745182
30193273	1	11224.2	16797.6	23694.8	17758.4	19442.9	23852.6		13.4543	14.036	14.5323	14.1162	14.247	14.5419		14.0075		-0.553201	0.0284426	0.524758	0.108685	0.239429	0.534334
30193286	1	1065.15	1144.58	2822.67	1988.19	2508.85	3181.54		10.0568	10.1606	11.4628	10.9572	11.2928	11.6355		10.5601		-0.503253	-0.399495	0.902747	0.397138	0.732709	1.07541
30193286	1	5152.54	5793.61	6182.68	6789.5	6378.86	8499.92		12.3311	12.5002	12.594	12.7291	12.6391	13.0532		12.4751		-0.144042	0.025136	0.118906	0.253978	0.163971	0.578122
30193286	1	4635.21	4076.46	6203.08	7618.77	7618.47	8452.56		12.1784	11.9931	12.5988	12.8953	12.8953	13.0452		12.2568		-0.0783446	-0.263662	0.342006	0.638579	0.638522	0.788409
30193286	1	9056.01	11432.2	14308.7	15017.4	15788.6	18189.7		13.1447	13.4808	13.8046	13.8743	13.9466	14.1508		13.4767		-0.332035	0.00411923	0.327916	0.397649	0.469906	0.674137
30193286	1	35092.3	46815.6	62958.6	79375.6	82353.9	81245.3		15.0989	15.5147	15.9421	16.2764	16.3296	16.31		15.5186		-0.419694	-0.0038606	0.423555	0.757847	0.810988	0.791435
30193315	1	24261.8	52168.4	63756.9	80089	67247	85630		14.5664	15.6709	15.9603	16.2893	16.0372	16.3858		15.3992		-0.832796	0.271696	0.5611	0.890123	0.637989	0.986634
30193335	1	13328.8	15934.5	18937.2	16641.8	14694.1	21236.3		13.7023	13.9599	14.2089	14.0225	13.8429	14.3742		13.957		-0.254759	0.0028454	0.251914	0.0654997	-0.114074	0.417225
30193335	1	17755.8	20182	26457.1	22934.3	26170.9	24276.4		14.116	14.3008	14.6914	14.4852	14.6757	14.5673		14.3694		-0.253379	-0.0686024	0.321982	0.115834	0.306293	0.197881
30193335	1	15698.6	22625.4	28887	27021.6	31658	34637.6		13.9384	14.4657	14.8181	14.7218	14.9503	15.08		14.4074		-0.469029	0.0582772	0.410752	0.314446	0.542901	0.67267
30193335	1	26107.5	32099.7	42716.7	45328.8	42221.6	49985.4		14.6722	14.9703	15.3825	15.4681	15.3657	15.6092		15.0083		-0.336146	-0.0380473	0.374193	0.459821	0.357373	0.6009
30193335	1	56500.7	61619.4	92358	90707.5	80082.3	99177.7		15.786	15.9111	16.4949	16.4689	16.2892	16.5977		16.064		-0.278028	-0.152912	0.43094	0.404924	0.225186	0.533719
30193335	1	46984.3	72224.1	93591.7	108642	88643.9	115330		15.5199	16.1402	16.5141	16.7292	16.4357	16.8154		16.0581		-0.538167	0.0821329	0.456034	0.671163	0.377675	0.757353
30193340	1	1020.56	1650.13	1247.88	1854.66	959.392	1071.64		9.99515	10.6884	10.2853	10.8569	9.90598	10.0656		10.3229		-0.327775	0.365439	-0.0376636	0.534016	-0.416949	-0.257321
30193340	1	2881.79	4732.46	8585.08	6404.73	6578.25	5972.14		11.4928	12.2084	13.0676	12.6449	12.6835	12.544		12.2562		-0.763496	-0.047873	0.811369	0.388675	0.427241	0.287786
30193340	1	4822.76	5573.86	4108.59	7200.9	7001.99	8138.74		12.2356	12.4445	12.0044	12.814	12.7735	12.9906		12.2282		0.00746553	0.216285	-0.22375	0.585785	0.545372	0.762412
30193345	1	1644.37	990.442	3175.62	3686.51	2500.15	3753.64		10.6833	9.95193	11.6328	11.848	11.2878	11.8741		10.756		-0.0727044	-0.804095	0.8768	1.09202	0.531775	1.11805
30193345	1	7946.24	4315.85	10458	9057.69	10680.9	7938.78		12.9561	12.0754	13.3523	13.1449	13.3827	12.9547		12.7946		0.161456	-0.71917	0.557714	0.350327	0.588149	0.160101
30193345	1	17533.8	11057	12326.2	11589.5	15878.1	13747.3		14.0979	13.4327	13.5894	13.5005	13.9548	13.7469		13.7067		0.3912	-0.273982	-0.117218	-0.20612	0.248096	0.0402084
30193345	1	17380.2	13426.8	19159.3	19707	18888.9	20324.3		14.0852	13.7128	14.2258	14.2664	14.2053	14.3109		14.0079		0.0772442	-0.295088	0.217844	0.258506	0.197338	0.303004
30193345	1	11665.8	18188.1	16041.2	21550.2	20672.2	19611.2		13.51	14.1507	13.9695	14.3954	14.3354	14.2594		13.8767		-0.366734	0.273972	0.092762	0.518682	0.458673	0.382657
30193345	1	23044.7	34457.5	26099.4	36067.4	44133.2	23644		14.4921	15.0725	14.6717	15.1384	15.4296	14.5292		14.7455		-0.25332	0.327062	-0.073742	0.39294	0.684108	-0.216282
30193345	1	21167.8	22169.1	22085.2	20516.1	25307.6	25671.2		14.3696	14.4363	14.4308	14.3245	14.6273	14.6479		14.4122		-0.0426297	0.0240482	0.0185815	-0.087743	0.215072	0.235653
30193345	1	20834.9	18343.3	21955.8	25342.3	24712.9	25869.5		14.3467	14.163	14.4223	14.6293	14.593	14.659		14.3107		0.0360498	-0.147702	0.111652	0.318595	0.282311	0.3483
30193345	1	25048.3	26692.3	31011.8	31671.2	33121.2	29028		14.6124	14.7041	14.9205	14.9509	15.0155	14.8252		14.7457		-0.133272	-0.0415621	0.174834	0.205187	0.269769	0.079462
30193345	1	28165.1	29849.8	31752.2	34283.3	42643.1	39021.6		14.7816	14.8654	14.9546	15.0652	15.38	15.252		14.8672		-0.0855866	-0.00177635	0.0873629	0.19801	0.512816	0.384777
30193345	1	47842.1	23935.2	31038.8	33279.9	44591.8	32306.2		15.546	14.5468	14.9218	15.0224	15.4445	14.9795		15.0049		0.541119	-0.458031	-0.0830879	0.0174912	0.439615	-0.0253508
30193345	1	32955.1	45597.8	47681.7	55587.6	53102.4	53725.1		15.0082	15.4767	15.5411	15.7625	15.6965	15.7133		15.342		-0.3338	0.134664	0.199136	0.420461	0.354476	0.371295
30193345	1	33923.9	35658.2	45989.5	50424.6	53103.4	46029.8		15.05	15.1219	15.489	15.6218	15.6965	15.4903		15.2203		-0.170311	-0.0983804	0.268692	0.401515	0.47619	0.269953
30193345	1	38987	36753.8	37293	44185.3	51258	38216.3		15.2507	15.1656	15.1866	15.4313	15.6455	15.2219		15.201		0.0497287	-0.0353704	-0.0143583	0.230304	0.444513	0.0209262
30193345	1	165551	203542	214813	230762	284509	210207		17.3369	17.635	17.7127	17.816	18.1181	17.6815		17.5615		-0.224622	0.073434	0.151188	0.25451	0.55658	0.119918
30193365	1	56989.9	105547	70274.8	148457	97754.8	216806		15.7984	16.6875	16.1007	17.1797	16.5769	17.726		16.1956		-0.397136	0.491969	-0.0948332	0.984133	0.381327	1.53049
30193459	1	76470.1	46607.6	74225.7	57044.2	72427.3	57016.4		16.2226	15.5083	16.1796	15.7998	16.1442	15.7991		15.9702		0.252435	-0.461894	0.209459	-0.170381	0.174073	-0.171082
30193464	1	39006.9	18640.9	34193	33393.3	37385.8	51986		15.2514	14.1862	15.0614	15.0273	15.1902	15.6658		14.833		0.418427	-0.646829	0.228402	0.194259	0.357189	0.832823
30193464	1	35598.9	19696.4	33707.2	32518.7	37871	52270.3		15.1195	14.2656	15.0408	14.989	15.2088	15.6737		14.8087		0.310893	-0.543006	0.232113	0.180328	0.400153	0.86505
30193464	1	36666.2	32693.8	50579.9	44862.5	40013.7	61912.8		15.1622	14.9967	15.6263	15.4532	15.2882	15.918		15.2617		-0.0995591	-0.264993	0.364552	0.1915	0.0264824	0.656227
30193491	1	21533.6	20208.2	28735.7	26670.8	27078.2	24441.4		14.3943	14.3027	14.8106	14.703	14.7248	14.577		14.5025		-0.108202	-0.199849	0.308051	0.200468	0.222341	0.0745376
30193491	1	72847	67917.1	72429.4	80050.6	108337	94693		16.1526	16.0515	16.1443	16.2886	16.7252	16.531		16.1161		0.0364634	-0.064632	0.0281686	0.172506	0.609041	0.414851
30193547	1	2157.72	5665.18	3948.25	5050.03	5577.69	5849.77		11.0753	12.4679	11.947	12.3021	12.4455	12.5142		11.8301		-0.754771	0.637839	0.116932	0.472009	0.615386	0.684097
30193558	1	1742.97	2567.66	3180.19	2735.16	4111.18	4786.46		10.7673	11.3262	11.6349	11.4174	12.0053	12.2247		11.2428		-0.475493	0.0834181	0.392075	0.174586	0.762515	0.981921
30193558	1	3935.15	3859.22	5938.79	5372.8	5369.94	6835.83		11.9422	11.9141	12.536	12.3915	12.3907	12.7389		12.1307		-0.188549	-0.216655	0.405203	0.260708	0.259942	0.608151
30193558	1	4625.57	10404.8	12150.4	12690.2	7661.24	11895.1		12.1754	13.345	13.5687	13.6314	12.9034	13.5381		13.0297		-0.854284	0.315265	0.539019	0.601723	-0.126337	0.508379
30193558	1	6928.86	7671.86	10576.5	8096.21	8840.19	11628.1		12.7584	12.9054	13.3686	12.983	13.1099	13.5053		13.0108		-0.252378	-0.105419	0.357796	-0.0277473	0.0990828	0.494543
30193558	1	8403.7	10827.3	13353	12306.5	12785	15973.9		13.0368	13.4024	13.7049	13.5871	13.6422	13.9634		13.3814		-0.344547	0.0210309	0.323516	0.205772	0.260812	0.582072
30193558	1	9290.26	14060.6	14758.4	11519.6	13219.7	14734.3		13.1815	13.7794	13.8492	13.4918	13.6904	13.8469		13.6034		-0.42187	0.175998	0.245873	-0.111569	0.0870299	0.243512
30193558	1	12974.8	9966.21	15717.5	11746.3	13029.5	14054		13.6634	13.2828	13.9401	13.5199	13.6695	13.7787		13.6288		0.0346452	-0.345949	0.311304	-0.108863	0.0407133	0.149909
30193558	1	18012.5	20084.3	25210.7	20053.1	22158.5	23625.8		14.1367	14.2938	14.6217	14.2915	14.4356	14.5281		14.3507		-0.214036	-0.0569656	0.271001	-0.0592066	0.0848299	0.177329
30193558	1	21104.3	33653.9	39544.5	30053.6	36860.8	32214.9		14.3652	15.0385	15.2712	14.8752	15.1698	14.9754		14.8916		-0.526395	0.146846	0.379549	-0.0163918	0.278157	0.0837997
30193562	1	46619.8	72118.6	77176.1	61509.9	94602.6	79381.1		15.5087	16.1381	16.2359	15.9085	16.5296	16.2765		15.9609		-0.452214	0.177215	0.274999	-0.0523366	0.568724	0.31564
30193575	1	6583.56	1567.23	5769.44	3648.37	6011.88	3410.81		12.6847	10.614	12.4942	11.833	12.5536	11.7359		11.931		0.753695	-1.31695	0.563258	-0.0979212	0.622643	-0.19506
30193575	1	10847.2	4340.29	8356.31	3954.43	9459.07	6551.8		13.405	12.0836	13.0287	11.9493	13.2075	12.6777		12.8391		0.565947	-0.75551	0.189564	-0.889832	0.368396	-0.161412
30193575	1	12577.2	7176.26	10997.3	8784.56	16770	10872.1		13.6185	12.809	13.4249	13.1008	14.0336	13.4083		13.2841		0.334389	-0.475117	0.140729	-0.18338	0.749459	0.124208
30193584	1	3344.06	3445.6	5855.66	3901.9	3429.09	4194.02		11.7074	11.7505	12.5156	11.93	11.7436	12.0341		11.9912		-0.283794	-0.240641	0.524436	-0.061219	-0.24757	0.0429402
30193584	1	5361.52	3921.28	5179.86	5185.99	2582.15	4618.18		12.3884	11.9371	12.3387	12.3404	11.3344	12.1731		12.2214		0.167014	-0.284301	0.117287	0.118991	-0.887054	-0.0483037
30193584	1	6189.95	5531.27	9113.99	6736.79	6460.01	5980.81		12.5957	12.4334	13.1539	12.7178	12.6573	12.5461		12.7277		-0.131946	-0.294264	0.426209	-0.00981204	-0.0703364	-0.181533
30193584	1	5762.84	5946.59	11033.5	6323.47	5308.94	5883.59		12.4926	12.5378	13.4296	12.6265	12.3742	12.5225		12.82		-0.327439	-0.282159	0.609598	-0.193503	-0.445797	-0.297523
30193584	1	6921.53	5504.69	11504	7530.85	8424.54	8712.97		12.7569	12.4264	13.4898	12.8786	13.0404	13.0889		12.8911		-0.134181	-0.46461	0.598791	-0.0124578	0.149327	0.197893
30193584	1	8945.67	9822.29	18194.1	12432.5	9666.38	7659.53		13.127	13.2618	14.1512	13.6018	13.2388	12.903		13.5133		-0.386359	-0.25149	0.637849	0.0884985	-0.274573	-0.610294
30193584	1	13471.4	14974.7	24194.2	16291.1	15537.7	18741.8		13.7176	13.8702	14.5624	13.9918	13.9235	14.194		14.0501		-0.332464	-0.179837	0.512301	-0.0582811	-0.126589	0.143896
30193584	1	13836.9	16654.1	30430.3	14948.3	16442.3	17508.4		13.7562	14.0236	14.8932	13.8677	14.0051	14.0958		14.2243		-0.468118	-0.200755	0.668873	-0.356658	-0.219224	-0.128592
30193584	1	38511.1	27734.9	44390.2	24866.7	29732.8	27429.4		15.233	14.7594	15.438	14.6019	14.8598	14.7434		15.1435		0.0895348	-0.384036	0.294502	-0.541525	-0.283686	-0.400019
30193584	1	35149.8	38705.5	45312.5	28959.6	31474.8	32774.1		15.1012	15.2402	15.4676	14.8218	14.9419	15.0003		15.2697		-0.16847	-0.0294512	0.197921	-0.447948	-0.327791	-0.269431
30193584	1	30770.1	27684.6	31515.7	43941.8	35434.5	43179.3		14.9092	14.7568	14.9438	15.4233	15.1129	15.3981		14.8699		0.0393008	-0.113143	0.0738425	0.553363	0.242925	0.528111
30193584	1	36997.1	33929.3	43860	30352.9	32547.9	34044.8		15.1751	15.0502	15.4206	14.8895	14.9903	15.0551		15.2153		-0.0402034	-0.165086	0.20529	-0.325782	-0.225054	-0.160181
30193631	1	10245.7	16293.9	15567.9	15224.2	15188.1	16870.7		13.3227	13.992	13.9263	13.8941	13.8907	14.0422		13.747		-0.424287	0.245018	0.179268	0.147055	0.143628	0.29521
30193652	1	10818.2	13079.4	15887.2	11019.4	16798.3	10544.3		13.4012	13.675	13.9556	13.4278	14.036	13.3642		13.6773		-0.276081	-0.00224344	0.278324	-0.249495	0.358772	-0.313082
30193683	1	2498.9	2113.3	2442.05	2478.99	1926.99	3859.86		11.2871	11.0453	11.2539	11.2755	10.9121	11.9143		11.1954		0.0916688	-0.150132	0.0584637	0.0801244	-0.283275	0.718922
30193683	1	2457.26	2890.73	4722.81	4564.52	4273.59	6927.9		11.2628	11.4972	12.2054	12.1562	12.0612	12.7582		11.6552		-0.392327	-0.157942	0.550269	0.501088	0.406071	1.10304
30193683	1	6235.31	3339.62	2896.6	4142.46	3696.25	5692.19		12.6062	11.7055	11.5001	12.0163	11.8518	12.4748		11.9373		0.668958	-0.231818	-0.43714	0.0789832	-0.0854415	0.53748
30193683	1	8784.61	2618.5	3710.46	3676.67	6942.56	5102.15		13.1008	11.3545	11.8574	11.8442	12.7613	12.3169		12.1042		0.996539	-0.749698	-0.246841	-0.260038	0.657028	0.212668
30193683	1	9928.64	9773.13	12153.8	14195.3	15481.5	19950.1		13.2774	13.2546	13.5691	13.7931	13.9183	14.2841		13.367		-0.0896534	-0.112429	0.202083	0.426087	0.551226	0.917072
30193683	1	61565.2	35964.3	39416.7	30605.8	41433.1	47421.2		15.9098	15.1343	15.2665	14.9015	15.3385	15.5332		15.4369		0.472953	-0.302597	-0.170356	-0.535359	-0.0983789	0.0963699
30193683	1	206901	125235	186284	152236	187691	210186		17.6586	16.9343	17.5071	17.216	17.518	17.6813		17.3667		0.29191	-0.432389	0.140479	-0.150715	0.15133	0.314641
30193703	1	14624.5	19605.7	18472	20444.1	23016.4	26756.1		13.8361	14.259	14.1731	14.3194	14.4904	14.7076		14.0894		-0.253279	0.169606	0.0836735	0.23002	0.400992	0.618199
30193716	1	32304.8	50460.2	54881	48001.9	56931.3	64039.2		14.9795	15.6229	15.744	15.5508	15.7969	15.9667		15.4488		-0.469319	0.17408	0.295239	0.102026	0.348156	0.517888
[truncated: 26,649 more rows]

## Sheet: Root elongation raw data
Supplemental Table S2-2. The abundance value of peptides detected from the 400 µM Al treated root elongation/ maturation zones in switchgrass
		Raw data								log2 transformation of raw data							Mean of control			log2 fold change
Protein Accession	pep_isunique	126	128n	129n	128c	129c	127n	127c		126	128n	129n	128c	129c	127n					126	128n	129n	128c	129c	127n
30185000	1	980.928	2762.24	2240.04	3878.3	3312.05	1917.18	2486.93		9.938	11.4316	11.1293	11.9212	11.6935	10.9048		10.833			-0.894975	0.598646	0.296329	1.08823	0.860531	0.0717933
30185000	1	4647.38	6172.3	4604.57	4991.65	5031.6	3128.56	4102.36		12.1822	12.5916	12.1689	12.2853	12.2968	11.6113		12.3142			-0.132013	0.277378	-0.145364	-0.0289136	-0.0174137	-0.702932
30185000	1	5244.84	2740.92	5192.41	2886.62	3232.95	2837.42	4877.17		12.3567	11.4204	12.3422	11.4952	11.6586	11.4704		12.0398			0.316911	-0.619328	0.302416	-0.544606	-0.381137	-0.569409
30185000	1	6794.57	7590.03	7199.54	8966.69	5958.84	6045.34	8236.27		12.7302	12.8899	12.8137	13.1304	12.5408	12.5616		12.8112			-0.0810816	0.0786412	0.00244033	0.319112	-0.270432	-0.249641
30185070	1	2173.55	1841.55	813.761	749.088	328.95	610.904	2301.68		11.0858	10.8467	9.66846	9.54899	8.36172	9.2548		10.5337			0.552171	0.313035	-0.865206	-0.984677	-2.17194	-1.27887
30185070	1	2058.91	2028.44	2496.7	2192.89	1689.96	2108.02	2354.48		11.0077	10.9862	11.2858	11.0986	10.7228	11.0417		11.0932			-0.0855446	-0.107055	0.1926	0.00540927	-0.370433	-0.0515316
30185070	1	2281.22	2209.8	2223.91	2241.66	1561.61	2006.35	2699.68		11.1556	11.1097	11.1189	11.1304	10.6088	10.9704		11.1281			0.0275339	-0.0183595	-0.00917438	0.0022946	-0.51924	-0.157699
30185070	1	3967.59	4207.13	6218.77	4547.07	2841.61	4526.29	5095.43		11.954	12.0386	12.6024	12.1507	11.4725	12.1441		12.1984			-0.244314	-0.15974	0.404053	-0.0476386	-0.725869	-0.0542459
30185070	1	4264.7	4909.25	3876.37	4311.36	3548.19	3355.44	5246.38		12.0582	12.2613	11.9205	12.0739	11.7929	11.7123		12.08			-0.0217741	0.181284	-0.15951	-0.00607417	-0.287135	-0.367713
30185070	1	5352.53	5740.77	5918.18	5456.83	3411.16	2865.65	5449.31		12.386	12.487	12.5309	12.4138	11.736	11.4846		12.468			-0.0819851	0.019038	0.0629471	-0.0541425	-0.731945	-0.983343
30185070	1	5857.61	6479.78	6938.75	4953.47	4489.77	4783.74	6561.99		12.5161	12.6617	12.7605	12.2742	12.1324	12.2239		12.6461			-0.129999	0.0156342	0.114365	-0.371872	-0.51367	-0.422171
30185073	1	2748.31	3685.47	5671.39	3026.8	1924.22	3595.29	3958.3		11.4243	11.8476	12.4695	11.5636	10.9101	11.8119		11.9138			-0.489485	-0.0661847	0.55567	-0.35024	-1.00376	-0.101922
30185111	1	3576.24	2906.7	4352.36	3910.07	2422.19	4087.04	4521.49		11.8042	11.5052	12.0876	11.933	11.2421	11.9968		11.799			0.00523476	-0.293827	0.288592	0.133986	-0.556893	0.197849
30185142	1	2344.33	874.75	2646.13	1975.89	2098.95	2447.28	2320.27		11.195	9.77273	11.3697	10.9483	11.0355	11.257		10.7791			0.415841	-1.00639	0.59055	0.169171	0.256335	0.477845
30185142	1	3002.05	3378.59	3986.11	5916.34	3033.01	2844.05	4087.31		11.5517	11.7222	11.9608	12.5305	11.5665	11.4737		11.7449			-0.193169	-0.0226952	0.215864	0.785588	-0.178365	-0.271173
30185142	1	3455.03	2438.7	4357.6	5717.96	3752.11	3672	5902.69		11.7545	11.2519	12.0893	12.4813	11.8735	11.8424		11.6986			0.0559182	-0.446669	0.390751	0.78272	0.174921	0.143785
30185142	1	6214.32	4700.81	6788.87	11547.6	5523.68	4791.74	9282.58		12.6014	12.1987	12.729	13.4953	12.4314	12.2263		12.5097			0.091704	-0.310983	0.219279	0.985632	-0.078261	-0.283342
30185142	1	8175.63	9837.9	8651.38	12299	9974.52	6707.9	9803.88		12.9971	13.2641	13.0787	13.5863	13.284	12.7116		13.1133			-0.116206	0.150814	-0.0346073	0.472936	0.170711	-0.401676
30185142	1	9615.74	10786.2	11149.1	15431.3	9280.27	7808.99	12958.6		13.2312	13.3969	13.4446	13.9136	13.18	12.9309		13.3576			-0.126391	0.0393268	0.0870638	0.555997	-0.177622	-0.426652
30185142	1	13618.7	14889.2	12237.9	21492.6	13970	9221.63	19598.7		13.7333	13.862	13.5791	14.3916	13.77	13.1708		13.7248			0.0085181	0.137199	-0.145717	0.666773	0.045261	-0.553977
30185142	1	19672	23666.6	19859.6	34064.3	22134.2	19736.4	25883.2		14.2639	14.5306	14.2776	15.056	14.434	14.2686		14.3573			-0.0934683	0.173242	-0.0797733	0.698648	0.0766636	-0.0887557
30185142	1	24961.1	29807.3	28256	27065.6	21391.3	21660.9	31669.9		14.6074	14.8634	14.7863	14.7242	14.3847	14.4028		14.7523			-0.144955	0.111032	0.0339234	-0.0281743	-0.367608	-0.349544
30185142	1	41264	37492.5	42031.1	60442.8	39923.1	28767.2	47248.9		15.3326	15.1943	15.3592	15.8833	15.2849	14.8121		15.2954			0.0372363	-0.101046	0.0638094	0.587924	-0.0104253	-0.483222
30185142	1	41571.3	44421.4	38972.9	59101.3	41196.1	29633.6	58065.5		15.3433	15.439	15.2502	15.8509	15.3302	14.8549		15.3442			-0.000850748	0.0948163	-0.0939656	0.506753	-0.0139306	-0.489204
30185142	1	58905.3	64693.2	56656.3	97392.8	61053.4	47314.2	73574.7		15.8461	15.9813	15.7899	16.5715	15.8978	15.53		15.8725			-0.0263511	0.108865	-0.0825135	0.699066	0.0253217	-0.342476
30185151	1	1216.21	2325.52	2265.23	1017.34	587.105	774.829	1177.38		10.2482	11.1833	11.1454	9.99059	9.19747	9.59773		10.859			-0.610809	0.324353	0.286457	-0.868397	-1.66151	-1.26125
30185151	1	2498.2	2694.39	2312.87	2444.12	1821.18	2007.57	2007.41		11.2867	11.3957	11.1755	11.2551	10.8307	10.9712		11.286			0.000712727	0.109782	-0.110495	-0.0308592	-0.455301	-0.31473
30185151	1	2185.3	2115.79	2034.2	2110.5	831.71	2182.85	2040.86		11.0936	11.047	10.9902	11.0434	9.69994	11.092		11.0436			0.0500021	0.00336674	-0.0533688	-0.000241867	-1.34368	0.0483823
30185151	1	1227.41	3386.88	790.877	2962.02	523.376	1723.39	2568.25		10.2614	11.7257	9.62731	11.5324	9.0317	10.751		10.5381			-0.276751	1.18759	-0.910841	0.994217	-1.50645	0.212883
30185151	1	3341.57	4289.9	6759.38	4383.3	4308.26	4072.86	4934.18		11.7063	12.0667	12.7227	12.0978	12.0729	11.9918		12.1652			-0.458928	-0.0985083	0.557436	-0.0674349	-0.0923493	-0.173412
30185151	1	3720.67	4867.9	4988.88	5804.8	4015.57	4658.59	5365.43		11.8613	12.2491	12.2845	12.503	11.9714	12.1857		12.1316			-0.270297	0.11744	0.152857	0.371387	-0.160254	0.0540333
30185151	1	6963.76	7369.05	8136.32	7085.81	7078.65	7460.5	7339.65		12.7657	12.8473	12.9902	12.7907	12.7893	12.8651		12.8677			-0.102041	-0.020429	0.12247	-0.0769747	-0.0784325	-0.00263543
30185151	1	9006.2	10158.1	12998.1	8045.55	11268	7571.81	13792.8		13.1367	13.3103	13.666	12.974	13.4599	12.8864		13.371			-0.234318	-0.0606777	0.294996	-0.397046	0.0889288	-0.484598
30185155	1	2861.56	2381.8	3930.93	3036.85	2892.62	841.207	3831.69		11.4826	11.2178	11.9407	11.5684	11.4982	9.71632		11.547			-0.0644386	-0.32919	0.393629	0.0213327	-0.0488677	-1.83071
30185155	1	8011.73	7498.06	8919.61	10383.4	4999.27	8341.44	12703.2		12.9679	12.8723	13.1228	13.342	12.2875	13.0261		12.9877			-0.0197563	-0.115354	0.13511	0.354341	-0.700153	0.0384266
30185168	1	1114.9	873.814	2055.94	2847.66	896.383	1057.58	974.953		10.1227	9.77118	11.0056	11.4756	9.80797	10.0466		10.2998			-0.177122	-0.528638	0.70576	1.17574	-0.49185	-0.253265
30185168	1	1011.02	2148.86	2429.2	954.13	1718.46	757.333	2338.16		9.98159	11.0694	11.2463	9.89804	10.7469	9.56478		10.7657			-0.784148	0.303621	0.480527	-0.867695	-0.0188375	-1.20095
30185168	1	3772.71	3730.82	3414.73	4558.73	3216.32	4886.11	5453.27		11.8814	11.8653	11.7376	12.1544	11.6512	12.2545		11.8281			0.053314	0.0372036	-0.0905176	0.326342	-0.176876	0.426396
30185168	1	14665.7	14186.7	12759.7	16444.4	14453	12462.2	19303.8		13.8402	13.7923	13.6393	14.0053	13.8191	13.6053		13.7572			0.0829173	0.0350121	-0.117929	0.248065	0.0618442	-0.151965
30185168	1	25354.9	27268.4	29477.4	30451.2	26497.2	30341.1	38651.4		14.63	14.7349	14.8473	14.8942	14.6936	14.889		14.7374			-0.107438	-0.00247047	0.109908	0.156796	-0.0438609	0.151573
30185180	1	5663.1	7856.64	6977.74	10369.1	7698.12	7229.71	9631.25		12.4674	12.9397	12.7685	13.34	12.9103	12.8197		12.7252			-0.257829	0.214491	0.0433382	0.614801	0.185086	0.0945165
30185183	1	489.64	1172.62	365.067	347.728	242.52	572.633	450.789		8.93558	10.1955	8.51202	8.44182	7.92196	9.16147		9.21437			-0.278793	0.981147	-0.702354	-0.772555	-1.29241	-0.0529036
30185183	1	7563.84	8214.98	9759.77	9398.28	5423.97	7026.35	8001.17		12.8849	13.004	13.2526	13.1982	12.4051	12.7786		13.0472			-0.162289	-0.0431497	0.205439	0.15099	-0.642058	-0.268631
30185204	1	914.985	2830.49	2843.66	896.03	2079.96	1878.76	2843.72		9.8376	11.4668	11.4735	9.8074	11.0223	10.8756		10.926			-1.08839	0.540846	0.54754	-1.11859	0.0963517	-0.050426
30185249	1	635.613	476.225	411.763	456.38	539.198	807.846	1198.58		9.31201	8.8955	8.68567	8.83409	9.07467	9.65794		8.96439			0.347615	-0.0688924	-0.278722	-0.130298	0.11028	0.693546
30185249	1	2276.99	661.619	613.961	3038.97	2064.04	3009.38	4177.47		11.1529	9.36986	9.262	11.5694	11.0113	11.5553		9.92826			1.22465	-0.558401	-0.666254	1.64111	1.083	1.627
30185249	1	4434.96	7319.29	7091.63	8176.3	4873.94	6462.65	10213.1		12.1147	12.8375	12.7919	12.9972	12.2509	12.6579		12.5814			-0.466659	0.256122	0.210536	0.415866	-0.330493	0.0765453
30185249	1	5485.99	8379.88	8260.65	11230	7516.08	9322.22	12472.1		12.4215	13.0327	13.012	13.4551	12.8758	13.1865		12.8221			-0.40056	0.210617	0.189943	0.632975	0.0536679	0.364362
30185261	1	18088.3	13044.6	21697.5	18969.3	16719.2	21166.6	25140.7		14.1428	13.6712	14.4052	14.2114	14.0292	14.3695		14.0731			0.0697127	-0.401897	0.332185	0.13832	-0.0438377	0.296441
30185405	1	4778.52	3630.42	3121.3	9308.11	2684.32	838.041	5842.41		12.2223	11.8259	11.6079	13.1843	11.3903	9.71088		11.8854			0.336949	-0.0594804	-0.277468	1.29887	-0.49506	-2.17452
30185460	1	733.668	595.285	2345.99	2605.47	1561.61	451.96	2548.65		9.51898	9.21744	11.196	11.3473	10.6088	8.82005		9.97747			-0.458484	-0.760031	1.21851	1.36986	0.63135	-1.15742
30185460	1	1046.06	2090.13	3713.16	5551.55	1344.83	4176.03	6263.55		10.0307	11.0294	11.8584	12.4387	10.3932	12.0279		10.9729			-0.942104	0.0565253	0.885579	1.46582	-0.579644	1.05506
30185460	1	2149.28	2611.91	5874.62	7327.81	2524.47	5904.34	8459.34		11.0696	11.3509	12.5203	12.8392	11.3018	12.5276		11.6469			-0.5773	-0.296044	0.873344	1.19223	-0.345172	0.880624
30185460	1	3267.27	2126.33	3939.44	6451.63	1998.95	3764.74	8494.08		11.6739	11.0541	11.9438	12.6554	10.965	11.8783		11.5573			0.116605	-0.503115	0.38651	1.09819	-0.592239	0.321071
30185460	1	2157.42	2513.75	3949.04	5711.64	1520.56	3568.32	9312.37		11.0751	11.2956	11.9473	12.4797	10.5704	11.801		11.4393			-0.364243	-0.143709	0.507952	1.04036	-0.86895	0.361696
30185460	1	3786.73	5784.52	6959.46	12057.5	1970.72	6507.36	13652.4		11.8867	12.498	12.7648	13.5576	10.9445	12.6679		12.3832			-0.496423	0.114822	0.381601	1.17449	-1.43865	0.284699
30185460	1	3958.65	6261.13	9219.4	14455.5	3916.43	7718.94	17432.1		11.9508	12.6122	13.1705	13.8193	11.9353	12.9142		12.5778			-0.627026	0.0343881	0.592638	1.24151	-0.642497	0.336367
30185460	1	8502.43	5788.44	10947.3	16826.9	4341.34	10276.6	19853		13.0537	12.499	13.4183	14.0385	12.0839	13.3271		12.9903			0.0633594	-0.491341	0.427982	1.04818	-0.906376	0.33678
30185460	1	9382.26	9676.11	17326.8	28713.5	6523.46	14891.4	37835.7		13.1957	13.2402	14.0807	14.8094	12.6714	13.8622		13.5056			-0.309832	-0.265339	0.575171	1.30389	-0.834129	0.35664
30185471	1	5179.96	4084.11	5065.47	4880.22	2982.62	4145.37	7491.82		12.3387	11.9958	12.3065	12.2527	11.5424	12.0173		12.2137			0.125054	-0.217865	0.0928109	0.0390614	-0.671304	-0.196384
30185480	1	2687.55	5076.29	3758.72	5548.24	5036.83	2380.19	3601.82		11.3921	12.3096	11.876	12.4378	12.2983	11.2169		11.8592			-0.467145	0.450339	0.0168065	0.578594	0.439079	-0.642357
30185525	1	733.783	590.285	518.274	1047.55	743.444	1230.51	759.258		9.51921	9.20527	9.01757	10.0328	9.53808	10.265		9.24735			0.27186	-0.042081	-0.229779	0.785451	0.290731	1.01769
30185525	1	903.415	855.901	803.365	2068.16	1450.32	1195.96	844.594		9.81924	9.7413	9.64991	11.0141	10.5022	10.224		9.73682			0.0824258	0.00448101	-0.0869068	1.27732	0.765338	0.487132
30185525	1	3439.91	3428.06	2244.87	4002.53	2759.95	3806.4	3497.37		11.7482	11.7432	11.1324	11.9667	11.4304	11.8942		11.5412			0.206907	0.201927	-0.408834	0.425447	-0.110825	0.352963
30185525	1	772.628	3433.45	2298.44	2619.92	2379.27	2052.18	4251.54		9.59363	11.7454	11.1664	11.3553	11.2163	11.0029		10.8352			-1.24154	0.910274	0.331267	0.520133	0.38113	0.167769
30185525	1	4074.79	3550.69	3985.92	5392.86	2635.64	2719.41	4415.37		11.9925	11.7939	11.9607	12.3968	11.3639	11.4091		11.9157			0.0768138	-0.121813	0.0449991	0.481138	-0.551759	-0.506619
30185525	1	2693.72	1997.54	3117.15	3640.37	3071.57	3141.7	4655.42		11.3954	10.964	11.606	11.8299	11.5848	11.6173		11.3218			0.0735834	-0.357795	0.284211	0.508069	0.26296	0.295528
30185525	1	3394.27	4315.23	2851.2	4220.17	2432.12	2547.89	5318.08		11.7289	12.0752	11.4774	12.0431	11.248	11.3151		11.7605			-0.0315994	0.314734	-0.283135	0.282599	-0.512486	-0.445399
30185525	1	8386.68	8942.38	9488.92	11441.8	8544.2	5434.15	15446.7		13.0339	13.1264	13.212	13.482	13.0607	12.4078		13.1241			-0.0902342	0.00232469	0.0879095	0.357911	-0.0633897	-0.716281
30185525	1	13904.6	14193.5	10236.9	13029.1	11196.8	11565.6	20172.5		13.7633	13.7929	13.3215	13.6694	13.4508	13.4976		13.6259			0.137371	0.167038	-0.304409	0.0435395	-0.175109	-0.128355
30185542	1	17145.5	17381.2	17483.4	27025.6	20721.5	22134.7	33881.1		14.0655	14.0852	14.0937	14.722	14.3388	14.434		14.0815			-0.0159487	0.00374455	0.0122041	0.640543	0.257349	0.352529
30185542	1	45640.1	40803	33021.7	63934.3	43216.1	45701.8	61062.6		15.478	15.3164	15.0111	15.9643	15.3993	15.48		15.2685			0.209504	0.0478776	-0.257382	0.695795	0.130772	0.211454
30185552	1	2195.69	924.276	1933.06	2744.44	742.167	1082.98	2125.23		11.1005	9.85218	10.9167	11.4223	9.5356	10.0808		10.6231			0.477358	-0.770924	0.293566	0.799195	-1.0875	-0.542312
30185552	1	1557.8	651.06	1474.65	3017.76	477.95	694.767	2159.61		10.6053	9.34665	10.5262	11.5593	8.90071	9.44038		10.1594			0.445928	-0.812716	0.366788	1.3999	-1.25865	-0.718979
30185552	1	2970.43	1536.88	3347.57	3531.37	346.149	3107.27	2378.4		11.5365	10.5858	11.7089	11.786	8.43525	11.6014		11.277			0.259408	-0.691258	0.43185	0.508965	-2.8418	0.324384
30185565	1	1163.44	1839.15	2285.98	3443.15	1945.23	2197.19	2347.51		10.1842	10.8448	11.1586	11.7495	10.9257	11.1014		10.7292			-0.545022	0.115626	0.429396	1.02031	0.196524	0.372241
30185574	1	971.468	753.125	966.926	1959.29	1944.68	1070.88	850.783		9.92402	9.55675	9.91726	10.9361	10.9253	10.0646		9.79934			0.12468	-0.242598	0.117918	1.13677	1.12597	0.265232
30185574	1	677.253	875.164	1297.49	1900.62	1356.31	551.113	2071.62		9.40355	9.77341	10.3415	10.8923	10.4055	9.1062		9.83949			-0.43594	-0.0660802	0.50202	1.05276	0.565978	-0.733286
30185574	1	7341.12	6149.57	10266.7	10274.7	7227.87	8559.97	15731.9		12.8418	12.5863	13.3257	13.3268	12.8194	13.0634		12.9179			-0.0761265	-0.331641	0.407767	0.408894	-0.0985558	0.14548
30185591	1	14662	16483.5	18890.3	12505.2	11950.5	18342.7	16800.9		13.8398	14.0087	14.2054	13.6102	13.5448	14.1629		14.018			-0.178169	-0.00922468	0.187394	-0.407719	-0.47318	0.144959
30185591	1	22060.2	23623.4	23262.9	17027	14537.2	20947.7	21389.3		14.4292	14.5279	14.5057	14.0555	13.8275	14.3545		14.4876			-0.0584509	0.0403197	0.0181312	-0.432069	-0.660145	-0.133105
30185591	1	32848	34433.7	35722.9	25041.3	25958.9	39936.9	34257.6		15.0035	15.0715	15.1246	14.612	14.6639	15.2854		15.0665			-0.0630202	0.00499647	0.0580237	-0.454516	-0.402599	0.218894
30185592	1	3965.72	5211.66	5081.31	10156.1	1215.24	3286.29	5293.33		11.9534	12.3475	12.311	13.3101	10.247	11.6822		12.204			-0.250591	0.143567	0.107024	1.1061	-1.95694	-0.521714
30185603	1	3749.53	3260.14	3337.75	6180.54	2530.76	3955.88	3529.12		11.8725	11.6707	11.7047	12.5935	11.3054	11.9498		11.7493			0.123203	-0.0785743	-0.0446291	0.844227	-0.443938	0.20049
30185603	1	5475.07	7370.47	6306.41	14947.6	5108.97	9926.87	11111.6		12.4187	12.8475	12.6226	13.8676	12.3188	13.2771		12.6296			-0.210941	0.217939	-0.00699794	1.23802	-0.310786	0.64752
30185607	1	975.891	950.143	669.657	2205.53	870.529	2170.42	1014.76		9.93058	9.892	9.38728	11.1069	9.76575	11.0838		9.73662			0.193958	0.155382	-0.34934	1.37029	0.0291294	1.34714
30185607	1	2397.77	553.653	2253.75	2234.98	638.547	1971.06	2026.32		11.2275	9.11284	11.1381	11.126	9.31865	10.9448		10.4928			0.734667	-1.37997	0.645303	0.633237	-1.17416	0.451951
30185607	1	1053.83	1635.66	2504.08	1539.41	725.016	2953.52	2107.74		10.0414	10.6757	11.2901	10.5882	9.50187	11.5282		10.669			-0.627623	0.00660656	0.621016	-0.0808856	-1.16718	0.859173
30185607	1	1251.74	941.77	671.509	789.825	947.905	2542.02	2309.12		10.2897	9.87923	9.39126	9.62539	9.8886	11.3118		9.8534			0.436313	0.0258272	-0.46214	-0.228014	0.0351961	1.45836
30185607	1	3130.87	3645.63	2783.29	2820.27	2199.46	3963.59	2469.15		11.6123	11.832	11.4426	11.4616	11.1029	11.9526		11.629			-0.0166114	0.202993	-0.186382	-0.167342	-0.526025	0.323632
30185607	1	2668.11	2618.3	2780.48	2312.93	2231.91	3444.89	2824.9		11.3816	11.3544	11.4411	11.1755	11.1241	11.7502		11.3924			-0.0107744	-0.0379663	0.0487407	-0.216874	-0.268316	0.357864
30185607	1	4711.43	3182.46	4382.9	4483.79	2839.21	5546.51	4623.27		12.2019	11.6359	12.0977	12.1305	11.4713	12.4374		11.9785			0.223433	-0.342588	0.119156	0.151986	-0.50724	0.458848
30185607	1	390130	304537	595162	408845	310474	602907	451615		18.5736	18.2163	19.1829	18.6412	18.2441	19.2016		18.6576			-0.083996	-0.441333	0.525329	-0.0163973	-0.413482	0.543982
30185615	1	497.163	597.209	2120.1	2013.28	1861.72	2635.91	2452.54		8.95757	9.22209	11.0499	10.9753	10.8624	11.3641		9.74319			-0.78562	-0.521103	1.30672	1.23214	1.11923	1.62089
30185615	1	5251.46	5856.9	6329.97	8929.08	7669.84	4908.05	8703.07		12.3585	12.5159	12.628	13.1243	12.905	12.2609		12.5008			-0.142299	0.0151189	0.12718	0.623495	0.404179	-0.239867
30185615	1	6903.72	7836.36	7141.67	14511.8	8767.75	6076.25	10701.7		12.7532	12.936	12.802	13.8249	13.098	12.569		12.8304			-0.0772325	0.105578	-0.0283457	0.994545	0.267601	-0.261426
30185615	1	8889.2	8132.91	13731.2	11962.5	11098.1	12576.8	13231.7		13.1178	12.9896	13.7452	13.5462	13.438	13.6185		13.2842			-0.166349	-0.294631	0.46098	0.262049	0.153833	0.334288
30185615	1	37963.7	40847.4	33565.2	65876.8	53198	45249.5	57961.5		15.2123	15.318	15.0347	16.0075	15.6991	15.4656		15.1883			0.0240104	0.129634	-0.153644	0.819161	0.510762	0.277293
30185618	1	2087.23	380.78	433.363	1058.63	552.486	907.16	1009.26		11.0274	8.57281	8.75943	10.048	9.10979	9.82521		9.45321			1.57417	-0.880394	-0.693775	0.59478	-0.343415	0.372005
30185618	1	641.243	650.102	585.537	509.538	683.527	633.711	1241.17		9.32473	9.34452	9.19362	8.99305	9.41685	9.30768		9.28762			0.0371054	0.0569003	-0.0940057	-0.294576	0.129231	0.0200581
30185618	1	1237.12	926.982	1728.86	2934.81	766.889	891.857	2653.97		10.2728	9.8564	10.7556	11.5191	9.58287	9.80067		10.2949			-0.0221552	-0.438527	0.460683	1.22413	-0.712051	-0.494256
30185618	1	3146.35	2199.61	3910	2899.82	2153.68	4461.35	2972.85		11.6195	11.103	11.933	11.5017	11.0726	12.1233		11.5518			0.0676466	-0.448784	0.381138	-0.050069	-0.479226	0.571447
30185618	1	3652.78	3930.73	2792.65	4152.88	2296.57	5269.5	5094.66		11.8348	11.9406	11.4474	12.0199	11.1653	12.3634		11.7409			0.0938529	0.199654	-0.293507	0.278969	-0.575663	0.622523
30185618	1	5946.9	4450.71	5848.7	7705.57	4690.54	7333.03	5716.39		12.5379	12.1198	12.5139	12.9117	12.1955	12.8402		12.3905			0.147375	-0.270726	0.123352	0.521139	-0.195008	0.449647
30185618	1	4746.48	3973.91	4040	3937.41	3211.31	6901.41	7530.43		12.2126	11.9563	11.9801	11.943	11.6489	12.7527		12.0497			0.162935	-0.0933651	-0.0695695	-0.106676	-0.400761	0.702966
30185618	1	14591.4	7993.03	11950.7	14349	11090.8	21315	17762		13.8328	12.9645	13.5448	13.8087	13.4371	14.3796		13.4474			0.385445	-0.48286	0.0974154	0.36128	-0.0103123	0.932197
30185618	1	33485.2	28311.2	32706.1	31653.2	26368.2	34285.1	36856		15.0312	14.7891	14.9973	14.9501	14.6865	15.0653		14.9392			0.0920381	-0.150112	0.0580738	0.0108667	-0.252684	0.126098
30185646	1	839.174	888.766	766.385	436.739	393.816	931.713	1962.36		9.71283	9.79566	9.58193	8.77063	8.62138	9.86374		9.6968			0.0160228	0.0988557	-0.114879	-0.926176	-1.07543	0.166939
30185650	1	460.572	1071.81	1743.74	774.094	562.088	1000.8	751.592		8.84728	10.0658	10.768	9.59636	9.13465	9.96694		9.89369			-1.04641	0.172135	0.874275	-0.297328	-0.759041	0.0732518
30185650	1	2069.77	2159.29	1941.57	1578.73	1753.22	1959.43	2084.58		11.0153	11.0763	10.923	10.6245	10.7758	10.9362		11.0049			0.010385	0.0714734	-0.0818584	-0.38032	-0.229076	-0.0686538
30185650	1	2338.23	2380.75	2536.53	1995.28	2187.97	1036.94	2407.03		11.1912	11.2172	11.3086	10.9624	11.0954	10.0181		11.239			-0.0478138	-0.0218127	0.0696265	-0.276639	-0.143633	-1.2209
30185650	1	1070.73	174.164	2224.42	1675.73	790.676	2136.35	2430.47		10.0644	7.4443	11.1192	10.7106	9.62694	11.0609		9.54263			0.521747	-2.09833	1.57658	1.16794	0.0843113	1.5183
30185650	1	3570.93	2383.08	1915.17	1771.62	2504.6	2054.02	2439.85		11.8021	11.2186	10.9033	10.7909	11.2904	11.0042		11.308			0.4941	-0.089372	-0.404728	-0.517132	-0.0176182	-0.303748
30185650	1	2717.66	2582.29	2537.74	2728.61	2119.91	928.309	2905.12		11.4082	11.3344	11.3093	11.4139	11.0498	9.85846		11.3506			0.0575127	-0.0162006	-0.0413121	0.0633102	-0.300853	-1.49218
30185650	1	2655.46	3378.53	2710.14	3659.35	341.473	2449.46	3021.23		11.3747	11.7222	11.4041	11.8374	8.41563	11.2583		11.5004			-0.125613	0.221822	-0.0962091	0.337013	-3.08473	-0.242109
30185662	1	3636.74	3721.19	3249.45	4523.42	2391.15	3142.55	5027.11		11.8284	11.8615	11.666	12.1432	11.2235	11.6177		11.7853			0.0431109	0.0762294	-0.11934	0.357879	-0.561828	-0.167598
30185662	1	7702.95	7660.16	9210.21	9699.54	6581.76	8745.41	10068.9		12.9112	12.9032	13.169	13.2437	12.6843	13.0943		12.9945			-0.083262	-0.091299	0.174561	0.249243	-0.310199	0.099852
30185674	1	2339.97	2031.96	1908.96	923.524	1885.9	2461.86	2018.37		11.1923	10.9887	10.8986	9.85101	10.881	11.2655		11.0265			0.165772	-0.0378443	-0.127927	-1.17549	-0.145463	0.239033
30185674	1	3846.43	2820.81	4623.42	3058.97	3728.44	3727.94	4978.93		11.9093	11.4619	12.1747	11.5788	11.8644	11.8642		11.8486			0.0606565	-0.386753	0.326096	-0.26982	0.0157103	0.0155153
30185674	1	7479.05	8035.09	10364.1	7825.41	7171.46	6894.03	10348.5		12.8686	12.9721	13.3393	12.934	12.8081	12.7511		13.06			-0.191374	-0.0879146	0.279288	-0.126063	-0.251963	-0.308881
30185712	1	2382.37	3930.57	3255.14	4112.2	2680.39	2744.53	5078.77		11.2182	11.9405	11.6685	12.0057	11.3882	11.4223		11.6091			-0.390886	0.331451	0.0594349	0.396625	-0.220845	-0.186729
30185712	1	8485.85	7105.51	10234.8	11159.8	8857.74	9068.11	14340		13.0508	12.7947	13.3212	13.446	13.1127	13.1466		13.0556			-0.00474339	-0.260864	0.265608	0.390441	0.0571375	0.0910007
30185729	1	735.879	690.729	1199.43	863.028	520.125	955.288	862.094		9.52333	9.43198	10.2281	9.75326	9.02271	9.89979		9.72781			-0.204487	-0.295836	0.500323	0.0254514	-0.705098	0.17198
30185729	1	4719.94	4274.52	4843.36	4334.73	4161.93	3206.16	4162.31		12.2046	12.0615	12.2418	12.0817	12.023	11.6466		12.1693			0.0352544	-0.10775	0.0724956	-0.0875725	-0.14626	-0.522667
30185752	1	1135.24	2296.13	594.257	480.106	813.431	593.179	1138.33		10.1488	11.165	9.21494	8.90721	9.66788	9.21232		10.1762			-0.027458	0.988753	-0.961295	-1.26903	-0.508363	-0.963915
30185752	1	1026.94	779.284	714.587	613.627	768.948	842.881	1851.44		10.0041	9.60601	9.48097	9.26122	9.58674	9.71919		9.69703			0.307097	-0.0910287	-0.216068	-0.435816	-0.110292	0.0221505
30185752	1	1153.09	626.848	1828.57	810.155	408.236	677.65	2005.54		10.1713	9.29197	10.8365	9.66205	8.67326	9.4044		10.0999			0.0713656	-0.807946	0.736581	-0.437865	-1.42666	-0.69552
30185752	1	830.792	642.932	1990.65	587.907	911.93	818.133	2301.36		9.69834	9.32852	10.959	9.19944	9.83278	9.67619		9.9953			-0.296954	-0.666774	0.963728	-0.795853	-0.162518	-0.319106
30185752	1	942.724	1568.56	2269.81	512.396	2293.04	2246.02	2403.92		9.88069	10.6152	11.1484	9.00111	11.163	11.1332		10.5481			-0.6674	0.0671341	0.600266	-1.54698	0.614956	0.585062
30185752	1	1870.55	2233.45	3435.1	2512.88	2260.65	2124	2486.96		10.8692	11.1251	11.7461	11.2951	11.1425	11.0526		11.2468			-0.377567	-0.121756	0.499323	0.0483095	-0.104293	-0.19425
30185752	1	2282.11	1053.66	2871.98	2436.9	2973.32	3227.26	2581.69		11.1562	10.0412	11.4878	11.2508	11.5379	11.6561		10.8951			0.261095	-0.853867	0.592772	0.355775	0.642804	0.761037
30185752	1	3658.04	3686.39	4509.52	2768.67	3693.04	4211.05	2916.29		11.8369	11.848	12.1388	11.435	11.8506	12.04		11.9412			-0.104345	-0.0932097	0.197555	-0.506226	-0.0906073	0.0987624
30185752	1	4299.99	2922.75	3128.38	761.026	914.675	848.975	3369.74		12.0701	11.5131	11.6112	9.5718	9.83712	9.72958		11.7315			0.338643	-0.218366	-0.120277	-2.15967	-1.89436	-2.0019
30185752	1	2205.14	3274.02	3276.71	1970.68	1854.22	4356.08	3725.03		11.1067	11.6768	11.678	10.9445	10.8566	12.0888		11.4872			-0.380525	0.189671	0.190855	-0.542699	-0.630579	0.601638
30185752	1	2323.59	1981.34	3631.77	511.016	2591.9	4264.3	3899.86		11.1821	10.9523	11.8265	8.99723	11.3398	12.0581		11.3203			-0.138148	-0.368023	0.506171	-2.32306	0.01951	0.737805
30185752	1	3721.66	3321.24	5485.12	2792.34	3433.28	5010.36	4536.41		11.8617	11.6975	12.4213	11.4473	11.7454	12.2907		11.9935			-0.131784	-0.296009	0.427793	-0.546257	-0.248141	0.297185
30185752	1	4803.14	4980.27	7585.83	4548.31	3405.07	6949.98	6224.31		12.2298	12.282	12.8891	12.1511	11.7335	12.7628		12.467			-0.23719	-0.184947	0.422137	-0.31584	-0.733487	0.29584
30185752	1	4375.56	2709.74	5476.99	1687.76	4292.2	5845.39	6898.91		12.0953	11.4039	12.4192	10.7209	12.0675	12.5131		11.9728			0.122466	-0.568848	0.446382	-1.25189	0.0947162	0.540297
30185752	1	5144.62	3972.3	8383.66	3746.02	5362.49	8188.64	8559.93		12.3288	11.9558	13.0334	11.8711	12.3887	12.9994		12.4393			-0.110475	-0.483565	0.59404	-0.56818	-0.0506361	0.560083
30185752	1	5816.01	2841.03	9749.73	2662.54	5817.7	9750.83	10500.8		12.5058	11.4722	13.2511	11.3786	12.5062	13.2513		12.4097			0.0960927	-0.93752	0.841427	-1.03113	0.0965136	0.841588
30185752	1	12195.1	10981	17089.3	7694.07	11542.7	15965.5	15886.9		13.574	13.4227	14.0608	12.9095	13.4947	13.9627		13.6858			-0.111836	-0.263121	0.374956	-0.776315	-0.191152	0.276826
30185761	1	548.361	423.269	486.211	880.529	1006.13	1172.11	743.636		9.09898	8.72543	8.92544	9.78223	9.9746	10.1949		8.91662			0.182365	-0.191186	0.00882193	0.865608	1.05798	1.27828
30185761	1	777.003	560.493	1310.74	2619.39	504.227	582.952	1563.15		9.60178	9.13055	10.3562	11.355	8.97793	9.18723		9.69616			-0.0943881	-0.565611	0.659999	1.65885	-0.718235	-0.50893
30185761	1	575.304	775.527	796.642	3634.14	664.531	1187.03	2215.38		9.16818	9.59903	9.63779	11.8274	9.37619	10.2131		9.46833			-0.300153	0.130699	0.169454	2.35906	-0.0921424	0.744811
30185834	1	4995.72	5229.97	6825.93	9212.98	5208.65	5635.8	6166.26		12.2865	12.3526	12.7368	13.1695	12.3467	12.4604		12.4586			-0.172147	-0.106039	0.278185	0.710828	-0.11193	0.0017803
30185834	1	5025.45	5476.65	7203.25	6835.17	4351.52	6797.26	6589.17		12.295	12.4191	12.8144	12.7388	12.0873	12.7307		12.5095			-0.214478	-0.0904381	0.304916	0.229245	-0.422213	0.221222
30185834	1	14544	13329.5	14228.5	19619.4	10284.1	11429.4	15784		13.8281	13.7023	13.7965	14.26	13.3281	13.4805		13.7757			0.0524824	-0.0733216	0.0208392	0.48434	-0.447529	-0.295198
30185835	1	1932.93	1907.34	2947.39	2114.34	1877.07	2493.04	2906.36		10.9166	10.8973	11.5252	11.046	10.8743	11.2837		11.113			-0.196473	-0.2157	0.412173	-0.0670546	-0.238781	0.170642
30185835	1	3448.57	3724	3915.27	4598.75	3399.38	4974.74	4330.02		11.7518	11.8626	11.9349	12.167	11.7311	12.2804		11.8498			-0.0979886	0.0128661	0.0851225	0.317255	-0.118717	0.430631
30185835	1	2360.23	3046.01	4582.23	4376.95	2987.42	3712.94	4691.99		11.2047	11.5727	12.1618	12.0957	11.5447	11.8583		11.6464			-0.441704	-0.0737116	0.515416	0.44929	-0.101733	0.211928
30185835	1	5017.88	6048.86	5976.11	6554.65	4761.78	5643.32	7425.5		12.2929	12.5624	12.545	12.6783	12.2173	12.4623		12.4668			-0.173905	0.0956797	0.0782251	0.211537	-0.24948	-0.00443912
30185835	1	10962.3	12982.7	13112.8	10324.8	10253	14561.6	12657.4		13.4203	13.6643	13.6787	13.3338	13.3238	13.8299		13.5878			-0.167491	0.0765543	0.0909369	-0.253928	-0.26399	0.242133
30185866	1	3458.92	5048.76	4726.24	4162.23	3035.23	2992.19	4058.8		11.7561	12.3017	12.2065	12.0231	11.5676	11.547		12.0881			-0.331992	0.213613	0.118379	-0.064958	-0.520511	-0.541115
30185900	1	2693.73	2034.51	2285.27	1824.82	1730.92	2392.71	2334.34		11.3954	10.9905	11.1582	10.8335	10.7573	11.2244		11.1813			0.214055	-0.190869	-0.0231857	-0.347796	-0.424013	0.0430955
30185924	1	6659.73	6730.81	5652.75	6129.08	5093.17	6891.43	7448.84		12.7012	12.7166	12.4647	12.5815	12.3143	12.7506		12.6275			0.0737306	0.0890481	-0.162779	-0.0460614	-0.313168	0.12307
30185943	1	18326.9	13499.6	15595.9	19705.9	20352.4	18811.4	21504.4		14.1617	13.7206	13.9289	14.2663	14.3129	14.1993		13.9371			0.224612	-0.216429	-0.00818296	0.32928	0.375849	0.262256
30185943	1	26434.1	25198.3	19599.7	31356.9	21808.3	28236.1	31358.8		14.6901	14.621	14.2585	14.9365	14.4126	14.7853		14.5232			0.166881	0.0978055	-0.264687	0.413263	-0.110638	0.262022
30185946	1	2036.86	1341.39	2463.96	4272.17	3278.89	1960.78	3804.02		10.9921	10.3895	11.2668	12.0608	11.679	10.9372		10.8828			0.109327	-0.493291	0.383964	1.17795	0.796191	0.0544102
30185952	1	3494.98	6022.19	4171.94	3671.66	3883.62	2688.75	3686.51		11.7711	12.5561	12.0265	11.8422	11.9232	11.3927		12.1179			-0.346812	0.43819	-0.0913786	-0.275667	-0.194696	-0.725162
30185990	1	8238.53	9735.14	8241.3	8169.7	5677.33	6368.51	9820.81		13.0082	13.249	13.0087	12.9961	12.471	12.6367		13.0886			-0.0804331	0.160382	-0.0799486	-0.0925371	-0.617607	-0.451864
30185990	1	13502.5	16052.5	13845.8	14255.5	13162.2	10631.2	16974.2		13.7209	13.9705	13.7572	13.7992	13.6841	13.376		13.8162			-0.095263	0.154307	-0.0590441	-0.0169661	-0.132088	-0.440188
30185990	1	15418.2	19864.1	18463.3	17112.2	9942.29	8064.75	25736.5		13.9123	14.2779	14.1724	14.0627	13.2794	12.9774		14.1209			-0.208518	0.157009	0.0515099	-0.0581246	-0.841503	-1.14345
30185990	1	62444.7	63525.9	57577.7	45425.4	41191.8	43290.7	71337.3		15.9303	15.9551	15.8132	15.4712	15.3301	15.4018		15.8995			0.0307674	0.0555339	-0.0863012	-0.428312	-0.569455	-0.497756
30186007	1	619.369	348.639	857.216	704.223	667.199	933.092	654.497		9.27465	8.44559	9.74351	9.45989	9.38197	9.86588		9.15459			0.120068	-0.708996	0.588928	0.305302	0.227386	0.711289
30186007	1	495.518	1932.39	2777.72	2612.97	672.426	1228.77	1151.22		8.95279	10.9162	11.4397	11.3515	9.39323	10.263		10.4362			-1.48342	0.479953	1.00347	0.915262	-1.04298	-0.173221
30186007	1	1193.06	2892.97	2927.94	2050.79	850.675	649.896	2016.73		10.2205	11.4983	11.5157	11.002	9.73246	9.34407		11.0782			-0.8577	0.420182	0.437518	-0.0761879	-1.34569	-1.73409
30186007	1	759.356	2048.1	940.986	2235.12	895.094	1043.78	2586.3		9.56863	11.0001	9.87803	11.1261	9.8059	10.0276		10.1489			-0.580277	0.851157	-0.27088	0.977229	-0.343014	-0.121309
30186007	1	2231.08	2798.39	3539.59	4902	1977.22	2023.24	2631.55		11.1235	11.4504	11.7894	12.2592	10.9493	10.9824		11.4544			-0.330898	-0.00404193	0.33494	0.80473	-0.505166	-0.471977
30186007	1	2123.36	2443.1	4634.39	3372.73	3330.59	2244.04	3009.71		11.0521	11.2545	12.1782	11.7197	11.7016	11.1319		11.4949			-0.442798	-0.240434	0.683233	0.224767	0.20663	-0.363048
30186007	1	1910.02	2682.7	2959.79	2686.05	2002.13	2190.2	3124.16		10.8994	11.3895	11.5313	11.3913	10.9673	11.0968		11.2734			-0.374001	0.116097	0.257905	0.117898	-0.306056	-0.176528
30186007	1	2062.28	872.665	910.757	2789.35	797.325	2645.17	3241.89		11.01	9.76928	9.83092	11.4457	9.63902	11.3691		10.2034			0.806616	-0.434127	-0.372489	1.2423	-0.564387	1.16573
30186007	1	3023.45	3998.42	3136.33	4500.53	1924.19	4070.27	3625.11		11.562	11.9652	11.6149	12.1359	10.91	11.9909		11.714			-0.152036	0.251195	-0.099159	0.421862	-0.803982	0.276889
30186007	1	3238.92	3664.91	4792.97	6168.09	3730.17	2675.19	6118.04		11.6613	11.8396	12.2267	12.5906	11.865	11.3854		11.9092			-0.24789	-0.0696259	0.317516	0.68142	-0.0441626	-0.523761
30186007	1	8602.42	10588.3	11021.7	12790.1	7436.77	8808.71	10585.4		13.0705	13.3702	13.4281	13.6427	12.8605	13.1047		13.2896			-0.219062	0.08059	0.138472	0.353148	-0.42913	-0.184875
30186007	1	7945.6	10720.8	8786.52	10653	6623.77	8438.25	11469		12.9559	13.3881	13.1011	13.379	12.6934	13.0427		13.1484			-0.192438	0.239741	-0.0473031	0.2306	-0.454942	-0.10565
30186007	1	15543.5	18142.9	15543.6	21152.8	10674.1	14977	17544.4		13.924	14.1471	13.924	14.3686	13.3818	13.8705		13.9984			-0.074369	0.148726	-0.0743575	0.37017	-0.616565	-0.127929
30186007	1	20078.6	19147.7	22380.7	28307.9	14034.7	19158.5	23473.6		14.2934	14.2249	14.45	14.7889	13.7767	14.2257		14.3227			-0.0293705	-0.0978592	0.12723	0.466179	-0.546024	-0.0970428
30186020	1	4000.04	3105.73	3765.94	4706.95	3495	3583.8	3426.15		11.9658	11.6007	11.8788	12.2006	11.7711	11.8073		11.8151			0.150696	-0.214387	0.0636918	0.385476	-0.0440256	-0.00782638
30186020	1	10111	8840.07	12691.3	15492.1	11429.5	11232.9	19964.5		13.3036	13.1098	13.6316	13.9192	13.4805	13.4554		13.3483			-0.0447057	-0.238505	0.283211	0.570894	0.132132	0.107102
30186024	1	495.932	484.941	905.449	532.451	389.1	594.096	435.909		8.954	8.92167	9.82249	9.05651	8.604	9.21455		9.23272			-0.278719	-0.311052	0.589771	-0.176213	-0.628721	-0.0181669
30186024	1	825.384	708.518	1982.35	1769.58	980.317	2107.19	2228.27		9.68892	9.46866	10.953	10.7892	9.9371	11.0411		10.0369			-0.347938	-0.568199	0.916137	0.752332	-0.0997559	1.00425
30186072	1	4833.13	6656.09	6705.36	9072.84	5824.92	6982.27	9015.85		12.2387	12.7005	12.7111	13.1473	12.508	12.7695		12.5501			-0.311358	0.15036	0.160999	0.597238	-0.0420771	0.219379
30186072	1	11505.1	13571.3	14848.5	22635.4	13076.5	15669.2	19423		13.49	13.7283	13.858	14.4663	13.6747	13.9356		13.6921			-0.202115	0.0361777	0.165937	0.7742	-0.0174019	0.243545
30186089	1	1185.7	2378.29	1850.44	5049.29	1868.73	2828.36	2056.94		10.2115	11.2157	10.8537	12.3019	10.8678	11.4658		10.7603			-0.548769	0.45541	0.0933589	1.54157	0.107541	0.705453
30186092	1	8540.43	12351	12251.7	15763.8	9509.67	12573.9	10120.6		13.0601	13.5923	13.5807	13.9443	13.2152	13.6181		13.411			-0.350952	0.181298	0.169654	0.53328	-0.195866	0.207094
30186103	1	2166.97	856.903	2325.54	2147.64	918.411	613.143	3335.71		11.0815	9.74299	11.1833	11.0685	9.843	9.26008		10.6693			0.412195	-0.926278	0.514083	0.399271	-0.826269	-1.40919
30186116	1	781.57	449.943	585.092	703.833	377.389	478.258	990.705		9.61023	8.8136	9.19252	9.45909	8.55991	8.90164		9.20545			0.404781	-0.391852	-0.0129292	0.253641	-0.645541	-0.303805
30186116	1	2798.41	5198.31	3369.72	4727.93	3259.06	3128.65	4646.93		11.4504	12.3438	11.7184	12.207	11.6702	11.6113		11.8375			-0.387151	0.506281	-0.11913	0.369448	-0.167306	-0.226222
30186116	1	5044.07	5972.18	7453.67	6233.1	4290.23	4726.84	4838.51		12.3004	12.544	12.8637	12.6057	12.0668	12.2067		12.5694			-0.26901	-0.0253422	0.294353	0.0363517	-0.502544	-0.362722
30186116	1	10209.8	9722.63	10071	12214.6	10137.3	7988.22	11805.2		13.3177	13.2471	13.2979	13.5763	13.3074	12.9637		13.2876			0.0300981	-0.040442	0.0103439	0.288751	0.0198097	-0.323915
30186116	1	14547	15335.7	12654	16687.5	11303.9	12247.8	18300.6		13.8284	13.9046	13.6273	14.0265	13.4645	13.5802		13.7868			0.0416512	0.117826	-0.159477	0.239703	-0.32224	-0.206549
30186116	1	14516.5	14002.4	17847.5	15927.8	12660.3	15481.4	23483.3		13.8254	13.7734	14.1234	13.9593	13.628	13.9182		13.9074			-0.0820065	-0.134019	0.216026	0.0518529	-0.279382	0.0108349
30186116	1	21317.4	20228.7	20201.7	23088	17984	16300.1	27661.7		14.3797	14.3041	14.3022	14.4949	14.1344	13.9926		14.3287			0.0510615	-0.0245691	-0.0264923	0.166173	-0.194259	-0.336086
30186116	1	50994.2	45508.5	46341.6	53887.6	47375.9	53127.8	65197		15.638	15.4738	15.5	15.7177	15.5319	15.6972		15.5373			0.10074	-0.0634553	-0.0372848	0.180361	-0.00543882	0.159874
30186116	1	66437.8	61813.1	70991.7	97118.4	69743.4	67821.3	95175.4		16.0197	15.9156	16.1154	16.5675	16.0898	16.0494		16.0169			0.00281456	-0.101276	0.0984612	0.550555	0.0728678	0.0325488
30186119	1	3112.6	2560.64	2992.67	2453.01	2743.32	2448.9	2960.66		11.6039	11.3223	11.5472	11.2603	11.4217	11.2579		11.4911			0.112768	-0.168848	0.0560797	-0.230798	-0.069428	-0.233216
30186143	1	967.07	801.204	2297.23	1037.68	790.559	1281.41	703.007		9.91748	9.64603	11.1657	10.0191	9.62673	10.3235		10.2431			-0.325584	-0.597033	0.922617	-0.223919	-0.616331	0.0804531
30186143	1	1278.09	2069.74	1048.04	821.368	774.474	517.324	1002.18		10.3198	11.0152	10.0335	9.68189	9.59707	9.01492		10.4562			-0.136386	0.559073	-0.422687	-0.774275	-0.859088	-1.44124
30186143	1	1234.81	2822.04	2843.61	4025.03	2773	3112.61	2288.24		10.2701	11.4625	11.4735	11.9748	11.4372	11.6039		11.0687			-0.798632	0.393824	0.404808	0.906082	0.368532	0.535208
30186143	1	1011.72	1995.5	2288.44	1890.98	2843.24	2368.52	2313.85		9.9826	10.9625	11.1601	10.8849	11.4733	11.2098		10.7018			-0.719165	0.260775	0.45839	0.183158	0.771561	0.508009
30186143	1	3627.83	3162.94	3733.76	5320.15	2722.37	3069.76	4750.01		11.8249	11.627	11.8664	12.3773	11.4106	11.5839		11.7728			0.0521071	-0.145736	0.0936284	0.604467	-0.362138	-0.188876
30186143	1	13450	13280.8	13021.1	17128.9	10918.7	7548.81	12979.2		13.7153	13.6971	13.6686	14.0641	13.4145	12.882		13.6936			0.0216716	0.00340772	-0.0250794	0.370499	-0.279138	-0.811615
30186150	1	3595.37	2672.4	4783.53	4532.79	4154.55	6194.18	5967.29		11.8119	11.3839	12.2239	12.1462	12.0205	12.5967		11.8066			0.00535672	-0.42265	0.417293	0.339616	0.21391	0.790129
30186150	1	26769.4	21553.7	33294.1	17592	24626.9	41471.5	35664.5		14.7083	14.3956	15.023	14.1026	14.5879	15.3398		14.709			-0.00067783	-0.313329	0.314006	-0.60634	-0.121024	0.63086
30186157	1	1107.57	938.225	906.252	1201.17	774.011	422.919	778.079		10.1132	9.87379	9.82377	10.2302	9.59621	8.72424		9.93691			0.176267	-0.0631221	-0.113145	0.293314	-0.340702	-1.21267
30186157	1	748.006	791.756	929.577	693.809	452.62	596.481	874.152		9.54691	9.62891	9.86043	9.4384	8.82216	9.22033		9.67875			-0.131844	-0.049837	0.181681	-0.240354	-0.856594	-0.458416
30186157	1	919.364	672.271	2009.03	2072.32	1530.1	534.824	946.548		9.84449	9.3929	10.9723	11.017	10.5794	9.06292		10.0699			-0.2254	-0.676993	0.902392	0.947143	0.509516	-1.00697
30186157	1	2340	2712.85	1944.1	1028.86	1682.39	508.972	1012.11		11.1923	11.4056	10.9249	10.0068	10.7163	8.99144		11.1743			0.0180358	0.231334	-0.249369	-1.16743	-0.45796	-2.18282
30186157	1	879.302	2319.06	2804.35	3488.44	2698.79	1857.42	1982.51		9.78021	11.1793	11.4534	11.7684	11.3981	10.8591		10.8043			-1.02412	0.374996	0.649119	0.964035	0.593767	0.0547512
30186157	1	2511.72	3645.59	3966.29	3269.05	1664.24	2696.52	2216.1		11.2945	11.8319	11.9536	11.6747	10.7006	11.3969		11.6933			-0.398862	0.138611	0.260251	-0.0186672	-0.992677	-0.296439
30186157	1	1130.35	3421.56	3501.94	1918.14	774.151	787.059	2268.89		10.1426	11.7404	11.7739	10.9055	9.59647	9.62033		11.219			-1.07643	0.521462	0.554963	-0.313482	-1.6225	-1.59865
30186157	1	591.107	352.694	536.617	884.01	489.362	479.566	2294.88		9.20728	8.46227	9.06775	9.78792	8.93476	8.90559		8.91243			0.294843	-0.45016	0.155317	0.875486	0.0223246	-0.00684671
30186157	1	969.043	788.268	2231.99	2272.59	2752.79	930.476	2307.24		9.92042	9.62254	11.1241	11.1501	11.4267	9.86182		10.2224			-0.301942	-0.599815	0.901757	0.927764	1.20432	-0.360534
30186157	1	855.048	2863.56	730.941	2707.67	2331.54	609.752	2701.19		9.73986	11.4836	9.51361	11.4028	11.1871	9.25208		10.2457			-0.505827	1.2379	-0.732077	1.15714	0.941379	-0.993611
30186157	1	3272.3	2963.25	2107.56	3516.2	1423.59	2396.15	2748.22		11.6761	11.533	11.0414	11.7798	10.4753	11.2265		11.4168			0.259285	0.116161	-0.375446	0.362999	-0.941484	-0.190299
30186157	1	2431.85	2380.98	3573.81	3832.39	3516.08	3396.26	2792.26		11.2478	11.2173	11.8032	11.904	11.7798	11.7297		11.4228			-0.174969	-0.205472	0.38044	0.481221	0.356944	0.306923
30186157	1	1481.64	3033.18	1868.75	2334.14	3285.22	1749.64	2999.12		10.533	11.5666	10.8679	11.1887	11.6818	10.7728		10.9892			-0.456171	0.577464	-0.121293	0.199523	0.692622	-0.216305
30186157	1	2983.23	4850.94	2733.52	3528.62	3412.22	1567.04	3210.37		11.5427	12.244	11.4165	11.7849	11.7365	10.6138		11.7344			-0.19176	0.509631	-0.317872	0.0504687	0.00207547	-1.12059
30186157	1	3298.1	1978.59	3290.61	4056.21	2632.65	2373.15	3562.77		11.6874	10.9503	11.6841	11.9859	11.3623	11.2126		11.4406			0.246812	-0.490345	0.243533	0.545313	-0.0783053	-0.228017
30186157	1	2633.82	3585.24	2175.25	3664.42	1731.28	1816.25	3675.3		11.3629	11.8079	11.087	11.8394	10.7576	10.8267		11.4193			-0.0563125	0.388601	-0.332289	0.420115	-0.661632	-0.592505
30186157	1	3024.51	4521.08	3325.52	6005.82	3519.19	2467.48	4041.02		11.5625	12.1425	11.6994	12.5521	11.781	11.2688		11.8014			-0.238946	0.341017	-0.102071	0.750712	-0.0204045	-0.532612
30186157	1	8375.42	7864.17	3873.13	5697.62	5357.56	3504.95	4218.14		13.0319	12.9411	11.9193	12.4761	12.3874	11.7752		12.6308			0.401176	0.310309	-0.711485	-0.154626	-0.243409	-0.855592
30186157	1	3879.75	3942.81	3814.95	4282.35	2669.7	3138.11	4254.27		11.9217	11.945	11.8975	12.0642	11.3825	11.6157		11.9214			0.000345072	0.0236067	-0.0239518	0.142784	-0.538942	-0.305721
30186157	1	2900.77	3631.7	3800.88	4144.16	3942.25	2599.34	4398.49		11.5022	11.8264	11.8921	12.0169	11.9448	11.3439		11.7403			-0.238036	0.0861749	0.151861	0.276609	0.204549	-0.396327
30186157	1	4598.2	4685.28	3675.46	4489.3	3113.63	2911.15	4789.7		12.1669	12.1939	11.8437	12.1323	11.6044	11.5074		12.0682			0.0986915	0.125759	-0.22445	0.0641128	-0.46378	-0.560789
30186157	1	3575.65	3966.41	3879.92	3913.85	3165.38	2734.91	5507.72		11.804	11.9536	11.9218	11.9344	11.6282	11.4173		11.8931			-0.0891495	0.0604779	0.0286716	0.0412321	-0.264976	-0.475864
30186157	1	6045.18	5477.56	7493.8	6361.67	5751.41	4614.77	6666.56		12.5616	12.4193	12.8715	12.6352	12.4897	12.172		12.6175			-0.0558863	-0.198139	0.254025	0.017734	-0.127756	-0.445414
30186157	1	8047.4	12382.6	7977.9	11083.5	9147.62	3943.76	9919.18		12.9743	13.596	12.9618	13.4361	13.1592	11.9454		13.1774			-0.20307	0.418654	-0.215583	0.258753	-0.0181953	-1.23202
30186157	1	11232	14823.3	13406.8	13696.9	12486.7	9806.64	14309		13.4553	13.8556	13.7107	13.7416	13.6081	13.2595		13.6739			-0.218536	0.181717	0.0368194	0.0676966	-0.0657572	-0.414317
30186173	1	2571.06	5935.13	3271.37	2351.35	665.631	2246.56	3148.29		11.3281	12.5351	11.6757	11.1993	9.37858	11.1335		11.8463			-0.518148	0.688765	-0.170617	-0.647024	-2.46772	-0.712795
30186221	1	2099.62	2230.14	1924.33	2281.39	649.163	2320.73	2680.76		11.0359	11.1229	10.9101	11.1557	9.34244	11.1804		11.023			0.0129227	0.0999281	-0.112851	0.132706	-1.68055	0.157375
30186259	1	7303.65	8179.86	9138.42	10630.4	7719.55	8271.36	11793.2		12.8344	12.9979	13.1577	13.3759	12.9143	13.0139		12.9967			-0.162262	0.00119614	0.161065	0.379246	-0.0823625	0.0172454
30186259	1	8966.69	11618.9	12814.5	12679.2	10984.2	9742.76	12670.8		13.1304	13.5042	13.6455	13.6302	13.4231	13.2501		13.4267			-0.296321	0.077508	0.218813	0.203499	-0.00353282	-0.176566
30186302	1	995.082	835.714	1817.61	3012.5	1972.11	640.158	993.788		9.95867	9.70686	10.8278	11.5567	10.9455	9.32228		10.1645			-0.205784	-0.45759	0.663375	1.39229	0.781068	-0.842172
30186302	1	3381.44	4260.58	3383.77	5372.88	2709.64	3307.05	4845.28		11.7234	12.0568	11.7244	12.3915	11.4039	11.6913		11.8349			-0.111469	0.221942	-0.110473	0.556591	-0.431003	-0.143559
30186331	1	4079.66	4828.51	3260.34	3154.15	2654.2	3737.6	5427.83		11.9942	12.2374	11.6708	11.623	11.3741	11.8679		11.9675			0.0267662	0.269895	-0.296661	-0.344429	-0.593406	-0.0995702
30186331	1	9478.06	7677.92	9197.28	12800.6	7501.34	13698	12111.4		13.2104	12.9065	13.167	13.6439	12.8729	13.7417		13.0946			0.115753	-0.188122	0.0723689	0.549305	-0.22169	0.647054
30186336	1	760.992	744.807	908.747	833.404	939.157	788.145	719.255		9.57174	9.54072	9.82774	9.70287	9.87522	9.62232		9.64673			-0.074994	-0.106009	0.181003	0.0561393	0.228491	-0.0244144
30186336	1	1819.06	1529.52	3631.63	2378.95	1680.04	1010.21	921.041		10.829	10.5789	11.8264	11.2161	10.7143	9.98044		11.0781			-0.2491	-0.499221	0.748321	0.138027	-0.363804	-1.09764
30186336	1	873.775	3123.1	1650.37	3380.14	2068.86	2738.12	1156.1		9.77112	11.6088	10.6886	11.7229	11.0146	11.419		10.6895			-0.918367	0.919275	-0.000907947	1.03338	0.325134	0.729484
30186336	1	501.81	1856.43	1966.9	2122.64	807.242	1135.98	2386.16		8.971	10.8583	10.9417	11.0516	9.65686	10.1497		10.257			-1.28601	0.601307	0.684702	0.794638	-0.600149	-0.107282
30186336	1	1795.63	2305.6	1765.19	1694.46	1922.58	1157.71	2396.73		10.8103	11.1709	10.7856	10.7266	10.9088	10.1771		10.9223			-0.111993	0.248657	-0.136664	-0.195659	-0.0134465	-0.745211
30186336	1	2429.78	3531.74	2695.26	3877.99	2308.86	1658.99	2648.79		11.2466	11.7862	11.3962	11.9211	11.173	10.6961		11.4763			-0.229716	0.309835	-0.0801188	0.444766	-0.303362	-0.780238
30186336	1	3126.22	2755.67	2956.96	3320.49	2335.47	2380.27	2874.14		11.6102	11.4282	11.5299	11.6972	11.1895	11.2169		11.5228			0.0874388	-0.0945762	0.00713746	0.174417	-0.333268	-0.305851
30186336	1	3090.71	2313.55	3900.51	4803.76	2378.42	3231.93	2988.2		11.5937	11.1759	11.9294	12.2299	11.2158	11.6582		11.5664			0.0273687	-0.390463	0.363094	0.663595	-0.350568	0.0918279
30186336	1	2187.35	2076.46	2128.5	2822.4	1780.39	1814.56	2993.04		11.095	11.0199	11.0556	11.4627	10.798	10.8254		11.0568			0.0381347	-0.036922	-0.00121269	0.405872	-0.258858	-0.231432
30186336	1	838.687	2165.01	755.089	1006.68	1645.53	778.54	3005.88		9.71199	11.0802	9.5605	9.97538	10.6843	9.60463		10.1175			-0.40556	0.962607	-0.557046	-0.142167	0.566788	-0.512922
30186336	1	2376.87	3220.69	3280.79	4138.58	1967.41	3225.63	3095.64		11.2148	11.6532	11.6798	12.0149	10.9421	11.6554		11.5159			-0.301096	0.137211	0.163886	0.498979	-0.573863	0.139424
30186336	1	2494.93	2955.04	3627.61	2786.16	2616.06	3022.1	3198.5		11.2848	11.529	11.8248	11.4441	11.3532	11.5613		11.5462			-0.261398	-0.0172233	0.278622	-0.10212	-0.193003	0.0151518
30186336	1	2878.08	4311.03	3314.13	4679.68	1442.24	2506.79	3209.23		11.4909	12.0738	11.6944	12.1922	10.4941	11.2916		11.753			-0.262149	0.320775	-0.0586264	0.439154	-1.25895	-0.461414
30186336	1	1953.88	616.603	2398.4	1587.66	767.395	2015.44	3245.57		10.9321	9.2682	11.2279	10.6327	9.58383	10.9769		10.4761			0.456066	-1.20786	0.751797	0.156624	-0.892234	0.500821
30186336	1	2599.92	2460.86	2738.36	4171.04	2863.12	2624.76	3888.57		11.3443	11.2649	11.4191	12.0262	11.4834	11.358		11.3428			0.00148705	-0.0778185	0.0763315	0.683426	0.14061	0.0152056
30186336	1	3954.87	3903.08	6034.23	4075.93	4406.46	4792.87	3931.07		11.9494	11.9304	12.559	11.9929	12.1054	12.2267		12.1463			-0.19684	-0.215857	0.412698	-0.153343	-0.0408508	0.0804191
30186336	1	3293.84	3713.26	4177.81	5404.54	4442.83	3516.92	4058.37		11.6856	11.8585	12.0285	12.4	12.1173	11.7801		11.8575			-0.171966	0.000953526	0.171012	0.542438	0.259743	-0.0774236
30186336	1	3646.02	1723.11	3793.48	3690.6	4794.85	2421.3	4135.12		11.8321	10.7508	11.8893	11.8496	12.2273	11.2416		11.4907			0.34137	-0.73994	0.39857	0.358903	0.736532	-0.249171
30186336	1	5203.39	5408.81	7076.77	7083.31	5877.96	4466.6	4303.82		12.3452	12.4011	12.7889	12.7902	12.5211	12.125		12.5117			-0.166499	-0.110641	0.27714	0.278471	0.00936256	-0.386776
30186336	1	2622.85	3207.9	3775.3	3196.03	2679.37	3278.17	4326.09		11.3569	11.6474	11.8824	11.6421	11.3877	11.6787		11.6289			-0.271984	0.0185095	0.253475	0.0131637	-0.241222	0.0497708
30186336	1	2965.23	4763.45	3895.31	3227.07	2025.45	2657.54	4460.87		11.5339	12.2178	11.9275	11.656	10.984	11.3759		11.8931			-0.359153	0.324712	0.0344409	-0.237072	-0.90905	-0.517204
30186336	1	5006.13	3523.05	4761.06	6452.37	3804.33	5321.56	4873.42		12.2895	11.7826	12.2171	12.6556	11.8934	12.3776		12.0964			0.193095	-0.313777	0.120682	0.55923	-0.202958	0.281248
30186336	1	4960.07	2677.99	4996.97	4116.26	4582.89	3808.45	5378.27		12.2761	11.3869	12.2868	12.0071	12.162	11.895		11.9833			0.292841	-0.596373	0.303532	0.0238132	0.178738	-0.0883172
30186336	1	3268.14	4481.9	3425.43	4270.1	3155.22	3638.37	5452.81		11.6743	12.1299	11.7421	12.0601	11.6235	11.8291		11.8487			-0.174486	0.281155	-0.106669	0.211316	-0.225213	-0.019663
30186336	1	7753.62	7406.77	5934.52	7455.45	4626.2	7583.51	6774.2		12.9207	12.8546	12.5349	12.8641	12.1756	12.8886		12.7701			0.150588	0.0845619	-0.23515	0.0940126	-0.594454	0.118583
30186336	1	62027.4	66334.3	69761.5	67216	47939.2	63198.1	64783.6		15.9206	16.0175	16.0901	16.0365	15.5489	15.9476		16.0094			-0.0887922	0.0080575	0.0807347	0.0271066	-0.460492	-0.061816
30186336	1	62005.5	78625.4	82841.9	80552.5	68913.8	72288.8	82199.4		15.9201	16.2627	16.3381	16.2976	16.0725	16.1415		16.1736			-0.253522	0.0890782	0.164444	0.124012	-0.101124	-0.0321442
30186351	1	714.577	696.05	593.131	461.79	1366.83	801.993	642.574		9.48095	9.44305	9.21221	8.85109	10.4166	9.64744		9.37873			0.102213	0.0643136	-0.166526	-0.527639	1.03788	0.268712
30186351	1	480.702	806.73	436.523	999.439	959.683	831.426	1140.33		8.909	9.65594	8.76991	9.96497	9.90641	9.69944		9.11162			-0.20262	0.544325	-0.341705	0.853357	0.794797	0.587827
30186351	1	1964.84	1777.52	2031.91	892.765	1822.53	450.016	1141.49		10.9402	10.7957	10.9886	9.80214	10.8317	8.81383		10.9082			0.0320387	-0.112504	0.0804657	-1.10602	-0.0764307	-2.09433
30186351	1	562.69	2136.58	935.854	2567.53	817.026	1161.9	1858.5		9.1362	11.0611	9.87014	11.3262	9.67424	10.1823		10.0225			-0.886279	1.03861	-0.152335	1.30369	-0.348238	0.159798
30186351	1	1154.96	1990.73	2572.17	3281.69	1711.12	1240.79	2108.34		10.1736	10.9591	11.3288	11.6802	10.7407	10.277		10.8205			-0.646863	0.138588	0.508275	0.859728	-0.0797723	-0.543451
30186351	1	1023.22	2874.91	1871.8	2868.38	758.511	1023.27	2677.67		9.9989	11.4893	10.8702	11.486	9.56703	9.99897		10.7861			-0.78724	0.703166	0.0840739	0.699885	-1.21911	-0.787171
30186351	1	2424.65	2600.85	3755.86	2182.31	1762.3	2220.96	2902.42		11.2436	11.3448	11.8749	11.0916	10.7832	11.117		11.4878			-0.244189	-0.142985	0.387174	-0.396114	-0.704506	-0.370782
30186351	1	3736.8	5819.27	4025.26	5176.81	3878.43	2870.28	4966.17		11.8676	12.5066	11.9749	12.3378	11.9213	11.487		12.1164			-0.24877	0.390264	-0.141494	0.22149	-0.195103	-0.629382
30186351	1	3573.15	2433.73	3918.31	3074.35	2948.9	2555.49	5285.87		11.803	11.249	11.936	11.5861	11.526	11.3194		11.6626			0.140332	-0.413699	0.273367	-0.0765851	-0.13669	-0.343265
30186351	1	5541.71	7172.61	7033.64	7275.55	5715.83	7104.44	6284.52		12.4361	12.8083	12.7801	12.8288	12.4807	12.7945		12.6748			-0.238702	0.133465	0.105237	0.154022	-0.19407	0.119687
30186351	1	9348.88	22814.9	17996.4	21999.7	18237.3	10923.8	17250.1		13.1906	14.4777	14.1354	14.4252	14.1546	13.4152		13.9346			-0.743983	0.543125	0.200857	0.490632	0.220043	-0.519373
30186362	1	1014.99	1914.21	669.248	2201.23	1840.25	3170.36	2836.77		9.98725	10.9025	9.3864	11.1041	10.8457	11.6304		10.0921			-0.10481	0.810472	-0.705662	1.01204	0.753628	1.53837
30186363	1	2016.53	2071.69	2712.8	2265.35	2947.3	3631.02	2805.73		10.9777	11.0166	11.4056	11.1455	11.5252	11.8262		11.1333			-0.155612	-0.116679	0.272291	0.0122415	0.391902	0.692883
30186363	1	3442.72	2230.47	2328.53	2645.26	2066.67	2690.79	3195.48		11.7493	11.1231	11.1852	11.3692	11.0131	11.3938		11.3526			0.396776	-0.229422	-0.167354	0.0166403	-0.339462	0.0412568
30186363	1	2555.17	3043.29	4225.55	3380.59	2858.04	3483.56	4384.75		11.3192	11.5714	12.0449	11.7231	11.4808	11.7663		11.6452			-0.325977	-0.073764	0.399741	0.0778802	-0.164372	0.121165
30186363	1	9157.97	5822.43	9480.3	6865.5	6427.73	9039.45	7459.86		13.1608	12.5074	13.2107	12.7451	12.6501	13.142		12.9596			0.201167	-0.45224	0.251073	-0.214496	-0.309551	0.182374
[truncated: 30,818 more rows]
